# Supplementary material for: Early evolution of BA.2.86 sheds light on the origins of highly divergent SARS-CoV-2 lineages
Source: bioRxiv preprint, doi:10.1101/2024.07.18.604213, version 2 (2024-12-25)
Supplement: Supplementary Data 1 [file 604213_file03.xlsx]

## Sheet: Supplementary Table 1
BA.2 genomes representing evolutionary intermediates leading to the BA.2.86* clade 1
					Ancestral to BA.2.86* in tree?
Header	Lin	EPI	Date	Country	D2	D3	D4
MT|BA.2|EPI_ISL_18821480|2022-03-11|Malaysia	BA.2	EPI_ISL_18821480	2022-03-11	Malaysia	NA	Yes	Yes
MT|BA.2|EPI_ISL_18821483|2022-03-11|Malaysia	BA.2	EPI_ISL_18821483	2022-03-11	Malaysia	NA	Yes	Yes
MT|BA.2|EPI_ISL_18821484|2022-03-11|Malaysia	BA.2	EPI_ISL_18821484	2022-03-11	Malaysia	NA	Yes	Yes
MT|BA.2|EPI_ISL_18821485|2022-03-11|Malaysia	BA.2	EPI_ISL_18821485	2022-03-11	Malaysia	NA	Yes	Yes
MT|BA.2|EPI_ISL_18821486|2022-03-11|Malaysia	BA.2	EPI_ISL_18821486	2022-03-11	Malaysia	NA	Yes	Yes
MT|BA.2|EPI_ISL_18821487|2022-03-11|Malaysia	BA.2	EPI_ISL_18821487	2022-03-11	Malaysia	NA	Yes	Yes
MT|BA.2|EPI_ISL_18821489|2022-03-11|Malaysia	BA.2	EPI_ISL_18821489	2022-03-11	Malaysia	NA	Yes	Yes
MT|BA.2|EPI_ISL_18821490|2022-03-11|Malaysia	BA.2	EPI_ISL_18821490	2022-03-11	Malaysia	NA	Yes	Yes
MT|BA.2|EPI_ISL_18821491|2022-03-11|Malaysia	BA.2	EPI_ISL_18821491	2022-03-11	Malaysia	NA	Yes	Yes
MT|BA.2|EPI_ISL_18821492|2022-03-11|Malaysia	BA.2	EPI_ISL_18821492	2022-03-11	Malaysia	NA	Yes	Yes
MT|BA.2|EPI_ISL_18821494|2022-03-11|Malaysia	BA.2	EPI_ISL_18821494	2022-03-11	Malaysia	NA	Yes	Yes
MT|BA.2|EPI_ISL_16731648|2023-01-15|USA	BA.2	EPI_ISL_16731648	2023-01-15	USA	NA	Yes	NA
BG|BA.2.1|EPI_ISL_17630096|2023-04-25|Spain	BA.2.1	EPI_ISL_17630096	2023-04-25	Spain	Yes	Yes	Yes
BG|BA.2.1|EPI_ISL_17797704|2023-05-26|Spain	BA.2.1	EPI_ISL_17797704	2023-05-26	Spain	Yes	Yes	Yes
MT|BA.2|EPI_ISL_18400451|2023-09-15|Spain	BA.2	EPI_ISL_18400451	2023-09-15	Spain	NA	Yes	NA
MT|BA.2|EPI_ISL_18377651|2023-09-25|Denmark	BA.2	EPI_ISL_18377651	2023-09-25	Denmark	NA	Yes	Yes
MT|BA.2|EPI_ISL_18385525|2023-09-29|England	BA.2	EPI_ISL_18385525	2023-09-29	England	NA	Yes	Yes
MT|BA.2|EPI_ISL_18457546|2023-10-16|Denmark	BA.2	EPI_ISL_18457546	2023-10-16	Denmark	NA	Yes	Yes
MT|BA.2|EPI_ISL_18546432|2023-11-05|USA	BA.2	EPI_ISL_18546432	2023-11-05	USA	NA	Yes	Yes
MT|BA.2|EPI_ISL_18496352|2023-11-07|Italy	BA.2	EPI_ISL_18496352	2023-11-07	Italy	NA	Yes	Yes
MT|BA.2|EPI_ISL_18555616|2023-11-11|USA	BA.2	EPI_ISL_18555616	2023-11-11	USA	NA	Yes	Yes
MT|BA.2|EPI_ISL_18557013|2023-11-13|Denmark	BA.2	EPI_ISL_18557013	2023-11-13	Denmark	NA	Yes	No
MT|BA.2|EPI_ISL_18509675|2023-11-13|Ireland	BA.2	EPI_ISL_18509675	2023-11-13	Ireland	NA	Yes	NA
MT|BA.2|EPI_ISL_18830206|2023-11-15|Mauritius	BA.2	EPI_ISL_18830206	2023-11-15	Mauritius	NA	Yes	NA
MT|BA.2|EPI_ISL_18548358|2023-11-16|Belgium	BA.2	EPI_ISL_18548358	2023-11-16	Belgium	NA	Yes	Yes
MT|BA.2|EPI_ISL_18690421|2023-11-19|USA	BA.2	EPI_ISL_18690421	2023-11-19	USA	NA	Yes	Yes
MT|BA.2|EPI_ISL_18726436|2023-11-21|Hungary	BA.2	EPI_ISL_18726436	2023-11-21	Hungary	NA	Yes	Yes
MT|BA.2|EPI_ISL_18744790|2023-11-21|Spain	BA.2	EPI_ISL_18744790	2023-11-21	Spain	NA	Yes	Yes
MT|BA.2|EPI_ISL_18744797|2023-11-21|Spain	BA.2	EPI_ISL_18744797	2023-11-21	Spain	NA	Yes	Yes
MT|BA.2|EPI_ISL_18744795|2023-11-22|Spain	BA.2	EPI_ISL_18744795	2023-11-22	Spain	NA	Yes	Yes
MT|BA.2|EPI_ISL_18659873|2023-11-27|Poland	BA.2	EPI_ISL_18659873	2023-11-27	Poland	NA	Yes	Yes
MT|BA.2|EPI_ISL_18744793|2023-11-27|Spain	BA.2	EPI_ISL_18744793	2023-11-27	Spain	NA	Yes	Yes
MT|BA.2|EPI_ISL_18744804|2023-11-27|Spain	BA.2	EPI_ISL_18744804	2023-11-27	Spain	NA	Yes	Yes
MT|BA.2|EPI_ISL_18668995|2023-11-28|Ireland	BA.2	EPI_ISL_18668995	2023-11-28	Ireland	NA	Yes	Yes
MT|BA.2|EPI_ISL_18735189|2023-11-29|Norway	BA.2	EPI_ISL_18735189	2023-11-29	Norway	NA	Yes	Yes
MT|BA.2|EPI_ISL_18669820|2023-11-29|USA	BA.2	EPI_ISL_18669820	2023-11-29	USA	NA	Yes	No
MT|BA.2|EPI_ISL_18908298|2023-11-30|Malaysia	BA.2	EPI_ISL_18908298	2023-11-30	Malaysia	NA	Yes	No
MT|BA.2|EPI_ISL_18863072|2023-11-30|Mauritius	BA.2	EPI_ISL_18863072	2023-11-30	Mauritius	NA	Yes	Yes
MT|BA.2|EPI_ISL_18671255|2023-11-30|New_Zealand	BA.2	EPI_ISL_18671255	2023-11-30	New_Zealand	NA	Yes	Yes
MT|BA.2|EPI_ISL_18677248|2023-12-01|Italy	BA.2	EPI_ISL_18677248	2023-12-01	Italy	NA	Yes	Yes
MT|BA.2|EPI_ISL_18863034|2023-12-01|Mauritius	BA.2	EPI_ISL_18863034	2023-12-01	Mauritius	NA	Yes	NA
MT|BA.2|EPI_ISL_18690496|2023-12-02|USA	BA.2	EPI_ISL_18690496	2023-12-02	USA	NA	Yes	Yes
MT|BA.2|EPI_ISL_18659272|2023-12-03|USA	BA.2	EPI_ISL_18659272	2023-12-03	USA	NA	Yes	Yes
MT|BA.2|EPI_ISL_18690466|2023-12-04|USA	BA.2	EPI_ISL_18690466	2023-12-04	USA	NA	Yes	Yes
MT|BA.2|EPI_ISL_18690036|2023-12-05|USA	BA.2	EPI_ISL_18690036	2023-12-05	USA	NA	Yes	Yes
MT|BA.2|EPI_ISL_18908106|2023-12-07|Malaysia	BA.2	EPI_ISL_18908106	2023-12-07	Malaysia	NA	Yes	NA
MT|BA.2|EPI_ISL_18719065|2023-12-07|USA	BA.2	EPI_ISL_18719065	2023-12-07	USA	NA	Yes	Yes
MT|BA.2|EPI_ISL_18700157|2023-12-12|USA	BA.2	EPI_ISL_18700157	2023-12-12	USA	NA	Yes	Yes
MT|BA.2|EPI_ISL_18912042|2023-12-13|USA	BA.2	EPI_ISL_18912042	2023-12-13	USA	NA	Yes	Yes
MT|BA.2|EPI_ISL_18798628|2023-12-15|Malaysia	BA.2	EPI_ISL_18798628	2023-12-15	Malaysia	NA	Yes	Yes
MT|BA.2|EPI_ISL_18721079|2023-12-15|USA	BA.2	EPI_ISL_18721079	2023-12-15	USA	NA	Yes	Yes
MT|BA.2|EPI_ISL_18690080|2023-12-16|USA	BA.2	EPI_ISL_18690080	2023-12-16	USA	NA	Yes	Yes
MT|BA.2|EPI_ISL_18742719|2023-12-16|USA	BA.2	EPI_ISL_18742719	2023-12-16	USA	NA	Yes	Yes
MT|BA.2|EPI_ISL_18743592|2023-12-16|USA	BA.2	EPI_ISL_18743592	2023-12-16	USA	NA	Yes	Yes
MT|BA.2|EPI_ISL_18886562|2023-12-18|Spain	BA.2	EPI_ISL_18886562	2023-12-18	Spain	NA	Yes	Yes
MT|BA.2|EPI_ISL_18743431|2023-12-19|USA	BA.2	EPI_ISL_18743431	2023-12-19	USA	NA	Yes	Yes
MT|BA.2|EPI_ISL_18743477|2023-12-19|USA	BA.2	EPI_ISL_18743477	2023-12-19	USA	NA	Yes	Yes
MT|BA.2|EPI_ISL_18749820|2023-12-19|USA	BA.2	EPI_ISL_18749820	2023-12-19	USA	NA	Yes	No
MT|BA.2|EPI_ISL_18883035|2023-12-20|Hungary	BA.2	EPI_ISL_18883035	2023-12-20	Hungary	NA	Yes	Yes
MT|BA.2|EPI_ISL_18744771|2023-12-20|Indonesia	BA.2	EPI_ISL_18744771	2023-12-20	Indonesia	NA	Yes	No
MT|BA.2|EPI_ISL_18722009|2023-12-20|Italy	BA.2	EPI_ISL_18722009	2023-12-20	Italy	NA	Yes	Yes
MT|BA.2|EPI_ISL_18714123|2023-12-20|USA	BA.2	EPI_ISL_18714123	2023-12-20	USA	NA	Yes	Yes
MT|BA.2|EPI_ISL_18743470|2023-12-20|USA	BA.2	EPI_ISL_18743470	2023-12-20	USA	NA	Yes	Yes
MT|BA.2|EPI_ISL_18746329|2023-12-21|Ireland	BA.2	EPI_ISL_18746329	2023-12-21	Ireland	NA	Yes	No
MT|BA.2|EPI_ISL_18886577|2023-12-22|Spain	BA.2	EPI_ISL_18886577	2023-12-22	Spain	NA	Yes	Yes
MT|BA.2|EPI_ISL_18837599|2023-12-22|USA	BA.2	EPI_ISL_18837599	2023-12-22	USA	NA	Yes	Yes
MT|BA.2|EPI_ISL_18837669|2023-12-23|USA	BA.2	EPI_ISL_18837669	2023-12-23	USA	NA	Yes	NA
MT|BA.2|EPI_ISL_18887450|2023-12-26|USA	BA.2	EPI_ISL_18887450	2023-12-26	USA	NA	Yes	NA
MT|BA.2|EPI_ISL_18746333|2023-12-27|Ireland	BA.2	EPI_ISL_18746333	2023-12-27	Ireland	NA	Yes	Yes
MT|BA.2|EPI_ISL_18743073|2023-12-27|USA	BA.2	EPI_ISL_18743073	2023-12-27	USA	NA	Yes	Yes
MT|BA.2|EPI_ISL_18743094|2023-12-27|USA	BA.2	EPI_ISL_18743094	2023-12-27	USA	NA	Yes	Yes
MT|BA.2|EPI_ISL_18722001|2023-12-28|Italy	BA.2	EPI_ISL_18722001	2023-12-28	Italy	NA	Yes	Yes
MT|BA.2|EPI_ISL_18743159|2023-12-28|USA	BA.2	EPI_ISL_18743159	2023-12-28	USA	NA	Yes	Yes
MT|BA.2|EPI_ISL_18733911|2023-12-30|USA	BA.2	EPI_ISL_18733911	2023-12-30	USA	NA	Yes	Yes
MT|BA.2|EPI_ISL_18721993|2023-12-31|Italy	BA.2	EPI_ISL_18721993	2023-12-31	Italy	NA	Yes	Yes
MT|BA.2|EPI_ISL_18857078|2023-12-31|USA	BA.2	EPI_ISL_18857078	2023-12-31	USA	NA	Yes	Yes
MT|BA.2|EPI_ISL_18908998|2023-12-31|USA	BA.2	EPI_ISL_18908998	2023-12-31	USA	NA	Yes	Yes
MT|BA.2|EPI_ISL_18912117|2023-12-31|USA	BA.2	EPI_ISL_18912117	2023-12-31	USA	NA	Yes	NA
MT|BA.2|EPI_ISL_18743350|2024-01-01|USA	BA.2	EPI_ISL_18743350	2024-01-01	USA	NA	Yes	No
MT|BA.2|EPI_ISL_18870275|2024-01-01|USA	BA.2	EPI_ISL_18870275	2024-01-01	USA	NA	Yes	NA
MT|BA.2|EPI_ISL_18816890|2024-01-02|USA	BA.2	EPI_ISL_18816890	2024-01-02	USA	NA	Yes	Yes
MT|BA.2|EPI_ISL_18792831|2024-01-03|Italy	BA.2	EPI_ISL_18792831	2024-01-03	Italy	NA	Yes	Yes
MT|BA.2|EPI_ISL_18792827|2024-01-04|Italy	BA.2	EPI_ISL_18792827	2024-01-04	Italy	NA	Yes	Yes
MT|BA.2|EPI_ISL_18792829|2024-01-04|Italy	BA.2	EPI_ISL_18792829	2024-01-04	Italy	NA	Yes	No
MT|BA.2|EPI_ISL_18746323|2024-01-05|Ireland	BA.2	EPI_ISL_18746323	2024-01-05	Ireland	NA	Yes	NA
MT|BA.2|EPI_ISL_18853184|2024-01-05|South_Korea	BA.2	EPI_ISL_18853184	2024-01-05	South_Korea	NA	Yes	Yes
MT|BA.2|EPI_ISL_18880408|2024-01-08|Australia	BA.2	EPI_ISL_18880408	2024-01-08	Australia	NA	Yes	NA
MT|BA.2|EPI_ISL_18792828|2024-01-08|Italy	BA.2	EPI_ISL_18792828	2024-01-08	Italy	NA	Yes	Yes
MT|BA.2|EPI_ISL_18794906|2024-01-09|Ireland	BA.2	EPI_ISL_18794906	2024-01-09	Ireland	NA	Yes	No
MT|BA.2|EPI_ISL_18841626|2024-01-09|Malaysia	BA.2	EPI_ISL_18841626	2024-01-09	Malaysia	NA	Yes	NA
MT|BA.2|EPI_ISL_18816528|2024-01-09|USA	BA.2	EPI_ISL_18816528	2024-01-09	USA	NA	Yes	Yes
MT|BA.2|EPI_ISL_18794903|2024-01-11|Ireland	BA.2	EPI_ISL_18794903	2024-01-11	Ireland	NA	Yes	No
MT|BA.2|EPI_ISL_18816401|2024-01-11|USA	BA.2	EPI_ISL_18816401	2024-01-11	USA	NA	Yes	Yes
MT|BA.2|EPI_ISL_18816709|2024-01-11|USA	BA.2	EPI_ISL_18816709	2024-01-11	USA	NA	Yes	Yes
MT|BA.2|EPI_ISL_18810805|2024-01-12|Canada	BA.2	EPI_ISL_18810805	2024-01-12	Canada	NA	Yes	Yes
MT|BA.2|EPI_ISL_18794910|2024-01-14|Ireland	BA.2	EPI_ISL_18794910	2024-01-14	Ireland	NA	Yes	No
MT|BA.2|EPI_ISL_18816612|2024-01-14|USA	BA.2	EPI_ISL_18816612	2024-01-14	USA	NA	Yes	Yes
MT|BA.2|EPI_ISL_18820154|2024-01-15|Italy	BA.2	EPI_ISL_18820154	2024-01-15	Italy	NA	Yes	Yes
MT|BA.2|EPI_ISL_18829108|2024-01-15|USA	BA.2	EPI_ISL_18829108	2024-01-15	USA	NA	Yes	Yes
MT|BA.2|EPI_ISL_18820147|2024-01-17|Italy	BA.2	EPI_ISL_18820147	2024-01-17	Italy	NA	Yes	Yes
MT|BA.2|EPI_ISL_18820150|2024-01-17|Italy	BA.2	EPI_ISL_18820150	2024-01-17	Italy	NA	Yes	Yes
MT|BA.2|EPI_ISL_18912053|2024-02-02|USA	BA.2	EPI_ISL_18912053	2024-02-02	USA	NA	Yes	NA
MT|BA.2|EPI_ISL_18914183|2024-02-08|Canada	BA.2	EPI_ISL_18914183	2024-02-08	Canada	NA	Yes	Yes
MT|BA.2|EPI_ISL_18704360|2023-12|India	BA.2	EPI_ISL_18704360	2023-12	India	NA	Yes	NA
1 Assemblies with available short-read data are highlighted in yellow. Assemblies with available ARTIC sequencing reports are highlighted in red

## Sheet: Supplementary Table 2
Early BA.2* genomes with ≥ 3 LDMs
ID	Lin	EPI	Date	Country
MT|BA.2|EPI_ISL_14814437|2022-01-18|India	BA.2	EPI_ISL_14814437	2022-01-18	India
MT|BA.2|EPI_ISL_14814438|2022-01-18|India	BA.2	EPI_ISL_14814438	2022-01-18	India
MT|BA.2|EPI_ISL_14814439|2022-01-20|India	BA.2	EPI_ISL_14814439	2022-01-20	India
MT|BA.2|EPI_ISL_14814442|2022-01-24|India	BA.2	EPI_ISL_14814442	2022-01-24	India
MT|BA.2|EPI_ISL_14814443|2022-02-02|India	BA.2	EPI_ISL_14814443	2022-02-02	India
MT|BA.2|EPI_ISL_16033450|2022-04-28|Finland	BA.2	EPI_ISL_16033450	2022-04-28	Finland
MT|BA.2|EPI_ISL_16061685|2022-05-06|Thailand	BA.2	EPI_ISL_16061685	2022-05-06	Thailand
MT|BA.2|EPI_ISL_16061715|2022-05-13|Thailand	BA.2	EPI_ISL_16061715	2022-05-13	Thailand
MT|BA.2|EPI_ISL_18520067|2022-05-16|Brazil	BA.2	EPI_ISL_18520067	2022-05-16	Brazil
MT|BA.2|EPI_ISL_13578717|2022-05-31|France	BA.2	EPI_ISL_13578717	2022-05-31	France
MT|BA.2|EPI_ISL_13900923|2022-06-10|Malaysia	BA.2	EPI_ISL_13900923	2022-06-10	Malaysia
MT|BA.2|EPI_ISL_14410186|2022-06-14|India	BA.2	EPI_ISL_14410186	2022-06-14	India
MT|BA.2|EPI_ISL_14408807|2022-06-18|India	BA.2	EPI_ISL_14408807	2022-06-18	India
MT|BA.2|EPI_ISL_13848061|2022-06-20|India	BA.2	EPI_ISL_13848061	2022-06-20	India
MT|BA.2|EPI_ISL_14408805|2022-06-20|India	BA.2	EPI_ISL_14408805	2022-06-20	India
MT|BA.2|EPI_ISL_13624768|2022-06-22|USA	BA.2	EPI_ISL_13624768	2022-06-22	USA
MT|BA.2|EPI_ISL_13640135|2022-06-26|India	BA.2	EPI_ISL_13640135	2022-06-26	India
MT|BA.2|EPI_ISL_14410188|2022-06-29|India	BA.2	EPI_ISL_14410188	2022-06-29	India
MT|BA.2|EPI_ISL_14099267|2022-06-30|India	BA.2	EPI_ISL_14099267	2022-06-30	India
MT|BA.2|EPI_ISL_14175394|2022-06-30|India	BA.2	EPI_ISL_14175394	2022-06-30	India
MT|BA.2|EPI_ISL_14260764|2022-07-01|India	BA.2	EPI_ISL_14260764	2022-07-01	India
MT|BA.2|EPI_ISL_14148662|2022-07-04|India	BA.2	EPI_ISL_14148662	2022-07-04	India
MT|BA.2|EPI_ISL_14727457|2022-07-05|Spain	BA.2	EPI_ISL_14727457	2022-07-05	Spain
MT|BA.2|EPI_ISL_14402485|2022-07-06|India	BA.2	EPI_ISL_14402485	2022-07-06	India
MT|BA.2|EPI_ISL_14167179|2022-07-07|India	BA.2	EPI_ISL_14167179	2022-07-07	India
MT|BA.2|EPI_ISL_14568787|2022-07-10|India	BA.2	EPI_ISL_14568787	2022-07-10	India
MT|BA.2|EPI_ISL_17608962|2022-07-10|India	BA.2	EPI_ISL_17608962	2022-07-10	India
MT|BA.2|EPI_ISL_14568781|2022-07-11|India	BA.2	EPI_ISL_14568781	2022-07-11	India
MT|BA.2|EPI_ISL_14568836|2022-07-11|India	BA.2	EPI_ISL_14568836	2022-07-11	India
MT|BA.2|EPI_ISL_17964746|2022-07-11|Indonesia	BA.2	EPI_ISL_17964746	2022-07-11	Indonesia
MT|BA.2|EPI_ISL_17964747|2022-07-11|Indonesia	BA.2	EPI_ISL_17964747	2022-07-11	Indonesia
MT|BA.2|EPI_ISL_17964748|2022-07-11|Indonesia	BA.2	EPI_ISL_17964748	2022-07-11	Indonesia
MT|BA.2|EPI_ISL_14568837|2022-07-12|India	BA.2	EPI_ISL_14568837	2022-07-12	India
MT|BA.2|EPI_ISL_15293930|2022-07-12|India	BA.2	EPI_ISL_15293930	2022-07-12	India
MT|BA.2|EPI_ISL_15294708|2022-07-12|India	BA.2	EPI_ISL_15294708	2022-07-12	India
MT|BA.2|EPI_ISL_14160820|2022-07-14|Russia	BA.2	EPI_ISL_14160820	2022-07-14	Russia
MT|BA.2|EPI_ISL_14357368|2022-07-14|India	BA.2	EPI_ISL_14357368	2022-07-14	India
MT|BA.2|EPI_ISL_14404265|2022-07-18|India	BA.2	EPI_ISL_14404265	2022-07-18	India
MT|BA.2|EPI_ISL_14567080|2022-07-18|India	BA.2	EPI_ISL_14567080	2022-07-18	India
MT|BA.2|EPI_ISL_14568795|2022-07-18|India	BA.2	EPI_ISL_14568795	2022-07-18	India
MT|BA.2|EPI_ISL_14215487|2022-07-19|India	BA.2	EPI_ISL_14215487	2022-07-19	India
MT|BA.2|EPI_ISL_14550867|2022-07-19|India	BA.2	EPI_ISL_14550867	2022-07-19	India
MT|BA.2|EPI_ISL_14550910|2022-07-19|India	BA.2	EPI_ISL_14550910	2022-07-19	India
MT|BA.2|EPI_ISL_14550887|2022-07-20|India	BA.2	EPI_ISL_14550887	2022-07-20	India
MT|BA.2|EPI_ISL_15058240|2022-07-20|India	BA.2	EPI_ISL_15058240	2022-07-20	India
MT|BA.2|EPI_ISL_14568811|2022-07-21|India	BA.2	EPI_ISL_14568811	2022-07-21	India
MT|BA.2|EPI_ISL_15058241|2022-07-21|India	BA.2	EPI_ISL_15058241	2022-07-21	India
MT|BA.2|EPI_ISL_14357525|2022-07-22|India	BA.2	EPI_ISL_14357525	2022-07-22	India
MT|BA.2|EPI_ISL_14567012|2022-07-22|India	BA.2	EPI_ISL_14567012	2022-07-22	India
MT|BA.2|EPI_ISL_14567040|2022-07-22|India	BA.2	EPI_ISL_14567040	2022-07-22	India
MT|BA.2|EPI_ISL_14568805|2022-07-22|India	BA.2	EPI_ISL_14568805	2022-07-22	India
MT|BA.2|EPI_ISL_15058183|2022-07-22|India	BA.2	EPI_ISL_15058183	2022-07-22	India
MT|BA.2|EPI_ISL_15294680|2022-07-22|India	BA.2	EPI_ISL_15294680	2022-07-22	India
MT|BA.2|EPI_ISL_14567008|2022-07-23|India	BA.2	EPI_ISL_14567008	2022-07-23	India
MT|BA.2|EPI_ISL_14567044|2022-07-23|India	BA.2	EPI_ISL_14567044	2022-07-23	India
MT|BA.2|EPI_ISL_14567067|2022-07-23|India	BA.2	EPI_ISL_14567067	2022-07-23	India
MT|BA.2|EPI_ISL_14796166|2022-07-23|India	BA.2	EPI_ISL_14796166	2022-07-23	India
MT|BA.2|EPI_ISL_14933122|2022-07-23|India	BA.2	EPI_ISL_14933122	2022-07-23	India
MT|BA.2|EPI_ISL_14937542|2022-07-23|India	BA.2	EPI_ISL_14937542	2022-07-23	India
MT|BA.2|EPI_ISL_14291320|2022-07-24|India	BA.2	EPI_ISL_14291320	2022-07-24	India
MT|BA.2|EPI_ISL_14396983|2022-07-24|India	BA.2	EPI_ISL_14396983	2022-07-24	India
MT|BA.2|EPI_ISL_14576837|2022-07-25|USA	BA.2	EPI_ISL_14576837	2022-07-25	USA
MT|BA.2|EPI_ISL_14890941|2022-07-25|India	BA.2	EPI_ISL_14890941	2022-07-25	India
MT|BA.2|EPI_ISL_14197724|2022-07-26|Denmark	BA.2	EPI_ISL_14197724	2022-07-26	Denmark
MT|BA.2|EPI_ISL_15509746|2022-07-26|France	BA.2	EPI_ISL_15509746	2022-07-26	France
MT|BA.2|EPI_ISL_14396972|2022-07-27|India	BA.2	EPI_ISL_14396972	2022-07-27	India
MT|BA.2|EPI_ISL_14585654|2022-07-28|India	BA.2	EPI_ISL_14585654	2022-07-28	India
MT|BA.2|EPI_ISL_15295075|2022-07-29|India	BA.2	EPI_ISL_15295075	2022-07-29	India
MT|BA.2|EPI_ISL_14910709|2022-07-30|India	BA.2	EPI_ISL_14910709	2022-07-30	India
MT|BA.2|EPI_ISL_14569950|2022-07-31|Indonesia	BA.2	EPI_ISL_14569950	2022-07-31	Indonesia
MT|BA.2|EPI_ISL_14910670|2022-08-01|India	BA.2	EPI_ISL_14910670	2022-08-01	India
MT|BA.2|EPI_ISL_14910740|2022-08-01|India	BA.2	EPI_ISL_14910740	2022-08-01	India
MT|BA.2|EPI_ISL_15509755|2022-08-01|France	BA.2	EPI_ISL_15509755	2022-08-01	France
MT|BA.2|EPI_ISL_15757263|2022-08-01|India	BA.2	EPI_ISL_15757263	2022-08-01	India
MT|BA.2|EPI_ISL_15757269|2022-08-02|India	BA.2	EPI_ISL_15757269	2022-08-02	India
MT|BA.2|EPI_ISL_15757272|2022-08-02|India	BA.2	EPI_ISL_15757272	2022-08-02	India
MT|BA.2|EPI_ISL_14910715|2022-08-03|India	BA.2	EPI_ISL_14910715	2022-08-03	India
MT|BA.2|EPI_ISL_14910728|2022-08-03|India	BA.2	EPI_ISL_14910728	2022-08-03	India
MT|BA.2|EPI_ISL_14910732|2022-08-03|India	BA.2	EPI_ISL_14910732	2022-08-03	India
MT|BA.2|EPI_ISL_15757285|2022-08-03|India	BA.2	EPI_ISL_15757285	2022-08-03	India
MT|BA.2|EPI_ISL_15757286|2022-08-03|India	BA.2	EPI_ISL_15757286	2022-08-03	India
MT|BA.2|EPI_ISL_14683500|2022-08-04|Spain	BA.2	EPI_ISL_14683500	2022-08-04	Spain
MT|BA.2|EPI_ISL_14910697|2022-08-04|India	BA.2	EPI_ISL_14910697	2022-08-04	India
MT|BA.2|EPI_ISL_14910711|2022-08-04|India	BA.2	EPI_ISL_14910711	2022-08-04	India
MT|BA.2|EPI_ISL_14987900|2022-08-04|India	BA.2	EPI_ISL_14987900	2022-08-04	India
MT|BA.2|EPI_ISL_15294750|2022-08-04|India	BA.2	EPI_ISL_15294750	2022-08-04	India
MT|BA.2|EPI_ISL_15294752|2022-08-04|India	BA.2	EPI_ISL_15294752	2022-08-04	India
MT|BA.2|EPI_ISL_15294853|2022-08-04|India	BA.2	EPI_ISL_15294853	2022-08-04	India
MT|BA.2|EPI_ISL_15332216|2022-08-04|India	BA.2	EPI_ISL_15332216	2022-08-04	India
MT|BA.2|EPI_ISL_15757297|2022-08-04|India	BA.2	EPI_ISL_15757297	2022-08-04	India
MT|BA.2|EPI_ISL_15757298|2022-08-04|India	BA.2	EPI_ISL_15757298	2022-08-04	India
MT|BA.2|EPI_ISL_14910729|2022-08-05|India	BA.2	EPI_ISL_14910729	2022-08-05	India
MT|BA.2|EPI_ISL_15057998|2022-08-05|India	BA.2	EPI_ISL_15057998	2022-08-05	India
MT|BA.2|EPI_ISL_15622770|2022-08-05|India	BA.2	EPI_ISL_15622770	2022-08-05	India
MT|BA.2|EPI_ISL_14814412|2022-08-07|India	BA.2	EPI_ISL_14814412	2022-08-07	India
MT|BA.2|EPI_ISL_15057964|2022-08-08|India	BA.2	EPI_ISL_15057964	2022-08-08	India
MT|BA.2|EPI_ISL_15153190|2022-08-08|India	BA.2	EPI_ISL_15153190	2022-08-08	India
MT|BA.2|EPI_ISL_15757306|2022-08-08|India	BA.2	EPI_ISL_15757306	2022-08-08	India
MT|BA.2|EPI_ISL_14923289|2022-08-09|India	BA.2	EPI_ISL_14923289	2022-08-09	India
MT|BA.2|EPI_ISL_15182041|2022-08-11|USA	BA.2	EPI_ISL_15182041	2022-08-11	USA
MT|BA.2|EPI_ISL_14923290|2022-08-12|India	BA.2	EPI_ISL_14923290	2022-08-12	India
MT|BA.2|EPI_ISL_18740566|2022-08-12|India	BA.2	EPI_ISL_18740566	2022-08-12	India
MT|BA.2|EPI_ISL_14923216|2022-08-16|India	BA.2	EPI_ISL_14923216	2022-08-16	India
MT|BA.2|EPI_ISL_15310150|2022-08-17|India	BA.2	EPI_ISL_15310150	2022-08-17	India
MT|BA.2|EPI_ISL_14910699|2022-08-18|India	BA.2	EPI_ISL_14910699	2022-08-18	India
MT|BA.2|EPI_ISL_14910747|2022-08-18|India	BA.2	EPI_ISL_14910747	2022-08-18	India
MT|BA.2|EPI_ISL_14910809|2022-08-19|India	BA.2	EPI_ISL_14910809	2022-08-19	India
MT|BA.2|EPI_ISL_17424755|2022-08-19|India	BA.2	EPI_ISL_17424755	2022-08-19	India
MT|BA.2|EPI_ISL_15754306|2022-08-23|India	BA.2	EPI_ISL_15754306	2022-08-23	India
MT|BA.2|EPI_ISL_14807145|2022-08-24|Netherlands	BA.2	EPI_ISL_14807145	2022-08-24	Netherlands
MT|BA.2|EPI_ISL_15420138|2022-08-25|Spain	BA.2	EPI_ISL_15420138	2022-08-25	Spain
MT|BA.2|EPI_ISL_15184330|2022-08-29|Canada	BA.2	EPI_ISL_15184330	2022-08-29	Canada
MT|BA.2|EPI_ISL_14983279|2022-09-01|USA	BA.2	EPI_ISL_14983279	2022-09-01	USA
MT|BA.2|EPI_ISL_14987890|2022-09-05|India	BA.2	EPI_ISL_14987890	2022-09-05	India
MT|BA.2|EPI_ISL_16046997|2022-09-05|Malaysia	BA.2	EPI_ISL_16046997	2022-09-05	Malaysia
MT|BA.2|EPI_ISL_16280770|2022-09-07|India	BA.2	EPI_ISL_16280770	2022-09-07	India
MT|BA.2|EPI_ISL_16724327|2022-09-07|Zimbabwe	BA.2	EPI_ISL_16724327	2022-09-07	Zimbabwe
MT|BA.2|EPI_ISL_16046998|2022-09-10|Malaysia	BA.2	EPI_ISL_16046998	2022-09-10	Malaysia
MT|BA.2|EPI_ISL_15231532|2022-09-12|India	BA.2	EPI_ISL_15231532	2022-09-12	India
MT|BA.2|EPI_ISL_15350790|2022-09-12|India	BA.2	EPI_ISL_15350790	2022-09-12	India
MT|BA.2|EPI_ISL_18754592|2022-09-13|India	BA.2	EPI_ISL_18754592	2022-09-13	India
MT|BA.2|EPI_ISL_15757318|2022-09-14|India	BA.2	EPI_ISL_15757318	2022-09-14	India
MT|BA.2|EPI_ISL_15350816|2022-09-16|India	BA.2	EPI_ISL_15350816	2022-09-16	India
MT|BA.2|EPI_ISL_15617482|2022-09-17|India	BA.2	EPI_ISL_15617482	2022-09-17	India
MT|BA.2|EPI_ISL_15231508|2022-09-21|India	BA.2	EPI_ISL_15231508	2022-09-21	India
MT|BA.2|EPI_ISL_15661483|2022-09-21|India	BA.2	EPI_ISL_15661483	2022-09-21	India
MT|BA.2|EPI_ISL_15828616|2022-09-27|Russia	BA.2	EPI_ISL_15828616	2022-09-27	Russia
MT|BA.2|EPI_ISL_16183022|2022-09-30|India	BA.2	EPI_ISL_16183022	2022-09-30	India
MT|BA.2|EPI_ISL_15854994|2022-10-03|India	BA.2	EPI_ISL_15854994	2022-10-03	India
MT|BA.2|EPI_ISL_15743116|2022-10-07|India	BA.2	EPI_ISL_15743116	2022-10-07	India
MT|BA.2|EPI_ISL_16247208|2022-10-07|Spain	BA.2	EPI_ISL_16247208	2022-10-07	Spain
MT|BA.2|EPI_ISL_15757331|2022-10-10|India	BA.2	EPI_ISL_15757331	2022-10-10	India
MT|BA.2|EPI_ISL_16047006|2022-10-10|Malaysia	BA.2	EPI_ISL_16047006	2022-10-10	Malaysia
MT|BA.2|EPI_ISL_15469908|2022-10-12|India	BA.2	EPI_ISL_15469908	2022-10-12	India
MT|BA.2|EPI_ISL_16046979|2022-10-13|Malaysia	BA.2	EPI_ISL_16046979	2022-10-13	Malaysia
MT|BA.2|EPI_ISL_15644391|2022-10-14|Germany	BA.2	EPI_ISL_15644391	2022-10-14	Germany
MT|BA.2|EPI_ISL_15854941|2022-10-14|India	BA.2	EPI_ISL_15854941	2022-10-14	India
MT|BA.2|EPI_ISL_16047009|2022-10-14|Malaysia	BA.2	EPI_ISL_16047009	2022-10-14	Malaysia
MT|BA.2|EPI_ISL_15513570|2022-10-17|Chile	BA.2	EPI_ISL_15513570	2022-10-17	Chile
MT|BA.2|EPI_ISL_16350706|2022-10-17|India	BA.2	EPI_ISL_16350706	2022-10-17	India
MT|BA.2|EPI_ISL_15854986|2022-10-18|India	BA.2	EPI_ISL_15854986	2022-10-18	India
MT|BA.2|EPI_ISL_15671878|2022-10-19|Malaysia	BA.2	EPI_ISL_15671878	2022-10-19	Malaysia
MT|BA.2|EPI_ISL_16436872|2022-10-19|Kuwait	BA.2	EPI_ISL_16436872	2022-10-19	Kuwait
MT|BA.2|EPI_ISL_15577636|2022-10-20|USA	BA.2	EPI_ISL_15577636	2022-10-20	USA
MT|BA.2|EPI_ISL_15706609|2022-10-23|USA	BA.2	EPI_ISL_15706609	2022-10-23	USA
MT|BA.2|EPI_ISL_16372276|2022-10-24|India	BA.2	EPI_ISL_16372276	2022-10-24	India
MT|BA.2|EPI_ISL_16046985|2022-10-27|Malaysia	BA.2	EPI_ISL_16046985	2022-10-27	Malaysia
MT|BA.2|EPI_ISL_16046986|2022-10-27|Malaysia	BA.2	EPI_ISL_16046986	2022-10-27	Malaysia
MT|BA.2|EPI_ISL_16046989|2022-11-01|Malaysia	BA.2	EPI_ISL_16046989	2022-11-01	Malaysia
MT|BA.2|EPI_ISL_16368875|2022-11-03|Malaysia	BA.2	EPI_ISL_16368875	2022-11-03	Malaysia
MT|BA.2|EPI_ISL_16030247|2022-11-04|Thailand	BA.2	EPI_ISL_16030247	2022-11-04	Thailand
MT|BA.2|EPI_ISL_16073469|2022-11-04|Argentina	BA.2	EPI_ISL_16073469	2022-11-04	Argentina
MT|BA.2|EPI_ISL_16019056|2022-11-06|Thailand	BA.2	EPI_ISL_16019056	2022-11-06	Thailand
MT|BA.2|EPI_ISL_16040719|2022-11-07|Malaysia	BA.2	EPI_ISL_16040719	2022-11-07	Malaysia
MT|BA.2|EPI_ISL_16097727|2022-11-07|Ireland	BA.2	EPI_ISL_16097727	2022-11-07	Ireland
MT|BA.2|EPI_ISL_16449528|2022-11-07|Malaysia	BA.2	EPI_ISL_16449528	2022-11-07	Malaysia
MT|BA.2|EPI_ISL_16449534|2022-11-07|Malaysia	BA.2	EPI_ISL_16449534	2022-11-07	Malaysia
MT|BA.2|EPI_ISL_16449536|2022-11-07|Malaysia	BA.2	EPI_ISL_16449536	2022-11-07	Malaysia
MT|BA.2|EPI_ISL_16097629|2022-11-08|Ireland	BA.2	EPI_ISL_16097629	2022-11-08	Ireland
MT|BA.2|EPI_ISL_16049706|2022-11-09|Solomon_Islands	BA.2	EPI_ISL_16049706	2022-11-09	Solomon_Islands
MT|BA.2|EPI_ISL_16170539|2022-11-09|India	BA.2	EPI_ISL_16170539	2022-11-09	India
MT|BA.2|EPI_ISL_17827592|2022-11-13|Australia	BA.2	EPI_ISL_17827592	2022-11-13	Australia
MT|BA.2|EPI_ISL_16245627|2022-11-14|Spain	BA.2	EPI_ISL_16245627	2022-11-14	Spain
MT|BA.2|EPI_ISL_16465351|2022-11-16|Malaysia	BA.2	EPI_ISL_16465351	2022-11-16	Malaysia
MT|BA.2|EPI_ISL_16913144|2022-11-17|Jamaica	BA.2	EPI_ISL_16913144	2022-11-17	Jamaica
MT|BA.2|EPI_ISL_16259781|2022-11-18|India	BA.2	EPI_ISL_16259781	2022-11-18	India
MT|BA.2|EPI_ISL_16180348|2022-11-19|Malaysia	BA.2	EPI_ISL_16180348	2022-11-19	Malaysia
MT|BA.2|EPI_ISL_16159409|2022-11-20|India	BA.2	EPI_ISL_16159409	2022-11-20	India
MT|BA.2|EPI_ISL_17215460|2022-11-23|Spain	BA.2	EPI_ISL_17215460	2022-11-23	Spain
MT|BA.2|EPI_ISL_16741242|2022-11-24|Mauritius	BA.2	EPI_ISL_16741242	2022-11-24	Mauritius
MT|BA.2|EPI_ISL_16245400|2022-11-25|Spain	BA.2	EPI_ISL_16245400	2022-11-25	Spain
MT|BA.2|EPI_ISL_16245414|2022-11-26|Spain	BA.2	EPI_ISL_16245414	2022-11-26	Spain
MT|BA.2|EPI_ISL_16012841|2022-11-27|USA	BA.2	EPI_ISL_16012841	2022-11-27	USA
MT|BA.2|EPI_ISL_17349770|2022-11-28|India	BA.2	EPI_ISL_17349770	2022-11-28	India
MT|BA.2|EPI_ISL_16234534|2022-11-29|Ireland	BA.2	EPI_ISL_16234534	2022-11-29	Ireland
MT|BA.2|EPI_ISL_16729840|2022-11-29|USA	BA.2	EPI_ISL_16729840	2022-11-29	USA
MT|BA.2|EPI_ISL_16549005|2022-12-01|Malaysia	BA.2	EPI_ISL_16549005	2022-12-01	Malaysia
MT|BA.2|EPI_ISL_16473689|2022-12-02|Indonesia	BA.2	EPI_ISL_16473689	2022-12-02	Indonesia
MT|BA.2|EPI_ISL_16171387|2022-12-05|USA	BA.2	EPI_ISL_16171387	2022-12-05	USA
MT|BA.2|EPI_ISL_16424130|2022-12-05|Turkey	BA.2	EPI_ISL_16424130	2022-12-05	Turkey
MT|BA.2|EPI_ISL_16172802|2022-12-07|USA	BA.2	EPI_ISL_16172802	2022-12-07	USA
MT|BA.2|EPI_ISL_16283931|2022-12-07|France	BA.2	EPI_ISL_16283931	2022-12-07	France
MT|BA.2|EPI_ISL_18131985|2022-12-07|Mexico	BA.2	EPI_ISL_18131985	2022-12-07	Mexico
MT|BA.2|EPI_ISL_16221380|2022-12-09|Germany	BA.2	EPI_ISL_16221380	2022-12-09	Germany
MT|BA.2|EPI_ISL_16682325|2022-12-10|USA	BA.2	EPI_ISL_16682325	2022-12-10	USA
MT|BA.2|EPI_ISL_17504467|2022-12-10|USA	BA.2	EPI_ISL_17504467	2022-12-10	USA
MT|BA.2|EPI_ISL_16556589|2022-12-12|Austria	BA.2	EPI_ISL_16556589	2022-12-12	Austria
MT|BA.2|EPI_ISL_16561181|2022-12-13|Austria	BA.2	EPI_ISL_16561181	2022-12-13	Austria
MT|BA.2|EPI_ISL_16423219|2022-12-14|USA	BA.2	EPI_ISL_16423219	2022-12-14	USA
MT|BA.2|EPI_ISL_16735623|2022-12-14|Mexico	BA.2	EPI_ISL_16735623	2022-12-14	Mexico
MT|BA.2|EPI_ISL_17037237|2022-12-14|Malaysia	BA.2	EPI_ISL_17037237	2022-12-14	Malaysia
MT|BA.2|EPI_ISL_16259778|2022-12-15|India	BA.2	EPI_ISL_16259778	2022-12-15	India
MT|BA.2|EPI_ISL_16423228|2022-12-15|USA	BA.2	EPI_ISL_16423228	2022-12-15	USA
MT|BA.2|EPI_ISL_17347921|2022-12-15|Puerto_Rico	BA.2	EPI_ISL_17347921	2022-12-15	Puerto_Rico
MT|BA.2|EPI_ISL_16431011|2022-12-18|USA	BA.2	EPI_ISL_16431011	2022-12-18	USA
MT|BA.2|EPI_ISL_16431012|2022-12-18|USA	BA.2	EPI_ISL_16431012	2022-12-18	USA
MT|BA.2|EPI_ISL_16381425|2022-12-19|USA	BA.2	EPI_ISL_16381425	2022-12-19	USA
MT|BA.2|EPI_ISL_16433923|2022-12-19|New_Zealand	BA.2	EPI_ISL_16433923	2022-12-19	New_Zealand
MT|BA.2|EPI_ISL_16649909|2022-12-19|Morocco	BA.2	EPI_ISL_16649909	2022-12-19	Morocco
MT|BA.2|EPI_ISL_16398060|2022-12-20|USA	BA.2	EPI_ISL_16398060	2022-12-20	USA
MT|BA.2|EPI_ISL_16551262|2022-12-20|Austria	BA.2	EPI_ISL_16551262	2022-12-20	Austria
MT|BA.2|EPI_ISL_16713315|2022-12-20|Jilin	BA.2	EPI_ISL_16713315	2022-12-20	Jilin
MT|BA.2|EPI_ISL_16413891|2022-12-21|South_Korea	BA.2	EPI_ISL_16413891	2022-12-21	South_Korea
MT|BA.2|EPI_ISL_16612080|2022-12-22|Italy	BA.2	EPI_ISL_16612080	2022-12-22	Italy
MT|BA.2|EPI_ISL_16612088|2022-12-22|Italy	BA.2	EPI_ISL_16612088	2022-12-22	Italy
MT|BA.2|EPI_ISL_17037250|2022-12-22|Malaysia	BA.2	EPI_ISL_17037250	2022-12-22	Malaysia
MT|BA.2|EPI_ISL_17037252|2022-12-22|Malaysia	BA.2	EPI_ISL_17037252	2022-12-22	Malaysia
MT|BA.2|EPI_ISL_16431084|2022-12-23|USA	BA.2	EPI_ISL_16431084	2022-12-23	USA
MT|BA.2|EPI_ISL_16462642|2022-12-23|India	BA.2	EPI_ISL_16462642	2022-12-23	India
MT|BA.2|EPI_ISL_17037254|2022-12-23|Malaysia	BA.2	EPI_ISL_17037254	2022-12-23	Malaysia
MT|BA.2|EPI_ISL_16457740|2022-12-24|Denmark	BA.2	EPI_ISL_16457740	2022-12-24	Denmark
MT|BA.2|EPI_ISL_16447588|2022-12-26|France	BA.2	EPI_ISL_16447588	2022-12-26	France
MT|BA.2|EPI_ISL_16870757|2022-12-27|Colombia	BA.2	EPI_ISL_16870757	2022-12-27	Colombia
MT|BA.2|EPI_ISL_16377998|2022-12-28|Austria	BA.2	EPI_ISL_16377998	2022-12-28	Austria
MT|BA.2|EPI_ISL_16738020|2022-12-28|Spain	BA.2	EPI_ISL_16738020	2022-12-28	Spain
MT|BA.2|EPI_ISL_16649933|2022-12-29|Morocco	BA.2	EPI_ISL_16649933	2022-12-29	Morocco
MT|BA.2|EPI_ISL_16942155|2022-12-29|India	BA.2	EPI_ISL_16942155	2022-12-29	India
MT|BA.2|EPI_ISL_17527160|2022-12-29|Sweden	BA.2	EPI_ISL_17527160	2022-12-29	Sweden
MT|BA.2|EPI_ISL_16459348|2022-12-30|India	BA.2	EPI_ISL_16459348	2022-12-30	India
MT|BA.2|EPI_ISL_16474116|2022-12-30|Ireland	BA.2	EPI_ISL_16474116	2022-12-30	Ireland
MT|BA.2|EPI_ISL_16474134|2022-12-31|Ireland	BA.2	EPI_ISL_16474134	2022-12-31	Ireland
MT|BA.2|EPI_ISL_17037256|2023-01-02|Malaysia	BA.2	EPI_ISL_17037256	2023-01-02	Malaysia
MT|BA.2|EPI_ISL_16542938|2023-01-05|USA	BA.2	EPI_ISL_16542938	2023-01-05	USA
MT|BA.2|EPI_ISL_16641597|2023-01-05|Ireland	BA.2	EPI_ISL_16641597	2023-01-05	Ireland
MT|BA.2|EPI_ISL_18048687|2023-01-05|Kuwait	BA.2	EPI_ISL_18048687	2023-01-05	Kuwait
MT|BA.2|EPI_ISL_16586683|2023-01-07|England	BA.2	EPI_ISL_16586683	2023-01-07	England
MT|BA.2|EPI_ISL_17037261|2023-01-07|Malaysia	BA.2	EPI_ISL_17037261	2023-01-07	Malaysia
MT|BA.2|EPI_ISL_16527367|2023-01-11|Austria	BA.2	EPI_ISL_16527367	2023-01-11	Austria
MT|BA.2|EPI_ISL_16599391|2023-01-11|USA	BA.2	EPI_ISL_16599391	2023-01-11	USA
MT|BA.2|EPI_ISL_16599288|2023-01-12|USA	BA.2	EPI_ISL_16599288	2023-01-12	USA
MT|BA.2|EPI_ISL_16823204|2023-01-12|India	BA.2	EPI_ISL_16823204	2023-01-12	India
MT|BA.2|EPI_ISL_16613416|2023-01-13|Spain	BA.2	EPI_ISL_16613416	2023-01-13	Spain
MT|BA.2|EPI_ISL_16762458|2023-01-17|USA	BA.2	EPI_ISL_16762458	2023-01-17	USA
MT|BA.2|EPI_ISL_16762462|2023-01-17|USA	BA.2	EPI_ISL_16762462	2023-01-17	USA
MT|BA.2|EPI_ISL_16919578|2023-01-18|USA	BA.2	EPI_ISL_16919578	2023-01-18	USA
MT|BA.2|EPI_ISL_16762028|2023-01-20|USA	BA.2	EPI_ISL_16762028	2023-01-20	USA
MT|BA.2|EPI_ISL_16947614|2023-01-20|Malaysia	BA.2	EPI_ISL_16947614	2023-01-20	Malaysia
MT|BA.2|EPI_ISL_16997077|2023-01-23|Italy	BA.2	EPI_ISL_16997077	2023-01-23	Italy
MT|BA.2|EPI_ISL_16762309|2023-01-24|USA	BA.2	EPI_ISL_16762309	2023-01-24	USA
MT|BA.2|EPI_ISL_16762258|2023-01-25|USA	BA.2	EPI_ISL_16762258	2023-01-25	USA
MT|BA.2|EPI_ISL_17821395|2023-01-26|USA	BA.2	EPI_ISL_17821395	2023-01-26	USA
MT|BA.2|EPI_ISL_16882917|2023-01-27|Germany	BA.2	EPI_ISL_16882917	2023-01-27	Germany
MT|BA.2|EPI_ISL_16947625|2023-01-27|Malaysia	BA.2	EPI_ISL_16947625	2023-01-27	Malaysia
MT|BA.2|EPI_ISL_16882928|2023-01-28|Germany	BA.2	EPI_ISL_16882928	2023-01-28	Germany
MT|BA.2|EPI_ISL_16883059|2023-01-28|Germany	BA.2	EPI_ISL_16883059	2023-01-28	Germany
MT|BA.2|EPI_ISL_16883170|2023-01-28|Germany	BA.2	EPI_ISL_16883170	2023-01-28	Germany
MT|BA.2|EPI_ISL_16886072|2023-01-28|Germany	BA.2	EPI_ISL_16886072	2023-01-28	Germany
MT|BA.2|EPI_ISL_16883095|2023-01-31|Germany	BA.2	EPI_ISL_16883095	2023-01-31	Germany
MT|BA.2|EPI_ISL_16919851|2023-01-31|USA	BA.2	EPI_ISL_16919851	2023-01-31	USA
MT|BA.2|EPI_ISL_16883034|2023-02-01|Germany	BA.2	EPI_ISL_16883034	2023-02-01	Germany
MT|BA.2|EPI_ISL_16883038|2023-02-01|Germany	BA.2	EPI_ISL_16883038	2023-02-01	Germany
MT|BA.2|EPI_ISL_16883062|2023-02-01|Germany	BA.2	EPI_ISL_16883062	2023-02-01	Germany
MT|BA.2|EPI_ISL_16883117|2023-02-01|Germany	BA.2	EPI_ISL_16883117	2023-02-01	Germany
MT|BA.2|EPI_ISL_16940243|2023-02-02|Germany	BA.2	EPI_ISL_16940243	2023-02-02	Germany
MT|BA.2|EPI_ISL_17090268|2023-02-02|South_Korea	BA.2	EPI_ISL_17090268	2023-02-02	South_Korea
MT|BA.2|EPI_ISL_16940158|2023-02-03|Germany	BA.2	EPI_ISL_16940158	2023-02-03	Germany
MT|BA.2|EPI_ISL_16940242|2023-02-03|Germany	BA.2	EPI_ISL_16940242	2023-02-03	Germany
MT|BA.2|EPI_ISL_17281101|2023-02-03|Sweden	BA.2	EPI_ISL_17281101	2023-02-03	Sweden
MT|BA.2|EPI_ISL_17661876|2023-02-04|India	BA.2	EPI_ISL_17661876	2023-02-04	India
MT|BA.2|EPI_ISL_16944924|2023-02-05|USA	BA.2	EPI_ISL_16944924	2023-02-05	USA
MT|BA.2|EPI_ISL_17476438|2023-02-05|USA	BA.2	EPI_ISL_17476438	2023-02-05	USA
MT|BA.2|EPI_ISL_17003803|2023-02-08|Germany	BA.2	EPI_ISL_17003803	2023-02-08	Germany
MT|BA.2|EPI_ISL_17003777|2023-02-09|Germany	BA.2	EPI_ISL_17003777	2023-02-09	Germany
MT|BA.2|EPI_ISL_17003857|2023-02-09|Germany	BA.2	EPI_ISL_17003857	2023-02-09	Germany
MT|BA.2|EPI_ISL_17005077|2023-02-10|Germany	BA.2	EPI_ISL_17005077	2023-02-10	Germany
MT|BA.2|EPI_ISL_17033832|2023-02-14|Spain	BA.2	EPI_ISL_17033832	2023-02-14	Spain
MT|BA.2|EPI_ISL_16977140|2023-02-15|Austria	BA.2	EPI_ISL_16977140	2023-02-15	Austria
MT|BA.2|EPI_ISL_17004926|2023-02-15|Germany	BA.2	EPI_ISL_17004926	2023-02-15	Germany
MT|BA.2|EPI_ISL_17004997|2023-02-15|Germany	BA.2	EPI_ISL_17004997	2023-02-15	Germany
MT|BA.2|EPI_ISL_17080896|2023-02-16|Poland	BA.2	EPI_ISL_17080896	2023-02-16	Poland
MT|BA.2|EPI_ISL_18134408|2023-02-16|Sweden	BA.2	EPI_ISL_18134408	2023-02-16	Sweden
MT|BA.2|EPI_ISL_17070098|2023-02-18|Germany	BA.2	EPI_ISL_17070098	2023-02-18	Germany
MT|BA.2|EPI_ISL_17175569|2023-02-20|Germany	BA.2	EPI_ISL_17175569	2023-02-20	Germany
MT|BA.2|EPI_ISL_17211526|2023-02-21|USA	BA.2	EPI_ISL_17211526	2023-02-21	USA
MT|BA.2|EPI_ISL_17155702|2023-02-22|Ireland	BA.2	EPI_ISL_17155702	2023-02-22	Ireland
MT|BA.2|EPI_ISL_17183440|2023-02-22|USA	BA.2	EPI_ISL_17183440	2023-02-22	USA
MT|BA.2|EPI_ISL_17256250|2023-02-27|Germany	BA.2	EPI_ISL_17256250	2023-02-27	Germany
MT|BA.2|EPI_ISL_17258201|2023-02-27|Italy	BA.2	EPI_ISL_17258201	2023-02-27	Italy
MT|BA.2|EPI_ISL_17255807|2023-02-28|Germany	BA.2	EPI_ISL_17255807	2023-02-28	Germany
MT|BA.2|EPI_ISL_17255840|2023-02-28|Germany	BA.2	EPI_ISL_17255840	2023-02-28	Germany
MT|BA.2|EPI_ISL_17256234|2023-02-28|Germany	BA.2	EPI_ISL_17256234	2023-02-28	Germany
BG|XBB.1.5|EPI_ISL_17187033|2023-03-03|Italy	XBB.1.5	EPI_ISL_17187033	2023-03-03	Italy
BG|BA.2.75|EPI_ISL_17256239|2023-03-03|Germany	BA.2.75	EPI_ISL_17256239	2023-03-03	Germany
MT|BA.2|EPI_ISL_17256261|2023-03-03|Germany	BA.2	EPI_ISL_17256261	2023-03-03	Germany
MT|BA.2|EPI_ISL_17204448|2023-03-04|Belgium	BA.2	EPI_ISL_17204448	2023-03-04	Belgium
BG|BA.2.75|EPI_ISL_17188855|2023-03-05|Italy	BA.2.75	EPI_ISL_17188855	2023-03-05	Italy
BG|BA.2.75|EPI_ISL_17256247|2023-03-06|Germany	BA.2.75	EPI_ISL_17256247	2023-03-06	Germany
BG|BA.2.75|EPI_ISL_17266708|2023-03-06|Poland	BA.2.75	EPI_ISL_17266708	2023-03-06	Poland
BG|BA.2.75|EPI_ISL_17266711|2023-03-06|Poland	BA.2.75	EPI_ISL_17266711	2023-03-06	Poland
BG|BA.2.75|EPI_ISL_17242733|2023-03-07|Portugal	BA.2.75	EPI_ISL_17242733	2023-03-07	Portugal
MT|BA.2|EPI_ISL_17275956|2023-03-08|Spain	BA.2	EPI_ISL_17275956	2023-03-08	Spain
BG|BA.2.75|EPI_ISL_17494488|2023-03-10|China	BA.2.75	EPI_ISL_17494488	2023-03-10	China
BG|BA.2.75|EPI_ISL_17257582|2023-03-11|Italy	BA.2.75	EPI_ISL_17257582	2023-03-11	Italy
MT|BA.2|EPI_ISL_17372222|2023-03-12|India	BA.2	EPI_ISL_17372222	2023-03-12	India
MT|BA.2|EPI_ISL_18289393|2023-03-14|USA	BA.2	EPI_ISL_18289393	2023-03-14	USA
BG|BA.2.75|EPI_ISL_17415098|2023-03-17|South_Korea	BA.2.75	EPI_ISL_17415098	2023-03-17	South_Korea
BG|BA.2.75|EPI_ISL_17285430|2023-03-18|Italy	BA.2.75	EPI_ISL_17285430	2023-03-18	Italy
BG|BA.2.75|EPI_ISL_17285431|2023-03-18|Italy	BA.2.75	EPI_ISL_17285431	2023-03-18	Italy
BG|BA.2.75|EPI_ISL_17285434|2023-03-18|Italy	BA.2.75	EPI_ISL_17285434	2023-03-18	Italy
MT|BA.2|EPI_ISL_17582830|2023-03-19|Belgium	BA.2	EPI_ISL_17582830	2023-03-19	Belgium
MT|BA.2|EPI_ISL_17541190|2023-03-20|India	BA.2	EPI_ISL_17541190	2023-03-20	India
BG|BA.2|EPI_ISL_17482608|2023-03-21|Spain	BA.2	EPI_ISL_17482608	2023-03-21	Spain
BG|BA.2.75|EPI_ISL_17518818|2023-03-21|Germany	BA.2.75	EPI_ISL_17518818	2023-03-21	Germany
MT|BA.2|EPI_ISL_17399266|2023-03-22|Ireland	BA.2	EPI_ISL_17399266	2023-03-22	Ireland
MT|BA.2|EPI_ISL_17399290|2023-03-22|Ireland	BA.2	EPI_ISL_17399290	2023-03-22	Ireland
MT|BA.2|EPI_ISL_17474243|2023-03-22|South_Korea	BA.2	EPI_ISL_17474243	2023-03-22	South_Korea
MT|BA.2|EPI_ISL_17415432|2023-03-24|Ireland	BA.2	EPI_ISL_17415432	2023-03-24	Ireland
BG|BA.2.75|EPI_ISL_17433832|2023-03-24|Germany	BA.2.75	EPI_ISL_17433832	2023-03-24	Germany
MT|BA.2|EPI_ISL_17523266|2023-03-28|USA	BA.2	EPI_ISL_17523266	2023-03-28	USA
BG|BA.2.75|EPI_ISL_17538417|2023-03-28|South_Korea	BA.2.75	EPI_ISL_17538417	2023-03-28	South_Korea
MT|BA.2|EPI_ISL_18405783|2023-03-28|Saudi_Arabia	BA.2	EPI_ISL_18405783	2023-03-28	Saudi_Arabia
BG|BA.2.75|EPI_ISL_17538658|2023-03-29|South_Korea	BA.2.75	EPI_ISL_17538658	2023-03-29	South_Korea
MT|BA.2|EPI_ISL_17538685|2023-03-29|South_Korea	BA.2	EPI_ISL_17538685	2023-03-29	South_Korea
MT|BA.2|EPI_ISL_17613068|2023-03-29|Germany	BA.2	EPI_ISL_17613068	2023-03-29	Germany
BG|BA.2.75|EPI_ISL_17428340|2023-03-31|USA	BA.2.75	EPI_ISL_17428340	2023-03-31	USA
MT|BA.2|EPI_ISL_17521622|2023-03-31|Spain	BA.2	EPI_ISL_17521622	2023-03-31	Spain
MT|BA.2|EPI_ISL_17540695|2023-03-31|India	BA.2	EPI_ISL_17540695	2023-03-31	India
BG|BA.2.75|EPI_ISL_17558881|2023-04-03|Ukraine	BA.2.75	EPI_ISL_17558881	2023-04-03	Ukraine
BG|BA.2.75|EPI_ISL_17592538|2023-04-05|Portugal	BA.2.75	EPI_ISL_17592538	2023-04-05	Portugal
BG|BA.2.75|EPI_ISL_17526263|2023-04-08|Italy	BA.2.75	EPI_ISL_17526263	2023-04-08	Italy
MT|BA.2|EPI_ISL_17722379|2023-04-10|Malaysia	BA.2	EPI_ISL_17722379	2023-04-10	Malaysia
MT|BA.2|EPI_ISL_17736259|2023-04-10|Russia	BA.2	EPI_ISL_17736259	2023-04-10	Russia
MT|BA.2|EPI_ISL_17736261|2023-04-10|Russia	BA.2	EPI_ISL_17736261	2023-04-10	Russia
MT|BA.2|EPI_ISL_17736263|2023-04-10|Russia	BA.2	EPI_ISL_17736263	2023-04-10	Russia
MT|BA.2|EPI_ISL_17736264|2023-04-10|Russia	BA.2	EPI_ISL_17736264	2023-04-10	Russia
MT|BA.2|EPI_ISL_17503828|2023-04-11|Spain	BA.2	EPI_ISL_17503828	2023-04-11	Spain
BG|BA.2|EPI_ISL_17583263|2023-04-11|Ukraine	BA.2	EPI_ISL_17583263	2023-04-11	Ukraine
BG|BA.2|EPI_ISL_17509034|2023-04-14|Malaysia	BA.2	EPI_ISL_17509034	2023-04-14	Malaysia
MT|BA.2|EPI_ISL_17679253|2023-04-17|Spain	BA.2	EPI_ISL_17679253	2023-04-17	Spain
MT|BA.2|EPI_ISL_17717659|2023-04-20|India	BA.2	EPI_ISL_17717659	2023-04-20	India
MT|BA.2|EPI_ISL_17717696|2023-04-22|India	BA.2	EPI_ISL_17717696	2023-04-22	India
BG|BA.2.75|EPI_ISL_17691534|2023-04-30|South_Korea	BA.2.75	EPI_ISL_17691534	2023-04-30	South_Korea
MT|BA.2|EPI_ISL_17775563|2023-05-04|Xinjiang	BA.2	EPI_ISL_17775563	2023-05-04	Xinjiang
MT|BA.2|EPI_ISL_18115583|2023-05-07|Egypt	BA.2	EPI_ISL_18115583	2023-05-07	Egypt
MT|BA.2|EPI_ISL_18168238|2023-05-07|Belgium	BA.2	EPI_ISL_18168238	2023-05-07	Belgium
BG|BA.2|EPI_ISL_17738950|2023-05-09|New_Zealand	BA.2	EPI_ISL_17738950	2023-05-09	New_Zealand
MT|BA.2|EPI_ISL_17797250|2023-05-10|Indonesia	BA.2	EPI_ISL_17797250	2023-05-10	Indonesia
MT|BA.2|EPI_ISL_17809237|2023-05-22|Sweden	BA.2	EPI_ISL_17809237	2023-05-22	Sweden
MT|BA.2|EPI_ISL_18035170|2023-05-22|Guangdong	BA.2	EPI_ISL_18035170	2023-05-22	Guangdong
MT|BA.2|EPI_ISL_17812750|2023-06-06|Spain	BA.2	EPI_ISL_17812750	2023-06-06	Spain
MT|BA.2|EPI_ISL_17812758|2023-06-07|Spain	BA.2	EPI_ISL_17812758	2023-06-07	Spain
BG|XBB.1.5.73|EPI_ISL_17971959|2023-07-01|USA	XBB.1.5.73	EPI_ISL_17971959	2023-07-01	USA
BG|XBB.1.5.77|EPI_ISL_17973385|2023-07-01|Israel	XBB.1.5.77	EPI_ISL_17973385	2023-07-01	Israel
BG|XBB.1.5|EPI_ISL_17977995|2023-07-01|Canada	XBB.1.5	EPI_ISL_17977995	2023-07-01	Canada
BG|XBB.1.5|EPI_ISL_17982113|2023-07-01|Japan	XBB.1.5	EPI_ISL_17982113	2023-07-01	Japan
BG|XBB.1.5|EPI_ISL_17985480|2023-07-01|USA	XBB.1.5	EPI_ISL_17985480	2023-07-01	USA
BG|XBB.1.5|EPI_ISL_17987507|2023-07-01|China	XBB.1.5	EPI_ISL_17987507	2023-07-01	China
BG|XBB.1.5|EPI_ISL_17989797|2023-07-01|United_Kingdom	XBB.1.5	EPI_ISL_17989797	2023-07-01	United_Kingdom
BG|XBB.1.5|EPI_ISL_17990409|2023-07-01|Canada	XBB.1.5	EPI_ISL_17990409	2023-07-01	Canada
BG|XBB.1.5|EPI_ISL_17990418|2023-07-01|Canada	XBB.1.5	EPI_ISL_17990418	2023-07-01	Canada
BG|XBB.1.5.73|EPI_ISL_17990540|2023-07-01|Canada	XBB.1.5.73	EPI_ISL_17990540	2023-07-01	Canada
BG|XBB.1.5|EPI_ISL_17994800|2023-07-01|Finland	XBB.1.5	EPI_ISL_17994800	2023-07-01	Finland
BG|XBB.1.5|EPI_ISL_18000666|2023-07-01|Spain	XBB.1.5	EPI_ISL_18000666	2023-07-01	Spain
BG|XBB.1.5|EPI_ISL_18005343|2023-07-01|USA	XBB.1.5	EPI_ISL_18005343	2023-07-01	USA
BG|XBB.1.5|EPI_ISL_18008253|2023-07-01|Sweden	XBB.1.5	EPI_ISL_18008253	2023-07-01	Sweden
BG|XBB.1.5.97|EPI_ISL_18012238|2023-07-01|Australia	XBB.1.5.97	EPI_ISL_18012238	2023-07-01	Australia
BG|XBB.1.5|EPI_ISL_18015817|2023-07-01|Canary_Islands	XBB.1.5	EPI_ISL_18015817	2023-07-01	Canary_Islands
BG|XBB.1.33|EPI_ISL_18032333|2023-07-01|Netherlands	XBB.1.33	EPI_ISL_18032333	2023-07-01	Netherlands
BG|XBB.1.5|EPI_ISL_18032437|2023-07-01|Australia	XBB.1.5	EPI_ISL_18032437	2023-07-01	Australia
BG|XBB.1.5|EPI_ISL_18036760|2023-07-01|China	XBB.1.5	EPI_ISL_18036760	2023-07-01	China
BG|XBB.1.5|EPI_ISL_18036766|2023-07-01|China	XBB.1.5	EPI_ISL_18036766	2023-07-01	China
BG|XBB.1.5|EPI_ISL_18037778|2023-07-01|USA	XBB.1.5	EPI_ISL_18037778	2023-07-01	USA
BG|XBB.1.5.72|EPI_ISL_18038608|2023-07-01|USA	XBB.1.5.72	EPI_ISL_18038608	2023-07-01	USA
BG|XBB.1.5.73|EPI_ISL_18043417|2023-07-01|Peru	XBB.1.5.73	EPI_ISL_18043417	2023-07-01	Peru
BG|XBB.1.5.75|EPI_ISL_18043425|2023-07-01|Peru	XBB.1.5.75	EPI_ISL_18043425	2023-07-01	Peru
BG|XBB.1.5|EPI_ISL_18044063|2023-07-01|Japan	XBB.1.5	EPI_ISL_18044063	2023-07-01	Japan
BG|XBB.1.5|EPI_ISL_18045120|2023-07-01|Canada	XBB.1.5	EPI_ISL_18045120	2023-07-01	Canada
BG|XBB.1.5.72|EPI_ISL_18045125|2023-07-01|Canada	XBB.1.5.72	EPI_ISL_18045125	2023-07-01	Canada
BG|XBB.1.5|EPI_ISL_18045161|2023-07-01|Canada	XBB.1.5	EPI_ISL_18045161	2023-07-01	Canada
BG|XBB.1.5|EPI_ISL_18045347|2023-07-01|USA	XBB.1.5	EPI_ISL_18045347	2023-07-01	USA
BG|XBB.1.5|EPI_ISL_18045787|2023-07-01|USA	XBB.1.5	EPI_ISL_18045787	2023-07-01	USA
BG|XBB.1.5.95|EPI_ISL_18046119|2023-07-01|USA	XBB.1.5.95	EPI_ISL_18046119	2023-07-01	USA
BG|XBB.1.5|EPI_ISL_18050249|2023-07-01|USA	XBB.1.5	EPI_ISL_18050249	2023-07-01	USA
BG|XBB.1.5|EPI_ISL_18057357|2023-07-01|USA	XBB.1.5	EPI_ISL_18057357	2023-07-01	USA
BG|XBB.1.5.77|EPI_ISL_18057492|2023-07-01|USA	XBB.1.5.77	EPI_ISL_18057492	2023-07-01	USA
BG|XBB.1.5.92|EPI_ISL_18057501|2023-07-01|USA	XBB.1.5.92	EPI_ISL_18057501	2023-07-01	USA
BG|XBB.1.5|EPI_ISL_18059163|2023-07-01|Spain	XBB.1.5	EPI_ISL_18059163	2023-07-01	Spain
BG|XBB.1.5.72|EPI_ISL_18071323|2023-07-01|USA	XBB.1.5.72	EPI_ISL_18071323	2023-07-01	USA
BG|XBB.1.5.77|EPI_ISL_18071326|2023-07-01|USA	XBB.1.5.77	EPI_ISL_18071326	2023-07-01	USA
BG|XBB.1.5.73|EPI_ISL_18071327|2023-07-01|USA	XBB.1.5.73	EPI_ISL_18071327	2023-07-01	USA
BG|XBB.1.5|EPI_ISL_18071487|2023-07-01|Costa_Rica	XBB.1.5	EPI_ISL_18071487	2023-07-01	Costa_Rica
BG|XBB.1.5|EPI_ISL_18071488|2023-07-01|Costa_Rica	XBB.1.5	EPI_ISL_18071488	2023-07-01	Costa_Rica
BG|XBB.1.5.77|EPI_ISL_18071804|2023-07-01|Colombia	XBB.1.5.77	EPI_ISL_18071804	2023-07-01	Colombia
BG|XBB.1.5.72|EPI_ISL_18071849|2023-07-01|Colombia	XBB.1.5.72	EPI_ISL_18071849	2023-07-01	Colombia
BG|XBB.1.5.72|EPI_ISL_18071850|2023-07-01|Colombia	XBB.1.5.72	EPI_ISL_18071850	2023-07-01	Colombia
BG|XBB.1.5|EPI_ISL_18073866|2023-07-01|USA	XBB.1.5	EPI_ISL_18073866	2023-07-01	USA
BG|XBB.1.5.106|EPI_ISL_18075270|2023-07-01|USA	XBB.1.5.106	EPI_ISL_18075270	2023-07-01	USA
BG|XBB.1.5|EPI_ISL_18077150|2023-07-01|USA	XBB.1.5	EPI_ISL_18077150	2023-07-01	USA
BG|XBB.1.5|EPI_ISL_18080993|2023-07-01|USA	XBB.1.5	EPI_ISL_18080993	2023-07-01	USA
BG|XBB.1.5|EPI_ISL_18081052|2023-07-01|USA	XBB.1.5	EPI_ISL_18081052	2023-07-01	USA
BG|XBB.1.5|EPI_ISL_18081363|2023-07-01|USA	XBB.1.5	EPI_ISL_18081363	2023-07-01	USA
BG|XBB.1.5|EPI_ISL_18082479|2023-07-01|Singapore	XBB.1.5	EPI_ISL_18082479	2023-07-01	Singapore
BG|XBB.1.5|EPI_ISL_18094540|2023-07-01|France	XBB.1.5	EPI_ISL_18094540	2023-07-01	France
BG|XBB.1.5|EPI_ISL_18096893|2023-07-01|Canary_Islands	XBB.1.5	EPI_ISL_18096893	2023-07-01	Canary_Islands
BG|XBB.1.5|EPI_ISL_18100921|2023-07-01|Japan	XBB.1.5	EPI_ISL_18100921	2023-07-01	Japan
BG|XBB.1.5.86|EPI_ISL_18101639|2023-07-01|Argentina	XBB.1.5.86	EPI_ISL_18101639	2023-07-01	Argentina
BG|XBB.1.5|EPI_ISL_18110709|2023-07-01|USA	XBB.1.5	EPI_ISL_18110709	2023-07-01	USA
BG|XBB.1.5|EPI_ISL_18112529|2023-07-01|Spain	XBB.1.5	EPI_ISL_18112529	2023-07-01	Spain
BG|XBB.1.5|EPI_ISL_18113376|2023-07-01|USA	XBB.1.5	EPI_ISL_18113376	2023-07-01	USA
BG|XBB.1.5.72|EPI_ISL_18113490|2023-07-01|Spain	XBB.1.5.72	EPI_ISL_18113490	2023-07-01	Spain
BG|XBB.1.5|EPI_ISL_18114395|2023-07-01|USA	XBB.1.5	EPI_ISL_18114395	2023-07-01	USA
BG|XBB.1.5.72|EPI_ISL_18114397|2023-07-01|USA	XBB.1.5.72	EPI_ISL_18114397	2023-07-01	USA
BG|XBB.1.5|EPI_ISL_17978557|2023-07-02|China	XBB.1.5	EPI_ISL_17978557	2023-07-02	China
BG|XBB.1.5.95|EPI_ISL_17979330|2023-07-02|USA	XBB.1.5.95	EPI_ISL_17979330	2023-07-02	USA
BG|XBB.1.5|EPI_ISL_17990548|2023-07-02|Canada	XBB.1.5	EPI_ISL_17990548	2023-07-02	Canada
BG|XBB.1.5|EPI_ISL_17996259|2023-07-02|USA	XBB.1.5	EPI_ISL_17996259	2023-07-02	USA
BG|XBB.1.5.73|EPI_ISL_17996262|2023-07-02|USA	XBB.1.5.73	EPI_ISL_17996262	2023-07-02	USA
BG|XBB.1.5|EPI_ISL_17998587|2023-07-02|USA	XBB.1.5	EPI_ISL_17998587	2023-07-02	USA
BG|XBB.1.5|EPI_ISL_18001835|2023-07-02|Canada	XBB.1.5	EPI_ISL_18001835	2023-07-02	Canada
BG|XBB.1.5|EPI_ISL_18001841|2023-07-02|Canada	XBB.1.5	EPI_ISL_18001841	2023-07-02	Canada
BG|XBB.1.5|EPI_ISL_18001881|2023-07-02|Canada	XBB.1.5	EPI_ISL_18001881	2023-07-02	Canada
BG|XBB.1.5|EPI_ISL_18015593|2023-07-02|United_Kingdom	XBB.1.5	EPI_ISL_18015593	2023-07-02	United_Kingdom
BG|XBB.1.5|EPI_ISL_18030088|2023-07-02|Canada	XBB.1.5	EPI_ISL_18030088	2023-07-02	Canada
BG|XBB.1.5|EPI_ISL_18034876|2023-07-02|China	XBB.1.5	EPI_ISL_18034876	2023-07-02	China
BG|XBB.1.5|EPI_ISL_18041923|2023-07-02|Sweden	XBB.1.5	EPI_ISL_18041923	2023-07-02	Sweden
BG|XBB.1.5.73|EPI_ISL_18043428|2023-07-02|Peru	XBB.1.5.73	EPI_ISL_18043428	2023-07-02	Peru
BG|XBB.1.5.73|EPI_ISL_18043430|2023-07-02|Peru	XBB.1.5.73	EPI_ISL_18043430	2023-07-02	Peru
BG|XBB.1.5.72|EPI_ISL_18045043|2023-07-02|USA	XBB.1.5.72	EPI_ISL_18045043	2023-07-02	USA
BG|XBB.1.5|EPI_ISL_18045324|2023-07-02|USA	XBB.1.5	EPI_ISL_18045324	2023-07-02	USA
BG|XBB.1.5.72|EPI_ISL_18045596|2023-07-02|USA	XBB.1.5.72	EPI_ISL_18045596	2023-07-02	USA
BG|XBB.1.5|EPI_ISL_18046095|2023-07-02|USA	XBB.1.5	EPI_ISL_18046095	2023-07-02	USA
BG|XBB.1.5|EPI_ISL_18046283|2023-07-02|USA	XBB.1.5	EPI_ISL_18046283	2023-07-02	USA
BG|XBB.1.5|EPI_ISL_18057641|2023-07-02|USA	XBB.1.5	EPI_ISL_18057641	2023-07-02	USA
BG|XBB.1.5|EPI_ISL_18060463|2023-07-02|USA	XBB.1.5	EPI_ISL_18060463	2023-07-02	USA
BG|XBB.1.5|EPI_ISL_18066497|2023-07-02|Japan	XBB.1.5	EPI_ISL_18066497	2023-07-02	Japan
BG|XBB.1.5|EPI_ISL_18071485|2023-07-02|Costa_Rica	XBB.1.5	EPI_ISL_18071485	2023-07-02	Costa_Rica
BG|XBB.1.5.77|EPI_ISL_18071802|2023-07-02|Colombia	XBB.1.5.77	EPI_ISL_18071802	2023-07-02	Colombia
BG|XBB.1.5|EPI_ISL_18073869|2023-07-02|USA	XBB.1.5	EPI_ISL_18073869	2023-07-02	USA
BG|XBB.1.5|EPI_ISL_18080757|2023-07-02|USA	XBB.1.5	EPI_ISL_18080757	2023-07-02	USA
BG|XBB.1.5|EPI_ISL_18080973|2023-07-02|USA	XBB.1.5	EPI_ISL_18080973	2023-07-02	USA
BG|XBB.1.5.103|EPI_ISL_18095189|2023-07-02|Argentina	XBB.1.5.103	EPI_ISL_18095189	2023-07-02	Argentina
BG|XBB.1.44.1|EPI_ISL_18100635|2023-07-02|Japan	XBB.1.44.1	EPI_ISL_18100635	2023-07-02	Japan
BG|XBB.1.5.73|EPI_ISL_17977848|2023-07-03|Canada	XBB.1.5.73	EPI_ISL_17977848	2023-07-03	Canada
BG|XBB.1.5.104|EPI_ISL_17978967|2023-07-03|USA	XBB.1.5.104	EPI_ISL_17978967	2023-07-03	USA
BG|XBB.1.5.72|EPI_ISL_17980590|2023-07-03|Iceland	XBB.1.5.72	EPI_ISL_17980590	2023-07-03	Iceland
BG|XBB.1.5.72|EPI_ISL_17985072|2023-07-03|Australia	XBB.1.5.72	EPI_ISL_17985072	2023-07-03	Australia
BG|XBB.1.5|EPI_ISL_17985105|2023-07-03|Spain	XBB.1.5	EPI_ISL_17985105	2023-07-03	Spain
BG|XBB.1.5.77|EPI_ISL_17985463|2023-07-03|USA	XBB.1.5.77	EPI_ISL_17985463	2023-07-03	USA
BG|XBB.1.5.77|EPI_ISL_17986697|2023-07-03|USA	XBB.1.5.77	EPI_ISL_17986697	2023-07-03	USA
BG|XBB.1.5.89|EPI_ISL_17990396|2023-07-03|Canada	XBB.1.5.89	EPI_ISL_17990396	2023-07-03	Canada
BG|XBB.1.5|EPI_ISL_17990481|2023-07-03|Canada	XBB.1.5	EPI_ISL_17990481	2023-07-03	Canada
BG|XBB.1.5|EPI_ISL_17990484|2023-07-03|Canada	XBB.1.5	EPI_ISL_17990484	2023-07-03	Canada
BG|XBB.1.5.73|EPI_ISL_17993964|2023-07-03|Canada	XBB.1.5.73	EPI_ISL_17993964	2023-07-03	Canada
BG|XBB.1|EPI_ISL_17994130|2023-07-03|USA	XBB.1	EPI_ISL_17994130	2023-07-03	USA
BG|XBB.1.5|EPI_ISL_17994140|2023-07-03|Mexico	XBB.1.5	EPI_ISL_17994140	2023-07-03	Mexico
BG|XBB.1.5|EPI_ISL_17994828|2023-07-03|Finland	XBB.1.5	EPI_ISL_17994828	2023-07-03	Finland
BG|XBB.1.5|EPI_ISL_17995484|2023-07-03|Denmark	XBB.1.5	EPI_ISL_17995484	2023-07-03	Denmark
BG|XBB.1.5|EPI_ISL_17995491|2023-07-03|Denmark	XBB.1.5	EPI_ISL_17995491	2023-07-03	Denmark
BG|XBB.1.5.104|EPI_ISL_17996271|2023-07-03|USA	XBB.1.5.104	EPI_ISL_17996271	2023-07-03	USA
BG|XBB.1.5.72|EPI_ISL_17996281|2023-07-03|USA	XBB.1.5.72	EPI_ISL_17996281	2023-07-03	USA
BG|XBB.1.5|EPI_ISL_17998601|2023-07-03|USA	XBB.1.5	EPI_ISL_17998601	2023-07-03	USA
BG|XBB.1.5|EPI_ISL_17998608|2023-07-03|USA	XBB.1.5	EPI_ISL_17998608	2023-07-03	USA
BG|XBB.1.5|EPI_ISL_17998609|2023-07-03|USA	XBB.1.5	EPI_ISL_17998609	2023-07-03	USA
BG|XBB.1.5|EPI_ISL_18000549|2023-07-03|Japan	XBB.1.5	EPI_ISL_18000549	2023-07-03	Japan
BG|XBB.1.5|EPI_ISL_18001851|2023-07-03|Canada	XBB.1.5	EPI_ISL_18001851	2023-07-03	Canada
BG|XBB.1.5|EPI_ISL_18001880|2023-07-03|Canada	XBB.1.5	EPI_ISL_18001880	2023-07-03	Canada
BG|XBB.1.5.94|EPI_ISL_18001882|2023-07-03|Canada	XBB.1.5.94	EPI_ISL_18001882	2023-07-03	Canada
BG|XBB.1.5.95|EPI_ISL_18001887|2023-07-03|Canada	XBB.1.5.95	EPI_ISL_18001887	2023-07-03	Canada
BG|XBB.1.5|EPI_ISL_18005358|2023-07-03|USA	XBB.1.5	EPI_ISL_18005358	2023-07-03	USA
BG|XBB.1.5.73|EPI_ISL_18005368|2023-07-03|USA	XBB.1.5.73	EPI_ISL_18005368	2023-07-03	USA
BG|XBB.1.5|EPI_ISL_18006671|2023-07-03|Japan	XBB.1.5	EPI_ISL_18006671	2023-07-03	Japan
BG|XBB.1.5|EPI_ISL_18006715|2023-07-03|Japan	XBB.1.5	EPI_ISL_18006715	2023-07-03	Japan
BG|XBB.1.5|EPI_ISL_18010083|2023-07-03|France	XBB.1.5	EPI_ISL_18010083	2023-07-03	France
BG|XBB.1.5|EPI_ISL_18010087|2023-07-03|France	XBB.1.5	EPI_ISL_18010087	2023-07-03	France
BG|XBB.1.5|EPI_ISL_18010088|2023-07-03|France	XBB.1.5	EPI_ISL_18010088	2023-07-03	France
BG|XBB.1.5|EPI_ISL_18010089|2023-07-03|France	XBB.1.5	EPI_ISL_18010089	2023-07-03	France
BG|XBB.1.5|EPI_ISL_18010132|2023-07-03|France	XBB.1.5	EPI_ISL_18010132	2023-07-03	France
BG|XBB.1.5|EPI_ISL_18010387|2023-07-03|Spain	XBB.1.5	EPI_ISL_18010387	2023-07-03	Spain
BG|XBB.1.5|EPI_ISL_18015573|2023-07-03|United_Kingdom	XBB.1.5	EPI_ISL_18015573	2023-07-03	United_Kingdom
BG|XBB.1.5.77|EPI_ISL_18022477|2023-07-03|USA	XBB.1.5.77	EPI_ISL_18022477	2023-07-03	USA
BG|XBB.1.5|EPI_ISL_18022481|2023-07-03|USA	XBB.1.5	EPI_ISL_18022481	2023-07-03	USA
BG|XBB.1.5|EPI_ISL_18022526|2023-07-03|USA	XBB.1.5	EPI_ISL_18022526	2023-07-03	USA
BG|XBB.1.5.72|EPI_ISL_18022549|2023-07-03|USA	XBB.1.5.72	EPI_ISL_18022549	2023-07-03	USA
BG|XBB.1.5.72|EPI_ISL_18022562|2023-07-03|USA	XBB.1.5.72	EPI_ISL_18022562	2023-07-03	USA
BG|XBB.1.5|EPI_ISL_18022568|2023-07-03|USA	XBB.1.5	EPI_ISL_18022568	2023-07-03	USA
BG|XBB.1.5.72|EPI_ISL_18022579|2023-07-03|USA	XBB.1.5.72	EPI_ISL_18022579	2023-07-03	USA
BG|XBB.1.5|EPI_ISL_18028419|2023-07-03|USA	XBB.1.5	EPI_ISL_18028419	2023-07-03	USA
BG|XBB.1.5.90|EPI_ISL_18033115|2023-07-03|Japan	XBB.1.5.90	EPI_ISL_18033115	2023-07-03	Japan
BG|XBB.1.5|EPI_ISL_18037105|2023-07-03|Canada	XBB.1.5	EPI_ISL_18037105	2023-07-03	Canada
BG|XBB.1.5|EPI_ISL_18037168|2023-07-03|Canada	XBB.1.5	EPI_ISL_18037168	2023-07-03	Canada
BG|XBB.1.5|EPI_ISL_18037772|2023-07-03|USA	XBB.1.5	EPI_ISL_18037772	2023-07-03	USA
BG|XBB.1.5.72|EPI_ISL_18037783|2023-07-03|USA	XBB.1.5.72	EPI_ISL_18037783	2023-07-03	USA
BG|XBB.1.5.72|EPI_ISL_18038413|2023-07-03|Dominican_Republic	XBB.1.5.72	EPI_ISL_18038413	2023-07-03	Dominican_Republic
BG|XBB.1.5|EPI_ISL_18039102|2023-07-03|South_Korea	XBB.1.5	EPI_ISL_18039102	2023-07-03	South_Korea
BG|XBB.1.5.77|EPI_ISL_18040123|2023-07-03|USA	XBB.1.5.77	EPI_ISL_18040123	2023-07-03	USA
BG|XBB.1.5|EPI_ISL_18040428|2023-07-03|Japan	XBB.1.5	EPI_ISL_18040428	2023-07-03	Japan
BG|XBB.1.5|EPI_ISL_18040437|2023-07-03|Japan	XBB.1.5	EPI_ISL_18040437	2023-07-03	Japan
BG|XBB.1.5|EPI_ISL_18043409|2023-07-03|Peru	XBB.1.5	EPI_ISL_18043409	2023-07-03	Peru
BG|XBB.1.5.72|EPI_ISL_18044035|2023-07-03|Spain	XBB.1.5.72	EPI_ISL_18044035	2023-07-03	Spain
BG|XBB.1.5|EPI_ISL_18044079|2023-07-03|Japan	XBB.1.5	EPI_ISL_18044079	2023-07-03	Japan
BG|XBB.1.5|EPI_ISL_18045062|2023-07-03|USA	XBB.1.5	EPI_ISL_18045062	2023-07-03	USA
BG|XBB.1.5|EPI_ISL_18045845|2023-07-03|USA	XBB.1.5	EPI_ISL_18045845	2023-07-03	USA
BG|XBB.1.5|EPI_ISL_18045877|2023-07-03|USA	XBB.1.5	EPI_ISL_18045877	2023-07-03	USA
BG|XBB.1.5.106|EPI_ISL_18046212|2023-07-03|USA	XBB.1.5.106	EPI_ISL_18046212	2023-07-03	USA
BG|XBB.1.5|EPI_ISL_18046313|2023-07-03|USA	XBB.1.5	EPI_ISL_18046313	2023-07-03	USA
BG|XBB.1.5|EPI_ISL_18047718|2023-07-03|Japan	XBB.1.5	EPI_ISL_18047718	2023-07-03	Japan
BG|XBB.1.5|EPI_ISL_18047719|2023-07-03|Japan	XBB.1.5	EPI_ISL_18047719	2023-07-03	Japan
BG|XBB.1.5|EPI_ISL_18049017|2023-07-03|France	XBB.1.5	EPI_ISL_18049017	2023-07-03	France
BG|XBB.1.5.78|EPI_ISL_18050254|2023-07-03|USA	XBB.1.5.78	EPI_ISL_18050254	2023-07-03	USA
BG|XBB.1.5|EPI_ISL_18052059|2023-07-03|Denmark	XBB.1.5	EPI_ISL_18052059	2023-07-03	Denmark
BG|XBB.1.5.76|EPI_ISL_18057464|2023-07-03|USA	XBB.1.5.76	EPI_ISL_18057464	2023-07-03	USA
BG|XBB.1.5|EPI_ISL_18057500|2023-07-03|USA	XBB.1.5	EPI_ISL_18057500	2023-07-03	USA
BG|XBB.1.5|EPI_ISL_18059983|2023-07-03|Puerto_Rico	XBB.1.5	EPI_ISL_18059983	2023-07-03	Puerto_Rico
BG|XBB.1.5|EPI_ISL_18059994|2023-07-03|Puerto_Rico	XBB.1.5	EPI_ISL_18059994	2023-07-03	Puerto_Rico
BG|XBB.1.5|EPI_ISL_18066275|2023-07-03|Japan	XBB.1.5	EPI_ISL_18066275	2023-07-03	Japan
BG|XBB.1.5|EPI_ISL_18069921|2023-07-03|USA	XBB.1.5	EPI_ISL_18069921	2023-07-03	USA
BG|XBB.1.5|EPI_ISL_18071492|2023-07-03|Costa_Rica	XBB.1.5	EPI_ISL_18071492	2023-07-03	Costa_Rica
BG|XBB.1.5|EPI_ISL_18071534|2023-07-03|Costa_Rica	XBB.1.5	EPI_ISL_18071534	2023-07-03	Costa_Rica
BG|XBB.1.5|EPI_ISL_18071543|2023-07-03|Costa_Rica	XBB.1.5	EPI_ISL_18071543	2023-07-03	Costa_Rica
BG|XBB.1.5|EPI_ISL_18071544|2023-07-03|Costa_Rica	XBB.1.5	EPI_ISL_18071544	2023-07-03	Costa_Rica
BG|XBB.1.5|EPI_ISL_18071547|2023-07-03|Costa_Rica	XBB.1.5	EPI_ISL_18071547	2023-07-03	Costa_Rica
BG|XBB.1.5.77|EPI_ISL_18071557|2023-07-03|Costa_Rica	XBB.1.5.77	EPI_ISL_18071557	2023-07-03	Costa_Rica
BG|XBB.1.5|EPI_ISL_18071558|2023-07-03|Costa_Rica	XBB.1.5	EPI_ISL_18071558	2023-07-03	Costa_Rica
BG|XBB.1.22|EPI_ISL_18072211|2023-07-03|Italy	XBB.1.22	EPI_ISL_18072211	2023-07-03	Italy
BG|XBB.1.5|EPI_ISL_18072212|2023-07-03|Italy	XBB.1.5	EPI_ISL_18072212	2023-07-03	Italy
BG|XBB.1.5|EPI_ISL_18072345|2023-07-03|USA	XBB.1.5	EPI_ISL_18072345	2023-07-03	USA
BG|XBB.1.5|EPI_ISL_18077773|2023-07-03|Japan	XBB.1.5	EPI_ISL_18077773	2023-07-03	Japan
BG|XBB.1.5|EPI_ISL_18080444|2023-07-03|USA	XBB.1.5	EPI_ISL_18080444	2023-07-03	USA
BG|XBB.1.5.34|EPI_ISL_18080593|2023-07-03|USA	XBB.1.5.34	EPI_ISL_18080593	2023-07-03	USA
BG|XBB.1.5|EPI_ISL_18080759|2023-07-03|USA	XBB.1.5	EPI_ISL_18080759	2023-07-03	USA
BG|XBB.1.5|EPI_ISL_18080960|2023-07-03|USA	XBB.1.5	EPI_ISL_18080960	2023-07-03	USA
BG|XBB.1.5.100|EPI_ISL_18081051|2023-07-03|USA	XBB.1.5.100	EPI_ISL_18081051	2023-07-03	USA
BG|XBB.1.5|EPI_ISL_18081055|2023-07-03|USA	XBB.1.5	EPI_ISL_18081055	2023-07-03	USA
BG|XBB.1.5|EPI_ISL_18095157|2023-07-03|Argentina	XBB.1.5	EPI_ISL_18095157	2023-07-03	Argentina
BG|XBB.1.5.103|EPI_ISL_18095353|2023-07-03|Argentina	XBB.1.5.103	EPI_ISL_18095353	2023-07-03	Argentina
BG|XBB.1.5|EPI_ISL_18097853|2023-07-03|Japan	XBB.1.5	EPI_ISL_18097853	2023-07-03	Japan
BG|XBB.1.5|EPI_ISL_18100927|2023-07-03|Japan	XBB.1.5	EPI_ISL_18100927	2023-07-03	Japan
BG|XBB.1.5|EPI_ISL_18101310|2023-07-03|Taiwan	XBB.1.5	EPI_ISL_18101310	2023-07-03	Taiwan
BG|XBB.1.5|EPI_ISL_18110162|2023-07-03|Costa_Rica	XBB.1.5	EPI_ISL_18110162	2023-07-03	Costa_Rica
BG|XBB.1.5|EPI_ISL_17977839|2023-07-04|Canada	XBB.1.5	EPI_ISL_17977839	2023-07-04	Canada
BG|XBB.1.5.73|EPI_ISL_17977846|2023-07-04|Canada	XBB.1.5.73	EPI_ISL_17977846	2023-07-04	Canada
BG|XBB.1.5.73|EPI_ISL_17977849|2023-07-04|Canada	XBB.1.5.73	EPI_ISL_17977849	2023-07-04	Canada
BG|XBB.1.5|EPI_ISL_17977867|2023-07-04|Canada	XBB.1.5	EPI_ISL_17977867	2023-07-04	Canada
BG|XBB.1.5|EPI_ISL_17985419|2023-07-04|USA	XBB.1.5	EPI_ISL_17985419	2023-07-04	USA
BG|XBB.1.5|EPI_ISL_17985454|2023-07-04|USA	XBB.1.5	EPI_ISL_17985454	2023-07-04	USA
BG|XBB.1.5|EPI_ISL_17985540|2023-07-04|USA	XBB.1.5	EPI_ISL_17985540	2023-07-04	USA
BG|XBB.1.5|EPI_ISL_17985553|2023-07-04|USA	XBB.1.5	EPI_ISL_17985553	2023-07-04	USA
BG|XBB.1.5.105|EPI_ISL_17986420|2023-07-04|Ireland	XBB.1.5.105	EPI_ISL_17986420	2023-07-04	Ireland
BG|XBB.1.5.72|EPI_ISL_17986693|2023-07-04|USA	XBB.1.5.72	EPI_ISL_17986693	2023-07-04	USA
BG|XBB.1.5|EPI_ISL_17990205|2023-07-04|Italy	XBB.1.5	EPI_ISL_17990205	2023-07-04	Italy
BG|XBB.1.5.72|EPI_ISL_17990207|2023-07-04|Italy	XBB.1.5.72	EPI_ISL_17990207	2023-07-04	Italy
BG|XBB.1.5|EPI_ISL_17990432|2023-07-04|Canada	XBB.1.5	EPI_ISL_17990432	2023-07-04	Canada
BG|XBB.1.5|EPI_ISL_17990443|2023-07-04|Canada	XBB.1.5	EPI_ISL_17990443	2023-07-04	Canada
BG|XBB.1.5|EPI_ISL_17990455|2023-07-04|Canada	XBB.1.5	EPI_ISL_17990455	2023-07-04	Canada
BG|XBB.1.5.73|EPI_ISL_17993965|2023-07-04|Canada	XBB.1.5.73	EPI_ISL_17993965	2023-07-04	Canada
BG|XBB.1.5.90|EPI_ISL_17994831|2023-07-04|Finland	XBB.1.5.90	EPI_ISL_17994831	2023-07-04	Finland
BG|XBB.1.5|EPI_ISL_17996290|2023-07-04|USA	XBB.1.5	EPI_ISL_17996290	2023-07-04	USA
BG|XBB.1.5.77|EPI_ISL_17998611|2023-07-04|USA	XBB.1.5.77	EPI_ISL_17998611	2023-07-04	USA
BG|XBB.1.5|EPI_ISL_17998613|2023-07-04|USA	XBB.1.5	EPI_ISL_17998613	2023-07-04	USA
BG|XBB.1.5.97|EPI_ISL_17998615|2023-07-04|USA	XBB.1.5.97	EPI_ISL_17998615	2023-07-04	USA
BG|XBB.1.5|EPI_ISL_18005373|2023-07-04|USA	XBB.1.5	EPI_ISL_18005373	2023-07-04	USA
BG|XBB.1.5|EPI_ISL_18005375|2023-07-04|USA	XBB.1.5	EPI_ISL_18005375	2023-07-04	USA
BG|XBB.1.5|EPI_ISL_18006637|2023-07-04|Japan	XBB.1.5	EPI_ISL_18006637	2023-07-04	Japan
BG|XBB.1.5|EPI_ISL_18012797|2023-07-04|USA	XBB.1.5	EPI_ISL_18012797	2023-07-04	USA
BG|XBB.1.5|EPI_ISL_18015637|2023-07-04|United_Kingdom	XBB.1.5	EPI_ISL_18015637	2023-07-04	United_Kingdom
BG|XBB.1.5|EPI_ISL_18015713|2023-07-04|United_Kingdom	XBB.1.5	EPI_ISL_18015713	2023-07-04	United_Kingdom
BG|XBB.1.5.72|EPI_ISL_18034057|2023-07-04|Switzerland	XBB.1.5.72	EPI_ISL_18034057	2023-07-04	Switzerland
BG|XBB.1.5.72|EPI_ISL_18034149|2023-07-04|Switzerland	XBB.1.5.72	EPI_ISL_18034149	2023-07-04	Switzerland
BG|XBB.1.5.96|EPI_ISL_18036857|2023-07-04|China	XBB.1.5.96	EPI_ISL_18036857	2023-07-04	China
BG|XBB.1.5|EPI_ISL_18037092|2023-07-04|Canada	XBB.1.5	EPI_ISL_18037092	2023-07-04	Canada
BG|XBB.1.5.105|EPI_ISL_18037187|2023-07-04|Canada	XBB.1.5.105	EPI_ISL_18037187	2023-07-04	Canada
BG|XBB.1.5.105|EPI_ISL_18037527|2023-07-04|USA	XBB.1.5.105	EPI_ISL_18037527	2023-07-04	USA
BG|XBB.1.5|EPI_ISL_18037788|2023-07-04|USA	XBB.1.5	EPI_ISL_18037788	2023-07-04	USA
BG|XBB.1.5|EPI_ISL_18038998|2023-07-04|South_Korea	XBB.1.5	EPI_ISL_18038998	2023-07-04	South_Korea
BG|XBB.1.5|EPI_ISL_18038999|2023-07-04|South_Korea	XBB.1.5	EPI_ISL_18038999	2023-07-04	South_Korea
BG|XBB.1.5|EPI_ISL_18039122|2023-07-04|South_Korea	XBB.1.5	EPI_ISL_18039122	2023-07-04	South_Korea
BG|XBB.1.5|EPI_ISL_18039536|2023-07-04|Japan	XBB.1.5	EPI_ISL_18039536	2023-07-04	Japan
BG|XBB.1.5|EPI_ISL_18040121|2023-07-04|USA	XBB.1.5	EPI_ISL_18040121	2023-07-04	USA
BG|XBB.1.5|EPI_ISL_18040325|2023-07-04|Japan	XBB.1.5	EPI_ISL_18040325	2023-07-04	Japan
BG|XBB.1.5|EPI_ISL_18045063|2023-07-04|USA	XBB.1.5	EPI_ISL_18045063	2023-07-04	USA
BG|XBB.1.5|EPI_ISL_18046205|2023-07-04|USA	XBB.1.5	EPI_ISL_18046205	2023-07-04	USA
BG|XBB.1.5|EPI_ISL_18046781|2023-07-04|South_Korea	XBB.1.5	EPI_ISL_18046781	2023-07-04	South_Korea
BG|XBB.1.5|EPI_ISL_18046857|2023-07-04|South_Korea	XBB.1.5	EPI_ISL_18046857	2023-07-04	South_Korea
BG|XBB.1.5|EPI_ISL_18046885|2023-07-04|South_Korea	XBB.1.5	EPI_ISL_18046885	2023-07-04	South_Korea
BG|XBB.1.5|EPI_ISL_18046937|2023-07-04|South_Korea	XBB.1.5	EPI_ISL_18046937	2023-07-04	South_Korea
BG|XBB.1.5|EPI_ISL_18046939|2023-07-04|South_Korea	XBB.1.5	EPI_ISL_18046939	2023-07-04	South_Korea
BG|XBB.1.5|EPI_ISL_18046940|2023-07-04|South_Korea	XBB.1.5	EPI_ISL_18046940	2023-07-04	South_Korea
BG|XBB.1.5|EPI_ISL_18046946|2023-07-04|South_Korea	XBB.1.5	EPI_ISL_18046946	2023-07-04	South_Korea
BG|XBB.1.5|EPI_ISL_18047008|2023-07-04|South_Korea	XBB.1.5	EPI_ISL_18047008	2023-07-04	South_Korea
BG|XBB.1.5|EPI_ISL_18047752|2023-07-04|Japan	XBB.1.5	EPI_ISL_18047752	2023-07-04	Japan
BG|XBB.1.5.72|EPI_ISL_18050073|2023-07-04|Germany	XBB.1.5.72	EPI_ISL_18050073	2023-07-04	Germany
BG|XBB.1.5.72|EPI_ISL_18054065|2023-07-04|USA	XBB.1.5.72	EPI_ISL_18054065	2023-07-04	USA
BG|XBB.1.5|EPI_ISL_18060940|2023-07-04|USA	XBB.1.5	EPI_ISL_18060940	2023-07-04	USA
BG|XBB.1.5.89|EPI_ISL_18062753|2023-07-04|Israel	XBB.1.5.89	EPI_ISL_18062753	2023-07-04	Israel
BG|XBB.1.5.72|EPI_ISL_18064803|2023-07-04|USA	XBB.1.5.72	EPI_ISL_18064803	2023-07-04	USA
BG|XBB.1.5.77|EPI_ISL_18071559|2023-07-04|Costa_Rica	XBB.1.5.77	EPI_ISL_18071559	2023-07-04	Costa_Rica
BG|XBB.1.5|EPI_ISL_18071560|2023-07-04|Costa_Rica	XBB.1.5	EPI_ISL_18071560	2023-07-04	Costa_Rica
BG|XBB.1.5|EPI_ISL_18071798|2023-07-04|Colombia	XBB.1.5	EPI_ISL_18071798	2023-07-04	Colombia
BG|XBB.1.5.77|EPI_ISL_18071800|2023-07-04|Colombia	XBB.1.5.77	EPI_ISL_18071800	2023-07-04	Colombia
BG|XBB.1.5|EPI_ISL_18075960|2023-07-04|France	XBB.1.5	EPI_ISL_18075960	2023-07-04	France
BG|XBB.1.5.105|EPI_ISL_18075961|2023-07-04|France	XBB.1.5.105	EPI_ISL_18075961	2023-07-04	France
BG|XBB.1.5|EPI_ISL_18077161|2023-07-04|USA	XBB.1.5	EPI_ISL_18077161	2023-07-04	USA
BG|XBB.1.5|EPI_ISL_18078888|2023-07-04|Brazil	XBB.1.5	EPI_ISL_18078888	2023-07-04	Brazil
BG|XBB.1.5.104|EPI_ISL_18080624|2023-07-04|USA	XBB.1.5.104	EPI_ISL_18080624	2023-07-04	USA
BG|XBB.1.5|EPI_ISL_18082201|2023-07-04|USA	XBB.1.5	EPI_ISL_18082201	2023-07-04	USA
BG|XBB.1.5.72|EPI_ISL_18093546|2023-07-04|USA	XBB.1.5.72	EPI_ISL_18093546	2023-07-04	USA
BG|XBB.1.5.103|EPI_ISL_18095352|2023-07-04|Argentina	XBB.1.5.103	EPI_ISL_18095352	2023-07-04	Argentina
BG|XBB.1.5|EPI_ISL_18101652|2023-07-04|Argentina	XBB.1.5	EPI_ISL_18101652	2023-07-04	Argentina
BG|XBB.1.5.77|EPI_ISL_18107823|2023-07-04|USA	XBB.1.5.77	EPI_ISL_18107823	2023-07-04	USA
BG|XBB.1.5|EPI_ISL_18110715|2023-07-04|USA	XBB.1.5	EPI_ISL_18110715	2023-07-04	USA
BG|XBB.1.5.77|EPI_ISL_17960517|2023-07-05|Colombia	XBB.1.5.77	EPI_ISL_17960517	2023-07-05	Colombia
BG|XBB.1.5.77|EPI_ISL_17960524|2023-07-05|Colombia	XBB.1.5.77	EPI_ISL_17960524	2023-07-05	Colombia
BG|XBB.1.5.77|EPI_ISL_17960532|2023-07-05|Colombia	XBB.1.5.77	EPI_ISL_17960532	2023-07-05	Colombia
BG|XBB.1.5|EPI_ISL_17985432|2023-07-05|USA	XBB.1.5	EPI_ISL_17985432	2023-07-05	USA
BG|XBB.1.5|EPI_ISL_17986706|2023-07-05|USA	XBB.1.5	EPI_ISL_17986706	2023-07-05	USA
BG|XBB.1.5.86|EPI_ISL_17990169|2023-07-05|Dominican_Republic	XBB.1.5.86	EPI_ISL_17990169	2023-07-05	Dominican_Republic
BG|XBB.1.5|EPI_ISL_17990180|2023-07-05|Dominican_Republic	XBB.1.5	EPI_ISL_17990180	2023-07-05	Dominican_Republic
BG|XBB.1.5.73|EPI_ISL_17994035|2023-07-05|Canada	XBB.1.5.73	EPI_ISL_17994035	2023-07-05	Canada
BG|XBB.1.5.77|EPI_ISL_17996296|2023-07-05|USA	XBB.1.5.77	EPI_ISL_17996296	2023-07-05	USA
BG|XBB.1.5|EPI_ISL_17996305|2023-07-05|USA	XBB.1.5	EPI_ISL_17996305	2023-07-05	USA
BG|XBB.1.5|EPI_ISL_17996309|2023-07-05|USA	XBB.1.5	EPI_ISL_17996309	2023-07-05	USA
BG|XBB.1.5.72|EPI_ISL_17996311|2023-07-05|USA	XBB.1.5.72	EPI_ISL_17996311	2023-07-05	USA
BG|XBB.1.5.72|EPI_ISL_17996319|2023-07-05|USA	XBB.1.5.72	EPI_ISL_17996319	2023-07-05	USA
BG|XBB.1.5.97|EPI_ISL_17999376|2023-07-05|Australia	XBB.1.5.97	EPI_ISL_17999376	2023-07-05	Australia
BG|XBB.1.5|EPI_ISL_18005377|2023-07-05|USA	XBB.1.5	EPI_ISL_18005377	2023-07-05	USA
BG|XBB.1.5|EPI_ISL_18005378|2023-07-05|USA	XBB.1.5	EPI_ISL_18005378	2023-07-05	USA
BG|XBB.1.5|EPI_ISL_18005379|2023-07-05|USA	XBB.1.5	EPI_ISL_18005379	2023-07-05	USA
BG|XBB.1.5|EPI_ISL_18010345|2023-07-05|Japan	XBB.1.5	EPI_ISL_18010345	2023-07-05	Japan
BG|XBB.1.5.89|EPI_ISL_18010708|2023-07-05|United_Kingdom	XBB.1.5.89	EPI_ISL_18010708	2023-07-05	United_Kingdom
BG|XBB.1.5|EPI_ISL_18012802|2023-07-05|USA	XBB.1.5	EPI_ISL_18012802	2023-07-05	USA
BG|XBB.1.5|EPI_ISL_18015570|2023-07-05|United_Kingdom	XBB.1.5	EPI_ISL_18015570	2023-07-05	United_Kingdom
BG|XBB.1.5.77|EPI_ISL_18022626|2023-07-05|USA	XBB.1.5.77	EPI_ISL_18022626	2023-07-05	USA
BG|XBB.1.5.104|EPI_ISL_18022632|2023-07-05|USA	XBB.1.5.104	EPI_ISL_18022632	2023-07-05	USA
BG|XBB.1.5|EPI_ISL_18022700|2023-07-05|USA	XBB.1.5	EPI_ISL_18022700	2023-07-05	USA
BG|XBB.1.5.72|EPI_ISL_18022716|2023-07-05|USA	XBB.1.5.72	EPI_ISL_18022716	2023-07-05	USA
BG|XBB.1.5|EPI_ISL_18022738|2023-07-05|USA	XBB.1.5	EPI_ISL_18022738	2023-07-05	USA
BG|XBB.1.5|EPI_ISL_18022749|2023-07-05|USA	XBB.1.5	EPI_ISL_18022749	2023-07-05	USA
BG|XBB.1.5.86|EPI_ISL_18022761|2023-07-05|USA	XBB.1.5.86	EPI_ISL_18022761	2023-07-05	USA
BG|XBB.1.5.72|EPI_ISL_18022769|2023-07-05|USA	XBB.1.5.72	EPI_ISL_18022769	2023-07-05	USA
BG|XBB.1.5.72|EPI_ISL_18022777|2023-07-05|USA	XBB.1.5.72	EPI_ISL_18022777	2023-07-05	USA
BG|XBB.1.5.72|EPI_ISL_18022780|2023-07-05|USA	XBB.1.5.72	EPI_ISL_18022780	2023-07-05	USA
BG|XBB.1.5|EPI_ISL_18022783|2023-07-05|USA	XBB.1.5	EPI_ISL_18022783	2023-07-05	USA
BG|XBB.1.5|EPI_ISL_18022792|2023-07-05|USA	XBB.1.5	EPI_ISL_18022792	2023-07-05	USA
BG|XBB.1.5|EPI_ISL_18030616|2023-07-05|USA	XBB.1.5	EPI_ISL_18030616	2023-07-05	USA
BG|XBB.1.5|EPI_ISL_18032410|2023-07-05|Australia	XBB.1.5	EPI_ISL_18032410	2023-07-05	Australia
BG|XBB.1.5.72|EPI_ISL_18034093|2023-07-05|Switzerland	XBB.1.5.72	EPI_ISL_18034093	2023-07-05	Switzerland
BG|XBB.1.5.97|EPI_ISL_18037533|2023-07-05|USA	XBB.1.5.97	EPI_ISL_18037533	2023-07-05	USA
BG|XBB.1.5|EPI_ISL_18039532|2023-07-05|Japan	XBB.1.5	EPI_ISL_18039532	2023-07-05	Japan
BG|XBB.1.5.90|EPI_ISL_18040349|2023-07-05|Japan	XBB.1.5.90	EPI_ISL_18040349	2023-07-05	Japan
BG|XBB.1.5.77|EPI_ISL_18043029|2023-07-05|Puerto_Rico	XBB.1.5.77	EPI_ISL_18043029	2023-07-05	Puerto_Rico
BG|XBB.1.5|EPI_ISL_18043033|2023-07-05|Puerto_Rico	XBB.1.5	EPI_ISL_18043033	2023-07-05	Puerto_Rico
BG|XBB.1.5.80|EPI_ISL_18043414|2023-07-05|Peru	XBB.1.5.80	EPI_ISL_18043414	2023-07-05	Peru
BG|XBB.1.5.72|EPI_ISL_18043471|2023-07-05|Panama	XBB.1.5.72	EPI_ISL_18043471	2023-07-05	Panama
BG|XBB.1.5|EPI_ISL_18043764|2023-07-05|Canada	XBB.1.5	EPI_ISL_18043764	2023-07-05	Canada
BG|XBB.1.5|EPI_ISL_18044106|2023-07-05|Japan	XBB.1.5	EPI_ISL_18044106	2023-07-05	Japan
BG|XBB.1.5|EPI_ISL_18044650|2023-07-05|USA	XBB.1.5	EPI_ISL_18044650	2023-07-05	USA
BG|XBB.1.5|EPI_ISL_18044653|2023-07-05|USA	XBB.1.5	EPI_ISL_18044653	2023-07-05	USA
BG|XBB.1.5|EPI_ISL_18045074|2023-07-05|USA	XBB.1.5	EPI_ISL_18045074	2023-07-05	USA
BG|XBB.1.5.75|EPI_ISL_18045378|2023-07-05|USA	XBB.1.5.75	EPI_ISL_18045378	2023-07-05	USA
BG|XBB.1.5|EPI_ISL_18045595|2023-07-05|USA	XBB.1.5	EPI_ISL_18045595	2023-07-05	USA
BG|XBB.1.5.72|EPI_ISL_18045634|2023-07-05|USA	XBB.1.5.72	EPI_ISL_18045634	2023-07-05	USA
BG|XBB.1.5|EPI_ISL_18045753|2023-07-05|USA	XBB.1.5	EPI_ISL_18045753	2023-07-05	USA
BG|XBB.1.5.72|EPI_ISL_18045869|2023-07-05|USA	XBB.1.5.72	EPI_ISL_18045869	2023-07-05	USA
BG|XBB.1.5.77|EPI_ISL_18045965|2023-07-05|USA	XBB.1.5.77	EPI_ISL_18045965	2023-07-05	USA
BG|XBB.1.5|EPI_ISL_18046052|2023-07-05|USA	XBB.1.5	EPI_ISL_18046052	2023-07-05	USA
BG|XBB.1.5|EPI_ISL_18047062|2023-07-05|South_Korea	XBB.1.5	EPI_ISL_18047062	2023-07-05	South_Korea
BG|XBB.1.5|EPI_ISL_18047065|2023-07-05|South_Korea	XBB.1.5	EPI_ISL_18047065	2023-07-05	South_Korea
BG|XBB.1.5.101|EPI_ISL_18047123|2023-07-05|South_Korea	XBB.1.5.101	EPI_ISL_18047123	2023-07-05	South_Korea
BG|XBB.1.5.101|EPI_ISL_18047124|2023-07-05|South_Korea	XBB.1.5.101	EPI_ISL_18047124	2023-07-05	South_Korea
BG|XBB.1.5|EPI_ISL_18047185|2023-07-05|South_Korea	XBB.1.5	EPI_ISL_18047185	2023-07-05	South_Korea
BG|XBB.1.5|EPI_ISL_18047190|2023-07-05|South_Korea	XBB.1.5	EPI_ISL_18047190	2023-07-05	South_Korea
BG|XBB.1.5|EPI_ISL_18047195|2023-07-05|South_Korea	XBB.1.5	EPI_ISL_18047195	2023-07-05	South_Korea
BG|XBB.1.5|EPI_ISL_18048710|2023-07-05|Sweden	XBB.1.5	EPI_ISL_18048710	2023-07-05	Sweden
BG|XBB.1.5|EPI_ISL_18050256|2023-07-05|USA	XBB.1.5	EPI_ISL_18050256	2023-07-05	USA
BG|XBB.1.5|EPI_ISL_18050341|2023-07-05|Trinidad_and_Tobago	XBB.1.5	EPI_ISL_18050341	2023-07-05	Trinidad_and_Tobago
BG|XBB.1.5|EPI_ISL_18052418|2023-07-05|Portugal	XBB.1.5	EPI_ISL_18052418	2023-07-05	Portugal
BG|XBB.1.5|EPI_ISL_18052775|2023-07-05|United_Kingdom	XBB.1.5	EPI_ISL_18052775	2023-07-05	United_Kingdom
BG|XBB.1.5|EPI_ISL_18053081|2023-07-05|USA	XBB.1.5	EPI_ISL_18053081	2023-07-05	USA
BG|XBB.1.5|EPI_ISL_18057421|2023-07-05|USA	XBB.1.5	EPI_ISL_18057421	2023-07-05	USA
BG|XBB.1.5|EPI_ISL_18057554|2023-07-05|USA	XBB.1.5	EPI_ISL_18057554	2023-07-05	USA
BG|XBB.1.22|EPI_ISL_18057623|2023-07-05|USA	XBB.1.22	EPI_ISL_18057623	2023-07-05	USA
BG|XBB.1.22|EPI_ISL_18057636|2023-07-05|USA	XBB.1.22	EPI_ISL_18057636	2023-07-05	USA
BG|XBB.1.5|EPI_ISL_18057659|2023-07-05|USA	XBB.1.5	EPI_ISL_18057659	2023-07-05	USA
BG|XBB.1.5.72|EPI_ISL_18058049|2023-07-05|USA	XBB.1.5.72	EPI_ISL_18058049	2023-07-05	USA
BG|XBB.1.5|EPI_ISL_18059981|2023-07-05|Puerto_Rico	XBB.1.5	EPI_ISL_18059981	2023-07-05	Puerto_Rico
BG|XBB.1.5|EPI_ISL_18059982|2023-07-05|Puerto_Rico	XBB.1.5	EPI_ISL_18059982	2023-07-05	Puerto_Rico
BG|XBB.1.5|EPI_ISL_18066263|2023-07-05|Japan	XBB.1.5	EPI_ISL_18066263	2023-07-05	Japan
BG|XBB.1.5|EPI_ISL_18067036|2023-07-05|Sweden	XBB.1.5	EPI_ISL_18067036	2023-07-05	Sweden
BG|XBB.1.5|EPI_ISL_18071336|2023-07-05|USA	XBB.1.5	EPI_ISL_18071336	2023-07-05	USA
BG|XBB.1.5|EPI_ISL_18071491|2023-07-05|Costa_Rica	XBB.1.5	EPI_ISL_18071491	2023-07-05	Costa_Rica
BG|XBB.1.5|EPI_ISL_18071493|2023-07-05|Costa_Rica	XBB.1.5	EPI_ISL_18071493	2023-07-05	Costa_Rica
BG|XBB.1.5|EPI_ISL_18071548|2023-07-05|Costa_Rica	XBB.1.5	EPI_ISL_18071548	2023-07-05	Costa_Rica
BG|XBB.1.5|EPI_ISL_18071549|2023-07-05|Costa_Rica	XBB.1.5	EPI_ISL_18071549	2023-07-05	Costa_Rica
BG|XBB.1.5|EPI_ISL_18071551|2023-07-05|Costa_Rica	XBB.1.5	EPI_ISL_18071551	2023-07-05	Costa_Rica
BG|XBB.1.5|EPI_ISL_18071552|2023-07-05|Costa_Rica	XBB.1.5	EPI_ISL_18071552	2023-07-05	Costa_Rica
BG|XBB.1.5|EPI_ISL_18071553|2023-07-05|Costa_Rica	XBB.1.5	EPI_ISL_18071553	2023-07-05	Costa_Rica
BG|XBB.1.5.77|EPI_ISL_18071562|2023-07-05|Costa_Rica	XBB.1.5.77	EPI_ISL_18071562	2023-07-05	Costa_Rica
BG|XBB.1.5|EPI_ISL_18071564|2023-07-05|Costa_Rica	XBB.1.5	EPI_ISL_18071564	2023-07-05	Costa_Rica
BG|XBB.1.5|EPI_ISL_18072019|2023-07-05|United_Kingdom	XBB.1.5	EPI_ISL_18072019	2023-07-05	United_Kingdom
BG|XBB.1.5|EPI_ISL_18072213|2023-07-05|Italy	XBB.1.5	EPI_ISL_18072213	2023-07-05	Italy
BG|XBB.1.5|EPI_ISL_18073864|2023-07-05|USA	XBB.1.5	EPI_ISL_18073864	2023-07-05	USA
BG|XBB.1.5|EPI_ISL_18076894|2023-07-05|Colombia	XBB.1.5	EPI_ISL_18076894	2023-07-05	Colombia
BG|XBB.1.5.72|EPI_ISL_18076905|2023-07-05|Colombia	XBB.1.5.72	EPI_ISL_18076905	2023-07-05	Colombia
BG|XBB.1.5.72|EPI_ISL_18076909|2023-07-05|Colombia	XBB.1.5.72	EPI_ISL_18076909	2023-07-05	Colombia
BG|XBB.1.5.72|EPI_ISL_18076910|2023-07-05|Colombia	XBB.1.5.72	EPI_ISL_18076910	2023-07-05	Colombia
BG|XBB.1.5.72|EPI_ISL_18076912|2023-07-05|Colombia	XBB.1.5.72	EPI_ISL_18076912	2023-07-05	Colombia
BG|XBB.1.5.77|EPI_ISL_18076931|2023-07-05|Colombia	XBB.1.5.77	EPI_ISL_18076931	2023-07-05	Colombia
BG|XBB.1.5|EPI_ISL_18080472|2023-07-05|USA	XBB.1.5	EPI_ISL_18080472	2023-07-05	USA
BG|XBB.1.5|EPI_ISL_18080631|2023-07-05|USA	XBB.1.5	EPI_ISL_18080631	2023-07-05	USA
BG|XBB.1.5|EPI_ISL_18080695|2023-07-05|USA	XBB.1.5	EPI_ISL_18080695	2023-07-05	USA
BG|XBB.1.5.72|EPI_ISL_18080738|2023-07-05|USA	XBB.1.5.72	EPI_ISL_18080738	2023-07-05	USA
BG|XBB.1.5|EPI_ISL_18080943|2023-07-05|USA	XBB.1.5	EPI_ISL_18080943	2023-07-05	USA
BG|XBB.1.5|EPI_ISL_18080957|2023-07-05|USA	XBB.1.5	EPI_ISL_18080957	2023-07-05	USA
BG|XBB.1.5|EPI_ISL_18081004|2023-07-05|USA	XBB.1.5	EPI_ISL_18081004	2023-07-05	USA
BG|XBB.1.5|EPI_ISL_18082219|2023-07-05|USA	XBB.1.5	EPI_ISL_18082219	2023-07-05	USA
BG|XBB.1.33|EPI_ISL_18086984|2023-07-05|Italy	XBB.1.33	EPI_ISL_18086984	2023-07-05	Italy
BG|XBB.1.5|EPI_ISL_18090432|2023-07-05|USA	XBB.1.5	EPI_ISL_18090432	2023-07-05	USA
BG|XBB.1.5|EPI_ISL_18097861|2023-07-05|Japan	XBB.1.5	EPI_ISL_18097861	2023-07-05	Japan
BG|XBB.1.5.90|EPI_ISL_18097862|2023-07-05|Japan	XBB.1.5.90	EPI_ISL_18097862	2023-07-05	Japan
BG|XBB.1.5|EPI_ISL_18100684|2023-07-05|Japan	XBB.1.5	EPI_ISL_18100684	2023-07-05	Japan
BG|XBB.1.5|EPI_ISL_18108130|2023-07-05|USA	XBB.1.5	EPI_ISL_18108130	2023-07-05	USA
BG|XBB.1.5.72|EPI_ISL_17981865|2023-07-06|USA	XBB.1.5.72	EPI_ISL_17981865	2023-07-06	USA
BG|XBB.1.5|EPI_ISL_17985221|2023-07-06|Spain	XBB.1.5	EPI_ISL_17985221	2023-07-06	Spain
BG|XBB.1.5|EPI_ISL_17986673|2023-07-06|USA	XBB.1.5	EPI_ISL_17986673	2023-07-06	USA
BG|XBB.1.5|EPI_ISL_17989191|2023-07-06|Spain	XBB.1.5	EPI_ISL_17989191	2023-07-06	Spain
BG|XBB.1.5|EPI_ISL_17989862|2023-07-06|Netherlands	XBB.1.5	EPI_ISL_17989862	2023-07-06	Netherlands
BG|XBB.1.5|EPI_ISL_17993983|2023-07-06|Canada	XBB.1.5	EPI_ISL_17993983	2023-07-06	Canada
BG|XBB.1.5.73|EPI_ISL_17994045|2023-07-06|Canada	XBB.1.5.73	EPI_ISL_17994045	2023-07-06	Canada
BG|XBB.1.5.72|EPI_ISL_17994056|2023-07-06|Canada	XBB.1.5.72	EPI_ISL_17994056	2023-07-06	Canada
BG|XBB.1.5|EPI_ISL_17996329|2023-07-06|USA	XBB.1.5	EPI_ISL_17996329	2023-07-06	USA
BG|XBB.1.5|EPI_ISL_17996332|2023-07-06|USA	XBB.1.5	EPI_ISL_17996332	2023-07-06	USA
BG|XBB.1.5|EPI_ISL_17996867|2023-07-06|Canada	XBB.1.5	EPI_ISL_17996867	2023-07-06	Canada
BG|XBB.1.5.90|EPI_ISL_18006690|2023-07-06|Japan	XBB.1.5.90	EPI_ISL_18006690	2023-07-06	Japan
BG|XBB.1.5|EPI_ISL_18006694|2023-07-06|Japan	XBB.1.5	EPI_ISL_18006694	2023-07-06	Japan
BG|XBB.1.5|EPI_ISL_18006697|2023-07-06|Japan	XBB.1.5	EPI_ISL_18006697	2023-07-06	Japan
BG|XBB.1.5.77|EPI_ISL_18008694|2023-07-06|USA	XBB.1.5.77	EPI_ISL_18008694	2023-07-06	USA
BG|XBB.1.5.97|EPI_ISL_18013341|2023-07-06|Japan	XBB.1.5.97	EPI_ISL_18013341	2023-07-06	Japan
BG|XBB.1.5|EPI_ISL_18013377|2023-07-06|Japan	XBB.1.5	EPI_ISL_18013377	2023-07-06	Japan
BG|XBB.1.5|EPI_ISL_18015554|2023-07-06|United_Kingdom	XBB.1.5	EPI_ISL_18015554	2023-07-06	United_Kingdom
BG|XBB.1.5|EPI_ISL_18015555|2023-07-06|United_Kingdom	XBB.1.5	EPI_ISL_18015555	2023-07-06	United_Kingdom
BG|XBB.1.5|EPI_ISL_18022840|2023-07-06|USA	XBB.1.5	EPI_ISL_18022840	2023-07-06	USA
BG|XBB.1.5|EPI_ISL_18022867|2023-07-06|USA	XBB.1.5	EPI_ISL_18022867	2023-07-06	USA
BG|XBB.1.5.104|EPI_ISL_18037085|2023-07-06|Canada	XBB.1.5.104	EPI_ISL_18037085	2023-07-06	Canada
BG|XBB.1.5.104|EPI_ISL_18037140|2023-07-06|Canada	XBB.1.5.104	EPI_ISL_18037140	2023-07-06	Canada
BG|XBB.1.5|EPI_ISL_18037543|2023-07-06|USA	XBB.1.5	EPI_ISL_18037543	2023-07-06	USA
BG|XBB.1.5|EPI_ISL_18037547|2023-07-06|USA	XBB.1.5	EPI_ISL_18037547	2023-07-06	USA
BG|XBB.1.5|EPI_ISL_18037786|2023-07-06|USA	XBB.1.5	EPI_ISL_18037786	2023-07-06	USA
BG|XBB.1.5|EPI_ISL_18037787|2023-07-06|USA	XBB.1.5	EPI_ISL_18037787	2023-07-06	USA
BG|XBB.1.5|EPI_ISL_18038620|2023-07-06|USA	XBB.1.5	EPI_ISL_18038620	2023-07-06	USA
BG|XBB.1.5|EPI_ISL_18038622|2023-07-06|USA	XBB.1.5	EPI_ISL_18038622	2023-07-06	USA
BG|XBB.1.5|EPI_ISL_18038635|2023-07-06|USA	XBB.1.5	EPI_ISL_18038635	2023-07-06	USA
BG|XBB.1.5.75|EPI_ISL_18038636|2023-07-06|USA	XBB.1.5.75	EPI_ISL_18038636	2023-07-06	USA
BG|XBB.1.5|EPI_ISL_18038638|2023-07-06|USA	XBB.1.5	EPI_ISL_18038638	2023-07-06	USA
BG|XBB.1.5.75|EPI_ISL_18038672|2023-07-06|USA	XBB.1.5.75	EPI_ISL_18038672	2023-07-06	USA
BG|XBB.1.5|EPI_ISL_18040323|2023-07-06|Japan	XBB.1.5	EPI_ISL_18040323	2023-07-06	Japan
BG|XBB.1.5|EPI_ISL_18040332|2023-07-06|Japan	XBB.1.5	EPI_ISL_18040332	2023-07-06	Japan
BG|XBB.1.5|EPI_ISL_18040342|2023-07-06|Japan	XBB.1.5	EPI_ISL_18040342	2023-07-06	Japan
BG|XBB.1.5|EPI_ISL_18042273|2023-07-06|Spain	XBB.1.5	EPI_ISL_18042273	2023-07-06	Spain
BG|XBB.1.5.72|EPI_ISL_18043473|2023-07-06|Panama	XBB.1.5.72	EPI_ISL_18043473	2023-07-06	Panama
BG|XBB.1.5|EPI_ISL_18044400|2023-07-06|United_Kingdom	XBB.1.5	EPI_ISL_18044400	2023-07-06	United_Kingdom
BG|XBB.1.5|EPI_ISL_18045455|2023-07-06|USA	XBB.1.5	EPI_ISL_18045455	2023-07-06	USA
BG|XBB.1.5|EPI_ISL_18047251|2023-07-06|South_Korea	XBB.1.5	EPI_ISL_18047251	2023-07-06	South_Korea
BG|XBB.1.5.38|EPI_ISL_18047256|2023-07-06|South_Korea	XBB.1.5.38	EPI_ISL_18047256	2023-07-06	South_Korea
BG|XBB.1.5|EPI_ISL_18047814|2023-07-06|New_Zealand	XBB.1.5	EPI_ISL_18047814	2023-07-06	New_Zealand
BG|XBB.1.5|EPI_ISL_18048656|2023-07-06|Japan	XBB.1.5	EPI_ISL_18048656	2023-07-06	Japan
BG|XBB.1.5|EPI_ISL_18048972|2023-07-06|France	XBB.1.5	EPI_ISL_18048972	2023-07-06	France
BG|XBB.1.5.94|EPI_ISL_18052443|2023-07-06|Portugal	XBB.1.5.94	EPI_ISL_18052443	2023-07-06	Portugal
BG|XBB.1.5|EPI_ISL_18052891|2023-07-06|Canada	XBB.1.5	EPI_ISL_18052891	2023-07-06	Canada
BG|XBB.1.5|EPI_ISL_18052976|2023-07-06|Canada	XBB.1.5	EPI_ISL_18052976	2023-07-06	Canada
BG|XBB.1.5|EPI_ISL_18055086|2023-07-06|USA	XBB.1.5	EPI_ISL_18055086	2023-07-06	USA
BG|XBB.1.5|EPI_ISL_18056400|2023-07-06|Japan	XBB.1.5	EPI_ISL_18056400	2023-07-06	Japan
BG|XBB.1.5|EPI_ISL_18057364|2023-07-06|USA	XBB.1.5	EPI_ISL_18057364	2023-07-06	USA
BG|XBB.1.5|EPI_ISL_18057399|2023-07-06|USA	XBB.1.5	EPI_ISL_18057399	2023-07-06	USA
BG|XBB.1.5|EPI_ISL_18057616|2023-07-06|USA	XBB.1.5	EPI_ISL_18057616	2023-07-06	USA
BG|XBB.1.5|EPI_ISL_18057635|2023-07-06|USA	XBB.1.5	EPI_ISL_18057635	2023-07-06	USA
BG|XBB.1.5|EPI_ISL_18057666|2023-07-06|USA	XBB.1.5	EPI_ISL_18057666	2023-07-06	USA
BG|XBB.1.5.72|EPI_ISL_18058310|2023-07-06|Colombia	XBB.1.5.72	EPI_ISL_18058310	2023-07-06	Colombia
BG|XBB.1.5.89|EPI_ISL_18062754|2023-07-06|Israel	XBB.1.5.89	EPI_ISL_18062754	2023-07-06	Israel
BG|XBB.1.5|EPI_ISL_18064468|2023-07-06|USA	XBB.1.5	EPI_ISL_18064468	2023-07-06	USA
BG|XBB.1.5|EPI_ISL_18071486|2023-07-06|Costa_Rica	XBB.1.5	EPI_ISL_18071486	2023-07-06	Costa_Rica
BG|XBB.1.5|EPI_ISL_18071494|2023-07-06|Costa_Rica	XBB.1.5	EPI_ISL_18071494	2023-07-06	Costa_Rica
BG|XBB.1.5.77|EPI_ISL_18071790|2023-07-06|Colombia	XBB.1.5.77	EPI_ISL_18071790	2023-07-06	Colombia
BG|XBB.1.5.77|EPI_ISL_18071811|2023-07-06|Colombia	XBB.1.5.77	EPI_ISL_18071811	2023-07-06	Colombia
BG|XBB.1.5.72|EPI_ISL_18071813|2023-07-06|Colombia	XBB.1.5.72	EPI_ISL_18071813	2023-07-06	Colombia
BG|XBB.1.5.77|EPI_ISL_18071833|2023-07-06|Colombia	XBB.1.5.77	EPI_ISL_18071833	2023-07-06	Colombia
BG|XBB.1.5.72|EPI_ISL_18071847|2023-07-06|Colombia	XBB.1.5.72	EPI_ISL_18071847	2023-07-06	Colombia
BG|XBB.1.5.105|EPI_ISL_18075514|2023-07-06|Belgium	XBB.1.5.105	EPI_ISL_18075514	2023-07-06	Belgium
BG|XBB.1.5|EPI_ISL_18075546|2023-07-06|Spain	XBB.1.5	EPI_ISL_18075546	2023-07-06	Spain
BG|XBB.1.5.72|EPI_ISL_18076904|2023-07-06|Colombia	XBB.1.5.72	EPI_ISL_18076904	2023-07-06	Colombia
BG|XBB.1.5.72|EPI_ISL_18076908|2023-07-06|Colombia	XBB.1.5.72	EPI_ISL_18076908	2023-07-06	Colombia
BG|XBB.1.5.72|EPI_ISL_18076920|2023-07-06|Colombia	XBB.1.5.72	EPI_ISL_18076920	2023-07-06	Colombia
BG|XBB.1.5.77|EPI_ISL_18076933|2023-07-06|Colombia	XBB.1.5.77	EPI_ISL_18076933	2023-07-06	Colombia
BG|XBB.1.5.77|EPI_ISL_18076937|2023-07-06|Colombia	XBB.1.5.77	EPI_ISL_18076937	2023-07-06	Colombia
BG|XBB.1.5.95|EPI_ISL_18080704|2023-07-06|USA	XBB.1.5.95	EPI_ISL_18080704	2023-07-06	USA
BG|XBB.1.5|EPI_ISL_18080713|2023-07-06|USA	XBB.1.5	EPI_ISL_18080713	2023-07-06	USA
BG|XBB.1.5|EPI_ISL_18080789|2023-07-06|USA	XBB.1.5	EPI_ISL_18080789	2023-07-06	USA
BG|XBB.1.5|EPI_ISL_18080959|2023-07-06|USA	XBB.1.5	EPI_ISL_18080959	2023-07-06	USA
BG|XBB.1.5.92|EPI_ISL_18081014|2023-07-06|USA	XBB.1.5.92	EPI_ISL_18081014	2023-07-06	USA
BG|XBB.1.5|EPI_ISL_18081032|2023-07-06|USA	XBB.1.5	EPI_ISL_18081032	2023-07-06	USA
BG|XBB.1.5|EPI_ISL_18081983|2023-07-06|Japan	XBB.1.5	EPI_ISL_18081983	2023-07-06	Japan
BG|XBB.1.5|EPI_ISL_18096581|2023-07-06|Greece	XBB.1.5	EPI_ISL_18096581	2023-07-06	Greece
BG|XBB.1.5|EPI_ISL_18105223|2023-07-06|USA	XBB.1.5	EPI_ISL_18105223	2023-07-06	USA
BG|XBB.1.5.95|EPI_ISL_18107624|2023-07-06|USA	XBB.1.5.95	EPI_ISL_18107624	2023-07-06	USA
BG|XBB.1.5|EPI_ISL_18107854|2023-07-06|USA	XBB.1.5	EPI_ISL_18107854	2023-07-06	USA
BG|XBB.1.5.106|EPI_ISL_18108133|2023-07-06|USA	XBB.1.5.106	EPI_ISL_18108133	2023-07-06	USA
BG|XBB.1.5|EPI_ISL_18108677|2023-07-06|China	XBB.1.5	EPI_ISL_18108677	2023-07-06	China
BG|XBB.1.5|EPI_ISL_18110073|2023-07-06|USA	XBB.1.5	EPI_ISL_18110073	2023-07-06	USA
BG|XBB.1.5|EPI_ISL_17996087|2023-07-07|USA	XBB.1.5	EPI_ISL_17996087	2023-07-07	USA
BG|XBB.1.5|EPI_ISL_17996115|2023-07-07|USA	XBB.1.5	EPI_ISL_17996115	2023-07-07	USA
BG|XBB.1.5|EPI_ISL_17996347|2023-07-07|USA	XBB.1.5	EPI_ISL_17996347	2023-07-07	USA
BG|XBB.1.5|EPI_ISL_17996348|2023-07-07|USA	XBB.1.5	EPI_ISL_17996348	2023-07-07	USA
BG|XBB.1.5.100|EPI_ISL_17996353|2023-07-07|USA	XBB.1.5.100	EPI_ISL_17996353	2023-07-07	USA
BG|XBB.1.5|EPI_ISL_17996356|2023-07-07|USA	XBB.1.5	EPI_ISL_17996356	2023-07-07	USA
BG|XBB.1.5|EPI_ISL_17996363|2023-07-07|USA	XBB.1.5	EPI_ISL_17996363	2023-07-07	USA
BG|XBB.1.5|EPI_ISL_17996366|2023-07-07|USA	XBB.1.5	EPI_ISL_17996366	2023-07-07	USA
BG|XBB.1.5|EPI_ISL_17996368|2023-07-07|USA	XBB.1.5	EPI_ISL_17996368	2023-07-07	USA
BG|XBB.1.5.72|EPI_ISL_17996374|2023-07-07|USA	XBB.1.5.72	EPI_ISL_17996374	2023-07-07	USA
BG|XBB.1.5.77|EPI_ISL_18005381|2023-07-07|USA	XBB.1.5.77	EPI_ISL_18005381	2023-07-07	USA
BG|XBB.1.5.92|EPI_ISL_18012775|2023-07-07|USA	XBB.1.5.92	EPI_ISL_18012775	2023-07-07	USA
BG|XBB.1.5.77|EPI_ISL_18022944|2023-07-07|USA	XBB.1.5.77	EPI_ISL_18022944	2023-07-07	USA
BG|XBB.1.5|EPI_ISL_18022972|2023-07-07|USA	XBB.1.5	EPI_ISL_18022972	2023-07-07	USA
BG|XBB.1.5|EPI_ISL_18022981|2023-07-07|USA	XBB.1.5	EPI_ISL_18022981	2023-07-07	USA
BG|XBB.1.5.73|EPI_ISL_18022983|2023-07-07|USA	XBB.1.5.73	EPI_ISL_18022983	2023-07-07	USA
BG|XBB.1.5.83|EPI_ISL_18030086|2023-07-07|Canada	XBB.1.5.83	EPI_ISL_18030086	2023-07-07	Canada
BG|XBB.1.5|EPI_ISL_18037562|2023-07-07|USA	XBB.1.5	EPI_ISL_18037562	2023-07-07	USA
BG|XBB.1.5.72|EPI_ISL_18037565|2023-07-07|USA	XBB.1.5.72	EPI_ISL_18037565	2023-07-07	USA
BG|XBB.1.5.72|EPI_ISL_18037567|2023-07-07|USA	XBB.1.5.72	EPI_ISL_18037567	2023-07-07	USA
BG|XBB.1.5|EPI_ISL_18040469|2023-07-07|Japan	XBB.1.5	EPI_ISL_18040469	2023-07-07	Japan
BG|XBB.1.5|EPI_ISL_18040474|2023-07-07|Japan	XBB.1.5	EPI_ISL_18040474	2023-07-07	Japan
BG|XBB.1.5|EPI_ISL_18043475|2023-07-07|Panama	XBB.1.5	EPI_ISL_18043475	2023-07-07	Panama
BG|XBB.1.5|EPI_ISL_18043477|2023-07-07|Panama	XBB.1.5	EPI_ISL_18043477	2023-07-07	Panama
BG|XBB.1.5|EPI_ISL_18044658|2023-07-07|USA	XBB.1.5	EPI_ISL_18044658	2023-07-07	USA
BG|XBB.1.5.77|EPI_ISL_18045078|2023-07-07|USA	XBB.1.5.77	EPI_ISL_18045078	2023-07-07	USA
BG|XBB.1.5.72|EPI_ISL_18045250|2023-07-07|Canada	XBB.1.5.72	EPI_ISL_18045250	2023-07-07	Canada
BG|XBB.1.5|EPI_ISL_18045258|2023-07-07|Canada	XBB.1.5	EPI_ISL_18045258	2023-07-07	Canada
BG|XBB.1.5|EPI_ISL_18045297|2023-07-07|Canada	XBB.1.5	EPI_ISL_18045297	2023-07-07	Canada
BG|XBB.1.5.72|EPI_ISL_18045636|2023-07-07|USA	XBB.1.5.72	EPI_ISL_18045636	2023-07-07	USA
BG|XBB.1.5.77|EPI_ISL_18045638|2023-07-07|USA	XBB.1.5.77	EPI_ISL_18045638	2023-07-07	USA
BG|XBB.1.5|EPI_ISL_18045961|2023-07-07|USA	XBB.1.5	EPI_ISL_18045961	2023-07-07	USA
BG|XBB.1.5|EPI_ISL_18047323|2023-07-07|South_Korea	XBB.1.5	EPI_ISL_18047323	2023-07-07	South_Korea
BG|XBB.1.5.86|EPI_ISL_18047368|2023-07-07|South_Korea	XBB.1.5.86	EPI_ISL_18047368	2023-07-07	South_Korea
BG|XBB.1.5.86|EPI_ISL_18047369|2023-07-07|South_Korea	XBB.1.5.86	EPI_ISL_18047369	2023-07-07	South_Korea
BG|XBB.1.5|EPI_ISL_18047735|2023-07-07|Japan	XBB.1.5	EPI_ISL_18047735	2023-07-07	Japan
BG|XBB.1.5.89|EPI_ISL_18048974|2023-07-07|France	XBB.1.5.89	EPI_ISL_18048974	2023-07-07	France
BG|XBB.1.5.72|EPI_ISL_18050259|2023-07-07|USA	XBB.1.5.72	EPI_ISL_18050259	2023-07-07	USA
BG|XBB.1.5|EPI_ISL_18051402|2023-07-07|Japan	XBB.1.5	EPI_ISL_18051402	2023-07-07	Japan
BG|XBB.1.5|EPI_ISL_18052416|2023-07-07|Portugal	XBB.1.5	EPI_ISL_18052416	2023-07-07	Portugal
BG|XBB.1.5|EPI_ISL_18052892|2023-07-07|Canada	XBB.1.5	EPI_ISL_18052892	2023-07-07	Canada
BG|XBB.1.5|EPI_ISL_18052955|2023-07-07|Canada	XBB.1.5	EPI_ISL_18052955	2023-07-07	Canada
BG|XBB.1.5|EPI_ISL_18052967|2023-07-07|Canada	XBB.1.5	EPI_ISL_18052967	2023-07-07	Canada
BG|XBB.1.5|EPI_ISL_18053015|2023-07-07|Canada	XBB.1.5	EPI_ISL_18053015	2023-07-07	Canada
BG|XBB.1.5.77|EPI_ISL_18053049|2023-07-07|USA	XBB.1.5.77	EPI_ISL_18053049	2023-07-07	USA
BG|XBB.1.5|EPI_ISL_18053737|2023-07-07|USA	XBB.1.5	EPI_ISL_18053737	2023-07-07	USA
BG|XBB.1.5|EPI_ISL_18057525|2023-07-07|USA	XBB.1.5	EPI_ISL_18057525	2023-07-07	USA
BG|XBB.1.5.77|EPI_ISL_18057624|2023-07-07|USA	XBB.1.5.77	EPI_ISL_18057624	2023-07-07	USA
BG|XBB.1.5|EPI_ISL_18057660|2023-07-07|USA	XBB.1.5	EPI_ISL_18057660	2023-07-07	USA
BG|XBB.1.5|EPI_ISL_18057680|2023-07-07|USA	XBB.1.5	EPI_ISL_18057680	2023-07-07	USA
BG|XBB.1.5|EPI_ISL_18071483|2023-07-07|Costa_Rica	XBB.1.5	EPI_ISL_18071483	2023-07-07	Costa_Rica
BG|XBB.1.5.77|EPI_ISL_18071796|2023-07-07|Colombia	XBB.1.5.77	EPI_ISL_18071796	2023-07-07	Colombia
BG|XBB.1.5.72|EPI_ISL_18071799|2023-07-07|Colombia	XBB.1.5.72	EPI_ISL_18071799	2023-07-07	Colombia
BG|XBB.1.5.72|EPI_ISL_18071803|2023-07-07|Colombia	XBB.1.5.72	EPI_ISL_18071803	2023-07-07	Colombia
BG|XBB.1.5.72|EPI_ISL_18071843|2023-07-07|Colombia	XBB.1.5.72	EPI_ISL_18071843	2023-07-07	Colombia
BG|XBB.1.5.72|EPI_ISL_18071846|2023-07-07|Colombia	XBB.1.5.72	EPI_ISL_18071846	2023-07-07	Colombia
BG|XBB.1.5.77|EPI_ISL_18071852|2023-07-07|Colombia	XBB.1.5.77	EPI_ISL_18071852	2023-07-07	Colombia
BG|XBB.1.5|EPI_ISL_18073886|2023-07-07|USA	XBB.1.5	EPI_ISL_18073886	2023-07-07	USA
BG|XBB.1.5.100|EPI_ISL_18074686|2023-07-07|China	XBB.1.5.100	EPI_ISL_18074686	2023-07-07	China
BG|XBB.1.5|EPI_ISL_18075523|2023-07-07|Ecuador	XBB.1.5	EPI_ISL_18075523	2023-07-07	Ecuador
BG|XBB.1.5.72|EPI_ISL_18076921|2023-07-07|Colombia	XBB.1.5.72	EPI_ISL_18076921	2023-07-07	Colombia
BG|XBB.1.5.77|EPI_ISL_18076930|2023-07-07|Colombia	XBB.1.5.77	EPI_ISL_18076930	2023-07-07	Colombia
BG|XBB.1.5.77|EPI_ISL_18076944|2023-07-07|Colombia	XBB.1.5.77	EPI_ISL_18076944	2023-07-07	Colombia
BG|XBB.1.5.77|EPI_ISL_18076948|2023-07-07|Colombia	XBB.1.5.77	EPI_ISL_18076948	2023-07-07	Colombia
BG|XBB.1.5|EPI_ISL_18076996|2023-07-07|USA	XBB.1.5	EPI_ISL_18076996	2023-07-07	USA
BG|XBB.1.5.100|EPI_ISL_18080689|2023-07-07|USA	XBB.1.5.100	EPI_ISL_18080689	2023-07-07	USA
BG|XBB.1.5.73|EPI_ISL_18080790|2023-07-07|USA	XBB.1.5.73	EPI_ISL_18080790	2023-07-07	USA
BG|XBB.1.5|EPI_ISL_18080792|2023-07-07|USA	XBB.1.5	EPI_ISL_18080792	2023-07-07	USA
BG|XBB.1.5|EPI_ISL_18081321|2023-07-07|USA	XBB.1.5	EPI_ISL_18081321	2023-07-07	USA
BG|XBB.1.5|EPI_ISL_18082014|2023-07-07|USA	XBB.1.5	EPI_ISL_18082014	2023-07-07	USA
BG|XBB.1.5|EPI_ISL_18090455|2023-07-07|USA	XBB.1.5	EPI_ISL_18090455	2023-07-07	USA
BG|XBB.1.5|EPI_ISL_18095192|2023-07-07|Argentina	XBB.1.5	EPI_ISL_18095192	2023-07-07	Argentina
BG|XBB.1.5|EPI_ISL_18095193|2023-07-07|Argentina	XBB.1.5	EPI_ISL_18095193	2023-07-07	Argentina
BG|XBB.1.5|EPI_ISL_18107869|2023-07-07|USA	XBB.1.5	EPI_ISL_18107869	2023-07-07	USA
BG|XBB.1.5.88|EPI_ISL_18108961|2023-07-07|South_Africa	XBB.1.5.88	EPI_ISL_18108961	2023-07-07	South_Africa
BG|XBB.1.5|EPI_ISL_18112549|2023-07-07|Spain	XBB.1.5	EPI_ISL_18112549	2023-07-07	Spain
BG|XBB.1.5|EPI_ISL_17985217|2023-07-08|Spain	XBB.1.5	EPI_ISL_17985217	2023-07-08	Spain
BG|XBB.1.5.102|EPI_ISL_17996090|2023-07-08|USA	XBB.1.5.102	EPI_ISL_17996090	2023-07-08	USA
BG|XBB.1.5|EPI_ISL_18008482|2023-07-08|Italy	XBB.1.5	EPI_ISL_18008482	2023-07-08	Italy
BG|XBB.1.5.72|EPI_ISL_18008602|2023-07-08|Spain	XBB.1.5.72	EPI_ISL_18008602	2023-07-08	Spain
BG|XBB.1.5.77|EPI_ISL_18023002|2023-07-08|USA	XBB.1.5.77	EPI_ISL_18023002	2023-07-08	USA
BG|XBB.1.5|EPI_ISL_18030442|2023-07-08|Canada	XBB.1.5	EPI_ISL_18030442	2023-07-08	Canada
BG|XBB.1.5.72|EPI_ISL_18037087|2023-07-08|Canada	XBB.1.5.72	EPI_ISL_18037087	2023-07-08	Canada
BG|XBB.1.5.72|EPI_ISL_18037568|2023-07-08|USA	XBB.1.5.72	EPI_ISL_18037568	2023-07-08	USA
BG|XBB.1.5|EPI_ISL_18037569|2023-07-08|USA	XBB.1.5	EPI_ISL_18037569	2023-07-08	USA
BG|XBB.1.5|EPI_ISL_18037805|2023-07-08|USA	XBB.1.5	EPI_ISL_18037805	2023-07-08	USA
BG|XBB.1.5.73|EPI_ISL_18039147|2023-07-08|South_Korea	XBB.1.5.73	EPI_ISL_18039147	2023-07-08	South_Korea
BG|XBB.1.5.81|EPI_ISL_18040092|2023-07-08|USA	XBB.1.5.81	EPI_ISL_18040092	2023-07-08	USA
BG|XBB.1.5|EPI_ISL_18040471|2023-07-08|Japan	XBB.1.5	EPI_ISL_18040471	2023-07-08	Japan
BG|XBB.1.5.77|EPI_ISL_18045641|2023-07-08|USA	XBB.1.5.77	EPI_ISL_18045641	2023-07-08	USA
BG|XBB.1.5|EPI_ISL_18045702|2023-07-08|USA	XBB.1.5	EPI_ISL_18045702	2023-07-08	USA
BG|XBB.1.5.105|EPI_ISL_18046487|2023-07-08|Canada	XBB.1.5.105	EPI_ISL_18046487	2023-07-08	Canada
BG|XBB.1.5|EPI_ISL_18047414|2023-07-08|South_Korea	XBB.1.5	EPI_ISL_18047414	2023-07-08	South_Korea
BG|XBB.1.5|EPI_ISL_18047428|2023-07-08|South_Korea	XBB.1.5	EPI_ISL_18047428	2023-07-08	South_Korea
BG|XBB.1.5|EPI_ISL_18047448|2023-07-08|South_Korea	XBB.1.5	EPI_ISL_18047448	2023-07-08	South_Korea
BG|XBB.1.5|EPI_ISL_18047470|2023-07-08|South_Korea	XBB.1.5	EPI_ISL_18047470	2023-07-08	South_Korea
BG|XBB.1.5|EPI_ISL_18047471|2023-07-08|South_Korea	XBB.1.5	EPI_ISL_18047471	2023-07-08	South_Korea
BG|XBB.1.5|EPI_ISL_18052350|2023-07-08|Portugal	XBB.1.5	EPI_ISL_18052350	2023-07-08	Portugal
BG|XBB.1.5.72|EPI_ISL_18052921|2023-07-08|Canada	XBB.1.5.72	EPI_ISL_18052921	2023-07-08	Canada
BG|XBB.1.5|EPI_ISL_18053002|2023-07-08|Canada	XBB.1.5	EPI_ISL_18053002	2023-07-08	Canada
BG|XBB.1.5|EPI_ISL_18054786|2023-07-08|USA	XBB.1.5	EPI_ISL_18054786	2023-07-08	USA
BG|XBB.1.5|EPI_ISL_18057528|2023-07-08|USA	XBB.1.5	EPI_ISL_18057528	2023-07-08	USA
BG|XBB.1.5|EPI_ISL_18057547|2023-07-08|USA	XBB.1.5	EPI_ISL_18057547	2023-07-08	USA
BG|XBB.1.5.72|EPI_ISL_18065599|2023-07-08|USA	XBB.1.5.72	EPI_ISL_18065599	2023-07-08	USA
BG|XBB.1.5|EPI_ISL_18069647|2023-07-08|USA	XBB.1.5	EPI_ISL_18069647	2023-07-08	USA
BG|XBB.1.5|EPI_ISL_18071855|2023-07-08|Colombia	XBB.1.5	EPI_ISL_18071855	2023-07-08	Colombia
BG|XBB.1.5|EPI_ISL_18075783|2023-07-08|Japan	XBB.1.5	EPI_ISL_18075783	2023-07-08	Japan
BG|XBB.1.5|EPI_ISL_18100967|2023-07-08|Japan	XBB.1.5	EPI_ISL_18100967	2023-07-08	Japan
BG|XBB.1.5|EPI_ISL_18105266|2023-07-08|USA	XBB.1.5	EPI_ISL_18105266	2023-07-08	USA
BG|XBB.1.5.72|EPI_ISL_17996881|2023-07-09|Canada	XBB.1.5.72	EPI_ISL_17996881	2023-07-09	Canada
BG|XBB.1.5|EPI_ISL_18009604|2023-07-09|Sweden	XBB.1.5	EPI_ISL_18009604	2023-07-09	Sweden
BG|XBB.1.5|EPI_ISL_18012532|2023-07-09|Israel	XBB.1.5	EPI_ISL_18012532	2023-07-09	Israel
BG|XBB.1.5|EPI_ISL_18023043|2023-07-09|USA	XBB.1.5	EPI_ISL_18023043	2023-07-09	USA
BG|XBB.1.5|EPI_ISL_18028432|2023-07-09|USA	XBB.1.5	EPI_ISL_18028432	2023-07-09	USA
BG|XBB.1.5|EPI_ISL_18037073|2023-07-09|Canada	XBB.1.5	EPI_ISL_18037073	2023-07-09	Canada
BG|XBB.1.5|EPI_ISL_18037118|2023-07-09|Canada	XBB.1.5	EPI_ISL_18037118	2023-07-09	Canada
BG|XBB.1.5|EPI_ISL_18037119|2023-07-09|Canada	XBB.1.5	EPI_ISL_18037119	2023-07-09	Canada
BG|XBB.1.5|EPI_ISL_18039170|2023-07-09|South_Korea	XBB.1.5	EPI_ISL_18039170	2023-07-09	South_Korea
BG|XBB.1.5|EPI_ISL_18040345|2023-07-09|Japan	XBB.1.5	EPI_ISL_18040345	2023-07-09	Japan
BG|XBB.1.5.72|EPI_ISL_18045652|2023-07-09|USA	XBB.1.5.72	EPI_ISL_18045652	2023-07-09	USA
BG|XBB.1.5|EPI_ISL_18045834|2023-07-09|USA	XBB.1.5	EPI_ISL_18045834	2023-07-09	USA
BG|XBB.1.5|EPI_ISL_18047615|2023-07-09|South_Korea	XBB.1.5	EPI_ISL_18047615	2023-07-09	South_Korea
BG|XBB.1.5|EPI_ISL_18047621|2023-07-09|South_Korea	XBB.1.5	EPI_ISL_18047621	2023-07-09	South_Korea
BG|XBB.1.5|EPI_ISL_18047647|2023-07-09|South_Korea	XBB.1.5	EPI_ISL_18047647	2023-07-09	South_Korea
BG|XBB.1.5|EPI_ISL_18048978|2023-07-09|France	XBB.1.5	EPI_ISL_18048978	2023-07-09	France
BG|XBB.1.5|EPI_ISL_18052382|2023-07-09|Portugal	XBB.1.5	EPI_ISL_18052382	2023-07-09	Portugal
BG|XBB.1.5|EPI_ISL_18052438|2023-07-09|Portugal	XBB.1.5	EPI_ISL_18052438	2023-07-09	Portugal
BG|XBB.1.5|EPI_ISL_18053780|2023-07-09|USA	XBB.1.5	EPI_ISL_18053780	2023-07-09	USA
BG|XBB.1.5|EPI_ISL_18053791|2023-07-09|USA	XBB.1.5	EPI_ISL_18053791	2023-07-09	USA
BG|XBB.1.5|EPI_ISL_18053796|2023-07-09|USA	XBB.1.5	EPI_ISL_18053796	2023-07-09	USA
BG|XBB.1.5|EPI_ISL_18057422|2023-07-09|USA	XBB.1.5	EPI_ISL_18057422	2023-07-09	USA
BG|XBB.1.5|EPI_ISL_18057626|2023-07-09|USA	XBB.1.5	EPI_ISL_18057626	2023-07-09	USA
BG|XBB.1.5|EPI_ISL_18058215|2023-07-09|USA	XBB.1.5	EPI_ISL_18058215	2023-07-09	USA
BG|XBB.1.5|EPI_ISL_18060947|2023-07-09|USA	XBB.1.5	EPI_ISL_18060947	2023-07-09	USA
BG|XBB.1.5|EPI_ISL_18062472|2023-07-09|Canada	XBB.1.5	EPI_ISL_18062472	2023-07-09	Canada
BG|XBB.1.5.77|EPI_ISL_18062941|2023-07-09|South_Korea	XBB.1.5.77	EPI_ISL_18062941	2023-07-09	South_Korea
BG|XBB.1.5|EPI_ISL_18065602|2023-07-09|USA	XBB.1.5	EPI_ISL_18065602	2023-07-09	USA
BG|XBB.1.5|EPI_ISL_18071457|2023-07-09|Costa_Rica	XBB.1.5	EPI_ISL_18071457	2023-07-09	Costa_Rica
BG|XBB.1.5.72|EPI_ISL_18071482|2023-07-09|Costa_Rica	XBB.1.5.72	EPI_ISL_18071482	2023-07-09	Costa_Rica
BG|XBB.1.5|EPI_ISL_18071787|2023-07-09|Colombia	XBB.1.5	EPI_ISL_18071787	2023-07-09	Colombia
BG|XBB.1.5.72|EPI_ISL_18071844|2023-07-09|Colombia	XBB.1.5.72	EPI_ISL_18071844	2023-07-09	Colombia
BG|XBB.1.5.72|EPI_ISL_18076918|2023-07-09|Colombia	XBB.1.5.72	EPI_ISL_18076918	2023-07-09	Colombia
BG|XBB.1.5|EPI_ISL_18078346|2023-07-09|United_Kingdom	XBB.1.5	EPI_ISL_18078346	2023-07-09	United_Kingdom
BG|XBB.1.5.72|EPI_ISL_18080509|2023-07-09|USA	XBB.1.5.72	EPI_ISL_18080509	2023-07-09	USA
BG|XBB.1.5|EPI_ISL_18082020|2023-07-09|USA	XBB.1.5	EPI_ISL_18082020	2023-07-09	USA
BG|XBB.1.5|EPI_ISL_18082203|2023-07-09|USA	XBB.1.5	EPI_ISL_18082203	2023-07-09	USA
BG|XBB.1.5.72|EPI_ISL_18098536|2023-07-09|Spain	XBB.1.5.72	EPI_ISL_18098536	2023-07-09	Spain
BG|XBB.1.5.72|EPI_ISL_18107644|2023-07-09|USA	XBB.1.5.72	EPI_ISL_18107644	2023-07-09	USA
BG|XBB.1.5|EPI_ISL_18107875|2023-07-09|USA	XBB.1.5	EPI_ISL_18107875	2023-07-09	USA
BG|XBB.1.5|EPI_ISL_17994059|2023-07-10|Canada	XBB.1.5	EPI_ISL_17994059	2023-07-10	Canada
BG|XBB.1.5|EPI_ISL_17994079|2023-07-10|Canada	XBB.1.5	EPI_ISL_17994079	2023-07-10	Canada
BG|XBB.1.5.73|EPI_ISL_17994081|2023-07-10|Canada	XBB.1.5.73	EPI_ISL_17994081	2023-07-10	Canada
BG|XBB.1.5|EPI_ISL_17996384|2023-07-10|USA	XBB.1.5	EPI_ISL_17996384	2023-07-10	USA
BG|XBB.1.5.72|EPI_ISL_18010389|2023-07-10|Spain	XBB.1.5.72	EPI_ISL_18010389	2023-07-10	Spain
BG|XBB.1.5.89|EPI_ISL_18012531|2023-07-10|Israel	XBB.1.5.89	EPI_ISL_18012531	2023-07-10	Israel
BG|XBB.1.5|EPI_ISL_18012537|2023-07-10|Israel	XBB.1.5	EPI_ISL_18012537	2023-07-10	Israel
BG|XBB.1.9.1|EPI_ISL_18013181|2023-07-10|Italy	XBB.1.9.1	EPI_ISL_18013181	2023-07-10	Italy
BG|XBB.1.5.72|EPI_ISL_18015758|2023-07-10|Spain	XBB.1.5.72	EPI_ISL_18015758	2023-07-10	Spain
BG|XBB.1.5|EPI_ISL_18028433|2023-07-10|USA	XBB.1.5	EPI_ISL_18028433	2023-07-10	USA
BG|XBB.1.5.72|EPI_ISL_18030436|2023-07-10|Canada	XBB.1.5.72	EPI_ISL_18030436	2023-07-10	Canada
BG|XBB.1.5.92|EPI_ISL_18030445|2023-07-10|Canada	XBB.1.5.92	EPI_ISL_18030445	2023-07-10	Canada
BG|XBB.1.5.72|EPI_ISL_18032356|2023-07-10|Italy	XBB.1.5.72	EPI_ISL_18032356	2023-07-10	Italy
BG|XBB.1.5|EPI_ISL_18037581|2023-07-10|USA	XBB.1.5	EPI_ISL_18037581	2023-07-10	USA
BG|XBB.1.5.47|EPI_ISL_18038646|2023-07-10|USA	XBB.1.5.47	EPI_ISL_18038646	2023-07-10	USA
BG|XBB.1.5|EPI_ISL_18039508|2023-07-10|Japan	XBB.1.5	EPI_ISL_18039508	2023-07-10	Japan
BG|XBB.1.5|EPI_ISL_18040148|2023-07-10|USA	XBB.1.5	EPI_ISL_18040148	2023-07-10	USA
BG|XBB.1.5|EPI_ISL_18040353|2023-07-10|Japan	XBB.1.5	EPI_ISL_18040353	2023-07-10	Japan
BG|XBB.1.5|EPI_ISL_18042063|2023-07-10|Thailand	XBB.1.5	EPI_ISL_18042063	2023-07-10	Thailand
BG|XBB.1.5.72|EPI_ISL_18043478|2023-07-10|Panama	XBB.1.5.72	EPI_ISL_18043478	2023-07-10	Panama
BG|XBB.1.5|EPI_ISL_18044434|2023-07-10|United_Kingdom	XBB.1.5	EPI_ISL_18044434	2023-07-10	United_Kingdom
BG|XBB.1.5|EPI_ISL_18044678|2023-07-10|France	XBB.1.5	EPI_ISL_18044678	2023-07-10	France
BG|XBB.1.5|EPI_ISL_18045344|2023-07-10|USA	XBB.1.5	EPI_ISL_18045344	2023-07-10	USA
BG|XBB.1.5.72|EPI_ISL_18045360|2023-07-10|USA	XBB.1.5.72	EPI_ISL_18045360	2023-07-10	USA
BG|XBB.1.5|EPI_ISL_18045491|2023-07-10|USA	XBB.1.5	EPI_ISL_18045491	2023-07-10	USA
BG|XBB.1.5|EPI_ISL_18045946|2023-07-10|USA	XBB.1.5	EPI_ISL_18045946	2023-07-10	USA
BG|XBB.1.5|EPI_ISL_18046494|2023-07-10|USA	XBB.1.5	EPI_ISL_18046494	2023-07-10	USA
BG|XBB.1.5|EPI_ISL_18049091|2023-07-10|France	XBB.1.5	EPI_ISL_18049091	2023-07-10	France
BG|XBB.1.5.72|EPI_ISL_18049178|2023-07-10|Spain	XBB.1.5.72	EPI_ISL_18049178	2023-07-10	Spain
BG|XBB.1.5|EPI_ISL_18049925|2023-07-10|USA	XBB.1.5	EPI_ISL_18049925	2023-07-10	USA
BG|XBB.1.5|EPI_ISL_18050007|2023-07-10|Germany	XBB.1.5	EPI_ISL_18050007	2023-07-10	Germany
BG|XBB.1.5|EPI_ISL_18050884|2023-07-10|Japan	XBB.1.5	EPI_ISL_18050884	2023-07-10	Japan
BG|XBB.1.5|EPI_ISL_18052021|2023-07-10|Denmark	XBB.1.5	EPI_ISL_18052021	2023-07-10	Denmark
BG|XBB.1.5|EPI_ISL_18052039|2023-07-10|Denmark	XBB.1.5	EPI_ISL_18052039	2023-07-10	Denmark
BG|XBB.1.5|EPI_ISL_18052056|2023-07-10|Denmark	XBB.1.5	EPI_ISL_18052056	2023-07-10	Denmark
BG|XBB.1.5|EPI_ISL_18052388|2023-07-10|Portugal	XBB.1.5	EPI_ISL_18052388	2023-07-10	Portugal
BG|XBB.1.5.72|EPI_ISL_18052893|2023-07-10|Canada	XBB.1.5.72	EPI_ISL_18052893	2023-07-10	Canada
BG|XBB.1.5|EPI_ISL_18052957|2023-07-10|Canada	XBB.1.5	EPI_ISL_18052957	2023-07-10	Canada
BG|XBB.1.5|EPI_ISL_18052961|2023-07-10|Canada	XBB.1.5	EPI_ISL_18052961	2023-07-10	Canada
BG|XBB.1.5.80|EPI_ISL_18052984|2023-07-10|Canada	XBB.1.5.80	EPI_ISL_18052984	2023-07-10	Canada
BG|XBB.1.5|EPI_ISL_18052998|2023-07-10|Canada	XBB.1.5	EPI_ISL_18052998	2023-07-10	Canada
BG|XBB.1.5.80|EPI_ISL_18053003|2023-07-10|Canada	XBB.1.5.80	EPI_ISL_18053003	2023-07-10	Canada
BG|XBB.1.5.72|EPI_ISL_18053809|2023-07-10|USA	XBB.1.5.72	EPI_ISL_18053809	2023-07-10	USA
BG|XBB.1.5|EPI_ISL_18053817|2023-07-10|USA	XBB.1.5	EPI_ISL_18053817	2023-07-10	USA
BG|XBB.1.5|EPI_ISL_18053818|2023-07-10|USA	XBB.1.5	EPI_ISL_18053818	2023-07-10	USA
BG|XBB.1.5|EPI_ISL_18053841|2023-07-10|USA	XBB.1.5	EPI_ISL_18053841	2023-07-10	USA
BG|XBB.1.5|EPI_ISL_18053844|2023-07-10|USA	XBB.1.5	EPI_ISL_18053844	2023-07-10	USA
BG|XBB.1.5|EPI_ISL_18053847|2023-07-10|USA	XBB.1.5	EPI_ISL_18053847	2023-07-10	USA
BG|XBB.1.5|EPI_ISL_18053848|2023-07-10|USA	XBB.1.5	EPI_ISL_18053848	2023-07-10	USA
BG|XBB.1.5.77|EPI_ISL_18053850|2023-07-10|USA	XBB.1.5.77	EPI_ISL_18053850	2023-07-10	USA
BG|XBB.1.5.77|EPI_ISL_18053862|2023-07-10|USA	XBB.1.5.77	EPI_ISL_18053862	2023-07-10	USA
BG|XBB.1.5|EPI_ISL_18055470|2023-07-10|USA	XBB.1.5	EPI_ISL_18055470	2023-07-10	USA
BG|XBB.1.5|EPI_ISL_18057603|2023-07-10|USA	XBB.1.5	EPI_ISL_18057603	2023-07-10	USA
BG|XBB.1.5.100|EPI_ISL_18057650|2023-07-10|USA	XBB.1.5.100	EPI_ISL_18057650	2023-07-10	USA
BG|XBB.1.5|EPI_ISL_18057675|2023-07-10|USA	XBB.1.5	EPI_ISL_18057675	2023-07-10	USA
BG|XBB.1.5|EPI_ISL_18058375|2023-07-10|Japan	XBB.1.5	EPI_ISL_18058375	2023-07-10	Japan
BG|XBB.1.5|EPI_ISL_18059169|2023-07-10|Spain	XBB.1.5	EPI_ISL_18059169	2023-07-10	Spain
BG|XBB.1.5|EPI_ISL_18060246|2023-07-10|Japan	XBB.1.5	EPI_ISL_18060246	2023-07-10	Japan
BG|XBB.1.5|EPI_ISL_18062473|2023-07-10|Canada	XBB.1.5	EPI_ISL_18062473	2023-07-10	Canada
BG|XBB.1.5|EPI_ISL_18067264|2023-07-10|Japan	XBB.1.5	EPI_ISL_18067264	2023-07-10	Japan
BG|XBB.1.5|EPI_ISL_18067438|2023-07-10|South_Korea	XBB.1.5	EPI_ISL_18067438	2023-07-10	South_Korea
BG|XBB.1.5|EPI_ISL_18067483|2023-07-10|South_Korea	XBB.1.5	EPI_ISL_18067483	2023-07-10	South_Korea
BG|XBB.1.5|EPI_ISL_18067510|2023-07-10|South_Korea	XBB.1.5	EPI_ISL_18067510	2023-07-10	South_Korea
BG|XBB.1.5|EPI_ISL_18067553|2023-07-10|South_Korea	XBB.1.5	EPI_ISL_18067553	2023-07-10	South_Korea
BG|XBB.1.5|EPI_ISL_18070044|2023-07-10|France	XBB.1.5	EPI_ISL_18070044	2023-07-10	France
BG|XBB.1.5.72|EPI_ISL_18071319|2023-07-10|USA	XBB.1.5.72	EPI_ISL_18071319	2023-07-10	USA
BG|XBB.1.5|EPI_ISL_18071456|2023-07-10|Costa_Rica	XBB.1.5	EPI_ISL_18071456	2023-07-10	Costa_Rica
BG|XBB.1.5|EPI_ISL_18071458|2023-07-10|Costa_Rica	XBB.1.5	EPI_ISL_18071458	2023-07-10	Costa_Rica
BG|XBB.1.5.77|EPI_ISL_18071801|2023-07-10|Colombia	XBB.1.5.77	EPI_ISL_18071801	2023-07-10	Colombia
BG|XBB.1.5.72|EPI_ISL_18071854|2023-07-10|Colombia	XBB.1.5.72	EPI_ISL_18071854	2023-07-10	Colombia
BG|XBB.1.22|EPI_ISL_18072215|2023-07-10|Italy	XBB.1.22	EPI_ISL_18072215	2023-07-10	Italy
BG|XBB.1.5|EPI_ISL_18072216|2023-07-10|Italy	XBB.1.5	EPI_ISL_18072216	2023-07-10	Italy
BG|XBB.1.5|EPI_ISL_18074210|2023-07-10|China	XBB.1.5	EPI_ISL_18074210	2023-07-10	China
BG|XBB.1.5|EPI_ISL_18075518|2023-07-10|Ecuador	XBB.1.5	EPI_ISL_18075518	2023-07-10	Ecuador
BG|XBB.1.5|EPI_ISL_18075520|2023-07-10|Ecuador	XBB.1.5	EPI_ISL_18075520	2023-07-10	Ecuador
BG|XBB.1.5|EPI_ISL_18075524|2023-07-10|Ecuador	XBB.1.5	EPI_ISL_18075524	2023-07-10	Ecuador
BG|XBB.1.5|EPI_ISL_18076064|2023-07-10|France	XBB.1.5	EPI_ISL_18076064	2023-07-10	France
BG|XBB.1.5.77|EPI_ISL_18076093|2023-07-10|France	XBB.1.5.77	EPI_ISL_18076093	2023-07-10	France
BG|XBB.1.5|EPI_ISL_18076130|2023-07-10|France	XBB.1.5	EPI_ISL_18076130	2023-07-10	France
BG|XBB.1.5|EPI_ISL_18076148|2023-07-10|France	XBB.1.5	EPI_ISL_18076148	2023-07-10	France
BG|XBB.1.5.72|EPI_ISL_18076913|2023-07-10|Colombia	XBB.1.5.72	EPI_ISL_18076913	2023-07-10	Colombia
BG|XBB.1.5.72|EPI_ISL_18076922|2023-07-10|Colombia	XBB.1.5.72	EPI_ISL_18076922	2023-07-10	Colombia
BG|XBB.1.5|EPI_ISL_18077019|2023-07-10|USA	XBB.1.5	EPI_ISL_18077019	2023-07-10	USA
BG|XBB.1.5|EPI_ISL_18080827|2023-07-10|USA	XBB.1.5	EPI_ISL_18080827	2023-07-10	USA
BG|XBB.1.5|EPI_ISL_18080921|2023-07-10|USA	XBB.1.5	EPI_ISL_18080921	2023-07-10	USA
BG|XBB.1.5|EPI_ISL_18080928|2023-07-10|USA	XBB.1.5	EPI_ISL_18080928	2023-07-10	USA
BG|XBB.1.5.81|EPI_ISL_18080953|2023-07-10|USA	XBB.1.5.81	EPI_ISL_18080953	2023-07-10	USA
BG|XBB.1.5|EPI_ISL_18081040|2023-07-10|USA	XBB.1.5	EPI_ISL_18081040	2023-07-10	USA
BG|XBB.1.5|EPI_ISL_18082205|2023-07-10|USA	XBB.1.5	EPI_ISL_18082205	2023-07-10	USA
BG|XBB.1.5.77|EPI_ISL_18090739|2023-07-10|Puerto_Rico	XBB.1.5.77	EPI_ISL_18090739	2023-07-10	Puerto_Rico
BG|XBB.1.5.40|EPI_ISL_18093550|2023-07-10|USA	XBB.1.5.40	EPI_ISL_18093550	2023-07-10	USA
BG|XBB.1.5.103|EPI_ISL_18095354|2023-07-10|Argentina	XBB.1.5.103	EPI_ISL_18095354	2023-07-10	Argentina
BG|XBB.1.5|EPI_ISL_18096964|2023-07-10|Japan	XBB.1.5	EPI_ISL_18096964	2023-07-10	Japan
BG|XBB.1.5|EPI_ISL_18096967|2023-07-10|Japan	XBB.1.5	EPI_ISL_18096967	2023-07-10	Japan
BG|XBB.1.5|EPI_ISL_18100987|2023-07-10|Japan	XBB.1.5	EPI_ISL_18100987	2023-07-10	Japan
BG|XBB.1.5|EPI_ISL_18108140|2023-07-10|USA	XBB.1.5	EPI_ISL_18108140	2023-07-10	USA
BG|XBB.1.5|EPI_ISL_18108141|2023-07-10|USA	XBB.1.5	EPI_ISL_18108141	2023-07-10	USA
BG|XBB.1.5|EPI_ISL_18108667|2023-07-10|China	XBB.1.5	EPI_ISL_18108667	2023-07-10	China
BG|XBB.1.5|EPI_ISL_17985213|2023-07-11|Spain	XBB.1.5	EPI_ISL_17985213	2023-07-11	Spain
BG|XBB.1.5|EPI_ISL_17996616|2023-07-11|Singapore	XBB.1.5	EPI_ISL_17996616	2023-07-11	Singapore
BG|XBB.1.5|EPI_ISL_17996889|2023-07-11|Canada	XBB.1.5	EPI_ISL_17996889	2023-07-11	Canada
BG|XBB.1.5.77|EPI_ISL_18012509|2023-07-11|Israel	XBB.1.5.77	EPI_ISL_18012509	2023-07-11	Israel
BG|XBB.1.5.77|EPI_ISL_18012527|2023-07-11|Israel	XBB.1.5.77	EPI_ISL_18012527	2023-07-11	Israel
BG|XBB.1.5|EPI_ISL_18015782|2023-07-11|Italy	XBB.1.5	EPI_ISL_18015782	2023-07-11	Italy
BG|XBB.1.5|EPI_ISL_18030637|2023-07-11|USA	XBB.1.5	EPI_ISL_18030637	2023-07-11	USA
BG|XBB.1.5.76|EPI_ISL_18032175|2023-07-11|Italy	XBB.1.5.76	EPI_ISL_18032175	2023-07-11	Italy
BG|XBB.1.5.72|EPI_ISL_18032181|2023-07-11|Italy	XBB.1.5.72	EPI_ISL_18032181	2023-07-11	Italy
BG|XBB.1.5.72|EPI_ISL_18034036|2023-07-11|Switzerland	XBB.1.5.72	EPI_ISL_18034036	2023-07-11	Switzerland
BG|XBB.1.5|EPI_ISL_18034103|2023-07-11|Switzerland	XBB.1.5	EPI_ISL_18034103	2023-07-11	Switzerland
BG|XBB.1.5.72|EPI_ISL_18037610|2023-07-11|USA	XBB.1.5.72	EPI_ISL_18037610	2023-07-11	USA
BG|XBB.1.5|EPI_ISL_18037622|2023-07-11|USA	XBB.1.5	EPI_ISL_18037622	2023-07-11	USA
BG|XBB.1.5|EPI_ISL_18042058|2023-07-11|Thailand	XBB.1.5	EPI_ISL_18042058	2023-07-11	Thailand
BG|XBB.1.5|EPI_ISL_18044409|2023-07-11|United_Kingdom	XBB.1.5	EPI_ISL_18044409	2023-07-11	United_Kingdom
BG|XBB.1.5|EPI_ISL_18044664|2023-07-11|USA	XBB.1.5	EPI_ISL_18044664	2023-07-11	USA
BG|XBB.1.5|EPI_ISL_18044665|2023-07-11|USA	XBB.1.5	EPI_ISL_18044665	2023-07-11	USA
BG|XBB.1.5|EPI_ISL_18044951|2023-07-11|Canary_Islands	XBB.1.5	EPI_ISL_18044951	2023-07-11	Canary_Islands
BG|XBB.1.5|EPI_ISL_18044952|2023-07-11|Canary_Islands	XBB.1.5	EPI_ISL_18044952	2023-07-11	Canary_Islands
BG|XBB.1.5.72|EPI_ISL_18045375|2023-07-11|USA	XBB.1.5.72	EPI_ISL_18045375	2023-07-11	USA
BG|XBB.1.5|EPI_ISL_18045405|2023-07-11|USA	XBB.1.5	EPI_ISL_18045405	2023-07-11	USA
BG|XBB.1.5.72|EPI_ISL_18045564|2023-07-11|USA	XBB.1.5.72	EPI_ISL_18045564	2023-07-11	USA
BG|XBB.1.5|EPI_ISL_18049134|2023-07-11|Spain	XBB.1.5	EPI_ISL_18049134	2023-07-11	Spain
BG|XBB.1.5|EPI_ISL_18050891|2023-07-11|Japan	XBB.1.5	EPI_ISL_18050891	2023-07-11	Japan
BG|XBB.1.5|EPI_ISL_18051813|2023-07-11|Japan	XBB.1.5	EPI_ISL_18051813	2023-07-11	Japan
BG|XBB.1.5|EPI_ISL_18052553|2023-07-11|United_Kingdom	XBB.1.5	EPI_ISL_18052553	2023-07-11	United_Kingdom
BG|XBB.1.5|EPI_ISL_18052972|2023-07-11|Canada	XBB.1.5	EPI_ISL_18052972	2023-07-11	Canada
BG|XBB.1.5|EPI_ISL_18053868|2023-07-11|USA	XBB.1.5	EPI_ISL_18053868	2023-07-11	USA
BG|XBB.1.5.72|EPI_ISL_18053891|2023-07-11|USA	XBB.1.5.72	EPI_ISL_18053891	2023-07-11	USA
BG|XBB.1.5.104|EPI_ISL_18053909|2023-07-11|USA	XBB.1.5.104	EPI_ISL_18053909	2023-07-11	USA
BG|XBB.1.5|EPI_ISL_18054704|2023-07-11|USA	XBB.1.5	EPI_ISL_18054704	2023-07-11	USA
BG|XBB.1.5|EPI_ISL_18054799|2023-07-11|USA	XBB.1.5	EPI_ISL_18054799	2023-07-11	USA
BG|XBB.1.5.105|EPI_ISL_18055480|2023-07-11|USA	XBB.1.5.105	EPI_ISL_18055480	2023-07-11	USA
BG|XBB.1.5.72|EPI_ISL_18057110|2023-07-11|USA	XBB.1.5.72	EPI_ISL_18057110	2023-07-11	USA
BG|XBB.1.5|EPI_ISL_18057575|2023-07-11|USA	XBB.1.5	EPI_ISL_18057575	2023-07-11	USA
BG|XBB.1.5.72|EPI_ISL_18057578|2023-07-11|USA	XBB.1.5.72	EPI_ISL_18057578	2023-07-11	USA
BG|XBB.1.5|EPI_ISL_18057588|2023-07-11|USA	XBB.1.5	EPI_ISL_18057588	2023-07-11	USA
BG|XBB.1.5|EPI_ISL_18057789|2023-07-11|USA	XBB.1.5	EPI_ISL_18057789	2023-07-11	USA
BG|XBB.1.5|EPI_ISL_18059172|2023-07-11|Spain	XBB.1.5	EPI_ISL_18059172	2023-07-11	Spain
BG|XBB.1.5.38|EPI_ISL_18062972|2023-07-11|South_Korea	XBB.1.5.38	EPI_ISL_18062972	2023-07-11	South_Korea
BG|XBB.1.5|EPI_ISL_18063102|2023-07-11|South_Korea	XBB.1.5	EPI_ISL_18063102	2023-07-11	South_Korea
BG|XBB.1.5|EPI_ISL_18067589|2023-07-11|South_Korea	XBB.1.5	EPI_ISL_18067589	2023-07-11	South_Korea
BG|XBB.1.5|EPI_ISL_18067608|2023-07-11|South_Korea	XBB.1.5	EPI_ISL_18067608	2023-07-11	South_Korea
BG|XBB.1.5.77|EPI_ISL_18067693|2023-07-11|South_Korea	XBB.1.5.77	EPI_ISL_18067693	2023-07-11	South_Korea
BG|XBB.1.5|EPI_ISL_18067716|2023-07-11|South_Korea	XBB.1.5	EPI_ISL_18067716	2023-07-11	South_Korea
BG|XBB.1.5.77|EPI_ISL_18067721|2023-07-11|South_Korea	XBB.1.5.77	EPI_ISL_18067721	2023-07-11	South_Korea
BG|XBB.1.5.104|EPI_ISL_18067748|2023-07-11|South_Korea	XBB.1.5.104	EPI_ISL_18067748	2023-07-11	South_Korea
BG|XBB.1.5.72|EPI_ISL_18067771|2023-07-11|South_Korea	XBB.1.5.72	EPI_ISL_18067771	2023-07-11	South_Korea
BG|XBB.1.5.73|EPI_ISL_18067797|2023-07-11|South_Korea	XBB.1.5.73	EPI_ISL_18067797	2023-07-11	South_Korea
BG|XBB.1.5|EPI_ISL_18069682|2023-07-11|USA	XBB.1.5	EPI_ISL_18069682	2023-07-11	USA
BG|XBB.1.5|EPI_ISL_18069699|2023-07-11|USA	XBB.1.5	EPI_ISL_18069699	2023-07-11	USA
BG|XBB.1.5|EPI_ISL_18069755|2023-07-11|USA	XBB.1.5	EPI_ISL_18069755	2023-07-11	USA
BG|XBB.1.5|EPI_ISL_18069776|2023-07-11|USA	XBB.1.5	EPI_ISL_18069776	2023-07-11	USA
BG|XBB.1.5.89|EPI_ISL_18069897|2023-07-11|USA	XBB.1.5.89	EPI_ISL_18069897	2023-07-11	USA
BG|XBB.1.5.72|EPI_ISL_18069974|2023-07-11|USA	XBB.1.5.72	EPI_ISL_18069974	2023-07-11	USA
BG|XBB.1.5|EPI_ISL_18071460|2023-07-11|Costa_Rica	XBB.1.5	EPI_ISL_18071460	2023-07-11	Costa_Rica
BG|XBB.1.5.72|EPI_ISL_18071496|2023-07-11|Costa_Rica	XBB.1.5.72	EPI_ISL_18071496	2023-07-11	Costa_Rica
BG|XBB.1.5.76|EPI_ISL_18071497|2023-07-11|Costa_Rica	XBB.1.5.76	EPI_ISL_18071497	2023-07-11	Costa_Rica
BG|XBB.1.5.72|EPI_ISL_18071845|2023-07-11|Colombia	XBB.1.5.72	EPI_ISL_18071845	2023-07-11	Colombia
BG|XBB.1.5|EPI_ISL_18074212|2023-07-11|China	XBB.1.5	EPI_ISL_18074212	2023-07-11	China
BG|XBB.1.5|EPI_ISL_18074213|2023-07-11|China	XBB.1.5	EPI_ISL_18074213	2023-07-11	China
BG|XBB.1.5|EPI_ISL_18075793|2023-07-11|Japan	XBB.1.5	EPI_ISL_18075793	2023-07-11	Japan
BG|XBB.1.5|EPI_ISL_18075794|2023-07-11|Japan	XBB.1.5	EPI_ISL_18075794	2023-07-11	Japan
BG|XBB.1.5.55|EPI_ISL_18075795|2023-07-11|Japan	XBB.1.5.55	EPI_ISL_18075795	2023-07-11	Japan
BG|XBB.1.5|EPI_ISL_18076898|2023-07-11|Colombia	XBB.1.5	EPI_ISL_18076898	2023-07-11	Colombia
BG|XBB.1.5.72|EPI_ISL_18076923|2023-07-11|Colombia	XBB.1.5.72	EPI_ISL_18076923	2023-07-11	Colombia
BG|XBB.1.5.77|EPI_ISL_18076940|2023-07-11|Colombia	XBB.1.5.77	EPI_ISL_18076940	2023-07-11	Colombia
BG|XBB.1.5.77|EPI_ISL_18076942|2023-07-11|Colombia	XBB.1.5.77	EPI_ISL_18076942	2023-07-11	Colombia
BG|XBB.1.5.86|EPI_ISL_18078900|2023-07-11|Brazil	XBB.1.5.86	EPI_ISL_18078900	2023-07-11	Brazil
BG|XBB.1.5|EPI_ISL_18093317|2023-07-11|USA	XBB.1.5	EPI_ISL_18093317	2023-07-11	USA
BG|XBB.1.5|EPI_ISL_18096885|2023-07-11|Canary_Islands	XBB.1.5	EPI_ISL_18096885	2023-07-11	Canary_Islands
BG|XBB.1.5|EPI_ISL_18097791|2023-07-11|Japan	XBB.1.5	EPI_ISL_18097791	2023-07-11	Japan
BG|XBB.1.5|EPI_ISL_18101634|2023-07-11|Argentina	XBB.1.5	EPI_ISL_18101634	2023-07-11	Argentina
BG|XBB.1.5|EPI_ISL_18106862|2023-07-11|Spain	XBB.1.5	EPI_ISL_18106862	2023-07-11	Spain
BG|XBB.1.5.72|EPI_ISL_18110087|2023-07-11|USA	XBB.1.5.72	EPI_ISL_18110087	2023-07-11	USA
BG|XBB.1.5|EPI_ISL_18110089|2023-07-11|USA	XBB.1.5	EPI_ISL_18110089	2023-07-11	USA
BG|XBB.1.5.73|EPI_ISL_17994108|2023-07-12|Canada	XBB.1.5.73	EPI_ISL_17994108	2023-07-12	Canada
BG|XBB.1.5.73|EPI_ISL_17994109|2023-07-12|Canada	XBB.1.5.73	EPI_ISL_17994109	2023-07-12	Canada
BG|XBB.1.5|EPI_ISL_17996890|2023-07-12|Canada	XBB.1.5	EPI_ISL_17996890	2023-07-12	Canada
BG|XBB.1.5.97|EPI_ISL_17999436|2023-07-12|Australia	XBB.1.5.97	EPI_ISL_17999436	2023-07-12	Australia
BG|XBB.1.5.72|EPI_ISL_18008619|2023-07-12|Spain	XBB.1.5.72	EPI_ISL_18008619	2023-07-12	Spain
BG|XBB.1.5|EPI_ISL_18012392|2023-07-12|Italy	XBB.1.5	EPI_ISL_18012392	2023-07-12	Italy
BG|XBB.1.5|EPI_ISL_18012543|2023-07-12|Israel	XBB.1.5	EPI_ISL_18012543	2023-07-12	Israel
BG|XBB.1.5.77|EPI_ISL_18028438|2023-07-12|USA	XBB.1.5.77	EPI_ISL_18028438	2023-07-12	USA
BG|XBB.1.5.72|EPI_ISL_18032176|2023-07-12|Italy	XBB.1.5.72	EPI_ISL_18032176	2023-07-12	Italy
BG|XBB.1.5|EPI_ISL_18037626|2023-07-12|USA	XBB.1.5	EPI_ISL_18037626	2023-07-12	USA
BG|XBB.1.5|EPI_ISL_18037652|2023-07-12|USA	XBB.1.5	EPI_ISL_18037652	2023-07-12	USA
BG|XBB.1.5|EPI_ISL_18038401|2023-07-12|Dominican_Republic	XBB.1.5	EPI_ISL_18038401	2023-07-12	Dominican_Republic
BG|XBB.1.5|EPI_ISL_18038405|2023-07-12|Dominican_Republic	XBB.1.5	EPI_ISL_18038405	2023-07-12	Dominican_Republic
BG|XBB.1.5|EPI_ISL_18038428|2023-07-12|Dominican_Republic	XBB.1.5	EPI_ISL_18038428	2023-07-12	Dominican_Republic
BG|XBB.1.5.95|EPI_ISL_18040155|2023-07-12|USA	XBB.1.5.95	EPI_ISL_18040155	2023-07-12	USA
BG|XBB.1.5|EPI_ISL_18044405|2023-07-12|United_Kingdom	XBB.1.5	EPI_ISL_18044405	2023-07-12	United_Kingdom
BG|XBB.1.5|EPI_ISL_18044414|2023-07-12|United_Kingdom	XBB.1.5	EPI_ISL_18044414	2023-07-12	United_Kingdom
BG|XBB.1.5.105|EPI_ISL_18044426|2023-07-12|United_Kingdom	XBB.1.5.105	EPI_ISL_18044426	2023-07-12	United_Kingdom
BG|XBB.1.5|EPI_ISL_18044667|2023-07-12|USA	XBB.1.5	EPI_ISL_18044667	2023-07-12	USA
BG|XBB.1.5|EPI_ISL_18044963|2023-07-12|Canary_Islands	XBB.1.5	EPI_ISL_18044963	2023-07-12	Canary_Islands
BG|XBB.1.5|EPI_ISL_18045362|2023-07-12|USA	XBB.1.5	EPI_ISL_18045362	2023-07-12	USA
BG|XBB.1.5|EPI_ISL_18045621|2023-07-12|USA	XBB.1.5	EPI_ISL_18045621	2023-07-12	USA
BG|XBB.1.5|EPI_ISL_18045654|2023-07-12|USA	XBB.1.5	EPI_ISL_18045654	2023-07-12	USA
BG|XBB.1.5|EPI_ISL_18046457|2023-07-12|USA	XBB.1.5	EPI_ISL_18046457	2023-07-12	USA
BG|XBB.1.5|EPI_ISL_18048832|2023-07-12|Japan	XBB.1.5	EPI_ISL_18048832	2023-07-12	Japan
BG|XBB.1.5.86|EPI_ISL_18052310|2023-07-12|Portugal	XBB.1.5.86	EPI_ISL_18052310	2023-07-12	Portugal
BG|XBB.1.5|EPI_ISL_18052375|2023-07-12|Portugal	XBB.1.5	EPI_ISL_18052375	2023-07-12	Portugal
BG|XBB.1.5.72|EPI_ISL_18052768|2023-07-12|United_Kingdom	XBB.1.5.72	EPI_ISL_18052768	2023-07-12	United_Kingdom
BG|XBB.1.5.72|EPI_ISL_18053921|2023-07-12|USA	XBB.1.5.72	EPI_ISL_18053921	2023-07-12	USA
BG|XBB.1.5|EPI_ISL_18053928|2023-07-12|USA	XBB.1.5	EPI_ISL_18053928	2023-07-12	USA
BG|XBB.1.5|EPI_ISL_18053953|2023-07-12|USA	XBB.1.5	EPI_ISL_18053953	2023-07-12	USA
BG|XBB.1.5|EPI_ISL_18053957|2023-07-12|USA	XBB.1.5	EPI_ISL_18053957	2023-07-12	USA
BG|XBB.1.5|EPI_ISL_18053963|2023-07-12|USA	XBB.1.5	EPI_ISL_18053963	2023-07-12	USA
BG|XBB.1.5|EPI_ISL_18054739|2023-07-12|USA	XBB.1.5	EPI_ISL_18054739	2023-07-12	USA
BG|XBB.1.5|EPI_ISL_18054740|2023-07-12|USA	XBB.1.5	EPI_ISL_18054740	2023-07-12	USA
BG|XBB.1.5.77|EPI_ISL_18055496|2023-07-12|USA	XBB.1.5.77	EPI_ISL_18055496	2023-07-12	USA
BG|XBB.1.5.72|EPI_ISL_18057025|2023-07-12|USA	XBB.1.5.72	EPI_ISL_18057025	2023-07-12	USA
BG|XBB.1.5|EPI_ISL_18057047|2023-07-12|USA	XBB.1.5	EPI_ISL_18057047	2023-07-12	USA
BG|XBB.1.5|EPI_ISL_18057055|2023-07-12|USA	XBB.1.5	EPI_ISL_18057055	2023-07-12	USA
BG|XBB.1.5.72|EPI_ISL_18057085|2023-07-12|USA	XBB.1.5.72	EPI_ISL_18057085	2023-07-12	USA
BG|XBB.1.5|EPI_ISL_18057089|2023-07-12|USA	XBB.1.5	EPI_ISL_18057089	2023-07-12	USA
BG|XBB.1.5|EPI_ISL_18057102|2023-07-12|USA	XBB.1.5	EPI_ISL_18057102	2023-07-12	USA
BG|XBB.1.5|EPI_ISL_18057117|2023-07-12|USA	XBB.1.5	EPI_ISL_18057117	2023-07-12	USA
BG|XBB.1.5|EPI_ISL_18057155|2023-07-12|USA	XBB.1.5	EPI_ISL_18057155	2023-07-12	USA
BG|XBB.1.5.72|EPI_ISL_18057170|2023-07-12|USA	XBB.1.5.72	EPI_ISL_18057170	2023-07-12	USA
BG|XBB.1.5|EPI_ISL_18057532|2023-07-12|USA	XBB.1.5	EPI_ISL_18057532	2023-07-12	USA
BG|XBB.1.5|EPI_ISL_18057569|2023-07-12|USA	XBB.1.5	EPI_ISL_18057569	2023-07-12	USA
BG|XBB.1.22|EPI_ISL_18057577|2023-07-12|USA	XBB.1.22	EPI_ISL_18057577	2023-07-12	USA
BG|XBB.1.5|EPI_ISL_18057580|2023-07-12|USA	XBB.1.5	EPI_ISL_18057580	2023-07-12	USA
BG|XBB.1.5|EPI_ISL_18057597|2023-07-12|USA	XBB.1.5	EPI_ISL_18057597	2023-07-12	USA
BG|XBB.1.5|EPI_ISL_18057605|2023-07-12|USA	XBB.1.5	EPI_ISL_18057605	2023-07-12	USA
BG|XBB.1.5|EPI_ISL_18057791|2023-07-12|USA	XBB.1.5	EPI_ISL_18057791	2023-07-12	USA
BG|XBB.1.5|EPI_ISL_18058242|2023-07-12|Dominican_Republic	XBB.1.5	EPI_ISL_18058242	2023-07-12	Dominican_Republic
BG|XBB.1.5|EPI_ISL_18058243|2023-07-12|Dominican_Republic	XBB.1.5	EPI_ISL_18058243	2023-07-12	Dominican_Republic
BG|XBB.1.5|EPI_ISL_18060319|2023-07-12|Australia	XBB.1.5	EPI_ISL_18060319	2023-07-12	Australia
BG|XBB.1.5|EPI_ISL_18065595|2023-07-12|USA	XBB.1.5	EPI_ISL_18065595	2023-07-12	USA
BG|XBB.1.5|EPI_ISL_18065831|2023-07-12|Japan	XBB.1.5	EPI_ISL_18065831	2023-07-12	Japan
BG|XBB.1.5|EPI_ISL_18066389|2023-07-12|Japan	XBB.1.5	EPI_ISL_18066389	2023-07-12	Japan
BG|XBB.1.5.73|EPI_ISL_18067833|2023-07-12|South_Korea	XBB.1.5.73	EPI_ISL_18067833	2023-07-12	South_Korea
BG|XBB.1.5.97|EPI_ISL_18067974|2023-07-12|Australia	XBB.1.5.97	EPI_ISL_18067974	2023-07-12	Australia
BG|XBB.1.5|EPI_ISL_18068008|2023-07-12|South_Korea	XBB.1.5	EPI_ISL_18068008	2023-07-12	South_Korea
BG|XBB.1.5|EPI_ISL_18069680|2023-07-12|USA	XBB.1.5	EPI_ISL_18069680	2023-07-12	USA
BG|XBB.1.5|EPI_ISL_18069855|2023-07-12|USA	XBB.1.5	EPI_ISL_18069855	2023-07-12	USA
BG|XBB.1.5|EPI_ISL_18069960|2023-07-12|USA	XBB.1.5	EPI_ISL_18069960	2023-07-12	USA
BG|XBB.1.5|EPI_ISL_18071353|2023-07-12|USA	XBB.1.5	EPI_ISL_18071353	2023-07-12	USA
BG|XBB.1.5|EPI_ISL_18071444|2023-07-12|Costa_Rica	XBB.1.5	EPI_ISL_18071444	2023-07-12	Costa_Rica
BG|XBB.1.5.77|EPI_ISL_18071462|2023-07-12|Costa_Rica	XBB.1.5.77	EPI_ISL_18071462	2023-07-12	Costa_Rica
BG|XBB.1.5|EPI_ISL_18071465|2023-07-12|Costa_Rica	XBB.1.5	EPI_ISL_18071465	2023-07-12	Costa_Rica
BG|XBB.1.5.72|EPI_ISL_18071856|2023-07-12|Colombia	XBB.1.5.72	EPI_ISL_18071856	2023-07-12	Colombia
BG|XBB.1.5.92|EPI_ISL_18075517|2023-07-12|Ecuador	XBB.1.5.92	EPI_ISL_18075517	2023-07-12	Ecuador
BG|XBB.1.5|EPI_ISL_18075519|2023-07-12|Ecuador	XBB.1.5	EPI_ISL_18075519	2023-07-12	Ecuador
BG|XBB.1.5|EPI_ISL_18076014|2023-07-12|France	XBB.1.5	EPI_ISL_18076014	2023-07-12	France
BG|XBB.1.5.77|EPI_ISL_18076946|2023-07-12|Colombia	XBB.1.5.77	EPI_ISL_18076946	2023-07-12	Colombia
BG|XBB.1.5|EPI_ISL_18076956|2023-07-12|USA	XBB.1.5	EPI_ISL_18076956	2023-07-12	USA
BG|XBB.1.5.72|EPI_ISL_18077006|2023-07-12|USA	XBB.1.5.72	EPI_ISL_18077006	2023-07-12	USA
BG|XBB.1.5.72|EPI_ISL_18080646|2023-07-12|USA	XBB.1.5.72	EPI_ISL_18080646	2023-07-12	USA
BG|XBB.1.5|EPI_ISL_18081331|2023-07-12|USA	XBB.1.5	EPI_ISL_18081331	2023-07-12	USA
BG|XBB.1.5|EPI_ISL_18082208|2023-07-12|USA	XBB.1.5	EPI_ISL_18082208	2023-07-12	USA
BG|XBB.1.5|EPI_ISL_18082209|2023-07-12|USA	XBB.1.5	EPI_ISL_18082209	2023-07-12	USA
BG|XBB.1.5|EPI_ISL_18093322|2023-07-12|USA	XBB.1.5	EPI_ISL_18093322	2023-07-12	USA
BG|XBB.1.5|EPI_ISL_18096980|2023-07-12|Japan	XBB.1.5	EPI_ISL_18096980	2023-07-12	Japan
BG|XBB.1.5|EPI_ISL_18096983|2023-07-12|Japan	XBB.1.5	EPI_ISL_18096983	2023-07-12	Japan
BG|XBB.1.5.90|EPI_ISL_18097793|2023-07-12|Japan	XBB.1.5.90	EPI_ISL_18097793	2023-07-12	Japan
BG|XBB.1.5|EPI_ISL_18099425|2023-07-12|Guatemala	XBB.1.5	EPI_ISL_18099425	2023-07-12	Guatemala
BG|XBB.1.5|EPI_ISL_18105267|2023-07-12|USA	XBB.1.5	EPI_ISL_18105267	2023-07-12	USA
BG|XBB.1.5|EPI_ISL_18106442|2023-07-12|Finland	XBB.1.5	EPI_ISL_18106442	2023-07-12	Finland
BG|XBB.1.5.105|EPI_ISL_18110744|2023-07-12|USA	XBB.1.5.105	EPI_ISL_18110744	2023-07-12	USA
BG|XBB.1.5|EPI_ISL_18110822|2023-07-12|USA	XBB.1.5	EPI_ISL_18110822	2023-07-12	USA
BG|XBB.1.5|EPI_ISL_18113495|2023-07-12|Spain	XBB.1.5	EPI_ISL_18113495	2023-07-12	Spain
BG|XBB.1.5.72|EPI_ISL_17990586|2023-07-13|Sweden	XBB.1.5.72	EPI_ISL_17990586	2023-07-13	Sweden
BG|XBB.1.5|EPI_ISL_17990592|2023-07-13|Sweden	XBB.1.5	EPI_ISL_17990592	2023-07-13	Sweden
BG|XBB.1.5.104|EPI_ISL_18008616|2023-07-13|Spain	XBB.1.5.104	EPI_ISL_18008616	2023-07-13	Spain
BG|XBB.1.5.72|EPI_ISL_18022450|2023-07-13|USA	XBB.1.5.72	EPI_ISL_18022450	2023-07-13	USA
BG|XBB.1.5|EPI_ISL_18022452|2023-07-13|USA	XBB.1.5	EPI_ISL_18022452	2023-07-13	USA
BG|XBB.1.5.77|EPI_ISL_18022455|2023-07-13|USA	XBB.1.5.77	EPI_ISL_18022455	2023-07-13	USA
BG|XBB.1.5|EPI_ISL_18022457|2023-07-13|USA	XBB.1.5	EPI_ISL_18022457	2023-07-13	USA
BG|XBB.1.5.92|EPI_ISL_18030515|2023-07-13|Canada	XBB.1.5.92	EPI_ISL_18030515	2023-07-13	Canada
BG|XBB.1.5|EPI_ISL_18032342|2023-07-13|Italy	XBB.1.5	EPI_ISL_18032342	2023-07-13	Italy
BG|XBB.1.5.72|EPI_ISL_18033021|2023-07-13|Netherlands	XBB.1.5.72	EPI_ISL_18033021	2023-07-13	Netherlands
BG|XBB.1.5|EPI_ISL_18037660|2023-07-13|USA	XBB.1.5	EPI_ISL_18037660	2023-07-13	USA
BG|XBB.1.5.10|EPI_ISL_18037676|2023-07-13|USA	XBB.1.5.10	EPI_ISL_18037676	2023-07-13	USA
BG|XBB.1.5|EPI_ISL_18041497|2023-07-13|Japan	XBB.1.5	EPI_ISL_18041497	2023-07-13	Japan
BG|XBB.1.5|EPI_ISL_18044670|2023-07-13|USA	XBB.1.5	EPI_ISL_18044670	2023-07-13	USA
BG|XBB.1.5|EPI_ISL_18046467|2023-07-13|USA	XBB.1.5	EPI_ISL_18046467	2023-07-13	USA
BG|XBB.1.5|EPI_ISL_18046471|2023-07-13|USA	XBB.1.5	EPI_ISL_18046471	2023-07-13	USA
BG|XBB.1.5|EPI_ISL_18051975|2023-07-13|Japan	XBB.1.5	EPI_ISL_18051975	2023-07-13	Japan
BG|XBB.1.5|EPI_ISL_18051982|2023-07-13|Japan	XBB.1.5	EPI_ISL_18051982	2023-07-13	Japan
BG|XBB.1.5|EPI_ISL_18052263|2023-07-13|United_Kingdom	XBB.1.5	EPI_ISL_18052263	2023-07-13	United_Kingdom
BG|XBB.1.5|EPI_ISL_18053969|2023-07-13|USA	XBB.1.5	EPI_ISL_18053969	2023-07-13	USA
BG|XBB.1.5|EPI_ISL_18053970|2023-07-13|USA	XBB.1.5	EPI_ISL_18053970	2023-07-13	USA
BG|XBB.1.5|EPI_ISL_18053972|2023-07-13|USA	XBB.1.5	EPI_ISL_18053972	2023-07-13	USA
BG|XBB.1.5.72|EPI_ISL_18053982|2023-07-13|USA	XBB.1.5.72	EPI_ISL_18053982	2023-07-13	USA
BG|XBB.1.5|EPI_ISL_18053988|2023-07-13|USA	XBB.1.5	EPI_ISL_18053988	2023-07-13	USA
BG|XBB.1.5.104|EPI_ISL_18054073|2023-07-13|USA	XBB.1.5.104	EPI_ISL_18054073	2023-07-13	USA
BG|XBB.1.5|EPI_ISL_18055143|2023-07-13|Canada	XBB.1.5	EPI_ISL_18055143	2023-07-13	Canada
BG|XBB.1.5|EPI_ISL_18055144|2023-07-13|Canada	XBB.1.5	EPI_ISL_18055144	2023-07-13	Canada
BG|XBB.1.5|EPI_ISL_18055499|2023-07-13|USA	XBB.1.5	EPI_ISL_18055499	2023-07-13	USA
BG|XBB.1.5|EPI_ISL_18056731|2023-07-13|United_Kingdom	XBB.1.5	EPI_ISL_18056731	2023-07-13	United_Kingdom
BG|XBB.1.5|EPI_ISL_18056911|2023-07-13|Netherlands	XBB.1.5	EPI_ISL_18056911	2023-07-13	Netherlands
BG|XBB.1.5|EPI_ISL_18057099|2023-07-13|USA	XBB.1.5	EPI_ISL_18057099	2023-07-13	USA
BG|XBB.1.9.1|EPI_ISL_18057109|2023-07-13|USA	XBB.1.9.1	EPI_ISL_18057109	2023-07-13	USA
BG|XBB.1.5.72|EPI_ISL_18057576|2023-07-13|USA	XBB.1.5.72	EPI_ISL_18057576	2023-07-13	USA
BG|XBB.1.5.95|EPI_ISL_18057601|2023-07-13|USA	XBB.1.5.95	EPI_ISL_18057601	2023-07-13	USA
BG|XBB.1.5|EPI_ISL_18057807|2023-07-13|USA	XBB.1.5	EPI_ISL_18057807	2023-07-13	USA
BG|XBB.1.5|EPI_ISL_18057817|2023-07-13|USA	XBB.1.5	EPI_ISL_18057817	2023-07-13	USA
BG|XBB.1.5|EPI_ISL_18057818|2023-07-13|USA	XBB.1.5	EPI_ISL_18057818	2023-07-13	USA
BG|XBB.1.5|EPI_ISL_18058208|2023-07-13|USA	XBB.1.5	EPI_ISL_18058208	2023-07-13	USA
BG|XBB.1.5|EPI_ISL_18058398|2023-07-13|Japan	XBB.1.5	EPI_ISL_18058398	2023-07-13	Japan
BG|XBB.1.5|EPI_ISL_18058402|2023-07-13|Japan	XBB.1.5	EPI_ISL_18058402	2023-07-13	Japan
BG|XBB.1.5|EPI_ISL_18059174|2023-07-13|Spain	XBB.1.5	EPI_ISL_18059174	2023-07-13	Spain
BG|XBB.1.5|EPI_ISL_18059715|2023-07-13|Canada	XBB.1.5	EPI_ISL_18059715	2023-07-13	Canada
BG|XBB.1.5.91|EPI_ISL_18065225|2023-07-13|Japan	XBB.1.5.91	EPI_ISL_18065225	2023-07-13	Japan
BG|XBB.1.5|EPI_ISL_18065845|2023-07-13|Japan	XBB.1.5	EPI_ISL_18065845	2023-07-13	Japan
BG|XBB.1.5|EPI_ISL_18069678|2023-07-13|USA	XBB.1.5	EPI_ISL_18069678	2023-07-13	USA
BG|XBB.1.5.72|EPI_ISL_18069758|2023-07-13|USA	XBB.1.5.72	EPI_ISL_18069758	2023-07-13	USA
BG|XBB.1.5.72|EPI_ISL_18069890|2023-07-13|USA	XBB.1.5.72	EPI_ISL_18069890	2023-07-13	USA
BG|XBB.1.5.77|EPI_ISL_18071362|2023-07-13|USA	XBB.1.5.77	EPI_ISL_18071362	2023-07-13	USA
BG|XBB.1.5|EPI_ISL_18071445|2023-07-13|Costa_Rica	XBB.1.5	EPI_ISL_18071445	2023-07-13	Costa_Rica
BG|XBB.1.5|EPI_ISL_18071454|2023-07-13|Costa_Rica	XBB.1.5	EPI_ISL_18071454	2023-07-13	Costa_Rica
BG|XBB.1.5|EPI_ISL_18071464|2023-07-13|Costa_Rica	XBB.1.5	EPI_ISL_18071464	2023-07-13	Costa_Rica
BG|XBB.1.5.77|EPI_ISL_18071789|2023-07-13|Colombia	XBB.1.5.77	EPI_ISL_18071789	2023-07-13	Colombia
BG|XBB.1.5.77|EPI_ISL_18071823|2023-07-13|Colombia	XBB.1.5.77	EPI_ISL_18071823	2023-07-13	Colombia
BG|XBB.1.5|EPI_ISL_18076899|2023-07-13|Colombia	XBB.1.5	EPI_ISL_18076899	2023-07-13	Colombia
BG|XBB.1.5.72|EPI_ISL_18076906|2023-07-13|Colombia	XBB.1.5.72	EPI_ISL_18076906	2023-07-13	Colombia
BG|XBB.1.5.72|EPI_ISL_18076916|2023-07-13|Colombia	XBB.1.5.72	EPI_ISL_18076916	2023-07-13	Colombia
BG|XBB.1.5.72|EPI_ISL_18076924|2023-07-13|Colombia	XBB.1.5.72	EPI_ISL_18076924	2023-07-13	Colombia
BG|XBB.1.5.77|EPI_ISL_18076935|2023-07-13|Colombia	XBB.1.5.77	EPI_ISL_18076935	2023-07-13	Colombia
BG|XBB.1.5.77|EPI_ISL_18076943|2023-07-13|Colombia	XBB.1.5.77	EPI_ISL_18076943	2023-07-13	Colombia
BG|XBB.1.5.77|EPI_ISL_18076945|2023-07-13|Colombia	XBB.1.5.77	EPI_ISL_18076945	2023-07-13	Colombia
BG|XBB.1.5.77|EPI_ISL_18076949|2023-07-13|Colombia	XBB.1.5.77	EPI_ISL_18076949	2023-07-13	Colombia
BG|XBB.1.5.77|EPI_ISL_18076950|2023-07-13|Colombia	XBB.1.5.77	EPI_ISL_18076950	2023-07-13	Colombia
BG|XBB.1.5|EPI_ISL_18081596|2023-07-13|USA	XBB.1.5	EPI_ISL_18081596	2023-07-13	USA
BG|XBB.1.5|EPI_ISL_18090045|2023-07-13|USA	XBB.1.5	EPI_ISL_18090045	2023-07-13	USA
BG|XBB.1.5|EPI_ISL_18107821|2023-07-13|USA	XBB.1.5	EPI_ISL_18107821	2023-07-13	USA
BG|XBB.1.5|EPI_ISL_18118226|2023-07-13|Spain	XBB.1.5	EPI_ISL_18118226	2023-07-13	Spain
BG|XBB.1.5.72|EPI_ISL_18118299|2023-07-13|Spain	XBB.1.5.72	EPI_ISL_18118299	2023-07-13	Spain
MT|BA.2|EPI_ISL_18415832|2023-07-13|Mexico	BA.2	EPI_ISL_18415832	2023-07-13	Mexico
BG|XBB.1.5|EPI_ISL_18030527|2023-07-14|Canada	XBB.1.5	EPI_ISL_18030527	2023-07-14	Canada
BG|XBB.1.5.72|EPI_ISL_18037694|2023-07-14|USA	XBB.1.5.72	EPI_ISL_18037694	2023-07-14	USA
BG|XBB.1.5|EPI_ISL_18038425|2023-07-14|Dominican_Republic	XBB.1.5	EPI_ISL_18038425	2023-07-14	Dominican_Republic
BG|XBB.1.5.104|EPI_ISL_18040072|2023-07-14|USA	XBB.1.5.104	EPI_ISL_18040072	2023-07-14	USA
BG|XBB.1.5|EPI_ISL_18041917|2023-07-14|Sweden	XBB.1.5	EPI_ISL_18041917	2023-07-14	Sweden
BG|XBB.1.5|EPI_ISL_18043555|2023-07-14|USA	XBB.1.5	EPI_ISL_18043555	2023-07-14	USA
BG|XBB.1.5|EPI_ISL_18047864|2023-07-14|New_Zealand	XBB.1.5	EPI_ISL_18047864	2023-07-14	New_Zealand
BG|XBB.1.5|EPI_ISL_18049950|2023-07-14|USA	XBB.1.5	EPI_ISL_18049950	2023-07-14	USA
BG|XBB.1.5|EPI_ISL_18049951|2023-07-14|USA	XBB.1.5	EPI_ISL_18049951	2023-07-14	USA
BG|XBB.1.5|EPI_ISL_18050941|2023-07-14|Japan	XBB.1.5	EPI_ISL_18050941	2023-07-14	Japan
BG|XBB.1.5|EPI_ISL_18051999|2023-07-14|Japan	XBB.1.5	EPI_ISL_18051999	2023-07-14	Japan
BG|XBB.1.5|EPI_ISL_18052000|2023-07-14|Japan	XBB.1.5	EPI_ISL_18052000	2023-07-14	Japan
BG|XBB.1.5|EPI_ISL_18052534|2023-07-14|United_Kingdom	XBB.1.5	EPI_ISL_18052534	2023-07-14	United_Kingdom
BG|XBB.1.5|EPI_ISL_18055515|2023-07-14|USA	XBB.1.5	EPI_ISL_18055515	2023-07-14	USA
BG|XBB.1.5|EPI_ISL_18055518|2023-07-14|USA	XBB.1.5	EPI_ISL_18055518	2023-07-14	USA
BG|XBB.1.5|EPI_ISL_18057041|2023-07-14|USA	XBB.1.5	EPI_ISL_18057041	2023-07-14	USA
BG|XBB.1.5|EPI_ISL_18057161|2023-07-14|USA	XBB.1.5	EPI_ISL_18057161	2023-07-14	USA
BG|XBB.1.5|EPI_ISL_18057594|2023-07-14|USA	XBB.1.5	EPI_ISL_18057594	2023-07-14	USA
BG|XBB.1.5|EPI_ISL_18057672|2023-07-14|USA	XBB.1.5	EPI_ISL_18057672	2023-07-14	USA
BG|XBB.1.5|EPI_ISL_18057822|2023-07-14|USA	XBB.1.5	EPI_ISL_18057822	2023-07-14	USA
BG|XBB.1.5|EPI_ISL_18059197|2023-07-14|Cabo_Verde	XBB.1.5	EPI_ISL_18059197	2023-07-14	Cabo_Verde
BG|XBB.1.5|EPI_ISL_18060338|2023-07-14|Australia	XBB.1.5	EPI_ISL_18060338	2023-07-14	Australia
BG|XBB.1.5.90|EPI_ISL_18060516|2023-07-14|Japan	XBB.1.5.90	EPI_ISL_18060516	2023-07-14	Japan
BG|XBB.1.5|EPI_ISL_18060992|2023-07-14|USA	XBB.1.5	EPI_ISL_18060992	2023-07-14	USA
BG|XBB.1.5.72|EPI_ISL_18060993|2023-07-14|USA	XBB.1.5.72	EPI_ISL_18060993	2023-07-14	USA
BG|XBB.1.5.72|EPI_ISL_18061008|2023-07-14|USA	XBB.1.5.72	EPI_ISL_18061008	2023-07-14	USA
BG|XBB.1.5|EPI_ISL_18068080|2023-07-14|South_Korea	XBB.1.5	EPI_ISL_18068080	2023-07-14	South_Korea
BG|XBB.1.5|EPI_ISL_18068092|2023-07-14|South_Korea	XBB.1.5	EPI_ISL_18068092	2023-07-14	South_Korea
BG|XBB.1.5|EPI_ISL_18068160|2023-07-14|South_Korea	XBB.1.5	EPI_ISL_18068160	2023-07-14	South_Korea
BG|XBB.1.5|EPI_ISL_18069634|2023-07-14|USA	XBB.1.5	EPI_ISL_18069634	2023-07-14	USA
BG|XBB.1.5.72|EPI_ISL_18069726|2023-07-14|USA	XBB.1.5.72	EPI_ISL_18069726	2023-07-14	USA
BG|XBB.1.5.77|EPI_ISL_18069795|2023-07-14|USA	XBB.1.5.77	EPI_ISL_18069795	2023-07-14	USA
BG|XBB.1.5|EPI_ISL_18069841|2023-07-14|USA	XBB.1.5	EPI_ISL_18069841	2023-07-14	USA
BG|XBB.1.5|EPI_ISL_18071453|2023-07-14|Costa_Rica	XBB.1.5	EPI_ISL_18071453	2023-07-14	Costa_Rica
BG|XBB.1.5.72|EPI_ISL_18071467|2023-07-14|Costa_Rica	XBB.1.5.72	EPI_ISL_18071467	2023-07-14	Costa_Rica
BG|XBB.1.5|EPI_ISL_18071468|2023-07-14|Costa_Rica	XBB.1.5	EPI_ISL_18071468	2023-07-14	Costa_Rica
BG|XBB.1.5|EPI_ISL_18071476|2023-07-14|Costa_Rica	XBB.1.5	EPI_ISL_18071476	2023-07-14	Costa_Rica
BG|XBB.1.5.72|EPI_ISL_18071809|2023-07-14|Colombia	XBB.1.5.72	EPI_ISL_18071809	2023-07-14	Colombia
BG|XBB.1.5|EPI_ISL_18071857|2023-07-14|Colombia	XBB.1.5	EPI_ISL_18071857	2023-07-14	Colombia
BG|XBB.1.5|EPI_ISL_18073796|2023-07-14|Australia	XBB.1.5	EPI_ISL_18073796	2023-07-14	Australia
BG|XBB.1.5|EPI_ISL_18075516|2023-07-14|Ecuador	XBB.1.5	EPI_ISL_18075516	2023-07-14	Ecuador
BG|XBB.1.5.78|EPI_ISL_18076209|2023-07-14|Ireland	XBB.1.5.78	EPI_ISL_18076209	2023-07-14	Ireland
BG|XBB.1.5.77|EPI_ISL_18076947|2023-07-14|Colombia	XBB.1.5.77	EPI_ISL_18076947	2023-07-14	Colombia
BG|XBB.1.5.77|EPI_ISL_18076951|2023-07-14|Colombia	XBB.1.5.77	EPI_ISL_18076951	2023-07-14	Colombia
BG|XBB.1.5|EPI_ISL_18076968|2023-07-14|USA	XBB.1.5	EPI_ISL_18076968	2023-07-14	USA
BG|XBB.1.5|EPI_ISL_18077330|2023-07-14|USA	XBB.1.5	EPI_ISL_18077330	2023-07-14	USA
BG|XBB.1.5|EPI_ISL_18096991|2023-07-14|Japan	XBB.1.5	EPI_ISL_18096991	2023-07-14	Japan
BG|XBB.1.5|EPI_ISL_18096993|2023-07-14|Japan	XBB.1.5	EPI_ISL_18096993	2023-07-14	Japan
BG|XBB.1.5|EPI_ISL_18099405|2023-07-14|Guatemala	XBB.1.5	EPI_ISL_18099405	2023-07-14	Guatemala
BG|XBB.1.5.72|EPI_ISL_18107473|2023-07-14|USA	XBB.1.5.72	EPI_ISL_18107473	2023-07-14	USA
BG|XBB.1.5.72|EPI_ISL_18114471|2023-07-14|USA	XBB.1.5.72	EPI_ISL_18114471	2023-07-14	USA
BG|XBB.1.5.72|EPI_ISL_18114474|2023-07-14|USA	XBB.1.5.72	EPI_ISL_18114474	2023-07-14	USA
BG|XBB.1.5.73|EPI_ISL_18116392|2023-07-14|South_Korea	XBB.1.5.73	EPI_ISL_18116392	2023-07-14	South_Korea
BG|XBB.1.5|EPI_ISL_18007827|2023-07-15|Italy	XBB.1.5	EPI_ISL_18007827	2023-07-15	Italy
BG|XBB.1.5.86|EPI_ISL_18007830|2023-07-15|Italy	XBB.1.5.86	EPI_ISL_18007830	2023-07-15	Italy
BG|XBB.1.5|EPI_ISL_18007845|2023-07-15|Italy	XBB.1.5	EPI_ISL_18007845	2023-07-15	Italy
BG|XBB.1.33|EPI_ISL_18007846|2023-07-15|Italy	XBB.1.33	EPI_ISL_18007846	2023-07-15	Italy
BG|XBB.1.5|EPI_ISL_18007850|2023-07-15|Italy	XBB.1.5	EPI_ISL_18007850	2023-07-15	Italy
BG|XBB.1.5.98|EPI_ISL_18012829|2023-07-15|USA	XBB.1.5.98	EPI_ISL_18012829	2023-07-15	USA
BG|XBB.1.5.73|EPI_ISL_18030482|2023-07-15|Canada	XBB.1.5.73	EPI_ISL_18030482	2023-07-15	Canada
BG|XBB.1.5.72|EPI_ISL_18030488|2023-07-15|Canada	XBB.1.5.72	EPI_ISL_18030488	2023-07-15	Canada
BG|XBB.1.5|EPI_ISL_18030520|2023-07-15|Canada	XBB.1.5	EPI_ISL_18030520	2023-07-15	Canada
BG|XBB.1.5.73|EPI_ISL_18030564|2023-07-15|Canada	XBB.1.5.73	EPI_ISL_18030564	2023-07-15	Canada
BG|XBB.1.5.106|EPI_ISL_18036916|2023-07-15|USA	XBB.1.5.106	EPI_ISL_18036916	2023-07-15	USA
BG|XBB.1.5.72|EPI_ISL_18037706|2023-07-15|USA	XBB.1.5.72	EPI_ISL_18037706	2023-07-15	USA
BG|XBB.1.5|EPI_ISL_18038292|2023-07-15|Canada	XBB.1.5	EPI_ISL_18038292	2023-07-15	Canada
BG|XBB.1.5|EPI_ISL_18040142|2023-07-15|USA	XBB.1.5	EPI_ISL_18040142	2023-07-15	USA
BG|XBB.1.5.86|EPI_ISL_18042358|2023-07-15|Ireland	XBB.1.5.86	EPI_ISL_18042358	2023-07-15	Ireland
BG|XBB.1.5|EPI_ISL_18050926|2023-07-15|Japan	XBB.1.5	EPI_ISL_18050926	2023-07-15	Japan
BG|XBB.1.5|EPI_ISL_18052489|2023-07-15|United_Kingdom	XBB.1.5	EPI_ISL_18052489	2023-07-15	United_Kingdom
BG|XBB.1.5|EPI_ISL_18052527|2023-07-15|United_Kingdom	XBB.1.5	EPI_ISL_18052527	2023-07-15	United_Kingdom
BG|XBB.1.5|EPI_ISL_18052535|2023-07-15|United_Kingdom	XBB.1.5	EPI_ISL_18052535	2023-07-15	United_Kingdom
BG|XBB.1.5|EPI_ISL_18052592|2023-07-15|United_Kingdom	XBB.1.5	EPI_ISL_18052592	2023-07-15	United_Kingdom
BG|XBB.1.5.72|EPI_ISL_18054017|2023-07-15|USA	XBB.1.5.72	EPI_ISL_18054017	2023-07-15	USA
BG|XBB.1.5|EPI_ISL_18054018|2023-07-15|USA	XBB.1.5	EPI_ISL_18054018	2023-07-15	USA
BG|XBB.1.5.72|EPI_ISL_18056724|2023-07-15|United_Kingdom	XBB.1.5.72	EPI_ISL_18056724	2023-07-15	United_Kingdom
BG|XBB.1.5|EPI_ISL_18057106|2023-07-15|USA	XBB.1.5	EPI_ISL_18057106	2023-07-15	USA
BG|XBB.1.5.73|EPI_ISL_18057552|2023-07-15|USA	XBB.1.5.73	EPI_ISL_18057552	2023-07-15	USA
BG|XBB.1.5.106|EPI_ISL_18057568|2023-07-15|USA	XBB.1.5.106	EPI_ISL_18057568	2023-07-15	USA
BG|XBB.1.5|EPI_ISL_18057572|2023-07-15|USA	XBB.1.5	EPI_ISL_18057572	2023-07-15	USA
BG|XBB.1.5|EPI_ISL_18057619|2023-07-15|USA	XBB.1.5	EPI_ISL_18057619	2023-07-15	USA
BG|XBB.1.5.72|EPI_ISL_18057673|2023-07-15|USA	XBB.1.5.72	EPI_ISL_18057673	2023-07-15	USA
BG|XBB.1.5.72|EPI_ISL_18058024|2023-07-15|Canada	XBB.1.5.72	EPI_ISL_18058024	2023-07-15	Canada
BG|XBB.1.5.100|EPI_ISL_18060584|2023-07-15|USA	XBB.1.5.100	EPI_ISL_18060584	2023-07-15	USA
BG|XBB.1.5|EPI_ISL_18060634|2023-07-15|USA	XBB.1.5	EPI_ISL_18060634	2023-07-15	USA
BG|XBB.1.5|EPI_ISL_18060636|2023-07-15|USA	XBB.1.5	EPI_ISL_18060636	2023-07-15	USA
BG|XBB.1.5|EPI_ISL_18060644|2023-07-15|USA	XBB.1.5	EPI_ISL_18060644	2023-07-15	USA
BG|XBB.1.5|EPI_ISL_18064531|2023-07-15|Thailand	XBB.1.5	EPI_ISL_18064531	2023-07-15	Thailand
BG|XBB.1.5|EPI_ISL_18068165|2023-07-15|South_Korea	XBB.1.5	EPI_ISL_18068165	2023-07-15	South_Korea
BG|XBB.1.5|EPI_ISL_18071452|2023-07-15|Costa_Rica	XBB.1.5	EPI_ISL_18071452	2023-07-15	Costa_Rica
BG|XBB.1.5.72|EPI_ISL_18071831|2023-07-15|Colombia	XBB.1.5.72	EPI_ISL_18071831	2023-07-15	Colombia
BG|XBB.1.5.89|EPI_ISL_18071906|2023-07-15|Italy	XBB.1.5.89	EPI_ISL_18071906	2023-07-15	Italy
BG|XBB.1.5.88|EPI_ISL_18074352|2023-07-15|China	XBB.1.5.88	EPI_ISL_18074352	2023-07-15	China
BG|XBB.1.5|EPI_ISL_18075028|2023-07-15|Sweden	XBB.1.5	EPI_ISL_18075028	2023-07-15	Sweden
BG|XBB.1.5.77|EPI_ISL_18076892|2023-07-15|Colombia	XBB.1.5.77	EPI_ISL_18076892	2023-07-15	Colombia
BG|XBB.1.5.77|EPI_ISL_18076934|2023-07-15|Colombia	XBB.1.5.77	EPI_ISL_18076934	2023-07-15	Colombia
BG|XBB.1.5.72|EPI_ISL_18081424|2023-07-15|USA	XBB.1.5.72	EPI_ISL_18081424	2023-07-15	USA
BG|XBB.1.5|EPI_ISL_18081533|2023-07-15|USA	XBB.1.5	EPI_ISL_18081533	2023-07-15	USA
BG|XBB.1.5|EPI_ISL_18105271|2023-07-15|USA	XBB.1.5	EPI_ISL_18105271	2023-07-15	USA
BG|XBB.1.5|EPI_ISL_18106646|2023-07-15|United_Kingdom	XBB.1.5	EPI_ISL_18106646	2023-07-15	United_Kingdom
BG|XBB.1.5|EPI_ISL_18108150|2023-07-15|USA	XBB.1.5	EPI_ISL_18108150	2023-07-15	USA
BG|XBB.1.5.89|EPI_ISL_18113556|2023-07-15|South_Africa	XBB.1.5.89	EPI_ISL_18113556	2023-07-15	South_Africa
BG|XBB.1.5.72|EPI_ISL_18114451|2023-07-15|USA	XBB.1.5.72	EPI_ISL_18114451	2023-07-15	USA
BG|XBB.1.5.72|EPI_ISL_18114480|2023-07-15|USA	XBB.1.5.72	EPI_ISL_18114480	2023-07-15	USA
BG|XBB.1.5.72|EPI_ISL_18114481|2023-07-15|USA	XBB.1.5.72	EPI_ISL_18114481	2023-07-15	USA
BG|XBB.1.5|EPI_ISL_18030510|2023-07-16|Canada	XBB.1.5	EPI_ISL_18030510	2023-07-16	Canada
BG|XBB.1.5|EPI_ISL_18033514|2023-07-16|USA	XBB.1.5	EPI_ISL_18033514	2023-07-16	USA
BG|XBB.1.5|EPI_ISL_18040064|2023-07-16|USA	XBB.1.5	EPI_ISL_18040064	2023-07-16	USA
BG|XBB.1.5|EPI_ISL_18043552|2023-07-16|USA	XBB.1.5	EPI_ISL_18043552	2023-07-16	USA
BG|XBB.1.5|EPI_ISL_18052383|2023-07-16|Portugal	XBB.1.5	EPI_ISL_18052383	2023-07-16	Portugal
BG|XBB.1.5|EPI_ISL_18055186|2023-07-16|Canada	XBB.1.5	EPI_ISL_18055186	2023-07-16	Canada
BG|XBB.1.5|EPI_ISL_18055533|2023-07-16|USA	XBB.1.5	EPI_ISL_18055533	2023-07-16	USA
BG|XBB.1.5|EPI_ISL_18056744|2023-07-16|United_Kingdom	XBB.1.5	EPI_ISL_18056744	2023-07-16	United_Kingdom
BG|XBB.1.22|EPI_ISL_18057079|2023-07-16|USA	XBB.1.22	EPI_ISL_18057079	2023-07-16	USA
BG|XBB.1.9.1|EPI_ISL_18057539|2023-07-16|USA	XBB.1.9.1	EPI_ISL_18057539	2023-07-16	USA
BG|XBB.1.5|EPI_ISL_18060302|2023-07-16|Japan	XBB.1.5	EPI_ISL_18060302	2023-07-16	Japan
BG|XBB.1.5|EPI_ISL_18060586|2023-07-16|USA	XBB.1.5	EPI_ISL_18060586	2023-07-16	USA
BG|XBB.1.5.72|EPI_ISL_18060962|2023-07-16|USA	XBB.1.5.72	EPI_ISL_18060962	2023-07-16	USA
BG|XBB.1.5.72|EPI_ISL_18062493|2023-07-16|Canada	XBB.1.5.72	EPI_ISL_18062493	2023-07-16	Canada
BG|XBB.1.5|EPI_ISL_18066818|2023-07-16|United_Kingdom	XBB.1.5	EPI_ISL_18066818	2023-07-16	United_Kingdom
BG|XBB.1.5|EPI_ISL_18067903|2023-07-16|South_Korea	XBB.1.5	EPI_ISL_18067903	2023-07-16	South_Korea
BG|XBB.1.5.72|EPI_ISL_18068360|2023-07-16|South_Korea	XBB.1.5.72	EPI_ISL_18068360	2023-07-16	South_Korea
BG|XBB.1.5|EPI_ISL_18068391|2023-07-16|South_Korea	XBB.1.5	EPI_ISL_18068391	2023-07-16	South_Korea
BG|XBB.1.5|EPI_ISL_18068392|2023-07-16|South_Korea	XBB.1.5	EPI_ISL_18068392	2023-07-16	South_Korea
BG|XBB.1.5.77|EPI_ISL_18068436|2023-07-16|South_Korea	XBB.1.5.77	EPI_ISL_18068436	2023-07-16	South_Korea
BG|XBB.1.5|EPI_ISL_18068445|2023-07-16|South_Korea	XBB.1.5	EPI_ISL_18068445	2023-07-16	South_Korea
BG|XBB.1.5|EPI_ISL_18069606|2023-07-16|USA	XBB.1.5	EPI_ISL_18069606	2023-07-16	USA
BG|XBB.1.5|EPI_ISL_18069877|2023-07-16|USA	XBB.1.5	EPI_ISL_18069877	2023-07-16	USA
BG|XBB.1.5|EPI_ISL_18070005|2023-07-16|USA	XBB.1.5	EPI_ISL_18070005	2023-07-16	USA
BG|XBB.1.5|EPI_ISL_18070098|2023-07-16|France	XBB.1.5	EPI_ISL_18070098	2023-07-16	France
BG|XBB.1.5|EPI_ISL_18071448|2023-07-16|Costa_Rica	XBB.1.5	EPI_ISL_18071448	2023-07-16	Costa_Rica
BG|XBB.1.5.77|EPI_ISL_18071791|2023-07-16|Colombia	XBB.1.5.77	EPI_ISL_18071791	2023-07-16	Colombia
BG|XBB.1.5.91|EPI_ISL_18072116|2023-07-16|United_Kingdom	XBB.1.5.91	EPI_ISL_18072116	2023-07-16	United_Kingdom
BG|XBB.1.5|EPI_ISL_18072431|2023-07-16|USA	XBB.1.5	EPI_ISL_18072431	2023-07-16	USA
BG|XBB.1.5|EPI_ISL_18073946|2023-07-16|Canada	XBB.1.5	EPI_ISL_18073946	2023-07-16	Canada
BG|XBB.1.5.77|EPI_ISL_18074019|2023-07-16|Canada	XBB.1.5.77	EPI_ISL_18074019	2023-07-16	Canada
BG|XBB.1.5.72|EPI_ISL_18076917|2023-07-16|Colombia	XBB.1.5.72	EPI_ISL_18076917	2023-07-16	Colombia
BG|XBB.1.5.104|EPI_ISL_18081432|2023-07-16|USA	XBB.1.5.104	EPI_ISL_18081432	2023-07-16	USA
BG|XBB.1.5|EPI_ISL_18081527|2023-07-16|USA	XBB.1.5	EPI_ISL_18081527	2023-07-16	USA
BG|XBB.1.5|EPI_ISL_18081570|2023-07-16|USA	XBB.1.5	EPI_ISL_18081570	2023-07-16	USA
BG|XBB.1.5|EPI_ISL_18093562|2023-07-16|USA	XBB.1.5	EPI_ISL_18093562	2023-07-16	USA
BG|XBB.1.5.89|EPI_ISL_18096900|2023-07-16|Canary_Islands	XBB.1.5.89	EPI_ISL_18096900	2023-07-16	Canary_Islands
BG|XBB.1.5|EPI_ISL_18114461|2023-07-16|USA	XBB.1.5	EPI_ISL_18114461	2023-07-16	USA
BG|XBB.1.5.104|EPI_ISL_18114489|2023-07-16|USA	XBB.1.5.104	EPI_ISL_18114489	2023-07-16	USA
BG|XBB.1.33|EPI_ISL_18015535|2023-07-17|Italy	XBB.1.33	EPI_ISL_18015535	2023-07-17	Italy
BG|XBB.1.5|EPI_ISL_18030566|2023-07-17|Canada	XBB.1.5	EPI_ISL_18030566	2023-07-17	Canada
BG|XBB.1.5.72|EPI_ISL_18030590|2023-07-17|Canada	XBB.1.5.72	EPI_ISL_18030590	2023-07-17	Canada
BG|XBB.1.5|EPI_ISL_18037713|2023-07-17|USA	XBB.1.5	EPI_ISL_18037713	2023-07-17	USA
BG|XBB.1.5.77|EPI_ISL_18037717|2023-07-17|USA	XBB.1.5.77	EPI_ISL_18037717	2023-07-17	USA
BG|XBB.1.5|EPI_ISL_18038293|2023-07-17|Canada	XBB.1.5	EPI_ISL_18038293	2023-07-17	Canada
BG|XBB.1.5|EPI_ISL_18038294|2023-07-17|Canada	XBB.1.5	EPI_ISL_18038294	2023-07-17	Canada
BG|XBB.1.5.72|EPI_ISL_18038305|2023-07-17|Canada	XBB.1.5.72	EPI_ISL_18038305	2023-07-17	Canada
BG|XBB.1.5|EPI_ISL_18046452|2023-07-17|USA	XBB.1.5	EPI_ISL_18046452	2023-07-17	USA
BG|XBB.1.5|EPI_ISL_18046474|2023-07-17|USA	XBB.1.5	EPI_ISL_18046474	2023-07-17	USA
BG|XBB.1.5|EPI_ISL_18049009|2023-07-17|France	XBB.1.5	EPI_ISL_18049009	2023-07-17	France
BG|XBB.1.5.72|EPI_ISL_18049112|2023-07-17|France	XBB.1.5.72	EPI_ISL_18049112	2023-07-17	France
BG|XBB.1.5|EPI_ISL_18049244|2023-07-17|Canada	XBB.1.5	EPI_ISL_18049244	2023-07-17	Canada
BG|XBB.1.5|EPI_ISL_18052061|2023-07-17|Denmark	XBB.1.5	EPI_ISL_18052061	2023-07-17	Denmark
BG|XBB.1.5|EPI_ISL_18052639|2023-07-17|United_Kingdom	XBB.1.5	EPI_ISL_18052639	2023-07-17	United_Kingdom
BG|XBB.1.5|EPI_ISL_18053764|2023-07-17|USA	XBB.1.5	EPI_ISL_18053764	2023-07-17	USA
BG|XBB.1.5.92|EPI_ISL_18055165|2023-07-17|Canada	XBB.1.5.92	EPI_ISL_18055165	2023-07-17	Canada
BG|XBB.1.5.72|EPI_ISL_18055179|2023-07-17|Canada	XBB.1.5.72	EPI_ISL_18055179	2023-07-17	Canada
BG|XBB.1.5.72|EPI_ISL_18055194|2023-07-17|Canada	XBB.1.5.72	EPI_ISL_18055194	2023-07-17	Canada
BG|XBB.1.5.72|EPI_ISL_18055244|2023-07-17|Canada	XBB.1.5.72	EPI_ISL_18055244	2023-07-17	Canada
BG|XBB.1.5|EPI_ISL_18056751|2023-07-17|United_Kingdom	XBB.1.5	EPI_ISL_18056751	2023-07-17	United_Kingdom
BG|XBB.1.5.72|EPI_ISL_18057096|2023-07-17|USA	XBB.1.5.72	EPI_ISL_18057096	2023-07-17	USA
BG|XBB.1.5|EPI_ISL_18057100|2023-07-17|USA	XBB.1.5	EPI_ISL_18057100	2023-07-17	USA
BG|XBB.1.5|EPI_ISL_18057280|2023-07-17|USA	XBB.1.5	EPI_ISL_18057280	2023-07-17	USA
BG|XBB.1.5.72|EPI_ISL_18057329|2023-07-17|USA	XBB.1.5.72	EPI_ISL_18057329	2023-07-17	USA
BG|XBB.1.5|EPI_ISL_18057874|2023-07-17|USA	XBB.1.5	EPI_ISL_18057874	2023-07-17	USA
BG|XBB.1.5|EPI_ISL_18057907|2023-07-17|USA	XBB.1.5	EPI_ISL_18057907	2023-07-17	USA
BG|XBB.1.5|EPI_ISL_18057911|2023-07-17|USA	XBB.1.5	EPI_ISL_18057911	2023-07-17	USA
BG|XBB.1.5|EPI_ISL_18058178|2023-07-17|USA	XBB.1.5	EPI_ISL_18058178	2023-07-17	USA
BG|XBB.1.5|EPI_ISL_18059698|2023-07-17|Canada	XBB.1.5	EPI_ISL_18059698	2023-07-17	Canada
BG|XBB.1.5|EPI_ISL_18060667|2023-07-17|USA	XBB.1.5	EPI_ISL_18060667	2023-07-17	USA
BG|XBB.1.5|EPI_ISL_18064678|2023-07-17|USA	XBB.1.5	EPI_ISL_18064678	2023-07-17	USA
BG|XBB.1.5|EPI_ISL_18065358|2023-07-17|USA	XBB.1.5	EPI_ISL_18065358	2023-07-17	USA
BG|XBB.1.5.72|EPI_ISL_18065598|2023-07-17|USA	XBB.1.5.72	EPI_ISL_18065598	2023-07-17	USA
BG|XBB.1.5|EPI_ISL_18066329|2023-07-17|Japan	XBB.1.5	EPI_ISL_18066329	2023-07-17	Japan
BG|XBB.1.5|EPI_ISL_18066819|2023-07-17|United_Kingdom	XBB.1.5	EPI_ISL_18066819	2023-07-17	United_Kingdom
BG|XBB.1.5|EPI_ISL_18066902|2023-07-17|United_Kingdom	XBB.1.5	EPI_ISL_18066902	2023-07-17	United_Kingdom
BG|XBB.1.5|EPI_ISL_18069597|2023-07-17|USA	XBB.1.5	EPI_ISL_18069597	2023-07-17	USA
BG|XBB.1.5.72|EPI_ISL_18069633|2023-07-17|USA	XBB.1.5.72	EPI_ISL_18069633	2023-07-17	USA
BG|XBB.1.5.40|EPI_ISL_18069673|2023-07-17|USA	XBB.1.5.40	EPI_ISL_18069673	2023-07-17	USA
BG|XBB.1.5|EPI_ISL_18069694|2023-07-17|USA	XBB.1.5	EPI_ISL_18069694	2023-07-17	USA
BG|XBB.1.5|EPI_ISL_18069952|2023-07-17|USA	XBB.1.5	EPI_ISL_18069952	2023-07-17	USA
BG|XBB.1.5|EPI_ISL_18069962|2023-07-17|USA	XBB.1.5	EPI_ISL_18069962	2023-07-17	USA
BG|XBB.1.5|EPI_ISL_18070021|2023-07-17|USA	XBB.1.5	EPI_ISL_18070021	2023-07-17	USA
BG|XBB.1.5|EPI_ISL_18070065|2023-07-17|France	XBB.1.5	EPI_ISL_18070065	2023-07-17	France
BG|XBB.1.5.6|EPI_ISL_18070072|2023-07-17|France	XBB.1.5.6	EPI_ISL_18070072	2023-07-17	France
BG|XBB.1.5|EPI_ISL_18070074|2023-07-17|France	XBB.1.5	EPI_ISL_18070074	2023-07-17	France
BG|XBB.1.5.72|EPI_ISL_18071369|2023-07-17|USA	XBB.1.5.72	EPI_ISL_18071369	2023-07-17	USA
BG|XBB.1.5|EPI_ISL_18071477|2023-07-17|Costa_Rica	XBB.1.5	EPI_ISL_18071477	2023-07-17	Costa_Rica
BG|XBB.1.5.72|EPI_ISL_18071817|2023-07-17|Colombia	XBB.1.5.72	EPI_ISL_18071817	2023-07-17	Colombia
BG|XBB.1.5.105|EPI_ISL_18071886|2023-07-17|Denmark	XBB.1.5.105	EPI_ISL_18071886	2023-07-17	Denmark
BG|XBB.1.5|EPI_ISL_18072020|2023-07-17|United_Kingdom	XBB.1.5	EPI_ISL_18072020	2023-07-17	United_Kingdom
BG|XBB.1.5|EPI_ISL_18072469|2023-07-17|USA	XBB.1.5	EPI_ISL_18072469	2023-07-17	USA
BG|XBB.1.5|EPI_ISL_18072494|2023-07-17|USA	XBB.1.5	EPI_ISL_18072494	2023-07-17	USA
BG|XBB.1.5|EPI_ISL_18072497|2023-07-17|USA	XBB.1.5	EPI_ISL_18072497	2023-07-17	USA
BG|XBB.1.5.72|EPI_ISL_18072510|2023-07-17|USA	XBB.1.5.72	EPI_ISL_18072510	2023-07-17	USA
BG|XBB.1.5|EPI_ISL_18072518|2023-07-17|USA	XBB.1.5	EPI_ISL_18072518	2023-07-17	USA
BG|XBB.1.5.72|EPI_ISL_18072525|2023-07-17|USA	XBB.1.5.72	EPI_ISL_18072525	2023-07-17	USA
BG|XBB.1.5.104|EPI_ISL_18072530|2023-07-17|USA	XBB.1.5.104	EPI_ISL_18072530	2023-07-17	USA
BG|XBB.1.5.72|EPI_ISL_18072539|2023-07-17|USA	XBB.1.5.72	EPI_ISL_18072539	2023-07-17	USA
BG|XBB.1.5|EPI_ISL_18073896|2023-07-17|USA	XBB.1.5	EPI_ISL_18073896	2023-07-17	USA
BG|XBB.1.5.72|EPI_ISL_18073971|2023-07-17|Canada	XBB.1.5.72	EPI_ISL_18073971	2023-07-17	Canada
BG|XBB.1.5.72|EPI_ISL_18073997|2023-07-17|Canada	XBB.1.5.72	EPI_ISL_18073997	2023-07-17	Canada
BG|XBB.1.5|EPI_ISL_18074013|2023-07-17|Canada	XBB.1.5	EPI_ISL_18074013	2023-07-17	Canada
BG|XBB.1.5.72|EPI_ISL_18074027|2023-07-17|Canada	XBB.1.5.72	EPI_ISL_18074027	2023-07-17	Canada
BG|XBB.1.5.72|EPI_ISL_18075764|2023-07-17|Ecuador	XBB.1.5.72	EPI_ISL_18075764	2023-07-17	Ecuador
BG|XBB.1.5|EPI_ISL_18075973|2023-07-17|France	XBB.1.5	EPI_ISL_18075973	2023-07-17	France
BG|XBB.1.5.77|EPI_ISL_18075987|2023-07-17|France	XBB.1.5.77	EPI_ISL_18075987	2023-07-17	France
BG|XBB.1.5.77|EPI_ISL_18075989|2023-07-17|France	XBB.1.5.77	EPI_ISL_18075989	2023-07-17	France
BG|XBB.1.5.72|EPI_ISL_18076919|2023-07-17|Colombia	XBB.1.5.72	EPI_ISL_18076919	2023-07-17	Colombia
BG|XBB.1.5|EPI_ISL_18077363|2023-07-17|USA	XBB.1.5	EPI_ISL_18077363	2023-07-17	USA
BG|XBB.1.5|EPI_ISL_18079075|2023-07-17|Canada	XBB.1.5	EPI_ISL_18079075	2023-07-17	Canada
BG|XBB.1.5|EPI_ISL_18081817|2023-07-17|Japan	XBB.1.5	EPI_ISL_18081817	2023-07-17	Japan
BG|XBB.1.5|EPI_ISL_18082343|2023-07-17|Japan	XBB.1.5	EPI_ISL_18082343	2023-07-17	Japan
BG|XBB.1.5|EPI_ISL_18095478|2023-07-17|USA	XBB.1.5	EPI_ISL_18095478	2023-07-17	USA
BG|XBB.1.5|EPI_ISL_18095729|2023-07-17|USA	XBB.1.5	EPI_ISL_18095729	2023-07-17	USA
BG|XBB.1.5|EPI_ISL_18099387|2023-07-17|Guatemala	XBB.1.5	EPI_ISL_18099387	2023-07-17	Guatemala
BG|XBB.1.5|EPI_ISL_18099392|2023-07-17|Guatemala	XBB.1.5	EPI_ISL_18099392	2023-07-17	Guatemala
BG|XBB.1.5.78|EPI_ISL_18099401|2023-07-17|Guatemala	XBB.1.5.78	EPI_ISL_18099401	2023-07-17	Guatemala
BG|XBB.1.5.72|EPI_ISL_18100053|2023-07-17|Panama	XBB.1.5.72	EPI_ISL_18100053	2023-07-17	Panama
BG|XBB.1.5|EPI_ISL_18107224|2023-07-17|Puerto_Rico	XBB.1.5	EPI_ISL_18107224	2023-07-17	Puerto_Rico
BG|XBB.1.5|EPI_ISL_18109718|2023-07-17|France	XBB.1.5	EPI_ISL_18109718	2023-07-17	France
BG|XBB.1.5|EPI_ISL_18111434|2023-07-17|USA	XBB.1.5	EPI_ISL_18111434	2023-07-17	USA
BG|XBB.1.5|EPI_ISL_18112444|2023-07-17|Spain	XBB.1.5	EPI_ISL_18112444	2023-07-17	Spain
BG|XBB.1.5|EPI_ISL_18114492|2023-07-17|USA	XBB.1.5	EPI_ISL_18114492	2023-07-17	USA
BG|XBB.1.5|EPI_ISL_18116558|2023-07-17|South_Korea	XBB.1.5	EPI_ISL_18116558	2023-07-17	South_Korea
BG|XBB.1.5|EPI_ISL_18116590|2023-07-17|South_Korea	XBB.1.5	EPI_ISL_18116590	2023-07-17	South_Korea
BG|XBB.1.5|EPI_ISL_18116696|2023-07-17|South_Korea	XBB.1.5	EPI_ISL_18116696	2023-07-17	South_Korea
BG|XBB.1.5.73|EPI_ISL_18030581|2023-07-18|Canada	XBB.1.5.73	EPI_ISL_18030581	2023-07-18	Canada
BG|XBB.1.5.77|EPI_ISL_18030589|2023-07-18|Canada	XBB.1.5.77	EPI_ISL_18030589	2023-07-18	Canada
BG|XBB.1.5|EPI_ISL_18038311|2023-07-18|Canada	XBB.1.5	EPI_ISL_18038311	2023-07-18	Canada
BG|XBB.1.5|EPI_ISL_18038316|2023-07-18|Canada	XBB.1.5	EPI_ISL_18038316	2023-07-18	Canada
BG|XBB.1.5|EPI_ISL_18042071|2023-07-18|Thailand	XBB.1.5	EPI_ISL_18042071	2023-07-18	Thailand
BG|XBB.1.5.104|EPI_ISL_18044141|2023-07-18|Spain	XBB.1.5.104	EPI_ISL_18044141	2023-07-18	Spain
BG|XBB.1.5|EPI_ISL_18044182|2023-07-18|Iceland	XBB.1.5	EPI_ISL_18044182	2023-07-18	Iceland
BG|XBB.1.5.96|EPI_ISL_18048616|2023-07-18|Australia	XBB.1.5.96	EPI_ISL_18048616	2023-07-18	Australia
BG|XBB.1.5.75|EPI_ISL_18049227|2023-07-18|USA	XBB.1.5.75	EPI_ISL_18049227	2023-07-18	USA
BG|XBB.1.5|EPI_ISL_18051822|2023-07-18|Japan	XBB.1.5	EPI_ISL_18051822	2023-07-18	Japan
BG|XBB.1.5|EPI_ISL_18051825|2023-07-18|Japan	XBB.1.5	EPI_ISL_18051825	2023-07-18	Japan
BG|XBB.1.5|EPI_ISL_18055192|2023-07-18|Canada	XBB.1.5	EPI_ISL_18055192	2023-07-18	Canada
BG|XBB.1.5.72|EPI_ISL_18057020|2023-07-18|USA	XBB.1.5.72	EPI_ISL_18057020	2023-07-18	USA
BG|XBB.1.5|EPI_ISL_18057045|2023-07-18|USA	XBB.1.5	EPI_ISL_18057045	2023-07-18	USA
BG|XBB.1.5|EPI_ISL_18057065|2023-07-18|USA	XBB.1.5	EPI_ISL_18057065	2023-07-18	USA
BG|XBB.1.5|EPI_ISL_18057070|2023-07-18|USA	XBB.1.5	EPI_ISL_18057070	2023-07-18	USA
BG|XBB.1.5|EPI_ISL_18057913|2023-07-18|USA	XBB.1.5	EPI_ISL_18057913	2023-07-18	USA
BG|XBB.1.5.103|EPI_ISL_18057918|2023-07-18|USA	XBB.1.5.103	EPI_ISL_18057918	2023-07-18	USA
BG|XBB.1.5|EPI_ISL_18058245|2023-07-18|Dominican_Republic	XBB.1.5	EPI_ISL_18058245	2023-07-18	Dominican_Republic
BG|XBB.1.5|EPI_ISL_18059499|2023-07-18|USA	XBB.1.5	EPI_ISL_18059499	2023-07-18	USA
BG|XBB.1.5|EPI_ISL_18059516|2023-07-18|USA	XBB.1.5	EPI_ISL_18059516	2023-07-18	USA
BG|XBB.1.5|EPI_ISL_18059600|2023-07-18|USA	XBB.1.5	EPI_ISL_18059600	2023-07-18	USA
BG|XBB.1.5|EPI_ISL_18059603|2023-07-18|USA	XBB.1.5	EPI_ISL_18059603	2023-07-18	USA
BG|XBB.1.5|EPI_ISL_18059609|2023-07-18|USA	XBB.1.5	EPI_ISL_18059609	2023-07-18	USA
BG|XBB.1.5|EPI_ISL_18060418|2023-07-18|Australia	XBB.1.5	EPI_ISL_18060418	2023-07-18	Australia
BG|XBB.1.5.72|EPI_ISL_18060693|2023-07-18|USA	XBB.1.5.72	EPI_ISL_18060693	2023-07-18	USA
BG|XBB.1.5|EPI_ISL_18064541|2023-07-18|Thailand	XBB.1.5	EPI_ISL_18064541	2023-07-18	Thailand
BG|XBB.1.5|EPI_ISL_18067341|2023-07-18|Taiwan	XBB.1.5	EPI_ISL_18067341	2023-07-18	Taiwan
BG|XBB.1.5.72|EPI_ISL_18069623|2023-07-18|USA	XBB.1.5.72	EPI_ISL_18069623	2023-07-18	USA
BG|XBB.1.5.72|EPI_ISL_18069754|2023-07-18|USA	XBB.1.5.72	EPI_ISL_18069754	2023-07-18	USA
BG|XBB.1.5|EPI_ISL_18069924|2023-07-18|USA	XBB.1.5	EPI_ISL_18069924	2023-07-18	USA
BG|XBB.1.5.73|EPI_ISL_18069970|2023-07-18|USA	XBB.1.5.73	EPI_ISL_18069970	2023-07-18	USA
BG|XBB.1.5|EPI_ISL_18071451|2023-07-18|Costa_Rica	XBB.1.5	EPI_ISL_18071451	2023-07-18	Costa_Rica
BG|XBB.1.5|EPI_ISL_18071474|2023-07-18|Costa_Rica	XBB.1.5	EPI_ISL_18071474	2023-07-18	Costa_Rica
BG|XBB.1.5|EPI_ISL_18071737|2023-07-18|Japan	XBB.1.5	EPI_ISL_18071737	2023-07-18	Japan
BG|XBB.1.5.72|EPI_ISL_18071827|2023-07-18|Colombia	XBB.1.5.72	EPI_ISL_18071827	2023-07-18	Colombia
BG|XBB.1.5|EPI_ISL_18072427|2023-07-18|USA	XBB.1.5	EPI_ISL_18072427	2023-07-18	USA
BG|XBB.1.5|EPI_ISL_18072564|2023-07-18|USA	XBB.1.5	EPI_ISL_18072564	2023-07-18	USA
BG|XBB.1.5|EPI_ISL_18072594|2023-07-18|USA	XBB.1.5	EPI_ISL_18072594	2023-07-18	USA
BG|XBB.1.5|EPI_ISL_18072601|2023-07-18|USA	XBB.1.5	EPI_ISL_18072601	2023-07-18	USA
BG|XBB.1.5|EPI_ISL_18072607|2023-07-18|USA	XBB.1.5	EPI_ISL_18072607	2023-07-18	USA
BG|XBB.1.5|EPI_ISL_18072618|2023-07-18|USA	XBB.1.5	EPI_ISL_18072618	2023-07-18	USA
BG|XBB.1.5.72|EPI_ISL_18072624|2023-07-18|USA	XBB.1.5.72	EPI_ISL_18072624	2023-07-18	USA
BG|XBB.1.5|EPI_ISL_18072639|2023-07-18|USA	XBB.1.5	EPI_ISL_18072639	2023-07-18	USA
BG|XBB.1.5|EPI_ISL_18072643|2023-07-18|USA	XBB.1.5	EPI_ISL_18072643	2023-07-18	USA
BG|XBB.1.5.72|EPI_ISL_18072758|2023-07-18|Spain	XBB.1.5.72	EPI_ISL_18072758	2023-07-18	Spain
BG|XBB.1.5|EPI_ISL_18072842|2023-07-18|USA	XBB.1.5	EPI_ISL_18072842	2023-07-18	USA
BG|XBB.1.5|EPI_ISL_18076019|2023-07-18|France	XBB.1.5	EPI_ISL_18076019	2023-07-18	France
BG|XBB.1.5|EPI_ISL_18076987|2023-07-18|USA	XBB.1.5	EPI_ISL_18076987	2023-07-18	USA
BG|XBB.1.5|EPI_ISL_18076989|2023-07-18|USA	XBB.1.5	EPI_ISL_18076989	2023-07-18	USA
BG|XBB.1.5.72|EPI_ISL_18077419|2023-07-18|USA	XBB.1.5.72	EPI_ISL_18077419	2023-07-18	USA
BG|XBB.1.5.98|EPI_ISL_18078375|2023-07-18|United_Kingdom	XBB.1.5.98	EPI_ISL_18078375	2023-07-18	United_Kingdom
BG|XBB.1.5.86|EPI_ISL_18078908|2023-07-18|Brazil	XBB.1.5.86	EPI_ISL_18078908	2023-07-18	Brazil
BG|XBB.1.5|EPI_ISL_18079029|2023-07-18|Spain	XBB.1.5	EPI_ISL_18079029	2023-07-18	Spain
BG|XBB.1.5|EPI_ISL_18079076|2023-07-18|Canada	XBB.1.5	EPI_ISL_18079076	2023-07-18	Canada
BG|XBB.1.5|EPI_ISL_18081847|2023-07-18|Japan	XBB.1.5	EPI_ISL_18081847	2023-07-18	Japan
BG|XBB.1.5|EPI_ISL_18097381|2023-07-18|Japan	XBB.1.5	EPI_ISL_18097381	2023-07-18	Japan
BG|XBB.1.5|EPI_ISL_18097387|2023-07-18|Japan	XBB.1.5	EPI_ISL_18097387	2023-07-18	Japan
BG|XBB.1.5|EPI_ISL_18098233|2023-07-18|United_Kingdom	XBB.1.5	EPI_ISL_18098233	2023-07-18	United_Kingdom
BG|XBB.1.5|EPI_ISL_18103773|2023-07-18|Mexico	XBB.1.5	EPI_ISL_18103773	2023-07-18	Mexico
BG|XBB.1.5|EPI_ISL_18103774|2023-07-18|Mexico	XBB.1.5	EPI_ISL_18103774	2023-07-18	Mexico
BG|XBB.1.5|EPI_ISL_18106425|2023-07-18|Finland	XBB.1.5	EPI_ISL_18106425	2023-07-18	Finland
BG|XBB.1.5.94|EPI_ISL_18106991|2023-07-18|Canary_Islands	XBB.1.5.94	EPI_ISL_18106991	2023-07-18	Canary_Islands
BG|XBB.1.5|EPI_ISL_18110156|2023-07-18|Costa_Rica	XBB.1.5	EPI_ISL_18110156	2023-07-18	Costa_Rica
BG|XBB.1.5.73|EPI_ISL_18110157|2023-07-18|Costa_Rica	XBB.1.5.73	EPI_ISL_18110157	2023-07-18	Costa_Rica
BG|XBB.1.5|EPI_ISL_18111437|2023-07-18|USA	XBB.1.5	EPI_ISL_18111437	2023-07-18	USA
BG|XBB.1.5.100|EPI_ISL_18113986|2023-07-18|USA	XBB.1.5.100	EPI_ISL_18113986	2023-07-18	USA
BG|XBB.1.5|EPI_ISL_18116758|2023-07-18|South_Korea	XBB.1.5	EPI_ISL_18116758	2023-07-18	South_Korea
BG|XBB.1.5|EPI_ISL_18116789|2023-07-18|South_Korea	XBB.1.5	EPI_ISL_18116789	2023-07-18	South_Korea
BG|XBB.1.5|EPI_ISL_18116821|2023-07-18|South_Korea	XBB.1.5	EPI_ISL_18116821	2023-07-18	South_Korea
BG|XBB.1.5|EPI_ISL_18116885|2023-07-18|South_Korea	XBB.1.5	EPI_ISL_18116885	2023-07-18	South_Korea
BG|XBB.1.5|EPI_ISL_18015523|2023-07-19|Italy	XBB.1.5	EPI_ISL_18015523	2023-07-19	Italy
BG|XBB.1.5.104|EPI_ISL_18044148|2023-07-19|Spain	XBB.1.5.104	EPI_ISL_18044148	2023-07-19	Spain
BG|XBB.1.5|EPI_ISL_18044188|2023-07-19|Iceland	XBB.1.5	EPI_ISL_18044188	2023-07-19	Iceland
BG|XBB.1.5.103|EPI_ISL_18050275|2023-07-19|USA	XBB.1.5.103	EPI_ISL_18050275	2023-07-19	USA
BG|XBB.1.5.72|EPI_ISL_18050837|2023-07-19|Israel	XBB.1.5.72	EPI_ISL_18050837	2023-07-19	Israel
BG|XBB.1.5.77|EPI_ISL_18050854|2023-07-19|Israel	XBB.1.5.77	EPI_ISL_18050854	2023-07-19	Israel
BG|XBB.1.5|EPI_ISL_18050870|2023-07-19|Israel	XBB.1.5	EPI_ISL_18050870	2023-07-19	Israel
BG|XBB.1.5|EPI_ISL_18053048|2023-07-19|USA	XBB.1.5	EPI_ISL_18053048	2023-07-19	USA
BG|XBB.1.5|EPI_ISL_18055189|2023-07-19|Canada	XBB.1.5	EPI_ISL_18055189	2023-07-19	Canada
BG|XBB.1.5.92|EPI_ISL_18055214|2023-07-19|Canada	XBB.1.5.92	EPI_ISL_18055214	2023-07-19	Canada
BG|XBB.1.5.72|EPI_ISL_18055305|2023-07-19|Canada	XBB.1.5.72	EPI_ISL_18055305	2023-07-19	Canada
BG|XBB.1.5.91|EPI_ISL_18056451|2023-07-19|Japan	XBB.1.5.91	EPI_ISL_18056451	2023-07-19	Japan
BG|XBB.1.5|EPI_ISL_18057069|2023-07-19|USA	XBB.1.5	EPI_ISL_18057069	2023-07-19	USA
BG|XBB.1.5.72|EPI_ISL_18057071|2023-07-19|USA	XBB.1.5.72	EPI_ISL_18057071	2023-07-19	USA
BG|XBB.1.5|EPI_ISL_18057316|2023-07-19|USA	XBB.1.5	EPI_ISL_18057316	2023-07-19	USA
BG|XBB.1.5|EPI_ISL_18057328|2023-07-19|USA	XBB.1.5	EPI_ISL_18057328	2023-07-19	USA
BG|XBB.1.5|EPI_ISL_18057337|2023-07-19|USA	XBB.1.5	EPI_ISL_18057337	2023-07-19	USA
BG|XBB.1.5.72|EPI_ISL_18057925|2023-07-19|USA	XBB.1.5.72	EPI_ISL_18057925	2023-07-19	USA
BG|XBB.1.5|EPI_ISL_18059612|2023-07-19|USA	XBB.1.5	EPI_ISL_18059612	2023-07-19	USA
BG|XBB.1.5|EPI_ISL_18059618|2023-07-19|USA	XBB.1.5	EPI_ISL_18059618	2023-07-19	USA
BG|XBB.1.5|EPI_ISL_18059622|2023-07-19|USA	XBB.1.5	EPI_ISL_18059622	2023-07-19	USA
BG|XBB.1.5|EPI_ISL_18059707|2023-07-19|Canada	XBB.1.5	EPI_ISL_18059707	2023-07-19	Canada
BG|XBB.1.5|EPI_ISL_18060711|2023-07-19|USA	XBB.1.5	EPI_ISL_18060711	2023-07-19	USA
BG|XBB.1.5.73|EPI_ISL_18062460|2023-07-19|Canada	XBB.1.5.73	EPI_ISL_18062460	2023-07-19	Canada
BG|XBB.1.5|EPI_ISL_18067353|2023-07-19|Sweden	XBB.1.5	EPI_ISL_18067353	2023-07-19	Sweden
BG|XBB.1.5|EPI_ISL_18067355|2023-07-19|Sweden	XBB.1.5	EPI_ISL_18067355	2023-07-19	Sweden
BG|XBB.1.5.81|EPI_ISL_18069738|2023-07-19|USA	XBB.1.5.81	EPI_ISL_18069738	2023-07-19	USA
BG|XBB.1.5.89|EPI_ISL_18069825|2023-07-19|USA	XBB.1.5.89	EPI_ISL_18069825	2023-07-19	USA
BG|XBB.1.5|EPI_ISL_18070023|2023-07-19|USA	XBB.1.5	EPI_ISL_18070023	2023-07-19	USA
BG|XBB.1.5|EPI_ISL_18071743|2023-07-19|Japan	XBB.1.5	EPI_ISL_18071743	2023-07-19	Japan
BG|XBB.1.5|EPI_ISL_18072194|2023-07-19|Georgia	XBB.1.5	EPI_ISL_18072194	2023-07-19	Georgia
BG|XBB.1.5|EPI_ISL_18072203|2023-07-19|Italy	XBB.1.5	EPI_ISL_18072203	2023-07-19	Italy
BG|XBB.1.5|EPI_ISL_18072656|2023-07-19|USA	XBB.1.5	EPI_ISL_18072656	2023-07-19	USA
BG|XBB.1.5.105|EPI_ISL_18072667|2023-07-19|USA	XBB.1.5.105	EPI_ISL_18072667	2023-07-19	USA
BG|XBB.1.5.77|EPI_ISL_18072670|2023-07-19|USA	XBB.1.5.77	EPI_ISL_18072670	2023-07-19	USA
BG|XBB.1.5.72|EPI_ISL_18072679|2023-07-19|USA	XBB.1.5.72	EPI_ISL_18072679	2023-07-19	USA
BG|XBB.1.5|EPI_ISL_18081477|2023-07-19|USA	XBB.1.5	EPI_ISL_18081477	2023-07-19	USA
BG|XBB.1.5|EPI_ISL_18095732|2023-07-19|USA	XBB.1.5	EPI_ISL_18095732	2023-07-19	USA
BG|XBB.1.5.17|EPI_ISL_18098221|2023-07-19|United_Kingdom	XBB.1.5.17	EPI_ISL_18098221	2023-07-19	United_Kingdom
BG|XBB.1.5.72|EPI_ISL_18098293|2023-07-19|Netherlands	XBB.1.5.72	EPI_ISL_18098293	2023-07-19	Netherlands
BG|XBB.1.5|EPI_ISL_18099386|2023-07-19|Guatemala	XBB.1.5	EPI_ISL_18099386	2023-07-19	Guatemala
BG|XBB.1.5.55|EPI_ISL_18100462|2023-07-19|Japan	XBB.1.5.55	EPI_ISL_18100462	2023-07-19	Japan
BG|XBB.1.5|EPI_ISL_18100672|2023-07-19|Japan	XBB.1.5	EPI_ISL_18100672	2023-07-19	Japan
BG|XBB.1.5|EPI_ISL_18101662|2023-07-19|Argentina	XBB.1.5	EPI_ISL_18101662	2023-07-19	Argentina
BG|XBB.1.5.89|EPI_ISL_18106981|2023-07-19|Canary_Islands	XBB.1.5.89	EPI_ISL_18106981	2023-07-19	Canary_Islands
BG|XBB.1.5.72|EPI_ISL_18107231|2023-07-19|Puerto_Rico	XBB.1.5.72	EPI_ISL_18107231	2023-07-19	Puerto_Rico
BG|XBB.1.5|EPI_ISL_18107300|2023-07-19|Puerto_Rico	XBB.1.5	EPI_ISL_18107300	2023-07-19	Puerto_Rico
BG|XBB.1.5.77|EPI_ISL_18107916|2023-07-19|USA	XBB.1.5.77	EPI_ISL_18107916	2023-07-19	USA
BG|XBB.1.5.104|EPI_ISL_18110104|2023-07-19|USA	XBB.1.5.104	EPI_ISL_18110104	2023-07-19	USA
BG|XBB.1.5|EPI_ISL_18110138|2023-07-19|Costa_Rica	XBB.1.5	EPI_ISL_18110138	2023-07-19	Costa_Rica
BG|XBB.1.5|EPI_ISL_18110141|2023-07-19|Costa_Rica	XBB.1.5	EPI_ISL_18110141	2023-07-19	Costa_Rica
BG|XBB.1.5|EPI_ISL_18110142|2023-07-19|Costa_Rica	XBB.1.5	EPI_ISL_18110142	2023-07-19	Costa_Rica
BG|XBB.1.5|EPI_ISL_18110147|2023-07-19|Costa_Rica	XBB.1.5	EPI_ISL_18110147	2023-07-19	Costa_Rica
BG|XBB.1.5|EPI_ISL_18110173|2023-07-19|USA	XBB.1.5	EPI_ISL_18110173	2023-07-19	USA
BG|XBB.1.5|EPI_ISL_18111816|2023-07-19|Japan	XBB.1.5	EPI_ISL_18111816	2023-07-19	Japan
BG|XBB.1.5.94|EPI_ISL_18113507|2023-07-19|Spain	XBB.1.5.94	EPI_ISL_18113507	2023-07-19	Spain
BG|XBB.1.5.98|EPI_ISL_18113508|2023-07-19|Spain	XBB.1.5.98	EPI_ISL_18113508	2023-07-19	Spain
BG|XBB.1.5|EPI_ISL_18113509|2023-07-19|Spain	XBB.1.5	EPI_ISL_18113509	2023-07-19	Spain
BG|XBB.1.5.106|EPI_ISL_18114031|2023-07-19|USA	XBB.1.5.106	EPI_ISL_18114031	2023-07-19	USA
BG|XBB.1.5.77|EPI_ISL_18114157|2023-07-19|USA	XBB.1.5.77	EPI_ISL_18114157	2023-07-19	USA
BG|XBB.1.5|EPI_ISL_18114285|2023-07-19|USA	XBB.1.5	EPI_ISL_18114285	2023-07-19	USA
BG|XBB.1.5|EPI_ISL_18115442|2023-07-19|USA	XBB.1.5	EPI_ISL_18115442	2023-07-19	USA
BG|XBB.1.5|EPI_ISL_18116898|2023-07-19|South_Korea	XBB.1.5	EPI_ISL_18116898	2023-07-19	South_Korea
BG|XBB.1.5|EPI_ISL_18116949|2023-07-19|South_Korea	XBB.1.5	EPI_ISL_18116949	2023-07-19	South_Korea
BG|XBB.1.5.105|EPI_ISL_18049200|2023-07-20|USA	XBB.1.5.105	EPI_ISL_18049200	2023-07-20	USA
BG|XBB.1.5.103|EPI_ISL_18049313|2023-07-20|USA	XBB.1.5.103	EPI_ISL_18049313	2023-07-20	USA
BG|XBB.1.5.95|EPI_ISL_18050865|2023-07-20|Israel	XBB.1.5.95	EPI_ISL_18050865	2023-07-20	Israel
BG|XBB.1.5|EPI_ISL_18051735|2023-07-20|Japan	XBB.1.5	EPI_ISL_18051735	2023-07-20	Japan
BG|XBB.1.5.72|EPI_ISL_18053087|2023-07-20|Canada	XBB.1.5.72	EPI_ISL_18053087	2023-07-20	Canada
BG|XBB.1.5|EPI_ISL_18054467|2023-07-20|Netherlands	XBB.1.5	EPI_ISL_18054467	2023-07-20	Netherlands
BG|XBB.1.5.72|EPI_ISL_18055225|2023-07-20|Canada	XBB.1.5.72	EPI_ISL_18055225	2023-07-20	Canada
BG|XBB.1.5.72|EPI_ISL_18055227|2023-07-20|Canada	XBB.1.5.72	EPI_ISL_18055227	2023-07-20	Canada
BG|XBB.1.5.72|EPI_ISL_18055288|2023-07-20|Canada	XBB.1.5.72	EPI_ISL_18055288	2023-07-20	Canada
BG|XBB.1.5.72|EPI_ISL_18055293|2023-07-20|Canada	XBB.1.5.72	EPI_ISL_18055293	2023-07-20	Canada
BG|XBB.1.5.72|EPI_ISL_18055333|2023-07-20|Canada	XBB.1.5.72	EPI_ISL_18055333	2023-07-20	Canada
BG|XBB.1.5|EPI_ISL_18055582|2023-07-20|China	XBB.1.5	EPI_ISL_18055582	2023-07-20	China
BG|XBB.1.5.72|EPI_ISL_18057095|2023-07-20|USA	XBB.1.5.72	EPI_ISL_18057095	2023-07-20	USA
BG|XBB.1.5|EPI_ISL_18057182|2023-07-20|USA	XBB.1.5	EPI_ISL_18057182	2023-07-20	USA
BG|XBB.1.5|EPI_ISL_18057294|2023-07-20|USA	XBB.1.5	EPI_ISL_18057294	2023-07-20	USA
BG|XBB.1.5.72|EPI_ISL_18057939|2023-07-20|USA	XBB.1.5.72	EPI_ISL_18057939	2023-07-20	USA
BG|XBB.1.5|EPI_ISL_18059628|2023-07-20|USA	XBB.1.5	EPI_ISL_18059628	2023-07-20	USA
BG|XBB.1.5|EPI_ISL_18059638|2023-07-20|USA	XBB.1.5	EPI_ISL_18059638	2023-07-20	USA
BG|XBB.1.5|EPI_ISL_18059709|2023-07-20|Canada	XBB.1.5	EPI_ISL_18059709	2023-07-20	Canada
BG|XBB.1.5|EPI_ISL_18060791|2023-07-20|China	XBB.1.5	EPI_ISL_18060791	2023-07-20	China
BG|XBB.1.5|EPI_ISL_18062434|2023-07-20|Canada	XBB.1.5	EPI_ISL_18062434	2023-07-20	Canada
BG|XBB.1.5|EPI_ISL_18065373|2023-07-20|USA	XBB.1.5	EPI_ISL_18065373	2023-07-20	USA
BG|XBB.1.5|EPI_ISL_18072025|2023-07-20|United_Kingdom	XBB.1.5	EPI_ISL_18072025	2023-07-20	United_Kingdom
BG|XBB.1.5|EPI_ISL_18072035|2023-07-20|United_Kingdom	XBB.1.5	EPI_ISL_18072035	2023-07-20	United_Kingdom
BG|XBB.1.5|EPI_ISL_18072693|2023-07-20|USA	XBB.1.5	EPI_ISL_18072693	2023-07-20	USA
BG|XBB.1.5.73|EPI_ISL_18075766|2023-07-20|Ecuador	XBB.1.5.73	EPI_ISL_18075766	2023-07-20	Ecuador
BG|XBB.1.5.72|EPI_ISL_18077379|2023-07-20|USA	XBB.1.5.72	EPI_ISL_18077379	2023-07-20	USA
BG|XBB.1.5.72|EPI_ISL_18077385|2023-07-20|USA	XBB.1.5.72	EPI_ISL_18077385	2023-07-20	USA
BG|XBB.1.5|EPI_ISL_18081374|2023-07-20|USA	XBB.1.5	EPI_ISL_18081374	2023-07-20	USA
BG|XBB.1.5|EPI_ISL_18081381|2023-07-20|USA	XBB.1.5	EPI_ISL_18081381	2023-07-20	USA
BG|XBB.1.5|EPI_ISL_18082223|2023-07-20|USA	XBB.1.5	EPI_ISL_18082223	2023-07-20	USA
BG|XBB.1.5|EPI_ISL_18082389|2023-07-20|Japan	XBB.1.5	EPI_ISL_18082389	2023-07-20	Japan
BG|XBB.1.5|EPI_ISL_18082987|2023-07-20|Japan	XBB.1.5	EPI_ISL_18082987	2023-07-20	Japan
BG|XBB.1.5.103|EPI_ISL_18097217|2023-07-20|Argentina	XBB.1.5.103	EPI_ISL_18097217	2023-07-20	Argentina
BG|XBB.1.5|EPI_ISL_18097614|2023-07-20|Japan	XBB.1.5	EPI_ISL_18097614	2023-07-20	Japan
BG|XBB.1.5.72|EPI_ISL_18098292|2023-07-20|Netherlands	XBB.1.5.72	EPI_ISL_18098292	2023-07-20	Netherlands
BG|XBB.1.5.78|EPI_ISL_18099385|2023-07-20|Guatemala	XBB.1.5.78	EPI_ISL_18099385	2023-07-20	Guatemala
BG|XBB.1.5.106|EPI_ISL_18099398|2023-07-20|Guatemala	XBB.1.5.106	EPI_ISL_18099398	2023-07-20	Guatemala
BG|XBB.1.5|EPI_ISL_18099832|2023-07-20|Canada	XBB.1.5	EPI_ISL_18099832	2023-07-20	Canada
BG|XBB.1.5|EPI_ISL_18100460|2023-07-20|Japan	XBB.1.5	EPI_ISL_18100460	2023-07-20	Japan
BG|XBB.1.5.55|EPI_ISL_18100467|2023-07-20|Japan	XBB.1.5.55	EPI_ISL_18100467	2023-07-20	Japan
BG|XBB.1.5.90|EPI_ISL_18101027|2023-07-20|Japan	XBB.1.5.90	EPI_ISL_18101027	2023-07-20	Japan
BG|XBB.1.5|EPI_ISL_18105695|2023-07-20|China	XBB.1.5	EPI_ISL_18105695	2023-07-20	China
BG|XBB.1.5|EPI_ISL_18106993|2023-07-20|Canary_Islands	XBB.1.5	EPI_ISL_18106993	2023-07-20	Canary_Islands
BG|XBB.1.5|EPI_ISL_18106996|2023-07-20|Canary_Islands	XBB.1.5	EPI_ISL_18106996	2023-07-20	Canary_Islands
BG|XBB.1.5|EPI_ISL_18107697|2023-07-20|USA	XBB.1.5	EPI_ISL_18107697	2023-07-20	USA
BG|XBB.1.5|EPI_ISL_18110044|2023-07-20|USA	XBB.1.5	EPI_ISL_18110044	2023-07-20	USA
BG|XBB.1.5.76|EPI_ISL_18110134|2023-07-20|Costa_Rica	XBB.1.5.76	EPI_ISL_18110134	2023-07-20	Costa_Rica
BG|XBB.1.5.103|EPI_ISL_18110172|2023-07-20|USA	XBB.1.5.103	EPI_ISL_18110172	2023-07-20	USA
BG|XBB.1.5.104|EPI_ISL_18113382|2023-07-20|USA	XBB.1.5.104	EPI_ISL_18113382	2023-07-20	USA
BG|XBB.1.5|EPI_ISL_18113920|2023-07-20|USA	XBB.1.5	EPI_ISL_18113920	2023-07-20	USA
BG|XBB.1.5.86|EPI_ISL_18114121|2023-07-20|USA	XBB.1.5.86	EPI_ISL_18114121	2023-07-20	USA
BG|XBB.1.5|EPI_ISL_18114153|2023-07-20|USA	XBB.1.5	EPI_ISL_18114153	2023-07-20	USA
BG|XBB.1.5.72|EPI_ISL_18114245|2023-07-20|USA	XBB.1.5.72	EPI_ISL_18114245	2023-07-20	USA
BG|XBB.1.5.94|EPI_ISL_18114307|2023-07-20|USA	XBB.1.5.94	EPI_ISL_18114307	2023-07-20	USA
BG|XBB.1.5|EPI_ISL_18118195|2023-07-20|Spain	XBB.1.5	EPI_ISL_18118195	2023-07-20	Spain
BG|XBB.1.5|EPI_ISL_18037725|2023-07-21|USA	XBB.1.5	EPI_ISL_18037725	2023-07-21	USA
BG|XBB.1.5.94|EPI_ISL_18044764|2023-07-21|France	XBB.1.5.94	EPI_ISL_18044764	2023-07-21	France
BG|XBB.1.5|EPI_ISL_18049899|2023-07-21|USA	XBB.1.5	EPI_ISL_18049899	2023-07-21	USA
BG|XBB.1.5|EPI_ISL_18049917|2023-07-21|USA	XBB.1.5	EPI_ISL_18049917	2023-07-21	USA
BG|XBB.1.5|EPI_ISL_18051741|2023-07-21|Japan	XBB.1.5	EPI_ISL_18051741	2023-07-21	Japan
BG|XBB.1.5|EPI_ISL_18051742|2023-07-21|Japan	XBB.1.5	EPI_ISL_18051742	2023-07-21	Japan
BG|XBB.1.5.44|EPI_ISL_18053102|2023-07-21|Canada	XBB.1.5.44	EPI_ISL_18053102	2023-07-21	Canada
BG|XBB.1.5.106|EPI_ISL_18055283|2023-07-21|Canada	XBB.1.5.106	EPI_ISL_18055283	2023-07-21	Canada
BG|XBB.1.5|EPI_ISL_18055297|2023-07-21|Canada	XBB.1.5	EPI_ISL_18055297	2023-07-21	Canada
BG|XBB.1.5.72|EPI_ISL_18055314|2023-07-21|Canada	XBB.1.5.72	EPI_ISL_18055314	2023-07-21	Canada
BG|XBB.1.5.72|EPI_ISL_18057186|2023-07-21|USA	XBB.1.5.72	EPI_ISL_18057186	2023-07-21	USA
BG|XBB.1.5|EPI_ISL_18057222|2023-07-21|USA	XBB.1.5	EPI_ISL_18057222	2023-07-21	USA
BG|XBB.1.5|EPI_ISL_18057282|2023-07-21|USA	XBB.1.5	EPI_ISL_18057282	2023-07-21	USA
BG|XBB.1.5|EPI_ISL_18057327|2023-07-21|USA	XBB.1.5	EPI_ISL_18057327	2023-07-21	USA
BG|XBB.1.5|EPI_ISL_18057955|2023-07-21|USA	XBB.1.5	EPI_ISL_18057955	2023-07-21	USA
BG|XBB.1.5|EPI_ISL_18057966|2023-07-21|USA	XBB.1.5	EPI_ISL_18057966	2023-07-21	USA
BG|XBB.1.5|EPI_ISL_18058170|2023-07-21|USA	XBB.1.5	EPI_ISL_18058170	2023-07-21	USA
BG|XBB.1.5.73|EPI_ISL_18059514|2023-07-21|USA	XBB.1.5.73	EPI_ISL_18059514	2023-07-21	USA
BG|XBB.1.5|EPI_ISL_18059711|2023-07-21|Canada	XBB.1.5	EPI_ISL_18059711	2023-07-21	Canada
BG|XBB.1.5|EPI_ISL_18063025|2023-07-21|South_Korea	XBB.1.5	EPI_ISL_18063025	2023-07-21	South_Korea
BG|XBB.1.5|EPI_ISL_18064532|2023-07-21|Thailand	XBB.1.5	EPI_ISL_18064532	2023-07-21	Thailand
BG|XBB.1.5|EPI_ISL_18066795|2023-07-21|United_Kingdom	XBB.1.5	EPI_ISL_18066795	2023-07-21	United_Kingdom
BG|XBB.1.5|EPI_ISL_18071677|2023-07-21|Japan	XBB.1.5	EPI_ISL_18071677	2023-07-21	Japan
BG|XBB.1.5|EPI_ISL_18072069|2023-07-21|United_Kingdom	XBB.1.5	EPI_ISL_18072069	2023-07-21	United_Kingdom
BG|XBB.1.5|EPI_ISL_18072720|2023-07-21|USA	XBB.1.5	EPI_ISL_18072720	2023-07-21	USA
BG|XBB.1.5.72|EPI_ISL_18072738|2023-07-21|USA	XBB.1.5.72	EPI_ISL_18072738	2023-07-21	USA
BG|XBB.1.5.73|EPI_ISL_18075767|2023-07-21|Ecuador	XBB.1.5.73	EPI_ISL_18075767	2023-07-21	Ecuador
BG|XBB.1.5.78|EPI_ISL_18075768|2023-07-21|Ecuador	XBB.1.5.78	EPI_ISL_18075768	2023-07-21	Ecuador
BG|XBB.1.5|EPI_ISL_18077395|2023-07-21|USA	XBB.1.5	EPI_ISL_18077395	2023-07-21	USA
BG|XBB.1.5|EPI_ISL_18081434|2023-07-21|USA	XBB.1.5	EPI_ISL_18081434	2023-07-21	USA
BG|XBB.1.5|EPI_ISL_18082393|2023-07-21|Japan	XBB.1.5	EPI_ISL_18082393	2023-07-21	Japan
BG|XBB.1.5.104|EPI_ISL_18090075|2023-07-21|USA	XBB.1.5.104	EPI_ISL_18090075	2023-07-21	USA
BG|XBB.1.5.72|EPI_ISL_18095724|2023-07-21|USA	XBB.1.5.72	EPI_ISL_18095724	2023-07-21	USA
BG|XBB.1.5|EPI_ISL_18095820|2023-07-21|USA	XBB.1.5	EPI_ISL_18095820	2023-07-21	USA
BG|XBB.1.5|EPI_ISL_18095832|2023-07-21|USA	XBB.1.5	EPI_ISL_18095832	2023-07-21	USA
BG|XBB.1.5|EPI_ISL_18095848|2023-07-21|USA	XBB.1.5	EPI_ISL_18095848	2023-07-21	USA
BG|XBB.1.5|EPI_ISL_18097472|2023-07-21|Japan	XBB.1.5	EPI_ISL_18097472	2023-07-21	Japan
BG|XBB.1.5|EPI_ISL_18098542|2023-07-21|Spain	XBB.1.5	EPI_ISL_18098542	2023-07-21	Spain
BG|XBB.1.5.77|EPI_ISL_18099393|2023-07-21|Guatemala	XBB.1.5.77	EPI_ISL_18099393	2023-07-21	Guatemala
BG|XBB.1.5|EPI_ISL_18099395|2023-07-21|Guatemala	XBB.1.5	EPI_ISL_18099395	2023-07-21	Guatemala
BG|XBB.1.5|EPI_ISL_18099419|2023-07-21|Guatemala	XBB.1.5	EPI_ISL_18099419	2023-07-21	Guatemala
BG|XBB.1.5.90|EPI_ISL_18101036|2023-07-21|Japan	XBB.1.5.90	EPI_ISL_18101036	2023-07-21	Japan
BG|XBB.1.5|EPI_ISL_18106318|2023-07-21|Japan	XBB.1.5	EPI_ISL_18106318	2023-07-21	Japan
BG|XBB.1.33|EPI_ISL_18106786|2023-07-21|Italy	XBB.1.33	EPI_ISL_18106786	2023-07-21	Italy
BG|XBB.1.5|EPI_ISL_18107607|2023-07-21|USA	XBB.1.5	EPI_ISL_18107607	2023-07-21	USA
BG|XBB.1.5|EPI_ISL_18107700|2023-07-21|USA	XBB.1.5	EPI_ISL_18107700	2023-07-21	USA
BG|XBB.1.5.100|EPI_ISL_18107701|2023-07-21|USA	XBB.1.5.100	EPI_ISL_18107701	2023-07-21	USA
BG|XBB.1.5.103|EPI_ISL_18107704|2023-07-21|USA	XBB.1.5.103	EPI_ISL_18107704	2023-07-21	USA
BG|XBB.1.5|EPI_ISL_18107705|2023-07-21|USA	XBB.1.5	EPI_ISL_18107705	2023-07-21	USA
BG|XBB.1.5.103|EPI_ISL_18107867|2023-07-21|USA	XBB.1.5.103	EPI_ISL_18107867	2023-07-21	USA
BG|XBB.1.5|EPI_ISL_18108158|2023-07-21|USA	XBB.1.5	EPI_ISL_18108158	2023-07-21	USA
BG|XBB.1.44.1|EPI_ISL_18108871|2023-07-21|China	XBB.1.44.1	EPI_ISL_18108871	2023-07-21	China
BG|XBB.1.5.72|EPI_ISL_18111293|2023-07-21|USA	XBB.1.5.72	EPI_ISL_18111293	2023-07-21	USA
BG|XBB.1.5|EPI_ISL_18111674|2023-07-21|South_Korea	XBB.1.5	EPI_ISL_18111674	2023-07-21	South_Korea
BG|XBB.1.5.104|EPI_ISL_18113386|2023-07-21|USA	XBB.1.5.104	EPI_ISL_18113386	2023-07-21	USA
BG|XBB.1.5.105|EPI_ISL_18113969|2023-07-21|USA	XBB.1.5.105	EPI_ISL_18113969	2023-07-21	USA
BG|XBB.1.5|EPI_ISL_18114166|2023-07-21|USA	XBB.1.5	EPI_ISL_18114166	2023-07-21	USA
BG|XBB.1.5|EPI_ISL_18115196|2023-07-21|USA	XBB.1.5	EPI_ISL_18115196	2023-07-21	USA
BG|XBB.1.5.72|EPI_ISL_18118286|2023-07-21|Spain	XBB.1.5.72	EPI_ISL_18118286	2023-07-21	Spain
BG|XBB.1.5|EPI_ISL_18053104|2023-07-22|Canada	XBB.1.5	EPI_ISL_18053104	2023-07-22	Canada
BG|XBB.1.5|EPI_ISL_18053105|2023-07-22|Canada	XBB.1.5	EPI_ISL_18053105	2023-07-22	Canada
BG|XBB.1.5.72|EPI_ISL_18055331|2023-07-22|Canada	XBB.1.5.72	EPI_ISL_18055331	2023-07-22	Canada
BG|XBB.1.5|EPI_ISL_18060432|2023-07-22|Australia	XBB.1.5	EPI_ISL_18060432	2023-07-22	Australia
BG|XBB.1.5.104|EPI_ISL_18063195|2023-07-22|Spain	XBB.1.5.104	EPI_ISL_18063195	2023-07-22	Spain
BG|XBB.1.5|EPI_ISL_18072742|2023-07-22|USA	XBB.1.5	EPI_ISL_18072742	2023-07-22	USA
BG|XBB.1.5|EPI_ISL_18072745|2023-07-22|USA	XBB.1.5	EPI_ISL_18072745	2023-07-22	USA
BG|XBB.1.5.106|EPI_ISL_18072850|2023-07-22|USA	XBB.1.5.106	EPI_ISL_18072850	2023-07-22	USA
BG|XBB.1.5.72|EPI_ISL_18073898|2023-07-22|USA	XBB.1.5.72	EPI_ISL_18073898	2023-07-22	USA
BG|XBB.1.5.72|EPI_ISL_18074375|2023-07-22|China	XBB.1.5.72	EPI_ISL_18074375	2023-07-22	China
BG|XBB.1.5|EPI_ISL_18074382|2023-07-22|China	XBB.1.5	EPI_ISL_18074382	2023-07-22	China
BG|XBB.1.5.81|EPI_ISL_18080088|2023-07-22|USA	XBB.1.5.81	EPI_ISL_18080088	2023-07-22	USA
BG|XBB.1.5|EPI_ISL_18081550|2023-07-22|USA	XBB.1.5	EPI_ISL_18081550	2023-07-22	USA
BG|XBB.1.5.77|EPI_ISL_18095681|2023-07-22|USA	XBB.1.5.77	EPI_ISL_18095681	2023-07-22	USA
BG|XBB.1.5|EPI_ISL_18095877|2023-07-22|USA	XBB.1.5	EPI_ISL_18095877	2023-07-22	USA
BG|XBB.1.5.90|EPI_ISL_18097643|2023-07-22|Japan	XBB.1.5.90	EPI_ISL_18097643	2023-07-22	Japan
BG|XBB.1.5.55|EPI_ISL_18100494|2023-07-22|Japan	XBB.1.5.55	EPI_ISL_18100494	2023-07-22	Japan
BG|XBB.1.5.92|EPI_ISL_18103756|2023-07-22|USA	XBB.1.5.92	EPI_ISL_18103756	2023-07-22	USA
BG|XBB.1.5.72|EPI_ISL_18106364|2023-07-22|USA	XBB.1.5.72	EPI_ISL_18106364	2023-07-22	USA
BG|XBB.1.5.72|EPI_ISL_18107752|2023-07-22|USA	XBB.1.5.72	EPI_ISL_18107752	2023-07-22	USA
BG|XBB.1.5.77|EPI_ISL_18114160|2023-07-22|USA	XBB.1.5.77	EPI_ISL_18114160	2023-07-22	USA
BG|XBB.1.5|EPI_ISL_18053103|2023-07-23|Canada	XBB.1.5	EPI_ISL_18053103	2023-07-23	Canada
BG|XBB.1.5.72|EPI_ISL_18055292|2023-07-23|Canada	XBB.1.5.72	EPI_ISL_18055292	2023-07-23	Canada
BG|XBB.1.5.72|EPI_ISL_18055294|2023-07-23|Canada	XBB.1.5.72	EPI_ISL_18055294	2023-07-23	Canada
BG|XBB.1.5|EPI_ISL_18055345|2023-07-23|Canada	XBB.1.5	EPI_ISL_18055345	2023-07-23	Canada
BG|BA.2.75.6|EPI_ISL_18056643|2023-07-23|Singapore	BA.2.75.6	EPI_ISL_18056643	2023-07-23	Singapore
BG|XBB.1.5.72|EPI_ISL_18056968|2023-07-23|USA	XBB.1.5.72	EPI_ISL_18056968	2023-07-23	USA
BG|XBB.1.5|EPI_ISL_18057193|2023-07-23|USA	XBB.1.5	EPI_ISL_18057193	2023-07-23	USA
BG|XBB.1.5|EPI_ISL_18057194|2023-07-23|USA	XBB.1.5	EPI_ISL_18057194	2023-07-23	USA
BG|XBB.1.5|EPI_ISL_18057218|2023-07-23|USA	XBB.1.5	EPI_ISL_18057218	2023-07-23	USA
BG|XBB.1.5|EPI_ISL_18057243|2023-07-23|USA	XBB.1.5	EPI_ISL_18057243	2023-07-23	USA
BG|XBB.1.5.72|EPI_ISL_18057322|2023-07-23|USA	XBB.1.5.72	EPI_ISL_18057322	2023-07-23	USA
BG|XBB.1.5.72|EPI_ISL_18063215|2023-07-23|Spain	XBB.1.5.72	EPI_ISL_18063215	2023-07-23	Spain
BG|XBB.1.5.89|EPI_ISL_18073973|2023-07-23|Canada	XBB.1.5.89	EPI_ISL_18073973	2023-07-23	Canada
BG|XBB.1.5.72|EPI_ISL_18074004|2023-07-23|Canada	XBB.1.5.72	EPI_ISL_18074004	2023-07-23	Canada
BG|XBB.1.5.89|EPI_ISL_18074026|2023-07-23|Canada	XBB.1.5.89	EPI_ISL_18074026	2023-07-23	Canada
BG|XBB.1.5.72|EPI_ISL_18080101|2023-07-23|USA	XBB.1.5.72	EPI_ISL_18080101	2023-07-23	USA
BG|XBB.1.5|EPI_ISL_18080103|2023-07-23|USA	XBB.1.5	EPI_ISL_18080103	2023-07-23	USA
BG|XBB.1.5|EPI_ISL_18081522|2023-07-23|USA	XBB.1.5	EPI_ISL_18081522	2023-07-23	USA
BG|XBB.1.5|EPI_ISL_18090111|2023-07-23|USA	XBB.1.5	EPI_ISL_18090111	2023-07-23	USA
BG|XBB.1.5.72|EPI_ISL_18090308|2023-07-23|USA	XBB.1.5.72	EPI_ISL_18090308	2023-07-23	USA
BG|XBB.1.5|EPI_ISL_18094222|2023-07-23|United_Kingdom	XBB.1.5	EPI_ISL_18094222	2023-07-23	United_Kingdom
BG|XBB.1.5.72|EPI_ISL_18095902|2023-07-23|USA	XBB.1.5.72	EPI_ISL_18095902	2023-07-23	USA
BG|XBB.1.5.106|EPI_ISL_18099389|2023-07-23|Guatemala	XBB.1.5.106	EPI_ISL_18099389	2023-07-23	Guatemala
BG|XBB.1.5.106|EPI_ISL_18099397|2023-07-23|Guatemala	XBB.1.5.106	EPI_ISL_18099397	2023-07-23	Guatemala
BG|XBB.1.5|EPI_ISL_18107725|2023-07-23|USA	XBB.1.5	EPI_ISL_18107725	2023-07-23	USA
BG|XBB.1.5|EPI_ISL_18107856|2023-07-23|USA	XBB.1.5	EPI_ISL_18107856	2023-07-23	USA
BG|XBB.1.5.78|EPI_ISL_18110811|2023-07-23|USA	XBB.1.5.78	EPI_ISL_18110811	2023-07-23	USA
BG|XBB.1.5|EPI_ISL_18113698|2023-07-23|Canada	XBB.1.5	EPI_ISL_18113698	2023-07-23	Canada
BG|XBB.1.5|EPI_ISL_18113922|2023-07-23|USA	XBB.1.5	EPI_ISL_18113922	2023-07-23	USA
BG|XBB.1.5|EPI_ISL_18117177|2023-07-23|South_Korea	XBB.1.5	EPI_ISL_18117177	2023-07-23	South_Korea
BG|XBB.1.5|EPI_ISL_18117191|2023-07-23|South_Korea	XBB.1.5	EPI_ISL_18117191	2023-07-23	South_Korea
BG|XBB.1.5|EPI_ISL_18117211|2023-07-23|South_Korea	XBB.1.5	EPI_ISL_18117211	2023-07-23	South_Korea
BG|XBB.1.5|EPI_ISL_18117281|2023-07-23|South_Korea	XBB.1.5	EPI_ISL_18117281	2023-07-23	South_Korea
BG|XBB.1.5|EPI_ISL_18117306|2023-07-23|South_Korea	XBB.1.5	EPI_ISL_18117306	2023-07-23	South_Korea
BG|XBB.1.5.73|EPI_ISL_18038249|2023-07-24|Peru	XBB.1.5.73	EPI_ISL_18038249	2023-07-24	Peru
BG|XBB.1.5|EPI_ISL_18044206|2023-07-24|Iceland	XBB.1.5	EPI_ISL_18044206	2023-07-24	Iceland
BG|XBB.1.5|EPI_ISL_18053109|2023-07-24|Canada	XBB.1.5	EPI_ISL_18053109	2023-07-24	Canada
BG|XBB.1.5|EPI_ISL_18053110|2023-07-24|Canada	XBB.1.5	EPI_ISL_18053110	2023-07-24	Canada
BG|XBB.1.5|EPI_ISL_18053111|2023-07-24|Canada	XBB.1.5	EPI_ISL_18053111	2023-07-24	Canada
BG|XBB.1.5|EPI_ISL_18053112|2023-07-24|Canada	XBB.1.5	EPI_ISL_18053112	2023-07-24	Canada
BG|XBB.1.5|EPI_ISL_18053113|2023-07-24|Canada	XBB.1.5	EPI_ISL_18053113	2023-07-24	Canada
BG|XBB.1.5|EPI_ISL_18055392|2023-07-24|Canada	XBB.1.5	EPI_ISL_18055392	2023-07-24	Canada
BG|BA.2.75.6|EPI_ISL_18056644|2023-07-24|Singapore	BA.2.75.6	EPI_ISL_18056644	2023-07-24	Singapore
BG|XBB.1.5.72|EPI_ISL_18057986|2023-07-24|USA	XBB.1.5.72	EPI_ISL_18057986	2023-07-24	USA
BG|XBB.1.5|EPI_ISL_18065251|2023-07-24|Japan	XBB.1.5	EPI_ISL_18065251	2023-07-24	Japan
BG|XBB.1.5.105|EPI_ISL_18071875|2023-07-24|Denmark	XBB.1.5.105	EPI_ISL_18071875	2023-07-24	Denmark
BG|XBB.1.5|EPI_ISL_18071885|2023-07-24|Denmark	XBB.1.5	EPI_ISL_18071885	2023-07-24	Denmark
BG|XBB.1.5|EPI_ISL_18072042|2023-07-24|United_Kingdom	XBB.1.5	EPI_ISL_18072042	2023-07-24	United_Kingdom
BG|XBB.1.5|EPI_ISL_18072350|2023-07-24|USA	XBB.1.5	EPI_ISL_18072350	2023-07-24	USA
BG|XBB.1.5.77|EPI_ISL_18072853|2023-07-24|USA	XBB.1.5.77	EPI_ISL_18072853	2023-07-24	USA
BG|XBB.1.5|EPI_ISL_18073907|2023-07-24|USA	XBB.1.5	EPI_ISL_18073907	2023-07-24	USA
BG|XBB.1.5|EPI_ISL_18073942|2023-07-24|Canada	XBB.1.5	EPI_ISL_18073942	2023-07-24	Canada
BG|XBB.1.5.86|EPI_ISL_18074017|2023-07-24|Canada	XBB.1.5.86	EPI_ISL_18074017	2023-07-24	Canada
BG|XBB.1.5|EPI_ISL_18074021|2023-07-24|Canada	XBB.1.5	EPI_ISL_18074021	2023-07-24	Canada
BG|XBB.1.5|EPI_ISL_18074077|2023-07-24|Canada	XBB.1.5	EPI_ISL_18074077	2023-07-24	Canada
BG|XBB.1.5|EPI_ISL_18076392|2023-07-24|Canada	XBB.1.5	EPI_ISL_18076392	2023-07-24	Canada
BG|XBB.1.5|EPI_ISL_18077422|2023-07-24|USA	XBB.1.5	EPI_ISL_18077422	2023-07-24	USA
BG|XBB.1.5.106|EPI_ISL_18078977|2023-07-24|USA	XBB.1.5.106	EPI_ISL_18078977	2023-07-24	USA
BG|XBB.1.5|EPI_ISL_18080110|2023-07-24|USA	XBB.1.5	EPI_ISL_18080110	2023-07-24	USA
BG|XBB.1.5.72|EPI_ISL_18080136|2023-07-24|USA	XBB.1.5.72	EPI_ISL_18080136	2023-07-24	USA
BG|XBB.1.5|EPI_ISL_18081396|2023-07-24|USA	XBB.1.5	EPI_ISL_18081396	2023-07-24	USA
BG|XBB.1.5|EPI_ISL_18081468|2023-07-24|USA	XBB.1.5	EPI_ISL_18081468	2023-07-24	USA
BG|XBB.1.5|EPI_ISL_18081518|2023-07-24|USA	XBB.1.5	EPI_ISL_18081518	2023-07-24	USA
BG|XBB.1.5|EPI_ISL_18081551|2023-07-24|USA	XBB.1.5	EPI_ISL_18081551	2023-07-24	USA
BG|XBB.1.5|EPI_ISL_18088305|2023-07-24|United_Kingdom	XBB.1.5	EPI_ISL_18088305	2023-07-24	United_Kingdom
BG|XBB.1.5.72|EPI_ISL_18090134|2023-07-24|USA	XBB.1.5.72	EPI_ISL_18090134	2023-07-24	USA
BG|XBB.1.5|EPI_ISL_18094030|2023-07-24|Germany	XBB.1.5	EPI_ISL_18094030	2023-07-24	Germany
BG|XBB.1.5.89|EPI_ISL_18094649|2023-07-24|France	XBB.1.5.89	EPI_ISL_18094649	2023-07-24	France
BG|XBB.1.5|EPI_ISL_18095904|2023-07-24|USA	XBB.1.5	EPI_ISL_18095904	2023-07-24	USA
BG|XBB.1.5.72|EPI_ISL_18095906|2023-07-24|USA	XBB.1.5.72	EPI_ISL_18095906	2023-07-24	USA
BG|XBB.1.5.75|EPI_ISL_18095924|2023-07-24|USA	XBB.1.5.75	EPI_ISL_18095924	2023-07-24	USA
BG|XBB.1.5|EPI_ISL_18095938|2023-07-24|Spain	XBB.1.5	EPI_ISL_18095938	2023-07-24	Spain
BG|XBB.1.5|EPI_ISL_18097123|2023-07-24|Japan	XBB.1.5	EPI_ISL_18097123	2023-07-24	Japan
BG|XBB.1.5|EPI_ISL_18097349|2023-07-24|Denmark	XBB.1.5	EPI_ISL_18097349	2023-07-24	Denmark
BG|XBB.1.5|EPI_ISL_18097495|2023-07-24|Japan	XBB.1.5	EPI_ISL_18097495	2023-07-24	Japan
BG|XBB.1.5|EPI_ISL_18098941|2023-07-24|USA	XBB.1.5	EPI_ISL_18098941	2023-07-24	USA
BG|XBB.1.5.80|EPI_ISL_18098988|2023-07-24|USA	XBB.1.5.80	EPI_ISL_18098988	2023-07-24	USA
BG|XBB.1.5|EPI_ISL_18099014|2023-07-24|USA	XBB.1.5	EPI_ISL_18099014	2023-07-24	USA
BG|XBB.1.5.72|EPI_ISL_18099025|2023-07-24|USA	XBB.1.5.72	EPI_ISL_18099025	2023-07-24	USA
BG|XBB.1.5.72|EPI_ISL_18099060|2023-07-24|USA	XBB.1.5.72	EPI_ISL_18099060	2023-07-24	USA
BG|XBB.1.5|EPI_ISL_18099067|2023-07-24|USA	XBB.1.5	EPI_ISL_18099067	2023-07-24	USA
BG|XBB.1.5.72|EPI_ISL_18099229|2023-07-24|USA	XBB.1.5.72	EPI_ISL_18099229	2023-07-24	USA
BG|XBB.1.16.11|EPI_ISL_18099230|2023-07-24|USA	XBB.1.16.11	EPI_ISL_18099230	2023-07-24	USA
BG|XBB.1.5.106|EPI_ISL_18099390|2023-07-24|Guatemala	XBB.1.5.106	EPI_ISL_18099390	2023-07-24	Guatemala
BG|XBB.1.5.72|EPI_ISL_18104134|2023-07-24|USA	XBB.1.5.72	EPI_ISL_18104134	2023-07-24	USA
BG|XBB.1.5.72|EPI_ISL_18107257|2023-07-24|Puerto_Rico	XBB.1.5.72	EPI_ISL_18107257	2023-07-24	Puerto_Rico
BG|XBB.1.5.72|EPI_ISL_18107717|2023-07-24|USA	XBB.1.5.72	EPI_ISL_18107717	2023-07-24	USA
BG|XBB.1.5|EPI_ISL_18108162|2023-07-24|USA	XBB.1.5	EPI_ISL_18108162	2023-07-24	USA
BG|XBB.1.5.73|EPI_ISL_18109739|2023-07-24|France	XBB.1.5.73	EPI_ISL_18109739	2023-07-24	France
BG|XBB.1.5.105|EPI_ISL_18109825|2023-07-24|France	XBB.1.5.105	EPI_ISL_18109825	2023-07-24	France
BG|XBB.1.5.105|EPI_ISL_18109827|2023-07-24|France	XBB.1.5.105	EPI_ISL_18109827	2023-07-24	France
BG|XBB.1.5.72|EPI_ISL_18110126|2023-07-24|Spain	XBB.1.5.72	EPI_ISL_18110126	2023-07-24	Spain
BG|XBB.1.5.72|EPI_ISL_18110159|2023-07-24|Costa_Rica	XBB.1.5.72	EPI_ISL_18110159	2023-07-24	Costa_Rica
BG|XBB.1.5.77|EPI_ISL_18111375|2023-07-24|USA	XBB.1.5.77	EPI_ISL_18111375	2023-07-24	USA
BG|XBB.1.5|EPI_ISL_18112095|2023-07-24|Germany	XBB.1.5	EPI_ISL_18112095	2023-07-24	Germany
BG|XBB.1.5|EPI_ISL_18113392|2023-07-24|USA	XBB.1.5	EPI_ISL_18113392	2023-07-24	USA
BG|XBB.1.5|EPI_ISL_18113393|2023-07-24|USA	XBB.1.5	EPI_ISL_18113393	2023-07-24	USA
BG|XBB.1.5.72|EPI_ISL_18113803|2023-07-24|USA	XBB.1.5.72	EPI_ISL_18113803	2023-07-24	USA
BG|XBB.1.5|EPI_ISL_18113842|2023-07-24|USA	XBB.1.5	EPI_ISL_18113842	2023-07-24	USA
BG|XBB.1.5.106|EPI_ISL_18113977|2023-07-24|USA	XBB.1.5.106	EPI_ISL_18113977	2023-07-24	USA
BG|XBB.1.5.72|EPI_ISL_18114066|2023-07-24|USA	XBB.1.5.72	EPI_ISL_18114066	2023-07-24	USA
BG|XBB.1.5|EPI_ISL_18114243|2023-07-24|USA	XBB.1.5	EPI_ISL_18114243	2023-07-24	USA
BG|XBB.1.5|EPI_ISL_18114374|2023-07-24|USA	XBB.1.5	EPI_ISL_18114374	2023-07-24	USA
BG|XBB.1.5|EPI_ISL_18117323|2023-07-24|South_Korea	XBB.1.5	EPI_ISL_18117323	2023-07-24	South_Korea
BG|XBB.1.5|EPI_ISL_18117488|2023-07-24|South_Korea	XBB.1.5	EPI_ISL_18117488	2023-07-24	South_Korea
BG|XBB.1.5.73|EPI_ISL_18117500|2023-07-24|South_Korea	XBB.1.5.73	EPI_ISL_18117500	2023-07-24	South_Korea
BG|XBB.1.5.91|EPI_ISL_18051750|2023-07-25|Japan	XBB.1.5.91	EPI_ISL_18051750	2023-07-25	Japan
BG|XBB.1.5.72|EPI_ISL_18055348|2023-07-25|Canada	XBB.1.5.72	EPI_ISL_18055348	2023-07-25	Canada
BG|XBB.1.5.72|EPI_ISL_18055349|2023-07-25|Canada	XBB.1.5.72	EPI_ISL_18055349	2023-07-25	Canada
BG|XBB.1.5|EPI_ISL_18055359|2023-07-25|Canada	XBB.1.5	EPI_ISL_18055359	2023-07-25	Canada
BG|XBB.1.5|EPI_ISL_18056535|2023-07-25|Singapore	XBB.1.5	EPI_ISL_18056535	2023-07-25	Singapore
BG|XBB.1.5|EPI_ISL_18062641|2023-07-25|Israel	XBB.1.5	EPI_ISL_18062641	2023-07-25	Israel
BG|XBB.1.33|EPI_ISL_18063192|2023-07-25|Italy	XBB.1.33	EPI_ISL_18063192	2023-07-25	Italy
BG|XBB.1.5|EPI_ISL_18065784|2023-07-25|USA	XBB.1.5	EPI_ISL_18065784	2023-07-25	USA
BG|XBB.1.5|EPI_ISL_18065799|2023-07-25|USA	XBB.1.5	EPI_ISL_18065799	2023-07-25	USA
BG|XBB.1.5.77|EPI_ISL_18076697|2023-07-25|Ecuador	XBB.1.5.77	EPI_ISL_18076697	2023-07-25	Ecuador
BG|XBB.1.5|EPI_ISL_18077203|2023-07-25|Dominican_Republic	XBB.1.5	EPI_ISL_18077203	2023-07-25	Dominican_Republic
BG|XBB.1.5|EPI_ISL_18078847|2023-07-25|USA	XBB.1.5	EPI_ISL_18078847	2023-07-25	USA
BG|XBB.1.5|EPI_ISL_18080153|2023-07-25|USA	XBB.1.5	EPI_ISL_18080153	2023-07-25	USA
BG|XBB.1.5.86|EPI_ISL_18080174|2023-07-25|USA	XBB.1.5.86	EPI_ISL_18080174	2023-07-25	USA
BG|XBB.1.5|EPI_ISL_18080179|2023-07-25|USA	XBB.1.5	EPI_ISL_18080179	2023-07-25	USA
BG|XBB.1.5.72|EPI_ISL_18080182|2023-07-25|USA	XBB.1.5.72	EPI_ISL_18080182	2023-07-25	USA
BG|XBB.1.5|EPI_ISL_18082791|2023-07-25|Japan	XBB.1.5	EPI_ISL_18082791	2023-07-25	Japan
BG|XBB.1.5|EPI_ISL_18094124|2023-07-25|Iceland	XBB.1.5	EPI_ISL_18094124	2023-07-25	Iceland
BG|XBB.1.5.105|EPI_ISL_18094213|2023-07-25|United_Kingdom	XBB.1.5.105	EPI_ISL_18094213	2023-07-25	United_Kingdom
BG|XBB.1.5.72|EPI_ISL_18095424|2023-07-25|USA	XBB.1.5.72	EPI_ISL_18095424	2023-07-25	USA
BG|XBB.1.5|EPI_ISL_18095741|2023-07-25|USA	XBB.1.5	EPI_ISL_18095741	2023-07-25	USA
BG|XBB.1.5|EPI_ISL_18097128|2023-07-25|Japan	XBB.1.5	EPI_ISL_18097128	2023-07-25	Japan
BG|XBB.1.5|EPI_ISL_18097135|2023-07-25|Japan	XBB.1.5	EPI_ISL_18097135	2023-07-25	Japan
BG|XBB.1.5.72|EPI_ISL_18098906|2023-07-25|USA	XBB.1.5.72	EPI_ISL_18098906	2023-07-25	USA
BG|XBB.1.5.72|EPI_ISL_18098920|2023-07-25|USA	XBB.1.5.72	EPI_ISL_18098920	2023-07-25	USA
BG|XBB.1.5|EPI_ISL_18099023|2023-07-25|USA	XBB.1.5	EPI_ISL_18099023	2023-07-25	USA
BG|XBB.1.5.37|EPI_ISL_18099105|2023-07-25|USA	XBB.1.5.37	EPI_ISL_18099105	2023-07-25	USA
BG|XBB.1.5|EPI_ISL_18099855|2023-07-25|Canada	XBB.1.5	EPI_ISL_18099855	2023-07-25	Canada
BG|XBB.1.5.100|EPI_ISL_18104163|2023-07-25|USA	XBB.1.5.100	EPI_ISL_18104163	2023-07-25	USA
BG|XBB.1.5|EPI_ISL_18104184|2023-07-25|USA	XBB.1.5	EPI_ISL_18104184	2023-07-25	USA
BG|XBB.1.5|EPI_ISL_18104187|2023-07-25|USA	XBB.1.5	EPI_ISL_18104187	2023-07-25	USA
BG|XBB.1.5.72|EPI_ISL_18104213|2023-07-25|USA	XBB.1.5.72	EPI_ISL_18104213	2023-07-25	USA
BG|XBB.1.5|EPI_ISL_18104219|2023-07-25|USA	XBB.1.5	EPI_ISL_18104219	2023-07-25	USA
BG|XBB.1.5.92|EPI_ISL_18104230|2023-07-25|USA	XBB.1.5.92	EPI_ISL_18104230	2023-07-25	USA
BG|XBB.1.5|EPI_ISL_18104237|2023-07-25|USA	XBB.1.5	EPI_ISL_18104237	2023-07-25	USA
BG|XBB.1.5|EPI_ISL_18104242|2023-07-25|USA	XBB.1.5	EPI_ISL_18104242	2023-07-25	USA
BG|XBB.1.5|EPI_ISL_18104246|2023-07-25|USA	XBB.1.5	EPI_ISL_18104246	2023-07-25	USA
BG|XBB.1.5.72|EPI_ISL_18104255|2023-07-25|USA	XBB.1.5.72	EPI_ISL_18104255	2023-07-25	USA
BG|XBB.1.5.72|EPI_ISL_18104256|2023-07-25|USA	XBB.1.5.72	EPI_ISL_18104256	2023-07-25	USA
BG|XBB.1.5.72|EPI_ISL_18107600|2023-07-25|USA	XBB.1.5.72	EPI_ISL_18107600	2023-07-25	USA
BG|XBB.1.5|EPI_ISL_18107721|2023-07-25|USA	XBB.1.5	EPI_ISL_18107721	2023-07-25	USA
BG|XBB.1.5.103|EPI_ISL_18107738|2023-07-25|USA	XBB.1.5.103	EPI_ISL_18107738	2023-07-25	USA
BG|XBB.1.5.72|EPI_ISL_18110155|2023-07-25|Costa_Rica	XBB.1.5.72	EPI_ISL_18110155	2023-07-25	Costa_Rica
BG|XBB.1.5|EPI_ISL_18110158|2023-07-25|Costa_Rica	XBB.1.5	EPI_ISL_18110158	2023-07-25	Costa_Rica
BG|XBB.1.5.72|EPI_ISL_18110161|2023-07-25|Costa_Rica	XBB.1.5.72	EPI_ISL_18110161	2023-07-25	Costa_Rica
BG|XBB.1.5|EPI_ISL_18111304|2023-07-25|USA	XBB.1.5	EPI_ISL_18111304	2023-07-25	USA
BG|XBB.1.5|EPI_ISL_18112096|2023-07-25|Germany	XBB.1.5	EPI_ISL_18112096	2023-07-25	Germany
BG|XBB.1.5|EPI_ISL_18113692|2023-07-25|Canada	XBB.1.5	EPI_ISL_18113692	2023-07-25	Canada
BG|XBB.1.5|EPI_ISL_18113704|2023-07-25|Canada	XBB.1.5	EPI_ISL_18113704	2023-07-25	Canada
BG|XBB.1.5|EPI_ISL_18113826|2023-07-25|USA	XBB.1.5	EPI_ISL_18113826	2023-07-25	USA
BG|XBB.1.5|EPI_ISL_18113831|2023-07-25|USA	XBB.1.5	EPI_ISL_18113831	2023-07-25	USA
BG|XBB.1.5.72|EPI_ISL_18113870|2023-07-25|USA	XBB.1.5.72	EPI_ISL_18113870	2023-07-25	USA
BG|XBB.1.5|EPI_ISL_18113879|2023-07-25|USA	XBB.1.5	EPI_ISL_18113879	2023-07-25	USA
BG|XBB.1.5|EPI_ISL_18113902|2023-07-25|USA	XBB.1.5	EPI_ISL_18113902	2023-07-25	USA
BG|XBB.1.5|EPI_ISL_18113911|2023-07-25|USA	XBB.1.5	EPI_ISL_18113911	2023-07-25	USA
BG|XBB.1.5|EPI_ISL_18113946|2023-07-25|USA	XBB.1.5	EPI_ISL_18113946	2023-07-25	USA
BG|XBB.1.5.76|EPI_ISL_18113980|2023-07-25|USA	XBB.1.5.76	EPI_ISL_18113980	2023-07-25	USA
BG|XBB.1.5.72|EPI_ISL_18114185|2023-07-25|USA	XBB.1.5.72	EPI_ISL_18114185	2023-07-25	USA
BG|XBB.1.5|EPI_ISL_18114192|2023-07-25|USA	XBB.1.5	EPI_ISL_18114192	2023-07-25	USA
BG|XBB.1.5|EPI_ISL_18114370|2023-07-25|USA	XBB.1.5	EPI_ISL_18114370	2023-07-25	USA
BG|XBB.1.5|EPI_ISL_18115245|2023-07-25|USA	XBB.1.5	EPI_ISL_18115245	2023-07-25	USA
BG|XBB.1.5|EPI_ISL_18115249|2023-07-25|USA	XBB.1.5	EPI_ISL_18115249	2023-07-25	USA
BG|XBB.1.5|EPI_ISL_18115451|2023-07-25|USA	XBB.1.5	EPI_ISL_18115451	2023-07-25	USA
BG|XBB.1.5|EPI_ISL_18117601|2023-07-25|South_Korea	XBB.1.5	EPI_ISL_18117601	2023-07-25	South_Korea
BG|XBB.1.5|EPI_ISL_18117632|2023-07-25|South_Korea	XBB.1.5	EPI_ISL_18117632	2023-07-25	South_Korea
BG|XBB.1.5|EPI_ISL_18053115|2023-07-26|Canada	XBB.1.5	EPI_ISL_18053115	2023-07-26	Canada
BG|XBB.1.5|EPI_ISL_18062642|2023-07-26|Israel	XBB.1.5	EPI_ISL_18062642	2023-07-26	Israel
BG|XBB.1.5.72|EPI_ISL_18062681|2023-07-26|Israel	XBB.1.5.72	EPI_ISL_18062681	2023-07-26	Israel
BG|XBB.1.5|EPI_ISL_18063203|2023-07-26|Spain	XBB.1.5	EPI_ISL_18063203	2023-07-26	Spain
BG|XBB.1.5.72|EPI_ISL_18067197|2023-07-26|USA	XBB.1.5.72	EPI_ISL_18067197	2023-07-26	USA
BG|XBB.1.5.72|EPI_ISL_18071917|2023-07-26|Italy	XBB.1.5.72	EPI_ISL_18071917	2023-07-26	Italy
BG|XBB.1.5.72|EPI_ISL_18076176|2023-07-26|Ireland	XBB.1.5.72	EPI_ISL_18076176	2023-07-26	Ireland
BG|XBB.1.5.72|EPI_ISL_18076178|2023-07-26|Ireland	XBB.1.5.72	EPI_ISL_18076178	2023-07-26	Ireland
BG|XBB.1.5.72|EPI_ISL_18076179|2023-07-26|Ireland	XBB.1.5.72	EPI_ISL_18076179	2023-07-26	Ireland
BG|XBB.1.5|EPI_ISL_18076444|2023-07-26|Canada	XBB.1.5	EPI_ISL_18076444	2023-07-26	Canada
BG|XBB.1.5|EPI_ISL_18076446|2023-07-26|Canada	XBB.1.5	EPI_ISL_18076446	2023-07-26	Canada
BG|XBB.1.5|EPI_ISL_18076448|2023-07-26|Canada	XBB.1.5	EPI_ISL_18076448	2023-07-26	Canada
BG|XBB.1.5.72|EPI_ISL_18078850|2023-07-26|USA	XBB.1.5.72	EPI_ISL_18078850	2023-07-26	USA
BG|XBB.1.5.92|EPI_ISL_18080198|2023-07-26|USA	XBB.1.5.92	EPI_ISL_18080198	2023-07-26	USA
BG|XBB.1.5.72|EPI_ISL_18080201|2023-07-26|USA	XBB.1.5.72	EPI_ISL_18080201	2023-07-26	USA
BG|XBB.1.5|EPI_ISL_18080206|2023-07-26|USA	XBB.1.5	EPI_ISL_18080206	2023-07-26	USA
BG|XBB.1.5|EPI_ISL_18080208|2023-07-26|USA	XBB.1.5	EPI_ISL_18080208	2023-07-26	USA
BG|XBB.1.5.72|EPI_ISL_18080213|2023-07-26|USA	XBB.1.5.72	EPI_ISL_18080213	2023-07-26	USA
BG|XBB.1.5|EPI_ISL_18080225|2023-07-26|USA	XBB.1.5	EPI_ISL_18080225	2023-07-26	USA
BG|XBB.1.5.73|EPI_ISL_18090055|2023-07-26|USA	XBB.1.5.73	EPI_ISL_18090055	2023-07-26	USA
BG|XBB.1.5|EPI_ISL_18090164|2023-07-26|USA	XBB.1.5	EPI_ISL_18090164	2023-07-26	USA
BG|XBB.1.5|EPI_ISL_18090174|2023-07-26|USA	XBB.1.5	EPI_ISL_18090174	2023-07-26	USA
BG|XBB.1.5.105|EPI_ISL_18094224|2023-07-26|United_Kingdom	XBB.1.5.105	EPI_ISL_18094224	2023-07-26	United_Kingdom
BG|XBB.1.5.94|EPI_ISL_18095946|2023-07-26|Spain	XBB.1.5.94	EPI_ISL_18095946	2023-07-26	Spain
BG|XBB.1.5.89|EPI_ISL_18098391|2023-07-26|USA	XBB.1.5.89	EPI_ISL_18098391	2023-07-26	USA
BG|XBB.1.5|EPI_ISL_18098532|2023-07-26|Spain	XBB.1.5	EPI_ISL_18098532	2023-07-26	Spain
BG|XBB.1.5|EPI_ISL_18098937|2023-07-26|USA	XBB.1.5	EPI_ISL_18098937	2023-07-26	USA
BG|XBB.1.5|EPI_ISL_18098960|2023-07-26|USA	XBB.1.5	EPI_ISL_18098960	2023-07-26	USA
BG|XBB.1.5|EPI_ISL_18098997|2023-07-26|USA	XBB.1.5	EPI_ISL_18098997	2023-07-26	USA
BG|XBB.1.5|EPI_ISL_18099006|2023-07-26|USA	XBB.1.5	EPI_ISL_18099006	2023-07-26	USA
BG|XBB.1.5|EPI_ISL_18099238|2023-07-26|USA	XBB.1.5	EPI_ISL_18099238	2023-07-26	USA
BG|XBB.1.5|EPI_ISL_18104269|2023-07-26|USA	XBB.1.5	EPI_ISL_18104269	2023-07-26	USA
BG|XBB.1.5|EPI_ISL_18104275|2023-07-26|USA	XBB.1.5	EPI_ISL_18104275	2023-07-26	USA
BG|XBB.1.5|EPI_ISL_18104290|2023-07-26|USA	XBB.1.5	EPI_ISL_18104290	2023-07-26	USA
BG|XBB.1.5|EPI_ISL_18104305|2023-07-26|USA	XBB.1.5	EPI_ISL_18104305	2023-07-26	USA
BG|XBB.1.5.75|EPI_ISL_18104310|2023-07-26|USA	XBB.1.5.75	EPI_ISL_18104310	2023-07-26	USA
BG|XBB.1.5.72|EPI_ISL_18104322|2023-07-26|USA	XBB.1.5.72	EPI_ISL_18104322	2023-07-26	USA
BG|XBB.1.5.72|EPI_ISL_18104326|2023-07-26|USA	XBB.1.5.72	EPI_ISL_18104326	2023-07-26	USA
BG|XBB.1.5.106|EPI_ISL_18104341|2023-07-26|USA	XBB.1.5.106	EPI_ISL_18104341	2023-07-26	USA
BG|XBB.1.5.72|EPI_ISL_18104351|2023-07-26|USA	XBB.1.5.72	EPI_ISL_18104351	2023-07-26	USA
BG|XBB.1.5|EPI_ISL_18104359|2023-07-26|USA	XBB.1.5	EPI_ISL_18104359	2023-07-26	USA
BG|XBB.1.5|EPI_ISL_18106164|2023-07-26|Japan	XBB.1.5	EPI_ISL_18106164	2023-07-26	Japan
BG|XBB.1.5.86|EPI_ISL_18107610|2023-07-26|USA	XBB.1.5.86	EPI_ISL_18107610	2023-07-26	USA
BG|XBB.1.5|EPI_ISL_18107768|2023-07-26|USA	XBB.1.5	EPI_ISL_18107768	2023-07-26	USA
BG|XBB.1.5.72|EPI_ISL_18110843|2023-07-26|USA	XBB.1.5.72	EPI_ISL_18110843	2023-07-26	USA
BG|XBB.1.5|EPI_ISL_18112359|2023-07-26|Spain	XBB.1.5	EPI_ISL_18112359	2023-07-26	Spain
BG|XBB.1.5|EPI_ISL_18113715|2023-07-26|Canada	XBB.1.5	EPI_ISL_18113715	2023-07-26	Canada
[truncated: 495 more rows]

## Sheet: Supplementary Table 3
D1
Pango Lineage	Country	EPI_ISL	Date
BA.2	South Korea	EPI_ISL_17294034	2023-03-01
BA.2	Australia	EPI_ISL_17824611	2023-03-01
BA.2	Belgium	EPI_ISL_17286156	2023-03-03
BA.2	South Korea	EPI_ISL_17294517	2023-03-04
BA.2	Belgium	EPI_ISL_17204448	2023-03-04
BA.2.75	Italy	EPI_ISL_17188855	2023-03-05
BA.2	Chile	EPI_ISL_17861626	2023-03-06
BA.2.75	Poland	EPI_ISL_17266708	2023-03-06
BA.2.75	Poland	EPI_ISL_17266711	2023-03-06
BA.2	USA	EPI_ISL_17305030	2023-03-07
BA.2.75	Portugal	EPI_ISL_17242733	2023-03-07
BA.2	Mauritius	EPI_ISL_17395630	2023-03-08
BA.2	Ukraine	EPI_ISL_17535884	2023-03-09
BA.2.75	Guangdong	EPI_ISL_17494488	2023-03-10
BA.2.75	Spain	EPI_ISL_17275884	2023-03-10
BA.2.75	Italy	EPI_ISL_17257582	2023-03-11
BA.2	India	EPI_ISL_17372222	2023-03-12
BA.2	Nepal	EPI_ISL_17591967	2023-03-12
BA.2	Venezuela	EPI_ISL_18059726	2023-03-16
BA.2.75	South Korea	EPI_ISL_17415098	2023-03-17
BA.2.75	Italy	EPI_ISL_17285430	2023-03-18
BA.2	France	EPI_ISL_17524503	2023-03-20
BA.2	France	EPI_ISL_17471619	2023-03-20
BA.2.75	Guangdong	EPI_ISL_17494081	2023-03-20
BA.2	Spain	EPI_ISL_17482576	2023-03-21
BA.2	Ireland	EPI_ISL_17399290	2023-03-22
BA.2	Ireland	EPI_ISL_17399266	2023-03-22
BA.2	Nepal	EPI_ISL_17591984	2023-03-22
BA.2	South	EPI_ISL_17474243	2023-03-22
BA.2	Ireland	EPI_ISL_17415432	2023-03-24
BA.2.75	Germany	EPI_ISL_17433832	2023-03-24
BA.2	Australia	EPI_ISL_17409209	2023-03-28
BA.2.75	South Korea	EPI_ISL_17538417	2023-03-28
BA.2	South	EPI_ISL_17511420	2023-03-29
BA.2	India	EPI_ISL_17446132	2023-03-29
BA.2	India	EPI_ISL_17540695	2023-03-31
BA.2	Malaysia	EPI_ISL_17655018	2023-03-31
BA.2	Spain	EPI_ISL_17521622	2023-03-31
BA.2.75	India	EPI_ISL_17591366	2023-04-03
BA.2.75	Ukraine	EPI_ISL_17558881	2023-04-03
BA.2.75	Portugal	EPI_ISL_17592538	2023-04-05
BA.2.75	Italy	EPI_ISL_17526263	2023-04-08
BA.2	Russia	EPI_ISL_17736261	2023-04-10
BA.2	Russia	EPI_ISL_17736259	2023-04-10
BA.2	Russia	EPI_ISL_17736264	2023-04-10
BA.2	Malaysia	EPI_ISL_17722379	2023-04-10
BA.2	Malaysia	EPI_ISL_17509034	2023-04-14
BA.2	France	EPI_ISL_17626289	2023-04-14
BA.2	Spain	EPI_ISL_17679253	2023-04-17
BA.2	Germany	EPI_ISL_17613009	2023-04-19
BA.2	USA	EPI_ISL_17758726	2023-04-20
BA.2	USA	EPI_ISL_17758727	2023-04-20
BA.2	Japan	EPI_ISL_17552993	2023-04-20
BA.2	USA	EPI_ISL_17758740	2023-04-20
BA.2	India	EPI_ISL_17717659	2023-04-20
BA.2	USA	EPI_ISL_17758738	2023-04-20
BA.2	USA	EPI_ISL_17758724	2023-04-20
BA.2	USA	EPI_ISL_17589845	2023-04-20
BA.2	Shanghai	EPI_ISL_17618306	2023-04-22
BA.2	USA	EPI_ISL_17686073	2023-04-24
BA.2	New Zealand	EPI_ISL_17738950	2023-05-09
BA.2	Malaysia	EPI_ISL_17695747	2023-05-09
BA.2	Australia	EPI_ISL_17703815	2023-05-13
BA.2	Canada	EPI_ISL_17799068	2023-05-31
BA.2	Norway	EPI_ISL_17837092	2023-06-08
BA.2	Norway	EPI_ISL_17837097	2023-06-09
BA.2	Thailand	EPI_ISL_17851276	2023-06-11
BA.2	Iceland	EPI_ISL_18044164	2023-06-14
BA.2	Thailand	EPI_ISL_18064519	2023-06-16
BA.2	Spain	EPI_ISL_17949299	2023-06-16
BA.2	Australia	EPI_ISL_17857950	2023-06-19
BA.2	Australia	EPI_ISL_17857949	2023-06-22
BA.2	Australia	EPI_ISL_18000155	2023-06-22
BA.2	Austria	EPI_ISL_17962930	2023-06-27
XBB.1.5	USA	EPI_ISL_18057680	2023-07-07
XBB.1.5	Argentina	EPI_ISL_18095192	2023-07-07
XBB.1.5	Argentina	EPI_ISL_18095193	2023-07-07
XBB.1.5	Spain	EPI_ISL_18008616	2023-07-13
XBB.1.5	USA	EPI_ISL_18114489	2023-07-16
XBB.1.5	Spain	EPI_ISL_18044141	2023-07-18
XBB.1.5	Spain	EPI_ISL_18044148	2023-07-19
XBB.1.5	USA	EPI_ISL_18057955	2023-07-21
XBB.1.5	Spain	EPI_ISL_18063195	2023-07-22
BA.2.75	Singapore	EPI_ISL_18056643	2023-07-23
BA.2.75	Singapore	EPI_ISL_18056644	2023-07-24
BA.2.86	Denmark	EPI_ISL_18097345	2023-07-24
BA.2.86	South Africa	EPI_ISL_18125259	2023-07-24
BA.2	Netherlands	EPI_ISL_18098299	2023-07-26
BA.2.86	South Africa	EPI_ISL_18125249	2023-07-28
XBB.1.5	USA	EPI_ISL_18104740	2023-07-28
XBB.1.5	Spain	EPI_ISL_18099347	2023-07-28
BA.2.86	Denmark	EPI_ISL_18097315	2023-07-31
BA.2.86	Israel	EPI_ISL_18096761	2023-07-31
XBB.1.5	Spain	EPI_ISL_18109928	2023-08-01
BA.2.86	USA	EPI_ISL_18110065	2023-08-03
XBB.1.5	Spain	EPI_ISL_18078430	2023-08-03
BA.2.86	Denmark	EPI_ISL_18114953	2023-08-07
XBB.1.5	Spain	EPI_ISL_18106732	2023-08-09
BA.2	Qatar	EPI_ISL_18116015	2023-08-10
BA.2.86	England	EPI_ISL_18111770	2023-08-13

## Sheet: Supplementary Table 4
D2
FG/BG	Pango Lineage	Country	EPI_ISL	Date
FG	JN.2	USA	EPI_ISL_18637313	2022-10-22
FG	JN.1	Ireland	EPI_ISL_18718535	2023-01-02
FG	JN.1	Austria	EPI_ISL_18536326	2023-01-13
BG	BA.2	Australia	EPI_ISL_17824611	2023-03-01
BG	BA.2	South Korea	EPI_ISL_17294034	2023-03-01
BG	BA.2	Japan	EPI_ISL_17104941	2023-03-01
BG	BA.2	India	EPI_ISL_17372412	2023-03-01
BG	CH.1.1	Peru	EPI_ISL_17639894	2023-03-02
BG	BA.2	Germany	EPI_ISL_17256091	2023-03-03
BG	BA.2	Belgium	EPI_ISL_17286156	2023-03-03
BG	BA.2	Germany	EPI_ISL_17256261	2023-03-03
BG	BA.2.75	Germany	EPI_ISL_17256239	2023-03-03
BG	CH.1.1	Germany	EPI_ISL_17256241	2023-03-03
BG	XBB.1.5	Italy	EPI_ISL_17187033	2023-03-03
BG	BA.2	South Korea	EPI_ISL_17294517	2023-03-04
BG	BA.2	Belgium	EPI_ISL_17204448	2023-03-04
BG	BA.2.75	Italy	EPI_ISL_17188855	2023-03-05
BG	BA.2	Chile	EPI_ISL_17861626	2023-03-06
BG	BA.2	India	EPI_ISL_17372416	2023-03-06
BG	BA.2.75	Germany	EPI_ISL_17256247	2023-03-06
BG	BA.2.75	Germany	EPI_ISL_17256256	2023-03-06
BG	BA.2.75	Poland	EPI_ISL_17266711	2023-03-06
BG	BA.2.75	Poland	EPI_ISL_17266708	2023-03-06
BG	CH.1.1	Germany	EPI_ISL_17256244	2023-03-06
BG	BA.2	USA	EPI_ISL_17305030	2023-03-07
BG	BA.2.75	Portugal	EPI_ISL_17242733	2023-03-07
BG	BA.2	Italy	EPI_ISL_17201694	2023-03-08
BG	BA.2	Mauritius	EPI_ISL_17395630	2023-03-08
BG	BA.2	Spain	EPI_ISL_17275956	2023-03-08
BG	BA.2	Ukraine	EPI_ISL_17535884	2023-03-09
BG	BA.2	India	EPI_ISL_17372414	2023-03-09
BG	BA.2.75	China	EPI_ISL_17494488	2023-03-10
BG	BA.4	Spain	EPI_ISL_17275884	2023-03-10
BG	BA.2.75	Italy	EPI_ISL_17257582	2023-03-11
FG	BA.2.86	South Africa	EPI_ISL_18607082	2023-03-11
BG	BA.2	Nepal	EPI_ISL_17591967	2023-03-12
BG	BA.2	India	EPI_ISL_17372222	2023-03-12
BG	BA.2	Germany	EPI_ISL_17406348	2023-03-15
BG	BA.2	Spain	EPI_ISL_17614136	2023-03-16
BG	BA.2	Venezuela	EPI_ISL_18059726	2023-03-16
BG	BA.2.75	South Korea	EPI_ISL_17415098	2023-03-17
BG	BA.2.75	Italy	EPI_ISL_17285430	2023-03-18
BG	BA.2.75	Italy	EPI_ISL_17285434	2023-03-18
BG	BA.2.75	Italy	EPI_ISL_17285431	2023-03-18
BG	BA.2	Belgium	EPI_ISL_17582830	2023-03-19
BG	BA.2	France	EPI_ISL_17524503	2023-03-20
BG	BA.2	France	EPI_ISL_17471619	2023-03-20
BG	BA.2.75	China	EPI_ISL_17494081	2023-03-20
BG	BA.2.75	Belgium	EPI_ISL_17276506	2023-03-20
BG	BA.2	Ireland	EPI_ISL_17383533	2023-03-21
BG	BA.2	Spain	EPI_ISL_17482576	2023-03-21
BG	BA.2	Spain	EPI_ISL_17482608	2023-03-21
BG	BA.2.75	Germany	EPI_ISL_17518818	2023-03-21
BG	BA.2	Nepal	EPI_ISL_17591984	2023-03-22
BG	BA.2	Ireland	EPI_ISL_17399290	2023-03-22
BG	BA.2	Ireland	EPI_ISL_17399266	2023-03-22
BG	BA.2	South Korea	EPI_ISL_17474243	2023-03-22
BG	BA.2	Ireland	EPI_ISL_17415432	2023-03-24
BG	BA.2.75	Germany	EPI_ISL_17433832	2023-03-24
BG	BA.2.75	India	EPI_ISL_17554880	2023-03-25
BG	BA.2.75.3	Spain	EPI_ISL_17614169	2023-03-25
BG	BA.2	Italy	EPI_ISL_17792172	2023-03-28
BG	BA.2	Australia	EPI_ISL_17409209	2023-03-28
BG	BA.2.75	South Korea	EPI_ISL_17538417	2023-03-28
BG	BA.2	South Korea	EPI_ISL_17511420	2023-03-29
BG	BA.2	South Korea	EPI_ISL_17538685	2023-03-29
BG	BA.2.1	India	EPI_ISL_17446132	2023-03-29
BG	BA.2.75	South Korea	EPI_ISL_17538658	2023-03-29
BG	BA.2	Spain	EPI_ISL_17521622	2023-03-31
BG	BA.2	Malaysia	EPI_ISL_17655018	2023-03-31
BG	BA.2	India	EPI_ISL_17540695	2023-03-31
BG	BA.2.75	USA	EPI_ISL_17428340	2023-03-31
BG	BA.2	Germany	EPI_ISL_17468953	2023-04-03
BG	BA.2	Spain	EPI_ISL_17652513	2023-04-03
BG	BA.2	Austria	EPI_ISL_17472110	2023-04-03
BG	BA.2.75	India	EPI_ISL_17591366	2023-04-03
BG	BA.2.75	Ukraine	EPI_ISL_17558881	2023-04-03
BG	BA.2	Italy	EPI_ISL_17434223	2023-04-04
BG	BA.2.75	Portugal	EPI_ISL_17592538	2023-04-05
BG	BA.2	Italy	EPI_ISL_17608288	2023-04-06
BG	BA.5.2	Germany	EPI_ISL_17613011	2023-04-06
BG	BA.2	Malaysia	EPI_ISL_17509296	2023-04-08
BG	BA.2.75	Italy	EPI_ISL_17526263	2023-04-08
BG	BA.2	Malaysia	EPI_ISL_17722379	2023-04-10
BG	BA.2	Russia	EPI_ISL_17736264	2023-04-10
BG	BA.2	Russia	EPI_ISL_17736259	2023-04-10
BG	BA.2	Russia	EPI_ISL_17736261	2023-04-10
BG	BA.2	Russia	EPI_ISL_17736263	2023-04-10
BG	BA.2	Spain	EPI_ISL_17503828	2023-04-11
BG	BA.2	Ukraine	EPI_ISL_17583263	2023-04-11
FG	JN.1	France	EPI_ISL_18717172	2023-04-12
FG	JN.1.1	France	EPI_ISL_18717183	2023-04-12
BG	BA.2	Malaysia	EPI_ISL_17509034	2023-04-14
BG	BA.2	France	EPI_ISL_17626289	2023-04-14
BG	BA.2	Spain	EPI_ISL_17679253	2023-04-17
BG	BA.2	Germany	EPI_ISL_17613009	2023-04-19
BG	BA.2	USA	EPI_ISL_17612114	2023-04-19
BG	BA.2	Japan	EPI_ISL_17552993	2023-04-20
BG	BA.2	USA	EPI_ISL_17758714	2023-04-20
BG	BA.2	USA	EPI_ISL_17758726	2023-04-20
BG	BA.2	USA	EPI_ISL_17758718	2023-04-20
BG	BA.2	USA	EPI_ISL_17758727	2023-04-20
BG	BA.2	USA	EPI_ISL_17758708	2023-04-20
BG	BA.2	USA	EPI_ISL_17758720	2023-04-20
BG	BA.2	USA	EPI_ISL_17758716	2023-04-20
BG	BA.2	USA	EPI_ISL_17758724	2023-04-20
BG	BA.2	USA	EPI_ISL_17758738	2023-04-20
BG	BA.2	USA	EPI_ISL_17758740	2023-04-20
BG	BA.2	USA	EPI_ISL_17589845	2023-04-20
BG	BA.2	India	EPI_ISL_17717659	2023-04-20
BG	BA.2	China	EPI_ISL_17618306	2023-04-22
BG	BA.2	USA	EPI_ISL_17686073	2023-04-24
BG	BA.2.1	Spain	EPI_ISL_17630096	2023-04-25
BG	BA.2	China	EPI_ISL_17836425	2023-04-27
BG	BA.2.75	South Korea	EPI_ISL_17691534	2023-04-30
BG	BA.2	China	EPI_ISL_17775563	2023-05-04
BG	BA.2	South Korea	EPI_ISL_17724069	2023-05-07
BG	BA.2	New Zealand	EPI_ISL_17738950	2023-05-09
BG	BA.2	Malaysia	EPI_ISL_17695747	2023-05-09
BG	BA.2	Indonesia	EPI_ISL_17797250	2023-05-10
BG	BA.2	Italy	EPI_ISL_17833706	2023-05-10
BG	BA.2	Australia	EPI_ISL_17703815	2023-05-13
BG	BA.2	China	EPI_ISL_18035170	2023-05-22
BG	BA.2	Sweden	EPI_ISL_17809237	2023-05-22
BG	BA.2.1	Spain	EPI_ISL_17797704	2023-05-26
BG	BA.2	Canada	EPI_ISL_17799068	2023-05-31
BG	BA.2	Thailand	EPI_ISL_17816174	2023-06-01
BG	DV.7.1	Spain	EPI_ISL_17812744	2023-06-03
BG	BA.2	Austria	EPI_ISL_17826754	2023-06-05
BG	BA.2	Spain	EPI_ISL_17812750	2023-06-06
BG	BA.2	Spain	EPI_ISL_17812758	2023-06-07
BG	BA.2	Norway	EPI_ISL_17837092	2023-06-08
BG	BA.2	Norway	EPI_ISL_17837097	2023-06-09
BG	BA.2	Thailand	EPI_ISL_17851276	2023-06-11
BG	BA.2	Austria	EPI_ISL_17881004	2023-06-13
BG	BA.2.5	Iceland	EPI_ISL_18044164	2023-06-14
BG	BA.2	Spain	EPI_ISL_17949299	2023-06-16
BG	BA.2	Thailand	EPI_ISL_18064519	2023-06-16
BG	BA.2	Australia	EPI_ISL_17857950	2023-06-19
BG	BA.2	Spain	EPI_ISL_18094795	2023-06-20
BG	BA.2	Australia	EPI_ISL_17857949	2023-06-22
BG	BA.2	Australia	EPI_ISL_18000155	2023-06-22
BG	BA.2	Austria	EPI_ISL_17962930	2023-06-27
BG	XBB.1.33	Netherlands	EPI_ISL_18032333	2023-07-01
BG	XBB.1.5	USA	EPI_ISL_17985480	2023-07-01
BG	XBB.1.5	Australia	EPI_ISL_18032437	2023-07-01
BG	XBB.1.5	Canada	EPI_ISL_18045161	2023-07-01
BG	XBB.1.5	Canary Islands	EPI_ISL_18096893	2023-07-01
BG	XBB.1.5	USA	EPI_ISL_18114395	2023-07-01
BG	XBB.1.5	USA	EPI_ISL_18057357	2023-07-01
BG	XBB.1.5	China	EPI_ISL_17987507	2023-07-01
BG	XBB.1.5	Costa Rica	EPI_ISL_18071487	2023-07-01
BG	XBB.1.5	Costa Rica	EPI_ISL_18071488	2023-07-01
BG	XBB.1.5	Canary Islands	EPI_ISL_18015817	2023-07-01
BG	XBB.1.5	Japan	EPI_ISL_18044063	2023-07-01
BG	XBB.1.5	China	EPI_ISL_18036766	2023-07-01
BG	XBB.1.5	USA	EPI_ISL_18081363	2023-07-01
BG	XBB.1.5	Canada	EPI_ISL_17990418	2023-07-01
BG	XBB.1.5	USA	EPI_ISL_18073866	2023-07-01
BG	XBB.1.5	Canada	EPI_ISL_18045120	2023-07-01
BG	XBB.1.5	USA	EPI_ISL_18080993	2023-07-01
BG	XBB.1.5	Japan	EPI_ISL_17982113	2023-07-01
BG	XBB.1.5	Canada	EPI_ISL_17990409	2023-07-01
BG	XBB.1.5	United Kingdom	EPI_ISL_17989797	2023-07-01
BG	XBB.1.5	Japan	EPI_ISL_18100921	2023-07-01
BG	XBB.1.5	Canada	EPI_ISL_17977995	2023-07-01
BG	XBB.1.5	USA	EPI_ISL_18005343	2023-07-01
BG	XBB.1.5	Spain	EPI_ISL_18000666	2023-07-01
BG	XBB.1.5	USA	EPI_ISL_18110709	2023-07-01
BG	XBB.1.5	France	EPI_ISL_18094540	2023-07-01
BG	XBB.1.5	USA	EPI_ISL_18045787	2023-07-01
BG	XBB.1.5	Sweden	EPI_ISL_18008253	2023-07-01
BG	XBB.1.5	Finland	EPI_ISL_17994800	2023-07-01
BG	XBB.1.5	Spain	EPI_ISL_18112529	2023-07-01
BG	XBB.1.5	USA	EPI_ISL_18081052	2023-07-01
BG	XBB.1.5	China	EPI_ISL_18036760	2023-07-01
BG	XBB.1.5	USA	EPI_ISL_18050249	2023-07-01
BG	XBB.1.5	USA	EPI_ISL_18077150	2023-07-01
BG	XBB.1.5	Singapore	EPI_ISL_18082479	2023-07-01
BG	XBB.1.5	USA	EPI_ISL_18113376	2023-07-01
BG	XBB.1.5	Spain	EPI_ISL_18059163	2023-07-01
BG	XBB.1.5	USA	EPI_ISL_18045347	2023-07-01
BG	XBB.1.5	USA	EPI_ISL_18037778	2023-07-01
BG	XBB.1.5.106	USA	EPI_ISL_18075270	2023-07-01
BG	XBB.1.5.72	Colombia	EPI_ISL_18071849	2023-07-01
BG	XBB.1.5.72	USA	EPI_ISL_18071323	2023-07-01
BG	XBB.1.5.72	Canada	EPI_ISL_18045125	2023-07-01
BG	XBB.1.5.72	USA	EPI_ISL_18114397	2023-07-01
BG	XBB.1.5.72	Spain	EPI_ISL_18113490	2023-07-01
BG	XBB.1.5.72	Colombia	EPI_ISL_18071850	2023-07-01
BG	XBB.1.5.72	USA	EPI_ISL_18038608	2023-07-01
BG	XBB.1.5.73	USA	EPI_ISL_18071327	2023-07-01
BG	XBB.1.5.73	USA	EPI_ISL_17971959	2023-07-01
BG	XBB.1.5.73	Peru	EPI_ISL_18043417	2023-07-01
BG	XBB.1.5.73	Canada	EPI_ISL_17990540	2023-07-01
BG	XBB.1.5.75	Peru	EPI_ISL_18043425	2023-07-01
BG	XBB.1.5.77	USA	EPI_ISL_18071326	2023-07-01
BG	XBB.1.5.77	Colombia	EPI_ISL_18071804	2023-07-01
BG	XBB.1.5.77	Israel	EPI_ISL_17973385	2023-07-01
BG	XBB.1.5.77	USA	EPI_ISL_18057492	2023-07-01
BG	XBB.1.5.86	Argentina	EPI_ISL_18101639	2023-07-01
BG	XBB.1.5.92	USA	EPI_ISL_18057501	2023-07-01
BG	XBB.1.5.95	USA	EPI_ISL_18046119	2023-07-01
BG	XBB.1.5.97	Australia	EPI_ISL_18012238	2023-07-01
BG	HA.1	Canary Islands	EPI_ISL_18015805	2023-07-02
BG	HR.1	USA	EPI_ISL_17981706	2023-07-02
BG	XBB.1.44.1	Japan	EPI_ISL_18100635	2023-07-02
BG	XBB.1.5	USA	EPI_ISL_18060463	2023-07-02
BG	XBB.1.5	USA	EPI_ISL_18046283	2023-07-02
BG	XBB.1.5	Canada	EPI_ISL_18001835	2023-07-02
BG	XBB.1.5	United Kingdom	EPI_ISL_18015593	2023-07-02
BG	XBB.1.5	Canada	EPI_ISL_17990548	2023-07-02
BG	XBB.1.5	USA	EPI_ISL_18080757	2023-07-02
BG	XBB.1.5	Canada	EPI_ISL_18030088	2023-07-02
BG	XBB.1.5	Japan	EPI_ISL_18066497	2023-07-02
BG	XBB.1.5	Canada	EPI_ISL_18001881	2023-07-02
BG	XBB.1.5	China	EPI_ISL_18034876	2023-07-02
BG	XBB.1.5	Costa Rica	EPI_ISL_18071485	2023-07-02
BG	XBB.1.5	USA	EPI_ISL_18046095	2023-07-02
BG	XBB.1.5	USA	EPI_ISL_18057641	2023-07-02
BG	XBB.1.5	USA	EPI_ISL_17996259	2023-07-02
BG	XBB.1.5	USA	EPI_ISL_17998587	2023-07-02
BG	XBB.1.5	USA	EPI_ISL_18045324	2023-07-02
BG	XBB.1.5	Sweden	EPI_ISL_18041923	2023-07-02
BG	XBB.1.5	Canada	EPI_ISL_18001841	2023-07-02
BG	XBB.1.5	China	EPI_ISL_17978557	2023-07-02
BG	XBB.1.5	USA	EPI_ISL_18073869	2023-07-02
BG	XBB.1.5	USA	EPI_ISL_18080973	2023-07-02
BG	XBB.1.5.103	Argentina	EPI_ISL_18095189	2023-07-02
BG	XBB.1.5.72	USA	EPI_ISL_18045043	2023-07-02
BG	XBB.1.5.72	USA	EPI_ISL_18045596	2023-07-02
BG	XBB.1.5.73	Peru	EPI_ISL_18043428	2023-07-02
BG	XBB.1.5.73	Peru	EPI_ISL_18043430	2023-07-02
BG	XBB.1.5.73	USA	EPI_ISL_17996262	2023-07-02
BG	XBB.1.5.77	Colombia	EPI_ISL_18071802	2023-07-02
BG	XBB.1.5.95	USA	EPI_ISL_17979330	2023-07-02
BG	GN.3	Peru	EPI_ISL_18043406	2023-07-03
BG	HA.1	Brazil	EPI_ISL_18099810	2023-07-03
BG	HA.1	Brazil	EPI_ISL_18079136	2023-07-03
BG	HA.1	Canary Islands	EPI_ISL_18015820	2023-07-03
BG	HQ.1	Canada	EPI_ISL_18001893	2023-07-03
BG	HQ.1	Dominican Republic	EPI_ISL_17990165	2023-07-03
BG	HR.1	USA	EPI_ISL_17985447	2023-07-03
BG	HR.1	Costa Rica	EPI_ISL_18110163	2023-07-03
BG	HR.1	USA	EPI_ISL_17985504	2023-07-03
BG	HT.1	USA	EPI_ISL_18080778	2023-07-03
BG	JD.1.1	Canada	EPI_ISL_18037173	2023-07-03
BG	JD.1.2	Brazil	EPI_ISL_18079143	2023-07-03
BG	XBB.1	USA	EPI_ISL_17994130	2023-07-03
BG	XBB.1.22	Italy	EPI_ISL_18072211	2023-07-03
BG	XBB.1.5	Japan	EPI_ISL_18047719	2023-07-03
BG	XBB.1.5	Argentina	EPI_ISL_18095157	2023-07-03
BG	XBB.1.5	Italy	EPI_ISL_18072212	2023-07-03
BG	XBB.1.5	USA	EPI_ISL_18045845	2023-07-03
BG	XBB.1.5	USA	EPI_ISL_17998601	2023-07-03
BG	XBB.1.5	Costa Rica	EPI_ISL_18071492	2023-07-03
BG	XBB.1.5	Finland	EPI_ISL_17994828	2023-07-03
BG	XBB.1.5	Costa Rica	EPI_ISL_18071558	2023-07-03
BG	XBB.1.5	Puerto Rico	EPI_ISL_18059983	2023-07-03
BG	XBB.1.5	France	EPI_ISL_18010083	2023-07-03
BG	XBB.1.5	Costa Rica	EPI_ISL_18071543	2023-07-03
BG	XBB.1.5	France	EPI_ISL_18010089	2023-07-03
BG	XBB.1.5	France	EPI_ISL_18010087	2023-07-03
BG	XBB.1.5	France	EPI_ISL_18010088	2023-07-03
BG	XBB.1.5	Canada	EPI_ISL_17990484	2023-07-03
BG	XBB.1.5	Mexico	EPI_ISL_17994140	2023-07-03
BG	XBB.1.5	USA	EPI_ISL_18057500	2023-07-03
BG	XBB.1.5	USA	EPI_ISL_18069921	2023-07-03
BG	XBB.1.5	USA	EPI_ISL_17998608	2023-07-03
BG	XBB.1.5	Japan	EPI_ISL_18040437	2023-07-03
BG	XBB.1.5	Japan	EPI_ISL_18000549	2023-07-03
BG	XBB.1.5	Denmark	EPI_ISL_17995484	2023-07-03
BG	XBB.1.5	USA	EPI_ISL_18022526	2023-07-03
BG	XBB.1.5	Japan	EPI_ISL_18006715	2023-07-03
BG	XBB.1.5	Japan	EPI_ISL_18044079	2023-07-03
BG	XBB.1.5	Japan	EPI_ISL_18066275	2023-07-03
BG	XBB.1.5	USA	EPI_ISL_18028419	2023-07-03
BG	XBB.1.5	Japan	EPI_ISL_18006671	2023-07-03
BG	XBB.1.5	Japan	EPI_ISL_18077773	2023-07-03
BG	XBB.1.5	USA	EPI_ISL_18045877	2023-07-03
BG	XBB.1.5	South Korea	EPI_ISL_18039102	2023-07-03
BG	XBB.1.5	France	EPI_ISL_18010132	2023-07-03
BG	XBB.1.5	Taiwan	EPI_ISL_18101310	2023-07-03
BG	XBB.1.5	Japan	EPI_ISL_18097853	2023-07-03
BG	XBB.1.5	Japan	EPI_ISL_18100927	2023-07-03
BG	XBB.1.5	Peru	EPI_ISL_18043409	2023-07-03
BG	XBB.1.5	Canada	EPI_ISL_18037168	2023-07-03
BG	XBB.1.5	USA	EPI_ISL_18080444	2023-07-03
BG	XBB.1.5	Canada	EPI_ISL_17990481	2023-07-03
BG	XBB.1.5	Costa Rica	EPI_ISL_18071544	2023-07-03
BG	XBB.1.5	USA	EPI_ISL_18046313	2023-07-03
BG	XBB.1.5	United Kingdom	EPI_ISL_18015573	2023-07-03
BG	XBB.1.5	USA	EPI_ISL_18080759	2023-07-03
BG	XBB.1.5	Canada	EPI_ISL_18001880	2023-07-03
BG	XBB.1.5	USA	EPI_ISL_18045062	2023-07-03
BG	XBB.1.5	Canada	EPI_ISL_18037105	2023-07-03
BG	XBB.1.5	Costa Rica	EPI_ISL_18110162	2023-07-03
BG	XBB.1.5	Japan	EPI_ISL_18047718	2023-07-03
BG	XBB.1.5	USA	EPI_ISL_18022568	2023-07-03
BG	XBB.1.5	Canada	EPI_ISL_18001851	2023-07-03
BG	XBB.1.5	USA	EPI_ISL_18022481	2023-07-03
BG	XBB.1.5	USA	EPI_ISL_18037772	2023-07-03
BG	XBB.1.5	France	EPI_ISL_18049017	2023-07-03
BG	XBB.1.5	USA	EPI_ISL_17998609	2023-07-03
BG	XBB.1.5	Spain	EPI_ISL_18010387	2023-07-03
BG	XBB.1.5	USA	EPI_ISL_18081055	2023-07-03
BG	XBB.1.5	USA	EPI_ISL_18080960	2023-07-03
BG	XBB.1.5	Puerto Rico	EPI_ISL_18059994	2023-07-03
BG	XBB.1.5	Japan	EPI_ISL_18040428	2023-07-03
BG	XBB.1.5	USA	EPI_ISL_17986667	2023-07-03
BG	XBB.1.5	Spain	EPI_ISL_17985105	2023-07-03
BG	XBB.1.5	Denmark	EPI_ISL_17995491	2023-07-03
BG	XBB.1.5	Costa Rica	EPI_ISL_18071534	2023-07-03
BG	XBB.1.5	Costa Rica	EPI_ISL_18071547	2023-07-03
BG	XBB.1.5	USA	EPI_ISL_18005358	2023-07-03
BG	XBB.1.5	Denmark	EPI_ISL_18052059	2023-07-03
BG	XBB.1.5	USA	EPI_ISL_18072345	2023-07-03
BG	XBB.1.5.100	USA	EPI_ISL_18081051	2023-07-03
BG	XBB.1.5.103	Argentina	EPI_ISL_18095353	2023-07-03
BG	XBB.1.5.104	USA	EPI_ISL_17996271	2023-07-03
BG	XBB.1.5.104	USA	EPI_ISL_17978967	2023-07-03
BG	XBB.1.5.106	USA	EPI_ISL_18046212	2023-07-03
BG	XBB.1.5.34	USA	EPI_ISL_18080593	2023-07-03
BG	XBB.1.5.72	USA	EPI_ISL_18022562	2023-07-03
BG	XBB.1.5.72	USA	EPI_ISL_17996281	2023-07-03
BG	XBB.1.5.72	USA	EPI_ISL_18022579	2023-07-03
BG	XBB.1.5.72	Iceland	EPI_ISL_17980590	2023-07-03
BG	XBB.1.5.72	USA	EPI_ISL_18037783	2023-07-03
BG	XBB.1.5.72	USA	EPI_ISL_18022549	2023-07-03
BG	XBB.1.5.72	Spain	EPI_ISL_18044035	2023-07-03
BG	XBB.1.5.72	Australia	EPI_ISL_17985072	2023-07-03
BG	XBB.1.5.72	Dominican Republic	EPI_ISL_18038413	2023-07-03
BG	XBB.1.5.73	USA	EPI_ISL_18005368	2023-07-03
BG	XBB.1.5.73	Canada	EPI_ISL_17977848	2023-07-03
BG	XBB.1.5.73	Canada	EPI_ISL_17993964	2023-07-03
BG	XBB.1.5.76	USA	EPI_ISL_18057464	2023-07-03
BG	XBB.1.5.77	USA	EPI_ISL_17986697	2023-07-03
BG	XBB.1.5.77	Costa Rica	EPI_ISL_18071557	2023-07-03
BG	XBB.1.5.77	USA	EPI_ISL_17985463	2023-07-03
BG	XBB.1.5.77	USA	EPI_ISL_18040123	2023-07-03
BG	XBB.1.5.77	USA	EPI_ISL_18022477	2023-07-03
BG	XBB.1.5.78	USA	EPI_ISL_18050254	2023-07-03
BG	XBB.1.5.89	Canada	EPI_ISL_17990396	2023-07-03
BG	XBB.1.5.90	Japan	EPI_ISL_18033115	2023-07-03
BG	XBB.1.5.94	Canada	EPI_ISL_18001882	2023-07-03
BG	XBB.1.5.95	Canada	EPI_ISL_18001887	2023-07-03
BG	GK.2	USA	EPI_ISL_18069716	2023-07-04
BG	GN.4	United Kingdom	EPI_ISL_18015565	2023-07-04
BG	HA.1	Canada	EPI_ISL_17978000	2023-07-04
BG	HA.2	USA	EPI_ISL_18046168	2023-07-04
BG	HD.1.1	Dominican Republic	EPI_ISL_17990166	2023-07-04
BG	JD.1.2	Brazil	EPI_ISL_18109265	2023-07-04
BG	XBB.1.5	South Korea	EPI_ISL_18038999	2023-07-04
BG	XBB.1.5	Canada	EPI_ISL_18037092	2023-07-04
BG	XBB.1.5	USA	EPI_ISL_18040121	2023-07-04
BG	XBB.1.5	USA	EPI_ISL_17985419	2023-07-04
BG	XBB.1.5	USA	EPI_ISL_17985540	2023-07-04
BG	XBB.1.5	Canada	EPI_ISL_17977839	2023-07-04
BG	XBB.1.5	Canada	EPI_ISL_17990432	2023-07-04
BG	XBB.1.5	South Korea	EPI_ISL_18046946	2023-07-04
BG	XBB.1.5	USA	EPI_ISL_18046205	2023-07-04
BG	XBB.1.5	USA	EPI_ISL_18082201	2023-07-04
BG	XBB.1.5	Canada	EPI_ISL_17990443	2023-07-04
BG	XBB.1.5	USA	EPI_ISL_18077161	2023-07-04
BG	XBB.1.5	South Korea	EPI_ISL_18038998	2023-07-04
BG	XBB.1.5	United Kingdom	EPI_ISL_18015637	2023-07-04
BG	XBB.1.5	USA	EPI_ISL_18005373	2023-07-04
BG	XBB.1.5	United Kingdom	EPI_ISL_18015713	2023-07-04
BG	XBB.1.5	South Korea	EPI_ISL_18046939	2023-07-04
BG	XBB.1.5	Japan	EPI_ISL_18039536	2023-07-04
BG	XBB.1.5	Japan	EPI_ISL_18040325	2023-07-04
BG	XBB.1.5	USA	EPI_ISL_18037788	2023-07-04
BG	XBB.1.5	Canada	EPI_ISL_17990455	2023-07-04
BG	XBB.1.5	South Korea	EPI_ISL_18046937	2023-07-04
BG	XBB.1.5	South Korea	EPI_ISL_18046940	2023-07-04
BG	XBB.1.5	South Korea	EPI_ISL_18047008	2023-07-04
BG	XBB.1.5	South Korea	EPI_ISL_18046781	2023-07-04
BG	XBB.1.5	USA	EPI_ISL_18110715	2023-07-04
BG	XBB.1.5	Costa Rica	EPI_ISL_18071560	2023-07-04
BG	XBB.1.5	Japan	EPI_ISL_18006637	2023-07-04
BG	XBB.1.5	Japan	EPI_ISL_18047752	2023-07-04
BG	XBB.1.5	Canada	EPI_ISL_17977867	2023-07-04
BG	XBB.1.5	USA	EPI_ISL_17996290	2023-07-04
BG	XBB.1.5	Colombia	EPI_ISL_18071798	2023-07-04
BG	XBB.1.5	USA	EPI_ISL_18060940	2023-07-04
BG	XBB.1.5	Argentina	EPI_ISL_18101652	2023-07-04
BG	XBB.1.5	Brazil	EPI_ISL_18078888	2023-07-04
BG	XBB.1.5	USA	EPI_ISL_18045063	2023-07-04
BG	XBB.1.5	USA	EPI_ISL_17998613	2023-07-04
BG	XBB.1.5	South Korea	EPI_ISL_18046857	2023-07-04
BG	XBB.1.5	USA	EPI_ISL_18005375	2023-07-04
BG	XBB.1.5	Italy	EPI_ISL_17990205	2023-07-04
BG	XBB.1.5	USA	EPI_ISL_18012797	2023-07-04
BG	XBB.1.5	France	EPI_ISL_18075960	2023-07-04
BG	XBB.1.5	USA	EPI_ISL_17985454	2023-07-04
BG	XBB.1.5	USA	EPI_ISL_17985553	2023-07-04
BG	XBB.1.5	South Korea	EPI_ISL_18039122	2023-07-04
BG	XBB.1.5	South Korea	EPI_ISL_18046885	2023-07-04
BG	XBB.1.5.103	Argentina	EPI_ISL_18095352	2023-07-04
BG	XBB.1.5.104	USA	EPI_ISL_18080624	2023-07-04
BG	XBB.1.5.105	USA	EPI_ISL_18037527	2023-07-04
BG	XBB.1.5.105	Canada	EPI_ISL_18037187	2023-07-04
BG	XBB.1.5.105	France	EPI_ISL_18075961	2023-07-04
BG	XBB.1.5.105	Ireland	EPI_ISL_17986420	2023-07-04
BG	XBB.1.5.72	USA	EPI_ISL_18054065	2023-07-04
BG	XBB.1.5.72	USA	EPI_ISL_17986693	2023-07-04
BG	XBB.1.5.72	USA	EPI_ISL_18093546	2023-07-04
BG	XBB.1.5.72	Switzerland	EPI_ISL_18034149	2023-07-04
BG	XBB.1.5.72	Italy	EPI_ISL_17990207	2023-07-04
BG	XBB.1.5.72	Germany	EPI_ISL_18050073	2023-07-04
BG	XBB.1.5.72	Switzerland	EPI_ISL_18034057	2023-07-04
BG	XBB.1.5.72	USA	EPI_ISL_18064803	2023-07-04
BG	XBB.1.5.73	Canada	EPI_ISL_17993965	2023-07-04
BG	XBB.1.5.73	Canada	EPI_ISL_17977849	2023-07-04
BG	XBB.1.5.73	Canada	EPI_ISL_17977846	2023-07-04
BG	XBB.1.5.77	Colombia	EPI_ISL_18071800	2023-07-04
BG	XBB.1.5.77	Costa Rica	EPI_ISL_18071559	2023-07-04
BG	XBB.1.5.77	USA	EPI_ISL_18107823	2023-07-04
BG	XBB.1.5.77	USA	EPI_ISL_17998611	2023-07-04
BG	XBB.1.5.89	Israel	EPI_ISL_18062753	2023-07-04
BG	XBB.1.5.90	Finland	EPI_ISL_17994831	2023-07-04
BG	XBB.1.5.96	China	EPI_ISL_18036857	2023-07-04
BG	XBB.1.5.97	USA	EPI_ISL_17998615	2023-07-04
BG	HA.2	USA	EPI_ISL_18038574	2023-07-05
BG	HA.2	USA	EPI_ISL_18045470	2023-07-05
BG	HD.1	Dominican Republic	EPI_ISL_17990171	2023-07-05
BG	HQ.1	Dominican Republic	EPI_ISL_17990182	2023-07-05
BG	HR.1	USA	EPI_ISL_18057638	2023-07-05
BG	XBB.1.22	USA	EPI_ISL_18057623	2023-07-05
BG	XBB.1.22	USA	EPI_ISL_18057636	2023-07-05
BG	XBB.1.33	Italy	EPI_ISL_18086984	2023-07-05
BG	XBB.1.5	South Korea	EPI_ISL_18047195	2023-07-05
BG	XBB.1.5	United Kingdom	EPI_ISL_18072019	2023-07-05
BG	XBB.1.5	USA	EPI_ISL_18022749	2023-07-05
BG	XBB.1.5	USA	EPI_ISL_18080695	2023-07-05
BG	XBB.1.5	USA	EPI_ISL_18080957	2023-07-05
BG	XBB.1.5	USA	EPI_ISL_18022700	2023-07-05
BG	XBB.1.5	USA	EPI_ISL_18080631	2023-07-05
BG	XBB.1.5	USA	EPI_ISL_18057421	2023-07-05
BG	XBB.1.5	Costa Rica	EPI_ISL_18071493	2023-07-05
BG	XBB.1.5	Costa Rica	EPI_ISL_18071491	2023-07-05
BG	XBB.1.5	USA	EPI_ISL_18044650	2023-07-05
BG	XBB.1.5	USA	EPI_ISL_18081004	2023-07-05
BG	XBB.1.5	USA	EPI_ISL_18050256	2023-07-05
BG	XBB.1.5	USA	EPI_ISL_18045074	2023-07-05
BG	XBB.1.5	USA	EPI_ISL_18080472	2023-07-05
BG	XBB.1.5	Puerto Rico	EPI_ISL_18059981	2023-07-05
BG	XBB.1.5	Puerto Rico	EPI_ISL_18059982	2023-07-05
BG	XBB.1.5	USA	EPI_ISL_18044653	2023-07-05
BG	XBB.1.5	USA	EPI_ISL_18073864	2023-07-05
BG	XBB.1.5	South Korea	EPI_ISL_18047065	2023-07-05
BG	XBB.1.5	South Korea	EPI_ISL_18047062	2023-07-05
BG	XBB.1.5	Portugal	EPI_ISL_18052418	2023-07-05
BG	XBB.1.5	USA	EPI_ISL_18012802	2023-07-05
BG	XBB.1.5	Costa Rica	EPI_ISL_18071548	2023-07-05
BG	XBB.1.5	Costa Rica	EPI_ISL_18071552	2023-07-05
BG	XBB.1.5	Costa Rica	EPI_ISL_18071549	2023-07-05
BG	XBB.1.5	Costa Rica	EPI_ISL_18071551	2023-07-05
BG	XBB.1.5	Costa Rica	EPI_ISL_18071553	2023-07-05
BG	XBB.1.5	USA	EPI_ISL_17985432	2023-07-05
BG	XBB.1.5	USA	EPI_ISL_18022792	2023-07-05
BG	XBB.1.5	USA	EPI_ISL_18071336	2023-07-05
BG	XBB.1.5	Sweden	EPI_ISL_18048710	2023-07-05
BG	XBB.1.5	Japan	EPI_ISL_18039532	2023-07-05
BG	XBB.1.5	Japan	EPI_ISL_18100684	2023-07-05
BG	XBB.1.5	USA	EPI_ISL_18082219	2023-07-05
BG	XBB.1.5	Japan	EPI_ISL_18097861	2023-07-05
BG	XBB.1.5	USA	EPI_ISL_18053081	2023-07-05
BG	XBB.1.5	Trinidad and Tobago	EPI_ISL_18050341	2023-07-05
BG	XBB.1.5	USA	EPI_ISL_18080943	2023-07-05
BG	XBB.1.5	Japan	EPI_ISL_18066263	2023-07-05
BG	XBB.1.5	USA	EPI_ISL_17996309	2023-07-05
BG	XBB.1.5	Japan	EPI_ISL_18010345	2023-07-05
BG	XBB.1.5	Italy	EPI_ISL_18072213	2023-07-05
BG	XBB.1.5	United Kingdom	EPI_ISL_18015570	2023-07-05
BG	XBB.1.5	USA	EPI_ISL_18090432	2023-07-05
BG	XBB.1.5	USA	EPI_ISL_18022783	2023-07-05
BG	XBB.1.5	Japan	EPI_ISL_18044106	2023-07-05
BG	XBB.1.5	USA	EPI_ISL_18046052	2023-07-05
BG	XBB.1.5	USA	EPI_ISL_18108130	2023-07-05
BG	XBB.1.5	USA	EPI_ISL_18030616	2023-07-05
BG	XBB.1.5	Colombia	EPI_ISL_18076894	2023-07-05
BG	XBB.1.5	USA	EPI_ISL_18022738	2023-07-05
BG	XBB.1.5	USA	EPI_ISL_18005377	2023-07-05
BG	XBB.1.5	USA	EPI_ISL_17986706	2023-07-05
BG	XBB.1.5	Costa Rica	EPI_ISL_18071564	2023-07-05
BG	XBB.1.5	USA	EPI_ISL_18057554	2023-07-05
BG	XBB.1.5	Canada	EPI_ISL_18043764	2023-07-05
BG	XBB.1.5	USA	EPI_ISL_18005379	2023-07-05
BG	XBB.1.5	South Korea	EPI_ISL_18047190	2023-07-05
BG	XBB.1.5	South Korea	EPI_ISL_18047185	2023-07-05
BG	XBB.1.5	Puerto Rico	EPI_ISL_18043033	2023-07-05
BG	XBB.1.5	Sweden	EPI_ISL_18067036	2023-07-05
BG	XBB.1.5	United Kingdom	EPI_ISL_18052775	2023-07-05
BG	XBB.1.5	USA	EPI_ISL_18045595	2023-07-05
BG	XBB.1.5	Dominican Republic	EPI_ISL_17990180	2023-07-05
BG	XBB.1.5	USA	EPI_ISL_18045753	2023-07-05
BG	XBB.1.5	USA	EPI_ISL_18005378	2023-07-05
BG	XBB.1.5	USA	EPI_ISL_18057659	2023-07-05
BG	XBB.1.5	USA	EPI_ISL_17996305	2023-07-05
BG	XBB.1.5	Australia	EPI_ISL_18032410	2023-07-05
BG	XBB.1.5.101	South Korea	EPI_ISL_18047123	2023-07-05
BG	XBB.1.5.101	South Korea	EPI_ISL_18047124	2023-07-05
BG	XBB.1.5.104	USA	EPI_ISL_18022632	2023-07-05
BG	XBB.1.5.72	Colombia	EPI_ISL_18076912	2023-07-05
BG	XBB.1.5.72	USA	EPI_ISL_17996319	2023-07-05
BG	XBB.1.5.72	Switzerland	EPI_ISL_18034093	2023-07-05
BG	XBB.1.5.72	USA	EPI_ISL_17996311	2023-07-05
BG	XBB.1.5.72	USA	EPI_ISL_18022780	2023-07-05
BG	XBB.1.5.72	USA	EPI_ISL_18022777	2023-07-05
BG	XBB.1.5.72	USA	EPI_ISL_18045634	2023-07-05
BG	XBB.1.5.72	USA	EPI_ISL_18022769	2023-07-05
BG	XBB.1.5.72	USA	EPI_ISL_18022716	2023-07-05
BG	XBB.1.5.72	Colombia	EPI_ISL_18076905	2023-07-05
BG	XBB.1.5.72	Colombia	EPI_ISL_18076909	2023-07-05
BG	XBB.1.5.72	Colombia	EPI_ISL_18076910	2023-07-05
BG	XBB.1.5.72	USA	EPI_ISL_18058049	2023-07-05
BG	XBB.1.5.72	USA	EPI_ISL_18080738	2023-07-05
BG	XBB.1.5.72	USA	EPI_ISL_18045869	2023-07-05
BG	XBB.1.5.72	Panama	EPI_ISL_18043471	2023-07-05
BG	XBB.1.5.73	Canada	EPI_ISL_17994035	2023-07-05
BG	XBB.1.5.75	USA	EPI_ISL_18045378	2023-07-05
BG	XBB.1.5.77	Colombia	EPI_ISL_18076931	2023-07-05
BG	XBB.1.5.77	Costa Rica	EPI_ISL_18071562	2023-07-05
BG	XBB.1.5.77	USA	EPI_ISL_18022626	2023-07-05
BG	XBB.1.5.77	Colombia	EPI_ISL_17960532	2023-07-05
BG	XBB.1.5.77	Colombia	EPI_ISL_17960524	2023-07-05
BG	XBB.1.5.77	Colombia	EPI_ISL_17960517	2023-07-05
BG	XBB.1.5.77	Puerto Rico	EPI_ISL_18043029	2023-07-05
BG	XBB.1.5.77	USA	EPI_ISL_18045965	2023-07-05
BG	XBB.1.5.77	USA	EPI_ISL_17996296	2023-07-05
BG	XBB.1.5.80	Peru	EPI_ISL_18043414	2023-07-05
BG	XBB.1.5.86	Dominican Republic	EPI_ISL_17990169	2023-07-05
BG	XBB.1.5.86	USA	EPI_ISL_18022761	2023-07-05
BG	XBB.1.5.89	United Kingdom	EPI_ISL_18010708	2023-07-05
BG	XBB.1.5.90	Japan	EPI_ISL_18040349	2023-07-05
BG	XBB.1.5.90	Japan	EPI_ISL_18097862	2023-07-05
BG	XBB.1.5.97	USA	EPI_ISL_18037533	2023-07-05
BG	XBB.1.5.97	Australia	EPI_ISL_17999376	2023-07-05
BG	HR.1	Canada	EPI_ISL_18037184	2023-07-06
BG	HR.1	China	EPI_ISL_17994414	2023-07-06
BG	JD.1.2	Brazil	EPI_ISL_18109266	2023-07-06
BG	XBB.1.5	USA	EPI_ISL_18055086	2023-07-06
BG	XBB.1.5	Spain	EPI_ISL_18042273	2023-07-06
BG	XBB.1.5	Japan	EPI_ISL_18013377	2023-07-06
BG	XBB.1.5	Costa Rica	EPI_ISL_18071486	2023-07-06
BG	XBB.1.5	USA	EPI_ISL_18057666	2023-07-06
BG	XBB.1.5	Canada	EPI_ISL_17993983	2023-07-06
BG	XBB.1.5	United Kingdom	EPI_ISL_18044400	2023-07-06
BG	XBB.1.5	South Korea	EPI_ISL_18047251	2023-07-06
BG	XBB.1.5	Japan	EPI_ISL_18040332	2023-07-06
BG	XBB.1.5	Japan	EPI_ISL_18040323	2023-07-06
BG	XBB.1.5	Canada	EPI_ISL_17996867	2023-07-06
BG	XBB.1.5	USA	EPI_ISL_18080789	2023-07-06
BG	XBB.1.5	Canada	EPI_ISL_18052976	2023-07-06
BG	XBB.1.5	USA	EPI_ISL_17986673	2023-07-06
BG	XBB.1.5	USA	EPI_ISL_18057616	2023-07-06
BG	XBB.1.5	USA	EPI_ISL_17996329	2023-07-06
BG	XBB.1.5	USA	EPI_ISL_18038635	2023-07-06
BG	XBB.1.5	Japan	EPI_ISL_18056400	2023-07-06
BG	XBB.1.5	China	EPI_ISL_18108677	2023-07-06
BG	XBB.1.5	Japan	EPI_ISL_18081983	2023-07-06
BG	XBB.1.5	Japan	EPI_ISL_18006697	2023-07-06
BG	XBB.1.5	Japan	EPI_ISL_18040342	2023-07-06
BG	XBB.1.5	Canada	EPI_ISL_18052891	2023-07-06
BG	XBB.1.5	USA	EPI_ISL_18057399	2023-07-06
BG	XBB.1.5	USA	EPI_ISL_18038620	2023-07-06
BG	XBB.1.5	USA	EPI_ISL_18038622	2023-07-06
BG	XBB.1.5	Greece	EPI_ISL_18096581	2023-07-06
BG	XBB.1.5	Spain	EPI_ISL_17985221	2023-07-06
BG	XBB.1.5	USA	EPI_ISL_18037786	2023-07-06
BG	XBB.1.5	USA	EPI_ISL_18081032	2023-07-06
BG	XBB.1.5	USA	EPI_ISL_18022867	2023-07-06
BG	XBB.1.5	USA	EPI_ISL_18037547	2023-07-06
BG	XBB.1.5	USA	EPI_ISL_18105223	2023-07-06
BG	XBB.1.5	Netherlands	EPI_ISL_17989862	2023-07-06
BG	XBB.1.5	USA	EPI_ISL_18022840	2023-07-06
BG	XBB.1.5	New Zealand	EPI_ISL_18047814	2023-07-06
BG	XBB.1.5	USA	EPI_ISL_18064468	2023-07-06
BG	XBB.1.5	USA	EPI_ISL_18080713	2023-07-06
BG	XBB.1.5	USA	EPI_ISL_18110073	2023-07-06
BG	XBB.1.5	USA	EPI_ISL_18037787	2023-07-06
BG	XBB.1.5	USA	EPI_ISL_18080959	2023-07-06
BG	XBB.1.5	France	EPI_ISL_18048972	2023-07-06
BG	XBB.1.5	USA	EPI_ISL_17996332	2023-07-06
BG	XBB.1.5	Spain	EPI_ISL_18075546	2023-07-06
BG	XBB.1.5	USA	EPI_ISL_18037543	2023-07-06
BG	XBB.1.5	USA	EPI_ISL_18045455	2023-07-06
BG	XBB.1.5	Japan	EPI_ISL_18048656	2023-07-06
BG	XBB.1.5	United Kingdom	EPI_ISL_18015554	2023-07-06
BG	XBB.1.5	United Kingdom	EPI_ISL_18015555	2023-07-06
BG	XBB.1.5	Japan	EPI_ISL_18006694	2023-07-06
BG	XBB.1.5	USA	EPI_ISL_18038638	2023-07-06
BG	XBB.1.5	USA	EPI_ISL_18057364	2023-07-06
BG	XBB.1.5	USA	EPI_ISL_18057635	2023-07-06
BG	XBB.1.5	Costa Rica	EPI_ISL_18071494	2023-07-06
BG	XBB.1.5	Spain	EPI_ISL_17989191	2023-07-06
BG	XBB.1.5	USA	EPI_ISL_18107854	2023-07-06
BG	XBB.1.5.104	Canada	EPI_ISL_18037140	2023-07-06
BG	XBB.1.5.104	Canada	EPI_ISL_18037085	2023-07-06
BG	XBB.1.5.105	Belgium	EPI_ISL_18075514	2023-07-06
BG	XBB.1.5.106	USA	EPI_ISL_18108133	2023-07-06
BG	XBB.1.5.38	South Korea	EPI_ISL_18047256	2023-07-06
BG	XBB.1.5.72	Colombia	EPI_ISL_18058310	2023-07-06
BG	XBB.1.5.72	Colombia	EPI_ISL_18071813	2023-07-06
BG	XBB.1.5.72	Colombia	EPI_ISL_18076920	2023-07-06
BG	XBB.1.5.72	Colombia	EPI_ISL_18076904	2023-07-06
BG	XBB.1.5.72	Colombia	EPI_ISL_18071847	2023-07-06
BG	XBB.1.5.72	Colombia	EPI_ISL_18076908	2023-07-06
BG	XBB.1.5.72	Canada	EPI_ISL_17994056	2023-07-06
BG	XBB.1.5.72	USA	EPI_ISL_17981865	2023-07-06
BG	XBB.1.5.72	Panama	EPI_ISL_18043473	2023-07-06
BG	XBB.1.5.73	Canada	EPI_ISL_17994045	2023-07-06
BG	XBB.1.5.75	USA	EPI_ISL_18038636	2023-07-06
BG	XBB.1.5.75	USA	EPI_ISL_18038672	2023-07-06
BG	XBB.1.5.77	Colombia	EPI_ISL_18076933	2023-07-06
BG	XBB.1.5.77	USA	EPI_ISL_18008694	2023-07-06
BG	XBB.1.5.77	Colombia	EPI_ISL_18076937	2023-07-06
BG	XBB.1.5.77	Colombia	EPI_ISL_18071811	2023-07-06
BG	XBB.1.5.77	Colombia	EPI_ISL_18071833	2023-07-06
BG	XBB.1.5.77	Colombia	EPI_ISL_18071790	2023-07-06
BG	XBB.1.5.89	Israel	EPI_ISL_18062754	2023-07-06
BG	XBB.1.5.90	Japan	EPI_ISL_18006690	2023-07-06
BG	XBB.1.5.92	USA	EPI_ISL_18081014	2023-07-06
BG	XBB.1.5.94	Portugal	EPI_ISL_18052443	2023-07-06
BG	XBB.1.5.95	USA	EPI_ISL_18107624	2023-07-06
BG	XBB.1.5.95	USA	EPI_ISL_18080704	2023-07-06
BG	XBB.1.5.97	Japan	EPI_ISL_18013341	2023-07-06
BG	GN.4	Spain	EPI_ISL_17985210	2023-07-07
BG	GN.4	USA	EPI_ISL_18045080	2023-07-07
BG	GN.4	Spain	EPI_ISL_18071574	2023-07-07
BG	HA.1	Spain	EPI_ISL_18042276	2023-07-07
BG	HA.2	USA	EPI_ISL_18049288	2023-07-07
BG	XBB.1.5	Japan	EPI_ISL_18051402	2023-07-07
BG	XBB.1.5	USA	EPI_ISL_18081321	2023-07-07
BG	XBB.1.5	USA	EPI_ISL_17996356	2023-07-07
BG	XBB.1.5	Canada	EPI_ISL_18052892	2023-07-07
BG	XBB.1.5	Japan	EPI_ISL_18040474	2023-07-07
BG	XBB.1.5	Portugal	EPI_ISL_18052416	2023-07-07
BG	XBB.1.5	USA	EPI_ISL_17996363	2023-07-07
BG	XBB.1.5	South Korea	EPI_ISL_18047323	2023-07-07
BG	XBB.1.5	USA	EPI_ISL_18053737	2023-07-07
BG	XBB.1.5	USA	EPI_ISL_18076996	2023-07-07
BG	XBB.1.5	USA	EPI_ISL_18057680	2023-07-07
BG	XBB.1.5	USA	EPI_ISL_17996347	2023-07-07
BG	XBB.1.5	USA	EPI_ISL_18073886	2023-07-07
BG	XBB.1.5	Canada	EPI_ISL_18052967	2023-07-07
BG	XBB.1.5	Canada	EPI_ISL_18045258	2023-07-07
BG	XBB.1.5	Japan	EPI_ISL_18047735	2023-07-07
BG	XBB.1.5	USA	EPI_ISL_18044658	2023-07-07
BG	XBB.1.5	USA	EPI_ISL_18057660	2023-07-07
BG	XBB.1.5	Ecuador	EPI_ISL_18075523	2023-07-07
BG	XBB.1.5	USA	EPI_ISL_18107869	2023-07-07
BG	XBB.1.5	Canada	EPI_ISL_18045297	2023-07-07
BG	XBB.1.5	USA	EPI_ISL_17996368	2023-07-07
BG	XBB.1.5	Japan	EPI_ISL_18040469	2023-07-07
BG	XBB.1.5	USA	EPI_ISL_18037562	2023-07-07
BG	XBB.1.5	USA	EPI_ISL_18090455	2023-07-07
BG	XBB.1.5	Canada	EPI_ISL_18053015	2023-07-07
BG	XBB.1.5	USA	EPI_ISL_18022972	2023-07-07
BG	XBB.1.5	Costa Rica	EPI_ISL_18071483	2023-07-07
BG	XBB.1.5	Panama	EPI_ISL_18043475	2023-07-07
BG	XBB.1.5	Panama	EPI_ISL_18043477	2023-07-07
BG	XBB.1.5	USA	EPI_ISL_18022981	2023-07-07
BG	XBB.1.5	USA	EPI_ISL_18053734	2023-07-07
BG	XBB.1.5	USA	EPI_ISL_17996366	2023-07-07
BG	XBB.1.5	USA	EPI_ISL_18045961	2023-07-07
BG	XBB.1.5	USA	EPI_ISL_17996348	2023-07-07
BG	XBB.1.5	Canada	EPI_ISL_18052955	2023-07-07
BG	XBB.1.5	USA	EPI_ISL_17996087	2023-07-07
BG	XBB.1.5	USA	EPI_ISL_17996115	2023-07-07
BG	XBB.1.5	USA	EPI_ISL_18080792	2023-07-07
BG	XBB.1.5	Spain	EPI_ISL_18112549	2023-07-07
BG	XBB.1.5	USA	EPI_ISL_18082014	2023-07-07
BG	XBB.1.5	Argentina	EPI_ISL_18095192	2023-07-07
BG	XBB.1.5	Argentina	EPI_ISL_18095193	2023-07-07
BG	XBB.1.5	USA	EPI_ISL_18057525	2023-07-07
BG	XBB.1.5.100	USA	EPI_ISL_18080689	2023-07-07
BG	XBB.1.5.100	China	EPI_ISL_18074686	2023-07-07
BG	XBB.1.5.100	USA	EPI_ISL_17996353	2023-07-07
BG	XBB.1.5.72	Canada	EPI_ISL_18045250	2023-07-07
BG	XBB.1.5.72	Colombia	EPI_ISL_18071803	2023-07-07
BG	XBB.1.5.72	USA	EPI_ISL_18037565	2023-07-07
BG	XBB.1.5.72	USA	EPI_ISL_17996374	2023-07-07
BG	XBB.1.5.72	USA	EPI_ISL_18045636	2023-07-07
BG	XBB.1.5.72	USA	EPI_ISL_18037567	2023-07-07
BG	XBB.1.5.72	Colombia	EPI_ISL_18076921	2023-07-07
BG	XBB.1.5.72	Colombia	EPI_ISL_18071843	2023-07-07
BG	XBB.1.5.72	Colombia	EPI_ISL_18071799	2023-07-07
BG	XBB.1.5.72	USA	EPI_ISL_18050259	2023-07-07
BG	XBB.1.5.72	Colombia	EPI_ISL_18071846	2023-07-07
BG	XBB.1.5.73	USA	EPI_ISL_18080790	2023-07-07
BG	XBB.1.5.73	USA	EPI_ISL_18022983	2023-07-07
BG	XBB.1.5.77	Colombia	EPI_ISL_18071852	2023-07-07
BG	XBB.1.5.77	USA	EPI_ISL_18045078	2023-07-07
BG	XBB.1.5.77	USA	EPI_ISL_18022944	2023-07-07
BG	XBB.1.5.77	USA	EPI_ISL_18045638	2023-07-07
BG	XBB.1.5.77	USA	EPI_ISL_18005381	2023-07-07
BG	XBB.1.5.77	USA	EPI_ISL_18053049	2023-07-07
BG	XBB.1.5.77	Colombia	EPI_ISL_18076944	2023-07-07
BG	XBB.1.5.77	Colombia	EPI_ISL_18071796	2023-07-07
BG	XBB.1.5.77	Colombia	EPI_ISL_18076948	2023-07-07
BG	XBB.1.5.77	Colombia	EPI_ISL_18076930	2023-07-07
BG	XBB.1.5.77	USA	EPI_ISL_18057624	2023-07-07
BG	XBB.1.5.83	Canada	EPI_ISL_18030086	2023-07-07
BG	XBB.1.5.86	South Korea	EPI_ISL_18047369	2023-07-07
BG	XBB.1.5.86	South Korea	EPI_ISL_18047368	2023-07-07
BG	XBB.1.5.88	South Africa	EPI_ISL_18108961	2023-07-07
BG	XBB.1.5.89	France	EPI_ISL_18048974	2023-07-07
BG	XBB.1.5.92	USA	EPI_ISL_18012775	2023-07-07
BG	GK.1	Spain	EPI_ISL_18042285	2023-07-08
BG	GK.1	Brazil	EPI_ISL_18078895	2023-07-08
BG	GK.2	Luxembourg	EPI_ISL_18107128	2023-07-08
BG	GN.4	USA	EPI_ISL_18080441	2023-07-08
BG	GN.4	USA	EPI_ISL_18077001	2023-07-08
BG	GN.4	Spain	EPI_ISL_17985201	2023-07-08
BG	HR.1	USA	EPI_ISL_18069973	2023-07-08
BG	XBB.1.5	Canada	EPI_ISL_18030442	2023-07-08
BG	XBB.1.5	South Korea	EPI_ISL_18047428	2023-07-08
BG	XBB.1.5	Canada	EPI_ISL_18053002	2023-07-08
BG	XBB.1.5	South Korea	EPI_ISL_18047448	2023-07-08
BG	XBB.1.5	Japan	EPI_ISL_18100967	2023-07-08
BG	XBB.1.5	Japan	EPI_ISL_18040471	2023-07-08
BG	XBB.1.5	Japan	EPI_ISL_18075783	2023-07-08
BG	XBB.1.5	USA	EPI_ISL_18069647	2023-07-08
BG	XBB.1.5	USA	EPI_ISL_18057547	2023-07-08
BG	XBB.1.5	USA	EPI_ISL_18105266	2023-07-08
BG	XBB.1.5	USA	EPI_ISL_18057528	2023-07-08
BG	XBB.1.5	USA	EPI_ISL_18054786	2023-07-08
BG	XBB.1.5	South Korea	EPI_ISL_18047414	2023-07-08
BG	XBB.1.5	USA	EPI_ISL_18037805	2023-07-08
BG	XBB.1.5	South Korea	EPI_ISL_18047470	2023-07-08
BG	XBB.1.5	South Korea	EPI_ISL_18047471	2023-07-08
BG	XBB.1.5	USA	EPI_ISL_18045702	2023-07-08
BG	XBB.1.5	Spain	EPI_ISL_17985217	2023-07-08
BG	XBB.1.5	USA	EPI_ISL_18037569	2023-07-08
BG	XBB.1.5	Italy	EPI_ISL_18008482	2023-07-08
BG	XBB.1.5	Portugal	EPI_ISL_18052350	2023-07-08
BG	XBB.1.5	Colombia	EPI_ISL_18071855	2023-07-08
BG	XBB.1.5.102	USA	EPI_ISL_17996090	2023-07-08
BG	XBB.1.5.105	Canada	EPI_ISL_18046487	2023-07-08
BG	XBB.1.5.72	Canada	EPI_ISL_18052921	2023-07-08
BG	XBB.1.5.72	USA	EPI_ISL_18065599	2023-07-08
BG	XBB.1.5.72	Spain	EPI_ISL_18008602	2023-07-08
BG	XBB.1.5.72	USA	EPI_ISL_18037568	2023-07-08
BG	XBB.1.5.72	Canada	EPI_ISL_18037087	2023-07-08
BG	XBB.1.5.73	South Korea	EPI_ISL_18039147	2023-07-08
BG	XBB.1.5.77	USA	EPI_ISL_18023002	2023-07-08
BG	XBB.1.5.77	USA	EPI_ISL_18045641	2023-07-08
BG	XBB.1.5.81	USA	EPI_ISL_18040092	2023-07-08
BG	GN.4	USA	EPI_ISL_18077012	2023-07-09
BG	HA.1	Canada	EPI_ISL_18052900	2023-07-09
BG	JD.1.2	Brazil	EPI_ISL_18109267	2023-07-09
BG	XBB.1.5	South Korea	EPI_ISL_18039170	2023-07-09
BG	XBB.1.5	Costa Rica	EPI_ISL_18071457	2023-07-09
BG	XBB.1.5	Colombia	EPI_ISL_18071787	2023-07-09
BG	XBB.1.5	France	EPI_ISL_18048978	2023-07-09
BG	XBB.1.5	Canada	EPI_ISL_18062472	2023-07-09
BG	XBB.1.5	USA	EPI_ISL_18045834	2023-07-09
BG	XBB.1.5	USA	EPI_ISL_18053791	2023-07-09
BG	XBB.1.5	USA	EPI_ISL_18057626	2023-07-09
BG	XBB.1.5	South Korea	EPI_ISL_18047647	2023-07-09
BG	XBB.1.5	USA	EPI_ISL_18023043	2023-07-09
BG	XBB.1.5	Japan	EPI_ISL_18040345	2023-07-09
BG	XBB.1.5	Canada	EPI_ISL_18037119	2023-07-09
BG	XBB.1.5	Portugal	EPI_ISL_18052382	2023-07-09
BG	XBB.1.5	USA	EPI_ISL_18060947	2023-07-09
BG	XBB.1.5	USA	EPI_ISL_18107875	2023-07-09
BG	XBB.1.5	USA	EPI_ISL_18053780	2023-07-09
BG	XBB.1.5	South Korea	EPI_ISL_18047615	2023-07-09
BG	XBB.1.5	United Kingdom	EPI_ISL_18078346	2023-07-09
BG	XBB.1.5	USA	EPI_ISL_18028432	2023-07-09
BG	XBB.1.5	USA	EPI_ISL_18065602	2023-07-09
BG	XBB.1.5	USA	EPI_ISL_18053796	2023-07-09
BG	XBB.1.5	Portugal	EPI_ISL_18052438	2023-07-09
BG	XBB.1.5	Canada	EPI_ISL_18037073	2023-07-09
BG	XBB.1.5	Canada	EPI_ISL_18037118	2023-07-09
BG	XBB.1.5	Israel	EPI_ISL_18012532	2023-07-09
BG	XBB.1.5	South Korea	EPI_ISL_18047621	2023-07-09
BG	XBB.1.5	USA	EPI_ISL_18082020	2023-07-09
BG	XBB.1.5	Sweden	EPI_ISL_18009604	2023-07-09
BG	XBB.1.5	USA	EPI_ISL_18082203	2023-07-09
BG	XBB.1.5	USA	EPI_ISL_18058215	2023-07-09
BG	XBB.1.5	USA	EPI_ISL_18057422	2023-07-09
BG	XBB.1.5.72	Colombia	EPI_ISL_18076918	2023-07-09
BG	XBB.1.5.72	Costa Rica	EPI_ISL_18071482	2023-07-09
BG	XBB.1.5.72	Spain	EPI_ISL_18098536	2023-07-09
BG	XBB.1.5.72	USA	EPI_ISL_18080509	2023-07-09
BG	XBB.1.5.72	USA	EPI_ISL_18045652	2023-07-09
BG	XBB.1.5.72	USA	EPI_ISL_18107644	2023-07-09
BG	XBB.1.5.72	Canada	EPI_ISL_17996881	2023-07-09
BG	XBB.1.5.72	Colombia	EPI_ISL_18071844	2023-07-09
BG	XBB.1.5.77	South Korea	EPI_ISL_18062941	2023-07-09
BG	GK.2	USA	EPI_ISL_18080711	2023-07-10
BG	GK.2.1	Italy	EPI_ISL_17990202	2023-07-10
BG	GN.4	USA	EPI_ISL_18053804	2023-07-10
BG	HA.1	Spain	EPI_ISL_18118229	2023-07-10
BG	HA.2	USA	EPI_ISL_18053824	2023-07-10
BG	HD.1.1	Dominican Republic	EPI_ISL_17990195	2023-07-10
BG	HQ.1	Dominican Republic	EPI_ISL_17990188	2023-07-10
BG	HQ.1	Spain	EPI_ISL_18042260	2023-07-10
BG	HQ.1	Ecuador	EPI_ISL_18075521	2023-07-10
BG	HQ.1	Ecuador	EPI_ISL_18075528	2023-07-10
BG	HR.1	Australia	EPI_ISL_18060390	2023-07-10
BG	HR.1	USA	EPI_ISL_18037597	2023-07-10
BG	HR.1	USA	EPI_ISL_18037586	2023-07-10
BG	HR.1	USA	EPI_ISL_18037585	2023-07-10
BG	JD.2	USA	EPI_ISL_18057676	2023-07-10
BG	XBB.1.22	Italy	EPI_ISL_18072215	2023-07-10
BG	XBB.1.5	USA	EPI_ISL_18080827	2023-07-10
BG	XBB.1.5	Italy	EPI_ISL_18072216	2023-07-10
BG	XBB.1.5	Canada	EPI_ISL_17994059	2023-07-10
BG	XBB.1.5	Costa Rica	EPI_ISL_18071456	2023-07-10
BG	XBB.1.5	USA	EPI_ISL_18080921	2023-07-10
BG	XBB.1.5	USA	EPI_ISL_18080928	2023-07-10
BG	XBB.1.5	South Korea	EPI_ISL_18067510	2023-07-10
BG	XBB.1.5	Japan	EPI_ISL_18096964	2023-07-10
BG	XBB.1.5	France	EPI_ISL_18044678	2023-07-10
BG	XBB.1.5	South Korea	EPI_ISL_18067438	2023-07-10
BG	XBB.1.5	Costa Rica	EPI_ISL_18071458	2023-07-10
BG	XBB.1.5	USA	EPI_ISL_18053818	2023-07-10
BG	XBB.1.5	France	EPI_ISL_18070044	2023-07-10
BG	XBB.1.5	France	EPI_ISL_18049091	2023-07-10
BG	XBB.1.5	Canada	EPI_ISL_18062473	2023-07-10
BG	XBB.1.5	USA	EPI_ISL_18037581	2023-07-10
BG	XBB.1.5	Japan	EPI_ISL_18096967	2023-07-10
BG	XBB.1.5	USA	EPI_ISL_17996384	2023-07-10
BG	XBB.1.5	China	EPI_ISL_18108667	2023-07-10
BG	XBB.1.5	Japan	EPI_ISL_18040353	2023-07-10
BG	XBB.1.5	China	EPI_ISL_18074210	2023-07-10
BG	XBB.1.5	Japan	EPI_ISL_18050884	2023-07-10
BG	XBB.1.5	Ecuador	EPI_ISL_18075518	2023-07-10
BG	XBB.1.5	Canada	EPI_ISL_18052961	2023-07-10
BG	XBB.1.5	USA	EPI_ISL_18053844	2023-07-10
BG	XBB.1.5	USA	EPI_ISL_18053841	2023-07-10
BG	XBB.1.5	Ecuador	EPI_ISL_18075524	2023-07-10
BG	XBB.1.5	Japan	EPI_ISL_18067264	2023-07-10
BG	XBB.1.5	USA	EPI_ISL_18077019	2023-07-10
BG	XBB.1.5	USA	EPI_ISL_18053847	2023-07-10
BG	XBB.1.5	USA	EPI_ISL_18046494	2023-07-10
BG	XBB.1.5	France	EPI_ISL_18076130	2023-07-10
BG	XBB.1.5	France	EPI_ISL_18076148	2023-07-10
BG	XBB.1.5	Spain	EPI_ISL_18059169	2023-07-10
BG	XBB.1.5	Ecuador	EPI_ISL_18075520	2023-07-10
BG	XBB.1.5	United Kingdom	EPI_ISL_18044434	2023-07-10
BG	XBB.1.5	USA	EPI_ISL_18053848	2023-07-10
BG	XBB.1.5	Canada	EPI_ISL_18052998	2023-07-10
BG	XBB.1.5	USA	EPI_ISL_18055470	2023-07-10
BG	XBB.1.5	Canada	EPI_ISL_17994079	2023-07-10
BG	XBB.1.5	USA	EPI_ISL_18049925	2023-07-10
BG	XBB.1.5	Denmark	EPI_ISL_18052056	2023-07-10
BG	XBB.1.5	USA	EPI_ISL_18028433	2023-07-10
BG	XBB.1.5	USA	EPI_ISL_18108141	2023-07-10
BG	XBB.1.5	USA	EPI_ISL_18108140	2023-07-10
BG	XBB.1.5	Canada	EPI_ISL_18052957	2023-07-10
BG	XBB.1.5	USA	EPI_ISL_18045491	2023-07-10
BG	XBB.1.5	South Korea	EPI_ISL_18067553	2023-07-10
BG	XBB.1.5	Thailand	EPI_ISL_18042063	2023-07-10
BG	XBB.1.5	USA	EPI_ISL_18082205	2023-07-10
BG	XBB.1.5	USA	EPI_ISL_18053817	2023-07-10
BG	XBB.1.5	South Korea	EPI_ISL_18067483	2023-07-10
BG	XBB.1.5	USA	EPI_ISL_18045344	2023-07-10
BG	XBB.1.5	Germany	EPI_ISL_18050007	2023-07-10
BG	XBB.1.5	Denmark	EPI_ISL_18052021	2023-07-10
BG	XBB.1.5	Denmark	EPI_ISL_18052039	2023-07-10
BG	XBB.1.5	Portugal	EPI_ISL_18052388	2023-07-10
BG	XBB.1.5	Israel	EPI_ISL_18012537	2023-07-10
BG	XBB.1.5	Japan	EPI_ISL_18058375	2023-07-10
BG	XBB.1.5	USA	EPI_ISL_18045946	2023-07-10
BG	XBB.1.5	USA	EPI_ISL_18081040	2023-07-10
BG	XBB.1.5	USA	EPI_ISL_18040148	2023-07-10
BG	XBB.1.5	Japan	EPI_ISL_18100987	2023-07-10
BG	XBB.1.5	Japan	EPI_ISL_18060246	2023-07-10
BG	XBB.1.5	USA	EPI_ISL_18057675	2023-07-10
BG	XBB.1.5	Japan	EPI_ISL_18039508	2023-07-10
BG	XBB.1.5	France	EPI_ISL_18076064	2023-07-10
BG	XBB.1.5	USA	EPI_ISL_18057603	2023-07-10
BG	XBB.1.5.100	USA	EPI_ISL_18057650	2023-07-10
BG	XBB.1.5.103	Argentina	EPI_ISL_18095354	2023-07-10
BG	XBB.1.5.40	USA	EPI_ISL_18093550	2023-07-10
BG	XBB.1.5.47	USA	EPI_ISL_18038646	2023-07-10
BG	XBB.1.5.72	Colombia	EPI_ISL_18076922	2023-07-10
BG	XBB.1.5.72	USA	EPI_ISL_18045360	2023-07-10
BG	XBB.1.5.72	Spain	EPI_ISL_18049178	2023-07-10
BG	XBB.1.5.72	Italy	EPI_ISL_18032356	2023-07-10
BG	XBB.1.5.72	Canada	EPI_ISL_18030436	2023-07-10
BG	XBB.1.5.72	Colombia	EPI_ISL_18076913	2023-07-10
BG	XBB.1.5.72	Colombia	EPI_ISL_18071854	2023-07-10
BG	XBB.1.5.72	USA	EPI_ISL_18071319	2023-07-10
BG	XBB.1.5.72	Panama	EPI_ISL_18043478	2023-07-10
BG	XBB.1.5.72	Spain	EPI_ISL_18015758	2023-07-10
BG	XBB.1.5.72	USA	EPI_ISL_18053809	2023-07-10
BG	XBB.1.5.72	Canada	EPI_ISL_18052893	2023-07-10
BG	XBB.1.5.72	Spain	EPI_ISL_18010389	2023-07-10
BG	XBB.1.5.73	Canada	EPI_ISL_17994081	2023-07-10
BG	XBB.1.5.77	France	EPI_ISL_18076093	2023-07-10
BG	XBB.1.5.77	USA	EPI_ISL_18053850	2023-07-10
BG	XBB.1.5.77	USA	EPI_ISL_18053862	2023-07-10
BG	XBB.1.5.77	Puerto Rico	EPI_ISL_18090739	2023-07-10
BG	XBB.1.5.77	Colombia	EPI_ISL_18071801	2023-07-10
BG	XBB.1.5.80	Canada	EPI_ISL_18053003	2023-07-10
BG	XBB.1.5.80	Canada	EPI_ISL_18052984	2023-07-10
BG	XBB.1.5.81	USA	EPI_ISL_18080953	2023-07-10
BG	XBB.1.5.89	Israel	EPI_ISL_18012531	2023-07-10
BG	XBB.1.5.92	Canada	EPI_ISL_18030445	2023-07-10
BG	XBB.1.9.1	Italy	EPI_ISL_18013181	2023-07-10
BG	HA.1	Canary Islands	EPI_ISL_18044949	2023-07-11
BG	HR.1	Costa Rica	EPI_ISL_18071461	2023-07-11
BG	XBB.1.5	South Korea	EPI_ISL_18067589	2023-07-11
BG	XBB.1.5	Singapore	EPI_ISL_17996616	2023-07-11
BG	XBB.1.5	United Kingdom	EPI_ISL_18052553	2023-07-11
BG	XBB.1.5	Japan	EPI_ISL_18097791	2023-07-11
BG	XBB.1.5	South Korea	EPI_ISL_18067608	2023-07-11
BG	XBB.1.5	Japan	EPI_ISL_18050891	2023-07-11
BG	XBB.1.5	USA	EPI_ISL_18044664	2023-07-11
BG	XBB.1.5	Japan	EPI_ISL_18051813	2023-07-11
BG	XBB.1.5	Canary Islands	EPI_ISL_18044951	2023-07-11
BG	XBB.1.5	China	EPI_ISL_18074212	2023-07-11
BG	XBB.1.5	USA	EPI_ISL_18069682	2023-07-11
BG	XBB.1.5	Costa Rica	EPI_ISL_18071460	2023-07-11
BG	XBB.1.5	Switzerland	EPI_ISL_18034103	2023-07-11
BG	XBB.1.5	USA	EPI_ISL_18057575	2023-07-11
BG	XBB.1.5	USA	EPI_ISL_18054799	2023-07-11
BG	XBB.1.5	Canada	EPI_ISL_17996889	2023-07-11
BG	XBB.1.5	Japan	EPI_ISL_18075794	2023-07-11
BG	XBB.1.5	Japan	EPI_ISL_18075793	2023-07-11
BG	XBB.1.5	China	EPI_ISL_18074213	2023-07-11
BG	XBB.1.5	USA	EPI_ISL_18110089	2023-07-11
BG	XBB.1.5	USA	EPI_ISL_18044665	2023-07-11
BG	XBB.1.5	Canada	EPI_ISL_18052972	2023-07-11
BG	XBB.1.5	Spain	EPI_ISL_17985213	2023-07-11
BG	XBB.1.5	USA	EPI_ISL_18053868	2023-07-11
BG	XBB.1.5	Spain	EPI_ISL_18059172	2023-07-11
BG	XBB.1.5	Spain	EPI_ISL_18106862	2023-07-11
BG	XBB.1.5	USA	EPI_ISL_18069776	2023-07-11
BG	XBB.1.5	USA	EPI_ISL_18045405	2023-07-11
BG	XBB.1.5	South Korea	EPI_ISL_18067716	2023-07-11
BG	XBB.1.5	Canary Islands	EPI_ISL_18096885	2023-07-11
BG	XBB.1.5	Argentina	EPI_ISL_18101634	2023-07-11
BG	XBB.1.5	USA	EPI_ISL_18054704	2023-07-11
BG	XBB.1.5	Thailand	EPI_ISL_18042058	2023-07-11
BG	XBB.1.5	USA	EPI_ISL_18057789	2023-07-11
BG	XBB.1.5	Italy	EPI_ISL_18015782	2023-07-11
BG	XBB.1.5	USA	EPI_ISL_18037622	2023-07-11
BG	XBB.1.5	USA	EPI_ISL_18069699	2023-07-11
BG	XBB.1.5	USA	EPI_ISL_18069755	2023-07-11
BG	XBB.1.5	Luxembourg	EPI_ISL_18107152	2023-07-11
BG	XBB.1.5	Spain	EPI_ISL_18049134	2023-07-11
BG	XBB.1.5	USA	EPI_ISL_18093317	2023-07-11
BG	XBB.1.5	United Kingdom	EPI_ISL_18044409	2023-07-11
BG	XBB.1.5	Colombia	EPI_ISL_18076898	2023-07-11
BG	XBB.1.5	Canary Islands	EPI_ISL_18044952	2023-07-11
BG	XBB.1.5	USA	EPI_ISL_18030637	2023-07-11
BG	XBB.1.5	USA	EPI_ISL_18057588	2023-07-11
BG	XBB.1.5	South Korea	EPI_ISL_18063102	2023-07-11
BG	XBB.1.5.104	South Korea	EPI_ISL_18067748	2023-07-11
BG	XBB.1.5.104	USA	EPI_ISL_18053909	2023-07-11
BG	XBB.1.5.105	USA	EPI_ISL_18055480	2023-07-11
BG	XBB.1.5.38	South Korea	EPI_ISL_18062972	2023-07-11
BG	XBB.1.5.55	Japan	EPI_ISL_18075795	2023-07-11
BG	XBB.1.5.72	Costa Rica	EPI_ISL_18071496	2023-07-11
BG	XBB.1.5.72	USA	EPI_ISL_18053891	2023-07-11
BG	XBB.1.5.72	Italy	EPI_ISL_18032181	2023-07-11
BG	XBB.1.5.72	Switzerland	EPI_ISL_18034036	2023-07-11
BG	XBB.1.5.72	Colombia	EPI_ISL_18071845	2023-07-11
BG	XBB.1.5.72	South Korea	EPI_ISL_18067771	2023-07-11
BG	XBB.1.5.72	USA	EPI_ISL_18037610	2023-07-11
BG	XBB.1.5.72	USA	EPI_ISL_18045564	2023-07-11
BG	XBB.1.5.72	USA	EPI_ISL_18110087	2023-07-11
BG	XBB.1.5.72	USA	EPI_ISL_18057578	2023-07-11
BG	XBB.1.5.72	USA	EPI_ISL_18057110	2023-07-11
BG	XBB.1.5.72	USA	EPI_ISL_18069974	2023-07-11
BG	XBB.1.5.72	USA	EPI_ISL_18045375	2023-07-11
BG	XBB.1.5.72	Colombia	EPI_ISL_18076923	2023-07-11
BG	XBB.1.5.73	South Korea	EPI_ISL_18067797	2023-07-11
BG	XBB.1.5.76	Italy	EPI_ISL_18032175	2023-07-11
BG	XBB.1.5.76	Costa Rica	EPI_ISL_18071497	2023-07-11
BG	XBB.1.5.77	Israel	EPI_ISL_18012527	2023-07-11
BG	XBB.1.5.77	Israel	EPI_ISL_18012509	2023-07-11
BG	XBB.1.5.77	Colombia	EPI_ISL_18076942	2023-07-11
BG	XBB.1.5.77	Colombia	EPI_ISL_18076940	2023-07-11
BG	XBB.1.5.77	South Korea	EPI_ISL_18067693	2023-07-11
BG	XBB.1.5.77	South Korea	EPI_ISL_18067721	2023-07-11
BG	XBB.1.5.86	Brazil	EPI_ISL_18078900	2023-07-11
BG	XBB.1.5.89	USA	EPI_ISL_18069897	2023-07-11
BG	GK.1	USA	EPI_ISL_18055116	2023-07-12
BG	GK.2	USA	EPI_ISL_18060998	2023-07-12
BG	GN.3	Spain	EPI_ISL_18010397	2023-07-12
BG	GN.3	Spain	EPI_ISL_18118325	2023-07-12
BG	GN.3	Spain	EPI_ISL_18118333	2023-07-12
BG	HA.2	Canada	EPI_ISL_18057762	2023-07-12
BG	HA.2	USA	EPI_ISL_18040158	2023-07-12
BG	HA.2	USA	EPI_ISL_18045571	2023-07-12
BG	HD.1.1	Dominican Republic	EPI_ISL_18038432	2023-07-12
BG	HQ.1	Dominican Republic	EPI_ISL_18038398	2023-07-12
BG	HR.1	USA	EPI_ISL_18057049	2023-07-12
BG	HR.1	USA	EPI_ISL_18037632	2023-07-12
BG	HR.1	Costa Rica	EPI_ISL_18071463	2023-07-12
BG	JD.1	Brazil	EPI_ISL_18109269	2023-07-12
BG	JD.1.2	Brazil	EPI_ISL_18099817	2023-07-12
BG	XBB.1.22	USA	EPI_ISL_18057577	2023-07-12
BG	XBB.1.5	France	EPI_ISL_18076014	2023-07-12
BG	XBB.1.5	USA	EPI_ISL_18045621	2023-07-12
BG	XBB.1.5	Japan	EPI_ISL_18096980	2023-07-12
BG	XBB.1.5	USA	EPI_ISL_18110822	2023-07-12
BG	XBB.1.5	USA	EPI_ISL_18057117	2023-07-12
BG	XBB.1.5	Australia	EPI_ISL_18060319	2023-07-12
BG	XBB.1.5	South Korea	EPI_ISL_18068008	2023-07-12
BG	XBB.1.5	USA	EPI_ISL_18057047	2023-07-12
BG	XBB.1.5	USA	EPI_ISL_18057791	2023-07-12
BG	XBB.1.5	Dominican Republic	EPI_ISL_18038428	2023-07-12
BG	XBB.1.5	Dominican Republic	EPI_ISL_18058243	2023-07-12
BG	XBB.1.5	USA	EPI_ISL_18057605	2023-07-12
BG	XBB.1.5	USA	EPI_ISL_18093322	2023-07-12
BG	XBB.1.5	USA	EPI_ISL_18045654	2023-07-12
BG	XBB.1.5	USA	EPI_ISL_18081331	2023-07-12
BG	XBB.1.5	USA	EPI_ISL_18065595	2023-07-12
BG	XBB.1.5	Finland	EPI_ISL_18106442	2023-07-12
BG	XBB.1.5	USA	EPI_ISL_18053953	2023-07-12
BG	XBB.1.5	USA	EPI_ISL_18076956	2023-07-12
BG	XBB.1.5	Japan	EPI_ISL_18096983	2023-07-12
BG	XBB.1.5	Japan	EPI_ISL_18048832	2023-07-12
BG	XBB.1.5	USA	EPI_ISL_18054740	2023-07-12
BG	XBB.1.5	USA	EPI_ISL_18071353	2023-07-12
BG	XBB.1.5	Ecuador	EPI_ISL_18075519	2023-07-12
BG	XBB.1.5	Japan	EPI_ISL_18066389	2023-07-12
BG	XBB.1.5	USA	EPI_ISL_18046457	2023-07-12
BG	XBB.1.5	USA	EPI_ISL_18037652	2023-07-12
BG	XBB.1.5	USA	EPI_ISL_18105267	2023-07-12
BG	XBB.1.5	USA	EPI_ISL_18053963	2023-07-12
BG	XBB.1.5	USA	EPI_ISL_18057089	2023-07-12
BG	XBB.1.5	Japan	EPI_ISL_18065831	2023-07-12
BG	XBB.1.5	USA	EPI_ISL_18044667	2023-07-12
BG	XBB.1.5	Dominican Republic	EPI_ISL_18058242	2023-07-12
BG	XBB.1.5	USA	EPI_ISL_18054739	2023-07-12
BG	XBB.1.5	USA	EPI_ISL_18057532	2023-07-12
BG	XBB.1.5	United Kingdom	EPI_ISL_18044414	2023-07-12
BG	XBB.1.5	United Kingdom	EPI_ISL_18044405	2023-07-12
BG	XBB.1.5	Spain	EPI_ISL_18113495	2023-07-12
BG	XBB.1.5	Canary Islands	EPI_ISL_18044963	2023-07-12
BG	XBB.1.5	USA	EPI_ISL_18037626	2023-07-12
BG	XBB.1.5	Portugal	EPI_ISL_18052375	2023-07-12
BG	XBB.1.5	Canada	EPI_ISL_17996890	2023-07-12
BG	XBB.1.5	USA	EPI_ISL_18045362	2023-07-12
BG	XBB.1.5	Costa Rica	EPI_ISL_18071444	2023-07-12
BG	XBB.1.5	Guatemala	EPI_ISL_18099425	2023-07-12
BG	XBB.1.5	Israel	EPI_ISL_18012543	2023-07-12
BG	XBB.1.5	Dominican Republic	EPI_ISL_18038405	2023-07-12
BG	XBB.1.5	USA	EPI_ISL_18069960	2023-07-12
BG	XBB.1.5	USA	EPI_ISL_18069855	2023-07-12
BG	XBB.1.5	USA	EPI_ISL_18069680	2023-07-12
BG	XBB.1.5	Dominican Republic	EPI_ISL_18038401	2023-07-12
BG	XBB.1.5	USA	EPI_ISL_18053957	2023-07-12
BG	XBB.1.5	USA	EPI_ISL_18053928	2023-07-12
BG	XBB.1.5	USA	EPI_ISL_18057569	2023-07-12
BG	XBB.1.5	USA	EPI_ISL_18057597	2023-07-12
BG	XBB.1.5	USA	EPI_ISL_18057155	2023-07-12
BG	XBB.1.5	USA	EPI_ISL_18057055	2023-07-12
BG	XBB.1.5	USA	EPI_ISL_18057580	2023-07-12
BG	XBB.1.5	USA	EPI_ISL_18082209	2023-07-12
BG	XBB.1.5	USA	EPI_ISL_18082208	2023-07-12
BG	XBB.1.5	Italy	EPI_ISL_18012392	2023-07-12
BG	XBB.1.5	USA	EPI_ISL_18057102	2023-07-12
BG	XBB.1.5	Costa Rica	EPI_ISL_18071465	2023-07-12
BG	XBB.1.5.105	United Kingdom	EPI_ISL_18044426	2023-07-12
BG	XBB.1.5.105	USA	EPI_ISL_18110744	2023-07-12
BG	XBB.1.5.72	Colombia	EPI_ISL_18071856	2023-07-12
BG	XBB.1.5.72	USA	EPI_ISL_18077006	2023-07-12
BG	XBB.1.5.72	Italy	EPI_ISL_18032176	2023-07-12
BG	XBB.1.5.72	Spain	EPI_ISL_18008619	2023-07-12
BG	XBB.1.5.72	USA	EPI_ISL_18053921	2023-07-12
BG	XBB.1.5.72	USA	EPI_ISL_18057170	2023-07-12
BG	XBB.1.5.72	USA	EPI_ISL_18080646	2023-07-12
BG	XBB.1.5.72	USA	EPI_ISL_18057025	2023-07-12
BG	XBB.1.5.72	USA	EPI_ISL_18057085	2023-07-12
BG	XBB.1.5.72	United Kingdom	EPI_ISL_18052768	2023-07-12
BG	XBB.1.5.73	South Korea	EPI_ISL_18067833	2023-07-12
BG	XBB.1.5.73	Canada	EPI_ISL_17994109	2023-07-12
BG	XBB.1.5.73	Canada	EPI_ISL_17994108	2023-07-12
BG	XBB.1.5.77	Colombia	EPI_ISL_18076946	2023-07-12
BG	XBB.1.5.77	Italy	EPI_ISL_18019245	2023-07-12
BG	XBB.1.5.77	USA	EPI_ISL_18055496	2023-07-12
BG	XBB.1.5.77	USA	EPI_ISL_18028438	2023-07-12
BG	XBB.1.5.77	Costa Rica	EPI_ISL_18071462	2023-07-12
BG	XBB.1.5.86	Portugal	EPI_ISL_18052310	2023-07-12
BG	XBB.1.5.90	Japan	EPI_ISL_18097793	2023-07-12
BG	XBB.1.5.92	Ecuador	EPI_ISL_18075517	2023-07-12
BG	XBB.1.5.95	USA	EPI_ISL_18040155	2023-07-12
BG	XBB.1.5.97	Australia	EPI_ISL_17999436	2023-07-12
BG	XBB.1.5.97	Australia	EPI_ISL_18067974	2023-07-12
BG	GN.4	USA	EPI_ISL_18057098	2023-07-13
BG	HD.1.1	Dominican Republic	EPI_ISL_18038406	2023-07-13
BG	JD.1	Brazil	EPI_ISL_18113550	2023-07-13
BG	JD.1.2	Brazil	EPI_ISL_18109268	2023-07-13
BG	XBB.1.5	USA	EPI_ISL_18022457	2023-07-13
BG	XBB.1.5	USA	EPI_ISL_18090045	2023-07-13
BG	XBB.1.5	USA	EPI_ISL_18022452	2023-07-13
BG	XBB.1.5	USA	EPI_ISL_18058208	2023-07-13
BG	XBB.1.5	Spain	EPI_ISL_18118226	2023-07-13
BG	XBB.1.5	Sweden	EPI_ISL_17990592	2023-07-13
BG	XBB.1.5	USA	EPI_ISL_18081596	2023-07-13
BG	XBB.1.5	Japan	EPI_ISL_18058402	2023-07-13
BG	XBB.1.5	USA	EPI_ISL_18037660	2023-07-13
BG	XBB.1.5	Canada	EPI_ISL_18055144	2023-07-13
BG	XBB.1.5	Costa Rica	EPI_ISL_18071464	2023-07-13
BG	XBB.1.5	USA	EPI_ISL_18053969	2023-07-13
BG	XBB.1.5	Japan	EPI_ISL_18051982	2023-07-13
BG	XBB.1.5	Japan	EPI_ISL_18051975	2023-07-13
BG	XBB.1.5	USA	EPI_ISL_18057817	2023-07-13
BG	XBB.1.5	Canada	EPI_ISL_18055143	2023-07-13
BG	XBB.1.5	USA	EPI_ISL_18046471	2023-07-13
BG	XBB.1.5	USA	EPI_ISL_18046467	2023-07-13
BG	XBB.1.5	USA	EPI_ISL_18069678	2023-07-13
BG	XBB.1.5	USA	EPI_ISL_18053972	2023-07-13
BG	XBB.1.5	Spain	EPI_ISL_18059174	2023-07-13
BG	XBB.1.5	Costa Rica	EPI_ISL_18071454	2023-07-13
BG	XBB.1.5	USA	EPI_ISL_18057099	2023-07-13
BG	XBB.1.5	United Kingdom	EPI_ISL_18052263	2023-07-13
BG	XBB.1.5	USA	EPI_ISL_18057818	2023-07-13
BG	XBB.1.5	USA	EPI_ISL_18055499	2023-07-13
BG	XBB.1.5	Netherlands	EPI_ISL_18056911	2023-07-13
BG	XBB.1.5	United Kingdom	EPI_ISL_18056731	2023-07-13
BG	XBB.1.5	Japan	EPI_ISL_18058398	2023-07-13
BG	XBB.1.5	USA	EPI_ISL_18044670	2023-07-13
BG	XBB.1.5	USA	EPI_ISL_18057807	2023-07-13
BG	XBB.1.5	Italy	EPI_ISL_18032342	2023-07-13
BG	XBB.1.5	Colombia	EPI_ISL_18076899	2023-07-13
BG	XBB.1.5	USA	EPI_ISL_18107821	2023-07-13
BG	XBB.1.5	Japan	EPI_ISL_18065845	2023-07-13
BG	XBB.1.5	Japan	EPI_ISL_18041497	2023-07-13
BG	XBB.1.5	Canada	EPI_ISL_18059715	2023-07-13
BG	XBB.1.5	USA	EPI_ISL_18053970	2023-07-13
BG	XBB.1.5	USA	EPI_ISL_18053988	2023-07-13
BG	XBB.1.5	Costa Rica	EPI_ISL_18071445	2023-07-13
BG	XBB.1.5.10	USA	EPI_ISL_18037676	2023-07-13
BG	XBB.1.5.104	Spain	EPI_ISL_18008616	2023-07-13
BG	XBB.1.5.104	USA	EPI_ISL_18054073	2023-07-13
BG	XBB.1.5.72	Colombia	EPI_ISL_18076924	2023-07-13
BG	XBB.1.5.72	Sweden	EPI_ISL_17990586	2023-07-13
BG	XBB.1.5.72	USA	EPI_ISL_18069890	2023-07-13
BG	XBB.1.5.72	Colombia	EPI_ISL_18076916	2023-07-13
BG	XBB.1.5.72	Spain	EPI_ISL_18118299	2023-07-13
BG	XBB.1.5.72	Colombia	EPI_ISL_18076906	2023-07-13
BG	XBB.1.5.72	USA	EPI_ISL_18053982	2023-07-13
BG	XBB.1.5.72	USA	EPI_ISL_18022450	2023-07-13
BG	XBB.1.5.72	USA	EPI_ISL_18057576	2023-07-13
BG	XBB.1.5.72	USA	EPI_ISL_18069758	2023-07-13
BG	XBB.1.5.72	Netherlands	EPI_ISL_18033021	2023-07-13
BG	XBB.1.5.77	Colombia	EPI_ISL_18076935	2023-07-13
BG	XBB.1.5.77	Colombia	EPI_ISL_18076950	2023-07-13
BG	XBB.1.5.77	Colombia	EPI_ISL_18076949	2023-07-13
BG	XBB.1.5.77	USA	EPI_ISL_18071362	2023-07-13
BG	XBB.1.5.77	Colombia	EPI_ISL_18071789	2023-07-13
BG	XBB.1.5.77	Colombia	EPI_ISL_18076943	2023-07-13
BG	XBB.1.5.77	Colombia	EPI_ISL_18076945	2023-07-13
BG	XBB.1.5.77	Colombia	EPI_ISL_18071823	2023-07-13
BG	XBB.1.5.77	USA	EPI_ISL_18022455	2023-07-13
BG	XBB.1.5.91	Japan	EPI_ISL_18065225	2023-07-13
BG	XBB.1.5.92	Canada	EPI_ISL_18030515	2023-07-13
BG	XBB.1.5.95	USA	EPI_ISL_18057601	2023-07-13
BG	XBB.1.9.1	USA	EPI_ISL_18057109	2023-07-13
BG	GN.4	United Kingdom	EPI_ISL_18066855	2023-07-14
BG	HA.1	Canada	EPI_ISL_18076443	2023-07-14
BG	XBB.1	USA	EPI_ISL_18069746	2023-07-14
BG	XBB.1.5	USA	EPI_ISL_18077330	2023-07-14
BG	XBB.1.5	USA	EPI_ISL_18057161	2023-07-14
BG	XBB.1.5	Japan	EPI_ISL_18096991	2023-07-14
BG	XBB.1.5	USA	EPI_ISL_18055515	2023-07-14
BG	XBB.1.5	USA	EPI_ISL_18057594	2023-07-14
BG	XBB.1.5	Japan	EPI_ISL_18052000	2023-07-14
BG	XBB.1.5	South Korea	EPI_ISL_18068080	2023-07-14
BG	XBB.1.5	Costa Rica	EPI_ISL_18071453	2023-07-14
BG	XBB.1.5	USA	EPI_ISL_18076968	2023-07-14
BG	XBB.1.5	South Korea	EPI_ISL_18068092	2023-07-14
BG	XBB.1.5	Costa Rica	EPI_ISL_18071468	2023-07-14
BG	XBB.1.5	Japan	EPI_ISL_18096993	2023-07-14
BG	XBB.1.5	Japan	EPI_ISL_18050941	2023-07-14
BG	XBB.1.5	New Zealand	EPI_ISL_18047864	2023-07-14
BG	XBB.1.5	South Korea	EPI_ISL_18068160	2023-07-14
BG	XBB.1.5	Australia	EPI_ISL_18060338	2023-07-14
BG	XBB.1.5	USA	EPI_ISL_18069841	2023-07-14
BG	XBB.1.5	Costa Rica	EPI_ISL_18071476	2023-07-14
BG	XBB.1.5	USA	EPI_ISL_18049950	2023-07-14
BG	XBB.1.5	USA	EPI_ISL_18049951	2023-07-14
BG	XBB.1.5	Colombia	EPI_ISL_18071857	2023-07-14
BG	XBB.1.5	Japan	EPI_ISL_18051999	2023-07-14
BG	XBB.1.5	USA	EPI_ISL_18043555	2023-07-14
BG	XBB.1.5	USA	EPI_ISL_18055518	2023-07-14
BG	XBB.1.5	United Kingdom	EPI_ISL_18052534	2023-07-14
BG	XBB.1.5	Canada	EPI_ISL_18030527	2023-07-14
BG	XBB.1.5	Cabo Verde	EPI_ISL_18059197	2023-07-14
BG	XBB.1.5	Guatemala	EPI_ISL_18099405	2023-07-14
BG	XBB.1.5	Dominican Republic	EPI_ISL_18038425	2023-07-14
BG	XBB.1.5	USA	EPI_ISL_18057822	2023-07-14
BG	XBB.1.5	Guatemala	EPI_ISL_18099412	2023-07-14
BG	XBB.1.5	USA	EPI_ISL_18060992	2023-07-14
BG	XBB.1.5	Sweden	EPI_ISL_18041917	2023-07-14
BG	XBB.1.5	Ecuador	EPI_ISL_18075516	2023-07-14
BG	XBB.1.5	USA	EPI_ISL_18057672	2023-07-14
BG	XBB.1.5	Australia	EPI_ISL_18073796	2023-07-14
BG	XBB.1.5	USA	EPI_ISL_18069634	2023-07-14
BG	XBB.1.5	USA	EPI_ISL_18057041	2023-07-14
BG	XBB.1.5.104	USA	EPI_ISL_18040072	2023-07-14
BG	XBB.1.5.72	USA	EPI_ISL_18037694	2023-07-14
BG	XBB.1.5.72	Costa Rica	EPI_ISL_18071467	2023-07-14
BG	XBB.1.5.72	Colombia	EPI_ISL_18071809	2023-07-14
BG	XBB.1.5.72	USA	EPI_ISL_18114471	2023-07-14
BG	XBB.1.5.72	USA	EPI_ISL_18114474	2023-07-14
BG	XBB.1.5.72	USA	EPI_ISL_18107473	2023-07-14
BG	XBB.1.5.72	USA	EPI_ISL_18069726	2023-07-14
BG	XBB.1.5.72	USA	EPI_ISL_18060993	2023-07-14
BG	XBB.1.5.72	USA	EPI_ISL_18061008	2023-07-14
BG	XBB.1.5.73	South Korea	EPI_ISL_18116392	2023-07-14
BG	XBB.1.5.77	USA	EPI_ISL_18069795	2023-07-14
BG	XBB.1.5.77	Colombia	EPI_ISL_18076951	2023-07-14
BG	XBB.1.5.77	Colombia	EPI_ISL_18076947	2023-07-14
BG	XBB.1.5.78	Ireland	EPI_ISL_18076209	2023-07-14
BG	XBB.1.5.90	Japan	EPI_ISL_18060516	2023-07-14
BG	GK.1.1	USA	EPI_ISL_18077334	2023-07-15
BG	GN.4	Italy	EPI_ISL_18071903	2023-07-15
BG	HA.1	USA	EPI_ISL_18081465	2023-07-15
BG	HA.1	Canary Islands	EPI_ISL_18096895	2023-07-15
BG	HA.2	United Kingdom	EPI_ISL_18056763	2023-07-15
BG	HD.1.1	USA	EPI_ISL_18082036	2023-07-15
BG	HR.1	Australia	EPI_ISL_18060341	2023-07-15
BG	HR.1	USA	EPI_ISL_18069941	2023-07-15
BG	JD.1.1	Spain	EPI_ISL_18033321	2023-07-15
BG	JD.1.2	Brazil	EPI_ISL_18109270	2023-07-15
BG	JD.2	USA	EPI_ISL_18057851	2023-07-15
BG	XBB.1.33	Italy	EPI_ISL_18007846	2023-07-15
BG	XBB.1.5	USA	EPI_ISL_18057572	2023-07-15
BG	XBB.1.5	USA	EPI_ISL_18057106	2023-07-15
BG	XBB.1.5	USA	EPI_ISL_18040142	2023-07-15
BG	XBB.1.5	USA	EPI_ISL_18060644	2023-07-15
BG	XBB.1.5	Italy	EPI_ISL_18007845	2023-07-15
BG	XBB.1.5	Italy	EPI_ISL_18007827	2023-07-15
BG	XBB.1.5	Japan	EPI_ISL_18050926	2023-07-15
BG	XBB.1.5	United Kingdom	EPI_ISL_18052592	2023-07-15
BG	XBB.1.5	USA	EPI_ISL_18060636	2023-07-15
BG	XBB.1.5	Canada	EPI_ISL_18030520	2023-07-15
BG	XBB.1.5	Thailand	EPI_ISL_18064531	2023-07-15
BG	XBB.1.5	South Korea	EPI_ISL_18068165	2023-07-15
BG	XBB.1.5	USA	EPI_ISL_18105271	2023-07-15
BG	XBB.1.5	USA	EPI_ISL_18081533	2023-07-15
BG	XBB.1.5	Canada	EPI_ISL_18038292	2023-07-15
BG	XBB.1.5	USA	EPI_ISL_18060634	2023-07-15
BG	XBB.1.5	Costa Rica	EPI_ISL_18071452	2023-07-15
BG	XBB.1.5	United Kingdom	EPI_ISL_18052535	2023-07-15
BG	XBB.1.5	United Kingdom	EPI_ISL_18052527	2023-07-15
BG	XBB.1.5	United Kingdom	EPI_ISL_18052489	2023-07-15
BG	XBB.1.5	United Kingdom	EPI_ISL_18106646	2023-07-15
BG	XBB.1.5	Sweden	EPI_ISL_18075028	2023-07-15
BG	XBB.1.5	USA	EPI_ISL_18054018	2023-07-15
BG	XBB.1.5	USA	EPI_ISL_18057619	2023-07-15
BG	XBB.1.5	Italy	EPI_ISL_18007850	2023-07-15
BG	XBB.1.5	USA	EPI_ISL_18108150	2023-07-15
BG	XBB.1.5.100	USA	EPI_ISL_18060584	2023-07-15
BG	XBB.1.5.106	USA	EPI_ISL_18036916	2023-07-15
BG	XBB.1.5.106	USA	EPI_ISL_18057568	2023-07-15
BG	XBB.1.5.72	Canada	EPI_ISL_18058024	2023-07-15
BG	XBB.1.5.72	USA	EPI_ISL_18114451	2023-07-15
BG	XBB.1.5.72	USA	EPI_ISL_18081424	2023-07-15
BG	XBB.1.5.72	USA	EPI_ISL_18037706	2023-07-15
BG	XBB.1.5.72	USA	EPI_ISL_18114480	2023-07-15
BG	XBB.1.5.72	USA	EPI_ISL_18114481	2023-07-15
BG	XBB.1.5.72	Canada	EPI_ISL_18030488	2023-07-15
BG	XBB.1.5.72	United Kingdom	EPI_ISL_18056724	2023-07-15
BG	XBB.1.5.72	USA	EPI_ISL_18057673	2023-07-15
BG	XBB.1.5.72	USA	EPI_ISL_18054017	2023-07-15
BG	XBB.1.5.72	Colombia	EPI_ISL_18071831	2023-07-15
BG	XBB.1.5.73	USA	EPI_ISL_18057552	2023-07-15
BG	XBB.1.5.73	Canada	EPI_ISL_18030564	2023-07-15
BG	XBB.1.5.73	Canada	EPI_ISL_18030482	2023-07-15
BG	XBB.1.5.77	Colombia	EPI_ISL_18076934	2023-07-15
BG	XBB.1.5.77	Colombia	EPI_ISL_18076892	2023-07-15
BG	XBB.1.5.86	Italy	EPI_ISL_18007830	2023-07-15
BG	XBB.1.5.86	Ireland	EPI_ISL_18042358	2023-07-15
BG	XBB.1.5.88	China	EPI_ISL_18074352	2023-07-15
BG	XBB.1.5.89	Italy	EPI_ISL_18071906	2023-07-15
BG	XBB.1.5.89	South Africa	EPI_ISL_18113556	2023-07-15
BG	XBB.1.5.98	USA	EPI_ISL_18012829	2023-07-15
BG	HQ.1	USA	EPI_ISL_18059526	2023-07-16
BG	HR.1	Costa Rica	EPI_ISL_18071471	2023-07-16
BG	HR.1	USA	EPI_ISL_18057156	2023-07-16
BG	XBB.1.22	USA	EPI_ISL_18057079	2023-07-16
BG	XBB.1.5	United Kingdom	EPI_ISL_18056744	2023-07-16
BG	XBB.1.5	USA	EPI_ISL_18072431	2023-07-16
BG	XBB.1.5	Japan	EPI_ISL_18060302	2023-07-16
BG	XBB.1.5	USA	EPI_ISL_18093562	2023-07-16
BG	XBB.1.5	South Korea	EPI_ISL_18068445	2023-07-16
BG	XBB.1.5	South Korea	EPI_ISL_18067903	2023-07-16
BG	XBB.1.5	USA	EPI_ISL_18055533	2023-07-16
BG	XBB.1.5	Costa Rica	EPI_ISL_18071448	2023-07-16
BG	XBB.1.5	USA	EPI_ISL_18114461	2023-07-16
BG	XBB.1.5	South Korea	EPI_ISL_18068391	2023-07-16
BG	XBB.1.5	South Korea	EPI_ISL_18068392	2023-07-16
BG	XBB.1.5	Portugal	EPI_ISL_18052383	2023-07-16
BG	XBB.1.5	USA	EPI_ISL_18069877	2023-07-16
BG	XBB.1.5	USA	EPI_ISL_18033514	2023-07-16
BG	XBB.1.5	Canada	EPI_ISL_18055186	2023-07-16
BG	XBB.1.5	United Kingdom	EPI_ISL_18066818	2023-07-16
BG	XBB.1.5	USA	EPI_ISL_18070005	2023-07-16
BG	XBB.1.5	USA	EPI_ISL_18040064	2023-07-16
BG	XBB.1.5	USA	EPI_ISL_18043552	2023-07-16
BG	XBB.1.5	USA	EPI_ISL_18081527	2023-07-16
BG	XBB.1.5	USA	EPI_ISL_18060586	2023-07-16
BG	XBB.1.5	USA	EPI_ISL_18069606	2023-07-16
BG	XBB.1.5	USA	EPI_ISL_18081570	2023-07-16
BG	XBB.1.5	Canada	EPI_ISL_18030510	2023-07-16
BG	XBB.1.5	Canada	EPI_ISL_18073946	2023-07-16
BG	XBB.1.5	France	EPI_ISL_18070098	2023-07-16
BG	XBB.1.5.104	USA	EPI_ISL_18114489	2023-07-16
BG	XBB.1.5.104	USA	EPI_ISL_18081432	2023-07-16
BG	XBB.1.5.72	USA	EPI_ISL_18060962	2023-07-16
BG	XBB.1.5.72	South Korea	EPI_ISL_18068360	2023-07-16
BG	XBB.1.5.72	Colombia	EPI_ISL_18076917	2023-07-16
BG	XBB.1.5.72	Canada	EPI_ISL_18062493	2023-07-16
BG	XBB.1.5.77	Canada	EPI_ISL_18074019	2023-07-16
BG	XBB.1.5.77	Colombia	EPI_ISL_18071791	2023-07-16
BG	XBB.1.5.77	South Korea	EPI_ISL_18068436	2023-07-16
BG	XBB.1.5.89	Canary Islands	EPI_ISL_18096900	2023-07-16
BG	XBB.1.5.91	United Kingdom	EPI_ISL_18072116	2023-07-16
BG	XBB.1.9.1	USA	EPI_ISL_18057539	2023-07-16
BG	GK.1	USA	EPI_ISL_18055127	2023-07-17
BG	GN.4	United Kingdom	EPI_ISL_18052631	2023-07-17
BG	GN.4	USA	EPI_ISL_18105269	2023-07-17
BG	HA.1	Canada	EPI_ISL_18074002	2023-07-17
BG	HA.1	USA	EPI_ISL_18072484	2023-07-17
BG	HA.2	France	EPI_ISL_18049113	2023-07-17
BG	HA.2	USA	EPI_ISL_18057077	2023-07-17
BG	HR.1	Costa Rica	EPI_ISL_18071473	2023-07-17
BG	HR.1	USA	EPI_ISL_18072517	2023-07-17
BG	JD.1.1	France	EPI_ISL_18070073	2023-07-17
BG	JD.1.1	Spain	EPI_ISL_18033322	2023-07-17
BG	XBB.1.33	Italy	EPI_ISL_18015535	2023-07-17
BG	XBB.1.5	USA	EPI_ISL_18095729	2023-07-17
BG	XBB.1.5	USA	EPI_ISL_18064678	2023-07-17
BG	XBB.1.5	United Kingdom	EPI_ISL_18056751	2023-07-17
BG	XBB.1.5	Canada	EPI_ISL_18049244	2023-07-17
BG	XBB.1.5	Canada	EPI_ISL_18079075	2023-07-17
BG	XBB.1.5	United Kingdom	EPI_ISL_18072020	2023-07-17
BG	XBB.1.5	USA	EPI_ISL_18069694	2023-07-17
BG	XBB.1.5	USA	EPI_ISL_18095478	2023-07-17
BG	XBB.1.5	USA	EPI_ISL_18046452	2023-07-17
BG	XBB.1.5	Canada	EPI_ISL_18038294	2023-07-17
BG	XBB.1.5	France	EPI_ISL_18070074	2023-07-17
BG	XBB.1.5	United Kingdom	EPI_ISL_18052639	2023-07-17
BG	XBB.1.5	Guatemala	EPI_ISL_18099387	2023-07-17
BG	XBB.1.5	USA	EPI_ISL_18072469	2023-07-17
BG	XBB.1.5	France	EPI_ISL_18109718	2023-07-17
BG	XBB.1.5	South Korea	EPI_ISL_18116558	2023-07-17
BG	XBB.1.5	USA	EPI_ISL_18072497	2023-07-17
BG	XBB.1.5	USA	EPI_ISL_18037713	2023-07-17
BG	XBB.1.5	Japan	EPI_ISL_18082343	2023-07-17
BG	XBB.1.5	Japan	EPI_ISL_18066329	2023-07-17
BG	XBB.1.5	USA	EPI_ISL_18053764	2023-07-17
BG	XBB.1.5	South Korea	EPI_ISL_18116590	2023-07-17
BG	XBB.1.5	USA	EPI_ISL_18057911	2023-07-17
BG	XBB.1.5	Guatemala	EPI_ISL_18099392	2023-07-17
BG	XBB.1.5	USA	EPI_ISL_18073896	2023-07-17
BG	XBB.1.5	Canada	EPI_ISL_18030566	2023-07-17
BG	XBB.1.5	USA	EPI_ISL_18077363	2023-07-17
BG	XBB.1.5	USA	EPI_ISL_18070021	2023-07-17
BG	XBB.1.5	Canada	EPI_ISL_18038293	2023-07-17
BG	XBB.1.5	USA	EPI_ISL_18058178	2023-07-17
BG	XBB.1.5	USA	EPI_ISL_18114492	2023-07-17
BG	XBB.1.5	United Kingdom	EPI_ISL_18066819	2023-07-17
BG	XBB.1.5	USA	EPI_ISL_18060667	2023-07-17
BG	XBB.1.5	USA	EPI_ISL_18072518	2023-07-17
BG	XBB.1.5	USA	EPI_ISL_18072494	2023-07-17
BG	XBB.1.5	Costa Rica	EPI_ISL_18071477	2023-07-17
BG	XBB.1.5	France	EPI_ISL_18049009	2023-07-17
BG	XBB.1.5	USA	EPI_ISL_18069952	2023-07-17
BG	XBB.1.5	Japan	EPI_ISL_18081817	2023-07-17
BG	XBB.1.5	Canada	EPI_ISL_18074013	2023-07-17
BG	XBB.1.5	USA	EPI_ISL_18046474	2023-07-17
BG	XBB.1.5	Canada	EPI_ISL_18059698	2023-07-17
BG	XBB.1.5	USA	EPI_ISL_18057100	2023-07-17
BG	XBB.1.5	USA	EPI_ISL_18069597	2023-07-17
BG	XBB.1.5	USA	EPI_ISL_18069962	2023-07-17
BG	XBB.1.5	France	EPI_ISL_18070065	2023-07-17
BG	XBB.1.5	Denmark	EPI_ISL_18052061	2023-07-17
BG	XBB.1.5	USA	EPI_ISL_18065358	2023-07-17
BG	XBB.1.5	United Kingdom	EPI_ISL_18066902	2023-07-17
BG	XBB.1.5	South Korea	EPI_ISL_18116696	2023-07-17
BG	XBB.1.5	Spain	EPI_ISL_18112444	2023-07-17
BG	XBB.1.5	France	EPI_ISL_18075973	2023-07-17
BG	XBB.1.5	Puerto Rico	EPI_ISL_18107224	2023-07-17
BG	XBB.1.5	USA	EPI_ISL_18111434	2023-07-17
BG	XBB.1.5	USA	EPI_ISL_18057874	2023-07-17
BG	XBB.1.5	USA	EPI_ISL_18057907	2023-07-17
BG	XBB.1.5	USA	EPI_ISL_18057280	2023-07-17
BG	XBB.1.5.104	USA	EPI_ISL_18072530	2023-07-17
BG	XBB.1.5.105	Denmark	EPI_ISL_18071886	2023-07-17
BG	XBB.1.5.40	USA	EPI_ISL_18069673	2023-07-17
BG	XBB.1.5.6	France	EPI_ISL_18070072	2023-07-17
BG	XBB.1.5.72	Canada	EPI_ISL_18055244	2023-07-17
BG	XBB.1.5.72	USA	EPI_ISL_18072510	2023-07-17
BG	XBB.1.5.72	Canada	EPI_ISL_18074027	2023-07-17
BG	XBB.1.5.72	Canada	EPI_ISL_18073997	2023-07-17
BG	XBB.1.5.72	Colombia	EPI_ISL_18076919	2023-07-17
BG	XBB.1.5.72	Ecuador	EPI_ISL_18075763	2023-07-17
BG	XBB.1.5.72	Ecuador	EPI_ISL_18075764	2023-07-17
BG	XBB.1.5.72	USA	EPI_ISL_18057329	2023-07-17
BG	XBB.1.5.72	USA	EPI_ISL_18072539	2023-07-17
BG	XBB.1.5.72	USA	EPI_ISL_18072525	2023-07-17
BG	XBB.1.5.72	USA	EPI_ISL_18071369	2023-07-17
BG	XBB.1.5.72	USA	EPI_ISL_18069633	2023-07-17
BG	XBB.1.5.72	Canada	EPI_ISL_18038305	2023-07-17
BG	XBB.1.5.72	Canada	EPI_ISL_18073971	2023-07-17
BG	XBB.1.5.72	Canada	EPI_ISL_18055179	2023-07-17
BG	XBB.1.5.72	USA	EPI_ISL_18065598	2023-07-17
BG	XBB.1.5.72	USA	EPI_ISL_18057096	2023-07-17
BG	XBB.1.5.72	Colombia	EPI_ISL_18071817	2023-07-17
BG	XBB.1.5.72	Canada	EPI_ISL_18030590	2023-07-17
BG	XBB.1.5.72	Canada	EPI_ISL_18055194	2023-07-17
BG	XBB.1.5.72	Panama	EPI_ISL_18100053	2023-07-17
BG	XBB.1.5.72	France	EPI_ISL_18049112	2023-07-17
BG	XBB.1.5.77	France	EPI_ISL_18075987	2023-07-17
BG	XBB.1.5.77	France	EPI_ISL_18075989	2023-07-17
BG	XBB.1.5.77	USA	EPI_ISL_18037717	2023-07-17
BG	XBB.1.5.78	Guatemala	EPI_ISL_18099401	2023-07-17
BG	XBB.1.5.92	Canada	EPI_ISL_18055165	2023-07-17
BG	HQ.1	Guatemala	EPI_ISL_18099402	2023-07-18
BG	HR.1	Costa Rica	EPI_ISL_18110150	2023-07-18
BG	XBB.1.5	USA	EPI_ISL_18072564	2023-07-18
BG	XBB.1.5	France	EPI_ISL_18076019	2023-07-18
BG	XBB.1.5	Japan	EPI_ISL_18051825	2023-07-18
BG	XBB.1.5	USA	EPI_ISL_18072618	2023-07-18
BG	XBB.1.5	South Korea	EPI_ISL_18116789	2023-07-18
BG	XBB.1.5	Canada	EPI_ISL_18055192	2023-07-18
BG	XBB.1.5	Thailand	EPI_ISL_18042071	2023-07-18
BG	XBB.1.5	Canada	EPI_ISL_18038316	2023-07-18
BG	XBB.1.5	South Korea	EPI_ISL_18116758	2023-07-18
BG	XBB.1.5	USA	EPI_ISL_18057045	2023-07-18
BG	XBB.1.5	Canada	EPI_ISL_18038311	2023-07-18
BG	XBB.1.5	Mexico	EPI_ISL_18103773	2023-07-18
BG	XBB.1.5	Mexico	EPI_ISL_18103774	2023-07-18
BG	XBB.1.5	Canada	EPI_ISL_18079076	2023-07-18
BG	XBB.1.5	Finland	EPI_ISL_18106425	2023-07-18
BG	XBB.1.5	Japan	EPI_ISL_18081847	2023-07-18
BG	XBB.1.5	Japan	EPI_ISL_18051822	2023-07-18
BG	XBB.1.5	South Korea	EPI_ISL_18116821	2023-07-18
BG	XBB.1.5	USA	EPI_ISL_18072427	2023-07-18
BG	XBB.1.5	South Korea	EPI_ISL_18116885	2023-07-18
BG	XBB.1.5	Spain	EPI_ISL_18079029	2023-07-18
BG	XBB.1.5	Taiwan	EPI_ISL_18067341	2023-07-18
BG	XBB.1.5	USA	EPI_ISL_18059499	2023-07-18
BG	XBB.1.5	Iceland	EPI_ISL_18044182	2023-07-18
BG	XBB.1.5	USA	EPI_ISL_18059600	2023-07-18
BG	XBB.1.5	Costa Rica	EPI_ISL_18071451	2023-07-18
BG	XBB.1.5	Costa Rica	EPI_ISL_18110156	2023-07-18
BG	XBB.1.5	USA	EPI_ISL_18057065	2023-07-18
BG	XBB.1.5	USA	EPI_ISL_18057913	2023-07-18
BG	XBB.1.5	USA	EPI_ISL_18072842	2023-07-18
BG	XBB.1.5	USA	EPI_ISL_18072594	2023-07-18
BG	XBB.1.5	USA	EPI_ISL_18076987	2023-07-18
BG	XBB.1.5	USA	EPI_ISL_18076989	2023-07-18
BG	XBB.1.5	Japan	EPI_ISL_18097387	2023-07-18
BG	XBB.1.5	Japan	EPI_ISL_18097381	2023-07-18
BG	XBB.1.5	Thailand	EPI_ISL_18064541	2023-07-18
BG	XBB.1.5	Dominican Republic	EPI_ISL_18058245	2023-07-18
BG	XBB.1.5	USA	EPI_ISL_18072643	2023-07-18
BG	XBB.1.5	Japan	EPI_ISL_18071737	2023-07-18
BG	XBB.1.5	USA	EPI_ISL_18059603	2023-07-18
BG	XBB.1.5	USA	EPI_ISL_18059609	2023-07-18
BG	XBB.1.5	USA	EPI_ISL_18072639	2023-07-18
BG	XBB.1.5	USA	EPI_ISL_18072607	2023-07-18
BG	XBB.1.5	United Kingdom	EPI_ISL_18098233	2023-07-18
BG	XBB.1.5	USA	EPI_ISL_18072601	2023-07-18
BG	XBB.1.5	Costa Rica	EPI_ISL_18071474	2023-07-18
BG	XBB.1.5	USA	EPI_ISL_18111437	2023-07-18
BG	XBB.1.5	USA	EPI_ISL_18059516	2023-07-18
BG	XBB.1.5	USA	EPI_ISL_18057070	2023-07-18
BG	XBB.1.5	Australia	EPI_ISL_18060418	2023-07-18
BG	XBB.1.5	USA	EPI_ISL_18069924	2023-07-18
BG	XBB.1.5.100	USA	EPI_ISL_18113986	2023-07-18
BG	XBB.1.5.103	USA	EPI_ISL_18057918	2023-07-18
BG	XBB.1.5.104	Spain	EPI_ISL_18044141	2023-07-18
BG	XBB.1.5.72	Colombia	EPI_ISL_18071827	2023-07-18
BG	XBB.1.5.72	USA	EPI_ISL_18057020	2023-07-18
BG	XBB.1.5.72	USA	EPI_ISL_18069623	2023-07-18
BG	XBB.1.5.72	USA	EPI_ISL_18072624	2023-07-18
BG	XBB.1.5.72	USA	EPI_ISL_18077419	2023-07-18
BG	XBB.1.5.72	USA	EPI_ISL_18060693	2023-07-18
BG	XBB.1.5.72	USA	EPI_ISL_18069754	2023-07-18
BG	XBB.1.5.72	Spain	EPI_ISL_18072758	2023-07-18
BG	XBB.1.5.73	Costa Rica	EPI_ISL_18110157	2023-07-18
BG	XBB.1.5.73	Canada	EPI_ISL_18030581	2023-07-18
BG	XBB.1.5.73	USA	EPI_ISL_18069970	2023-07-18
BG	XBB.1.5.75	USA	EPI_ISL_18049227	2023-07-18
BG	XBB.1.5.77	Canada	EPI_ISL_18030589	2023-07-18
BG	XBB.1.5.77	USA	EPI_ISL_18114164	2023-07-18
BG	XBB.1.5.86	Brazil	EPI_ISL_18078908	2023-07-18
BG	XBB.1.5.94	Canary Islands	EPI_ISL_18106991	2023-07-18
BG	XBB.1.5.96	Australia	EPI_ISL_18048616	2023-07-18
BG	XBB.1.5.98	United Kingdom	EPI_ISL_18078375	2023-07-18
BG	BA.2	Spain	EPI_ISL_18112393	2023-07-19
BG	HA.2	USA	EPI_ISL_18058195	2023-07-19
BG	HD.1	Dominican Republic	EPI_ISL_18058264	2023-07-19
BG	HR.1	USA	EPI_ISL_18069806	2023-07-19
BG	JD.1.2	Brazil	EPI_ISL_18109271	2023-07-19
BG	XBB.1.5	Sweden	EPI_ISL_18067353	2023-07-19
BG	XBB.1.5	Sweden	EPI_ISL_18067355	2023-07-19
BG	XBB.1.5	Costa Rica	EPI_ISL_18110147	2023-07-19
BG	XBB.1.5	USA	EPI_ISL_18115442	2023-07-19
BG	XBB.1.5	South Korea	EPI_ISL_18116898	2023-07-19
BG	XBB.1.5	Puerto Rico	EPI_ISL_18107300	2023-07-19
BG	XBB.1.5	Japan	EPI_ISL_18111816	2023-07-19
BG	XBB.1.5	Guatemala	EPI_ISL_18099386	2023-07-19
BG	XBB.1.5	USA	EPI_ISL_18059622	2023-07-19
BG	XBB.1.5	USA	EPI_ISL_18057316	2023-07-19
BG	XBB.1.5	Costa Rica	EPI_ISL_18110138	2023-07-19
BG	XBB.1.5	USA	EPI_ISL_18059612	2023-07-19
BG	XBB.1.5	USA	EPI_ISL_18053048	2023-07-19
BG	XBB.1.5	Japan	EPI_ISL_18100672	2023-07-19
BG	XBB.1.5	USA	EPI_ISL_18095732	2023-07-19
BG	XBB.1.5	USA	EPI_ISL_18057328	2023-07-19
BG	XBB.1.5	Italy	EPI_ISL_18072203	2023-07-19
BG	XBB.1.5	USA	EPI_ISL_18081477	2023-07-19
BG	XBB.1.5	Canada	EPI_ISL_18055189	2023-07-19
BG	XBB.1.5	Costa Rica	EPI_ISL_18110141	2023-07-19
BG	XBB.1.5	Italy	EPI_ISL_18015523	2023-07-19
BG	XBB.1.5	USA	EPI_ISL_18110173	2023-07-19
BG	XBB.1.5	Costa Rica	EPI_ISL_18110142	2023-07-19
BG	XBB.1.5	Argentina	EPI_ISL_18101662	2023-07-19
BG	XBB.1.5	USA	EPI_ISL_18114285	2023-07-19
BG	XBB.1.5	USA	EPI_ISL_18070023	2023-07-19
BG	XBB.1.5	Georgia	EPI_ISL_18072194	2023-07-19
BG	XBB.1.5	USA	EPI_ISL_18059618	2023-07-19
BG	XBB.1.5	Israel	EPI_ISL_18050870	2023-07-19
BG	XBB.1.5	Spain	EPI_ISL_18113509	2023-07-19
BG	XBB.1.5	USA	EPI_ISL_18060711	2023-07-19
BG	XBB.1.5	Iceland	EPI_ISL_18044188	2023-07-19
BG	XBB.1.5	USA	EPI_ISL_18072656	2023-07-19
BG	XBB.1.5	Canada	EPI_ISL_18059707	2023-07-19
BG	XBB.1.5	Japan	EPI_ISL_18071743	2023-07-19
BG	XBB.1.5	USA	EPI_ISL_18057337	2023-07-19
BG	XBB.1.5	South Korea	EPI_ISL_18116949	2023-07-19
BG	XBB.1.5	USA	EPI_ISL_18057069	2023-07-19
BG	XBB.1.5.103	USA	EPI_ISL_18050275	2023-07-19
BG	XBB.1.5.104	Spain	EPI_ISL_18044148	2023-07-19
BG	XBB.1.5.104	USA	EPI_ISL_18110104	2023-07-19
BG	XBB.1.5.105	USA	EPI_ISL_18072667	2023-07-19
BG	XBB.1.5.106	USA	EPI_ISL_18114031	2023-07-19
BG	XBB.1.5.17	United Kingdom	EPI_ISL_18098221	2023-07-19
BG	XBB.1.5.55	Japan	EPI_ISL_18100462	2023-07-19
BG	XBB.1.5.72	Netherlands	EPI_ISL_18098293	2023-07-19
BG	XBB.1.5.72	Israel	EPI_ISL_18050837	2023-07-19
BG	XBB.1.5.72	USA	EPI_ISL_18057071	2023-07-19
BG	XBB.1.5.72	Puerto Rico	EPI_ISL_18107231	2023-07-19
BG	XBB.1.5.72	Canada	EPI_ISL_18055305	2023-07-19
BG	XBB.1.5.72	USA	EPI_ISL_18072679	2023-07-19
BG	XBB.1.5.72	USA	EPI_ISL_18057925	2023-07-19
BG	XBB.1.5.72	USA	EPI_ISL_18069669	2023-07-19
BG	XBB.1.5.73	Canada	EPI_ISL_18062460	2023-07-19
BG	XBB.1.5.77	Israel	EPI_ISL_18050854	2023-07-19
BG	XBB.1.5.77	USA	EPI_ISL_18107916	2023-07-19
BG	XBB.1.5.77	USA	EPI_ISL_18072670	2023-07-19
BG	XBB.1.5.77	USA	EPI_ISL_18114157	2023-07-19
BG	XBB.1.5.81	USA	EPI_ISL_18069738	2023-07-19
BG	XBB.1.5.89	Canary Islands	EPI_ISL_18106981	2023-07-19
BG	XBB.1.5.89	USA	EPI_ISL_18069825	2023-07-19
BG	XBB.1.5.91	Japan	EPI_ISL_18056451	2023-07-19
BG	XBB.1.5.92	Canada	EPI_ISL_18055214	2023-07-19
BG	XBB.1.5.94	Spain	EPI_ISL_18113507	2023-07-19
BG	XBB.1.5.98	Spain	EPI_ISL_18113508	2023-07-19
BG	HR.1	USA	EPI_ISL_18113998	2023-07-20
BG	JD.1.2	Brazil	EPI_ISL_18109272	2023-07-20
BG	XBB.1.5	China	EPI_ISL_18105695	2023-07-20
BG	XBB.1.5	USA	EPI_ISL_18072693	2023-07-20
BG	XBB.1.5	Canary Islands	EPI_ISL_18106996	2023-07-20
BG	XBB.1.5	Spain	EPI_ISL_18118195	2023-07-20
BG	XBB.1.5	USA	EPI_ISL_18059628	2023-07-20
BG	XBB.1.5	Japan	EPI_ISL_18082389	2023-07-20
BG	XBB.1.5	United Kingdom	EPI_ISL_18072025	2023-07-20
BG	XBB.1.5	USA	EPI_ISL_18059638	2023-07-20
BG	XBB.1.5	Japan	EPI_ISL_18082987	2023-07-20
BG	XBB.1.5	Japan	EPI_ISL_18051735	2023-07-20
BG	XBB.1.5	USA	EPI_ISL_18110044	2023-07-20
BG	XBB.1.5	USA	EPI_ISL_18113920	2023-07-20
BG	XBB.1.5	USA	EPI_ISL_18107697	2023-07-20
BG	XBB.1.5	USA	EPI_ISL_18057182	2023-07-20
BG	XBB.1.5	United Kingdom	EPI_ISL_18072035	2023-07-20
BG	XBB.1.5	USA	EPI_ISL_18081374	2023-07-20
BG	XBB.1.5	Japan	EPI_ISL_18100460	2023-07-20
BG	XBB.1.5	Canada	EPI_ISL_18099832	2023-07-20
BG	XBB.1.5	USA	EPI_ISL_18081381	2023-07-20
BG	XBB.1.5	Netherlands	EPI_ISL_18054467	2023-07-20
BG	XBB.1.5	USA	EPI_ISL_18082223	2023-07-20
BG	XBB.1.5	USA	EPI_ISL_18114153	2023-07-20
BG	XBB.1.5	USA	EPI_ISL_18065373	2023-07-20
BG	XBB.1.5	China	EPI_ISL_18060791	2023-07-20
BG	XBB.1.5	China	EPI_ISL_18055582	2023-07-20
BG	XBB.1.5	Canada	EPI_ISL_18059709	2023-07-20
BG	XBB.1.5	Canada	EPI_ISL_18062434	2023-07-20
BG	XBB.1.5	Canary Islands	EPI_ISL_18106993	2023-07-20
BG	XBB.1.5	Japan	EPI_ISL_18097614	2023-07-20
BG	XBB.1.5	USA	EPI_ISL_18057294	2023-07-20
BG	XBB.1.5.103	USA	EPI_ISL_18110172	2023-07-20
BG	XBB.1.5.103	Argentina	EPI_ISL_18097217	2023-07-20
BG	XBB.1.5.103	USA	EPI_ISL_18049313	2023-07-20
BG	XBB.1.5.104	USA	EPI_ISL_18113382	2023-07-20
BG	XBB.1.5.105	USA	EPI_ISL_18049200	2023-07-20
BG	XBB.1.5.106	Guatemala	EPI_ISL_18099398	2023-07-20
BG	XBB.1.5.106	Guatemala	EPI_ISL_18099434	2023-07-20
BG	XBB.1.5.55	Japan	EPI_ISL_18100467	2023-07-20
BG	XBB.1.5.72	Netherlands	EPI_ISL_18098292	2023-07-20
BG	XBB.1.5.72	USA	EPI_ISL_18077379	2023-07-20
BG	XBB.1.5.72	USA	EPI_ISL_18057095	2023-07-20
BG	XBB.1.5.72	Canada	EPI_ISL_18055333	2023-07-20
BG	XBB.1.5.72	USA	EPI_ISL_18114245	2023-07-20
BG	XBB.1.5.72	Canada	EPI_ISL_18055227	2023-07-20
BG	XBB.1.5.72	Canada	EPI_ISL_18055293	2023-07-20
BG	XBB.1.5.72	Canada	EPI_ISL_18055225	2023-07-20
BG	XBB.1.5.72	Canada	EPI_ISL_18055288	2023-07-20
BG	XBB.1.5.72	Canada	EPI_ISL_18053087	2023-07-20
BG	XBB.1.5.72	USA	EPI_ISL_18057939	2023-07-20
BG	XBB.1.5.72	USA	EPI_ISL_18077385	2023-07-20
BG	XBB.1.5.73	Ecuador	EPI_ISL_18075766	2023-07-20
BG	XBB.1.5.76	Costa Rica	EPI_ISL_18110134	2023-07-20
BG	XBB.1.5.78	Guatemala	EPI_ISL_18099385	2023-07-20
BG	XBB.1.5.86	USA	EPI_ISL_18114121	2023-07-20
BG	XBB.1.5.90	Japan	EPI_ISL_18101027	2023-07-20
BG	XBB.1.5.94	USA	EPI_ISL_18114307	2023-07-20
BG	XBB.1.5.95	Israel	EPI_ISL_18050865	2023-07-20
BG	GK.1	Luxembourg	EPI_ISL_18107108	2023-07-21
BG	HA.1	USA	EPI_ISL_18049302	2023-07-21
BG	HR.1	Australia	EPI_ISL_18060426	2023-07-21
BG	JD.1	Brazil	EPI_ISL_18109273	2023-07-21
BG	XBB.1.33	Italy	EPI_ISL_18106786	2023-07-21
BG	XBB.1.44.1	China	EPI_ISL_18108871	2023-07-21
BG	XBB.1.5	USA	EPI_ISL_18077395	2023-07-21
BG	XBB.1.5	USA	EPI_ISL_18057327	2023-07-21
BG	XBB.1.5	South Korea	EPI_ISL_18111674	2023-07-21
BG	XBB.1.5	USA	EPI_ISL_18057222	2023-07-21
BG	XBB.1.5	USA	EPI_ISL_18107700	2023-07-21
BG	XBB.1.5	Japan	EPI_ISL_18106318	2023-07-21
BG	XBB.1.5	Canada	EPI_ISL_18055297	2023-07-21
BG	XBB.1.5	Thailand	EPI_ISL_18064532	2023-07-21
BG	XBB.1.5	United Kingdom	EPI_ISL_18072069	2023-07-21
BG	XBB.1.5	USA	EPI_ISL_18115196	2023-07-21
BG	XBB.1.5	USA	EPI_ISL_18037725	2023-07-21
BG	XBB.1.5	USA	EPI_ISL_18107607	2023-07-21
BG	XBB.1.5	Guatemala	EPI_ISL_18099395	2023-07-21
BG	XBB.1.5	USA	EPI_ISL_18057966	2023-07-21
BG	XBB.1.5	Japan	EPI_ISL_18082393	2023-07-21
BG	XBB.1.5	USA	EPI_ISL_18049899	2023-07-21
BG	XBB.1.5	USA	EPI_ISL_18107705	2023-07-21
BG	XBB.1.5	Japan	EPI_ISL_18051742	2023-07-21
BG	XBB.1.5	Japan	EPI_ISL_18051741	2023-07-21
BG	XBB.1.5	USA	EPI_ISL_18057282	2023-07-21
BG	XBB.1.5	South Korea	EPI_ISL_18063025	2023-07-21
BG	XBB.1.5	USA	EPI_ISL_18095848	2023-07-21
BG	XBB.1.5	USA	EPI_ISL_18114166	2023-07-21
BG	XBB.1.5	Japan	EPI_ISL_18071677	2023-07-21
BG	XBB.1.5	USA	EPI_ISL_18095832	2023-07-21
BG	XBB.1.5	USA	EPI_ISL_18049917	2023-07-21
BG	XBB.1.5	United Kingdom	EPI_ISL_18066795	2023-07-21
BG	XBB.1.5	USA	EPI_ISL_18072720	2023-07-21
BG	XBB.1.5	USA	EPI_ISL_18058170	2023-07-21
BG	XBB.1.5	USA	EPI_ISL_18108158	2023-07-21
BG	XBB.1.5	Japan	EPI_ISL_18097472	2023-07-21
BG	XBB.1.5	USA	EPI_ISL_18057955	2023-07-21
BG	XBB.1.5	USA	EPI_ISL_18081434	2023-07-21
BG	XBB.1.5	Canada	EPI_ISL_18059711	2023-07-21
BG	XBB.1.5	USA	EPI_ISL_18095820	2023-07-21
BG	XBB.1.5	Guatemala	EPI_ISL_18099419	2023-07-21
BG	XBB.1.5	Spain	EPI_ISL_18098542	2023-07-21
BG	XBB.1.5.100	USA	EPI_ISL_18107701	2023-07-21
BG	XBB.1.5.103	USA	EPI_ISL_18107704	2023-07-21
BG	XBB.1.5.103	USA	EPI_ISL_18107867	2023-07-21
BG	XBB.1.5.104	USA	EPI_ISL_18090075	2023-07-21
BG	XBB.1.5.104	USA	EPI_ISL_18113386	2023-07-21
BG	XBB.1.5.105	USA	EPI_ISL_18113969	2023-07-21
BG	XBB.1.5.106	Canada	EPI_ISL_18055283	2023-07-21
BG	XBB.1.5.44	Canada	EPI_ISL_18053102	2023-07-21
BG	XBB.1.5.72	USA	EPI_ISL_18095724	2023-07-21
BG	XBB.1.5.72	Spain	EPI_ISL_18118286	2023-07-21
BG	XBB.1.5.72	USA	EPI_ISL_18111293	2023-07-21
BG	XBB.1.5.72	USA	EPI_ISL_18072738	2023-07-21
BG	XBB.1.5.72	Canada	EPI_ISL_18055314	2023-07-21
BG	XBB.1.5.72	USA	EPI_ISL_18057186	2023-07-21
BG	XBB.1.5.73	USA	EPI_ISL_18059514	2023-07-21
BG	XBB.1.5.73	Ecuador	EPI_ISL_18075767	2023-07-21
BG	XBB.1.5.77	Guatemala	EPI_ISL_18099393	2023-07-21
BG	XBB.1.5.78	Ecuador	EPI_ISL_18075768	2023-07-21
BG	XBB.1.5.90	Japan	EPI_ISL_18101036	2023-07-21
BG	XBB.1.5.94	France	EPI_ISL_18044764	2023-07-21
BG	GK.2	USA	EPI_ISL_18095859	2023-07-22
BG	GN.4	USA	EPI_ISL_18072743	2023-07-22
BG	XBB.1.5	Canada	EPI_ISL_18053105	2023-07-22
BG	XBB.1.5	USA	EPI_ISL_18072745	2023-07-22
BG	XBB.1.5	USA	EPI_ISL_18081550	2023-07-22
BG	XBB.1.5	USA	EPI_ISL_18072742	2023-07-22
BG	XBB.1.5	USA	EPI_ISL_18095877	2023-07-22
BG	XBB.1.5	Canada	EPI_ISL_18053104	2023-07-22
BG	XBB.1.5	Australia	EPI_ISL_18060432	2023-07-22
BG	XBB.1.5	China	EPI_ISL_18074382	2023-07-22
BG	XBB.1.5	Guatemala	EPI_ISL_18099414	2023-07-22
BG	XBB.1.5.104	Spain	EPI_ISL_18063195	2023-07-22
BG	XBB.1.5.106	USA	EPI_ISL_18072850	2023-07-22
BG	XBB.1.5.55	Japan	EPI_ISL_18100494	2023-07-22
BG	XBB.1.5.72	USA	EPI_ISL_18107752	2023-07-22
BG	XBB.1.5.72	USA	EPI_ISL_18073898	2023-07-22
BG	XBB.1.5.72	USA	EPI_ISL_18106364	2023-07-22
BG	XBB.1.5.72	China	EPI_ISL_18074375	2023-07-22
BG	XBB.1.5.72	Canada	EPI_ISL_18055331	2023-07-22
BG	XBB.1.5.77	USA	EPI_ISL_18114160	2023-07-22
BG	XBB.1.5.77	USA	EPI_ISL_18095681	2023-07-22
BG	XBB.1.5.81	USA	EPI_ISL_18080088	2023-07-22
BG	XBB.1.5.90	Japan	EPI_ISL_18097643	2023-07-22
BG	XBB.1.5.92	USA	EPI_ISL_18103756	2023-07-22
BG	BA.2.75.6	Singapore	EPI_ISL_18056643	2023-07-23
BG	GK.1	Israel	EPI_ISL_18050853	2023-07-23
BG	HA.2	USA	EPI_ISL_18081535	2023-07-23
BG	HQ.1	Canada	EPI_ISL_18074007	2023-07-23
BG	HR.1	USA	EPI_ISL_18114091	2023-07-23
BG	HR.1	USA	EPI_ISL_18114263	2023-07-23
BG	XBB.1.5	USA	EPI_ISL_18057194	2023-07-23
BG	XBB.1.5	USA	EPI_ISL_18057243	2023-07-23
BG	XBB.1.5	South Korea	EPI_ISL_18117211	2023-07-23
BG	XBB.1.5	Canada	EPI_ISL_18055345	2023-07-23
BG	XBB.1.5	Canada	EPI_ISL_18113698	2023-07-23
BG	XBB.1.5	USA	EPI_ISL_18057193	2023-07-23
BG	XBB.1.5	USA	EPI_ISL_18057218	2023-07-23
BG	XBB.1.5	USA	EPI_ISL_18107725	2023-07-23
BG	XBB.1.5	South Korea	EPI_ISL_18117306	2023-07-23
BG	XBB.1.5	Canada	EPI_ISL_18053103	2023-07-23
BG	XBB.1.5	South Korea	EPI_ISL_18117177	2023-07-23
BG	XBB.1.5	South Korea	EPI_ISL_18117191	2023-07-23
BG	XBB.1.5	South Korea	EPI_ISL_18117281	2023-07-23
BG	XBB.1.5	USA	EPI_ISL_18080103	2023-07-23
BG	XBB.1.5	United Kingdom	EPI_ISL_18094222	2023-07-23
BG	XBB.1.5	USA	EPI_ISL_18081522	2023-07-23
BG	XBB.1.5	USA	EPI_ISL_18090111	2023-07-23
BG	XBB.1.5	USA	EPI_ISL_18107856	2023-07-23
BG	XBB.1.5	USA	EPI_ISL_18113922	2023-07-23
BG	XBB.1.5.106	Guatemala	EPI_ISL_18099397	2023-07-23
BG	XBB.1.5.106	Guatemala	EPI_ISL_18099389	2023-07-23
BG	XBB.1.5.106	Guatemala	EPI_ISL_18099432	2023-07-23
BG	XBB.1.5.72	USA	EPI_ISL_18095902	2023-07-23
BG	XBB.1.5.72	USA	EPI_ISL_18080101	2023-07-23
BG	XBB.1.5.72	USA	EPI_ISL_18057322	2023-07-23
BG	XBB.1.5.72	USA	EPI_ISL_18090308	2023-07-23
BG	XBB.1.5.72	Canada	EPI_ISL_18055292	2023-07-23
BG	XBB.1.5.72	Canada	EPI_ISL_18055294	2023-07-23
BG	XBB.1.5.72	Canada	EPI_ISL_18074004	2023-07-23
BG	XBB.1.5.72	Spain	EPI_ISL_18063215	2023-07-23
BG	XBB.1.5.72	USA	EPI_ISL_18056968	2023-07-23
BG	XBB.1.5.78	USA	EPI_ISL_18110811	2023-07-23
BG	XBB.1.5.89	Canada	EPI_ISL_18073973	2023-07-23
BG	XBB.1.5.89	Canada	EPI_ISL_18074026	2023-07-23
BG	BA.2.75.6	Singapore	EPI_ISL_18056644	2023-07-24
BG	BA.2.86.1	Denmark	EPI_ISL_18097345	2023-07-24
BG	GN.4	Spain	EPI_ISL_18063201	2023-07-24
BG	GN.4	USA	EPI_ISL_18114250	2023-07-24
BG	HA.1	USA	EPI_ISL_18114154	2023-07-24
BG	HA.1	USA	EPI_ISL_18104133	2023-07-24
BG	HA.1	Spain	EPI_ISL_18056882	2023-07-24
BG	HA.2	USA	EPI_ISL_18095917	2023-07-24
BG	HQ.1	Canada	EPI_ISL_18074046	2023-07-24
BG	HR.1	Australia	EPI_ISL_18093873	2023-07-24
BG	HR.1	USA	EPI_ISL_18114170	2023-07-24
BG	HR.1	Costa Rica	EPI_ISL_18110152	2023-07-24
BG	JD.1.2	Brazil	EPI_ISL_18107192	2023-07-24
BG	JD.2	Argentina	EPI_ISL_18101644	2023-07-24
BG	XBB.1.16.11	USA	EPI_ISL_18099230	2023-07-24
BG	XBB.1.5	USA	EPI_ISL_18077422	2023-07-24
BG	XBB.1.5	Denmark	EPI_ISL_18071885	2023-07-24
BG	XBB.1.5	Japan	EPI_ISL_18097495	2023-07-24
BG	XBB.1.5	South Korea	EPI_ISL_18117488	2023-07-24
BG	XBB.1.5	Japan	EPI_ISL_18097123	2023-07-24
BG	XBB.1.5	Canada	EPI_ISL_18053111	2023-07-24
BG	XBB.1.5	Canada	EPI_ISL_18053110	2023-07-24
BG	XBB.1.5	Canada	EPI_ISL_18073942	2023-07-24
BG	XBB.1.5	United Kingdom	EPI_ISL_18088305	2023-07-24
BG	XBB.1.5	Spain	EPI_ISL_18095938	2023-07-24
BG	XBB.1.5	USA	EPI_ISL_18095904	2023-07-24
BG	XBB.1.5	USA	EPI_ISL_18099014	2023-07-24
BG	XBB.1.5	Canada	EPI_ISL_18074077	2023-07-24
BG	XBB.1.5	USA	EPI_ISL_18081551	2023-07-24
BG	XBB.1.5	USA	EPI_ISL_18098941	2023-07-24
BG	XBB.1.5	USA	EPI_ISL_18114243	2023-07-24
BG	XBB.1.5	USA	EPI_ISL_18099067	2023-07-24
BG	XBB.1.5	Denmark	EPI_ISL_18097349	2023-07-24
BG	XBB.1.5	Canada	EPI_ISL_18055392	2023-07-24
BG	XBB.1.5	USA	EPI_ISL_18113842	2023-07-24
BG	XBB.1.5	Japan	EPI_ISL_18065251	2023-07-24
BG	XBB.1.5	Canada	EPI_ISL_18053113	2023-07-24
BG	XBB.1.5	Canada	EPI_ISL_18053109	2023-07-24
BG	XBB.1.5	Canada	EPI_ISL_18053112	2023-07-24
BG	XBB.1.5	USA	EPI_ISL_18081518	2023-07-24
BG	XBB.1.5	Germany	EPI_ISL_18094030	2023-07-24
BG	XBB.1.5	USA	EPI_ISL_18081396	2023-07-24
BG	XBB.1.5	United Kingdom	EPI_ISL_18072042	2023-07-24
BG	XBB.1.5	Canada	EPI_ISL_18076392	2023-07-24
BG	XBB.1.5	Canada	EPI_ISL_18074021	2023-07-24
BG	XBB.1.5	USA	EPI_ISL_18108162	2023-07-24
BG	XBB.1.5	Germany	EPI_ISL_18112095	2023-07-24
BG	XBB.1.5	USA	EPI_ISL_18081468	2023-07-24
BG	XBB.1.5	USA	EPI_ISL_18072350	2023-07-24
BG	XBB.1.5	USA	EPI_ISL_18113393	2023-07-24
BG	XBB.1.5	Iceland	EPI_ISL_18044206	2023-07-24
BG	XBB.1.5	USA	EPI_ISL_18073907	2023-07-24
BG	XBB.1.5	USA	EPI_ISL_18113392	2023-07-24
BG	XBB.1.5	USA	EPI_ISL_18080110	2023-07-24
BG	XBB.1.5	USA	EPI_ISL_18114374	2023-07-24
BG	XBB.1.5	South Korea	EPI_ISL_18117323	2023-07-24
BG	XBB.1.5.105	Denmark	EPI_ISL_18071875	2023-07-24
BG	XBB.1.5.105	France	EPI_ISL_18109827	2023-07-24
BG	XBB.1.5.105	France	EPI_ISL_18109825	2023-07-24
BG	XBB.1.5.106	Guatemala	EPI_ISL_18099390	2023-07-24
BG	XBB.1.5.106	Guatemala	EPI_ISL_18099417	2023-07-24
BG	XBB.1.5.106	USA	EPI_ISL_18078977	2023-07-24
BG	XBB.1.5.106	USA	EPI_ISL_18113977	2023-07-24
BG	XBB.1.5.72	USA	EPI_ISL_18114066	2023-07-24
BG	XBB.1.5.72	USA	EPI_ISL_18099060	2023-07-24
BG	XBB.1.5.72	USA	EPI_ISL_18099025	2023-07-24
BG	XBB.1.5.72	Spain	EPI_ISL_18110126	2023-07-24
BG	XBB.1.5.72	USA	EPI_ISL_18095906	2023-07-24
BG	XBB.1.5.72	USA	EPI_ISL_18113803	2023-07-24
BG	XBB.1.5.72	Puerto Rico	EPI_ISL_18107257	2023-07-24
BG	XBB.1.5.72	USA	EPI_ISL_18057986	2023-07-24
BG	XBB.1.5.72	USA	EPI_ISL_18107717	2023-07-24
BG	XBB.1.5.72	Costa Rica	EPI_ISL_18110159	2023-07-24
BG	XBB.1.5.72	USA	EPI_ISL_18090134	2023-07-24
BG	XBB.1.5.72	USA	EPI_ISL_18099229	2023-07-24
BG	XBB.1.5.72	USA	EPI_ISL_18104134	2023-07-24
BG	XBB.1.5.72	USA	EPI_ISL_18080136	2023-07-24
BG	XBB.1.5.73	South Korea	EPI_ISL_18117500	2023-07-24
BG	XBB.1.5.73	France	EPI_ISL_18109739	2023-07-24
BG	XBB.1.5.73	Peru	EPI_ISL_18038249	2023-07-24
BG	XBB.1.5.75	USA	EPI_ISL_18095924	2023-07-24
BG	XBB.1.5.77	USA	EPI_ISL_18111375	2023-07-24
BG	XBB.1.5.77	USA	EPI_ISL_18072853	2023-07-24
BG	XBB.1.5.80	USA	EPI_ISL_18098988	2023-07-24
BG	XBB.1.5.86	Canada	EPI_ISL_18074017	2023-07-24
BG	XBB.1.5.89	France	EPI_ISL_18094649	2023-07-24
BG	XCK	Nigeria	EPI_ISL_18110470	2023-07-24
BG	XCK	USA	EPI_ISL_18111443	2023-07-24
FG	BA.2.86.2	South Africa	EPI_ISL_18125259	2023-07-24
BG	HA.1	USA	EPI_ISL_18080190	2023-07-25
BG	HA.2	USA	EPI_ISL_18110183	2023-07-25
BG	HA.2	USA	EPI_ISL_18113430	2023-07-25
BG	HR.1	Canada	EPI_ISL_18073945	2023-07-25
BG	HR.1	USA	EPI_ISL_18114125	2023-07-25
BG	JD.1.1	Spain	EPI_ISL_18095944	2023-07-25
BG	JD.1.1	Spain	EPI_ISL_18072815	2023-07-25
BG	JD.1.1	Spain	EPI_ISL_18072823	2023-07-25
BG	JD.1.1	Spain	EPI_ISL_18072824	2023-07-25
BG	JD.1.2	USA	EPI_ISL_18114143	2023-07-25
BG	JD.1.2	Brazil	EPI_ISL_18113591	2023-07-25
BG	JD.1.2	Brazil	EPI_ISL_18109274	2023-07-25
BG	XBB.1.33	Italy	EPI_ISL_18063192	2023-07-25
BG	XBB.1.5	USA	EPI_ISL_18114131	2023-07-25
BG	XBB.1.5	USA	EPI_ISL_18111304	2023-07-25
BG	XBB.1.5	USA	EPI_ISL_18095741	2023-07-25
BG	XBB.1.5	USA	EPI_ISL_18115451	2023-07-25
BG	XBB.1.5	USA	EPI_ISL_18065799	2023-07-25
BG	XBB.1.5	Japan	EPI_ISL_18097128	2023-07-25
BG	XBB.1.5	Japan	EPI_ISL_18082791	2023-07-25
BG	XBB.1.5	South Korea	EPI_ISL_18117601	2023-07-25
BG	XBB.1.5	South Korea	EPI_ISL_18117632	2023-07-25
BG	XBB.1.5	USA	EPI_ISL_18104246	2023-07-25
BG	XBB.1.5	USA	EPI_ISL_18113911	2023-07-25
BG	XBB.1.5	USA	EPI_ISL_18114192	2023-07-25
BG	XBB.1.5	USA	EPI_ISL_18115245	2023-07-25
BG	XBB.1.5	USA	EPI_ISL_18115249	2023-07-25
BG	XBB.1.5	Dominican Republic	EPI_ISL_18077203	2023-07-25
BG	XBB.1.5	USA	EPI_ISL_18114370	2023-07-25
BG	XBB.1.5	USA	EPI_ISL_18104242	2023-07-25
BG	XBB.1.5	USA	EPI_ISL_18078847	2023-07-25
BG	XBB.1.5	Singapore	EPI_ISL_18056535	2023-07-25
BG	XBB.1.5	USA	EPI_ISL_18104219	2023-07-25
BG	XBB.1.5	USA	EPI_ISL_18113902	2023-07-25
BG	XBB.1.5	Japan	EPI_ISL_18097135	2023-07-25
BG	XBB.1.5	USA	EPI_ISL_18113831	2023-07-25
BG	XBB.1.5	Canada	EPI_ISL_18055359	2023-07-25
BG	XBB.1.5	USA	EPI_ISL_18104237	2023-07-25
BG	XBB.1.5	USA	EPI_ISL_18107721	2023-07-25
BG	XBB.1.5	Canada	EPI_ISL_18113692	2023-07-25
BG	XBB.1.5	USA	EPI_ISL_18065784	2023-07-25
BG	XBB.1.5	Israel	EPI_ISL_18062641	2023-07-25
BG	XBB.1.5	Germany	EPI_ISL_18112096	2023-07-25
BG	XBB.1.5	USA	EPI_ISL_18104187	2023-07-25
BG	XBB.1.5	USA	EPI_ISL_18080153	2023-07-25
BG	XBB.1.5	Iceland	EPI_ISL_18094124	2023-07-25
BG	XBB.1.5	USA	EPI_ISL_18080179	2023-07-25
BG	XBB.1.5	Canada	EPI_ISL_18099855	2023-07-25
BG	XBB.1.5	Canada	EPI_ISL_18113704	2023-07-25
BG	XBB.1.5	USA	EPI_ISL_18113879	2023-07-25
BG	XBB.1.5	USA	EPI_ISL_18104184	2023-07-25
BG	XBB.1.5	Costa Rica	EPI_ISL_18110158	2023-07-25
BG	XBB.1.5	USA	EPI_ISL_18113826	2023-07-25
BG	XBB.1.5	USA	EPI_ISL_18113946	2023-07-25
BG	XBB.1.5	USA	EPI_ISL_18099023	2023-07-25
BG	XBB.1.5.100	USA	EPI_ISL_18104163	2023-07-25
BG	XBB.1.5.103	USA	EPI_ISL_18107738	2023-07-25
BG	XBB.1.5.105	United Kingdom	EPI_ISL_18094213	2023-07-25
BG	XBB.1.5.106	Guatemala	EPI_ISL_18099423	2023-07-25
BG	XBB.1.5.37	USA	EPI_ISL_18099105	2023-07-25
BG	XBB.1.5.72	USA	EPI_ISL_18107600	2023-07-25
BG	XBB.1.5.72	Costa Rica	EPI_ISL_18110155	2023-07-25
BG	XBB.1.5.72	USA	EPI_ISL_18113870	2023-07-25
BG	XBB.1.5.72	USA	EPI_ISL_18098906	2023-07-25
BG	XBB.1.5.72	USA	EPI_ISL_18098920	2023-07-25
BG	XBB.1.5.72	Canada	EPI_ISL_18055348	2023-07-25
BG	XBB.1.5.72	Canada	EPI_ISL_18055349	2023-07-25
BG	XBB.1.5.72	USA	EPI_ISL_18080182	2023-07-25
BG	XBB.1.5.72	Costa Rica	EPI_ISL_18110161	2023-07-25
BG	XBB.1.5.72	USA	EPI_ISL_18104256	2023-07-25
BG	XBB.1.5.72	USA	EPI_ISL_18095424	2023-07-25
BG	XBB.1.5.72	USA	EPI_ISL_18114185	2023-07-25
BG	XBB.1.5.72	USA	EPI_ISL_18104213	2023-07-25
BG	XBB.1.5.72	USA	EPI_ISL_18104255	2023-07-25
BG	XBB.1.5.76	USA	EPI_ISL_18113980	2023-07-25
BG	XBB.1.5.77	Guatemala	EPI_ISL_18099427	2023-07-25
BG	XBB.1.5.77	Guatemala	EPI_ISL_18099411	2023-07-25
BG	XBB.1.5.77	Ecuador	EPI_ISL_18076697	2023-07-25
BG	XBB.1.5.86	USA	EPI_ISL_18080174	2023-07-25
BG	XBB.1.5.91	Japan	EPI_ISL_18051750	2023-07-25
BG	XBB.1.5.92	USA	EPI_ISL_18104230	2023-07-25
BG	BA.2	Netherlands	EPI_ISL_18098299	2023-07-26
BG	HQ.1	USA	EPI_ISL_18080228	2023-07-26
BG	HR.1	USA	EPI_ISL_18098935	2023-07-26
BG	JD.1.2	USA	EPI_ISL_18104265	2023-07-26
BG	XBB.1.5	USA	EPI_ISL_18098997	2023-07-26
BG	XBB.1.5	USA	EPI_ISL_18098937	2023-07-26
BG	XBB.1.5	USA	EPI_ISL_18107768	2023-07-26
BG	XBB.1.5	Japan	EPI_ISL_18106164	2023-07-26
BG	XBB.1.5	Canada	EPI_ISL_18076444	2023-07-26
BG	XBB.1.5	USA	EPI_ISL_18080208	2023-07-26
BG	XBB.1.5	USA	EPI_ISL_18104275	2023-07-26
BG	XBB.1.5	USA	EPI_ISL_18114053	2023-07-26
BG	XBB.1.5	USA	EPI_ISL_18114159	2023-07-26
BG	XBB.1.5	USA	EPI_ISL_18090164	2023-07-26
BG	XBB.1.5	USA	EPI_ISL_18080206	2023-07-26
BG	XBB.1.5	USA	EPI_ISL_18099238	2023-07-26
BG	XBB.1.5	Japan	EPI_ISL_18116225	2023-07-26
BG	XBB.1.5	Canada	EPI_ISL_18076448	2023-07-26
BG	XBB.1.5	USA	EPI_ISL_18104305	2023-07-26
BG	XBB.1.5	Canada	EPI_ISL_18053115	2023-07-26
BG	XBB.1.5	USA	EPI_ISL_18114004	2023-07-26
BG	XBB.1.5	Spain	EPI_ISL_18063203	2023-07-26
BG	XBB.1.5	USA	EPI_ISL_18098960	2023-07-26
BG	XBB.1.5	Canada	EPI_ISL_18076446	2023-07-26
BG	XBB.1.5	USA	EPI_ISL_18080225	2023-07-26
BG	XBB.1.5	USA	EPI_ISL_18090174	2023-07-26
BG	XBB.1.5	USA	EPI_ISL_18104359	2023-07-26
BG	XBB.1.5	USA	EPI_ISL_18114032	2023-07-26
BG	XBB.1.5	Israel	EPI_ISL_18062642	2023-07-26
BG	XBB.1.5	USA	EPI_ISL_18099006	2023-07-26
BG	XBB.1.5	Spain	EPI_ISL_18098532	2023-07-26
BG	XBB.1.5	Spain	EPI_ISL_18112359	2023-07-26
BG	XBB.1.5	Canada	EPI_ISL_18113715	2023-07-26
BG	XBB.1.5	USA	EPI_ISL_18114207	2023-07-26
BG	XBB.1.5	USA	EPI_ISL_18104290	2023-07-26
BG	XBB.1.5	USA	EPI_ISL_18104269	2023-07-26
BG	XBB.1.5.105	United Kingdom	EPI_ISL_18094224	2023-07-26
BG	XBB.1.5.106	USA	EPI_ISL_18104341	2023-07-26
BG	XBB.1.5.72	USA	EPI_ISL_18067197	2023-07-26
BG	XBB.1.5.72	Ireland	EPI_ISL_18076178	2023-07-26
BG	XBB.1.5.72	Ireland	EPI_ISL_18076179	2023-07-26
BG	XBB.1.5.72	USA	EPI_ISL_18104322	2023-07-26
BG	XBB.1.5.72	USA	EPI_ISL_18104326	2023-07-26
BG	XBB.1.5.72	USA	EPI_ISL_18115207	2023-07-26
BG	XBB.1.5.72	Israel	EPI_ISL_18062681	2023-07-26
BG	XBB.1.5.72	USA	EPI_ISL_18080213	2023-07-26
BG	XBB.1.5.72	USA	EPI_ISL_18104351	2023-07-26
BG	XBB.1.5.72	Ireland	EPI_ISL_18076176	2023-07-26
BG	XBB.1.5.72	USA	EPI_ISL_18110843	2023-07-26
BG	XBB.1.5.72	USA	EPI_ISL_18114259	2023-07-26
BG	XBB.1.5.72	Italy	EPI_ISL_18071917	2023-07-26
BG	XBB.1.5.72	USA	EPI_ISL_18078850	2023-07-26
BG	XBB.1.5.72	USA	EPI_ISL_18080201	2023-07-26
BG	XBB.1.5.73	USA	EPI_ISL_18090055	2023-07-26
BG	XBB.1.5.75	USA	EPI_ISL_18104310	2023-07-26
BG	XBB.1.5.86	USA	EPI_ISL_18107610	2023-07-26
BG	XBB.1.5.89	USA	EPI_ISL_18098391	2023-07-26
BG	XBB.1.5.92	USA	EPI_ISL_18080198	2023-07-26
BG	XBB.1.5.92	USA	EPI_ISL_18114056	2023-07-26
BG	XBB.1.5.94	Spain	EPI_ISL_18095946	2023-07-26
BG	XBB.1.5.95	USA	EPI_ISL_18113896	2023-07-26
BG	HA.1	USA	EPI_ISL_18104421	2023-07-27
BG	HR.1	USA	EPI_ISL_18107594	2023-07-27
BG	JD.1	Brazil	EPI_ISL_18109276	2023-07-27
BG	XBB.1.16.11	USA	EPI_ISL_18098931	2023-07-27
BG	XBB.1.5	USA	EPI_ISL_18107883	2023-07-27
BG	XBB.1.5	USA	EPI_ISL_18098968	2023-07-27
BG	XBB.1.5	Thailand	EPI_ISL_18112640	2023-07-27
BG	XBB.1.5	USA	EPI_ISL_18104443	2023-07-27
BG	XBB.1.5	USA	EPI_ISL_18104431	2023-07-27
BG	XBB.1.5	USA	EPI_ISL_18115222	2023-07-27
BG	XBB.1.5	USA	EPI_ISL_18095698	2023-07-27
BG	XBB.1.5	Canada	EPI_ISL_18053114	2023-07-27
BG	XBB.1.5	South Korea	EPI_ISL_18117742	2023-07-27
BG	XBB.1.5	USA	EPI_ISL_18095754	2023-07-27
[truncated: 7,135 more rows]

## Sheet: Supplementary Table 5
D3
FG/BG/MT	Pango Lineage	Country	EPI_ISL	Date
MT	BA.2	India	EPI_ISL_15937070	2022
MT	BA.2	Hungary	EPI_ISL_17660509	2023
FG	JN.1	USA	EPI_ISL_18955125	2021-01-01
FG	JN.1	USA	EPI_ISL_18887369	2021-11-16
MT	BA.2	India	EPI_ISL_9720915	2022-01-06
MT	BA.2	Cameroon	EPI_ISL_15763780	2022-01-06
MT	BA.2	India	EPI_ISL_9512374	2022-01-09
MT	BA.2	India	EPI_ISL_14814434	2022-01-10
MT	BA.2	India	EPI_ISL_9779435	2022-01-11
MT	BA.2	Beijing	EPI_ISL_16557171	2022-01-12
MT	BA.2	Sweden	EPI_ISL_10610877	2022-01-13
MT	BA.2	Denmark	EPI_ISL_9011892	2022-01-14
MT	BA.2	India	EPI_ISL_9779446	2022-01-16
MT	BA.2	Canada	EPI_ISL_10235999	2022-01-16
MT	BA.2	India	EPI_ISL_9926230	2022-01-18
MT	BA.2	India	EPI_ISL_9926233	2022-01-18
MT	BA.2	England	EPI_ISL_10381743	2022-01-18
MT	BA.2	India	EPI_ISL_14814437	2022-01-18
MT	BA.2	India	EPI_ISL_14814438	2022-01-18
MT	BA.2	Germany	EPI_ISL_17316708	2022-01-18
MT	BA.2	India	EPI_ISL_12305706	2022-01-20
MT	BA.2	India	EPI_ISL_14814439	2022-01-20
MT	BA.2	Slovakia	EPI_ISL_9794941	2022-01-22
MT	BA.2	India	EPI_ISL_11023366	2022-01-22
MT	BA.2	France	EPI_ISL_9971151	2022-01-23
MT	BA.2	Germany	EPI_ISL_9862290	2022-01-24
MT	BA.2	India	EPI_ISL_14814442	2022-01-24
MT	BA.2	Germany	EPI_ISL_9862291	2022-01-25
MT	BA.2	Sweden	EPI_ISL_10607072	2022-01-25
MT	BA.2	Denmark	EPI_ISL_9567676	2022-01-26
MT	BA.2	France	EPI_ISL_10071331	2022-01-26
MT	BA.2	Sweden	EPI_ISL_10604594	2022-01-26
MT	BA.2	Russia	EPI_ISL_15886268	2022-01-26
MT	BA.2	Spain	EPI_ISL_9648257	2022-01-28
MT	BA.2	Germany	EPI_ISL_11601417	2022-01-28
MT	BA.2	England	EPI_ISL_9556722	2022-01-29
MT	BA.2	India	EPI_ISL_10748387	2022-01-29
MT	BA.2	Sweden	EPI_ISL_9622960	2022-01-30
MT	BA.2	Russia	EPI_ISL_15869912	2022-01-30
MT	BA.2	Canada	EPI_ISL_10321737	2022-01-31
MT	BA.2	Canada	EPI_ISL_10321747	2022-01-31
MT	BA.2	India	EPI_ISL_10762179	2022-01-31
MT	BA.2	Sweden	EPI_ISL_10152499	2022-02-01
MT	BA.2	India	EPI_ISL_13699646	2022-02-01
MT	BA.2	Russia	EPI_ISL_15875851	2022-02-01
MT	BA.2	Russia	EPI_ISL_15886015	2022-02-01
MT	BA.2	India	EPI_ISL_14147903	2022-02-02
MT	BA.2	India	EPI_ISL_14814443	2022-02-02
MT	BA.2	Germany	EPI_ISL_17319755	2022-02-02
MT	BA.2	India	EPI_ISL_10369398	2022-02-03
MT	BA.2	Sweden	EPI_ISL_17624922	2022-02-03
MT	BA.2	England	EPI_ISL_9789257	2022-02-04
MT	BA.2	India	EPI_ISL_10065810	2022-02-04
MT	BA.2	Belgium	EPI_ISL_9906124	2022-02-05
MT	BA.2	Denmark	EPI_ISL_9972574	2022-02-07
MT	BA.2	Germany	EPI_ISL_10241185	2022-02-07
MT	BA.2	India	EPI_ISL_10766136	2022-02-07
MT	BA.2	Latvia	EPI_ISL_13630532	2022-02-07
MT	BA.2	Latvia	EPI_ISL_13630998	2022-02-07
MT	BA.2	Russia	EPI_ISL_15868770	2022-02-07
MT	BA.2	Poland	EPI_ISL_9791134	2022-02-08
MT	BA.2	Sweden	EPI_ISL_10121197	2022-02-08
MT	BA.2	Germany	EPI_ISL_10290030	2022-02-08
MT	BA.2	Germany	EPI_ISL_10290068	2022-02-08
MT	BA.2	Sweden	EPI_ISL_10595905	2022-02-08
MT	BA.2	South_Africa	EPI_ISL_11105183	2022-02-08
MT	BA.2	England	EPI_ISL_9865770	2022-02-09
MT	BA.2	South_Africa	EPI_ISL_11105176	2022-02-09
MT	BA.2	Russia	EPI_ISL_15871700	2022-02-09
MT	BA.2	Denmark	EPI_ISL_10401727	2022-02-10
MT	BA.2	England	EPI_ISL_10450156	2022-02-10
MT	BA.2	Germany	EPI_ISL_11822452	2022-02-10
MT	BA.2	South_Africa	EPI_ISL_12006185	2022-02-10
MT	BA.2	South_Africa	EPI_ISL_12006194	2022-02-10
MT	BA.2	Russia	EPI_ISL_15873199	2022-02-10
MT	BA.2	Scotland	EPI_ISL_10051320	2022-02-11
MT	BA.2	Denmark	EPI_ISL_10063918	2022-02-11
MT	BA.2	England	EPI_ISL_10109168	2022-02-11
MT	BA.2	India	EPI_ISL_10675584	2022-02-11
MT	BA.2	Lithuania	EPI_ISL_10745278	2022-02-11
MT	BA.2	Germany	EPI_ISL_10749908	2022-02-11
MT	BA.2	France	EPI_ISL_10754308	2022-02-11
MT	BA.2	India	EPI_ISL_10801596	2022-02-11
MT	BA.2	Denmark	EPI_ISL_10095718	2022-02-12
MT	BA.2	Germany	EPI_ISL_10294968	2022-02-12
MT	BA.2	Russia	EPI_ISL_15874362	2022-02-13
MT	BA.2	England	EPI_ISL_10288734	2022-02-14
MT	BA.2	India	EPI_ISL_10524189	2022-02-14
MT	BA.2	Sweden	EPI_ISL_10592657	2022-02-14
MT	BA.2	Lithuania	EPI_ISL_10763297	2022-02-14
MT	BA.2	South_Africa	EPI_ISL_11105167	2022-02-14
MT	BA.2	South_Africa	EPI_ISL_11105172	2022-02-14
MT	BA.2	Canada	EPI_ISL_11366206	2022-02-14
MT	BA.2	Bulgaria	EPI_ISL_13180244	2022-02-14
FG	JN.1	USA	EPI_ISL_18887404	2022-02-15
MT	BA.2	Denmark	EPI_ISL_10208868	2022-02-15
MT	BA.2	England	EPI_ISL_10473885	2022-02-15
MT	BA.2	England	EPI_ISL_10576768	2022-02-15
MT	BA.2	England	EPI_ISL_10577491	2022-02-15
MT	BA.2	South_Africa	EPI_ISL_11111435	2022-02-15
MT	BA.2	Denmark	EPI_ISL_10207204	2022-02-16
MT	BA.2	England	EPI_ISL_10242829	2022-02-16
MT	BA.2	England	EPI_ISL_10245520	2022-02-16
MT	BA.2	India	EPI_ISL_10523851	2022-02-16
MT	BA.2	Austria	EPI_ISL_10985438	2022-02-16
MT	BA.2	Denmark	EPI_ISL_10257716	2022-02-17
MT	BA.2	England	EPI_ISL_10338121	2022-02-17
MT	BA.2	India	EPI_ISL_10523055	2022-02-17
MT	BA.2	England	EPI_ISL_10628274	2022-02-17
MT	BA.2	England	EPI_ISL_10670173	2022-02-17
MT	BA.2	England	EPI_ISL_10670505	2022-02-17
MT	BA.2	France	EPI_ISL_11223456	2022-02-17
MT	BA.2	England	EPI_ISL_11945817	2022-02-17
MT	BA.2	Israel	EPI_ISL_12092638	2022-02-17
MT	BA.2	Israel	EPI_ISL_12092645	2022-02-17
MT	BA.2	Bahrain	EPI_ISL_14086149	2022-02-17
MT	BA.2	Sweden	EPI_ISL_17642221	2022-02-17
MT	BA.2	England	EPI_ISL_10335522	2022-02-18
MT	BA.2	Denmark	EPI_ISL_10511060	2022-02-18
MT	BA.2	England	EPI_ISL_10535798	2022-02-18
MT	BA.2	England	EPI_ISL_10539651	2022-02-18
MT	BA.2	Denmark	EPI_ISL_10319591	2022-02-19
MT	BA.2	England	EPI_ISL_10741949	2022-02-19
MT	BA.2	England	EPI_ISL_10744881	2022-02-19
MT	BA.2	Israel	EPI_ISL_12092470	2022-02-19
MT	BA.2	Belgium	EPI_ISL_14628739	2022-02-19
MT	BA.2	England	EPI_ISL_10413646	2022-02-20
MT	BA.2	Sweden	EPI_ISL_10480059	2022-02-20
MT	BA.2	Switzerland	EPI_ISL_10706750	2022-02-20
MT	BA.2	Germany	EPI_ISL_10707728	2022-02-20
MT	BA.2	Croatia	EPI_ISL_11268627	2022-02-20
MT	BA.2	Germany	EPI_ISL_11467804	2022-02-20
MT	BA.2	India	EPI_ISL_11795922	2022-02-20
MT	BA.2	England	EPI_ISL_10415895	2022-02-21
MT	BA.2	England	EPI_ISL_10416734	2022-02-21
MT	BA.2	Portugal	EPI_ISL_10742027	2022-02-21
MT	BA.2	England	EPI_ISL_10744815	2022-02-21
MT	BA.2	Germany	EPI_ISL_10904258	2022-02-21
MT	BA.2	France	EPI_ISL_11082352	2022-02-21
MT	BA.2	South_Africa	EPI_ISL_11270295	2022-02-21
MT	BA.2	Belgium	EPI_ISL_13879009	2022-02-21
MT	BA.2	USA	EPI_ISL_10872835	2022-02-22
MT	BA.2	Germany	EPI_ISL_10904602	2022-02-22
MT	BA.2	Netherlands	EPI_ISL_10925480	2022-02-22
MT	BA.2	England	EPI_ISL_11003489	2022-02-22
MT	BA.2	England	EPI_ISL_11003496	2022-02-22
MT	BA.2	Wales	EPI_ISL_11007390	2022-02-22
MT	BA.2	South_Africa	EPI_ISL_11270045	2022-02-22
MT	BA.2	South_Africa	EPI_ISL_11542428	2022-02-22
MT	BA.2	Germany	EPI_ISL_12825748	2022-02-22
MT	BA.2	Germany	EPI_ISL_12732580	2022-02-23
MT	BA.2	Turkey	EPI_ISL_10795152	2022-02-24
MT	BA.2	Germany	EPI_ISL_10910666	2022-02-24
MT	BA.2	Germany	EPI_ISL_10916795	2022-02-24
MT	BA.2	Canada	EPI_ISL_11327534	2022-02-24
MT	BA.2	Canada	EPI_ISL_11565401	2022-02-24
MT	BA.2	Malaysia	EPI_ISL_12099641	2022-02-24
MT	BA.2	Denmark	EPI_ISL_10731188	2022-02-25
MT	BA.2	Germany	EPI_ISL_11467993	2022-02-25
MT	BA.2	Germany	EPI_ISL_11468000	2022-02-25
MT	BA.2	Germany	EPI_ISL_11591494	2022-02-25
MT	BA.2	Germany	EPI_ISL_12153320	2022-02-25
MT	BA.2	Russia	EPI_ISL_18029510	2022-02-25
MT	BA.2	Denmark	EPI_ISL_10677844	2022-02-26
MT	BA.2	England	EPI_ISL_10685400	2022-02-26
MT	BA.2	Switzerland	EPI_ISL_10926180	2022-02-26
MT	BA.2	Estonia	EPI_ISL_11287516	2022-02-26
MT	BA.2	Germany	EPI_ISL_11461794	2022-02-26
MT	BA.2	Russia	EPI_ISL_15872459	2022-02-26
MT	BA.2	France	EPI_ISL_10794680	2022-02-27
MT	BA.2	England	EPI_ISL_10725366	2022-02-28
MT	BA.2	Denmark	EPI_ISL_10730926	2022-02-28
MT	BA.2	England	EPI_ISL_10735941	2022-02-28
MT	BA.2	England	EPI_ISL_10735956	2022-02-28
MT	BA.2	England	EPI_ISL_10736068	2022-02-28
MT	BA.2	England	EPI_ISL_10736193	2022-02-28
MT	BA.2	England	EPI_ISL_10736854	2022-02-28
MT	BA.2	Israel	EPI_ISL_10816605	2022-02-28
MT	BA.2	England	EPI_ISL_11059886	2022-02-28
MT	BA.2	South_Korea	EPI_ISL_11405687	2022-02-28
MT	BA.2	South_Korea	EPI_ISL_11405688	2022-02-28
MT	BA.2	Austria	EPI_ISL_12317275	2022-02-28
MT	BA.2	Sweden	EPI_ISL_12409058	2022-02-28
MT	BA.2	Sweden	EPI_ISL_12409672	2022-02-28
MT	BA.2	Luxembourg	EPI_ISL_12440945	2022-02-28
MT	BA.2	India	EPI_ISL_13499606	2022-02-28
MT	BA.2	England	EPI_ISL_10735862	2022-03-01
MT	BA.2	Denmark	EPI_ISL_10813144	2022-03-01
MT	BA.2	England	EPI_ISL_10881831	2022-03-01
MT	BA.2	Sweden	EPI_ISL_11094154	2022-03-01
MT	BA.2	Germany	EPI_ISL_11475044	2022-03-01
MT	BA.2	Germany	EPI_ISL_13141515	2022-03-01
MT	BA.2	Scotland	EPI_ISL_10858025	2022-03-02
MT	BA.2	Denmark	EPI_ISL_10942095	2022-03-02
MT	BA.2	Germany	EPI_ISL_11455395	2022-03-02
MT	BA.2	Turkey	EPI_ISL_11575166	2022-03-02
MT	BA.2	South_Africa	EPI_ISL_11825788	2022-03-02
MT	BA.2	Sweden	EPI_ISL_12409044	2022-03-02
MT	BA.2	England	EPI_ISL_10845784	2022-03-03
MT	BA.2	Denmark	EPI_ISL_10892119	2022-03-03
MT	BA.2	Spain	EPI_ISL_10903031	2022-03-03
MT	BA.2	England	EPI_ISL_10964854	2022-03-03
MT	BA.2	Germany	EPI_ISL_11455127	2022-03-03
MT	BA.2	Germany	EPI_ISL_11643316	2022-03-03
MT	BA.2	Germany	EPI_ISL_11644347	2022-03-03
MT	BA.2	Russia	EPI_ISL_15886224	2022-03-03
MT	BA.2	England	EPI_ISL_10925231	2022-03-04
MT	BA.2	England	EPI_ISL_10931386	2022-03-04
MT	BA.2	USA	EPI_ISL_11388905	2022-03-04
MT	BA.2	Germany	EPI_ISL_11455410	2022-03-04
MT	BA.2	Germany	EPI_ISL_11613698	2022-03-04
MT	BA.2	England	EPI_ISL_12103831	2022-03-04
MT	BA.2	Cyprus	EPI_ISL_18478973	2022-03-04
MT	BA.2	Denmark	EPI_ISL_10892006	2022-03-05
MT	BA.2	Denmark	EPI_ISL_10893139	2022-03-05
MT	BA.2	England	EPI_ISL_10963359	2022-03-05
MT	BA.2	England	EPI_ISL_10964609	2022-03-05
MT	BA.2	England	EPI_ISL_10971590	2022-03-05
MT	BA.2	Denmark	EPI_ISL_10983471	2022-03-05
MT	BA.2	Denmark	EPI_ISL_10942518	2022-03-06
MT	BA.2	England	EPI_ISL_10971175	2022-03-06
MT	BA.2	England	EPI_ISL_10972841	2022-03-07
MT	BA.2	England	EPI_ISL_10972910	2022-03-07
MT	BA.2	England	EPI_ISL_10976777	2022-03-07
MT	BA.2	England	EPI_ISL_10991784	2022-03-07
MT	BA.2	Denmark	EPI_ISL_11024880	2022-03-07
MT	BA.2	Denmark	EPI_ISL_11025648	2022-03-07
MT	BA.2	Denmark	EPI_ISL_11028707	2022-03-07
MT	BA.2	Denmark	EPI_ISL_11028775	2022-03-07
MT	BA.2	England	EPI_ISL_11031524	2022-03-07
MT	BA.2	England	EPI_ISL_11039860	2022-03-07
MT	BA.2	Scotland	EPI_ISL_11099006	2022-03-07
MT	BA.2	Denmark	EPI_ISL_11120076	2022-03-07
MT	BA.2	England	EPI_ISL_11314679	2022-03-07
MT	BA.2	Wales	EPI_ISL_11322086	2022-03-07
MT	BA.2	England	EPI_ISL_11478635	2022-03-07
MT	BA.2	France	EPI_ISL_12135394	2022-03-07
MT	BA.2	France	EPI_ISL_13450073	2022-03-07
MT	BA.2	England	EPI_ISL_10990139	2022-03-08
MT	BA.2	England	EPI_ISL_10990216	2022-03-08
MT	BA.2	England	EPI_ISL_11031178	2022-03-08
MT	BA.2	England	EPI_ISL_11189917	2022-03-08
MT	BA.2	Austria	EPI_ISL_11325380	2022-03-08
MT	BA.2	Denmark	EPI_ISL_11381677	2022-03-08
MT	BA.2	Turkey	EPI_ISL_11832864	2022-03-08
MT	BA.2	Turkey	EPI_ISL_11832940	2022-03-08
MT	BA.2	Indonesia	EPI_ISL_12559839	2022-03-08
MT	BA.2	Austria	EPI_ISL_12896425	2022-03-08
MT	BA.2	England	EPI_ISL_11032319	2022-03-09
MT	BA.2	England	EPI_ISL_11032680	2022-03-09
MT	BA.2	England	EPI_ISL_11076076	2022-03-09
MT	BA.2	England	EPI_ISL_11079462	2022-03-09
MT	BA.2	England	EPI_ISL_11079658	2022-03-09
MT	BA.2	England	EPI_ISL_11079722	2022-03-09
MT	BA.2	Wales	EPI_ISL_11085402	2022-03-09
MT	BA.2	Scotland	EPI_ISL_11090553	2022-03-09
MT	BA.2	England	EPI_ISL_11120723	2022-03-09
MT	BA.2	Denmark	EPI_ISL_11158045	2022-03-09
MT	BA.2	England	EPI_ISL_11225908	2022-03-09
MT	BA.2	Denmark	EPI_ISL_11287237	2022-03-09
MT	BA.2	Czech_Republic	EPI_ISL_11327078	2022-03-09
MT	BA.2	Germany	EPI_ISL_11617278	2022-03-09
MT	BA.2	Germany	EPI_ISL_11667638	2022-03-09
MT	BA.2	Turkey	EPI_ISL_11881266	2022-03-09
MT	BA.2	USA	EPI_ISL_12000679	2022-03-09
MT	BA.2	Spain	EPI_ISL_12057238	2022-03-09
MT	BA.2	Belgium	EPI_ISL_14630409	2022-03-09
MT	BA.2	Belgium	EPI_ISL_14630413	2022-03-09
MT	BA.2	Denmark	EPI_ISL_11065502	2022-03-10
MT	BA.2	Denmark	EPI_ISL_11066555	2022-03-10
MT	BA.2	England	EPI_ISL_11076772	2022-03-10
MT	BA.2	England	EPI_ISL_11077928	2022-03-10
MT	BA.2	Denmark	EPI_ISL_11113091	2022-03-10
MT	BA.2	England	EPI_ISL_11120644	2022-03-10
MT	BA.2	England	EPI_ISL_11120942	2022-03-10
MT	BA.2	England	EPI_ISL_11121881	2022-03-10
MT	BA.2	Poland	EPI_ISL_11234461	2022-03-10
MT	BA.2	Germany	EPI_ISL_11672943	2022-03-10
MT	BA.2	Thailand	EPI_ISL_11871284	2022-03-10
MT	BA.2	Israel	EPI_ISL_12094982	2022-03-10
MT	BA.2	England	EPI_ISL_11150282	2022-03-11
MT	BA.2	Switzerland	EPI_ISL_11170034	2022-03-11
MT	BA.2	England	EPI_ISL_11182869	2022-03-11
MT	BA.2	England	EPI_ISL_11183479	2022-03-11
MT	BA.2	England	EPI_ISL_11183833	2022-03-11
MT	BA.2	England	EPI_ISL_11184238	2022-03-11
MT	BA.2	Denmark	EPI_ISL_11345266	2022-03-11
MT	BA.2	Germany	EPI_ISL_11614637	2022-03-11
MT	BA.2	England	EPI_ISL_11829448	2022-03-11
MT	BA.2	India	EPI_ISL_11881810	2022-03-11
MT	BA.2	Norway	EPI_ISL_11886789	2022-03-11
MT	BA.2	Malaysia	EPI_ISL_18821480	2022-03-11
MT	BA.2	Malaysia	EPI_ISL_18821483	2022-03-11
MT	BA.2	Malaysia	EPI_ISL_18821484	2022-03-11
MT	BA.2	Malaysia	EPI_ISL_18821485	2022-03-11
MT	BA.2	Malaysia	EPI_ISL_18821486	2022-03-11
MT	BA.2	Malaysia	EPI_ISL_18821487	2022-03-11
MT	BA.2	Malaysia	EPI_ISL_18821489	2022-03-11
MT	BA.2	Malaysia	EPI_ISL_18821490	2022-03-11
MT	BA.2	Malaysia	EPI_ISL_18821491	2022-03-11
MT	BA.2	Malaysia	EPI_ISL_18821492	2022-03-11
MT	BA.2	Malaysia	EPI_ISL_18821494	2022-03-11
MT	BA.2	Malaysia	EPI_ISL_18821540	2022-03-11
MT	BA.2	Malaysia	EPI_ISL_18821546	2022-03-11
MT	BA.2	Malaysia	EPI_ISL_18821549	2022-03-11
MT	BA.2	England	EPI_ISL_11182104	2022-03-12
MT	BA.2	England	EPI_ISL_11185488	2022-03-12
MT	BA.2	England	EPI_ISL_11186183	2022-03-12
MT	BA.2	England	EPI_ISL_11186321	2022-03-12
MT	BA.2	England	EPI_ISL_11186645	2022-03-12
MT	BA.2	Scotland	EPI_ISL_11187366	2022-03-12
MT	BA.2	England	EPI_ISL_11194314	2022-03-12
MT	BA.2	England	EPI_ISL_11274795	2022-03-12
MT	BA.2	England	EPI_ISL_11274951	2022-03-12
MT	BA.2	Scotland	EPI_ISL_11286608	2022-03-12
MT	BA.2	USA	EPI_ISL_11439233	2022-03-12
MT	BA.2	Germany	EPI_ISL_11478611	2022-03-12
MT	BA.2	England	EPI_ISL_11492003	2022-03-12
MT	BA.2	Sweden	EPI_ISL_11845292	2022-03-12
MT	BA.2	Slovakia	EPI_ISL_11881036	2022-03-12
MT	BA.2	Slovakia	EPI_ISL_11881037	2022-03-12
MT	BA.2	Slovakia	EPI_ISL_11881038	2022-03-12
MT	BA.2	Northern_Ireland	EPI_ISL_12581045	2022-03-12
MT	BA.2	Denmark	EPI_ISL_11158367	2022-03-13
MT	BA.2	England	EPI_ISL_11180875	2022-03-13
MT	BA.2	England	EPI_ISL_11188728	2022-03-13
MT	BA.2	England	EPI_ISL_11195584	2022-03-13
MT	BA.2	England	EPI_ISL_11196002	2022-03-13
MT	BA.2	England	EPI_ISL_11196024	2022-03-13
MT	BA.2	England	EPI_ISL_11198929	2022-03-13
MT	BA.2	Denmark	EPI_ISL_11208563	2022-03-13
MT	BA.2	Denmark	EPI_ISL_11210157	2022-03-13
MT	BA.2	England	EPI_ISL_11274311	2022-03-13
MT	BA.2	USA	EPI_ISL_12143280	2022-03-13
MT	BA.2	England	EPI_ISL_12445633	2022-03-13
MT	BA.2	Belgium	EPI_ISL_14668024	2022-03-13
MT	BA.2	England	EPI_ISL_11195035	2022-03-14
MT	BA.2	England	EPI_ISL_11212767	2022-03-14
MT	BA.2	England	EPI_ISL_11215186	2022-03-14
MT	BA.2	England	EPI_ISL_11215335	2022-03-14
MT	BA.2	England	EPI_ISL_11216513	2022-03-14
MT	BA.2	Scotland	EPI_ISL_11273321	2022-03-14
MT	BA.2	England	EPI_ISL_11278739	2022-03-14
MT	BA.2	Denmark	EPI_ISL_11280928	2022-03-14
MT	BA.2	Scotland	EPI_ISL_11282718	2022-03-14
MT	BA.2	Scotland	EPI_ISL_11282734	2022-03-14
MT	BA.2	Denmark	EPI_ISL_11283744	2022-03-14
MT	BA.2	Scotland	EPI_ISL_11286145	2022-03-14
MT	BA.2	USA	EPI_ISL_11386520	2022-03-14
MT	BA.2	Germany	EPI_ISL_11478892	2022-03-14
MT	BA.2	Germany	EPI_ISL_11480625	2022-03-14
MT	BA.2	England	EPI_ISL_11558703	2022-03-14
MT	BA.2	Netherlands	EPI_ISL_11659412	2022-03-14
MT	BA.2	England	EPI_ISL_11744121	2022-03-14
MT	BA.2	Switzerland	EPI_ISL_11760380	2022-03-14
MT	BA.2	Spain	EPI_ISL_12397865	2022-03-14
MT	BA.2	France	EPI_ISL_12421888	2022-03-14
MT	BA.2	Scotland	EPI_ISL_11269601	2022-03-15
MT	BA.2	Denmark	EPI_ISL_11276361	2022-03-15
MT	BA.2	Denmark	EPI_ISL_11279731	2022-03-15
MT	BA.2	Denmark	EPI_ISL_11284945	2022-03-15
MT	BA.2	Denmark	EPI_ISL_11285016	2022-03-15
MT	BA.2	England	EPI_ISL_11303807	2022-03-15
MT	BA.2	Germany	EPI_ISL_11618864	2022-03-15
MT	BA.2	Germany	EPI_ISL_11653232	2022-03-15
MT	BA.2	England	EPI_ISL_11747302	2022-03-15
MT	BA.2	Israel	EPI_ISL_11844992	2022-03-15
MT	BA.2	Israel	EPI_ISL_11845067	2022-03-15
MT	BA.2	South_Africa	EPI_ISL_11867460	2022-03-15
MT	BA.2	South_Africa	EPI_ISL_11867477	2022-03-15
MT	BA.2	Romania	EPI_ISL_12075886	2022-03-15
MT	BA.2	Denmark	EPI_ISL_11281224	2022-03-16
MT	BA.2	England	EPI_ISL_11303789	2022-03-16
MT	BA.2	Scotland	EPI_ISL_11306607	2022-03-16
MT	BA.2	England	EPI_ISL_11338588	2022-03-16
MT	BA.2	England	EPI_ISL_11338875	2022-03-16
MT	BA.2	England	EPI_ISL_11341621	2022-03-16
MT	BA.2	Denmark	EPI_ISL_11346842	2022-03-16
MT	BA.2	England	EPI_ISL_11388500	2022-03-16
MT	BA.2	England	EPI_ISL_11394490	2022-03-16
MT	BA.2	Denmark	EPI_ISL_11517079	2022-03-16
MT	BA.2	Germany	EPI_ISL_11620741	2022-03-16
MT	BA.2	England	EPI_ISL_11661766	2022-03-16
MT	BA.2	Israel	EPI_ISL_11848056	2022-03-16
MT	BA.2	Israel	EPI_ISL_11848201	2022-03-16
MT	BA.2	England	EPI_ISL_12103835	2022-03-16
MT	BA.2	Germany	EPI_ISL_12363815	2022-03-16
MT	BA.2	Belgium	EPI_ISL_11248851	2022-03-17
MT	BA.2	Belgium	EPI_ISL_11248852	2022-03-17
MT	BA.2	Denmark	EPI_ISL_11318549	2022-03-17
MT	BA.2	England	EPI_ISL_11335357	2022-03-17
MT	BA.2	England	EPI_ISL_11335537	2022-03-17
MT	BA.2	England	EPI_ISL_11387607	2022-03-17
MT	BA.2	England	EPI_ISL_11390807	2022-03-17
MT	BA.2	England	EPI_ISL_11391151	2022-03-17
MT	BA.2	England	EPI_ISL_11394512	2022-03-17
MT	BA.2	England	EPI_ISL_11395827	2022-03-17
MT	BA.2	Scotland	EPI_ISL_11399646	2022-03-17
MT	BA.2	USA	EPI_ISL_11527052	2022-03-17
MT	BA.2	Wales	EPI_ISL_11740955	2022-03-17
MT	BA.2	Israel	EPI_ISL_11850433	2022-03-17
MT	BA.2	Israel	EPI_ISL_11861754	2022-03-17
MT	BA.2	Germany	EPI_ISL_12025516	2022-03-17
MT	BA.2	Norway	EPI_ISL_12359334	2022-03-17
MT	BA.2	Chile	EPI_ISL_12740155	2022-03-17
MT	BA.2	Russia	EPI_ISL_15874294	2022-03-17
MT	BA.2	Russia	EPI_ISL_15875939	2022-03-17
MT	BA.2	England	EPI_ISL_11334355	2022-03-18
MT	BA.2	England	EPI_ISL_11336620	2022-03-18
MT	BA.2	Belgium	EPI_ISL_11351558	2022-03-18
MT	BA.2	England	EPI_ISL_11395223	2022-03-18
MT	BA.2	England	EPI_ISL_11418709	2022-03-18
MT	BA.2	England	EPI_ISL_11420963	2022-03-18
MT	BA.2	England	EPI_ISL_11422160	2022-03-18
MT	BA.2	England	EPI_ISL_11433411	2022-03-18
MT	BA.2	Germany	EPI_ISL_11666310	2022-03-18
MT	BA.2	Germany	EPI_ISL_11817217	2022-03-18
MT	BA.2	England	EPI_ISL_11828920	2022-03-18
MT	BA.2	Israel	EPI_ISL_11850657	2022-03-18
MT	BA.2	Israel	EPI_ISL_11850658	2022-03-18
MT	BA.2	England	EPI_ISL_11960167	2022-03-18
MT	BA.2	USA	EPI_ISL_12652458	2022-03-18
MT	BA.2	Belgium	EPI_ISL_14631629	2022-03-18
MT	BA.2	Austria	EPI_ISL_11348245	2022-03-19
MT	BA.2	England	EPI_ISL_11390177	2022-03-19
MT	BA.2	England	EPI_ISL_11391650	2022-03-19
MT	BA.2	England	EPI_ISL_11416629	2022-03-19
MT	BA.2	England	EPI_ISL_11418225	2022-03-19
MT	BA.2	England	EPI_ISL_11421484	2022-03-19
MT	BA.2	England	EPI_ISL_11422795	2022-03-19
MT	BA.2	England	EPI_ISL_11430253	2022-03-19
MT	BA.2	Scotland	EPI_ISL_11555364	2022-03-19
MT	BA.2	Northern_Ireland	EPI_ISL_11740551	2022-03-19
MT	BA.2	Northern_Ireland	EPI_ISL_11740689	2022-03-19
MT	BA.2	Canada	EPI_ISL_11996287	2022-03-19
MT	BA.2	Germany	EPI_ISL_12016033	2022-03-19
MT	BA.2	Germany	EPI_ISL_12027067	2022-03-19
MT	BA.2	Czech_Republic	EPI_ISL_12157012	2022-03-19
MT	BA.2	Norway	EPI_ISL_12359544	2022-03-19
MT	BA.2	England	EPI_ISL_11416653	2022-03-20
MT	BA.2	England	EPI_ISL_11418976	2022-03-20
MT	BA.2	Denmark	EPI_ISL_11442485	2022-03-20
MT	BA.2	Denmark	EPI_ISL_11443480	2022-03-20
MT	BA.2	Denmark	EPI_ISL_11444762	2022-03-20
MT	BA.2	England	EPI_ISL_11447156	2022-03-20
MT	BA.2	England	EPI_ISL_11447827	2022-03-20
MT	BA.2	USA	EPI_ISL_11530958	2022-03-20
MT	BA.2	England	EPI_ISL_11746052	2022-03-20
MT	BA.2	Wales	EPI_ISL_11836208	2022-03-20
MT	BA.2	Netherlands	EPI_ISL_11840210	2022-03-20
MT	BA.2	Israel	EPI_ISL_11853104	2022-03-20
MT	BA.2	Belgium	EPI_ISL_12006048	2022-03-20
MT	BA.2	Germany	EPI_ISL_12185828	2022-03-20
MT	BA.2	Germany	EPI_ISL_12186459	2022-03-20
MT	BA.2	England	EPI_ISL_11428766	2022-03-21
MT	BA.2	England	EPI_ISL_11447562	2022-03-21
MT	BA.2	England	EPI_ISL_11512597	2022-03-21
MT	BA.2	England	EPI_ISL_11513805	2022-03-21
MT	BA.2	Denmark	EPI_ISL_11514771	2022-03-21
MT	BA.2	England	EPI_ISL_11552943	2022-03-21
MT	BA.2	England	EPI_ISL_11553004	2022-03-21
MT	BA.2	England	EPI_ISL_11597050	2022-03-21
MT	BA.2	France	EPI_ISL_11633445	2022-03-21
MT	BA.2	England	EPI_ISL_11650244	2022-03-21
MT	BA.2	Germany	EPI_ISL_11664275	2022-03-21
MT	BA.2	Spain	EPI_ISL_11750242	2022-03-21
MT	BA.2	England	EPI_ISL_11829856	2022-03-21
MT	BA.2	England	EPI_ISL_11829868	2022-03-21
MT	BA.2	Belgium	EPI_ISL_11839588	2022-03-21
MT	BA.2	Belgium	EPI_ISL_11839589	2022-03-21
MT	BA.2	Switzerland	EPI_ISL_11890096	2022-03-21
MT	BA.2	France	EPI_ISL_12083163	2022-03-21
MT	BA.2	France	EPI_ISL_12131070	2022-03-21
MT	BA.2	Austria	EPI_ISL_12144809	2022-03-21
MT	BA.2	France	EPI_ISL_12269326	2022-03-21
MT	BA.2	France	EPI_ISL_12270642	2022-03-21
MT	BA.2	France	EPI_ISL_12410883	2022-03-21
MT	BA.2	France	EPI_ISL_12422279	2022-03-21
MT	BA.2	France	EPI_ISL_12685902	2022-03-21
MT	BA.2	France	EPI_ISL_12686018	2022-03-21
MT	BA.2	Chile	EPI_ISL_12695345	2022-03-21
MT	BA.2	France	EPI_ISL_12789101	2022-03-21
MT	BA.2	Germany	EPI_ISL_13268710	2022-03-21
MT	BA.2	France	EPI_ISL_13349920	2022-03-21
MT	BA.2	Russia	EPI_ISL_15873221	2022-03-21
MT	BA.2	Canary_Islands	EPI_ISL_16282414	2022-03-21
MT	BA.2	England	EPI_ISL_18018401	2022-03-21
MT	BA.2	England	EPI_ISL_11508651	2022-03-22
MT	BA.2	England	EPI_ISL_11511843	2022-03-22
MT	BA.2	England	EPI_ISL_11546540	2022-03-22
MT	BA.2	England	EPI_ISL_11546949	2022-03-22
MT	BA.2	England	EPI_ISL_11546957	2022-03-22
MT	BA.2	England	EPI_ISL_11547060	2022-03-22
MT	BA.2	England	EPI_ISL_11547283	2022-03-22
MT	BA.2	England	EPI_ISL_11551299	2022-03-22
MT	BA.2	USA	EPI_ISL_11681554	2022-03-22
MT	BA.2	USA	EPI_ISL_11696710	2022-03-22
MT	BA.2	England	EPI_ISL_11747782	2022-03-22
MT	BA.2	Denmark	EPI_ISL_11781977	2022-03-22
MT	BA.2	Denmark	EPI_ISL_11787000	2022-03-22
MT	BA.2	Denmark	EPI_ISL_11788380	2022-03-22
MT	BA.2	Germany	EPI_ISL_11820394	2022-03-22
MT	BA.2	Germany	EPI_ISL_11821790	2022-03-22
MT	BA.2	England	EPI_ISL_11829835	2022-03-22
MT	BA.2	Wales	EPI_ISL_12031516	2022-03-22
MT	BA.2	Scotland	EPI_ISL_12042977	2022-03-22
MT	BA.2	Netherlands	EPI_ISL_12082276	2022-03-22
MT	BA.2	Germany	EPI_ISL_12194222	2022-03-22
MT	BA.2	USA	EPI_ISL_12254174	2022-03-22
MT	BA.2	Norway	EPI_ISL_12360953	2022-03-22
MT	BA.2	India	EPI_ISL_12362100	2022-03-22
MT	BA.2	Germany	EPI_ISL_13035015	2022-03-22
MT	BA.2	Germany	EPI_ISL_13268542	2022-03-22
MT	BA.2	England	EPI_ISL_11545542	2022-03-23
MT	BA.2	Denmark	EPI_ISL_11550078	2022-03-23
MT	BA.2	England	EPI_ISL_11553126	2022-03-23
MT	BA.2	England	EPI_ISL_11594412	2022-03-23
MT	BA.2	England	EPI_ISL_11594807	2022-03-23
MT	BA.2	England	EPI_ISL_11598905	2022-03-23
MT	BA.2	England	EPI_ISL_11599547	2022-03-23
MT	BA.2	England	EPI_ISL_11603963	2022-03-23
MT	BA.2	Wales	EPI_ISL_11605560	2022-03-23
MT	BA.2	England	EPI_ISL_11654083	2022-03-23
MT	BA.2	England	EPI_ISL_11654312	2022-03-23
MT	BA.2	USA	EPI_ISL_11740857	2022-03-23
MT	BA.2	Canada	EPI_ISL_11763225	2022-03-23
MT	BA.2	France	EPI_ISL_11868827	2022-03-23
MT	BA.2	USA	EPI_ISL_11951423	2022-03-23
MT	BA.2	England	EPI_ISL_11959837	2022-03-23
MT	BA.2	Wales	EPI_ISL_12032363	2022-03-23
MT	BA.2	England	EPI_ISL_12043589	2022-03-23
MT	BA.2	Canada	EPI_ISL_12382754	2022-03-23
MT	BA.2	England	EPI_ISL_12403610	2022-03-23
MT	BA.2	Latvia	EPI_ISL_13627897	2022-03-23
MT	BA.2	Russia	EPI_ISL_15877519	2022-03-23
MT	BA.2	Russia	EPI_ISL_15886465	2022-03-23
MT	BA.2	England	EPI_ISL_11545412	2022-03-24
MT	BA.2	Denmark	EPI_ISL_11553770	2022-03-24
MT	BA.2	England	EPI_ISL_11589519	2022-03-24
MT	BA.2	England	EPI_ISL_11594593	2022-03-24
MT	BA.2	England	EPI_ISL_11595674	2022-03-24
MT	BA.2	England	EPI_ISL_11637555	2022-03-24
MT	BA.2	England	EPI_ISL_11640370	2022-03-24
MT	BA.2	England	EPI_ISL_11640678	2022-03-24
MT	BA.2	England	EPI_ISL_11644654	2022-03-24
MT	BA.2	England	EPI_ISL_11645029	2022-03-24
MT	BA.2	Denmark	EPI_ISL_11787349	2022-03-24
MT	BA.2	England	EPI_ISL_12076922	2022-03-24
MT	BA.2	England	EPI_ISL_12102969	2022-03-24
MT	BA.2	USA	EPI_ISL_12148534	2022-03-24
MT	BA.2	France	EPI_ISL_12156093	2022-03-24
MT	BA.2	South_Korea	EPI_ISL_12249995	2022-03-24
MT	BA.2	England	EPI_ISL_12775517	2022-03-24
MT	BA.2	England	EPI_ISL_12776771	2022-03-24
MT	BA.2	England	EPI_ISL_12776953	2022-03-24
MT	BA.2	Belgium	EPI_ISL_14671250	2022-03-24
MT	BA.2	England	EPI_ISL_11590407	2022-03-25
MT	BA.2	England	EPI_ISL_11590471	2022-03-25
MT	BA.2	England	EPI_ISL_11591334	2022-03-25
MT	BA.2	England	EPI_ISL_11592066	2022-03-25
MT	BA.2	England	EPI_ISL_11649534	2022-03-25
MT	BA.2	Scotland	EPI_ISL_11693464	2022-03-25
MT	BA.2	England	EPI_ISL_11698798	2022-03-25
MT	BA.2	England	EPI_ISL_11698818	2022-03-25
MT	BA.2	England	EPI_ISL_11701295	2022-03-25
MT	BA.2	Israel	EPI_ISL_11969817	2022-03-25
MT	BA.2	England	EPI_ISL_11996787	2022-03-25
MT	BA.2	Poland	EPI_ISL_12008555	2022-03-25
MT	BA.2	Wales	EPI_ISL_12032413	2022-03-25
MT	BA.2	Germany	EPI_ISL_12194316	2022-03-25
MT	BA.2	Spain	EPI_ISL_12227651	2022-03-25
MT	BA.2	Germany	EPI_ISL_13268559	2022-03-25
MT	BA.2	Latvia	EPI_ISL_13631349	2022-03-25
MT	BA.2	Germany	EPI_ISL_14136022	2022-03-25
MT	BA.2	Finland	EPI_ISL_15984666	2022-03-25
FG	JN.1	USA	EPI_ISL_18887458	2022-03-26
MT	BA.2	Denmark	EPI_ISL_11583812	2022-03-26
MT	BA.2	Denmark	EPI_ISL_11645922	2022-03-26
MT	BA.2	Denmark	EPI_ISL_11651334	2022-03-26
MT	BA.2	England	EPI_ISL_11689284	2022-03-26
MT	BA.2	England	EPI_ISL_11690117	2022-03-26
MT	BA.2	Scotland	EPI_ISL_11694127	2022-03-26
MT	BA.2	Scotland	EPI_ISL_11694497	2022-03-26
MT	BA.2	England	EPI_ISL_11698512	2022-03-26
MT	BA.2	England	EPI_ISL_11702193	2022-03-26
MT	BA.2	England	EPI_ISL_11702701	2022-03-26
MT	BA.2	Denmark	EPI_ISL_11720634	2022-03-26
MT	BA.2	England	EPI_ISL_11728630	2022-03-26
MT	BA.2	Germany	EPI_ISL_11961768	2022-03-26
MT	BA.2	Israel	EPI_ISL_11969864	2022-03-26
MT	BA.2	Israel	EPI_ISL_11969899	2022-03-26
MT	BA.2	England	EPI_ISL_11996622	2022-03-26
MT	BA.2	England	EPI_ISL_12029242	2022-03-26
MT	BA.2	USA	EPI_ISL_12034763	2022-03-26
MT	BA.2	England	EPI_ISL_12043615	2022-03-26
MT	BA.2	Israel	EPI_ISL_12091405	2022-03-26
MT	BA.2	Israel	EPI_ISL_12091962	2022-03-26
MT	BA.2	Northern_Ireland	EPI_ISL_12203694	2022-03-26
MT	BA.2	England	EPI_ISL_12777685	2022-03-26
MT	BA.2	Russia	EPI_ISL_15874448	2022-03-26
MT	BA.2	Denmark	EPI_ISL_11646000	2022-03-27
MT	BA.2	England	EPI_ISL_11690279	2022-03-27
MT	BA.2	England	EPI_ISL_11698622	2022-03-27
MT	BA.2	England	EPI_ISL_11703285	2022-03-27
MT	BA.2	Denmark	EPI_ISL_11721299	2022-03-27
MT	BA.2	Denmark	EPI_ISL_11723334	2022-03-27
MT	BA.2	England	EPI_ISL_11726606	2022-03-27
MT	BA.2	England	EPI_ISL_11728911	2022-03-27
MT	BA.2	England	EPI_ISL_11730916	2022-03-27
MT	BA.2	Scotland	EPI_ISL_11774809	2022-03-27
MT	BA.2	Scotland	EPI_ISL_11775428	2022-03-27
MT	BA.2	Germany	EPI_ISL_11820691	2022-03-27
MT	BA.2	Israel	EPI_ISL_11860822	2022-03-27
MT	BA.2	Wales	EPI_ISL_12031968	2022-03-27
MT	BA.2	USA	EPI_ISL_12148741	2022-03-27
MT	BA.2	Spain	EPI_ISL_12350636	2022-03-27
MT	BA.2	Norway	EPI_ISL_12439490	2022-03-27
MT	BA.2	South_Korea	EPI_ISL_13022924	2022-03-27
MT	BA.2	Denmark	EPI_ISL_11721559	2022-03-28
MT	BA.2	Denmark	EPI_ISL_11721733	2022-03-28
MT	BA.2	England	EPI_ISL_11726241	2022-03-28
MT	BA.2	England	EPI_ISL_11729629	2022-03-28
MT	BA.2	England	EPI_ISL_11730100	2022-03-28
MT	BA.2	England	EPI_ISL_11730688	2022-03-28
MT	BA.2	England	EPI_ISL_11730894	2022-03-28
MT	BA.2	England	EPI_ISL_11730921	2022-03-28
MT	BA.2	England	EPI_ISL_11731074	2022-03-28
MT	BA.2	Scotland	EPI_ISL_11770331	2022-03-28
MT	BA.2	Scotland	EPI_ISL_11773345	2022-03-28
MT	BA.2	Scotland	EPI_ISL_11773775	2022-03-28
MT	BA.2	Denmark	EPI_ISL_11782620	2022-03-28
MT	BA.2	Denmark	EPI_ISL_11785828	2022-03-28
MT	BA.2	France	EPI_ISL_12023134	2022-03-28
MT	BA.2	England	EPI_ISL_12075757	2022-03-28
MT	BA.2	England	EPI_ISL_12076034	2022-03-28
MT	BA.2	England	EPI_ISL_12104794	2022-03-28
MT	BA.2	England	EPI_ISL_12106102	2022-03-28
MT	BA.2	France	EPI_ISL_12140285	2022-03-28
MT	BA.2	Martinique	EPI_ISL_12157622	2022-03-28
MT	BA.2	France	EPI_ISL_12157697	2022-03-28
MT	BA.2	France	EPI_ISL_12157790	2022-03-28
MT	BA.2	France	EPI_ISL_12157792	2022-03-28
MT	BA.2	England	EPI_ISL_12205232	2022-03-28
MT	BA.2	Scotland	EPI_ISL_12221202	2022-03-28
MT	BA.2	France	EPI_ISL_12248913	2022-03-28
MT	BA.2	Scotland	EPI_ISL_12254922	2022-03-28
MT	BA.2	France	EPI_ISL_12270901	2022-03-28
MT	BA.2	France	EPI_ISL_12412782	2022-03-28
MT	BA.2	Ireland	EPI_ISL_12534426	2022-03-28
MT	BA.2	France	EPI_ISL_12556671	2022-03-28
MT	BA.2	France	EPI_ISL_12789063	2022-03-28
MT	BA.2	South_Korea	EPI_ISL_13023032	2022-03-28
MT	BA.2	France	EPI_ISL_15613607	2022-03-28
MT	BA.2	Scotland	EPI_ISL_18021272	2022-03-28
MT	BA.2	England	EPI_ISL_18881157	2022-03-28
MT	BA.2	Slovakia	EPI_ISL_11906318	2022-03-29
MT	BA.2	Denmark	EPI_ISL_11913136	2022-03-29
MT	BA.2	Portugal	EPI_ISL_11941746	2022-03-29
MT	BA.2	Portugal	EPI_ISL_11942072	2022-03-29
MT	BA.2	Portugal	EPI_ISL_11942076	2022-03-29
MT	BA.2	France	EPI_ISL_11997971	2022-03-29
MT	BA.2	France	EPI_ISL_11997978	2022-03-29
MT	BA.2	USA	EPI_ISL_12034906	2022-03-29
MT	BA.2	France	EPI_ISL_12070492	2022-03-29
MT	BA.2	Wales	EPI_ISL_12108361	2022-03-29
MT	BA.2	USA	EPI_ISL_12117933	2022-03-29
MT	BA.2	Czech_Republic	EPI_ISL_12223079	2022-03-29
MT	BA.2	Australia	EPI_ISL_12308996	2022-03-29
MT	BA.2	USA	EPI_ISL_12328724	2022-03-29
MT	BA.2	Germany	EPI_ISL_12364032	2022-03-29
MT	BA.2	Spain	EPI_ISL_16197607	2022-03-29
MT	BA.2	Denmark	EPI_ISL_11782946	2022-03-30
MT	BA.2	Denmark	EPI_ISL_11789407	2022-03-30
MT	BA.2	Denmark	EPI_ISL_11873150	2022-03-30
MT	BA.2	South_Africa	EPI_ISL_11999061	2022-03-30
MT	BA.2	Israel	EPI_ISL_12007582	2022-03-30
MT	BA.2	Germany	EPI_ISL_12019755	2022-03-30
MT	BA.2	Denmark	EPI_ISL_12021794	2022-03-30
MT	BA.2	France	EPI_ISL_12076663	2022-03-30
MT	BA.2	England	EPI_ISL_12102391	2022-03-30
MT	BA.2	England	EPI_ISL_12104387	2022-03-30
MT	BA.2	Germany	EPI_ISL_12188711	2022-03-30
MT	BA.2	England	EPI_ISL_12204096	2022-03-30
MT	BA.2	USA	EPI_ISL_12328578	2022-03-30
MT	BA.2	Canada	EPI_ISL_12383686	2022-03-30
MT	BA.2	Canada	EPI_ISL_12423980	2022-03-30
MT	BA.2	Canada	EPI_ISL_12424015	2022-03-30
MT	BA.2	Germany	EPI_ISL_12524699	2022-03-30
MT	BA.2	Slovakia	EPI_ISL_12528412	2022-03-30
MT	BA.2	England	EPI_ISL_12561723	2022-03-30
MT	BA.2	England	EPI_ISL_12774126	2022-03-30
MT	BA.2	England	EPI_ISL_12774433	2022-03-30
MT	BA.2	England	EPI_ISL_12774719	2022-03-30
MT	BA.2	Germany	EPI_ISL_13925430	2022-03-30
MT	BA.2	Spain	EPI_ISL_16197427	2022-03-30
MT	BA.2	Scotland	EPI_ISL_11918696	2022-03-31
MT	BA.2	USA	EPI_ISL_12053469	2022-03-31
MT	BA.2	England	EPI_ISL_12076578	2022-03-31
MT	BA.2	Germany	EPI_ISL_12189148	2022-03-31
MT	BA.2	England	EPI_ISL_12204148	2022-03-31
MT	BA.2	Australia	EPI_ISL_12220462	2022-03-31
MT	BA.2	Germany	EPI_ISL_12365034	2022-03-31
MT	BA.2	Canada	EPI_ISL_12383932	2022-03-31
MT	BA.2	Wales	EPI_ISL_12412448	2022-03-31
MT	BA.2	Wales	EPI_ISL_12412453	2022-03-31
MT	BA.2	England	EPI_ISL_18063522	2022-03-31
MT	BA.2	Denmark	EPI_ISL_11807010	2022-04-01
MT	BA.2	Denmark	EPI_ISL_11876345	2022-04-01
MT	BA.2	Switzerland	EPI_ISL_11919067	2022-04-01
MT	BA.2	Scotland	EPI_ISL_12085064	2022-04-01
MT	BA.2	Germany	EPI_ISL_12187951	2022-04-01
MT	BA.2	Slovakia	EPI_ISL_12231951	2022-04-01
MT	BA.2	France	EPI_ISL_12251504	2022-04-01
MT	BA.2	Wales	EPI_ISL_12407630	2022-04-01
MT	BA.2	Australia	EPI_ISL_12442576	2022-04-01
MT	BA.2	England	EPI_ISL_12773404	2022-04-01
MT	BA.2	Russia	EPI_ISL_15872502	2022-04-01
MT	BA.2	Denmark	EPI_ISL_11833473	2022-04-02
MT	BA.2	Wales	EPI_ISL_12407825	2022-04-02
MT	BA.2	Romania	EPI_ISL_12603543	2022-04-02
MT	BA.2	England	EPI_ISL_18064332	2022-04-02
MT	BA.2	Denmark	EPI_ISL_11876650	2022-04-03
MT	BA.2	England	EPI_ISL_11916883	2022-04-03
MT	BA.2	England	EPI_ISL_11917175	2022-04-03
MT	BA.2	Denmark	EPI_ISL_11987800	2022-04-03
MT	BA.2	Denmark	EPI_ISL_11991365	2022-04-03
MT	BA.2	England	EPI_ISL_12105719	2022-04-03
MT	BA.2	England	EPI_ISL_12106088	2022-04-03
MT	BA.2	USA	EPI_ISL_12182082	2022-04-03
MT	BA.2	England	EPI_ISL_12221897	2022-04-03
MT	BA.2	Netherlands	EPI_ISL_12222368	2022-04-03
MT	BA.2	England	EPI_ISL_12403620	2022-04-03
MT	BA.2	England	EPI_ISL_13712697	2022-04-03
MT	BA.2	England	EPI_ISL_13712771	2022-04-03
MT	BA.2	Belgium	EPI_ISL_11901637	2022-04-04
MT	BA.2	England	EPI_ISL_11916704	2022-04-04
MT	BA.2	Scotland	EPI_ISL_11980750	2022-04-04
MT	BA.2	Scotland	EPI_ISL_11980888	2022-04-04
MT	BA.2	Denmark	EPI_ISL_11987999	2022-04-04
MT	BA.2	Denmark	EPI_ISL_11988598	2022-04-04
MT	BA.2	Denmark	EPI_ISL_11993387	2022-04-04
MT	BA.2	Czech_Republic	EPI_ISL_12132684	2022-04-04
MT	BA.2	England	EPI_ISL_12159951	2022-04-04
MT	BA.2	Germany	EPI_ISL_12198511	2022-04-04
MT	BA.2	France	EPI_ISL_12208908	2022-04-04
MT	BA.2	Japan	EPI_ISL_12243526	2022-04-04
MT	BA.2	France	EPI_ISL_12248914	2022-04-04
MT	BA.2	USA	EPI_ISL_12328785	2022-04-04
MT	BA.2	Croatia	EPI_ISL_12491172	2022-04-04
MT	BA.2	USA	EPI_ISL_12564055	2022-04-04
MT	BA.2	Ireland	EPI_ISL_12585284	2022-04-04
MT	BA.2	Ireland	EPI_ISL_12743138	2022-04-04
MT	BA.2	Slovenia	EPI_ISL_13251851	2022-04-04
MT	BA.2	England	EPI_ISL_13712610	2022-04-04
MT	BA.2	Scotland	EPI_ISL_18083834	2022-04-04
MT	BA.2	Denmark	EPI_ISL_18159375	2022-04-04
MT	BA.2	England	EPI_ISL_18682480	2022-04-04
MT	BA.2	Singapore	EPI_ISL_11982736	2022-04-05
MT	BA.2	Denmark	EPI_ISL_11987717	2022-04-05
MT	BA.2	Denmark	EPI_ISL_11990443	2022-04-05
MT	BA.2	USA	EPI_ISL_12116861	2022-04-05
MT	BA.2	Germany	EPI_ISL_12190062	2022-04-05
MT	BA.2	France	EPI_ISL_12251827	2022-04-05
MT	BA.2	Wales	EPI_ISL_12269673	2022-04-05
MT	BA.2	Germany	EPI_ISL_12367841	2022-04-05
MT	BA.2	England	EPI_ISL_12555970	2022-04-05
MT	BA.2	Brazil	EPI_ISL_12930672	2022-04-05
MT	BA.2	Italy	EPI_ISL_13862308	2022-04-05
MT	BA.2	Germany	EPI_ISL_13945258	2022-04-05
MT	BA.2	Germany	EPI_ISL_13945261	2022-04-05
MT	BA.2	USA	EPI_ISL_14030913	2022-04-05
MT	BA.2	England	EPI_ISL_18064336	2022-04-05
MT	BA.2	Italy	EPI_ISL_12131987	2022-04-06
MT	BA.2	Denmark	EPI_ISL_12159443	2022-04-06
MT	BA.2	Denmark	EPI_ISL_12166022	2022-04-06
MT	BA.2	Germany	EPI_ISL_12194624	2022-04-06
MT	BA.2	Germany	EPI_ISL_12196388	2022-04-06
MT	BA.2	England	EPI_ISL_12223356	2022-04-06
MT	BA.2	Northern_Ireland	EPI_ISL_12255755	2022-04-06
MT	BA.2	Denmark	EPI_ISL_12399906	2022-04-06
MT	BA.2	Romania	EPI_ISL_12603719	2022-04-06
MT	BA.2	Japan	EPI_ISL_12627760	2022-04-06
MT	BA.2	Latvia	EPI_ISL_13627829	2022-04-06
MT	BA.2	Russia	EPI_ISL_15885256	2022-04-06
FG	JN.1	USA	EPI_ISL_18887459	2022-04-07
MT	BA.2	Denmark	EPI_ISL_12023518	2022-04-07
MT	BA.2	England	EPI_ISL_12066206	2022-04-07
MT	BA.2	England	EPI_ISL_12067223	2022-04-07
MT	BA.2	Denmark	EPI_ISL_12139444	2022-04-07
MT	BA.2	Germany	EPI_ISL_12194613	2022-04-07
MT	BA.2	Germany	EPI_ISL_12198198	2022-04-07
MT	BA.2	Germany	EPI_ISL_12198271	2022-04-07
MT	BA.2	England	EPI_ISL_12222642	2022-04-07
MT	BA.2	Sweden	EPI_ISL_12265648	2022-04-07
MT	BA.2	Germany	EPI_ISL_12333403	2022-04-07
MT	BA.2	Australia	EPI_ISL_12434322	2022-04-07
MT	BA.2	Turkey	EPI_ISL_12584007	2022-04-07
MT	BA.2	Japan	EPI_ISL_12944682	2022-04-07
MT	BA.2	Greece	EPI_ISL_15209980	2022-04-07
MT	BA.2	Scotland	EPI_ISL_18243788	2022-04-07
MT	BA.2	Denmark	EPI_ISL_12022840	2022-04-08
MT	BA.2	USA	EPI_ISL_12272963	2022-04-08
MT	BA.2	Slovakia	EPI_ISL_12286479	2022-04-08
MT	BA.2	India	EPI_ISL_12354625	2022-04-08
MT	BA.2	Wales	EPI_ISL_12454374	2022-04-08
MT	BA.2	Israel	EPI_ISL_12536459	2022-04-08
MT	BA.2	Israel	EPI_ISL_12536495	2022-04-08
MT	BA.2	Russia	EPI_ISL_15872525	2022-04-08
MT	BA.2	USA	EPI_ISL_12169723	2022-04-09
MT	BA.2	USA	EPI_ISL_12169895	2022-04-09
MT	BA.2	Germany	EPI_ISL_12199711	2022-04-09
MT	BA.2	England	EPI_ISL_12287688	2022-04-09
MT	BA.2	Spain	EPI_ISL_12351927	2022-04-09
MT	BA.2	France	EPI_ISL_12373044	2022-04-09
MT	BA.2	Germany	EPI_ISL_12522144	2022-04-09
MT	BA.2	Spain	EPI_ISL_13092554	2022-04-09
MT	BA.2	Cyprus	EPI_ISL_18479091	2022-04-09
MT	BA.2	Scotland	EPI_ISL_12125690	2022-04-10
MT	BA.2	Germany	EPI_ISL_12190668	2022-04-10
MT	BA.2	USA	EPI_ISL_12331068	2022-04-10
MT	BA.2	England	EPI_ISL_12347747	2022-04-10
MT	BA.2	Germany	EPI_ISL_12362554	2022-04-10
MT	BA.2	USA	EPI_ISL_12420322	2022-04-10
MT	BA.2	Australia	EPI_ISL_12434352	2022-04-10
MT	BA.2	Australia	EPI_ISL_12434379	2022-04-10
MT	BA.2	Northern_Ireland	EPI_ISL_12559288	2022-04-10
MT	BA.2	USA	EPI_ISL_14938394	2022-04-10
MT	BA.2	USA	EPI_ISL_12090315	2022-04-11
MT	BA.2	India	EPI_ISL_12223742	2022-04-11
MT	BA.2	India	EPI_ISL_12223772	2022-04-11
MT	BA.2	France	EPI_ISL_12248929	2022-04-11
MT	BA.2	France	EPI_ISL_12251451	2022-04-11
MT	BA.2	Belgium	EPI_ISL_12254464	2022-04-11
MT	BA.2	USA	EPI_ISL_12274422	2022-04-11
MT	BA.2	USA	EPI_ISL_12277642	2022-04-11
MT	BA.2	Portugal	EPI_ISL_12290113	2022-04-11
MT	BA.2	Portugal	EPI_ISL_12290163	2022-04-11
MT	BA.2	Portugal	EPI_ISL_12290167	2022-04-11
MT	BA.2	Malaysia	EPI_ISL_12321900	2022-04-11
MT	BA.2	USA	EPI_ISL_12332272	2022-04-11
MT	BA.2	Germany	EPI_ISL_12342978	2022-04-11
MT	BA.2	France	EPI_ISL_12411949	2022-04-11
MT	BA.2	France	EPI_ISL_12420984	2022-04-11
MT	BA.2	France	EPI_ISL_12421468	2022-04-11
MT	BA.2	France	EPI_ISL_12499715	2022-04-11
MT	BA.2	Slovakia	EPI_ISL_12528601	2022-04-11
MT	BA.2	Sweden	EPI_ISL_12571769	2022-04-11
MT	BA.2	Netherlands	EPI_ISL_12635123	2022-04-11
MT	BA.2	England	EPI_ISL_12969714	2022-04-11
MT	BA.2	Brazil	EPI_ISL_13363845	2022-04-11
MT	BA.2	Spain	EPI_ISL_16211401	2022-04-11
MT	BA.2	England	EPI_ISL_12122747	2022-04-12
MT	BA.2	Germany	EPI_ISL_12197153	2022-04-12
MT	BA.2	France	EPI_ISL_12261973	2022-04-12
MT	BA.2	Denmark	EPI_ISL_12286135	2022-04-12
MT	BA.2	Denmark	EPI_ISL_12287013	2022-04-12
MT	BA.2	Denmark	EPI_ISL_12290790	2022-04-12
MT	BA.2	Australia	EPI_ISL_12391627	2022-04-12
MT	BA.2	Czech_Republic	EPI_ISL_12487101	2022-04-12
MT	BA.2	Czech_Republic	EPI_ISL_12487109	2022-04-12
MT	BA.2	Germany	EPI_ISL_12528818	2022-04-12
MT	BA.2	Brazil	EPI_ISL_13363894	2022-04-12
MT	BA.2	USA	EPI_ISL_14958531	2022-04-12
MT	BA.2	USA	EPI_ISL_14983454	2022-04-12
MT	BA.2	Scotland	EPI_ISL_18089929	2022-04-12
MT	BA.2	England	EPI_ISL_12151842	2022-04-13
MT	BA.2	France	EPI_ISL_12153872	2022-04-13
MT	BA.2	Denmark	EPI_ISL_12162585	2022-04-13
MT	BA.2	Denmark	EPI_ISL_12163309	2022-04-13
MT	BA.2	Denmark	EPI_ISL_12165757	2022-04-13
MT	BA.2	England	EPI_ISL_12178727	2022-04-13
MT	BA.2	Denmark	EPI_ISL_12246237	2022-04-13
MT	BA.2	Denmark	EPI_ISL_12249280	2022-04-13
MT	BA.2	Canada	EPI_ISL_12266427	2022-04-13
MT	BA.2	Canada	EPI_ISL_12323741	2022-04-13
MT	BA.2	Germany	EPI_ISL_12344114	2022-04-13
MT	BA.2	Germany	EPI_ISL_12358317	2022-04-13
MT	BA.2	England	EPI_ISL_12445315	2022-04-13
MT	BA.2	Croatia	EPI_ISL_12491178	2022-04-13
MT	BA.2	Netherlands	EPI_ISL_12551571	2022-04-13
MT	BA.2	Romania	EPI_ISL_12603771	2022-04-13
MT	BA.2	Romania	EPI_ISL_12603776	2022-04-13
MT	BA.2	Sweden	EPI_ISL_12751761	2022-04-13
MT	BA.2	France	EPI_ISL_12785776	2022-04-13
MT	BA.2	Malaysia	EPI_ISL_14195653	2022-04-13
MT	BA.2	Denmark	EPI_ISL_12246115	2022-04-14
MT	BA.2	Denmark	EPI_ISL_12249242	2022-04-14
MT	BA.2	Spain	EPI_ISL_12253961	2022-04-14
MT	BA.2	USA	EPI_ISL_12258072	2022-04-14
MT	BA.2	England	EPI_ISL_12403751	2022-04-14
MT	BA.2	Luxembourg	EPI_ISL_12448670	2022-04-14
MT	BA.2	England	EPI_ISL_12552395	2022-04-14
MT	BA.2	England	EPI_ISL_12560914	2022-04-14
MT	BA.2	England	EPI_ISL_12583624	2022-04-14
MT	BA.2	Netherlands	EPI_ISL_12650607	2022-04-14
MT	BA.2	Germany	EPI_ISL_12668685	2022-04-14
MT	BA.2	Denmark	EPI_ISL_12207973	2022-04-15
MT	BA.2	Scotland	EPI_ISL_12211869	2022-04-15
MT	BA.2	England	EPI_ISL_12253290	2022-04-15
MT	BA.2	Canada	EPI_ISL_12266517	2022-04-15
MT	BA.2	Germany	EPI_ISL_12358988	2022-04-15
MT	BA.2	England	EPI_ISL_12403275	2022-04-15
MT	BA.2	England	EPI_ISL_12448069	2022-04-15
MT	BA.2	Israel	EPI_ISL_12455590	2022-04-15
MT	BA.2	Denmark	EPI_ISL_12473268	2022-04-15
MT	BA.2	Netherlands	EPI_ISL_12476377	2022-04-15
MT	BA.2	USA	EPI_ISL_12592126	2022-04-15
MT	BA.2	Scotland	EPI_ISL_12810333	2022-04-15
MT	BA.2	Slovenia	EPI_ISL_13272124	2022-04-15
MT	BA.2	Slovenia	EPI_ISL_13272129	2022-04-15
MT	BA.2	Denmark	EPI_ISL_12206693	2022-04-16
MT	BA.2	Denmark	EPI_ISL_12207902	2022-04-16
MT	BA.2	Scotland	EPI_ISL_12237049	2022-04-16
MT	BA.2	Scotland	EPI_ISL_12237217	2022-04-16
MT	BA.2	Scotland	EPI_ISL_12237897	2022-04-16
MT	BA.2	USA	EPI_ISL_12258225	2022-04-16
MT	BA.2	Germany	EPI_ISL_12357387	2022-04-16
MT	BA.2	Czech_Republic	EPI_ISL_12487149	2022-04-16
MT	BA.2	Sweden	EPI_ISL_12571832	2022-04-16
MT	BA.2	Japan	EPI_ISL_12944797	2022-04-16
MT	BA.2	Scotland	EPI_ISL_13130316	2022-04-16
MT	BA.2	Malaysia	EPI_ISL_14663818	2022-04-16
MT	BA.2	Greece	EPI_ISL_15210893	2022-04-16
MT	BA.2	Denmark	EPI_ISL_12246050	2022-04-17
MT	BA.2	Denmark	EPI_ISL_12247311	2022-04-17
MT	BA.2	Denmark	EPI_ISL_12291665	2022-04-17
MT	BA.2	Germany	EPI_ISL_12360034	2022-04-17
MT	BA.2	Portugal	EPI_ISL_12464770	2022-04-17
MT	BA.2	Portugal	EPI_ISL_12464804	2022-04-17
MT	BA.2	Norway	EPI_ISL_12752283	2022-04-17
MT	BA.2	Switzerland	EPI_ISL_12972935	2022-04-17
MT	BA.2	England	EPI_ISL_12241242	2022-04-18
MT	BA.2	Scotland	EPI_ISL_12283032	2022-04-18
MT	BA.2	Scotland	EPI_ISL_12283513	2022-04-18
MT	BA.2	Scotland	EPI_ISL_12283946	2022-04-18
MT	BA.2	Scotland	EPI_ISL_12284244	2022-04-18
MT	BA.2	Denmark	EPI_ISL_12289633	2022-04-18
MT	BA.2	Denmark	EPI_ISL_12290247	2022-04-18
MT	BA.2	Denmark	EPI_ISL_12291776	2022-04-18
MT	BA.2	Germany	EPI_ISL_12361074	2022-04-18
MT	BA.2	Israel	EPI_ISL_12456672	2022-04-18
MT	BA.2	Portugal	EPI_ISL_12464743	2022-04-18
MT	BA.2	Portugal	EPI_ISL_12464859	2022-04-18
MT	BA.2	USA	EPI_ISL_12507918	2022-04-18
MT	BA.2	Lithuania	EPI_ISL_12538088	2022-04-18
MT	BA.2	Wales	EPI_ISL_12563356	2022-04-18
MT	BA.2	England	EPI_ISL_12582108	2022-04-18
MT	BA.2	USA	EPI_ISL_12612757	2022-04-18
MT	BA.2	Slovakia	EPI_ISL_12620253	2022-04-18
MT	BA.2	Scotland	EPI_ISL_12678817	2022-04-18
MT	BA.2	Greece	EPI_ISL_12785150	2022-04-18
MT	BA.2	Denmark	EPI_ISL_12245196	2022-04-19
MT	BA.2	Denmark	EPI_ISL_12248169	2022-04-19
MT	BA.2	Scotland	EPI_ISL_12281403	2022-04-19
MT	BA.2	Scotland	EPI_ISL_12281852	2022-04-19
MT	BA.2	Scotland	EPI_ISL_12282673	2022-04-19
MT	BA.2	Scotland	EPI_ISL_12283021	2022-04-19
MT	BA.2	Scotland	EPI_ISL_12283306	2022-04-19
MT	BA.2	Denmark	EPI_ISL_12346307	2022-04-19
MT	BA.2	Denmark	EPI_ISL_12401288	2022-04-19
MT	BA.2	Luxembourg	EPI_ISL_12441173	2022-04-19
MT	BA.2	England	EPI_ISL_12445111	2022-04-19
MT	BA.2	France	EPI_ISL_12472617	2022-04-19
MT	BA.2	Germany	EPI_ISL_12518765	2022-04-19
MT	BA.2	India	EPI_ISL_12559499	2022-04-19
MT	BA.2	France	EPI_ISL_12582527	2022-04-19
MT	BA.2	England	EPI_ISL_12583626	2022-04-19
MT	BA.2	USA	EPI_ISL_12611903	2022-04-19
MT	BA.2	England	EPI_ISL_12649324	2022-04-19
MT	BA.2	Scotland	EPI_ISL_12678784	2022-04-19
MT	BA.2	France	EPI_ISL_12787062	2022-04-19
MT	BA.2	Trinidad_and_Tobago	EPI_ISL_12877781	2022-04-19
MT	BA.2	France	EPI_ISL_13069334	2022-04-19
MT	BA.2	France	EPI_ISL_13329381	2022-04-19
MT	BA.2	France	EPI_ISL_13387477	2022-04-19
MT	BA.2	France	EPI_ISL_13462477	2022-04-19
MT	BA.2	Italy	EPI_ISL_13958592	2022-04-19
MT	BA.2	Spain	EPI_ISL_16211900	2022-04-19
MT	BA.2	South_Africa	EPI_ISL_12267753	2022-04-20
MT	BA.2	Austria	EPI_ISL_12293319	2022-04-20
MT	BA.2	Germany	EPI_ISL_12368247	2022-04-20
MT	BA.2	Denmark	EPI_ISL_12400408	2022-04-20
MT	BA.2	Switzerland	EPI_ISL_12440740	2022-04-20
MT	BA.2	Canada	EPI_ISL_12466326	2022-04-20
MT	BA.2	Lithuania	EPI_ISL_12475521	2022-04-20
MT	BA.2	Lithuania	EPI_ISL_12538053	2022-04-20
MT	BA.2	England	EPI_ISL_12549618	2022-04-20
MT	BA.2	Scotland	EPI_ISL_12749093	2022-04-20
MT	BA.2	USA	EPI_ISL_12801809	2022-04-20
MT	BA.2	Norway	EPI_ISL_12809756	2022-04-20
MT	BA.2	Mauritius	EPI_ISL_12970507	2022-04-20
MT	BA.2	Belgium	EPI_ISL_13051557	2022-04-20
MT	BA.2	Turkey	EPI_ISL_13114003	2022-04-20
MT	BA.2	Turkey	EPI_ISL_13177514	2022-04-20
MT	BA.2	Spain	EPI_ISL_13283228	2022-04-20
MT	BA.2	England	EPI_ISL_12312032	2022-04-21
MT	BA.2	Denmark	EPI_ISL_12317910	2022-04-21
MT	BA.2	Denmark	EPI_ISL_12345441	2022-04-21
MT	BA.2	Denmark	EPI_ISL_12346572	2022-04-21
MT	BA.2	Scotland	EPI_ISL_12395807	2022-04-21
MT	BA.2	Scotland	EPI_ISL_12395953	2022-04-21
MT	BA.2	England	EPI_ISL_12428745	2022-04-21
MT	BA.2	England	EPI_ISL_12428985	2022-04-21
MT	BA.2	USA	EPI_ISL_12462390	2022-04-21
MT	BA.2	USA	EPI_ISL_12530961	2022-04-21
MT	BA.2	England	EPI_ISL_12549358	2022-04-21
MT	BA.2	USA	EPI_ISL_12594050	2022-04-21
MT	BA.2	Canada	EPI_ISL_12664683	2022-04-21
MT	BA.2	Canada	EPI_ISL_12665096	2022-04-21
MT	BA.2	Japan	EPI_ISL_12724697	2022-04-21
MT	BA.2	USA	EPI_ISL_12759653	2022-04-21
MT	BA.2	Netherlands	EPI_ISL_12783045	2022-04-21
MT	BA.2	Estonia	EPI_ISL_13029343	2022-04-21
MT	BA.2	France	EPI_ISL_13085477	2022-04-21
MT	BA.2	Turkey	EPI_ISL_13113825	2022-04-21
MT	BA.2	Turkey	EPI_ISL_13113842	2022-04-21
MT	BA.2	Russia	EPI_ISL_14424670	2022-04-21
MT	BA.2	Denmark	EPI_ISL_12318493	2022-04-22
MT	BA.2	USA	EPI_ISL_12462340	2022-04-22
MT	BA.2	Italy	EPI_ISL_12493887	2022-04-22
MT	BA.2	Germany	EPI_ISL_12513460	2022-04-22
MT	BA.2	Canada	EPI_ISL_12665162	2022-04-22
MT	BA.2	Israel	EPI_ISL_12903015	2022-04-22
MT	BA.2	Spain	EPI_ISL_13092646	2022-04-22
MT	BA.2	Slovenia	EPI_ISL_13272398	2022-04-22
MT	BA.2	Jamaica	EPI_ISL_13462654	2022-04-22
MT	BA.2	England	EPI_ISL_12435100	2022-04-23
MT	BA.2	Scotland	EPI_ISL_12481694	2022-04-23
MT	BA.2	Lithuania	EPI_ISL_12538064	2022-04-23
MT	BA.2	USA	EPI_ISL_12619316	2022-04-23
MT	BA.2	USA	EPI_ISL_12710985	2022-04-23
MT	BA.2	Slovakia	EPI_ISL_12851970	2022-04-23
MT	BA.2	Mauritius	EPI_ISL_12952766	2022-04-23
MT	BA.2	Denmark	EPI_ISL_12400326	2022-04-24
MT	BA.2	England	EPI_ISL_12584369	2022-04-24
MT	BA.2	USA	EPI_ISL_12611848	2022-04-24
MT	BA.2	USA	EPI_ISL_12613376	2022-04-24
MT	BA.2	USA	EPI_ISL_12640915	2022-04-24
MT	BA.2	USA	EPI_ISL_12659471	2022-04-24
MT	BA.2	Estonia	EPI_ISL_13029222	2022-04-24
MT	BA.2	Turkey	EPI_ISL_13112727	2022-04-24
MT	BA.2	Ireland	EPI_ISL_13123793	2022-04-24
MT	BA.2	Australia	EPI_ISL_13227650	2022-04-24
MT	BA.2	England	EPI_ISL_12434739	2022-04-25
MT	BA.2	England	EPI_ISL_12434920	2022-04-25
MT	BA.2	Denmark	EPI_ISL_12435667	2022-04-25
MT	BA.2	Denmark	EPI_ISL_12435906	2022-04-25
MT	BA.2	Austria	EPI_ISL_12471955	2022-04-25
MT	BA.2	Denmark	EPI_ISL_12473069	2022-04-25
MT	BA.2	Scotland	EPI_ISL_12480242	2022-04-25
MT	BA.2	France	EPI_ISL_12587273	2022-04-25
MT	BA.2	Portugal	EPI_ISL_12598514	2022-04-25
MT	BA.2	USA	EPI_ISL_12611831	2022-04-25
MT	BA.2	France	EPI_ISL_12628560	2022-04-25
MT	BA.2	France	EPI_ISL_12628779	2022-04-25
MT	BA.2	France	EPI_ISL_12628784	2022-04-25
MT	BA.2	France	EPI_ISL_12628795	2022-04-25
MT	BA.2	France	EPI_ISL_12628926	2022-04-25
MT	BA.2	France	EPI_ISL_12652938	2022-04-25
MT	BA.2	USA	EPI_ISL_12659956	2022-04-25
MT	BA.2	Germany	EPI_ISL_12670414	2022-04-25
MT	BA.2	France	EPI_ISL_12750227	2022-04-25
MT	BA.2	France	EPI_ISL_12786976	2022-04-25
MT	BA.2	France	EPI_ISL_12787619	2022-04-25
MT	BA.2	Germany	EPI_ISL_12814226	2022-04-25
MT	BA.2	Switzerland	EPI_ISL_12866538	2022-04-25
MT	BA.2	Slovakia	EPI_ISL_12872697	2022-04-25
MT	BA.2	France	EPI_ISL_12996825	2022-04-25
MT	BA.2	Canada	EPI_ISL_13016319	2022-04-25
MT	BA.2	France	EPI_ISL_13086191	2022-04-25
MT	BA.2	Thailand	EPI_ISL_13276660	2022-04-25
MT	BA.2	Ireland	EPI_ISL_13279931	2022-04-25
MT	BA.2	France	EPI_ISL_13330554	2022-04-25
MT	BA.2	Germany	EPI_ISL_13383260	2022-04-25
MT	BA.2	France	EPI_ISL_14972270	2022-04-25
MT	BA.2	USA	EPI_ISL_15639990	2022-04-25
MT	BA.2	USA	EPI_ISL_17061752	2022-04-25
MT	BA.2	Belgium	EPI_ISL_12456455	2022-04-26
MT	BA.2	Denmark	EPI_ISL_12472219	2022-04-26
MT	BA.2	England	EPI_ISL_12477658	2022-04-26
MT	BA.2	Scotland	EPI_ISL_12478167	2022-04-26
MT	BA.2	Scotland	EPI_ISL_12478299	2022-04-26
MT	BA.2	Scotland	EPI_ISL_12478476	2022-04-26
MT	BA.2	USA	EPI_ISL_12595655	2022-04-26
MT	BA.2	USA	EPI_ISL_12614241	2022-04-26
MT	BA.2	USA	EPI_ISL_12621133	2022-04-26
MT	BA.2	USA	EPI_ISL_12637991	2022-04-26
MT	BA.2	Germany	EPI_ISL_12732263	2022-04-26
MT	BA.2	Lithuania	EPI_ISL_12771714	2022-04-26
MT	BA.2	Peru	EPI_ISL_12782473	2022-04-26
MT	BA.2	Norway	EPI_ISL_12809684	2022-04-26
MT	BA.2	Norway	EPI_ISL_12809768	2022-04-26
MT	BA.2	Spain	EPI_ISL_13092906	2022-04-26
MT	BA.2	Turkey	EPI_ISL_13185049	2022-04-26
MT	BA.2	Scotland	EPI_ISL_12490249	2022-04-27
MT	BA.2	Scotland	EPI_ISL_12490551	2022-04-27
MT	BA.2	Denmark	EPI_ISL_12557020	2022-04-27
MT	BA.2	USA	EPI_ISL_12590382	2022-04-27
MT	BA.2	USA	EPI_ISL_12638331	2022-04-27
MT	BA.2	Germany	EPI_ISL_12672552	2022-04-27
MT	BA.2	Scotland	EPI_ISL_12810350	2022-04-27
MT	BA.2	Germany	EPI_ISL_12815492	2022-04-27
MT	BA.2	Australia	EPI_ISL_12849358	2022-04-27
MT	BA.2	Ireland	EPI_ISL_13280458	2022-04-27
MT	BA.2	Jamaica	EPI_ISL_13821686	2022-04-27
MT	BA.2	Mongolia	EPI_ISL_14718253	2022-04-27
MT	BA.2	USA	EPI_ISL_17510267	2022-04-27
MT	BA.2	Denmark	EPI_ISL_12492013	2022-04-28
MT	BA.2	Denmark	EPI_ISL_12492256	2022-04-28
MT	BA.2	USA	EPI_ISL_12654570	2022-04-28
MT	BA.2	Germany	EPI_ISL_12670686	2022-04-28
MT	BA.2	USA	EPI_ISL_12745164	2022-04-28
MT	BA.2	Scotland	EPI_ISL_12853045	2022-04-28
MT	BA.2	Spain	EPI_ISL_13093024	2022-04-28
MT	BA.2	France	EPI_ISL_13190123	2022-04-28
MT	BA.2	Finland	EPI_ISL_16033450	2022-04-28
MT	BA.2	Spain	EPI_ISL_16211962	2022-04-28
MT	BA.2	Germany	EPI_ISL_12529190	2022-04-29
MT	BA.2	Scotland	EPI_ISL_12547022	2022-04-29
MT	BA.2	USA	EPI_ISL_12588578	2022-04-29
MT	BA.2	Israel	EPI_ISL_12637242	2022-04-29
MT	BA.2	USA	EPI_ISL_12655524	2022-04-29
MT	BA.2	Germany	EPI_ISL_12815567	2022-04-29
MT	BA.2	Germany	EPI_ISL_12816384	2022-04-29
MT	BA.2	Russia	EPI_ISL_15864830	2022-04-29
MT	BA.2	Belgium	EPI_ISL_12530150	2022-04-30
MT	BA.2	Denmark	EPI_ISL_12533216	2022-04-30
MT	BA.2	Israel	EPI_ISL_12633074	2022-04-30
MT	BA.2	Australia	EPI_ISL_12701701	2022-04-30
MT	BA.2	Germany	EPI_ISL_13925435	2022-04-30
MT	BA.2	USA	EPI_ISL_15235649	2022-04-30
MT	BA.2	Australia	EPI_ISL_12679267	2022-05-01
MT	BA.2	Italy	EPI_ISL_12749778	2022-05-01
MT	BA.2	Ireland	EPI_ISL_13446360	2022-05-01
MT	BA.2	Germany	EPI_ISL_14522331	2022-05-01
MT	BA.2	Denmark	EPI_ISL_12578947	2022-05-02
MT	BA.2	France	EPI_ISL_12580373	2022-05-02
MT	BA.2	France	EPI_ISL_12580408	2022-05-02
MT	BA.2	France	EPI_ISL_12585688	2022-05-02
MT	BA.2	France	EPI_ISL_12587992	2022-05-02
MT	BA.2	Denmark	EPI_ISL_12608173	2022-05-02
MT	BA.2	France	EPI_ISL_12617145	2022-05-02
MT	BA.2	Germany	EPI_ISL_12675465	2022-05-02
MT	BA.2	USA	EPI_ISL_12691470	2022-05-02
MT	BA.2	France	EPI_ISL_12699201	2022-05-02
MT	BA.2	France	EPI_ISL_12699299	2022-05-02
MT	BA.2	Czech_Republic	EPI_ISL_12705053	2022-05-02
MT	BA.2	Portugal	EPI_ISL_12720947	2022-05-02
MT	BA.2	Israel	EPI_ISL_12741495	2022-05-02
MT	BA.2	France	EPI_ISL_12960876	2022-05-02
MT	BA.2	Norway	EPI_ISL_12983018	2022-05-02
MT	BA.2	USA	EPI_ISL_15709541	2022-05-02
MT	BA.2	Cameroon	EPI_ISL_16985973	2022-05-02
MT	BA.2	Scotland	EPI_ISL_12629789	2022-05-03
MT	BA.2	Denmark	EPI_ISL_12648515	2022-05-03
MT	BA.2	Denmark	EPI_ISL_12648779	2022-05-03
MT	BA.2	England	EPI_ISL_12666898	2022-05-03
MT	BA.2	Germany	EPI_ISL_12677677	2022-05-03
MT	BA.2	USA	EPI_ISL_12707785	2022-05-03
MT	BA.2	USA	EPI_ISL_12712275	2022-05-03
MT	BA.2	Portugal	EPI_ISL_12721061	2022-05-03
MT	BA.2	Portugal	EPI_ISL_12721240	2022-05-03
MT	BA.2	USA	EPI_ISL_12758284	2022-05-03
MT	BA.2	USA	EPI_ISL_12789702	2022-05-03
MT	BA.2	Australia	EPI_ISL_12850054	2022-05-03
MT	BA.2	Wales	EPI_ISL_12893882	2022-05-03
MT	BA.2	Sweden	EPI_ISL_12916853	2022-05-03
MT	BA.2	Germany	EPI_ISL_13925432	2022-05-03
MT	BA.2	Spain	EPI_ISL_16233033	2022-05-03
MT	BA.2	Belgium	EPI_ISL_12588383	2022-05-04
MT	BA.2	Germany	EPI_ISL_12677516	2022-05-04
MT	BA.2	Slovakia	EPI_ISL_12685121	2022-05-04
MT	BA.2	Denmark	EPI_ISL_12701261	2022-05-04
MT	BA.2	England	EPI_ISL_12704657	2022-05-04
MT	BA.2	USA	EPI_ISL_12759972	2022-05-04
MT	BA.2	Scotland	EPI_ISL_12895115	2022-05-04
MT	BA.2	USA	EPI_ISL_12896999	2022-05-04
MT	BA.2	Germany	EPI_ISL_13011072	2022-05-04
MT	BA.2	Switzerland	EPI_ISL_13013135	2022-05-04
MT	BA.2	Sweden	EPI_ISL_13185339	2022-05-04
MT	BA.2	Denmark	EPI_ISL_12631973	2022-05-05
MT	BA.2	Denmark	EPI_ISL_12632193	2022-05-05
MT	BA.2	USA	EPI_ISL_12708467	2022-05-05
MT	BA.2	England	EPI_ISL_12724450	2022-05-05
MT	BA.2	England	EPI_ISL_12724473	2022-05-05
MT	BA.2	Germany	EPI_ISL_12730011	2022-05-05
MT	BA.2	USA	EPI_ISL_12764097	2022-05-05
MT	BA.2	USA	EPI_ISL_12770239	2022-05-05
MT	BA.2	USA	EPI_ISL_12785626	2022-05-05
MT	BA.2	Slovakia	EPI_ISL_12872708	2022-05-05
MT	BA.2	Norway	EPI_ISL_12983138	2022-05-05
MT	BA.2	Scotland	EPI_ISL_12694060	2022-05-06
MT	BA.2	Germany	EPI_ISL_12729047	2022-05-06
MT	BA.2	USA	EPI_ISL_12858002	2022-05-06
MT	BA.2	Slovakia	EPI_ISL_12872762	2022-05-06
MT	BA.2	USA	EPI_ISL_13109697	2022-05-06
MT	BA.2	Slovakia	EPI_ISL_13229244	2022-05-06
MT	BA.2	India	EPI_ISL_13697151	2022-05-06
MT	BA.2	Ireland	EPI_ISL_13775737	2022-05-06
MT	BA.2	Italy	EPI_ISL_13826599	2022-05-06
MT	BA.2	Thailand	EPI_ISL_16061685	2022-05-06
MT	BA.2	Australia	EPI_ISL_12769901	2022-05-07
MT	BA.2	Italy	EPI_ISL_12845961	2022-05-07
MT	BA.2	USA	EPI_ISL_12859228	2022-05-07
MT	BA.2	Scotland	EPI_ISL_12873038	2022-05-07
MT	BA.2	USA	EPI_ISL_12884931	2022-05-07
MT	BA.2	USA	EPI_ISL_12885003	2022-05-07
MT	BA.2	Germany	EPI_ISL_13011257	2022-05-07
MT	BA.2	Japan	EPI_ISL_13026973	2022-05-07
MT	BA.2	Malaysia	EPI_ISL_13064665	2022-05-07
MT	BA.2	Germany	EPI_ISL_17329742	2022-05-07
MT	BA.2	Denmark	EPI_ISL_12700973	2022-05-08
MT	BA.2	England	EPI_ISL_12723288	2022-05-08
MT	BA.2	Germany	EPI_ISL_12735028	2022-05-08
MT	BA.2	Germany	EPI_ISL_12736994	2022-05-08
MT	BA.2	USA	EPI_ISL_12786764	2022-05-08
MT	BA.2	USA	EPI_ISL_12885421	2022-05-08
MT	BA.2	Japan	EPI_ISL_13027031	2022-05-08
MT	BA.2	Denmark	EPI_ISL_13029972	2022-05-08
MT	BA.2	USA	EPI_ISL_14553453	2022-05-08
MT	BA.2	Russia	EPI_ISL_15864942	2022-05-08
MT	BA.2	England	EPI_ISL_12723841	2022-05-09
MT	BA.2	Denmark	EPI_ISL_12727522	2022-05-09
MT	BA.2	Denmark	EPI_ISL_12728316	2022-05-09
MT	BA.2	Germany	EPI_ISL_12739242	2022-05-09
MT	BA.2	Hong_Kong	EPI_ISL_12812549	2022-05-09
MT	BA.2	Portugal	EPI_ISL_12863146	2022-05-09
MT	BA.2	USA	EPI_ISL_12887014	2022-05-09
MT	BA.2	France	EPI_ISL_12893021	2022-05-09
MT	BA.2	France	EPI_ISL_13010670	2022-05-09
MT	BA.2	Germany	EPI_ISL_13011539	2022-05-09
MT	BA.2	France	EPI_ISL_13017642	2022-05-09
MT	BA.2	USA	EPI_ISL_13061745	2022-05-09
MT	BA.2	France	EPI_ISL_13076216	2022-05-09
MT	BA.2	South_Korea	EPI_ISL_13137315	2022-05-09
MT	BA.2	Norway	EPI_ISL_13181798	2022-05-09
MT	BA.2	Belgium	EPI_ISL_13284504	2022-05-09
MT	BA.2	Switzerland	EPI_ISL_13339039	2022-05-09
MT	BA.2	Vietnam	EPI_ISL_13358765	2022-05-09
MT	BA.2	India	EPI_ISL_13697082	2022-05-09
MT	BA.2	France	EPI_ISL_13854249	2022-05-09
MT	BA.2	France	EPI_ISL_15055923	2022-05-09
MT	BA.2	Belgium	EPI_ISL_12642595	2022-05-10
MT	BA.2	England	EPI_ISL_12772370	2022-05-10
MT	BA.2	Denmark	EPI_ISL_12780957	2022-05-10
MT	BA.2	Denmark	EPI_ISL_12781002	2022-05-10
MT	BA.2	Denmark	EPI_ISL_12782269	2022-05-10
MT	BA.2	France	EPI_ISL_12862344	2022-05-10
MT	BA.2	Denmark	EPI_ISL_12895490	2022-05-10
MT	BA.2	Scotland	EPI_ISL_13049050	2022-05-10
MT	BA.2	USA	EPI_ISL_13062117	2022-05-10
MT	BA.2	Turkey	EPI_ISL_13203232	2022-05-10
MT	BA.2	India	EPI_ISL_13697055	2022-05-10
MT	BA.2	Italy	EPI_ISL_13826611	2022-05-10
MT	BA.2	Ireland	EPI_ISL_13951642	2022-05-10
MT	BA.2	Ireland	EPI_ISL_13951645	2022-05-10
MT	BA.2	Belgium	EPI_ISL_12704195	2022-05-11
MT	BA.2	England	EPI_ISL_12772434	2022-05-11
MT	BA.2	USA	EPI_ISL_12839691	2022-05-11
MT	BA.2	Germany	EPI_ISL_12997809	2022-05-11
MT	BA.2	Israel	EPI_ISL_13109976	2022-05-11
MT	BA.2	Ireland	EPI_ISL_13950918	2022-05-11
MT	BA.2	Belgium	EPI_ISL_12712879	2022-05-12
MT	BA.2	USA	EPI_ISL_12717217	2022-05-12
MT	BA.2	France	EPI_ISL_12855971	2022-05-12
MT	BA.2	USA	EPI_ISL_12858881	2022-05-12
MT	BA.2	Belgium	EPI_ISL_12862150	2022-05-12
MT	BA.2	USA	EPI_ISL_12881891	2022-05-12
MT	BA.2	USA	EPI_ISL_12912331	2022-05-12
MT	BA.2	England	EPI_ISL_12999546	2022-05-12
MT	BA.2	England	EPI_ISL_13001457	2022-05-12
MT	BA.2	Spain	EPI_ISL_13001753	2022-05-12
MT	BA.2	Scotland	EPI_ISL_13048707	2022-05-12
MT	BA.2	Slovenia	EPI_ISL_13253349	2022-05-12
MT	BA.2	Mauritius	EPI_ISL_13360215	2022-05-12
MT	BA.2	Northern_Ireland	EPI_ISL_13615826	2022-05-12
MT	BA.2	Latvia	EPI_ISL_13631305	2022-05-12
MT	BA.2	USA	EPI_ISL_13859857	2022-05-12
MT	BA.2	Italy	EPI_ISL_17771036	2022-05-12
MT	BA.2	USA	EPI_ISL_12861428	2022-05-13
MT	BA.2	France	EPI_ISL_12862303	2022-05-13
MT	BA.2	Italy	EPI_ISL_12866633	2022-05-13
MT	BA.2	Germany	EPI_ISL_12997621	2022-05-13
MT	BA.2	Germany	EPI_ISL_13015192	2022-05-13
MT	BA.2	USA	EPI_ISL_13119430	2022-05-13
MT	BA.2	USA	EPI_ISL_13146155	2022-05-13
MT	BA.2	Czech_Republic	EPI_ISL_13202768	2022-05-13
MT	BA.2	India	EPI_ISL_13306932	2022-05-13
MT	BA.2	India	EPI_ISL_13794597	2022-05-13
MT	BA.2	Thailand	EPI_ISL_16061713	2022-05-13
MT	BA.2	Thailand	EPI_ISL_16061715	2022-05-13
MT	BA.2	Jamaica	EPI_ISL_17418915	2022-05-13
MT	BA.2	England	EPI_ISL_13048829	2022-05-14
MT	BA.2	Estonia	EPI_ISL_13133926	2022-05-14
MT	BA.2	Germany	EPI_ISL_13266689	2022-05-14
MT	BA.2	France	EPI_ISL_13324116	2022-05-14
MT	BA.2	Northern_Ireland	EPI_ISL_13615804	2022-05-14
MT	BA.2	USA	EPI_ISL_17536729	2022-05-14
MT	BA.2	USA	EPI_ISL_12915223	2022-05-15
MT	BA.2	Israel	EPI_ISL_12934933	2022-05-15
MT	BA.2	Israel	EPI_ISL_12935114	2022-05-15
MT	BA.2	Germany	EPI_ISL_13000576	2022-05-15
MT	BA.2	Netherlands	EPI_ISL_13214349	2022-05-15
MT	BA.2	Canada	EPI_ISL_13317117	2022-05-15
MT	BA.2	USA	EPI_ISL_15335570	2022-05-15
MT	BA.2	England	EPI_ISL_12851338	2022-05-16
MT	BA.2	England	EPI_ISL_12851394	2022-05-16
MT	BA.2	France	EPI_ISL_12854484	2022-05-16
MT	BA.2	Belgium	EPI_ISL_12861896	2022-05-16
MT	BA.2	Czech_Republic	EPI_ISL_12871842	2022-05-16
MT	BA.2	England	EPI_ISL_12893456	2022-05-16
MT	BA.2	Switzerland	EPI_ISL_12956511	2022-05-16
MT	BA.2	England	EPI_ISL_12970190	2022-05-16
MT	BA.2	France	EPI_ISL_12995846	2022-05-16
MT	BA.2	Germany	EPI_ISL_12999882	2022-05-16
MT	BA.2	Germany	EPI_ISL_13010033	2022-05-16
MT	BA.2	France	EPI_ISL_13010488	2022-05-16
MT	BA.2	Australia	EPI_ISL_13059313	2022-05-16
MT	BA.2	Scotland	EPI_ISL_13066694	2022-05-16
MT	BA.2	France	EPI_ISL_13069781	2022-05-16
MT	BA.2	USA	EPI_ISL_13117669	2022-05-16
MT	BA.2	USA	EPI_ISL_13120901	2022-05-16
MT	BA.2	USA	EPI_ISL_13145810	2022-05-16
MT	BA.2	USA	EPI_ISL_13194691	2022-05-16
MT	BA.2	Japan	EPI_ISL_13207131	2022-05-16
MT	BA.2	Spain	EPI_ISL_13252166	2022-05-16
MT	BA.2	New_Zealand	EPI_ISL_13437047	2022-05-16
MT	BA.2	Australia	EPI_ISL_13513015	2022-05-16
MT	BA.2	France	EPI_ISL_13521687	2022-05-16
MT	BA.2	Germany	EPI_ISL_13568240	2022-05-16
MT	BA.2	USA	EPI_ISL_15376680	2022-05-16
MT	BA.2	Spain	EPI_ISL_16233073	2022-05-16
MT	BA.2	Brazil	EPI_ISL_18520067	2022-05-16
MT	BA.2	England	EPI_ISL_12970109	2022-05-17
MT	BA.2	Sweden	EPI_ISL_13018544	2022-05-17
MT	BA.2	France	EPI_ISL_13027809	2022-05-17
MT	BA.2	England	EPI_ISL_13048831	2022-05-17
MT	BA.2	USA	EPI_ISL_13074066	2022-05-17
MT	BA.2	Guatemala	EPI_ISL_13096605	2022-05-17
MT	BA.2	USA	EPI_ISL_13116017	2022-05-17
MT	BA.2	USA	EPI_ISL_13118104	2022-05-17
MT	BA.2	USA	EPI_ISL_13128589	2022-05-17
MT	BA.2	USA	EPI_ISL_13170118	2022-05-17
MT	BA.2	Switzerland	EPI_ISL_13251054	2022-05-17
MT	BA.2	Belgium	EPI_ISL_13360757	2022-05-17
MT	BA.2	USA	EPI_ISL_13391951	2022-05-17
MT	BA.2	Germany	EPI_ISL_13568169	2022-05-17
MT	BA.2	Malaysia	EPI_ISL_13990556	2022-05-17
MT	BA.2	Japan	EPI_ISL_14107914	2022-05-17
MT	BA.2	Jamaica	EPI_ISL_14780311	2022-05-17
MT	BA.2	Germany	EPI_ISL_13009538	2022-05-18
MT	BA.2	USA	EPI_ISL_13042578	2022-05-18
MT	BA.2	USA	EPI_ISL_13042898	2022-05-18
MT	BA.2	USA	EPI_ISL_13048020	2022-05-18
MT	BA.2	USA	EPI_ISL_13054914	2022-05-18
MT	BA.2	Germany	EPI_ISL_13237310	2022-05-18
MT	BA.2	Croatia	EPI_ISL_13477679	2022-05-18
MT	BA.2	South_Africa	EPI_ISL_13835253	2022-05-18
MT	BA.2	Japan	EPI_ISL_15152024	2022-05-18
MT	BA.2	Spain	EPI_ISL_16233396	2022-05-18
MT	BA.2	England	EPI_ISL_12919813	2022-05-19
MT	BA.2	Germany	EPI_ISL_13034303	2022-05-19
MT	BA.2	USA	EPI_ISL_13077637	2022-05-19
MT	BA.2	USA	EPI_ISL_13081228	2022-05-19
MT	BA.2	Germany	EPI_ISL_13141979	2022-05-19
MT	BA.2	Wales	EPI_ISL_13157163	2022-05-19
MT	BA.2	Japan	EPI_ISL_13206287	2022-05-19
MT	BA.2	Australia	EPI_ISL_13228085	2022-05-19
MT	BA.2	Germany	EPI_ISL_13237087	2022-05-19
MT	BA.2	Slovenia	EPI_ISL_13253448	2022-05-19
MT	BA.2	USA	EPI_ISL_13335954	2022-05-19
MT	BA.2	Vietnam	EPI_ISL_13358809	2022-05-19
MT	BA.2	New_Zealand	EPI_ISL_13438603	2022-05-19
MT	BA.2	USA	EPI_ISL_13493905	2022-05-19
MT	BA.2	South_Africa	EPI_ISL_13835279	2022-05-19
MT	BA.2	South_Africa	EPI_ISL_13835288	2022-05-19
MT	BA.2	Jordan	EPI_ISL_12977294	2022-05-20
MT	BA.2	Denmark	EPI_ISL_12994977	2022-05-20
MT	BA.2	Germany	EPI_ISL_13014943	2022-05-20
MT	BA.2	USA	EPI_ISL_13078804	2022-05-20
MT	BA.2	Israel	EPI_ISL_13112065	2022-05-20
MT	BA.2	South_Korea	EPI_ISL_13200663	2022-05-20
MT	BA.2	USA	EPI_ISL_13263752	2022-05-20
MT	BA.2	Slovakia	EPI_ISL_13445378	2022-05-20
MT	BA.2	South_Africa	EPI_ISL_13835300	2022-05-20
MT	BA.2	South_Africa	EPI_ISL_13835308	2022-05-20
MT	BA.2	Germany	EPI_ISL_13914321	2022-05-20
MT	BA.2	Austria	EPI_ISL_14514744	2022-05-20
MT	BA.2	Germany	EPI_ISL_13014297	2022-05-21
MT	BA.2	USA	EPI_ISL_13121597	2022-05-21
MT	BA.2	South_Africa	EPI_ISL_13835309	2022-05-21
MT	BA.2	Denmark	EPI_ISL_13068012	2022-05-22
MT	BA.2	USA	EPI_ISL_13098431	2022-05-22
MT	BA.2	England	EPI_ISL_13108028	2022-05-22
MT	BA.2	Norway	EPI_ISL_13202451	2022-05-22
MT	BA.2	Norway	EPI_ISL_13406791	2022-05-22
MT	BA.2	Costa_Rica	EPI_ISL_13631738	2022-05-22
MT	BA.2	Singapore	EPI_ISL_13025915	2022-05-23
MT	BA.2	France	EPI_ISL_13027894	2022-05-23
MT	BA.2	Israel	EPI_ISL_13072638	2022-05-23
MT	BA.2	USA	EPI_ISL_13218094	2022-05-23
MT	BA.2	Austria	EPI_ISL_13234915	2022-05-23
MT	BA.2	Germany	EPI_ISL_13240470	2022-05-23
MT	BA.2	Australia	EPI_ISL_13275905	2022-05-23
MT	BA.2	Germany	EPI_ISL_13279058	2022-05-23
MT	BA.2	France	EPI_ISL_13329573	2022-05-23
MT	BA.2	France	EPI_ISL_13349579	2022-05-23
MT	BA.2	France	EPI_ISL_13371113	2022-05-23
MT	BA.2	France	EPI_ISL_13385026	2022-05-23
MT	BA.2	Norway	EPI_ISL_13406652	2022-05-23
MT	BA.2	Slovakia	EPI_ISL_13432454	2022-05-23
MT	BA.2	USA	EPI_ISL_13456910	2022-05-23
MT	BA.2	Latvia	EPI_ISL_13631367	2022-05-23
MT	BA.2	Reunion	EPI_ISL_13767659	2022-05-23
MT	BA.2	Reunion	EPI_ISL_13767674	2022-05-23
MT	BA.2	Malaysia	EPI_ISL_14663765	2022-05-23
MT	BA.2	Denmark	EPI_ISL_18154971	2022-05-23
MT	BA.2	France	EPI_ISL_13047291	2022-05-24
MT	BA.2	Netherlands	EPI_ISL_13109254	2022-05-24
MT	BA.2	USA	EPI_ISL_13146526	2022-05-24
MT	BA.2	Czech_Republic	EPI_ISL_13158488	2022-05-24
MT	BA.2	Indonesia	EPI_ISL_13174998	2022-05-24
MT	BA.2	South_Korea	EPI_ISL_13200977	2022-05-24
MT	BA.2	Australia	EPI_ISL_13243387	2022-05-24
MT	BA.2	Norway	EPI_ISL_13328019	2022-05-24
MT	BA.2	Puerto_Rico	EPI_ISL_13405742	2022-05-24
MT	BA.2	Puerto_Rico	EPI_ISL_13405746	2022-05-24
MT	BA.2	Spain	EPI_ISL_13489823	2022-05-24
MT	BA.2	USA	EPI_ISL_14104247	2022-05-24
MT	BA.2	Panama	EPI_ISL_14712529	2022-05-24
MT	BA.2	Brazil	EPI_ISL_16410664	2022-05-24
MT	BA.2	England	EPI_ISL_13047947	2022-05-25
MT	BA.2	England	EPI_ISL_13048137	2022-05-25
MT	BA.2	Italy	EPI_ISL_13113708	2022-05-25
MT	BA.2	Canada	EPI_ISL_13135173	2022-05-25
MT	BA.2	Belgium	EPI_ISL_13163964	2022-05-25
MT	BA.2	Austria	EPI_ISL_13209530	2022-05-25
MT	BA.2	Austria	EPI_ISL_13209539	2022-05-25
MT	BA.2	Germany	EPI_ISL_13240368	2022-05-25
MT	BA.2	USA	EPI_ISL_13289737	2022-05-25
MT	BA.2	England	EPI_ISL_13298304	2022-05-25
MT	BA.2	USA	EPI_ISL_13307859	2022-05-25
MT	BA.2	Norway	EPI_ISL_13406843	2022-05-25
MT	BA.2	Georgia	EPI_ISL_13480545	2022-05-25
MT	BA.2	Latvia	EPI_ISL_13631456	2022-05-25
MT	BA.2	Finland	EPI_ISL_13747418	2022-05-25
MT	BA.2	Slovakia	EPI_ISL_13905049	2022-05-25
MT	BA.2	Austria	EPI_ISL_14515647	2022-05-25
MT	BA.2	Israel	EPI_ISL_13077082	2022-05-26
MT	BA.2	India	EPI_ISL_13102645	2022-05-26
MT	BA.2	Australia	EPI_ISL_13107144	2022-05-26
MT	BA.2	USA	EPI_ISL_13114387	2022-05-26
MT	BA.2	England	EPI_ISL_13131459	2022-05-26
MT	BA.2	England	EPI_ISL_13131462	2022-05-26
MT	BA.2	England	EPI_ISL_13131463	2022-05-26
MT	BA.2	England	EPI_ISL_13131465	2022-05-26
MT	BA.2	England	EPI_ISL_13131467	2022-05-26
MT	BA.2	Spain	EPI_ISL_13159985	2022-05-26
MT	BA.2	Thailand	EPI_ISL_13207884	2022-05-26
MT	BA.2	Austria	EPI_ISL_13209535	2022-05-26
MT	BA.2	USA	EPI_ISL_13223081	2022-05-26
MT	BA.2	Germany	EPI_ISL_13235383	2022-05-26
MT	BA.2	Germany	EPI_ISL_13238086	2022-05-26
MT	BA.2	Spain	EPI_ISL_13251583	2022-05-26
MT	BA.2	Italy	EPI_ISL_13300242	2022-05-26
MT	BA.2	USA	EPI_ISL_13364639	2022-05-26
MT	BA.2	USA	EPI_ISL_13415626	2022-05-26
MT	BA.2	Northern_Ireland	EPI_ISL_14022892	2022-05-26
MT	BA.2	Brazil	EPI_ISL_15308979	2022-05-26
MT	BA.2	USA	EPI_ISL_17418441	2022-05-26
MT	BA.2	Denmark	EPI_ISL_13067479	2022-05-27
MT	BA.2	USA	EPI_ISL_13188649	2022-05-27
MT	BA.2	USA	EPI_ISL_13188893	2022-05-27
MT	BA.2	USA	EPI_ISL_13220451	2022-05-27
MT	BA.2	Australia	EPI_ISL_13276139	2022-05-27
MT	BA.2	Estonia	EPI_ISL_13406114	2022-05-27
MT	BA.2	Austria	EPI_ISL_13490685	2022-05-27
MT	BA.2	Turkey	EPI_ISL_13574418	2022-05-27
MT	BA.2	Hong_Kong	EPI_ISL_13694168	2022-05-27
MT	BA.2	England	EPI_ISL_14212189	2022-05-27
MT	BA.2	Germany	EPI_ISL_13246449	2022-05-28
MT	BA.2	Australia	EPI_ISL_13276280	2022-05-28
MT	BA.2	India	EPI_ISL_13307914	2022-05-28
MT	BA.2	Spain	EPI_ISL_13230307	2022-05-29
MT	BA.2	Switzerland	EPI_ISL_13468438	2022-05-29
MT	BA.2	Chile	EPI_ISL_13719568	2022-05-29
MT	BA.2	France	EPI_ISL_13177118	2022-05-30
MT	BA.2	France	EPI_ISL_13177324	2022-05-30
MT	BA.2	Switzerland	EPI_ISL_13202685	2022-05-30
MT	BA.2	Thailand	EPI_ISL_13208029	2022-05-30
MT	BA.2	Germany	EPI_ISL_13235920	2022-05-30
MT	BA.2	Austria	EPI_ISL_13243710	2022-05-30
MT	BA.2	Austria	EPI_ISL_13243715	2022-05-30
MT	BA.2	Austria	EPI_ISL_13243749	2022-05-30
MT	BA.2	France	EPI_ISL_13362913	2022-05-30
MT	BA.2	France	EPI_ISL_13427905	2022-05-30
MT	BA.2	Norway	EPI_ISL_13637224	2022-05-30
MT	BA.2	England	EPI_ISL_13106501	2022-05-31
MT	BA.2	USA	EPI_ISL_13254761	2022-05-31
MT	BA.2	USA	EPI_ISL_13288299	2022-05-31
MT	BA.2	USA	EPI_ISL_13309351	2022-05-31
MT	BA.2	USA	EPI_ISL_13334349	2022-05-31
MT	BA.2	Brazil	EPI_ISL_13411059	2022-05-31
MT	BA.2	Croatia	EPI_ISL_13491498	2022-05-31
MT	BA.2	Japan	EPI_ISL_13565793	2022-05-31
MT	BA.2	France	EPI_ISL_13578717	2022-05-31
MT	BA.2	USA	EPI_ISL_13861058	2022-05-31
MT	BA.2	Germany	EPI_ISL_13912098	2022-05-31
MT	BA.2	Belgium	EPI_ISL_14062638	2022-05-31
MT	BA.2	Spain	EPI_ISL_16240532	2022-05-31
MT	BA.2	Spain	EPI_ISL_16240587	2022-05-31
MT	BA.2	Germany	EPI_ISL_13244671	2022-06-01
MT	BA.2	Germany	EPI_ISL_13248011	2022-06-01
MT	BA.2	USA	EPI_ISL_13310491	2022-06-01
MT	BA.2	USA	EPI_ISL_13310598	2022-06-01
MT	BA.2	Australia	EPI_ISL_13360044	2022-06-01
MT	BA.2	Australia	EPI_ISL_13360049	2022-06-01
MT	BA.2	England	EPI_ISL_13361594	2022-06-01
MT	BA.2	Brazil	EPI_ISL_13410464	2022-06-01
MT	BA.2	Japan	EPI_ISL_13565855	2022-06-01
MT	BA.2	Italy	EPI_ISL_13614746	2022-06-01
MT	BA.2	Brazil	EPI_ISL_14155000	2022-06-01
MT	BA.2	England	EPI_ISL_14212188	2022-06-01
MT	BA.2	Austria	EPI_ISL_14511894	2022-06-01
MT	BA.2	Austria	EPI_ISL_14511910	2022-06-01
MT	BA.2	Spain	EPI_ISL_16240531	2022-06-01
MT	BA.2	Brazil	EPI_ISL_17444781	2022-06-01
MT	BA.2	Mexico	EPI_ISL_18184466	2022-06-01
MT	BA.2	Belgium	EPI_ISL_13167311	2022-06-02
MT	BA.2	Belgium	EPI_ISL_13167312	2022-06-02
MT	BA.2	France	EPI_ISL_13264330	2022-06-02
MT	BA.2	Germany	EPI_ISL_13378137	2022-06-02
MT	BA.2	Australia	EPI_ISL_13458368	2022-06-02
MT	BA.2	Spain	EPI_ISL_13540309	2022-06-02
MT	BA.2	Turkey	EPI_ISL_13574461	2022-06-02
MT	BA.2	France	EPI_ISL_13904494	2022-06-02
MT	BA.2	Georgia	EPI_ISL_16601380	2022-06-02
MT	BA.2	Georgia	EPI_ISL_16601381	2022-06-02
MT	BA.2	Germany	EPI_ISL_13280547	2022-06-03
MT	BA.2	Germany	EPI_ISL_13280561	2022-06-03
MT	BA.2	Israel	EPI_ISL_13301740	2022-06-03
MT	BA.2	USA	EPI_ISL_13305861	2022-06-03
MT	BA.2	Germany	EPI_ISL_13378243	2022-06-03
MT	BA.2	Germany	EPI_ISL_13380790	2022-06-03
MT	BA.2	Germany	EPI_ISL_13383009	2022-06-03
MT	BA.2	Spain	EPI_ISL_13408153	2022-06-03
MT	BA.2	Slovakia	EPI_ISL_13432469	2022-06-03
MT	BA.2	Australia	EPI_ISL_13458085	2022-06-03
MT	BA.2	Germany	EPI_ISL_13378758	2022-06-04
MT	BA.2	Germany	EPI_ISL_13379040	2022-06-04
MT	BA.2	USA	EPI_ISL_13433789	2022-06-04
MT	BA.2	Jamaica	EPI_ISL_14275928	2022-06-04
MT	BA.2	India	EPI_ISL_14410212	2022-06-04
MT	BA.2	Italy	EPI_ISL_16343009	2022-06-04
MT	BA.2	USA	EPI_ISL_13270130	2022-06-05
MT	BA.2	Slovenia	EPI_ISL_13368552	2022-06-05
MT	BA.2	England	EPI_ISL_13475784	2022-06-05
MT	BA.2	Malaysia	EPI_ISL_13622773	2022-06-05
MT	BA.2	Poland	EPI_ISL_13180930	2022-06-06
MT	BA.2	Poland	EPI_ISL_13180931	2022-06-06
MT	BA.2	Poland	EPI_ISL_13180934	2022-06-06
MT	BA.2	Austria	EPI_ISL_13281273	2022-06-06
MT	BA.2	India	EPI_ISL_13342221	2022-06-06
MT	BA.2	USA	EPI_ISL_13343052	2022-06-06
MT	BA.2	France	EPI_ISL_13349780	2022-06-06
MT	BA.2	Germany	EPI_ISL_13378277	2022-06-06
MT	BA.2	India	EPI_ISL_13409375	2022-06-06
MT	BA.2	Mexico	EPI_ISL_13802121	2022-06-06
MT	BA.2	Sweden	EPI_ISL_14232304	2022-06-06
MT	BA.2	Australia	EPI_ISL_13322223	2022-06-07
MT	BA.2	Singapore	EPI_ISL_13360659	2022-06-07
MT	BA.2	France	EPI_ISL_13361993	2022-06-07
MT	BA.2	Germany	EPI_ISL_13386373	2022-06-07
MT	BA.2	Switzerland	EPI_ISL_13436420	2022-06-07
MT	BA.2	USA	EPI_ISL_13533498	2022-06-07
MT	BA.2	Malaysia	EPI_ISL_13622771	2022-06-07
MT	BA.2	Brazil	EPI_ISL_13640327	2022-06-07
MT	BA.2	Slovakia	EPI_ISL_13695381	2022-06-07
MT	BA.2	Germany	EPI_ISL_13941448	2022-06-07
MT	BA.2	Spain	EPI_ISL_14208186	2022-06-07
MT	BA.2	Germany	EPI_ISL_13381719	2022-06-08
MT	BA.2	England	EPI_ISL_13399901	2022-06-08
MT	BA.2	New_Zealand	EPI_ISL_13436678	2022-06-08
MT	BA.2	USA	EPI_ISL_13480623	2022-06-08
MT	BA.2	Slovakia	EPI_ISL_13905165	2022-06-08
MT	BA.2	Colombia	EPI_ISL_15009658	2022-06-08
MT	BA.2	USA	EPI_ISL_15321911	2022-06-08
MT	BA.2	USA	EPI_ISL_15321937	2022-06-08
MT	BA.2	India	EPI_ISL_18624537	2022-06-08
MT	BA.2	India	EPI_ISL_18624538	2022-06-08
MT	BA.2	England	EPI_ISL_13359123	2022-06-09
MT	BA.2	Germany	EPI_ISL_13383502	2022-06-09
MT	BA.2	Israel	EPI_ISL_13428186	2022-06-09
MT	BA.2	Malaysia	EPI_ISL_13622775	2022-06-09
MT	BA.2	Austria	EPI_ISL_13636297	2022-06-09
MT	BA.2	England	EPI_ISL_13338600	2022-06-10
MT	BA.2	England	EPI_ISL_13359356	2022-06-10
MT	BA.2	Canada	EPI_ISL_13410274	2022-06-10
MT	BA.2	Turkey	EPI_ISL_13639849	2022-06-10
MT	BA.2	Finland	EPI_ISL_13692778	2022-06-10
MT	BA.2	Malaysia	EPI_ISL_13900923	2022-06-10
MT	BA.2	Spain	EPI_ISL_16240386	2022-06-10
MT	BA.2	Jamaica	EPI_ISL_17681074	2022-06-10
MT	BA.2	USA	EPI_ISL_13366403	2022-06-11
MT	BA.2	USA	EPI_ISL_13396350	2022-06-11
MT	BA.2	New_Zealand	EPI_ISL_13438857	2022-06-11
MT	BA.2	South_Korea	EPI_ISL_13572143	2022-06-11
MT	BA.2	USA	EPI_ISL_13608326	2022-06-11
MT	BA.2	Canada	EPI_ISL_13856762	2022-06-11
MT	BA.2	Malaysia	EPI_ISL_13900930	2022-06-11
MT	BA.2	Germany	EPI_ISL_14721608	2022-06-11
MT	BA.2	India	EPI_ISL_15193979	2022-06-11
MT	BA.2	Denmark	EPI_ISL_13342330	2022-06-12
MT	BA.2	Switzerland	EPI_ISL_13469964	2022-06-12
MT	BA.2	USA	EPI_ISL_13481569	2022-06-12
MT	BA.2	Germany	EPI_ISL_13927199	2022-06-12
MT	BA.2	USA	EPI_ISL_14794346	2022-06-12
MT	BA.2	Netherlands	EPI_ISL_13393620	2022-06-13
MT	BA.2	India	EPI_ISL_13446547	2022-06-13
MT	BA.2	England	EPI_ISL_13476237	2022-06-13
MT	BA.2	USA	EPI_ISL_13478777	2022-06-13
MT	BA.2	USA	EPI_ISL_13478780	2022-06-13
MT	BA.2	France	EPI_ISL_13580121	2022-06-13
MT	BA.2	Austria	EPI_ISL_13636171	2022-06-13
MT	BA.2	USA	EPI_ISL_13640821	2022-06-13
MT	BA.2	USA	EPI_ISL_13642294	2022-06-13
MT	BA.2	Spain	EPI_ISL_15835660	2022-06-13
MT	BA.2	Belgium	EPI_ISL_13368766	2022-06-14
MT	BA.2	Israel	EPI_ISL_13391259	2022-06-14
MT	BA.2	USA	EPI_ISL_13479134	2022-06-14
MT	BA.2	India	EPI_ISL_13711370	2022-06-14
MT	BA.2	Canada	EPI_ISL_13725392	2022-06-14
MT	BA.2	Colombia	EPI_ISL_13860543	2022-06-14
MT	BA.2	Germany	EPI_ISL_13934964	2022-06-14
MT	BA.2	Sweden	EPI_ISL_14232256	2022-06-14
MT	BA.2	India	EPI_ISL_14410186	2022-06-14
MT	BA.2	Brazil	EPI_ISL_14435565	2022-06-14
MT	BA.2	Thailand	EPI_ISL_14591008	2022-06-14
MT	BA.2	Sweden	EPI_ISL_13470115	2022-06-15
MT	BA.2	Kenya	EPI_ISL_13772968	2022-06-15
MT	BA.2	Slovakia	EPI_ISL_13865206	2022-06-15
MT	BA.2	Germany	EPI_ISL_13921933	2022-06-15
MT	BA.2	Brazil	EPI_ISL_14034168	2022-06-15
MT	BA.2	Sweden	EPI_ISL_14232291	2022-06-15
MT	BA.2	Russia	EPI_ISL_14424696	2022-06-15
MT	BA.2	USA	EPI_ISL_17141235	2022-06-15
MT	BA.2	Togo	EPI_ISL_18273396	2022-06-15
MT	BA.2	USA	EPI_ISL_13483522	2022-06-16
MT	BA.2	Turkey	EPI_ISL_13640087	2022-06-16
MT	BA.2	India	EPI_ISL_13668043	2022-06-16
MT	BA.2	Ireland	EPI_ISL_13774980	2022-06-16
MT	BA.2	India	EPI_ISL_14421660	2022-06-16
MT	BA.2	Belgium	EPI_ISL_13393106	2022-06-17
MT	BA.2	USA	EPI_ISL_13418259	2022-06-17
MT	BA.2	Indonesia	EPI_ISL_13501644	2022-06-17
MT	BA.2	India	EPI_ISL_13502577	2022-06-17
MT	BA.2	India	EPI_ISL_13667117	2022-06-17
MT	BA.2	Germany	EPI_ISL_13922058	2022-06-17
MT	BA.2	Germany	EPI_ISL_14520381	2022-06-17
MT	BA.2	Qatar	EPI_ISL_16076556	2022-06-17
MT	BA.2	India	EPI_ISL_13502528	2022-06-18
MT	BA.2	Georgia	EPI_ISL_13884652	2022-06-18
MT	BA.2	Malaysia	EPI_ISL_14358620	2022-06-18
MT	BA.2	India	EPI_ISL_14408807	2022-06-18
MT	BA.2	Australia	EPI_ISL_13539746	2022-06-19
MT	BA.2	Saint_Lucia	EPI_ISL_13759146	2022-06-19
MT	BA.2	India	EPI_ISL_13981292	2022-06-19
MT	BA.2	Norway	EPI_ISL_14216134	2022-06-19
MT	BA.2	Italy	EPI_ISL_13523452	2022-06-20
MT	BA.2	England	EPI_ISL_13694318	2022-06-20
MT	BA.2	USA	EPI_ISL_13706111	2022-06-20
MT	BA.2	Thailand	EPI_ISL_13711044	2022-06-20
MT	BA.2	France	EPI_ISL_13745187	2022-06-20
MT	BA.2	Spain	EPI_ISL_13825799	2022-06-20
MT	BA.2	India	EPI_ISL_13848061	2022-06-20
MT	BA.2	Slovakia	EPI_ISL_13905184	2022-06-20
MT	BA.2	Norway	EPI_ISL_13966350	2022-06-20
MT	BA.2	France	EPI_ISL_14320861	2022-06-20
MT	BA.2	India	EPI_ISL_14408805	2022-06-20
MT	BA.2	England	EPI_ISL_13498524	2022-06-21
MT	BA.2	England	EPI_ISL_13498573	2022-06-21
MT	BA.2	Germany	EPI_ISL_13570923	2022-06-21
MT	BA.2	USA	EPI_ISL_13625728	2022-06-21
MT	BA.2	Nepal	EPI_ISL_13692507	2022-06-21
MT	BA.2	USA	EPI_ISL_13699891	2022-06-21
MT	BA.2	Mexico	EPI_ISL_13766090	2022-06-21
MT	BA.2	Germany	EPI_ISL_13924670	2022-06-21
MT	BA.2	Iceland	EPI_ISL_14000155	2022-06-21
MT	BA.2	Germany	EPI_ISL_14379435	2022-06-21
MT	BA.2	Denmark	EPI_ISL_13519419	2022-06-22
MT	BA.2	Turkey	EPI_ISL_13620883	2022-06-22
MT	BA.2	USA	EPI_ISL_13624768	2022-06-22
MT	BA.2	Mexico	EPI_ISL_13803061	2022-06-22
MT	BA.2	Finland	EPI_ISL_14304679	2022-06-22
MT	BA.2	Brazil	EPI_ISL_14468766	2022-06-22
MT	BA.2	India	EPI_ISL_18436123	2022-06-22
MT	BA.2	Denmark	EPI_ISL_13573543	2022-06-23
MT	BA.2	France	EPI_ISL_13655171	2022-06-23
MT	BA.2	Australia	EPI_ISL_13787385	2022-06-23
MT	BA.2	France	EPI_ISL_13840740	2022-06-23
MT	BA.2	Slovakia	EPI_ISL_13869213	2022-06-23
MT	BA.2	Czech_Republic	EPI_ISL_13619345	2022-06-24
MT	BA.2	Thailand	EPI_ISL_13750403	2022-06-24
MT	BA.2	Canada	EPI_ISL_13855534	2022-06-24
MT	BA.2	Brazil	EPI_ISL_13971989	2022-06-24
MT	BA.2	Brazil	EPI_ISL_13972035	2022-06-24
MT	BA.2	Spain	EPI_ISL_14051312	2022-06-24
MT	BA.2	India	EPI_ISL_14421720	2022-06-24
MT	BA.2	India	EPI_ISL_15203571	2022-06-24
MT	BA.2	USA	EPI_ISL_15723956	2022-06-24
MT	BA.2	Peru	EPI_ISL_13821226	2022-06-25
MT	BA.2	India	EPI_ISL_13640135	2022-06-26
MT	BA.2	New_Zealand	EPI_ISL_13765233	2022-06-26
MT	BA.2	South_Korea	EPI_ISL_14017076	2022-06-26
MT	BA.2	India	EPI_ISL_14329647	2022-06-26
MT	BA.2	Australia	EPI_ISL_13743803	2022-06-27
MT	BA.2	Slovakia	EPI_ISL_13869201	2022-06-27
MT	BA.2	France	EPI_ISL_13959104	2022-06-27
MT	BA.2	Norway	EPI_ISL_14216043	2022-06-27
MT	BA.2	Germany	EPI_ISL_14413389	2022-06-27
MT	BA.2	France	EPI_ISL_14497782	2022-06-27
MT	BA.2	Malaysia	EPI_ISL_14567497	2022-06-27
MT	BA.2	Russia	EPI_ISL_13638508	2022-06-28
MT	BA.2	Slovakia	EPI_ISL_13869207	2022-06-28
MT	BA.2	Mexico	EPI_ISL_14246243	2022-06-28
MT	BA.2	Germany	EPI_ISL_14522032	2022-06-28
MT	BA.2	Thailand	EPI_ISL_14992613	2022-06-28
MT	BA.2	France	EPI_ISL_13740105	2022-06-29
MT	BA.2	Germany	EPI_ISL_13945625	2022-06-29
MT	BA.2	India	EPI_ISL_14410188	2022-06-29
MT	BA.2	India	EPI_ISL_15421927	2022-06-29
MT	BA.2	Russia	EPI_ISL_15865354	2022-06-29
MT	BA.2	USA	EPI_ISL_16688801	2022-06-29
MT	BA.2	Singapore	EPI_ISL_13819045	2022-06-30
MT	BA.2	Slovakia	EPI_ISL_13869191	2022-06-30
MT	BA.2	Germany	EPI_ISL_13929574	2022-06-30
MT	BA.2	India	EPI_ISL_13989978	2022-06-30
MT	BA.2	India	EPI_ISL_14099267	2022-06-30
MT	BA.2	India	EPI_ISL_14175394	2022-06-30
MT	BA.2	India	EPI_ISL_14487688	2022-06-30
MT	BA.2	Russia	EPI_ISL_15865403	2022-06-30
MT	BA.2	Russia	EPI_ISL_15865417	2022-06-30
MT	BA.2	Germany	EPI_ISL_13937947	2022-07-01
MT	BA.2	Spain	EPI_ISL_14099603	2022-07-01
MT	BA.2	Brazil	EPI_ISL_14208782	2022-07-01
MT	BA.2	Mexico	EPI_ISL_14246192	2022-07-01
MT	BA.2	India	EPI_ISL_14260764	2022-07-01
MT	BA.2	Malaysia	EPI_ISL_14862433	2022-07-01
MT	BA.2	New_Zealand	EPI_ISL_13764024	2022-07-02
MT	BA.2	New_Zealand	EPI_ISL_13765234	2022-07-02
MT	BA.2	Australia	EPI_ISL_13870343	2022-07-02
MT	BA.2	India	EPI_ISL_14260788	2022-07-02
MT	BA.2	India	EPI_ISL_14410178	2022-07-02
MT	BA.2	Brazil	EPI_ISL_14208774	2022-07-03
MT	BA.2	India	EPI_ISL_14260721	2022-07-03
MT	BA.2	India	EPI_ISL_14260734	2022-07-03
MT	BA.2	Malaysia	EPI_ISL_14942894	2022-07-03
MT	BA.2	Poland	EPI_ISL_13697209	2022-07-04
MT	BA.2	India	EPI_ISL_13953676	2022-07-04
MT	BA.2	India	EPI_ISL_14148662	2022-07-04
MT	BA.2	Spain	EPI_ISL_14208435	2022-07-04
MT	BA.2	India	EPI_ISL_14260828	2022-07-04
MT	BA.2	India	EPI_ISL_14260829	2022-07-04
MT	BA.2	Italy	EPI_ISL_17646444	2022-07-04
MT	BA.2	Japan	EPI_ISL_13843028	2022-07-05
MT	BA.2	USA	EPI_ISL_13915160	2022-07-05
MT	BA.2	Spain	EPI_ISL_14727457	2022-07-05
MT	BA.2	India	EPI_ISL_15203562	2022-07-05
MT	BA.2	Australia	EPI_ISL_13871993	2022-07-06
MT	BA.2	India	EPI_ISL_13953682	2022-07-06
MT	BA.2	Brazil	EPI_ISL_14253276	2022-07-06
MT	BA.2	India	EPI_ISL_14402485	2022-07-06
MT	BA.2	Spain	EPI_ISL_14747075	2022-07-06
MT	BA.2	USA	EPI_ISL_13908553	2022-07-07
MT	BA.2	France	EPI_ISL_13985790	2022-07-07
MT	BA.2	India	EPI_ISL_14167179	2022-07-07
MT	BA.2	India	EPI_ISL_14986520	2022-07-07
MT	BA.2	India	EPI_ISL_18373268	2022-07-07
MT	BA.2	Italy	EPI_ISL_14169850	2022-07-08
MT	BA.2	Czech_Republic	EPI_ISL_14175028	2022-07-08
MT	BA.2	Slovakia	EPI_ISL_14199274	2022-07-08
MT	BA.2	India	EPI_ISL_14203520	2022-07-08
MT	BA.2	Norway	EPI_ISL_14215814	2022-07-08
MT	BA.2	India	EPI_ISL_13981314	2022-07-09
MT	BA.2	Spain	EPI_ISL_14257816	2022-07-10
MT	BA.2	India	EPI_ISL_14568787	2022-07-10
MT	BA.2	New_Zealand	EPI_ISL_14634649	2022-07-10
MT	BA.2	India	EPI_ISL_17608962	2022-07-10
MT	BA.2	USA	EPI_ISL_13993440	2022-07-11
MT	BA.2	Costa_Rica	EPI_ISL_14071005	2022-07-11
MT	BA.2	Slovakia	EPI_ISL_14156427	2022-07-11
MT	BA.2	Norway	EPI_ISL_14215818	2022-07-11
MT	BA.2	India	EPI_ISL_14568781	2022-07-11
MT	BA.2	India	EPI_ISL_14568836	2022-07-11
MT	BA.2	Indonesia	EPI_ISL_17964746	2022-07-11
MT	BA.2	Indonesia	EPI_ISL_17964747	2022-07-11
MT	BA.2	Indonesia	EPI_ISL_17964748	2022-07-11
MT	BA.2	Singapore	EPI_ISL_13967221	2022-07-12
MT	BA.2	Colombia	EPI_ISL_14161276	2022-07-12
MT	BA.2	India	EPI_ISL_14568837	2022-07-12
MT	BA.2	India	EPI_ISL_15293930	2022-07-12
MT	BA.2	India	EPI_ISL_15294708	2022-07-12
MT	BA.2	USA	EPI_ISL_14251807	2022-07-13
MT	BA.2	India	EPI_ISL_14356162	2022-07-13
MT	BA.2	India	EPI_ISL_14356165	2022-07-13
MT	BA.2	Slovakia	EPI_ISL_14551628	2022-07-13
MT	BA.2	Russia	EPI_ISL_14160820	2022-07-14
MT	BA.2	India	EPI_ISL_14303124	2022-07-14
MT	BA.2	India	EPI_ISL_14357368	2022-07-14
MT	BA.2	Norway	EPI_ISL_14523429	2022-07-14
MT	BA.2	India	EPI_ISL_15294526	2022-07-15
MT	BA.2	India	EPI_ISL_14357480	2022-07-16
MT	BA.2	USA	EPI_ISL_14183756	2022-07-17
MT	BA.2	USA	EPI_ISL_14267728	2022-07-17
MT	BA.2	USA	EPI_ISL_15378834	2022-07-17
MT	BA.2	Malaysia	EPI_ISL_14368269	2022-07-18
MT	BA.2	India	EPI_ISL_14404265	2022-07-18
MT	BA.2	Slovakia	EPI_ISL_14551609	2022-07-18
MT	BA.2	India	EPI_ISL_14567080	2022-07-18
MT	BA.2	India	EPI_ISL_14568795	2022-07-18
MT	BA.2	India	EPI_ISL_14796165	2022-07-18
MT	BA.2	Thailand	EPI_ISL_15232949	2022-07-18
MT	BA.2	Germany	EPI_ISL_14011475	2022-07-19
MT	BA.2	India	EPI_ISL_14215487	2022-07-19
MT	BA.2	Sweden	EPI_ISL_14227614	2022-07-19
MT	BA.2	Spain	EPI_ISL_14326626	2022-07-19
MT	BA.2	Russia	EPI_ISL_14423349	2022-07-19
MT	BA.2	India	EPI_ISL_14550867	2022-07-19
MT	BA.2	India	EPI_ISL_14550910	2022-07-19
MT	BA.2	Spain	EPI_ISL_14261704	2022-07-20
MT	BA.2	England	EPI_ISL_14300372	2022-07-20
MT	BA.2	Vietnam	EPI_ISL_14356027	2022-07-20
MT	BA.2	Russia	EPI_ISL_14425154	2022-07-20
MT	BA.2	India	EPI_ISL_14550887	2022-07-20
MT	BA.2	India	EPI_ISL_14976004	2022-07-20
MT	BA.2	India	EPI_ISL_15058240	2022-07-20
MT	BA.2	Sweden	EPI_ISL_14228030	2022-07-21
MT	BA.2	India	EPI_ISL_14228529	2022-07-21
MT	BA.2	India	EPI_ISL_14568811	2022-07-21
MT	BA.2	Russia	EPI_ISL_14909157	2022-07-21
MT	BA.2	India	EPI_ISL_15058241	2022-07-21
MT	BA.2	Japan	EPI_ISL_16289654	2022-07-21
MT	BA.2	USA	EPI_ISL_14161024	2022-07-22
MT	BA.2	England	EPI_ISL_14299991	2022-07-22
MT	BA.2	England	EPI_ISL_14301374	2022-07-22
MT	BA.2	India	EPI_ISL_14357525	2022-07-22
MT	BA.2	India	EPI_ISL_14567012	2022-07-22
MT	BA.2	India	EPI_ISL_14567040	2022-07-22
MT	BA.2	India	EPI_ISL_14568805	2022-07-22
MT	BA.2	India	EPI_ISL_14993124	2022-07-22
MT	BA.2	India	EPI_ISL_14993134	2022-07-22
MT	BA.2	India	EPI_ISL_15058183	2022-07-22
MT	BA.2	India	EPI_ISL_15294680	2022-07-22
MT	BA.2	India	EPI_ISL_15422875	2022-07-22
MT	BA.2	India	EPI_ISL_14356429	2022-07-23
MT	BA.2	India	EPI_ISL_14567008	2022-07-23
MT	BA.2	India	EPI_ISL_14567044	2022-07-23
MT	BA.2	India	EPI_ISL_14567067	2022-07-23
MT	BA.2	Canada	EPI_ISL_14765716	2022-07-23
MT	BA.2	India	EPI_ISL_14796166	2022-07-23
MT	BA.2	India	EPI_ISL_14933122	2022-07-23
MT	BA.2	India	EPI_ISL_14937542	2022-07-23
MT	BA.2	India	EPI_ISL_14291320	2022-07-24
MT	BA.2	India	EPI_ISL_14396983	2022-07-24
MT	BA.2	Sweden	EPI_ISL_14545270	2022-07-24
MT	BA.2	USA	EPI_ISL_14576837	2022-07-25
MT	BA.2	India	EPI_ISL_14890941	2022-07-25
MT	BA.2	India	EPI_ISL_14915253	2022-07-25
MT	BA.2	Denmark	EPI_ISL_14197724	2022-07-26
MT	BA.2	Argentina	EPI_ISL_14525301	2022-07-26
MT	BA.2	Scotland	EPI_ISL_14573015	2022-07-26
MT	BA.2	India	EPI_ISL_14993188	2022-07-26
MT	BA.2	India	EPI_ISL_14993190	2022-07-26
MT	BA.2	France	EPI_ISL_15509746	2022-07-26
MT	BA.2	Thailand	EPI_ISL_18496421	2022-07-26
MT	BA.2	India	EPI_ISL_14396972	2022-07-27
MT	BA.2	Australia	EPI_ISL_14467169	2022-07-27
MT	BA.2	Sweden	EPI_ISL_14544667	2022-07-27
MT	BA.2	India	EPI_ISL_14993203	2022-07-27
MT	BA.2	Egypt	EPI_ISL_18138821	2022-07-27
MT	BA.2	India	EPI_ISL_14585654	2022-07-28
MT	BA.2	India	EPI_ISL_14445799	2022-07-29
MT	BA.2	India	EPI_ISL_15295075	2022-07-29
MT	BA.2	India	EPI_ISL_14910709	2022-07-30
MT	BA.2	India	EPI_ISL_14993149	2022-07-30
MT	BA.2	Indonesia	EPI_ISL_14569950	2022-07-31
MT	BA.2	India	EPI_ISL_14796351	2022-08-01
MT	BA.2	India	EPI_ISL_14910670	2022-08-01
MT	BA.2	India	EPI_ISL_14910740	2022-08-01
MT	BA.2	India	EPI_ISL_15057956	2022-08-01
MT	BA.2	France	EPI_ISL_15509755	2022-08-01
MT	BA.2	India	EPI_ISL_15757263	2022-08-01
MT	BA.2	Austria	EPI_ISL_14355586	2022-08-02
MT	BA.2	Germany	EPI_ISL_14694040	2022-08-02
MT	BA.2	India	EPI_ISL_14726667	2022-08-02
MT	BA.2	Russia	EPI_ISL_14937654	2022-08-02
MT	BA.2	USA	EPI_ISL_15049027	2022-08-02
MT	BA.2	India	EPI_ISL_15757269	2022-08-02
MT	BA.2	India	EPI_ISL_15757272	2022-08-02
MT	BA.2	France	EPI_ISL_14517885	2022-08-03
MT	BA.2	Thailand	EPI_ISL_14725600	2022-08-03
MT	BA.2	Norway	EPI_ISL_14773569	2022-08-03
MT	BA.2	India	EPI_ISL_14910715	2022-08-03
MT	BA.2	India	EPI_ISL_14910728	2022-08-03
MT	BA.2	India	EPI_ISL_14910732	2022-08-03
MT	BA.2	India	EPI_ISL_15058001	2022-08-03
MT	BA.2	India	EPI_ISL_15757285	2022-08-03
MT	BA.2	India	EPI_ISL_15757286	2022-08-03
MT	BA.2	Spain	EPI_ISL_14683500	2022-08-04
MT	BA.2	India	EPI_ISL_14910697	2022-08-04
MT	BA.2	India	EPI_ISL_14910711	2022-08-04
MT	BA.2	India	EPI_ISL_14987900	2022-08-04
MT	BA.2	India	EPI_ISL_15057987	2022-08-04
MT	BA.2	India	EPI_ISL_15294750	2022-08-04
MT	BA.2	India	EPI_ISL_15294752	2022-08-04
MT	BA.2	India	EPI_ISL_15294853	2022-08-04
MT	BA.2	India	EPI_ISL_15332216	2022-08-04
MT	BA.2	India	EPI_ISL_15757297	2022-08-04
MT	BA.2	India	EPI_ISL_15757298	2022-08-04
MT	BA.2	Russia	EPI_ISL_14901672	2022-08-05
MT	BA.2	India	EPI_ISL_14910729	2022-08-05
MT	BA.2	India	EPI_ISL_15057998	2022-08-05
MT	BA.2	Nepal	EPI_ISL_15313035	2022-08-05
MT	BA.2	India	EPI_ISL_15617377	2022-08-05
MT	BA.2	India	EPI_ISL_15622770	2022-08-05
MT	BA.2	India	EPI_ISL_14814411	2022-08-06
MT	BA.2	India	EPI_ISL_14814412	2022-08-07
MT	BA.2	India	EPI_ISL_14891602	2022-08-08
MT	BA.2	India	EPI_ISL_15057964	2022-08-08
MT	BA.2	India	EPI_ISL_15057970	2022-08-08
MT	BA.2	India	EPI_ISL_15057985	2022-08-08
MT	BA.2	India	EPI_ISL_15153190	2022-08-08
MT	BA.2	Spain	EPI_ISL_15193406	2022-08-08
MT	BA.2	Germany	EPI_ISL_15404042	2022-08-08
MT	BA.2	India	EPI_ISL_15757306	2022-08-08
MT	BA.2	Malaysia	EPI_ISL_15819759	2022-08-08
MT	BA.2	India	EPI_ISL_14923289	2022-08-09
MT	BA.2	India	EPI_ISL_15057984	2022-08-09
MT	BA.2	India	EPI_ISL_15057966	2022-08-11
MT	BA.2	USA	EPI_ISL_15182041	2022-08-11
MT	BA.2	India	EPI_ISL_15308452	2022-08-11
MT	BA.2	Malaysia	EPI_ISL_15333177	2022-08-11
MT	BA.2	Denmark	EPI_ISL_14494833	2022-08-12
MT	BA.2	England	EPI_ISL_14618772	2022-08-12
MT	BA.2	India	EPI_ISL_14923290	2022-08-12
MT	BA.2	India	EPI_ISL_18740563	2022-08-12
MT	BA.2	India	EPI_ISL_18740566	2022-08-12
MT	BA.2	India	EPI_ISL_18819872	2022-08-12
MT	BA.2	India	EPI_ISL_18819946	2022-08-12
MT	BA.2	India	EPI_ISL_18819949	2022-08-12
MT	BA.2	Nepal	EPI_ISL_15313047	2022-08-14
MT	BA.2	Pakistan	EPI_ISL_15349687	2022-08-14
MT	BA.2	Germany	EPI_ISL_14694460	2022-08-15
MT	BA.2	Nepal	EPI_ISL_15313044	2022-08-15
MT	BA.2	Spain	EPI_ISL_14835031	2022-08-16
MT	BA.2	India	EPI_ISL_14923216	2022-08-16
MT	BA.2	India	EPI_ISL_15310150	2022-08-17
MT	BA.2	India	EPI_ISL_14910699	2022-08-18
MT	BA.2	India	EPI_ISL_14910747	2022-08-18
MT	BA.2	Canada	EPI_ISL_14985316	2022-08-18
MT	BA.2	India	EPI_ISL_15294910	2022-08-18
MT	BA.2	Italy	EPI_ISL_14665394	2022-08-19
MT	BA.2	India	EPI_ISL_14910809	2022-08-19
MT	BA.2	India	EPI_ISL_15073964	2022-08-19
MT	BA.2	India	EPI_ISL_17424755	2022-08-19
MT	BA.2	USA	EPI_ISL_14849439	2022-08-20
MT	BA.2	Spain	EPI_ISL_14700285	2022-08-22
MT	BA.2	India	EPI_ISL_14910686	2022-08-22
MT	BA.2	Qatar	EPI_ISL_16077066	2022-08-22
MT	BA.2	Egypt	EPI_ISL_16299739	2022-08-22
MT	BA.2	India	EPI_ISL_15153261	2022-08-23
MT	BA.2	India	EPI_ISL_15308503	2022-08-23
MT	BA.2	India	EPI_ISL_15617503	2022-08-23
MT	BA.2	India	EPI_ISL_15754306	2022-08-23
MT	BA.2	Netherlands	EPI_ISL_14807145	2022-08-24
MT	BA.2	Italy	EPI_ISL_15088435	2022-08-24
MT	BA.2	India	EPI_ISL_15153260	2022-08-24
MT	BA.2	Nepal	EPI_ISL_15313030	2022-08-24
MT	BA.2	Spain	EPI_ISL_15420138	2022-08-25
MT	BA.2	Indonesia	EPI_ISL_18734528	2022-08-26
MT	BA.2	India	EPI_ISL_15153269	2022-08-27
MT	BA.2	Malaysia	EPI_ISL_15670053	2022-08-27
MT	BA.2	France	EPI_ISL_14949065	2022-08-29
MT	BA.2	India	EPI_ISL_15073998	2022-08-29
MT	BA.2	Canada	EPI_ISL_15184330	2022-08-29
MT	BA.2	Kuwait	EPI_ISL_16201275	2022-08-30
MT	BA.2	USA	EPI_ISL_14982716	2022-08-31
MT	BA.2	USA	EPI_ISL_14983279	2022-09-01
MT	BA.2	Germany	EPI_ISL_15903600	2022-09-01
MT	BA.2	India	EPI_ISL_15961802	2022-09-01
MT	BA.2	USA	EPI_ISL_15042972	2022-09-03
MT	BA.2	India	EPI_ISL_15231529	2022-09-03
MT	BA.2	India	EPI_ISL_14987890	2022-09-05
MT	BA.2	Nepal	EPI_ISL_15313054	2022-09-05
MT	BA.2	Nepal	EPI_ISL_15313060	2022-09-05
MT	BA.2	Malaysia	EPI_ISL_16046997	2022-09-05
MT	BA.2	India	EPI_ISL_15073993	2022-09-06
MT	BA.2	India	EPI_ISL_16280770	2022-09-07
[truncated: 5,761 more rows]

## Sheet: Supplementary Table 6
D4
FG/BG/MT	Pango Lineage	Country	EPI_ISL	Date
MT	BA.2	India	EPI_ISL_14814434	2022-01-10
MT	BA.2	India	EPI_ISL_14814438	2022-01-18
MT	BA.2	Germany	EPI_ISL_9862291	2022-01-25
MT	BA.2	Germany	EPI_ISL_11601417	2022-01-28
MT	BA.2	India	EPI_ISL_10369398	2022-02-03
MT	BA.2	India	EPI_ISL_10065810	2022-02-04
MT	BA.2	Germany	EPI_ISL_10290068	2022-02-08
MT	BA.2	Germany	EPI_ISL_11822452	2022-02-10
MT	BA.2	Scotland	EPI_ISL_10051320	2022-02-11
MT	BA.2	India	EPI_ISL_10523055	2022-02-17
MT	BA.2	France	EPI_ISL_11223456	2022-02-17
MT	BA.2	Denmark	EPI_ISL_10319591	2022-02-19
MT	BA.2	Germany	EPI_ISL_10904602	2022-02-22
MT	BA.2	Germany	EPI_ISL_12153320	2022-02-25
MT	BA.2	South_Korea	EPI_ISL_11405687	2022-02-28
MT	BA.2	India	EPI_ISL_13499606	2022-02-28
MT	BA.2	Sweden	EPI_ISL_11094154	2022-03-01
MT	BA.2	Indonesia	EPI_ISL_12559839	2022-03-08
MT	BA.2	Malaysia	EPI_ISL_18821480	2022-03-11
MT	BA.2	Malaysia	EPI_ISL_18821483	2022-03-11
MT	BA.2	Malaysia	EPI_ISL_18821484	2022-03-11
MT	BA.2	Malaysia	EPI_ISL_18821485	2022-03-11
MT	BA.2	Malaysia	EPI_ISL_18821486	2022-03-11
MT	BA.2	Malaysia	EPI_ISL_18821487	2022-03-11
MT	BA.2	Malaysia	EPI_ISL_18821489	2022-03-11
MT	BA.2	Malaysia	EPI_ISL_18821490	2022-03-11
MT	BA.2	Malaysia	EPI_ISL_18821491	2022-03-11
MT	BA.2	Malaysia	EPI_ISL_18821492	2022-03-11
MT	BA.2	Malaysia	EPI_ISL_18821494	2022-03-11
MT	BA.2	Germany	EPI_ISL_11478892	2022-03-14
MT	BA.2	Germany	EPI_ISL_11817217	2022-03-18
MT	BA.2	Canary_Islands	EPI_ISL_16282414	2022-03-21
MT	BA.2	Denmark	EPI_ISL_11787000	2022-03-22
MT	BA.2	Germany	EPI_ISL_11820394	2022-03-22
MT	BA.2	Scotland	EPI_ISL_11774809	2022-03-27
MT	BA.2	France	EPI_ISL_12076663	2022-03-30
MT	BA.2	Germany	EPI_ISL_13925430	2022-03-30
MT	BA.2	England	EPI_ISL_18063522	2022-03-31
MT	BA.2	England	EPI_ISL_12106088	2022-04-03
MT	BA.2	France	EPI_ISL_12248914	2022-04-04
MT	BA.2	Croatia	EPI_ISL_12491172	2022-04-04
MT	BA.2	Germany	EPI_ISL_12194624	2022-04-06
MT	BA.2	Germany	EPI_ISL_12194613	2022-04-07
MT	BA.2	Turkey	EPI_ISL_12584007	2022-04-07
MT	BA.2	Germany	EPI_ISL_12522144	2022-04-09
MT	BA.2	Spain	EPI_ISL_13092554	2022-04-09
MT	BA.2	Germany	EPI_ISL_12362554	2022-04-10
MT	BA.2	Australia	EPI_ISL_12434379	2022-04-10
MT	BA.2	India	EPI_ISL_12223742	2022-04-11
MT	BA.2	Germany	EPI_ISL_12528818	2022-04-12
MT	BA.2	Malaysia	EPI_ISL_14663818	2022-04-16
MT	BA.2	India	EPI_ISL_12559499	2022-04-19
MT	BA.2	Norway	EPI_ISL_12809756	2022-04-20
MT	BA.2	England	EPI_ISL_12428985	2022-04-21
MT	BA.2	USA	EPI_ISL_12759653	2022-04-21
MT	BA.2	Thailand	EPI_ISL_13276660	2022-04-25
MT	BA.2	France	EPI_ISL_13330554	2022-04-25
MT	BA.2	Belgium	EPI_ISL_12456455	2022-04-26
MT	BA.2	Spain	EPI_ISL_13092906	2022-04-26
MT	BA.2	Australia	EPI_ISL_12701701	2022-04-30
MT	BA.2	Germany	EPI_ISL_13925435	2022-04-30
MT	BA.2	USA	EPI_ISL_12691470	2022-05-02
MT	BA.2	USA	EPI_ISL_15709541	2022-05-02
MT	BA.2	Cameroon	EPI_ISL_16985973	2022-05-02
MT	BA.2	Germany	EPI_ISL_13011072	2022-05-04
MT	BA.2	India	EPI_ISL_13697151	2022-05-06
MT	BA.2	England	EPI_ISL_12772370	2022-05-10
MT	BA.2	Ireland	EPI_ISL_13951645	2022-05-10
MT	BA.2	Belgium	EPI_ISL_12712879	2022-05-12
MT	BA.2	Latvia	EPI_ISL_13631305	2022-05-12
MT	BA.2	USA	EPI_ISL_13859857	2022-05-12
MT	BA.2	Germany	EPI_ISL_13015192	2022-05-13
MT	BA.2	India	EPI_ISL_13794597	2022-05-13
MT	BA.2	Australia	EPI_ISL_13059313	2022-05-16
MT	BA.2	Switzerland	EPI_ISL_13251054	2022-05-17
MT	BA.2	USA	EPI_ISL_13054914	2022-05-18
MT	BA.2	England	EPI_ISL_12919813	2022-05-19
MT	BA.2	Vietnam	EPI_ISL_13358809	2022-05-19
MT	BA.2	USA	EPI_ISL_13493905	2022-05-19
MT	BA.2	South_Korea	EPI_ISL_13200663	2022-05-20
MT	BA.2	Germany	EPI_ISL_13240470	2022-05-23
MT	BA.2	Germany	EPI_ISL_13279058	2022-05-23
MT	BA.2	Denmark	EPI_ISL_18154971	2022-05-23
MT	BA.2	Puerto_Rico	EPI_ISL_13405742	2022-05-24
MT	BA.2	Spain	EPI_ISL_13489823	2022-05-24
MT	BA.2	Panama	EPI_ISL_14712529	2022-05-24
MT	BA.2	Belgium	EPI_ISL_13163964	2022-05-25
MT	BA.2	India	EPI_ISL_13102645	2022-05-26
MT	BA.2	Australia	EPI_ISL_13107144	2022-05-26
MT	BA.2	Austria	EPI_ISL_13490685	2022-05-27
MT	BA.2	India	EPI_ISL_13307914	2022-05-28
MT	BA.2	Chile	EPI_ISL_13719568	2022-05-29
MT	BA.2	Germany	EPI_ISL_13235920	2022-05-30
MT	BA.2	France	EPI_ISL_13578717	2022-05-31
MT	BA.2	USA	EPI_ISL_13861058	2022-05-31
MT	BA.2	Germany	EPI_ISL_13912098	2022-05-31
MT	BA.2	Germany	EPI_ISL_13380790	2022-06-03
MT	BA.2	India	EPI_ISL_14410212	2022-06-04
MT	BA.2	USA	EPI_ISL_13270130	2022-06-05
MT	BA.2	Australia	EPI_ISL_13322223	2022-06-07
MT	BA.2	Germany	EPI_ISL_13386373	2022-06-07
MT	BA.2	Switzerland	EPI_ISL_13436420	2022-06-07
MT	BA.2	Brazil	EPI_ISL_13640327	2022-06-07
MT	BA.2	Malaysia	EPI_ISL_13900923	2022-06-10
MT	BA.2	Canada	EPI_ISL_13725392	2022-06-14
MT	BA.2	Germany	EPI_ISL_13934964	2022-06-14
MT	BA.2	India	EPI_ISL_14410186	2022-06-14
MT	BA.2	USA	EPI_ISL_17141235	2022-06-15
MT	BA.2	Turkey	EPI_ISL_13640087	2022-06-16
MT	BA.2	Ireland	EPI_ISL_13774980	2022-06-16
MT	BA.2	India	EPI_ISL_13502528	2022-06-18
MT	BA.2	Malaysia	EPI_ISL_14358620	2022-06-18
MT	BA.2	Australia	EPI_ISL_13539746	2022-06-19
MT	BA.2	Norway	EPI_ISL_14216134	2022-06-19
MT	BA.2	France	EPI_ISL_13745187	2022-06-20
MT	BA.2	India	EPI_ISL_14408805	2022-06-20
MT	BA.2	Iceland	EPI_ISL_14000155	2022-06-21
MT	BA.2	Denmark	EPI_ISL_13519419	2022-06-22
MT	BA.2	Denmark	EPI_ISL_13573543	2022-06-23
MT	BA.2	Australia	EPI_ISL_13787385	2022-06-23
MT	BA.2	Norway	EPI_ISL_14216043	2022-06-27
MT	BA.2	Russia	EPI_ISL_15865354	2022-06-29
MT	BA.2	India	EPI_ISL_13989978	2022-06-30
MT	BA.2	Malaysia	EPI_ISL_14862433	2022-07-01
MT	BA.2	New_Zealand	EPI_ISL_13764024	2022-07-02
MT	BA.2	India	EPI_ISL_14410178	2022-07-02
MT	BA.2	Brazil	EPI_ISL_14208774	2022-07-03
MT	BA.2	India	EPI_ISL_14148662	2022-07-04
MT	BA.2	India	EPI_ISL_13953682	2022-07-06
MT	BA.2	France	EPI_ISL_13985790	2022-07-07
MT	BA.2	Czech_Republic	EPI_ISL_14175028	2022-07-08
MT	BA.2	Norway	EPI_ISL_14215814	2022-07-08
MT	BA.2	USA	EPI_ISL_13993440	2022-07-11
MT	BA.2	India	EPI_ISL_14568836	2022-07-11
MT	BA.2	India	EPI_ISL_15293930	2022-07-12
MT	BA.2	India	EPI_ISL_14356165	2022-07-13
MT	BA.2	USA	EPI_ISL_15378834	2022-07-17
MT	BA.2	India	EPI_ISL_14404265	2022-07-18
MT	BA.2	India	EPI_ISL_14567080	2022-07-18
MT	BA.2	Germany	EPI_ISL_14011475	2022-07-19
MT	BA.2	Spain	EPI_ISL_14261704	2022-07-20
MT	BA.2	Russia	EPI_ISL_14425154	2022-07-20
MT	BA.2	India	EPI_ISL_15058240	2022-07-20
MT	BA.2	India	EPI_ISL_14228529	2022-07-21
MT	BA.2	Japan	EPI_ISL_16289654	2022-07-21
MT	BA.2	India	EPI_ISL_15422875	2022-07-22
MT	BA.2	India	EPI_ISL_14567008	2022-07-23
MT	BA.2	India	EPI_ISL_14933122	2022-07-23
MT	BA.2	Sweden	EPI_ISL_14545270	2022-07-24
MT	BA.2	India	EPI_ISL_14915253	2022-07-25
MT	BA.2	Argentina	EPI_ISL_14525301	2022-07-26
MT	BA.2	Scotland	EPI_ISL_14573015	2022-07-26
MT	BA.2	Australia	EPI_ISL_14467169	2022-07-27
MT	BA.2	India	EPI_ISL_14910670	2022-08-01
MT	BA.2	Thailand	EPI_ISL_14725600	2022-08-03
MT	BA.2	India	EPI_ISL_14910728	2022-08-03
MT	BA.2	Spain	EPI_ISL_14683500	2022-08-04
MT	BA.2	India	EPI_ISL_14987900	2022-08-04
MT	BA.2	India	EPI_ISL_15294752	2022-08-04
MT	BA.2	Russia	EPI_ISL_14901672	2022-08-05
MT	BA.2	India	EPI_ISL_14814412	2022-08-07
MT	BA.2	India	EPI_ISL_14891602	2022-08-08
MT	BA.2	India	EPI_ISL_15057970	2022-08-08
MT	BA.2	India	EPI_ISL_15153190	2022-08-08
MT	BA.2	England	EPI_ISL_14618772	2022-08-12
MT	BA.2	Spain	EPI_ISL_14835031	2022-08-16
MT	BA.2	India	EPI_ISL_14923216	2022-08-16
MT	BA.2	USA	EPI_ISL_14849439	2022-08-20
MT	BA.2	Spain	EPI_ISL_14700285	2022-08-22
MT	BA.2	Qatar	EPI_ISL_16077066	2022-08-22
MT	BA.2	India	EPI_ISL_15153261	2022-08-23
MT	BA.2	India	EPI_ISL_15617503	2022-08-23
MT	BA.2	India	EPI_ISL_15754306	2022-08-23
MT	BA.2	India	EPI_ISL_15153269	2022-08-27
MT	BA.2	France	EPI_ISL_14949065	2022-08-29
MT	BA.2	Kuwait	EPI_ISL_16201275	2022-08-30
MT	BA.2	Nepal	EPI_ISL_15313054	2022-09-05
MT	BA.2	Nepal	EPI_ISL_15313060	2022-09-05
MT	BA.2	Malaysia	EPI_ISL_16046997	2022-09-05
MT	BA.2	Switzerland	EPI_ISL_15063588	2022-09-08
MT	BA.2	USA	EPI_ISL_15093244	2022-09-12
MT	BA.2	Norway	EPI_ISL_15191714	2022-09-12
MT	BA.2	New_Zealand	EPI_ISL_15277675	2022-09-12
MT	BA.2	India	EPI_ISL_15350790	2022-09-12
MT	BA.2	India	EPI_ISL_15617482	2022-09-17
MT	BA.2	India	EPI_ISL_15231508	2022-09-21
MT	BA.2	Russia	EPI_ISL_17740503	2022-09-25
MT	BA.2	Germany	EPI_ISL_15523591	2022-09-27
MT	BA.2	India	EPI_ISL_15614947	2022-09-27
MT	BA.2	India	EPI_ISL_15617407	2022-09-28
MT	BA.2	India	EPI_ISL_16183022	2022-09-30
MT	BA.2	India	EPI_ISL_15854994	2022-10-03
MT	BA.2	Sweden	EPI_ISL_15725799	2022-10-10
MT	BA.2	Ireland	EPI_ISL_15839601	2022-10-11
MT	BA.2	Australia	EPI_ISL_15533064	2022-10-13
MT	BA.2	Norway	EPI_ISL_17210689	2022-10-13
MT	BA.2	Germany	EPI_ISL_15644391	2022-10-14
MT	BA.2	India	EPI_ISL_15854941	2022-10-14
MT	BA.2	Spain	EPI_ISL_15494897	2022-10-17
MT	BA.2	Indonesia	EPI_ISL_15542409	2022-10-17
MT	BA.2	India	EPI_ISL_16350706	2022-10-17
MT	BA.2	Malaysia	EPI_ISL_15671878	2022-10-19
MT	BA.2	India	EPI_ISL_16372276	2022-10-24
MT	BA.2	Denmark	EPI_ISL_18156519	2022-10-24
MT	BA.2	England	EPI_ISL_15760812	2022-10-28
MT	BA.2	USA	EPI_ISL_15711313	2022-10-31
MT	BA.2	Thailand	EPI_ISL_16019056	2022-11-06
MT	BA.2	Russia	EPI_ISL_15920181	2022-11-07
MT	BA.2	England	EPI_ISL_15910198	2022-11-10
MT	BA.2	Spain	EPI_ISL_16245232	2022-11-12
MT	BA.2	Spain	EPI_ISL_16245627	2022-11-14
MT	BA.2	South_Africa	EPI_ISL_16060790	2022-11-15
MT	BA.2	Germany	EPI_ISL_16452054	2022-11-15
MT	BA.2	Australia	EPI_ISL_16394922	2022-11-16
MT	BA.2	USA	EPI_ISL_17271618	2022-11-16
MT	BA.2	India	EPI_ISL_16259781	2022-11-18
MT	BA.2	Malaysia	EPI_ISL_16180348	2022-11-19
MT	BA.2	Mauritius	EPI_ISL_16741242	2022-11-24
MT	BA.2	Denmark	EPI_ISL_16062229	2022-11-25
MT	BA.2	USA	EPI_ISL_16012841	2022-11-27
MT	BA.2	USA	EPI_ISL_16012710	2022-11-28
MT	BA.2	USA	EPI_ISL_16130518	2022-11-28
MT	BA.2	India	EPI_ISL_17349770	2022-11-28
MT	BA.2	France	EPI_ISL_16283854	2022-11-29
MT	BA.2	Indonesia	EPI_ISL_16532069	2022-12-01
MT	BA.2	Spain	EPI_ISL_16384522	2022-12-05
MT	BA.2	Turkey	EPI_ISL_16424130	2022-12-05
MT	BA.2	Germany	EPI_ISL_16218620	2022-12-09
MT	BA.2	Austria	EPI_ISL_16561181	2022-12-13
MT	BA.2	South_Africa	EPI_ISL_17885128	2022-12-13
MT	BA.2	Mexico	EPI_ISL_16735623	2022-12-14
MT	BA.2	Germany	EPI_ISL_16328920	2022-12-15
MT	BA.2	Puerto_Rico	EPI_ISL_17347921	2022-12-15
MT	BA.2	Germany	EPI_ISL_16396200	2022-12-17
MT	BA.2	New_Zealand	EPI_ISL_16435601	2022-12-19
MT	BA.2	Austria	EPI_ISL_16550725	2022-12-19
MT	BA.2	Austria	EPI_ISL_16550726	2022-12-19
MT	BA.2	USA	EPI_ISL_16757168	2022-12-20
MT	BA.2	USA	EPI_ISL_16398035	2022-12-21
MT	BA.2	Spain	EPI_ISL_17214826	2022-12-21
MT	BA.2	Spain	EPI_ISL_16474400	2022-12-22
MT	BA.2	Italy	EPI_ISL_16612088	2022-12-22
MT	BA.2	India	EPI_ISL_16462642	2022-12-23
MT	BA.2	Malaysia	EPI_ISL_17037254	2022-12-23
MT	BA.2	Denmark	EPI_ISL_16457740	2022-12-24
MT	BA.2	Germany	EPI_ISL_16487401	2022-12-26
MT	BA.2	Israel	EPI_ISL_16548869	2022-12-28
MT	BA.2	India	EPI_ISL_16942155	2022-12-29
MT	BA.2	Sweden	EPI_ISL_17527160	2022-12-29
MT	BA.2	Belgium	EPI_ISL_17092260	2023-01-02
MT	BA.2	USA	EPI_ISL_16542938	2023-01-05
MT	BA.2	Ireland	EPI_ISL_16641597	2023-01-05
MT	BA.2	Brazil	EPI_ISL_16966997	2023-01-05
MT	BA.2	USA	EPI_ISL_16599747	2023-01-06
MT	BA.2	USA	EPI_ISL_18503348	2023-01-09
MT	BA.2	Germany	EPI_ISL_16695435	2023-01-10
MT	BA.2	USA	EPI_ISL_16599325	2023-01-11
MT	BA.2	India	EPI_ISL_16823204	2023-01-12
MT	BA.2	USA	EPI_ISL_16731648	2023-01-15
MT	BA.2	Italy	EPI_ISL_16740232	2023-01-16
MT	BA.2	USA	EPI_ISL_16762462	2023-01-17
MT	BA.2	Thailand	EPI_ISL_17837188	2023-01-17
MT	BA.2	Uganda	EPI_ISL_18075887	2023-01-18
MT	BA.2	USA	EPI_ISL_16762028	2023-01-20
MT	BA.2	India	EPI_ISL_16946783	2023-01-23
MT	BA.2	Italy	EPI_ISL_16997077	2023-01-23
MT	BA.2	USA	EPI_ISL_16762309	2023-01-24
MT	BA.2	USA	EPI_ISL_16762249	2023-01-25
MT	BA.2	USA	EPI_ISL_16919448	2023-01-27
MT	BA.2	Malaysia	EPI_ISL_16947625	2023-01-27
MT	BA.2	USA	EPI_ISL_16919845	2023-01-30
MT	BA.2	USA	EPI_ISL_16919851	2023-01-31
MT	BA.2	South_Korea	EPI_ISL_17090268	2023-02-02
MT	BA.2	Germany	EPI_ISL_16940158	2023-02-03
MT	BA.2	USA	EPI_ISL_16944924	2023-02-05
MT	BA.2	Colombia	EPI_ISL_17183670	2023-02-08
MT	BA.2	Germany	EPI_ISL_17003534	2023-02-13
MT	BA.2	USA	EPI_ISL_18289102	2023-02-14
MT	BA.2	Germany	EPI_ISL_17069345	2023-02-16
MT	BA.2	Germany	EPI_ISL_17253963	2023-02-16
MT	BA.2	South_Korea	EPI_ISL_17164579	2023-02-17
MT	BA.2	Germany	EPI_ISL_17177222	2023-02-19
MT	BA.2	France	EPI_ISL_17036225	2023-02-20
MT	BA.2	Germany	EPI_ISL_17175569	2023-02-20
MT	BA.2	Indonesia	EPI_ISL_17683902	2023-02-25
MT	BA.2	Germany	EPI_ISL_17255807	2023-02-28
MT	BA.2	Germany	EPI_ISL_17255840	2023-02-28
MT	BA.2	Germany	EPI_ISL_17256234	2023-02-28
BG	BA.2	Japan	EPI_ISL_17104941	2023-03-01
BG	BA.2	India	EPI_ISL_17372412	2023-03-01
BG	BA.2	Australia	EPI_ISL_17824611	2023-03-01
MT	BA.2	Turkey	EPI_ISL_18228596	2023-03-01
BG	BA.2	Germany	EPI_ISL_17256091	2023-03-03
BG	CH.1.1	Germany	EPI_ISL_17256241	2023-03-03
BG	XBB.1.5	Italy	EPI_ISL_17187033	2023-03-03
MT	BA.2	Singapore	EPI_ISL_17207424	2023-03-03
MT	BA.2	Germany	EPI_ISL_17256261	2023-03-03
BG	BA.2	India	EPI_ISL_17372416	2023-03-06
BG	BA.2	Chile	EPI_ISL_17861626	2023-03-06
BG	BA.2.75	Portugal	EPI_ISL_17242733	2023-03-07
BG	BA.2	India	EPI_ISL_17372414	2023-03-09
BG	BA.2.75	China	EPI_ISL_17494488	2023-03-10
BG	BA.4	Spain	EPI_ISL_17275884	2023-03-10
BG	BA.2	Nepal	EPI_ISL_17591967	2023-03-12
MT	BA.2	India	EPI_ISL_17372222	2023-03-12
MT	BA.2	USA	EPI_ISL_18289393	2023-03-14
BG	BA.2	Spain	EPI_ISL_17614136	2023-03-16
BG	BA.2	Venezuela	EPI_ISL_18059726	2023-03-16
BG	BA.2.75	Italy	EPI_ISL_17285430	2023-03-18
BG	BA.2.75	Belgium	EPI_ISL_17276506	2023-03-20
BG	BA.2	France	EPI_ISL_17471619	2023-03-20
MT	BA.2	France	EPI_ISL_17524503	2023-03-20
MT	BA.2	Saudi_Arabia	EPI_ISL_18405758	2023-03-20
MT	BA.2	Ireland	EPI_ISL_17383533	2023-03-21
MT	BA.2	USA	EPI_ISL_17603820	2023-03-21
BG	BA.2	Nepal	EPI_ISL_17591984	2023-03-22
MT	BA.2	South_Korea	EPI_ISL_17474243	2023-03-22
BG	BA.2.75	Germany	EPI_ISL_17433832	2023-03-24
BG	BA.2.75.3	Spain	EPI_ISL_17614169	2023-03-25
BG	BA.2	Australia	EPI_ISL_17409209	2023-03-28
BG	BA.2	Italy	EPI_ISL_17792172	2023-03-28
MT	BA.2	USA	EPI_ISL_17523266	2023-03-28
MT	BA.2	Saudi_Arabia	EPI_ISL_18405783	2023-03-28
BG	BA.2.1	India	EPI_ISL_17446132	2023-03-29
BG	BA.2	South_Korea	EPI_ISL_17511420	2023-03-29
BG	BA.2	Spain	EPI_ISL_17521622	2023-03-31
BG	BA.2	India	EPI_ISL_17540695	2023-03-31
BG	BA.2	Malaysia	EPI_ISL_17655018	2023-03-31
BG	BA.2	Spain	EPI_ISL_17652513	2023-04-03
BG	BA.2	Italy	EPI_ISL_17434223	2023-04-04
BG	BA.2	Italy	EPI_ISL_17608288	2023-04-06
BG	BA.2.75	Italy	EPI_ISL_17526263	2023-04-08
MT	BA.2	India	EPI_ISL_17592056	2023-04-08
MT	BA.2	Malaysia	EPI_ISL_17722379	2023-04-10
MT	BA.2	Russia	EPI_ISL_17736259	2023-04-10
MT	BA.2	Russia	EPI_ISL_17736264	2023-04-10
BG	BA.2	Ukraine	EPI_ISL_17583263	2023-04-11
BG	BA.2	France	EPI_ISL_17626289	2023-04-14
MT	BA.2	Spain	EPI_ISL_17679253	2023-04-17
BG	BA.2	USA	EPI_ISL_17612114	2023-04-19
BG	BA.2	Japan	EPI_ISL_17552993	2023-04-20
BG	BA.2	USA	EPI_ISL_17589845	2023-04-20
MT	BA.2	India	EPI_ISL_17717659	2023-04-20
BG	BA.2	China	EPI_ISL_17618306	2023-04-22
MT	BA.2	India	EPI_ISL_17717696	2023-04-22
BG	BA.2	USA	EPI_ISL_17686073	2023-04-24
BG	BA.2.1	Spain	EPI_ISL_17630096	2023-04-25
BG	BA.2	China	EPI_ISL_17836425	2023-04-27
BG	BA.2	Indonesia	EPI_ISL_17797250	2023-05-10
BG	BA.2	Canada	EPI_ISL_17799068	2023-05-31
BG	BA.2	Norway	EPI_ISL_17837092	2023-06-08
MT	BA.2	Thailand	EPI_ISL_18064519	2023-06-16
BG	BA.2	Australia	EPI_ISL_17857950	2023-06-19
BG	BA.2	Australia	EPI_ISL_18000155	2023-06-22
BG	BA.2	Austria	EPI_ISL_17962930	2023-06-27
BG	XBB.1.5.95	USA	EPI_ISL_18046119	2023-07-01
BG	XBB.1.5	Canada	EPI_ISL_17977995	2023-07-01
BG	XBB.1.5	USA	EPI_ISL_18005343	2023-07-01
BG	XBB.1.5	Australia	EPI_ISL_18032437	2023-07-01
BG	XBB.1.5	China	EPI_ISL_18036766	2023-07-01
BG	XBB.1.5	USA	EPI_ISL_18081363	2023-07-01
BG	XBB.1.5.73	Peru	EPI_ISL_18043428	2023-07-02
BG	XBB.1.5	USA	EPI_ISL_17996259	2023-07-02
BG	XBB.1.5	Canada	EPI_ISL_18001841	2023-07-02
BG	XBB.1.5	USA	EPI_ISL_18080973	2023-07-02
BG	XBB.1.5.77	USA	EPI_ISL_17985463	2023-07-03
BG	XBB.1.5.77	USA	EPI_ISL_18022477	2023-07-03
BG	XBB.1.5.77	Costa_Rica	EPI_ISL_18071557	2023-07-03
BG	XBB.1.5.90	Japan	EPI_ISL_18033115	2023-07-03
BG	XBB.1.5.100	USA	EPI_ISL_18081051	2023-07-03
BG	XBB.1.5	Canada	EPI_ISL_17990484	2023-07-03
BG	XBB.1.5	USA	EPI_ISL_17998609	2023-07-03
BG	XBB.1.5	Japan	EPI_ISL_18000549	2023-07-03
BG	XBB.1.5	France	EPI_ISL_18049017	2023-07-03
BG	XBB.1.5	USA	EPI_ISL_18069921	2023-07-03
BG	XBB.1.5	USA	EPI_ISL_18080444	2023-07-03
BG	XBB.1.5	USA	EPI_ISL_18080960	2023-07-03
BG	XBB.1.5	Argentina	EPI_ISL_18095157	2023-07-03
BG	XBB.1.5.90	Finland	EPI_ISL_17994831	2023-07-04
BG	XBB.1.5	USA	EPI_ISL_17985419	2023-07-04
BG	XBB.1.5	USA	EPI_ISL_17985553	2023-07-04
BG	XBB.1.5	USA	EPI_ISL_18005375	2023-07-04
BG	XBB.1.5	United_Kingdom	EPI_ISL_18015713	2023-07-04
BG	XBB.1.5	Canada	EPI_ISL_18037092	2023-07-04
BG	XBB.1.5	South_Korea	EPI_ISL_18038999	2023-07-04
BG	XBB.1.5	South_Korea	EPI_ISL_18039122	2023-07-04
BG	XBB.1.5	Japan	EPI_ISL_18047752	2023-07-04
BG	XBB.1.5.72	Panama	EPI_ISL_18043471	2023-07-05
BG	XBB.1.5.75	USA	EPI_ISL_18045378	2023-07-05
BG	XBB.1.5.90	Japan	EPI_ISL_18040349	2023-07-05
BG	XBB.1.5.90	Japan	EPI_ISL_18097862	2023-07-05
BG	XBB.1.5	USA	EPI_ISL_17985432	2023-07-05
BG	XBB.1.5	Dominican_Republic	EPI_ISL_17990180	2023-07-05
BG	XBB.1.5	USA	EPI_ISL_18005377	2023-07-05
BG	XBB.1.5	Puerto_Rico	EPI_ISL_18043033	2023-07-05
BG	XBB.1.5	South_Korea	EPI_ISL_18047190	2023-07-05
BG	XBB.1.5	USA	EPI_ISL_18050256	2023-07-05
BG	XBB.1.5	United_Kingdom	EPI_ISL_18072019	2023-07-05
BG	XBB.1.5	USA	EPI_ISL_18080957	2023-07-05
BG	XBB.1.5	USA	EPI_ISL_18090432	2023-07-05
BG	XBB.1.5.77	Colombia	EPI_ISL_18071790	2023-07-06
BG	XBB.1.5.90	Japan	EPI_ISL_18006690	2023-07-06
BG	XBB.1.5.95	USA	EPI_ISL_18080704	2023-07-06
BG	XBB.1.5	Spain	EPI_ISL_17985221	2023-07-06
BG	XBB.1.5	Japan	EPI_ISL_18006694	2023-07-06
BG	XBB.1.5	Japan	EPI_ISL_18013377	2023-07-06
BG	XBB.1.5	New_Zealand	EPI_ISL_18047814	2023-07-06
BG	XBB.1.5	Japan	EPI_ISL_18048656	2023-07-06
BG	XBB.1.5	Canada	EPI_ISL_18052976	2023-07-06
BG	XBB.1.5	USA	EPI_ISL_18107854	2023-07-06
BG	XBB.1.5	Japan	EPI_ISL_18040474	2023-07-07
BG	XBB.1.5	Panama	EPI_ISL_18043475	2023-07-07
BG	XBB.1.5	Japan	EPI_ISL_18047735	2023-07-07
BG	XBB.1.5	USA	EPI_ISL_18080792	2023-07-07
BG	XBB.1.5	USA	EPI_ISL_18082014	2023-07-07
BG	XBB.1.5	Argentina	EPI_ISL_18095193	2023-07-07
BG	XBB.1.5	USA	EPI_ISL_18107869	2023-07-07
BG	XBB.1.5	Canada	EPI_ISL_18030442	2023-07-08
BG	XBB.1.5	USA	EPI_ISL_18057528	2023-07-08
BG	XBB.1.5	USA	EPI_ISL_18023043	2023-07-09
BG	XBB.1.5	Canada	EPI_ISL_18037119	2023-07-09
BG	XBB.1.5	USA	EPI_ISL_18053780	2023-07-09
BG	HA.2	USA	EPI_ISL_18053824	2023-07-10
BG	XBB.1.5.77	USA	EPI_ISL_18053862	2023-07-10
BG	XBB.1.5	Thailand	EPI_ISL_18042063	2023-07-10
BG	XBB.1.5	USA	EPI_ISL_18045344	2023-07-10
BG	XBB.1.5	Denmark	EPI_ISL_18052039	2023-07-10
BG	XBB.1.5	Portugal	EPI_ISL_18052388	2023-07-10
BG	XBB.1.5	South_Korea	EPI_ISL_18067438	2023-07-10
BG	XBB.1.5	Ecuador	EPI_ISL_18075518	2023-07-10
BG	XBB.1.5	USA	EPI_ISL_18082205	2023-07-10
BG	XBB.1.5.55	Japan	EPI_ISL_18075795	2023-07-11
BG	XBB.1.5.77	South_Korea	EPI_ISL_18067693	2023-07-11
BG	XBB.1.5.77	Colombia	EPI_ISL_18076942	2023-07-11
BG	XBB.1.5	Thailand	EPI_ISL_18042058	2023-07-11
BG	XBB.1.5	USA	EPI_ISL_18045405	2023-07-11
BG	XBB.1.5	Canada	EPI_ISL_18052972	2023-07-11
BG	XBB.1.5	Colombia	EPI_ISL_18076898	2023-07-11
BG	GN.3	Spain	EPI_ISL_18118333	2023-07-12
BG	HA.2	USA	EPI_ISL_18040158	2023-07-12
BG	XBB.1.5.77	Italy	EPI_ISL_18019245	2023-07-12
BG	XBB.1.5.90	Japan	EPI_ISL_18097793	2023-07-12
BG	XBB.1.5	Italy	EPI_ISL_18012392	2023-07-12
BG	XBB.1.5	USA	EPI_ISL_18037626	2023-07-12
BG	XBB.1.5	USA	EPI_ISL_18044667	2023-07-12
BG	XBB.1.5	USA	EPI_ISL_18069855	2023-07-12
BG	XBB.1.5	USA	EPI_ISL_18082208	2023-07-12
BG	XBB.1.5	USA	EPI_ISL_18093322	2023-07-12
BG	XBB.1.5.77	Colombia	EPI_ISL_18076943	2023-07-13
BG	XBB.1.5	USA	EPI_ISL_18022457	2023-07-13
BG	XBB.1.5	USA	EPI_ISL_18046471	2023-07-13
BG	XBB.1.5	Japan	EPI_ISL_18058398	2023-07-13
BG	XBB.1.5	Costa_Rica	EPI_ISL_18071464	2023-07-13
BG	XBB.1.5	USA	EPI_ISL_18107821	2023-07-13
MT	BA.2	Mexico	EPI_ISL_18415832	2023-07-13
BG	XBB.1.5.90	Japan	EPI_ISL_18060516	2023-07-14
BG	XBB.1.5	USA	EPI_ISL_18057594	2023-07-14
BG	XBB.1.5	USA	EPI_ISL_18057822	2023-07-14
BG	XBB.1.5	USA	EPI_ISL_18069634	2023-07-14
BG	XBB.1.5	Costa_Rica	EPI_ISL_18071468	2023-07-14
BG	XBB.1.5	Ecuador	EPI_ISL_18075516	2023-07-14
BG	HR.1	USA	EPI_ISL_18069941	2023-07-15
BG	XBB.1.5.86	Italy	EPI_ISL_18007830	2023-07-15
BG	XBB.1.5.88	China	EPI_ISL_18074352	2023-07-15
BG	XBB.1.5.100	USA	EPI_ISL_18060584	2023-07-15
BG	XBB.1.5	Italy	EPI_ISL_18007850	2023-07-15
BG	XBB.1.5	Thailand	EPI_ISL_18064531	2023-07-15
BG	XBB.1.5.77	Colombia	EPI_ISL_18071791	2023-07-16
BG	XBB.1.5	USA	EPI_ISL_18043552	2023-07-16
BG	XBB.1.5	United_Kingdom	EPI_ISL_18056744	2023-07-16
BG	XBB.1.5	USA	EPI_ISL_18060586	2023-07-16
BG	XBB.1.5	South_Korea	EPI_ISL_18067903	2023-07-16
BG	XBB.1.22	USA	EPI_ISL_18057079	2023-07-16
BG	HA.1	USA	EPI_ISL_18072484	2023-07-17
BG	XBB.1.5	USA	EPI_ISL_18037713	2023-07-17
BG	XBB.1.5	USA	EPI_ISL_18057874	2023-07-17
BG	XBB.1.5	USA	EPI_ISL_18057907	2023-07-17
BG	XBB.1.5	USA	EPI_ISL_18072469	2023-07-17
BG	XBB.1.5	France	EPI_ISL_18075973	2023-07-17
BG	XBB.1.5	Guatemala	EPI_ISL_18099387	2023-07-17
BG	XBB.1.5	USA	EPI_ISL_18111434	2023-07-17
BG	XBB.1.5	South_Korea	EPI_ISL_18116696	2023-07-17
MT	BA.2	Ukraine	EPI_ISL_18127834	2023-07-17
BG	XBB.1.5.77	USA	EPI_ISL_18114164	2023-07-18
BG	XBB.1.5.96	Australia	EPI_ISL_18048616	2023-07-18
BG	XBB.1.5	USA	EPI_ISL_18059499	2023-07-18
BG	XBB.1.5	Australia	EPI_ISL_18060418	2023-07-18
BG	XBB.1.5	USA	EPI_ISL_18072564	2023-07-18
BG	XBB.1.5	USA	EPI_ISL_18072607	2023-07-18
BG	XBB.1.5	France	EPI_ISL_18076019	2023-07-18
BG	XBB.1.5	Japan	EPI_ISL_18097387	2023-07-18
BG	XBB.1.5	USA	EPI_ISL_18111437	2023-07-18
BG	XBB.1.5	South_Korea	EPI_ISL_18116758	2023-07-18
BG	XBB.1.5	USA	EPI_ISL_18060711	2023-07-19
BG	XBB.1.5	USA	EPI_ISL_18070023	2023-07-19
BG	XBB.1.5	Japan	EPI_ISL_18111816	2023-07-19
BG	XBB.1.5.90	Japan	EPI_ISL_18101027	2023-07-20
BG	XBB.1.5	Canary_Islands	EPI_ISL_18106993	2023-07-20
BG	XBB.1.5	Canary_Islands	EPI_ISL_18106996	2023-07-20
BG	XBB.1.5	USA	EPI_ISL_18107697	2023-07-20
BG	XBB.1.5.44	Canada	EPI_ISL_18053102	2023-07-21
BG	XBB.1.5.90	Japan	EPI_ISL_18101036	2023-07-21
BG	XBB.1.5	USA	EPI_ISL_18049917	2023-07-21
BG	XBB.1.5	USA	EPI_ISL_18057966	2023-07-21
BG	XBB.1.5	Spain	EPI_ISL_18098542	2023-07-21
BG	XBB.1.44.1	China	EPI_ISL_18108871	2023-07-21
BG	XBB.1.5.90	Japan	EPI_ISL_18097643	2023-07-22
BG	XBB.1.5	USA	EPI_ISL_18072742	2023-07-22
BG	BA.2.75.6	Singapore	EPI_ISL_18056643	2023-07-23
BG	BA.2.86.1	Denmark	EPI_ISL_18097345	2023-07-24
BG	XBB.1.5.80	USA	EPI_ISL_18098988	2023-07-24
BG	XBB.1.5.106	USA	EPI_ISL_18113977	2023-07-24
BG	XBB.1.5	USA	EPI_ISL_18072350	2023-07-24
BG	XBB.1.5	Germany	EPI_ISL_18112095	2023-07-24
BG	XBB.1.16.11	USA	EPI_ISL_18099230	2023-07-24
BG	XCK	Nigeria	EPI_ISL_18110470	2023-07-24
BG	XBB.1.5.37	USA	EPI_ISL_18099105	2023-07-25
BG	XBB.1.5	Israel	EPI_ISL_18062641	2023-07-25
BG	XBB.1.5	USA	EPI_ISL_18104184	2023-07-25
BG	XBB.1.5	USA	EPI_ISL_18104246	2023-07-25
BG	XBB.1.5	USA	EPI_ISL_18113879	2023-07-25
BG	XBB.1.5	USA	EPI_ISL_18113946	2023-07-25
BG	XBB.1.5	USA	EPI_ISL_18114131	2023-07-25
BG	XBB.1.5	USA	EPI_ISL_18115451	2023-07-25
BG	BA.2	Netherlands	EPI_ISL_18098299	2023-07-26
BG	XBB.1.5.75	USA	EPI_ISL_18104310	2023-07-26
BG	XBB.1.5.94	Spain	EPI_ISL_18095946	2023-07-26
BG	XBB.1.5.95	USA	EPI_ISL_18113896	2023-07-26
BG	XBB.1.5	USA	EPI_ISL_18080225	2023-07-26
BG	XBB.1.5	USA	EPI_ISL_18104305	2023-07-26
BG	XBB.1.5	USA	EPI_ISL_18107768	2023-07-26
BG	XBB.1.5	USA	EPI_ISL_18114032	2023-07-26
BG	XBB.1.5.17	USA	EPI_ISL_18110848	2023-07-27
BG	XBB.1.5.78	Guatemala	EPI_ISL_18099428	2023-07-27
BG	XBB.1.5	USA	EPI_ISL_18107883	2023-07-27
BG	XBB.1.5	Canada	EPI_ISL_18111079	2023-07-27
BG	XBB.1.16.11	USA	EPI_ISL_18098931	2023-07-27
BG	XBB.1.5.90	Japan	EPI_ISL_18116248	2023-07-28
BG	XBB.1.5	Canada	EPI_ISL_18076232	2023-07-28
BG	XBB.1.5	USA	EPI_ISL_18099129	2023-07-28
BG	XBB.1.16.6	USA	EPI_ISL_18099274	2023-07-28
BG	XBB.1.5.40	USA	EPI_ISL_18104662	2023-07-31
BG	XBB.1.5.101	Canada	EPI_ISL_18114545	2023-07-31
BG	XBB.1.5	USA	EPI_ISL_18095555	2023-07-31
BG	XBB.1.5	Denmark	EPI_ISL_18097327	2023-07-31
BG	XBB.1.5	USA	EPI_ISL_18114291	2023-07-31
BG	XCL	Israel	EPI_ISL_18096752	2023-08-01
[truncated: 400 more rows]

## Sheet: Supplementary Table 7
D4.1
[truncated: 101 more rows]

## Sheet: Supplementary Table 8
Assemblies displaying conflict during Pango reassignation
[truncated: 111 more rows]
