# Supplementary material for: Early evolution of BA.2.86 sheds light on the origins of highly divergent SARS-CoV-2 lineages
Source: bioRxiv preprint, doi:10.1101/2024.07.18.604213, version 2 (2024-12-25)
Supplement: Supplementary Data 5 [file 604213_file07.xlsx]

## Sheet: D3_Pango_MutCount_CLEAN
Name_1	Name_2	Type	Accession_ID	Country	Collection_Date	Lineage_Sim	PLineage_GISAID	PLineage_Reassignation	Conflict	Ambiguous_Content	LDM_counts	Mut_counts	Norm_mut_counts	Norm_LDM_counts
hCoV-19/India/MH_BJCOG_INSACOG_3954/2022	MT|BA.2|EPI_ISL_14396972|2022-07-27|India	MT	EPI_ISL_14396972	India	2022-07-27	BA.2	BA.2	BA.2	NA	0.33	4	44	65.6716	5.97015
hCoV-19/Netherlands/NH-AUMC-032982/2022	MT|BA.2|EPI_ISL_14807145|2022-08-24|Netherlands	MT	EPI_ISL_14807145	Netherlands	2022-08-24	BA.2	BA.2	BA.2	NA	0.32	4	68	100	5.88235
hCoV-19/France/un-IHU-095117/2022	MT|BA.2|EPI_ISL_17757197|2022-09|France	MT	EPI_ISL_17757197	France	2022-09	BA.2	BA.2	BA.2	NA	0.32	1	46	67.6471	1.47059
hCoV-19/India/MH_BJCOG_INSACOG_4002/2022	MT|BA.2|EPI_ISL_14396983|2022-07-24|India	MT	EPI_ISL_14396983	India	2022-07-24	BA.2	BA.2	BA.2	NA	0.31	4	53	76.8116	5.7971
hCoV-19/India/HR-PGIRohtak-BTMM3-6/2022	MT|BA.2|EPI_ISL_18373268|2022-07-07|India	MT	EPI_ISL_18373268	India	2022-07-07	BA.2.86*	BA.2	BA.2	NA	0.31	1	49	71.0145	1.44928
hCoV-19/India/HR-PGIRohtak-BTMM4-4/2022	MT|BA.2|EPI_ISL_18436123|2022-06-22|India	MT	EPI_ISL_18436123	India	2022-06-22	BA.2.86*	BA.2	BA.2	NA	0.31	1	51	73.913	1.44928
hCoV-19/India/MH-INSACOG-CSIR-NEERI2313/2022	MT|BA.2|EPI_ISL_14550867|2022-07-19|India	MT	EPI_ISL_14550867	India	2022-07-19	BA.2	BA.2	BA.2	0.5	0.3	4	36	51.4286	5.71429
hCoV-19/USA/MO-USAFSAM-S18962/2022	MT|BA.2|EPI_ISL_14576837|2022-07-25|USA	MT	EPI_ISL_14576837	USA	2022-07-25	BA.2	BA.2	BA.2	0	0.3	4	51	72.8571	5.71429
hCoV-19/India/MH-INSACOG-CSIR-NEERI2640/2022	MT|BA.2|EPI_ISL_14910709|2022-07-30|India	MT	EPI_ISL_14910709	India	2022-07-30	BA.2	BA.2	BA.2	0.5	0.3	4	38	54.2857	5.71429
hCoV-19/India/MH-INSACOG-CSIR-NEERI2650/2022	MT|BA.2|EPI_ISL_14910729|2022-08-05|India	MT	EPI_ISL_14910729	India	2022-08-05	BA.2	BA.2	BA.2	0	0.3	4	38	54.2857	5.71429
hCoV-19/Malaysia/IMR_OL788/2023	MT|BA.2|EPI_ISL_18889059|2023-12-19|Malaysia	MT	EPI_ISL_18889059	Malaysia	2023-12-19	Others	BA.2	BA.2	0	0.3	15	67	95.7143	21.4286
hCoV-19/Malaysia/IMR_OL788/2023	MT|BA.2|EPI_ISL_18889059|2023-12-19|Malaysia	MT	EPI_ISL_18889059	Malaysia	2023-12-19	BA.2	BA.2	BA.2	0	0.3	15	67	95.7143	21.4286
hCoV-19/India/MH-INSACOG-CSIR-NEERI2541/2022	MT|BA.2|EPI_ISL_14568781|2022-07-11|India	MT	EPI_ISL_14568781	India	2022-07-11	BA.2	BA.2	BA.2	0.5	0.29	3	38	53.5211	4.22535
hCoV-19/India/MH-INSACOG-CSIR-NEERI2581/2022	MT|BA.2|EPI_ISL_14568811|2022-07-21|India	MT	EPI_ISL_14568811	India	2022-07-21	BA.2	BA.2	BA.2	0	0.29	4	36	50.7042	5.6338
hCoV-19/USA/CA-HLX-STM-UJ5BSRVU2/2022	MT|BA.2|EPI_ISL_15373510|2022-09-15|USA	MT	EPI_ISL_15373510	USA	2022-09-15	BA.2	BA.2	BA.2	0	0.29	1	32	45.0704	1.40845
hCoV-19/Pakistan/NIH-B112-S11/2022	MT|BA.2|EPI_ISL_15850314|2022-11-03|Pakistan	MT	EPI_ISL_15850314	Pakistan	2022-11-03	BA.2	BA.2	BA.2	0.666667	0.29	1	41	57.7465	1.40845
hCoV-19/Hungary/118859-UPL22-005834/2022	MT|BA.2|EPI_ISL_16242849|2022-11-07|Hungary	MT	EPI_ISL_16242849	Hungary	2022-11-07	BA.2	BA.2	BA.2	0	0.29	2	44	61.9718	2.8169
hCoV-19/India/MH-HIGS-KH-27/2023	MT|BA.2|EPI_ISL_17541190|2023-03-20|India	MT	EPI_ISL_17541190	India	2023-03-20	BA.2	BA.2	BA.2	0.666667	0.29	5	52	73.2394	7.04225
hCoV-19/USA/SC-REDDI-9E45CE8D0M2/2023	MT|BA.2|EPI_ISL_17855766|2023-01-12|USA	MT	EPI_ISL_17855766	USA	2023-01-12	BA.2	BA.2	BA.2	0	0.29	2	53	74.6479	2.8169
hCoV-19/India/MH-INSACOG-RF-WT-NCL-5028/2022	MT|BA.2|EPI_ISL_18740566|2022-08-12|India	MT	EPI_ISL_18740566	India	2022-08-12	BA.2	BA.2	BA.2	0	0.29	4	44	61.9718	5.6338
hCoV-19/USA/VA-GBW-H10-018-9715/2024	MT|BA.2|EPI_ISL_18775666|2024-01-03|USA	MT	EPI_ISL_18775666	USA	2024-01-03	JN.1*	BA.2	BA.2	0	0.29	15	63	88.7324	21.1268
hCoV-19/USA/CA-HLX-STM-6QPNETJG8/2023	MT|BA.2|EPI_ISL_18785131|2023-12-20|USA	MT	EPI_ISL_18785131	USA	2023-12-20	BA.2.86*	BA.2	BA.2	0	0.29	8	35	49.2958	11.2676
hCoV-19/Malaysia/IMR_OL476/2023	FG|JN.1|EPI_ISL_18798651|2023-01-12|Malaysia	FG	EPI_ISL_18798651	Malaysia	2023-01-12	BA.2	JN.1	JN.1	0	0.29	29	90	126.761	40.8451
hCoV-19/USA/CA-HLX-STM-DNHM2PFYB/2023	MT|BA.2|EPI_ISL_18818233|2023-12-28|USA	MT	EPI_ISL_18818233	USA	2023-12-28	JN.1*	BA.2	BA.2	0	0.29	10	37	52.1127	14.0845
hCoV-19/India/OR-RMRC_B-ICMR-INSACOG-RMRC08234/2022	MT|BA.2|EPI_ISL_14814442|2022-01-24|India	MT	EPI_ISL_14814442	India	2022-01-24	BA.2	BA.2	BA.2	0	0.28	3	36	50	4.16667
hCoV-19/India/KA-SLS-51036/2022	MT|BA.2|EPI_ISL_16392130|2022-12-20|India	MT	EPI_ISL_16392130	India	2022-12-20	BA.2	BA.2	BA.2	0	0.28	1	39	54.1667	1.38889
hCoV-19/USA/AZ-ASU98214/2023	MT|BA.2|EPI_ISL_16825422|2023-01-23|USA	MT	EPI_ISL_16825422	USA	2023-01-23	BA.2	BA.2	BA.2	0	0.28	2	57	79.1667	2.77778
hCoV-19/USA/CA-HLX-STM-K6UTPTT3X/2024	MT|BA.2|EPI_ISL_18868536|2024-01-07|USA	MT	EPI_ISL_18868536	USA	2024-01-07	BA.2	BA.2	BA.2	0.666667	0.28	14	45	62.5	19.4444
hCoV-19/USA/VA-GBW-H20-354-5815/2024	MT|BA.2|EPI_ISL_18886450|2024-01-16|USA	MT	EPI_ISL_18886450	USA	2024-01-16	BA.2	BA.2	BA.2	0	0.28	14	65	90.2778	19.4444
hCoV-19/USA/VA-GBW-H20-354-5815/2024	MT|BA.2|EPI_ISL_18886450|2024-01-16|USA	MT	EPI_ISL_18886450	USA	2024-01-16	BA.2	BA.2	BA.2	0	0.28	14	65	90.2778	19.4444
hCoV-19/France/OCC-CHU-TLS-6002886754/2022	MT|BA.2|EPI_ISL_12373044|2022-04-09|France	MT	EPI_ISL_12373044	France	2022-04-09	BA.2	BA.2	BA.2	0	0.27	1	46	63.0137	1.36986
hCoV-19/India/KA-ICMR-INSACOG-VRDL-MYS-80373/2022	MT|BA.2|EPI_ISL_14357525|2022-07-22|India	MT	EPI_ISL_14357525	India	2022-07-22	BA.2	BA.2	BA.2	0	0.27	3	36	49.3151	4.10959
hCoV-19/Spain/GA-33340569/2023	MT|BA.2|EPI_ISL_18634798|2023-11-27|Spain	MT	EPI_ISL_18634798	Spain	2023-11-27	JN.1*	BA.2	BA.2	0	0.27	14	64	87.6712	19.1781
hCoV-19/India/MH_BJCOG_INSACOG_3823/2022	MT|BA.2|EPI_ISL_14291320|2022-07-24|India	MT	EPI_ISL_14291320	India	2022-07-24	BA.2	BA.2	BA.2	0	0.26	4	41	55.4054	5.40541
hCoV-19/India/MH-INSACOG-CSIR-NEERI2626/2022	MT|BA.2|EPI_ISL_14910715|2022-08-03|India	MT	EPI_ISL_14910715	India	2022-08-03	BA.2.75	BA.2	BA.2.75	0.333333	0.26	4	42	56.7568	5.40541
hCoV-19/Malaysia/IMR_LF00240/2022	MT|BA.2|EPI_ISL_15788425|2022-11-07|Malaysia	MT	EPI_ISL_15788425	Malaysia	2022-11-07	BA.2	BA.2	BA.2	0.75	0.26	1	36	48.6486	1.35135
hCoV-19/India/KA-SLS-56041/2023	MT|BA.2|EPI_ISL_17391391|2023-03-18|India	MT	EPI_ISL_17391391	India	2023-03-18	BA.2	BA.2	BA.2	0	0.26	1	42	56.7568	1.35135
hCoV-19/India/MH-CSIR-NEERI3205/2023	MT|BA.2|EPI_ISL_17591864|2023-04-17|India	MT	EPI_ISL_17591864	India	2023-04-17	BA.2	BA.2	BA.2	0	0.26	1	22	29.7297	1.35135
hCoV-19/India/KA-RFNB-20587/2023	MT|BA.2|EPI_ISL_18737722|2023-12|India	MT	EPI_ISL_18737722	India	2023-12	BA.2	BA.2	BA.2	0	0.26	12	62	83.7838	16.2162
hCoV-19/India/MH-INSACOG-RF-WT-NCL-5024/2022	MT|BA.2|EPI_ISL_18740563|2022-08-12|India	MT	EPI_ISL_18740563	India	2022-08-12	BA.2	BA.2	BA.2	0	0.26	2	44	59.4595	2.7027
hCoV-19/USA/CA-HLX-STM-3MD4BET7D/2023	MT|BA.2|EPI_ISL_18785001|2023-12-22|USA	MT	EPI_ISL_18785001	USA	2023-12-22	BA.2	BA.2	BA.2.86.1	0	0.26	9	36	48.6486	12.1622
hCoV-19/Mauritius/79116/2023	MT|BA.2|EPI_ISL_18830206|2023-11-15|Mauritius	MT	EPI_ISL_18830206	Mauritius	2023-11-15	BA.2	BA.2	BA.2	0	0.26	10	41	55.4054	13.5135
hCoV-19/USA/VA-VCUVAS3-NQMS317794/2023	MT|BA.2|EPI_ISL_18912083|2023-12-28|USA	MT	EPI_ISL_18912083	USA	2023-12-28	BA.2	BA.2	BA.2	0	0.26	10	50	67.5676	13.5135
hCoV-19/USA/VA-VCUVAS3-NQMS317794/2023	MT|BA.2|EPI_ISL_18912083|2023-12-28|USA	MT	EPI_ISL_18912083	USA	2023-12-28	BA.2	BA.2	BA.2	0	0.26	10	50	67.5676	13.5135
hCoV-19/India/MH-INSACOG-CSIR-NEERI2407/2022	MT|BA.2|EPI_ISL_14567012|2022-07-22|India	MT	EPI_ISL_14567012	India	2022-07-22	BA.2.75	BA.2	BA.2.75	0.5	0.25	4	40	53.3333	5.33333
hCoV-19/India/OR-RMRC_B-ICMR-229003/2022	MT|BA.2|EPI_ISL_16287102|2022-09-22|India	MT	EPI_ISL_16287102	India	2022-09-22	BA.2	BA.2	BA.2	0	0.25	2	30	40	2.66667
hCoV-19/India/KA-SLS-50013/2022	MT|BA.2|EPI_ISL_16485808|2022-11-04|India	MT	EPI_ISL_16485808	India	2022-11-04	BA.2	BA.2	BA.2	0.5	0.25	1	40	53.3333	1.33333
hCoV-19/USA/VA-GBW-H20-340-6627/2024	MT|BA.2|EPI_ISL_18886452|2024-01-14|USA	MT	EPI_ISL_18886452	USA	2024-01-14	BA.2	BA.2	BA.2	0	0.25	19	71	94.6667	25.3333
hCoV-19/USA/VA-GBW-H20-340-6627/2024	MT|BA.2|EPI_ISL_18886452|2024-01-14|USA	MT	EPI_ISL_18886452	USA	2024-01-14	BA.2	BA.2	BA.2	0	0.25	19	71	94.6667	25.3333
hCoV-19/USA/VA-VCUVAS3-VWPS139331/2023	MT|BA.2|EPI_ISL_18912117|2023-12-31|USA	MT	EPI_ISL_18912117	USA	2023-12-31	BA.2	BA.2	BA.2	0	0.25	15	56	74.6667	20
hCoV-19/USA/VA-VCUVAS3-VWPS139331/2023	MT|BA.2|EPI_ISL_18912117|2023-12-31|USA	MT	EPI_ISL_18912117	USA	2023-12-31	BA.2	BA.2	BA.2	0	0.25	15	56	74.6667	20
hCoV-19/Kenya/SS9387/2022	MT|BA.2|EPI_ISL_13772968|2022-06-15|Kenya	MT	EPI_ISL_13772968	Kenya	2022-06-15	Others	BA.2	BA.4	0	0.24	1	53	69.7368	1.31579
hCoV-19/India/OR-RMRC_B-ICMR-INSACOG-BBS428463/2022	MT|BA.2|EPI_ISL_14814411|2022-08-06|India	MT	EPI_ISL_14814411	India	2022-08-06	BA.2	BA.2	BA.2	0	0.24	2	35	46.0526	2.63158
hCoV-19/India/OR-RMRC_B-ICMR-INSACOG-RMRC08547/2022	MT|BA.2|EPI_ISL_14814443|2022-02-02|India	MT	EPI_ISL_14814443	India	2022-02-02	BA.2	BA.2	BA.2	0	0.24	4	36	47.3684	5.26316
hCoV-19/India/MH-INSACOG-CSIR-NEERI2645/2022	MT|BA.2|EPI_ISL_14910711|2022-08-04|India	MT	EPI_ISL_14910711	India	2022-08-04	BA.2	BA.2	BA.2	0	0.24	4	41	53.9474	5.26316
hCoV-19/India/DL-MAMC-LNHD1507/2022	MT|BA.2|EPI_ISL_15579432|2022-10-21|India	MT	EPI_ISL_15579432	India	2022-10-21	BA.2	BA.2	BA.2	0.666667	0.24	2	18	23.6842	2.63158
hCoV-19/Italy/UMB-LAOP-148-3-16/2024	MT|BA.2|EPI_ISL_18755146|2024-01-04|Italy	MT	EPI_ISL_18755146	Italy	2024-01-04	Others	BA.2	JN.1.1	0	0.24	16	75	98.6842	21.0526
hCoV-19/USA/IL-C24WGS218/2024	MT|BA.2|EPI_ISL_18872600|2024-01-19|USA	MT	EPI_ISL_18872600	USA	2024-01-19	BA.2	BA.2	BA.2	0.666667	0.24	8	51	67.1053	10.5263
hCoV-19/France/BFC-HMN-22042260115/2022	MT|BA.2|EPI_ISL_13329381|2022-04-19|France	MT	EPI_ISL_13329381	France	2022-04-19	BA.2	BA.2	BA.2	0.5	0.23	1	45	58.4416	1.2987
hCoV-19/India/TG-CDFD-GH-366/2022	MT|BA.2|EPI_ISL_14215487|2022-07-19|India	MT	EPI_ISL_14215487	India	2022-07-19	BA.2	BA.2	BA.2	0	0.23	3	46	59.7403	3.8961
hCoV-19/India/KA-ICMR-INSACOG-VRDL-MYS-76277/2022	MT|BA.2|EPI_ISL_14357480|2022-07-16|India	MT	EPI_ISL_14357480	India	2022-07-16	BA.2	BA.2	BA.2	0	0.23	1	43	55.8442	1.2987
hCoV-19/India/PB-VRDLGMCPTA-ICMR-INSACOG-GS0000242/2022	MT|BA.2|EPI_ISL_14410188|2022-06-29|India	MT	EPI_ISL_14410188	India	2022-06-29	BA.2	BA.2	BA.2	0	0.23	3	28	36.3636	3.8961
hCoV-19/India/MH-INSACOG-CSIR-NEERI2389/2022	MT|BA.2|EPI_ISL_14550910|2022-07-19|India	MT	EPI_ISL_14550910	India	2022-07-19	BA.2	BA.2	BA.2	0	0.23	4	42	54.5455	5.19481
hCoV-19/India/MH-INSACOG-CSIR-NEERI2685/2022	MT|BA.2|EPI_ISL_14910686|2022-08-22|India	MT	EPI_ISL_14910686	India	2022-08-22	BA.2	BA.2	BA.2	0	0.23	2	31	40.2597	2.5974
hCoV-19/Kuwait/B3-S55/2022	MT|BA.2|EPI_ISL_16436872|2022-10-19|Kuwait	MT	EPI_ISL_16436872	Kuwait	2022-10-19	BA.2.75	BA.2	BA.2.75	0.6	0.23	3	32	41.5584	3.8961
hCoV-19/Mozambique/INS-PCS0037791/2023	MT|BA.2|EPI_ISL_18901538|2023-10-18|Mozambique	MT	EPI_ISL_18901538	Mozambique	2023-10-18	Others	BA.2	BA.2	0	0.23	12	44	57.1429	15.5844
hCoV-19/Mozambique/INS-PCS0037791/2023	MT|BA.2|EPI_ISL_18901538|2023-10-18|Mozambique	MT	EPI_ISL_18901538	Mozambique	2023-10-18	BA.2	BA.2	BA.2	0	0.23	12	44	57.1429	15.5844
hCoV-19/India/MH-INSACOG-CSIR-NEERI2587/2022	MT|BA.2|EPI_ISL_14568805|2022-07-22|India	MT	EPI_ISL_14568805	India	2022-07-22	BA.2	BA.2	BA.2	0	0.22	4	38	48.7179	5.12821
hCoV-19/India/OR-RMRC_B-ICMR-INSACOG-RMRC07951/2022	MT|BA.2|EPI_ISL_14814437|2022-01-18|India	MT	EPI_ISL_14814437	India	2022-01-18	BA.2	BA.2	BA.2	0	0.22	3	34	43.5897	3.84615
hCoV-19/India/OR-RMRC_B-ICMR-INSACOG-RMRC10836/2022	MT|BA.2|EPI_ISL_15231529|2022-09-03|India	MT	EPI_ISL_15231529	India	2022-09-03	BA.2	BA.2	BA.2	0.75	0.22	1	37	47.4359	1.28205
hCoV-19/India/MH-ICMR-NIV-INSACOG-NIVCOV2224521/2022	MT|BA.2|EPI_ISL_15854905|2022-10-15|India	MT	EPI_ISL_15854905	India	2022-10-15	BA.2	BA.2	BA.2	0	0.22	2	29	37.1795	2.5641
hCoV-19/India/KA-SLS-56004/2023	MT|BA.2|EPI_ISL_17391357|2023-02-27|India	MT	EPI_ISL_17391357	India	2023-02-27	BA.2	BA.2	BA.2	0.2	0.22	1	37	47.4359	1.28205
hCoV-19/India/KA-SLS-56013/2023	MT|BA.2|EPI_ISL_17391366|2023-02-28|India	MT	EPI_ISL_17391366	India	2023-02-28	BA.2	BA.2	BA.2	0	0.22	2	47	60.2564	2.5641
hCoV-19/Philippines/PH-SPMC-4-251/2023	MT|BA.2|EPI_ISL_18838690|2023-12-29|Philippines	MT	EPI_ISL_18838690	Philippines	2023-12-29	BA.2	BA.2	JN.1.1	0	0.22	12	66	84.6154	15.3846
hCoV-19/India/TN-INSACOG-CSIR-NEERI2110/2022	MT|BA.2|EPI_ISL_13446547|2022-06-13|India	MT	EPI_ISL_13446547	India	2022-06-13	BA.2	BA.2	BA.2	0.75	0.21	1	35	44.3038	1.26582
hCoV-19/South Africa/CERI-KRISP-K042818/2022	MT|BA.2|EPI_ISL_13835308|2022-05-20|South_Africa	MT	EPI_ISL_13835308	South_Africa	2022-05-20	BA.2	BA.2	BA.2	0	0.21	1	42	53.1646	1.26582
hCoV-19/India/MH-INSACOG-CSIR-NEERI2268/2022	MT|BA.2|EPI_ISL_14099267|2022-06-30|India	MT	EPI_ISL_14099267	India	2022-06-30	BA.2	BA.2	BA.2	0	0.21	4	38	48.1013	5.06329
hCoV-19/India/MH-INSACOG-CSIR-NEERI2499/2022	MT|BA.2|EPI_ISL_14568787|2022-07-10|India	MT	EPI_ISL_14568787	India	2022-07-10	BA.2	BA.2	BA.2	0	0.21	4	36	45.5696	5.06329
hCoV-19/India/OR-RMRC_B-ICMR-INSACOG-RMRC07998/2022	MT|BA.2|EPI_ISL_14814439|2022-01-20|India	MT	EPI_ISL_14814439	India	2022-01-20	BA.2.75	BA.2	BA.2.75	0.666667	0.21	4	39	49.3671	5.06329
hCoV-19/India/MH_BJCOG_INSACOG_Run73_4410/2022	MT|BA.2|EPI_ISL_14910809|2022-08-19|India	MT	EPI_ISL_14910809	India	2022-08-19	BA.2	BA.2	BA.2	0	0.21	3	44	55.6962	3.79747
hCoV-19/France/PAC-ChTo-T224931174/2022	MT|BA.2|EPI_ISL_16283931|2022-12-07|France	MT	EPI_ISL_16283931	France	2022-12-07	BA.2	BA.2	BA.2	0	0.21	3	45	56.962	3.79747
hCoV-19/Italy/UMB-LAOP-148-3-15/2024	MT|BA.2|EPI_ISL_18755145|2024-01-04|Italy	MT	EPI_ISL_18755145	Italy	2024-01-04	BA.2	BA.2	XDD.1	0	0.21	15	74	93.6709	18.9873
hCoV-19/Spain/IB-HUSE-09185/2024	MT|BA.2|EPI_ISL_18846394|2024-01-02|Spain	MT	EPI_ISL_18846394	Spain	2024-01-02	BA.2	BA.2	BA.2	0	0.21	10	63	79.7468	12.6582
hCoV-19/USA/OH-ODH-SC2024030202/2024	MT|BA.2|EPI_ISL_18852240|2024-01-05|USA	MT	EPI_ISL_18852240	USA	2024-01-05	JN.1*	BA.2	BA.2	0	0.21	12	62	78.481	15.1899
hCoV-19/India/MH-INSACOG-CSIR-NEERI2428/2022	MT|BA.2|EPI_ISL_14567040|2022-07-22|India	MT	EPI_ISL_14567040	India	2022-07-22	BA.2	BA.2	BA.2	0	0.2	4	42	52.5	5
hCoV-19/India/MH-INSACOG-CSIR-NEERI2667/2022	MT|BA.2|EPI_ISL_14910699|2022-08-18|India	MT	EPI_ISL_14910699	India	2022-08-18	BA.2	BA.2	BA.2	0	0.2	4	42	52.5	5
hCoV-19/India/MH-INSACOG-CSIR-NEERI2623/2022	MT|BA.2|EPI_ISL_14910732|2022-08-03|India	MT	EPI_ISL_14910732	India	2022-08-03	BA.2.75	BA.2	BA.2.75	0.5	0.2	4	42	52.5	5
hCoV-19/India/KA-16635/2022	MT|BA.2|EPI_ISL_15294526|2022-07-15|India	MT	EPI_ISL_15294526	India	2022-07-15	BA.2	BA.2	BA.2	0	0.2	1	39	48.75	1.25
hCoV-19/India/OR-ILSGS19815/2022	MT|BA.2|EPI_ISL_15622757|2022-09-22|India	MT	EPI_ISL_15622757	India	2022-09-22	BA.2	BA.2	BA.2	0	0.2	1	38	47.5	1.25
hCoV-19/India/OR-ILSGS19919/2022	MT|BA.2|EPI_ISL_15622770|2022-08-05|India	MT	EPI_ISL_15622770	India	2022-08-05	BA.2	BA.2	BA.2	0	0.2	4	62	77.5	5
hCoV-19/India/MP-AIIMS_B-ICMR-1776/2022	MT|BA.2|EPI_ISL_15961802|2022-09-01|India	MT	EPI_ISL_15961802	India	2022-09-01	BA.2	BA.2	BA.2	0	0.2	2	47	58.75	2.5
hCoV-19/Malaysia/HPUPM_NGS0637/2022	MT|BA.2|EPI_ISL_16046989|2022-11-01|Malaysia	MT	EPI_ISL_16046989	Malaysia	2022-11-01	BA.2	BA.2	BA.2	0	0.2	3	54	67.5	3.75
hCoV-19/India/OR-RMRC_B-ICMR-INSACOG-228867/2022	MT|BA.2|EPI_ISL_16280770|2022-09-07|India	MT	EPI_ISL_16280770	India	2022-09-07	BA.2	BA.2	BA.2	0	0.2	4	41	51.25	5
hCoV-19/Oman/52231275/2022	MT|BA.2|EPI_ISL_16680418|2022-12-24|Oman	MT	EPI_ISL_16680418	Oman	2022-12-24	BA.2	BA.2	BA.2	0	0.2	2	50	62.5	2.5
hCoV-19/Lithuania/MB0306_0030/2023	MT|BA.2|EPI_ISL_17248031|2023-03-03|Lithuania	MT	EPI_ISL_17248031	Lithuania	2023-03-03	BA.2	BA.2	BA.2	0	0.2	1	50	62.5	1.25
hCoV-19/India/AS-DIB-369465/2022	MT|BA.2|EPI_ISL_18754592|2022-09-13|India	MT	EPI_ISL_18754592	India	2022-09-13	Others	BA.2	BA.2	0	0.2	3	56	70	3.75
hCoV-19/USA/CA-HLX-STM-BY42WFHUN/2024	MT|BA.2|EPI_ISL_18834852|2024-01-05|USA	MT	EPI_ISL_18834852	USA	2024-01-05	Others	BA.2	BA.2	0.5	0.2	13	48	60	16.25
hCoV-19/USA/OH-ODH-SC4030481/2024	MT|BA.2|EPI_ISL_18887088|2024-01-26|USA	MT	EPI_ISL_18887088	USA	2024-01-26	BA.2	BA.2	BA.2	0	0.2	13	64	80	16.25
hCoV-19/USA/OH-ODH-SC4030481/2024	MT|BA.2|EPI_ISL_18887088|2024-01-26|USA	MT	EPI_ISL_18887088	USA	2024-01-26	BA.2	BA.2	BA.2	0	0.2	13	64	80	16.25
hCoV-19/South Africa/CERI-KRISP-K042786/2022	MT|BA.2|EPI_ISL_13835279|2022-05-19|South_Africa	MT	EPI_ISL_13835279	South_Africa	2022-05-19	BA.2	BA.2	BA.2	0	0.19	1	39	48.1481	1.23457
hCoV-19/South Africa/CERI-KRISP-K042819/2022	MT|BA.2|EPI_ISL_13835309|2022-05-21|South_Africa	MT	EPI_ISL_13835309	South_Africa	2022-05-21	BA.2	BA.2	BA.2	0	0.19	1	40	49.3827	1.23457
hCoV-19/India/MH-INSACOG-CSIR-NEERI2440/2022	MT|BA.2|EPI_ISL_14567008|2022-07-23|India	MT	EPI_ISL_14567008	India	2022-07-23	BA.2	BA.2	BA.2	0	0.19	4	42	51.8519	4.93827
hCoV-19/India/RJ-SMS-ICMR-INSACOG-TS-16115/2022	MT|BA.2|EPI_ISL_14585654|2022-07-28|India	MT	EPI_ISL_14585654	India	2022-07-28	BA.2.75	BA.2	BA.2.75	0.333333	0.19	3	43	53.0864	3.7037
hCoV-19/India/MH-INSACOG-CSIR-NEERI2706/2022	MT|BA.2|EPI_ISL_15350790|2022-09-12|India	MT	EPI_ISL_15350790	India	2022-09-12	BA.2	BA.2	BA.2	0	0.19	4	42	51.8519	4.93827
hCoV-19/USA/SC-D8C313D28IP/2022	MT|BA.2|EPI_ISL_17141235|2022-06-15|USA	MT	EPI_ISL_17141235	USA	2022-06-15	BA.2	BA.2	BA.2	0	0.19	0	43	53.0864	0
hCoV-19/Spain/IB-HUSE-09172/2023	MT|BA.2|EPI_ISL_18846421|2023-12-29|Spain	MT	EPI_ISL_18846421	Spain	2023-12-29	BA.2	BA.2	BA.2	0	0.19	13	76	93.8272	16.0494
hCoV-19/India/GJ-INSACOG-GBRC7861/2022	MT|BA.2|EPI_ISL_13989978|2022-06-30|India	MT	EPI_ISL_13989978	India	2022-06-30	BA.2	BA.2	BA.2	0	0.18	1	47	57.3171	1.21951
hCoV-19/India/MH-INSACOG-CSIR-NEERI2451/2022	MT|BA.2|EPI_ISL_14567080|2022-07-18|India	MT	EPI_ISL_14567080	India	2022-07-18	BA.2	BA.2	BA.2	0	0.18	4	48	58.5366	4.87805
hCoV-19/India/OR-RMRC_B-ICMR-INSACOG-RMRC07516/2022	MT|BA.2|EPI_ISL_14814434|2022-01-10|India	MT	EPI_ISL_14814434	India	2022-01-10	BA.2	BA.2	BA.2	0	0.18	2	42	51.2195	2.43902
hCoV-19/India/MH-INSACOG-CSIR-NEERI2644/2022	MT|BA.2|EPI_ISL_14910697|2022-08-04|India	MT	EPI_ISL_14910697	India	2022-08-04	BA.2	BA.2	BA.2	0	0.18	4	44	53.6585	4.87805
hCoV-19/India/KA-SLS-53012/2023	MT|BA.2|EPI_ISL_16939608|2023-01-06|India	MT	EPI_ISL_16939608	India	2023-01-06	BA.2	BA.2	BA.2	0	0.18	1	43	52.439	1.21951
hCoV-19/South Africa/NICD-R09960/2023	FG|BA.2.86|EPI_ISL_18341845|2023-08-24|South_Africa	FG	EPI_ISL_18341845	South_Africa	2023-08-24	BA.2.86*	BA.2.86	BA.2.86	0	0.18	20	71	86.5854	24.3902
hCoV-19/India/KA-RFNB-20385/2023	MT|BA.2|EPI_ISL_18704252|2023-12|India	MT	EPI_ISL_18704252	India	2023-12	JN.1*	BA.2	BA.2	0	0.18	14	70	85.3659	17.0732
hCoV-19/USA/CA-HLX-STM-WTD7JCBF7/2023	MT|BA.2|EPI_ISL_18707439|2023-12-02|USA	MT	EPI_ISL_18707439	USA	2023-12-02	BA.2	BA.2	JN.1.4	0	0.18	12	38	46.3415	14.6341
hCoV-19/India/MH_BJCOG_INSACOG_6158/2023	MT|BA.2|EPI_ISL_18725623|2023-12-24|India	MT	EPI_ISL_18725623	India	2023-12-24	BA.2	BA.2	BA.2	0	0.18	13	68	82.9268	15.8537
hCoV-19/USA/CA-HLX-STM-FMJGUZVAG/2023	MT|BA.2|EPI_ISL_18818281|2023-12-19|USA	MT	EPI_ISL_18818281	USA	2023-12-19	BA.2	BA.2	BA.2	0	0.18	5	38	46.3415	6.09756
hCoV-19/USA/VA-GBW-H20-340-0671/2024	MT|BA.2|EPI_ISL_18886390|2024-01-16|USA	MT	EPI_ISL_18886390	USA	2024-01-16	BA.2	BA.2	BA.2	0	0.18	7	58	70.7317	8.53659
hCoV-19/USA/VA-GBW-H20-340-0671/2024	MT|BA.2|EPI_ISL_18886390|2024-01-16|USA	MT	EPI_ISL_18886390	USA	2024-01-16	BA.2	BA.2	BA.2	0	0.18	7	58	70.7317	8.53659
hCoV-19/South Africa/CERI-KRISP-K042754/2022	MT|BA.2|EPI_ISL_13835253|2022-05-18|South_Africa	MT	EPI_ISL_13835253	South_Africa	2022-05-18	BA.2	BA.2	BA.2	0.5	0.17	1	46	55.4217	1.20482
hCoV-19/South Africa/CERI-KRISP-K042795/2022	MT|BA.2|EPI_ISL_13835288|2022-05-19|South_Africa	MT	EPI_ISL_13835288	South_Africa	2022-05-19	BA.2	BA.2	BA.2	0	0.17	1	42	50.6024	1.20482
hCoV-19/South Africa/CERI-KRISP-K042808/2022	MT|BA.2|EPI_ISL_13835300|2022-05-20|South_Africa	MT	EPI_ISL_13835300	South_Africa	2022-05-20	BA.2	BA.2	BA.2	0	0.17	1	44	53.012	1.20482
hCoV-19/Thailand/NIC_RYG_22527/2022	MT|BA.2|EPI_ISL_14725600|2022-08-03|Thailand	MT	EPI_ISL_14725600	Thailand	2022-08-03	BA.2	BA.2	BA.2	0.333333	0.17	2	61	73.494	2.40964
hCoV-19/India/MH-INSACOG-CSIR-NEERI2600/2022	MT|BA.2|EPI_ISL_14910670|2022-08-01|India	MT	EPI_ISL_14910670	India	2022-08-01	BA.2	BA.2	BA.2	0	0.17	4	44	53.012	4.81928
hCoV-19/India/OR-RMRC_B-ICMR-INSACOG-RMRC10885/2022	MT|BA.2|EPI_ISL_15231532|2022-09-12|India	MT	EPI_ISL_15231532	India	2022-09-12	BA.2	BA.2	BA.2	0	0.17	4	42	50.6024	4.81928
hCoV-19/USA/CA-HLX-STM-AP7WUS7WV/2023	MT|BA.2|EPI_ISL_18707087|2023-12-01|USA	MT	EPI_ISL_18707087	USA	2023-12-01	BA.2.86*	BA.2	BA.2	0.5	0.17	14	46	55.4217	16.8675
hCoV-19/India/MH_BJCOG_INSACOG_6215/2024	MT|BA.2|EPI_ISL_18725678|2024-01-01|India	MT	EPI_ISL_18725678	India	2024-01-01	BA.2	BA.2	BA.2	0	0.17	18	70	84.3373	21.6867
hCoV-19/Malaysia/IMR_OL641/2023	MT|BA.2|EPI_ISL_18798628|2023-12-15|Malaysia	MT	EPI_ISL_18798628	Malaysia	2023-12-15	BA.2	BA.2	BA.2	0	0.17	7	59	71.0843	8.43373
hCoV-19/USA/IL-C24WGS264/2024	MT|BA.2|EPI_ISL_18872646|2024-01-22|USA	MT	EPI_ISL_18872646	USA	2024-01-22	BA.2	BA.2	BA.2	0	0.17	7	52	62.6506	8.43373
hCoV-19/USA/VA-VCUVAS3-ECGM282071/2024	MT|BA.2|EPI_ISL_18912053|2024-02-02|USA	MT	EPI_ISL_18912053	USA	2024-02-02	BA.2.86*	BA.2	BA.2	0	0.17	14	60	72.2892	16.8675
hCoV-19/USA/VA-VCUVAS3-ECGM282071/2024	MT|BA.2|EPI_ISL_18912053|2024-02-02|USA	MT	EPI_ISL_18912053	USA	2024-02-02	BA.2	BA.2	BA.2	0	0.17	14	60	72.2892	16.8675
hCoV-19/India/GJ-INSACOG-GBRC7239/2022	MT|BA.2|EPI_ISL_13794597|2022-05-13|India	MT	EPI_ISL_13794597	India	2022-05-13	BA.2	BA.2	BA.2	0	0.16	0	31	36.9048	0
hCoV-19/India/OR-RMRC_B-ICMR-INSACOG-BBS428483/2022	MT|BA.2|EPI_ISL_14814412|2022-08-07|India	MT	EPI_ISL_14814412	India	2022-08-07	BA.2	BA.2	BA.2	0.5	0.16	4	40	47.619	4.7619
hCoV-19/India/MH-INSACOG-CSIR-NEERI2627/2022	MT|BA.2|EPI_ISL_14910728|2022-08-03|India	MT	EPI_ISL_14910728	India	2022-08-03	BA.2	BA.2	BA.2	0	0.16	4	41	48.8095	4.7619
hCoV-19/India/OR-RMRC_B-ICMR-INSACOG-RMRC10616/2022	MT|BA.2|EPI_ISL_14987900|2022-08-04|India	MT	EPI_ISL_14987900	India	2022-08-04	BA.2	BA.2	BA.2	0	0.16	4	44	52.381	4.7619
hCoV-19/India/KL-1329-KZD-12000/2022	MT|BA.2|EPI_ISL_15937070|2022|India	MT	EPI_ISL_15937070	India	2022	BA.2	BA.2	BA.2	0	0.16	1	29	34.5238	1.19048
hCoV-19/Colombia/ANT-LDSP4388/2022	MT|BA.2|EPI_ISL_16870757|2022-12-27|Colombia	MT	EPI_ISL_16870757	Colombia	2022-12-27	BA.2	BA.2	BA.2	0	0.16	3	57	67.8571	3.57143
hCoV-19/Cameroon/V-14820/2022	MT|BA.2|EPI_ISL_16985973|2022-05-02|Cameroon	MT	EPI_ISL_16985973	Cameroon	2022-05-02	BA.2	BA.2	BA.2	0	0.16	1	55	65.4762	1.19048
hCoV-19/France/PAC-IHU-102218/2023	MT|BA.2|EPI_ISL_17397497|2023-01-01|France	MT	EPI_ISL_17397497	France	2023-01-01	BA.2	BA.2	BA.2	0.666667	0.16	1	66	78.5714	1.19048
hCoV-19/USA/CA-CDPH-6000015152/2023	MT|BA.2|EPI_ISL_17476438|2023-02-05|USA	MT	EPI_ISL_17476438	USA	2023-02-05	BA.2	BA.2	BA.2	0	0.16	3	45	53.5714	3.57143
hCoV-19/South Africa/CERI-KRISP-K059613/2023	MT|BA.2|EPI_ISL_18553232|2023-10-10|South_Africa	MT	EPI_ISL_18553232	South_Africa	2023-10-10	JN.1*	BA.2	BA.2	0	0.16	3	39	46.4286	3.57143
hCoV-19/India/MH_BJCOG_INSACOG_6159/2023	MT|BA.2|EPI_ISL_18725624|2023-12-24|India	MT	EPI_ISL_18725624	India	2023-12-24	BA.2	BA.2	BA.2	0	0.16	13	72	85.7143	15.4762
hCoV-19/USA/AZ-ASU107062/2024	MT|BA.2|EPI_ISL_18829321|2024-01-21|USA	MT	EPI_ISL_18829321	USA	2024-01-21	BA.2	BA.2	BA.2	0	0.16	12	74	88.0952	14.2857
hCoV-19/Italy/CAM-TIGEM-IZSM-COLLI-49324/2024	MT|BA.2|EPI_ISL_18858153|2024-01-13|Italy	MT	EPI_ISL_18858153	Italy	2024-01-13	BA.2	BA.2	XDD	0	0.16	12	57	67.8571	14.2857
hCoV-19/USA/VA-VCUVAS3-BYFA924917/2023	MT|BA.2|EPI_ISL_18912042|2023-12-13|USA	MT	EPI_ISL_18912042	USA	2023-12-13	BA.2	BA.2	BA.2.86.1	0	0.16	16	61	72.619	19.0476
hCoV-19/USA/VA-VCUVAS3-BYFA924917/2023	MT|BA.2|EPI_ISL_18912042|2023-12-13|USA	MT	EPI_ISL_18912042	USA	2023-12-13	BA.2	BA.2	BA.2.86.1	0	0.16	16	61	72.619	19.0476
hCoV-19/India/MH-INSACOG-CSIR-NEERI2314/2022	MT|BA.2|EPI_ISL_14550887|2022-07-20|India	MT	EPI_ISL_14550887	India	2022-07-20	BA.2	BA.2	BA.2	0	0.15	4	42	49.4118	4.70588
hCoV-19/India/MH-INSACOG-CSIR-NEERI2439/2022	MT|BA.2|EPI_ISL_14567044|2022-07-23|India	MT	EPI_ISL_14567044	India	2022-07-23	BA.2	BA.2	BA.2	0	0.15	4	41	48.2353	4.70588
hCoV-19/India/MH-INSACOG-CSIR-NEERI2513/2022	MT|BA.2|EPI_ISL_14568836|2022-07-11|India	MT	EPI_ISL_14568836	India	2022-07-11	BA.2	BA.2	BA.2	0	0.15	4	42	49.4118	4.70588
hCoV-19/Indonesia/SU-GS-PAMKI-GSILab-1104991/2022	MT|BA.2|EPI_ISL_14569950|2022-07-31|Indonesia	MT	EPI_ISL_14569950	Indonesia	2022-07-31	BA.2	BA.2	BA.2	0	0.15	4	52	61.1765	4.70588
hCoV-19/India/MH-GMCA-ICMR-INSACOG-C632097/2022	MT|BA.2|EPI_ISL_14923289|2022-08-09|India	MT	EPI_ISL_14923289	India	2022-08-09	BA.2	BA.2	BA.2	0.5	0.15	4	45	52.9412	4.70588
hCoV-19/India/TN-INSACOG-CSIR-NEERI2737/2022	MT|BA.2|EPI_ISL_15350816|2022-09-16|India	MT	EPI_ISL_15350816	India	2022-09-16	BA.2	BA.2	BA.2	0	0.15	4	48	56.4706	4.70588
hCoV-19/India/KA-RFNB-18262/2022	MT|BA.2|EPI_ISL_15654323|2022-10|India	MT	EPI_ISL_15654323	India	2022-10	BA.2	BA.2	BA.2	0	0.15	3	59	69.4118	3.52941
hCoV-19/Cameroon/1097/2022	MT|BA.2|EPI_ISL_15763780|2022-01-06|Cameroon	MT	EPI_ISL_15763780	Cameroon	2022-01-06	BA.2	BA.2	BA.2	0	0.15	1	64	75.2941	1.17647
hCoV-19/Cabo Verde/ST-2273/2022	MT|BA.2|EPI_ISL_15904158|2022-10-18|Cabo_Verde	MT	EPI_ISL_15904158	Cabo_Verde	2022-10-18	BA.2	BA.2	BA.2	0	0.15	2	57	67.0588	2.35294
hCoV-19/Malaysia/HPUPM_NGS0934/2022	MT|BA.2|EPI_ISL_17037254|2022-12-23|Malaysia	MT	EPI_ISL_17037254	Malaysia	2022-12-23	BA.2	BA.2	BA.2	0	0.15	3	51	60	3.52941
hCoV-19/Thailand/NIC_PLK_230/2024	MT|BA.2|EPI_ISL_18841961|2024-01-06|Thailand	MT	EPI_ISL_18841961	Thailand	2024-01-06	BA.2	BA.2	BA.2	0	0.15	11	64	75.2941	12.9412
hCoV-19/USA/VA-GBW-H10-019-0417/2024	MT|BA.2|EPI_ISL_18886355|2024-01-16|USA	MT	EPI_ISL_18886355	USA	2024-01-16	BA.2	BA.2	BA.2	0	0.15	19	64	75.2941	22.3529
hCoV-19/USA/VA-GBW-H10-019-0417/2024	MT|BA.2|EPI_ISL_18886355|2024-01-16|USA	MT	EPI_ISL_18886355	USA	2024-01-16	BA.2	BA.2	BA.2	0	0.15	19	64	75.2941	22.3529
hCoV-19/USA/CA-HLX-STM-BUW493WJV/2024	MT|BA.2|EPI_ISL_18903647|2024-01-10|USA	MT	EPI_ISL_18903647	USA	2024-01-10	BA.2	BA.2	JN.1.4	0	0.15	12	48	56.4706	14.1176
hCoV-19/USA/CA-HLX-STM-BUW493WJV/2024	MT|BA.2|EPI_ISL_18903647|2024-01-10|USA	MT	EPI_ISL_18903647	USA	2024-01-10	BA.2	BA.2	JN.1.4	0	0.15	12	48	56.4706	14.1176
hCoV-19/Australia/NSW-SAVID-12324/2022	MT|BA.2|EPI_ISL_13059313|2022-05-16|Australia	MT	EPI_ISL_13059313	Australia	2022-05-16	BA.2	BA.2	BA.2	0	0.14	1	54	62.7907	1.16279
hCoV-19/Indonesia/JK-NIHRD-WGS.22.05404/2022	MT|BA.2|EPI_ISL_13501644|2022-06-17|Indonesia	MT	EPI_ISL_13501644	Indonesia	2022-06-17	BA.2	BA.2	BA.2	0	0.14	0	53	61.6279	0
hCoV-19/India/RJ-SMS-ICMR-INSACOG-TS-15258/2022	MT|BA.2|EPI_ISL_14356162|2022-07-13|India	MT	EPI_ISL_14356162	India	2022-07-13	BA.2	BA.2	BA.2	0	0.14	2	53	61.6279	2.32558
hCoV-19/India/RJ-SMS-ICMR-INSACOG-TS-15261/2022	MT|BA.2|EPI_ISL_14356165|2022-07-13|India	MT	EPI_ISL_14356165	India	2022-07-13	BA.2.75	BA.2	BA.2.75	0.5	0.14	1	53	61.6279	1.16279
hCoV-19/India/OR-RMRC_B-ICMR-INSACOG-BBS425905/2022	MT|BA.2|EPI_ISL_14357368|2022-07-14|India	MT	EPI_ISL_14357368	India	2022-07-14	BA.2	BA.2	BA.2	0.333333	0.14	4	44	51.1628	4.65116
hCoV-19/India/PB-VRDLGMCPTA-ICMR-INSACOG-GS000098/2022	MT|BA.2|EPI_ISL_14408805|2022-06-20|India	MT	EPI_ISL_14408805	India	2022-06-20	BA.2	BA.2	BA.2	0	0.14	4	37	43.0233	4.65116
hCoV-19/France/NAQ-CHU-TLS-2221612792/2022	MT|BA.2|EPI_ISL_14517885|2022-08-03|France	MT	EPI_ISL_14517885	France	2022-08-03	BA.2	BA.2	BA.2	0	0.14	1	63	73.2558	1.16279
hCoV-19/India/MH-GMCA-ICMR-INSACOG-C632558/2022	MT|BA.2|EPI_ISL_14923290|2022-08-12|India	MT	EPI_ISL_14923290	India	2022-08-12	BA.2	BA.2	BA.2	0.5	0.14	4	45	52.3256	4.65116
hCoV-19/Switzerland/ZH-UZH-IMV-3ba66606/2022	MT|BA.2|EPI_ISL_15063588|2022-09-08|Switzerland	MT	EPI_ISL_15063588	Switzerland	2022-09-08	BA.2	BA.2	BA.2	0	0.14	2	60	69.7674	2.32558
hCoV-19/India/GJ-INSACOG-GBRC9023/2022	MT|BA.2|EPI_ISL_15309351|2022-09-12|India	MT	EPI_ISL_15309351	India	2022-09-12	BA.2	BA.2	BA.2	0	0.14	1	41	47.6744	1.16279
hCoV-19/Malaysia/HPUPM_NGS0625/2022	MT|BA.2|EPI_ISL_16046979|2022-10-13|Malaysia	MT	EPI_ISL_16046979	Malaysia	2022-10-13	BA.2	BA.2	BA.2	0	0.14	3	56	65.1163	3.48837
hCoV-19/Colombia/ANT-LDSP4572/2023	MT|BA.2|EPI_ISL_17183670|2023-02-08|Colombia	MT	EPI_ISL_17183670	Colombia	2023-02-08	BA.2	BA.2	BA.2	0	0.14	1	50	58.1395	1.16279
hCoV-19/Puerto Rico/RCMI-6RKWQM1X/2022	MT|BA.2|EPI_ISL_17347921|2022-12-15|Puerto_Rico	MT	EPI_ISL_17347921	Puerto_Rico	2022-12-15	BA.2	BA.2	BA.2	0	0.14	3	70	81.3953	3.48837
hCoV-19/USA/WI-WSLH-2300825/2023	MT|BA.2|EPI_ISL_17603820|2023-03-21|USA	MT	EPI_ISL_17603820	USA	2023-03-21	BA.2	BA.2	BA.2	0	0.14	1	32	37.2093	1.16279
hCoV-19/India/KA-SLS-60010/2023	MT|BA.2|EPI_ISL_17777148|2023-05-05|India	MT	EPI_ISL_17777148	India	2023-05-05	BA.2	BA.2	BA.2	0	0.14	1	47	54.6512	1.16279
hCoV-19/Egypt/CPHL-EGY24031/2022	MT|BA.2|EPI_ISL_18138821|2022-07-27|Egypt	MT	EPI_ISL_18138821	Egypt	2022-07-27	BA.2	BA.2	BA.2	0.5	0.14	2	51	59.3023	2.32558
hCoV-19/USA/UT-UPHL-231221910987/2023	MT|BA.2|EPI_ISL_18692219|2023-12-09|USA	MT	EPI_ISL_18692219	USA	2023-12-09	BA.2	BA.2	BA.2	0	0.14	7	65	75.5814	8.13953
hCoV-19/Peru/LIM-UPCH-4054/2023	MT|BA.2|EPI_ISL_18797811|2023-12-27|Peru	MT	EPI_ISL_18797811	Peru	2023-12-27	BA.2	BA.2	BA.2	0	0.14	12	47	54.6512	13.9535
hCoV-19/USA/IL-C24WGS82/2023	MT|BA.2|EPI_ISL_18836098|2023-12-29|USA	MT	EPI_ISL_18836098	USA	2023-12-29	BA.2	BA.2	BA.2	0	0.14	11	60	69.7674	12.7907
hCoV-19/USA/CA-LACPHL-AY04805/2023	MT|BA.2|EPI_ISL_18837669|2023-12-23|USA	MT	EPI_ISL_18837669	USA	2023-12-23	BA.2	BA.2	BA.2	0	0.14	5	57	66.2791	5.81395
hCoV-19/India/PB-VRDLGMCPTA-ICMR-INSACOG-GS000144/2022	MT|BA.2|EPI_ISL_14408807|2022-06-18|India	MT	EPI_ISL_14408807	India	2022-06-18	BA.2.75	BA.2	BA.2.75	0.333333	0.13	4	45	51.7241	4.5977
hCoV-19/India/AS-DIB-369153/2022	MT|BA.2|EPI_ISL_14915253|2022-07-25|India	MT	EPI_ISL_14915253	India	2022-07-25	BA.2	BA.2	BA.2	0	0.13	1	51	58.6207	1.14943
hCoV-19/India/GJ-INSACOG-GBRC8393/2022	MT|BA.2|EPI_ISL_15057966|2022-08-11|India	MT	EPI_ISL_15057966	India	2022-08-11	BA.2	BA.2	BA.2	0.5	0.13	1	43	49.4253	1.14943
hCoV-19/India/PY-49082_S82_R1_001/2022	MT|BA.2|EPI_ISL_15857886|2022-10|India	MT	EPI_ISL_15857886	India	2022-10	BA.2	BA.2	BA.2	0	0.13	1	43	49.4253	1.14943
hCoV-19/Malaysia/HPUPM_NGS0659/2022	MT|BA.2|EPI_ISL_16047009|2022-10-14|Malaysia	MT	EPI_ISL_16047009	Malaysia	2022-10-14	BA.2	BA.2	BA.2	0	0.13	3	50	57.4713	3.44828
hCoV-19/Thailand/NIC_BKK_SJ0800/2022	MT|BA.2|EPI_ISL_16061715|2022-05-13|Thailand	MT	EPI_ISL_16061715	Thailand	2022-05-13	BA.2	BA.2	BA.2	0	0.13	3	62	71.2644	3.44828
hCoV-19/USA/CA-SCPHL-22-02531/2022	MT|BA.2|EPI_ISL_16171387|2022-12-05|USA	MT	EPI_ISL_16171387	USA	2022-12-05	BA.2	BA.2	BA.2	0	0.13	4	62	71.2644	4.5977
hCoV-19/Kuwait/B3-S9/2022	MT|BA.2|EPI_ISL_16436836|2022-09-14|Kuwait	MT	EPI_ISL_16436836	Kuwait	2022-09-14	BA.2.75	BA.2	BA.2.75	0.714286	0.13	2	40	45.977	2.29885
hCoV-19/USA/VA-VTVAS3-GSC41585/2023	MT|BA.2|EPI_ISL_16731648|2023-01-15|USA	MT	EPI_ISL_16731648	USA	2023-01-15	BA.2	BA.2	BA.2	0	0.13	3	56	64.3678	3.44828
hCoV-19/Italy/CAM-TIGEM-IZSM-COLLI-44604/2023	MT|BA.2|EPI_ISL_16926403|2023-01-24|Italy	MT	EPI_ISL_16926403	Italy	2023-01-24	BA.2	BA.2	BA.2	0	0.13	2	50	57.4713	2.29885
hCoV-19/USA/IL-C23WGS3516/2023	MT|BA.2|EPI_ISL_18647368|2023-12-04|USA	MT	EPI_ISL_18647368	USA	2023-12-04	BA.2	BA.2	BA.2	0	0.13	11	66	75.8621	12.6437
hCoV-19/USA/TX-HMH-M-136855/2023	MT|BA.2|EPI_ISL_18743190|2023-12-27|USA	MT	EPI_ISL_18743190	USA	2023-12-27	BA.2	BA.2	BA.2	0	0.13	17	72	82.7586	19.5402
hCoV-19/USA/TX-HMH-M-136443/2023	MT|BA.2|EPI_ISL_18743521|2023-12-15|USA	MT	EPI_ISL_18743521	USA	2023-12-15	BA.2	BA.2	BA.2	0	0.13	19	102	117.241	21.8391
hCoV-19/USA/TX-HMH-M-136466/2023	MT|BA.2|EPI_ISL_18743592|2023-12-16|USA	MT	EPI_ISL_18743592	USA	2023-12-16	BA.2	BA.2	BA.2	0	0.13	15	75	86.2069	17.2414
hCoV-19/USA/CA-LACPHL-AY05237/2023	MT|BA.2|EPI_ISL_18887450|2023-12-26|USA	MT	EPI_ISL_18887450	USA	2023-12-26	JN.1*	BA.2	BA.2	0	0.13	5	54	62.069	5.74713
hCoV-19/USA/CA-LACPHL-AY05237/2023	MT|BA.2|EPI_ISL_18887450|2023-12-26|USA	MT	EPI_ISL_18887450	USA	2023-12-26	BA.2	BA.2	BA.2	0	0.13	5	54	62.069	5.74713
hCoV-19/USA/TX-Curative-483986/2022	MT|BA.2|EPI_ISL_13128589|2022-05-17|USA	MT	EPI_ISL_13128589	USA	2022-05-17	BA.2	BA.2	BA.2	0	0.12	1	30	34.0909	1.13636
hCoV-19/India/MH-RFIP13697/2022	MT|BA.2|EPI_ISL_14260734|2022-07-03|India	MT	EPI_ISL_14260734	India	2022-07-03	BA.2	BA.2	BA.2	0	0.12	1	55	62.5	1.13636
hCoV-19/India/MH-RFIP13639/2022	MT|BA.2|EPI_ISL_14260788|2022-07-02|India	MT	EPI_ISL_14260788	India	2022-07-02	BA.2.75	BA.2	BA.2.75	0.333333	0.12	2	56	63.6364	2.27273
hCoV-19/India/PB-VRDLGMCPTA-ICMR-INSACOG-GS0000257/2022	MT|BA.2|EPI_ISL_14410178|2022-07-02|India	MT	EPI_ISL_14410178	India	2022-07-02	BA.2	BA.2	BA.2	0	0.12	1	36	40.9091	1.13636
hCoV-19/India/MH-INSACOG-CSIR-NEERI2461/2022	MT|BA.2|EPI_ISL_14567067|2022-07-23|India	MT	EPI_ISL_14567067	India	2022-07-23	BA.2	BA.2	BA.2	0	0.12	4	43	48.8636	4.54545
hCoV-19/India/MH-INSACOG-CSIR-NEERI2539/2022	MT|BA.2|EPI_ISL_14568837|2022-07-12|India	MT	EPI_ISL_14568837	India	2022-07-12	BA.2	BA.2	BA.2	0	0.12	4	41	46.5909	4.54545
hCoV-19/India/OR-RMRC_B-ICMR-INSACOG-BBS430266/2022	MT|BA.2|EPI_ISL_14987890|2022-09-05|India	MT	EPI_ISL_14987890	India	2022-09-05	BA.2.75	BA.2	BA.2.75	0.5	0.12	4	50	56.8182	4.54545
hCoV-19/France/IDF-APHPSU_PSL-662208007703/2022	MT|BA.2|EPI_ISL_15509755|2022-08-01|France	MT	EPI_ISL_15509755	France	2022-08-01	BA.2	BA.2	BA.2	0	0.12	3	68	77.2727	3.40909
hCoV-19/India/PY-49083_S83_R1_001/2022	MT|BA.2|EPI_ISL_15857885|2022-10|India	MT	EPI_ISL_15857885	India	2022-10	BA.2	BA.2	BA.2	0	0.12	1	44	50	1.13636
hCoV-19/Malaysia/HPUPM_NGS0633/2022	MT|BA.2|EPI_ISL_16046985|2022-10-27|Malaysia	MT	EPI_ISL_16046985	Malaysia	2022-10-27	BA.2	BA.2	BA.2	0	0.12	3	55	62.5	3.40909
hCoV-19/Malaysia/HPUPM_NGS0655/2022	MT|BA.2|EPI_ISL_16047006|2022-10-10|Malaysia	MT	EPI_ISL_16047006	Malaysia	2022-10-10	BA.2	BA.2	BA.2	0	0.12	5	61	69.3182	5.68182
hCoV-19/Zimbabwe/77820/2022	MT|BA.2|EPI_ISL_16724327|2022-09-07|Zimbabwe	MT	EPI_ISL_16724327	Zimbabwe	2022-09-07	BA.2	BA.2	BA.2	0	0.12	5	49	55.6818	5.68182
hCoV-19/USA/NJ-PHEL-V23004984/2023	MT|BA.2|EPI_ISL_16944924|2023-02-05|USA	MT	EPI_ISL_16944924	USA	2023-02-05	BA.2	BA.2	BA.2	0.5	0.12	3	54	61.3636	3.40909
hCoV-19/Colombia/ANT-LDSP4580/2023	MT|BA.2|EPI_ISL_17183678|2023-02-09|Colombia	MT	EPI_ISL_17183678	Colombia	2023-02-09	BA.2	BA.2	BA.2	0	0.12	2	53	60.2273	2.27273
hCoV-19/Kuwait/Jaber-20528886/2023	MT|BA.2|EPI_ISL_18048687|2023-01-05|Kuwait	MT	EPI_ISL_18048687	Kuwait	2023-01-05	XBB.1.5	BA.2	BN.1	0	0.12	3	52	59.0909	3.40909
hCoV-19/Spain/GA-SCQ_23-916363/2023	MT|BA.2|EPI_ISL_18400467|2023-09-15|Spain	MT	EPI_ISL_18400467	Spain	2023-09-15	BA.2	BA.2	BA.2	0	0.12	16	74	84.0909	18.1818
hCoV-19/Poland/Kce-1467/2023	MT|BA.2|EPI_ISL_18705543|2023-12-15|Poland	MT	EPI_ISL_18705543	Poland	2023-12-15	BA.2.86*	BA.2	BA.2	0	0.12	12	74	84.0909	13.6364
hCoV-19/India/MH_BJCOG_INSACOG_6216/2024	MT|BA.2|EPI_ISL_18726328|2024-01-01|India	MT	EPI_ISL_18726328	India	2024-01-01	BA.2	BA.2	BA.2	0	0.12	14	75	85.2273	15.9091
hCoV-19/USA/CA-LACPHL-AY04952/2024	MT|BA.2|EPI_ISL_18870275|2024-01-01|USA	MT	EPI_ISL_18870275	USA	2024-01-01	BA.2	BA.2	BA.2	0	0.12	5	55	62.5	5.68182
hCoV-19/Cabo Verde/SV0308/2023	FG|JN.1|EPI_ISL_18873737|2023-08-16|Cabo_Verde	FG	EPI_ISL_18873737	Cabo_Verde	2023-08-16	JN.1*	JN.1	JN.1	0	0.12	29	91	103.409	32.9545
hCoV-19/USA/CA-LACPHL-AY05169/2024	FG|JN.1|EPI_ISL_18887404|2022-02-15|USA	FG	EPI_ISL_18887404	USA	2024-01-05	JN.1*	JN.1.43	JN.1	0	0.12	29	94	106.818	32.9545
hCoV-19/USA/CA-LACPHL-AY05169/2024	FG|JN.1|EPI_ISL_18887404|2022-02-15|USA	FG	EPI_ISL_18887404	USA	2024-01-05	JN.1	JN.1.43	JN.1	0	0.12	29	94	106.818	32.9545
hCoV-19/Mozambique/INS-PCS0040039/2023	MT|BA.2|EPI_ISL_18901575|2023-12-19|Mozambique	MT	EPI_ISL_18901575	Mozambique	2023-12-19	BA.2	BA.2	BA.2	0	0.12	7	49	55.6818	7.95455
hCoV-19/Mozambique/INS-PCS0040039/2023	MT|BA.2|EPI_ISL_18901575|2023-12-19|Mozambique	MT	EPI_ISL_18901575	Mozambique	2023-12-19	BA.2	BA.2	BA.2	0	0.12	7	49	55.6818	7.95455
hCoV-19/France/OCC-CHU-TLS-6002857345/2022	MT|BA.2|EPI_ISL_11997978|2022-03-29|France	MT	EPI_ISL_11997978	France	2022-03-29	BA.2	BA.2	BA.2	0	0.11	1	58	65.1685	1.1236
hCoV-19/Australia/NSW-RPAH-3001/2022	MT|BA.2|EPI_ISL_12701701|2022-04-30|Australia	MT	EPI_ISL_12701701	Australia	2022-04-30	BA.2	BA.2	BA.2	0	0.11	1	54	60.6742	1.1236
hCoV-19/India/TN-CDFD-J-182/2022	MT|BA.2|EPI_ISL_13342221|2022-06-06|India	MT	EPI_ISL_13342221	India	2022-06-06	BA.2	BA.2	BA.2	0.333333	0.11	1	48	53.9326	1.1236
hCoV-19/England/PHEP-YYFBAP8/2022	MT|BA.2|EPI_ISL_13475784|2022-06-05|England	MT	EPI_ISL_13475784	England	2022-06-05	BA.2	BA.2	BA.2	0	0.11	1	61	68.5393	1.1236
hCoV-19/Colombia/BOL-UNIMOL-VG-821/2022	MT|BA.2|EPI_ISL_13860543|2022-06-14|Colombia	MT	EPI_ISL_13860543	Colombia	2022-06-14	BA.2	BA.2	BA.2	0	0.11	0	50	56.1798	0
hCoV-19/India/MH-RFIP13955/2022	MT|BA.2|EPI_ISL_14487688|2022-06-30|India	MT	EPI_ISL_14487688	India	2022-06-30	BA.2	BA.2	BA.2	0	0.11	1	56	62.9213	1.1236
hCoV-19/Nepal/NPHL-S-1864/2022	MT|BA.2|EPI_ISL_15313060|2022-09-05|Nepal	MT	EPI_ISL_15313060	Nepal	2022-09-05	BA.2	BA.2	BA.2	0	0.11	1	28	31.4607	1.1236
hCoV-19/India/MH-ICMR-NIV-INSACOG-GSEQ-12720/2022	MT|BA.2|EPI_ISL_15854941|2022-10-14|India	MT	EPI_ISL_15854941	India	2022-10-14	BA.2	BA.2	BA.2	0	0.11	3	44	49.4382	3.37079
hCoV-19/Malaysia/HPUPM_NGS0647/2022	MT|BA.2|EPI_ISL_16046998|2022-09-10|Malaysia	MT	EPI_ISL_16046998	Malaysia	2022-09-10	BA.2	BA.2	BA.2	0	0.11	3	52	58.427	3.37079
hCoV-19/Thailand/NIC_BKK_SJ0798/2022	MT|BA.2|EPI_ISL_16061713|2022-05-13|Thailand	MT	EPI_ISL_16061713	Thailand	2022-05-13	BA.2	BA.2	BA.2	0	0.11	1	60	67.4157	1.1236
hCoV-19/India/KA-SLS-SEQ-55022/2023	MT|BA.2|EPI_ISL_17229378|2023-02-24|India	MT	EPI_ISL_17229378	India	2023-02-24	Others	BA.2	BA.4	0	0.11	1	54	60.6742	1.1236
hCoV-19/USA/CA-LACPHL-AY03956/2023	MT|BA.2|EPI_ISL_18679510|2023-11-20|USA	MT	EPI_ISL_18679510	USA	2023-11-20	JN.1*	BA.2	BA.2	0	0.11	10	59	66.2921	11.236
hCoV-19/USA/IL-C23WGS3731/2023	MT|BA.2|EPI_ISL_18742719|2023-12-16|USA	MT	EPI_ISL_18742719	USA	2023-12-16	Others	BA.2	BA.2	0	0.11	17	68	76.4045	19.1011
hCoV-19/USA/TX-HMH-M-136485/2023	MT|BA.2|EPI_ISL_18743563|2023-12-17|USA	MT	EPI_ISL_18743563	USA	2023-12-17	BA.2	BA.2	BA.2	0	0.11	10	67	75.2809	11.236
hCoV-19/USA/CA-HLX-STM-R5F46YWF6/2023	MT|BA.2|EPI_ISL_18784931|2023-12-22|USA	MT	EPI_ISL_18784931	USA	2023-12-22	BA.2	BA.2	BA.2	0	0.11	14	54	60.6742	15.7303
hCoV-19/India/KA-RFNB-20966/2023	MT|BA.2|EPI_ISL_18857881|2023-12-27|India	MT	EPI_ISL_18857881	India	2023-12-27	BA.2	BA.2	BA.2	0	0.11	12	73	82.0225	13.4831
hCoV-19/France/OCC-GENBIO-X96GN1220150/2022	MT|BA.2|EPI_ISL_12587992|2022-05-02|France	MT	EPI_ISL_12587992	France	2022-05-02	BA.2	BA.2	BA.2	0	0.1	0	57	63.3333	0
hCoV-19/USA/NY-PRL-220615_00L10/2022	MT|BA.2|EPI_ISL_13478777|2022-06-13|USA	MT	EPI_ISL_13478777	USA	2022-06-13	BA.2	BA.2	BA.2	0	0.1	0	55	61.1111	0
hCoV-19/USA/IL-NM-30852/2022	MT|BA.2|EPI_ISL_13493905|2022-05-19|USA	MT	EPI_ISL_13493905	USA	2022-05-19	BA.2	BA.2	BA.2	0.6	0.1	0	57	63.3333	0
hCoV-19/India/MH-RFIP13674/2022	MT|BA.2|EPI_ISL_14260721|2022-07-03|India	MT	EPI_ISL_14260721	India	2022-07-03	BA.2	BA.2	BA.2	0	0.1	2	59	65.5556	2.22222
hCoV-19/India/MH-RFIP13736/2022	MT|BA.2|EPI_ISL_14260829|2022-07-04|India	MT	EPI_ISL_14260829	India	2022-07-04	BA.2	BA.2	BA.2	0	0.1	2	53	58.8889	2.22222
hCoV-19/India/PB-VRDLGMCPTA-ICMR-INSACOG-GS0000247/2022	MT|BA.2|EPI_ISL_14410186|2022-06-14|India	MT	EPI_ISL_14410186	India	2022-06-14	BA.2	BA.2	BA.2	0	0.1	3	38	42.2222	3.33333
hCoV-19/India/OR-RMRC_B-ICMR-INSACOG-RMRC07954/2022	MT|BA.2|EPI_ISL_14814438|2022-01-18|India	MT	EPI_ISL_14814438	India	2022-01-18	BA.2	BA.2	BA.2	0.666667	0.1	3	47	52.2222	3.33333
hCoV-19/India/MH-GMCA-ICMR-INSACOG-C633043/2022	MT|BA.2|EPI_ISL_14923216|2022-08-16|India	MT	EPI_ISL_14923216	India	2022-08-16	BA.2	BA.2	BA.2	0	0.1	4	50	55.5556	4.44444
hCoV-19/India/KA-18351/2022	MT|BA.2|EPI_ISL_15294750|2022-08-04|India	MT	EPI_ISL_15294750	India	2022-08-04	BA.2.75	BA.2	BA.2.75	0.5	0.1	3	48	53.3333	3.33333
hCoV-19/France/IDF-APHPSU_PSL-662207069247/2022	MT|BA.2|EPI_ISL_15509746|2022-07-26|France	MT	EPI_ISL_15509746	France	2022-07-26	BA.2	BA.2	BA.2	0	0.1	3	60	66.6667	3.33333
hCoV-19/India/DL-NII-1398/2022	MT|BA.2|EPI_ISL_15757269|2022-08-02|India	MT	EPI_ISL_15757269	India	2022-08-02	BA.2	BA.2	BA.2	0	0.1	4	31	34.4444	4.44444
hCoV-19/India/PY-49090_S90_R1_001/2022	MT|BA.2|EPI_ISL_15857894|2022-10|India	MT	EPI_ISL_15857894	India	2022-10	BA.2	BA.2	BA.2	0	0.1	1	46	51.1111	1.11111
hCoV-19/England/PHEC-YY8OMD8/2022	MT|BA.2|EPI_ISL_16109108|2022-11-30|England	MT	EPI_ISL_16109108	England	2022-11-30	BA.2	BA.2	BA.2	0.5	0.1	2	52	57.7778	2.22222
hCoV-19/USA/MN-MDH-32736/2022	MT|BA.2|EPI_ISL_16423219|2022-12-14|USA	MT	EPI_ISL_16423219	USA	2022-12-14	BA.2	BA.2	BA.2	0	0.1	3	55	61.1111	3.33333
hCoV-19/Germany/BY-RKI-I-1117648/2023	MT|BA.2|EPI_ISL_17177224|2023-02-14|Germany	MT	EPI_ISL_17177224	Germany	2023-02-14	BA.2	BA.2	BA.2	0	0.1	2	33	36.6667	2.22222
hCoV-19/Lithuania/MB0228_0140/2023	MT|BA.2|EPI_ISL_17247960|2023-02-23|Lithuania	MT	EPI_ISL_17247960	Lithuania	2023-02-23	BA.2	BA.2	BA.2	0	0.1	2	43	47.7778	2.22222
hCoV-19/USA/VA-VTVAS3-GSC44281/2023	MT|BA.2|EPI_ISL_18555616|2023-11-11|USA	MT	EPI_ISL_18555616	USA	2023-11-11	BA.2	BA.2	BA.2	0	0.1	12	65	72.2222	13.3333
hCoV-19/USA/VA-VCUVAS3-LYEX914457/2023	MT|BA.2|EPI_ISL_18584588|2023-10-02|USA	MT	EPI_ISL_18584588	USA	2023-10-02	JN.1*	BA.2	BA.2	0.5	0.1	16	64	71.1111	17.7778
hCoV-19/USA/IL-C23WGS3748/2023	MT|BA.2|EPI_ISL_18742722|2023-12-21|USA	MT	EPI_ISL_18742722	USA	2023-12-21	BA.2	BA.2	BA.2	0	0.1	18	67	74.4444	20
hCoV-19/USA/TX-HMH-M-136564/2023	MT|BA.2|EPI_ISL_18743477|2023-12-19|USA	MT	EPI_ISL_18743477	USA	2023-12-19	BA.2	BA.2	BA.2	0	0.1	14	99	110	15.5556
hCoV-19/USA/TX-HMH-M-136489/2023	MT|BA.2|EPI_ISL_18743567|2023-12-16|USA	MT	EPI_ISL_18743567	USA	2023-12-16	BA.2	BA.2	BA.2	0	0.1	12	77	85.5556	13.3333
hCoV-19/USA/TX-HMH-M-136605/2023	MT|BA.2|EPI_ISL_18743730|2023-12-20|USA	MT	EPI_ISL_18743730	USA	2023-12-20	BA.2	BA.2	BA.2	0	0.1	16	89	98.8889	17.7778
hCoV-19/Lithuania/MB231211_0051/2023	MT|BA.2|EPI_ISL_18793517|2023-12-04|Lithuania	MT	EPI_ISL_18793517	Lithuania	2023-12-04	BA.2	BA.2	BA.2	0	0.1	5	44	48.8889	5.55556
hCoV-19/USA/IL-C24WGS56/2023	MT|BA.2|EPI_ISL_18836072|2023-12-29|USA	MT	EPI_ISL_18836072	USA	2023-12-29	BA.2	XDP	BA.2	0	0.1	17	71	78.8889	18.8889
hCoV-19/Lithuania/MB231227_0048/2023	MT|BA.2|EPI_ISL_18897076|2023-12-20|Lithuania	MT	EPI_ISL_18897076	Lithuania	2023-12-20	BA.2	BA.2	BA.2	0	0.1	6	53	58.8889	6.66667
hCoV-19/Lithuania/MB231227_0048/2023	MT|BA.2|EPI_ISL_18897076|2023-12-20|Lithuania	MT	EPI_ISL_18897076	Lithuania	2023-12-20	BA.2	BA.2	BA.2	0	0.1	6	53	58.8889	6.66667
hCoV-19/England/NEWC-39CE4E2/2022	MT|BA.2|EPI_ISL_11031178|2022-03-08|England	MT	EPI_ISL_11031178	England	2022-03-08	BA.2	BA.2	BA.2	0	0.09	0	50	54.9451	0
hCoV-19/France/NAQ-HCL722002490701/2022	MT|BA.2|EPI_ISL_12628779|2022-04-25|France	MT	EPI_ISL_12628779	France	2022-04-25	BA.2	BA.2	BA.2	0	0.09	0	48	52.7473	0
hCoV-19/USA/CA-CDC-LC0618906/2022	MT|BA.2|EPI_ISL_12759972|2022-05-04|USA	MT	EPI_ISL_12759972	USA	2022-05-04	BA.2	BA.2	BA.2	0	0.09	1	50	54.9451	1.0989
hCoV-19/USA/NJ-CDC-LC0656560/2022	MT|BA.2|EPI_ISL_13077637|2022-05-19|USA	MT	EPI_ISL_13077637	USA	2022-05-19	BA.2	BA.2	BA.2	0	0.09	1	58	63.7363	1.0989
hCoV-19/India/MH-INSACOG-CSIR-NEERI2187/2022	MT|BA.2|EPI_ISL_13640135|2022-06-26|India	MT	EPI_ISL_13640135	India	2022-06-26	BA.2	BA.2	BA.2	0	0.09	4	43	47.2527	4.3956
hCoV-19/India/TN-CDFD-J-1099/2022	MT|BA.2|EPI_ISL_13668043|2022-06-16|India	MT	EPI_ISL_13668043	India	2022-06-16	BA.2	BA.2	BA.2	0	0.09	2	49	53.8462	2.1978
hCoV-19/India/GJ-INSACOG-GBRC7539/2022	MT|BA.2|EPI_ISL_13711370|2022-06-14|India	MT	EPI_ISL_13711370	India	2022-06-14	Others	BA.2	BA.2.76	0	0.09	0	43	47.2527	0
hCoV-19/India/MH-RFIP13727/2022	MT|BA.2|EPI_ISL_14260828|2022-07-04|India	MT	EPI_ISL_14260828	India	2022-07-04	BA.2	BA.2	BA.2	0	0.09	2	54	59.3407	2.1978
hCoV-19/Russia/MOS-CRIE-4777732698/2022	MT|BA.2|EPI_ISL_14424670|2022-04-21|Russia	MT	EPI_ISL_14424670	Russia	2022-04-21	BA.2	BA.2	BA.2	0.5	0.09	1	60	65.9341	1.0989
hCoV-19/India/HR-IGIB12101054553/2022	MT|BA.2|EPI_ISL_14952713|2022-08|India	MT	EPI_ISL_14952713	India	2022-08	BA.2	BA.2	BA.2	0	0.09	3	51	56.044	3.2967
hCoV-19/India/GJ-INSACOG-GBRC8803/2022	MT|BA.2|EPI_ISL_15073993|2022-09-06|India	MT	EPI_ISL_15073993	India	2022-09-06	BA.2	BA.2	BA.2	0	0.09	1	46	50.5495	1.0989
hCoV-19/Pakistan/NIH-B105-S22/2022	MT|BA.2|EPI_ISL_15349687|2022-08-14|Pakistan	MT	EPI_ISL_15349687	Pakistan	2022-08-14	BA.2	BA.2	BA.2	0	0.09	1	49	53.8462	1.0989
hCoV-19/Malaysia/MKAKK_WC370/2022	MT|BA.2|EPI_ISL_15671878|2022-10-19|Malaysia	MT	EPI_ISL_15671878	Malaysia	2022-10-19	BA.2	BA.2	BA.2	0	0.09	3	48	52.7473	3.2967
hCoV-19/USA/UT-UPHL-221110611494/2022	MT|BA.2|EPI_ISL_15782515|2022-10-30|USA	MT	EPI_ISL_15782515	USA	2022-10-30	BA.2	BA.2	BA.2	0	0.09	2	49	53.8462	2.1978
hCoV-19/Russia/LIP-RII-MH106106S/2022	MT|BA.2|EPI_ISL_15828616|2022-09-27|Russia	MT	EPI_ISL_15828616	Russia	2022-09-27	BA.2	BA.2	BA.2	0	0.09	4	65	71.4286	4.3956
hCoV-19/Indonesia/KI-FK_UNMUL-32244/2022	MT|BA.2|EPI_ISL_16608593|2022-12-23|Indonesia	MT	EPI_ISL_16608593	Indonesia	2022-12-23	BA.2	BA.2	BA.2	0	0.09	2	53	58.2418	2.1978
hCoV-19/Germany/SH-RKI-I-1092565/2023	MT|BA.2|EPI_ISL_16695435|2023-01-10|Germany	MT	EPI_ISL_16695435	Germany	2023-01-10	BA.2	BA.2	BA.2.56	0	0.09	1	67	73.6264	1.0989
hCoV-19/Germany/BY-RKI-I-1117646/2023	MT|BA.2|EPI_ISL_17177222|2023-02-19|Germany	MT	EPI_ISL_17177222	Germany	2023-02-19	BA.2	BA.2	BA.2	0	0.09	2	34	37.3626	2.1978
hCoV-19/Chile/RM-EP0000334/2023	BG|BA.2|EPI_ISL_17861626|2023-03-06|Chile	BG	EPI_ISL_17861626	Chile	2023-03-06	BA.2	BA.2	BA.2	0	0.09	0	44	48.3516	0
hCoV-19/Italy/LOM_Niguarda_80352177PAR/2023	MT|BA.2|EPI_ISL_18721993|2023-12-31|Italy	MT	EPI_ISL_18721993	Italy	2023-12-31	JN.1*	BA.2	BA.2	0	0.09	13	71	78.022	14.2857
hCoV-19/Peru/LIM-UPCH-4058/2024	MT|BA.2|EPI_ISL_18797815|2024-01-04|Peru	MT	EPI_ISL_18797815	Peru	2024-01-04	BA.2	BA.2	BA.2.86.1	0	0.09	19	59	64.8352	20.8791
hCoV-19/Canada/ON-KHS-00465-v1/2024	MT|BA.2|EPI_ISL_18810805|2024-01-12|Canada	MT	EPI_ISL_18810805	Canada	2024-01-12	BA.2	BA.2	BA.2	0	0.09	7	58	63.7363	7.69231
hCoV-19/USA/IL-C24WGS248/2024	MT|BA.2|EPI_ISL_18872630|2024-01-21|USA	MT	EPI_ISL_18872630	USA	2024-01-21	BA.2	BA.2	BA.2	0	0.09	20	70	76.9231	21.978
hCoV-19/India/RJ-SMS-ICMR-INSACOG-TS-10606/2022	MT|BA.2|EPI_ISL_10523055|2022-02-17|India	MT	EPI_ISL_10523055	India	2022-02-17	BA.2	BA.2	BA.2	0	0.08	1	32	34.7826	1.08696
hCoV-19/England/PHEC-YYDKGUH/2022	MT|BA.2|EPI_ISL_11314679|2022-03-07|England	MT	EPI_ISL_11314679	England	2022-03-07	BA.2	BA.2	BA.2	0.333333	0.08	1	56	60.8696	1.08696
hCoV-19/France/OCC-CHU-TLS-2208912199/2022	MT|BA.2|EPI_ISL_11997971|2022-03-29|France	MT	EPI_ISL_11997971	France	2022-03-29	BA.2	BA.2	BA.2	0	0.08	0	60	65.2174	0
hCoV-19/South Africa/CERI-KRISP-K039631/2022	MT|BA.2|EPI_ISL_11999061|2022-03-30|South_Africa	MT	EPI_ISL_11999061	South_Africa	2022-03-30	BA.2	BA.2	BA.2	0.5	0.08	1	59	64.1304	1.08696
hCoV-19/France/BFC-HMN-22042050651/2022	MT|BA.2|EPI_ISL_12412782|2022-03-28|France	MT	EPI_ISL_12412782	France	2022-03-28	BA.2	BA.2	BA.2	0.5	0.08	1	48	52.1739	1.08696
hCoV-19/Slovakia/BA_22_00028369/2022	MT|BA.2|EPI_ISL_12851970|2022-04-23|Slovakia	MT	EPI_ISL_12851970	Slovakia	2022-04-23	BA.2	BA.2	BA.2	0	0.08	1	47	51.087	1.08696
hCoV-19/Spain/CL-COV29196/2022	MT|BA.2|EPI_ISL_13092554|2022-04-09|Spain	MT	EPI_ISL_13092554	Spain	2022-04-09	BA.2	BA.2	BA.2	0	0.08	1	47	51.087	1.08696
hCoV-19/USA/NY-CDC-LC0664154/2022	MT|BA.2|EPI_ISL_13117669|2022-05-16|USA	MT	EPI_ISL_13117669	USA	2022-05-16	BA.2	BA.2	BA.2	0.666667	0.08	1	46	50	1.08696
hCoV-19/USA/NY-CDC-LC0664186/2022	MT|BA.2|EPI_ISL_13118104|2022-05-17|USA	MT	EPI_ISL_13118104	USA	2022-05-17	BA.2	BA.2	BA.2	0	0.08	1	44	47.8261	1.08696
hCoV-19/India/GJ-INSACOG-GBRC6596/2022	MT|BA.2|EPI_ISL_13499606|2022-02-28|India	MT	EPI_ISL_13499606	India	2022-02-28	BA.2	BA.2	BA.2	0	0.08	2	44	47.8261	2.17391
hCoV-19/Northern Ireland/NIRE-01d491/2022	MT|BA.2|EPI_ISL_13615804|2022-05-14|Northern_Ireland	MT	EPI_ISL_13615804	Northern_Ireland	2022-05-14	BA.2	BA.2	BA.2	0	0.08	0	65	70.6522	0
hCoV-19/India/WB-INSACOG-1931503253649/2022	MT|BA.2|EPI_ISL_14303124|2022-07-14|India	MT	EPI_ISL_14303124	India	2022-07-14	BA.2	BA.2	BA.2	0	0.08	1	42	45.6522	1.08696
hCoV-19/India/MH-INSACOG-CSIR-NEERI2590/2022	MT|BA.2|EPI_ISL_14568795|2022-07-18|India	MT	EPI_ISL_14568795	India	2022-07-18	BA.2.75	BA.2	BA.2.75	0.5	0.08	4	47	51.087	4.34783
hCoV-19/Mongolia/UB-60983/2022	MT|BA.2|EPI_ISL_14718253|2022-04-27|Mongolia	MT	EPI_ISL_14718253	Mongolia	2022-04-27	BA.2	BA.2	BA.2	0.333333	0.08	1	56	60.8696	1.08696
hCoV-19/India/WB-INSACOG-1931503301623/2022	MT|BA.2|EPI_ISL_14891602|2022-08-08|India	MT	EPI_ISL_14891602	India	2022-08-08	BA.2	BA.2	BA.2	0	0.08	1	46	50	1.08696
hCoV-19/India/KA-SLS-SEQ-42296/2022	MT|BA.2|EPI_ISL_14993203|2022-07-27|India	MT	EPI_ISL_14993203	India	2022-07-27	BA.2.75	BA.2	BA.2.75	0.666667	0.08	2	50	54.3478	2.17391
hCoV-19/India/GJ-INSACOG-GBRC8411/2022	MT|BA.2|EPI_ISL_15057984|2022-08-09|India	MT	EPI_ISL_15057984	India	2022-08-09	BA.2	BA.2	BA.2	0	0.08	2	40	43.4783	2.17391
hCoV-19/India/GJ-INSACOG-GBRC8808/2022	MT|BA.2|EPI_ISL_15073998|2022-08-29|India	MT	EPI_ISL_15073998	India	2022-08-29	BA.2	BA.2	BA.2	0	0.08	2	48	52.1739	2.17391
hCoV-19/India/OR-RMRC_B-ICMR-INSACOG-BBS431132/2022	MT|BA.2|EPI_ISL_15231508|2022-09-21|India	MT	EPI_ISL_15231508	India	2022-09-21	BA.2	BA.2	BA.2	0.5	0.08	4	50	54.3478	4.34783
hCoV-19/Sweden/01_SE100_22CS508903/2022	MT|BA.2|EPI_ISL_15393389|2022-10-07|Sweden	MT	EPI_ISL_15393389	Sweden	2022-10-07	BA.2	BA.2	BA.2	0.333333	0.08	1	57	61.9565	1.08696
hCoV-19/Canada/SK-RRPL-543339/2022	MT|BA.2|EPI_ISL_15731233|2022-10-22|Canada	MT	EPI_ISL_15731233	Canada	2022-10-22	BA.2	BA.2	BA.2	0	0.08	1	71	77.1739	1.08696
hCoV-19/Pakistan/NIH-B112-S6/2022	MT|BA.2|EPI_ISL_15850309|2022-11-01|Pakistan	MT	EPI_ISL_15850309	Pakistan	2022-11-01	BA.2	BA.2	BA.2	0	0.08	1	44	47.8261	1.08696
hCoV-19/Russia/MOW-PMVL-DZ-60653493516/2022	MT|BA.2|EPI_ISL_15865417|2022-06-30|Russia	MT	EPI_ISL_15865417	Russia	2022-06-30	BA.2	BA.2	BA.2	0	0.08	1	56	60.8696	1.08696
hCoV-19/Malaysia/IMR_OS7513/2022	MT|BA.2|EPI_ISL_16040719|2022-11-07|Malaysia	MT	EPI_ISL_16040719	Malaysia	2022-11-07	BA.2	BA.2	BA.2	0	0.08	4	53	57.6087	4.34783
hCoV-19/Malaysia/HPUPM_NGS0646/2022	MT|BA.2|EPI_ISL_16046997|2022-09-05|Malaysia	MT	EPI_ISL_16046997	Malaysia	2022-09-05	BA.2	BA.2	BA.2	0	0.08	4	52	56.5217	4.34783
hCoV-19/India/WB-1931503354628/2022	MT|BA.2|EPI_ISL_16183022|2022-09-30|India	MT	EPI_ISL_16183022	India	2022-09-30	BA.2	BA.2	BA.2	0	0.08	3	71	77.1739	3.26087
hCoV-19/India/OR-RMRC_B-ICMR-BBS-431835/2022	MT|BA.2|EPI_ISL_16350706|2022-10-17|India	MT	EPI_ISL_16350706	India	2022-10-17	BA.2	BA.2	BA.2	0	0.08	5	53	57.6087	5.43478
hCoV-19/Italy/SIC-CQRC-3422072767/2022	MT|BA.2|EPI_ISL_16612088|2022-12-22|Italy	MT	EPI_ISL_16612088	Italy	2022-12-22	BA.2	BA.2	BA.2	0	0.08	3	65	70.6522	3.26087
hCoV-19/Mauritius/60199/2022	MT|BA.2|EPI_ISL_16741242|2022-11-24|Mauritius	MT	EPI_ISL_16741242	Mauritius	2022-11-24	BA.2	BA.2	BA.2	0	0.08	4	59	64.1304	4.34783
hCoV-19/India/KA-SLS-SEQ-54012/2023	MT|BA.2|EPI_ISL_17206430|2023-02-04|India	MT	EPI_ISL_17206430	India	2023-02-04	BA.2	BA.2	BA.2	0	0.08	1	52	56.5217	1.08696
hCoV-19/Germany/BY-RKI-I-1122125/2023	MT|BA.2|EPI_ISL_17256234|2023-02-28|Germany	MT	EPI_ISL_17256234	Germany	2023-02-28	BA.2	BA.2	BA.2	0.5	0.08	3	40	43.4783	3.26087
hCoV-19/Italy/SIC-CQRC-3423008151/2023	MT|BA.2|EPI_ISL_17258201|2023-02-27|Italy	MT	EPI_ISL_17258201	Italy	2023-02-27	BA.2	BA.2	BA.2	0	0.08	3	62	67.3913	3.26087
hCoV-19/India/MH-INSACOG-CSIR-NEERI2669/2022	MT|BA.2|EPI_ISL_17424755|2022-08-19|India	MT	EPI_ISL_17424755	India	2022-08-19	BA.2.75	BA.2	BA.2.75	0.5	0.08	4	26	28.2609	4.34783
hCoV-19/India/TG-CDFD-E130444/2022	MT|BA.2|EPI_ISL_17608962|2022-07-10|India	MT	EPI_ISL_17608962	India	2022-07-10	BA.2	BA.2	BA.2	0	0.08	3	52	56.5217	3.26087
hCoV-19/Luxembourg/LNS8818436/2023	FG|JN.1|EPI_ISL_18286580|2023-08-25|Luxembourg	FG	EPI_ISL_18286580	Luxembourg	2023-08-25	BA.2.86*	JN.1	JN.1	0	0.08	16	65	70.6522	17.3913
hCoV-19/South Africa/NICD-GP-0248/2023	FG|BA.2.86|EPI_ISL_18612201|2023-08-23|South_Africa	FG	EPI_ISL_18612201	South_Africa	2023-08-23	BA.2.86*	BA.2.86	BA.2.86	0	0.08	23	82	89.1304	25
hCoV-19/Italy/LOM_Niguarda_45108620PIE/2023	MT|BA.2|EPI_ISL_18722001|2023-12-28|Italy	MT	EPI_ISL_18722001	Italy	2023-12-28	BA.2	BA.2	BA.2	0	0.08	16	76	82.6087	17.3913
hCoV-19/USA/TX-HMH-M-136953/2023	MT|BA.2|EPI_ISL_18743094|2023-12-27|USA	MT	EPI_ISL_18743094	USA	2023-12-27	BA.2	BA.2	BA.2	0	0.08	16	73	79.3478	17.3913
hCoV-19/USA/TX-HMH-M-136542/2023	MT|BA.2|EPI_ISL_18743452|2023-12-18|USA	MT	EPI_ISL_18743452	USA	2023-12-18	BA.2	BA.2	BA.2	0	0.08	14	44	47.8261	15.2174
hCoV-19/Malaysia/MGVI_GV0528/2023	MT|BA.2|EPI_ISL_18908106|2023-12-07|Malaysia	MT	EPI_ISL_18908106	Malaysia	2023-12-07	JN.1*	BA.2	BA.2	0	0.08	5	59	64.1304	5.43478
hCoV-19/Malaysia/MGVI_GV0528/2023	MT|BA.2|EPI_ISL_18908106|2023-12-07|Malaysia	MT	EPI_ISL_18908106	Malaysia	2023-12-07	BA.2	BA.2	BA.2	0	0.08	5	59	64.1304	5.43478
hCoV-19/Denmark/DCGC-440528/2022	MT|BA.2|EPI_ISL_11345266|2022-03-11|Denmark	MT	EPI_ISL_11345266	Denmark	2022-03-11	BA.2	BA.2	BA.2	0	0.07	0	53	56.9892	0
hCoV-19/Israel/ICH-741212765/2022	MT|BA.2|EPI_ISL_11860822|2022-03-27|Israel	MT	EPI_ISL_11860822	Israel	2022-03-27	BA.2	BA.2	BA.2	0.333333	0.07	1	60	64.5161	1.07527
hCoV-19/Canada/AB-ABPHL-59498/2022	MT|BA.2|EPI_ISL_11996287|2022-03-19|Canada	MT	EPI_ISL_11996287	Canada	2022-03-19	BA.2	BA.2	BA.2	0	0.07	1	57	61.2903	1.07527
hCoV-19/France/BRE-CHUP-8600863222/2022	MT|BA.2|EPI_ISL_12076663|2022-03-30|France	MT	EPI_ISL_12076663	France	2022-03-30	BA.2	BA.2	BA.2	0	0.07	0	66	70.9677	0
hCoV-19/France/ARA-GENBIO-14291032651/2022	MT|BA.2|EPI_ISL_12153872|2022-04-13|France	MT	EPI_ISL_12153872	France	2022-04-13	BA.2	BA.2	BA.2	0	0.07	1	57	61.2903	1.07527
hCoV-19/Denmark/DCGC-488393/2022	MT|BA.2|EPI_ISL_12207973|2022-04-15|Denmark	MT	EPI_ISL_12207973	Denmark	2022-04-15	BA.2	BA.2	BA.2	0	0.07	0	57	61.2903	0
hCoV-19/France/NAQ-GENBIO-B04GN1014161/2022	MT|BA.2|EPI_ISL_12251451|2022-04-11|France	MT	EPI_ISL_12251451	France	2022-04-11	BA.2	BA.2	BA.2	0	0.07	0	57	61.2903	0
hCoV-19/France/OCC-GENBIO-L07GN0915138/2022	MT|BA.2|EPI_ISL_12251504|2022-04-01|France	MT	EPI_ISL_12251504	France	2022-04-01	BA.2	BA.2	BA.2	0	0.07	0	57	61.2903	0
hCoV-19/Romania/BR-18774/2022	MT|BA.2|EPI_ISL_12603719|2022-04-06|Romania	MT	EPI_ISL_12603719	Romania	2022-04-06	BA.2	BA.2	BA.2	0	0.07	0	42	45.1613	0
hCoV-19/Israel/ICH-741225159/2022	MT|BA.2|EPI_ISL_12935114|2022-05-15|Israel	MT	EPI_ISL_12935114	Israel	2022-05-15	BA.2	BA.2	BA.2	0	0.07	1	63	67.7419	1.07527
hCoV-19/Czech Republic/CSQ8036/2022	MT|BA.2|EPI_ISL_13158488|2022-05-24|Czech_Republic	MT	EPI_ISL_13158488	Czech_Republic	2022-05-24	BA.2	BA.2	BA.2	0	0.07	0	59	63.4409	0
hCoV-19/USA/VA-CDC-LC0674362/2022	MT|BA.2|EPI_ISL_13220451|2022-05-27|USA	MT	EPI_ISL_13220451	USA	2022-05-27	BA.2	BA.2	BA.2	0	0.07	1	58	62.3656	1.07527
hCoV-19/India/KA-RFNB-10037/2022	MT|BA.2|EPI_ISL_13373047|2022-06|India	MT	EPI_ISL_13373047	India	2022-06	BA.2	BA.2	BA.2	0.5	0.07	0	58	62.3656	0
hCoV-19/Canada/ON-KHS-22-07872-v1/2022	MT|BA.2|EPI_ISL_13410274|2022-06-10|Canada	MT	EPI_ISL_13410274	Canada	2022-06-10	BA.2	BA.2	BA.2	0	0.07	0	59	63.4409	0
hCoV-19/USA/LA-BIE-LSUH003359/2022	MT|BA.2|EPI_ISL_13908553|2022-07-07|USA	MT	EPI_ISL_13908553	USA	2022-07-07	BA.2	BA.2	BA.2	0.333333	0.07	0	44	47.3118	0
hCoV-19/India/OR-RMRC_B-ICMR-INSACOG-BBS425060/2022	MT|BA.2|EPI_ISL_13953676|2022-07-04|India	MT	EPI_ISL_13953676	India	2022-07-04	BA.2	BA.2	BA.2	0	0.07	0	47	50.5376	0
hCoV-19/India/OR-RMRC_B-ICMR-INSACOG-BBS425213/2022	MT|BA.2|EPI_ISL_13953682|2022-07-06|India	MT	EPI_ISL_13953682	India	2022-07-06	BA.2	BA.2	BA.2	0	0.07	0	46	49.4624	0
hCoV-19/Australia/SA430797/2022	MT|BA.2|EPI_ISL_14467169|2022-07-27|Australia	MT	EPI_ISL_14467169	Australia	2022-07-27	BA.2	BA.2	BA.2	0.5	0.07	0	70	75.2688	0
hCoV-19/Spain/CL-COV35578/2022	MT|BA.2|EPI_ISL_14747075|2022-07-06|Spain	MT	EPI_ISL_14747075	Spain	2022-07-06	BA.2	BA.2.65 (consensus call)	BA.2	0	0.07	1	42	45.1613	1.07527
hCoV-19/India/KA-SLS-SEQ-42283/2022	MT|BA.2|EPI_ISL_14993190|2022-07-26|India	MT	EPI_ISL_14993190	India	2022-07-26	BA.2	BA.2	BA.2	0	0.07	2	54	58.0645	2.15054
hCoV-19/India/GJ-INSACOG-GBRC8383/2022	MT|BA.2|EPI_ISL_15057956|2022-08-01|India	MT	EPI_ISL_15057956	India	2022-08-01	BA.2	BA.2	BA.2	0	0.07	2	46	49.4624	2.15054
hCoV-19/India/GJ-INSACOG-GBRC8391/2022	MT|BA.2|EPI_ISL_15057964|2022-08-08|India	MT	EPI_ISL_15057964	India	2022-08-08	BA.2	BA.2	BA.2	0	0.07	3	48	51.6129	3.22581
hCoV-19/Nepal/NPHL-S-1858/2022	MT|BA.2|EPI_ISL_15313054|2022-09-05|Nepal	MT	EPI_ISL_15313054	Nepal	2022-09-05	BA.2	BA.2	BA.2	0	0.07	1	34	36.5591	1.07527
hCoV-19/India/GJ-GBRC9309/2022	MT|BA.2|EPI_ISL_15661483|2022-09-21|India	MT	EPI_ISL_15661483	India	2022-09-21	BA.2	BA.2	BA.2	0	0.07	3	45	48.3871	3.22581
hCoV-19/India/DL-NII-1462/2022	MT|BA.2|EPI_ISL_15757331|2022-10-10|India	MT	EPI_ISL_15757331	India	2022-10-10	BA.2	BA.2	BA.2	0	0.07	4	32	34.4086	4.30108
hCoV-19/India/MH-ICMR-NIV-INSACOG-NIVSARI-22-3009/2022	MT|BA.2|EPI_ISL_15854986|2022-10-18|India	MT	EPI_ISL_15854986	India	2022-10-18	BA.2	BA.2	BA.2	0	0.07	4	49	52.6882	4.30108
hCoV-19/Russia/SPE-RII-MH111627S/2022	MT|BA.2|EPI_ISL_15920181|2022-11-07|Russia	MT	EPI_ISL_15920181	Russia	2022-11-07	BA.2	BA.2	BA.2	0	0.07	2	87	93.5484	2.15054
hCoV-19/Malaysia/MKAKK_WC536/2022	MT|BA.2|EPI_ISL_15982990|2022-11-15|Malaysia	MT	EPI_ISL_15982990	Malaysia	2022-11-15	BA.2	BA.2	BA.2	0.333333	0.07	2	51	54.8387	2.15054
hCoV-19/Germany/BY-RKI-I-1042545/2022	MT|BA.2|EPI_ISL_16041723|2022-11-11|Germany	MT	EPI_ISL_16041723	Germany	2022-11-11	BA.2	BA.2	BA.2	0	0.07	2	48	51.6129	2.15054
hCoV-19/Malaysia/HPUPM_NGS0742/2022	MT|BA.2|EPI_ISL_16449528|2022-11-07|Malaysia	MT	EPI_ISL_16449528	Malaysia	2022-11-07	BA.2.75	BA.2	BA.2.75	0.333333	0.07	4	65	69.8925	4.30108
hCoV-19/Malaysia/HPUPM_NGS0838/2022	MT|BA.2|EPI_ISL_16465351|2022-11-16|Malaysia	MT	EPI_ISL_16465351	Malaysia	2022-11-16	BA.2.75	BA.2	BA.2.75	0.5	0.07	5	65	69.8925	5.37634
hCoV-19/Germany/BY-RKI-I-1076575/2022	MT|BA.2|EPI_ISL_16487232|2022-12-27|Germany	MT	EPI_ISL_16487232	Germany	2022-12-27	BA.2	BA.2	BA.2	0	0.07	2	42	45.1613	2.15054
hCoV-19/Spain/MD-HRYC-12604174/2023	MT|BA.2|EPI_ISL_16613416|2023-01-13|Spain	MT	EPI_ISL_16613416	Spain	2023-01-13	BA.2	BA.2	BA.2	0	0.07	5	64	68.8172	5.37634
hCoV-19/Morocco/IPM20433896/2022	MT|BA.2|EPI_ISL_16649933|2022-12-29|Morocco	MT	EPI_ISL_16649933	Morocco	2022-12-29	BA.2	BA.2	BA.2	0	0.07	4	63	67.7419	4.30108
hCoV-19/Malaysia/HPUPM_NGS0917/2022	MT|BA.2|EPI_ISL_17037237|2022-12-14|Malaysia	MT	EPI_ISL_17037237	Malaysia	2022-12-14	BA.2	BA.2	BA.2	0	0.07	3	58	62.3656	3.22581
hCoV-19/Malaysia/HPUPM_NGS0936/2023	MT|BA.2|EPI_ISL_17037256|2023-01-02|Malaysia	MT	EPI_ISL_17037256	Malaysia	2023-01-02	BA.2	BA.2	BA.2	0	0.07	4	54	58.0645	4.30108
hCoV-19/Germany/BY-RKI-I-1122141/2023	MT|BA.2|EPI_ISL_17256250|2023-02-27|Germany	MT	EPI_ISL_17256250	Germany	2023-02-27	BA.2	BA.2	BA.2	0.5	0.07	3	41	44.086	3.22581
hCoV-19/India/MH-CSIR-NEERI3050/2023	MT|BA.2|EPI_ISL_17592056|2023-04-08|India	MT	EPI_ISL_17592056	India	2023-04-08	BA.2	BA.2	BA.2	0	0.07	2	86	92.4731	2.15054
hCoV-19/Germany/BY-RKI-I-1134659/2023	MT|BA.2|EPI_ISL_17613068|2023-03-29|Germany	MT	EPI_ISL_17613068	Germany	2023-03-29	BA.2	BA.2	BA.2	0.5	0.07	3	42	45.1613	3.22581
hCoV-19/India/CH-NII-1796/2023	MT|BA.2|EPI_ISL_17717696|2023-04-22|India	MT	EPI_ISL_17717696	India	2023-04-22	BA.2	BA.2	BA.2	0	0.07	5	37	39.7849	5.37634
hCoV-19/Italy/SIC-CQRC-3423017201-2023/2023	BG|XBB.1.5|EPI_ISL_18015782|2023-07-11|Italy	BG	EPI_ISL_18015782	Italy	2023-07-11	XBB.1.5	XBB.1.5	XBB.1.5	0	0.07	5	75	80.6452	5.37634
hCoV-19/Colombia/DC-LSPSDS-32723/2023	BG|XBB.1.5.72|EPI_ISL_18058310|2023-07-06|Colombia	BG	EPI_ISL_18058310	Colombia	2023-07-06	Others	XBB.1.5.72	XBB.1.5.72	0	0.07	5	60	64.5161	5.37634
hCoV-19/Argentina/PAIS-A1775/2023	BG|XBB.1.5.103|EPI_ISL_18097217|2023-07-20|Argentina	BG	EPI_ISL_18097217	Argentina	2023-07-20	XBB.1.5	XBB.1.5.103	XBB.1.5.103	0	0.07	5	74	79.5699	5.37634
hCoV-19/USA/CA-LACPHL-AY01096/2023	BG|XBB.1.5.77|EPI_ISL_18107916|2023-07-19|USA	BG	EPI_ISL_18107916	USA	2023-07-19	XBB.1.5	XBB.1.5.77	XBB.1.5.77	0	0.07	5	72	77.4194	5.37634
hCoV-19/Thailand/NIH-09-1483-8-02/2022	MT|BA.2|EPI_ISL_18496421|2022-07-26|Thailand	MT	EPI_ISL_18496421	Thailand	2022-07-26	BA.2	BA.2	BA.2	0	0.07	2	54	58.0645	2.15054
hCoV-19/Spain/GA-CHUAC-11735/2023	FG|JN.10|EPI_ISL_18567604|2023-11-24|Spain	FG	EPI_ISL_18567604	Spain	2023-11-24	BA.2.86*	JN.10	JN.10	0	0.07	23	82	88.172	24.7312
hCoV-19/USA/UT-UPHL-231221967670/2023	MT|BA.2|EPI_ISL_18692207|2023-12-07|USA	MT	EPI_ISL_18692207	USA	2023-12-07	BA.2.86*	BA.2	BA.2	0	0.07	16	83	89.2473	17.2043
hCoV-19/Austria/AGES-AZ-1675562/2023	FG|JN.1|EPI_ISL_18704201|2023-02-20|Austria	FG	EPI_ISL_18704201	Austria	2023-12-20	JN.1*	JN.1	JN.1	0	0.07	30	99	106.452	32.2581
hCoV-19/Italy/LOM_Niguarda_45107521POL/2023	MT|BA.2|EPI_ISL_18722007|2023-12-24|Italy	MT	EPI_ISL_18722007	Italy	2023-12-24	BA.2	BA.2	BA.2	0	0.07	18	76	81.7204	19.3548
hCoV-19/USA/TX-HMH-M-136978/2023	MT|BA.2|EPI_ISL_18743336|2023-12-30|USA	MT	EPI_ISL_18743336	USA	2023-12-30	BA.2	BA.2	BA.2	0	0.07	16	73	78.4946	17.2043
hCoV-19/USA/TX-HMH-M-136992/2024	MT|BA.2|EPI_ISL_18743350|2024-01-01|USA	MT	EPI_ISL_18743350	USA	2024-01-01	BA.2	BA.2	BA.2	0	0.07	15	128	137.634	16.129
hCoV-19/USA/TX-HMH-M-137050/2023	MT|BA.2|EPI_ISL_18743360|2023-12-29|USA	MT	EPI_ISL_18743360	USA	2023-12-29	BA.2	BA.2	BA.2	0	0.07	11	66	70.9677	11.828
hCoV-19/USA/TX-HMH-M-136583/2023	MT|BA.2|EPI_ISL_18743469|2023-12-18|USA	MT	EPI_ISL_18743469	USA	2023-12-18	BA.2	BA.2	BA.2	0	0.07	14	77	82.7957	15.0538
hCoV-19/USA/TX-HMH-M-136404/2023	MT|BA.2|EPI_ISL_18743530|2023-12-15|USA	MT	EPI_ISL_18743530	USA	2023-12-15	BA.2	BA.2	BA.2	0	0.07	10	72	77.4194	10.7527
hCoV-19/USA/TX-HMH-M-136482/2023	MT|BA.2|EPI_ISL_18743570|2023-12-18|USA	MT	EPI_ISL_18743570	USA	2023-12-18	BA.2	BA.2	BA.2	0	0.07	21	88	94.6237	22.5806
hCoV-19/USA/NJ-PHEL-V23019977/2023	MT|BA.2|EPI_ISL_18749820|2023-12-19|USA	MT	EPI_ISL_18749820	USA	2023-12-19	BA.2	BA.2	BA.2	0	0.07	6	58	62.3656	6.45161
hCoV-19/Spain/CL-COV45556/2023	MT|BA.2|EPI_ISL_18777754|2023-12-10|Spain	MT	EPI_ISL_18777754	Spain	2023-12-10	JN.1*	BA.2	BA.2	0	0.07	12	70	75.2688	12.9032
hCoV-19/Austria/AGES-1100342/2024	FG|JN.1|EPI_ISL_18790030|2023-01-05|Austria	FG	EPI_ISL_18790030	Austria	2024-01-05	BA.2	JN.1	JN.1	0	0.07	30	97	104.301	32.2581
hCoV-19/USA/CA-HLX-STM-5NJXMCJ3R/2023	MT|BA.2|EPI_ISL_18817867|2023-12-29|USA	MT	EPI_ISL_18817867	USA	2023-12-29	JN.1*	BA.2	JN.1.1	0.5	0.07	8	55	59.1398	8.60215
hCoV-19/Spain/CL-COV45725/2024	MT|BA.2|EPI_ISL_18830379|2024-01-02|Spain	MT	EPI_ISL_18830379	Spain	2024-01-02	BA.2	BA.2	XDD	0	0.07	16	42	45.1613	17.2043
hCoV-19/Malaysia/UiTM3566/2024	MT|BA.2|EPI_ISL_18841626|2024-01-09|Malaysia	MT	EPI_ISL_18841626	Malaysia	2024-01-09	JN.1*	BA.2	BA.2	0.944444	0.07	7	47	50.5376	7.52688
hCoV-19/Russia/ME-RII-MH157523S/2023	MT|BA.2|EPI_ISL_18845691|2023-12-06|Russia	MT	EPI_ISL_18845691	Russia	2023-12-06	BA.2	BA.2	BA.2	0	0.07	19	86	92.4731	20.4301
hCoV-19/Germany/NW-RKI-I-555210/2022	MT|BA.2|EPI_ISL_10294968|2022-02-12|Germany	MT	EPI_ISL_10294968	Germany	2022-02-12	BA.2	BA.2	BA.2	0	0.06	0	59	62.766	0
hCoV-19/Germany/NW-RKI-I-593151/2022	MT|BA.2|EPI_ISL_10910666|2022-02-24|Germany	MT	EPI_ISL_10910666	Germany	2022-02-24	BA.2	BA.2	BA.2	0	0.06	0	59	62.766	0
hCoV-19/South Africa/NICD-N35798/2022	MT|BA.2|EPI_ISL_11105183|2022-02-08|South_Africa	MT	EPI_ISL_11105183	South_Africa	2022-02-08	BA.2	BA.2	BA.2	0	0.06	0	58	61.7021	0
hCoV-19/England/LSPA-3A3DA90/2022	MT|BA.2|EPI_ISL_11120723|2022-03-09|England	MT	EPI_ISL_11120723	England	2022-03-09	BA.2	BA.2	BA.2	0	0.06	0	60	63.8298	0
hCoV-19/England/PLYM-3B59CF1/2022	MT|BA.2|EPI_ISL_11387607|2022-03-17|England	MT	EPI_ISL_11387607	England	2022-03-17	BA.2	BA.2	BA.2	0	0.06	0	58	61.7021	0
hCoV-19/England/ALDP-3B8320B/2022	MT|BA.2|EPI_ISL_11416629|2022-03-19|England	MT	EPI_ISL_11416629	England	2022-03-19	BA.2	BA.2	BA.2	0	0.06	0	59	62.766	0
hCoV-19/England/LSPA-3C35E21/2022	MT|BA.2|EPI_ISL_11598905|2022-03-23|England	MT	EPI_ISL_11598905	England	2022-03-23	BA.2	BA.2	BA.2	0.25	0.06	0	53	56.383	0
hCoV-19/England/PHEP-YYRTCQT/2022	MT|BA.2|EPI_ISL_11661766|2022-03-16|England	MT	EPI_ISL_11661766	England	2022-03-16	BA.2	BA.2	BA.2	0.333333	0.06	0	58	61.7021	0
hCoV-19/USA/WA-CDC-UW22032362033/2022	MT|BA.2|EPI_ISL_11740857|2022-03-23|USA	MT	EPI_ISL_11740857	USA	2022-03-23	BA.2	BA.2	BA.2	0.333333	0.06	0	55	58.5106	0
hCoV-19/Israel/ICH-741207883/2022	MT|BA.2|EPI_ISL_11850657|2022-03-18|Israel	MT	EPI_ISL_11850657	Israel	2022-03-18	BA.2	BA.2	BA.2	0	0.06	0	59	62.766	0
hCoV-19/England/LSPA-3D32B86/2022	MT|BA.2|EPI_ISL_12067223|2022-04-07|England	MT	EPI_ISL_12067223	England	2022-04-07	BA.2	BA.2	BA.2	0	0.06	0	56	59.5745	0
hCoV-19/France/OCC-GENBIO-X96GN0880139/2022	MT|BA.2|EPI_ISL_12070492|2022-03-29|France	MT	EPI_ISL_12070492	France	2022-03-29	BA.2	BA.2	BA.2	0	0.06	0	58	61.7021	0
hCoV-19/England/PHEC-YYRJAPA/2022	MT|BA.2|EPI_ISL_12103835|2022-03-16|England	MT	EPI_ISL_12103835	England	2022-03-16	BA.2	BA.2	BA.2	0	0.06	0	56	59.5745	0
hCoV-19/Germany/BB-RKI-I-720086/2022	MT|BA.2|EPI_ISL_12188711|2022-03-30|Germany	MT	EPI_ISL_12188711	Germany	2022-03-30	BA.2	BA.2	BA.2	0.5	0.06	0	49	52.1277	0
hCoV-19/England/PHEP-YYRZ5OT/2022	MT|BA.2|EPI_ISL_12205232|2022-03-28|England	MT	EPI_ISL_12205232	England	2022-03-28	BA.2	BA.2	BA.2	0	0.06	0	59	62.766	0
hCoV-19/France/OCC-GENBIO-L67GN0950502/2022	MT|BA.2|EPI_ISL_12251827|2022-04-05|France	MT	EPI_ISL_12251827	France	2022-04-05	BA.2	BA.2	BA.2	0	0.06	0	58	61.7021	0
hCoV-19/England/PHEC-YYRSTZX/2022	MT|BA.2|EPI_ISL_12287688|2022-04-09|England	MT	EPI_ISL_12287688	England	2022-04-09	BA.2	BA.2	BA.2	0	0.06	0	57	60.6383	0
hCoV-19/England/PHEC-YYRZUY4/2022	MT|BA.2|EPI_ISL_12347747|2022-04-10|England	MT	EPI_ISL_12347747	England	2022-04-10	BA.2	BA.2	BA.2	0.333333	0.06	0	50	53.1915	0
hCoV-19/Spain/CL-28217/2022	MT|BA.2|EPI_ISL_12350636|2022-03-27|Spain	MT	EPI_ISL_12350636	Spain	2022-03-27	BA.2	BA.2	BA.2	0.333333	0.06	0	44	46.8085	0
hCoV-19/France/GES-HMN-22042130636/2022	MT|BA.2|EPI_ISL_12411949|2022-04-11|France	MT	EPI_ISL_12411949	France	2022-04-11	BA.2	BA.2	BA.2	0	0.06	1	55	58.5106	1.06383
hCoV-19/Canada/AB-ABPHL-61115/2022	MT|BA.2|EPI_ISL_12423980|2022-03-30|Canada	MT	EPI_ISL_12423980	Canada	2022-03-30	BA.2	BA.2	BA.2	0	0.06	0	59	62.766	0
hCoV-19/Canada/AB-ABPHL-61424/2022	MT|BA.2|EPI_ISL_12424015|2022-03-30|Canada	MT	EPI_ISL_12424015	Canada	2022-03-30	BA.2	BA.2	BA.2	0.5	0.06	0	59	62.766	0
hCoV-19/England/PHEC-YYRHD81/2022	MT|BA.2|EPI_ISL_12445315|2022-04-13|England	MT	EPI_ISL_12445315	England	2022-04-13	BA.2	BA.2	BA.2	0	0.06	0	56	59.5745	0
hCoV-19/Israel/ICH-741217461/2022	MT|BA.2|EPI_ISL_12455590|2022-04-15|Israel	MT	EPI_ISL_12455590	Israel	2022-04-15	BA.2	BA.2	BA.2	0	0.06	0	52	55.3191	0
hCoV-19/Scotland/QEUH-3DD86BE/2022	MT|BA.2|EPI_ISL_12490249|2022-04-27|Scotland	MT	EPI_ISL_12490249	Scotland	2022-04-27	BA.2	BA.2	BA.2	0	0.06	0	57	60.6383	0
hCoV-19/USA/NY-NYCPHL-011097/2022	MT|BA.2|EPI_ISL_12564055|2022-04-04|USA	MT	EPI_ISL_12564055	USA	2022-04-04	BA.2	BA.2	BA.2	0.5	0.06	0	50	53.1915	0
hCoV-19/Australia/NSW-ICPMR-25140/2022	MT|BA.2|EPI_ISL_12679267|2022-05-01|Australia	MT	EPI_ISL_12679267	Australia	2022-05-01	BA.2	BA.2	BA.2	0	0.06	0	56	59.5745	0
hCoV-19/Germany/NW-RKI-I-799336/2022	MT|BA.2|EPI_ISL_12739242|2022-05-09|Germany	MT	EPI_ISL_12739242	Germany	2022-05-09	BA.2	BA.2	BA.2	0	0.06	0	57	60.6383	0
hCoV-19/USA/IN-GD-051222-146/2022	MT|BA.2|EPI_ISL_12759653|2022-04-21|USA	MT	EPI_ISL_12759653	USA	2022-04-21	BA.2	BA.2	BA.2	0	0.06	1	52	55.3191	1.06383
hCoV-19/France/OCC-GENBIO-F05001366344/2022	MT|BA.2|EPI_ISL_12854484|2022-05-16|France	MT	EPI_ISL_12854484	France	2022-05-16	BA.2	BA.2	BA.2	0	0.06	0	60	63.8298	0
hCoV-19/India/KA-RFNB-8185/2022	MT|BA.2|EPI_ISL_12872115|2022-05|India	MT	EPI_ISL_12872115	India	2022-05	BA.2	BA.2	BA.2	0.5	0.06	0	57	60.6383	0
hCoV-19/Trinidad and Tobago/155435/2022	MT|BA.2|EPI_ISL_12877781|2022-04-19|Trinidad_and_Tobago	MT	EPI_ISL_12877781	Trinidad_and_Tobago	2022-04-19	BA.2	BA.2	BA.2	0.333333	0.06	0	53	56.383	0
hCoV-19/USA/CA-Curative-344205/2022	MT|BA.2|EPI_ISL_12915223|2022-05-15|USA	MT	EPI_ISL_12915223	USA	2022-05-15	BA.2	BA.2.65 (consensus call)	BA.2	0	0.06	1	48	51.0638	1.06383
hCoV-19/Germany/SN-RKI-I-828831/2022	MT|BA.2|EPI_ISL_13010033|2022-05-16|Germany	MT	EPI_ISL_13010033	Germany	2022-05-16	BA.2	BA.2	BA.2	0.6	0.06	1	34	36.1702	1.06383
hCoV-19/France/OCC-GENBIO-U16CV1430061/2022	MT|BA.2|EPI_ISL_13027894|2022-05-23|France	MT	EPI_ISL_13027894	France	2022-05-23	BA.2	BA.2	BA.2	0	0.06	1	59	62.766	1.06383
hCoV-19/Germany/NW-RKI-I-837184/2022	MT|BA.2|EPI_ISL_13035015|2022-03-22|Germany	MT	EPI_ISL_13035015	Germany	2022-03-22	BA.2	BA.2	BA.2	0	0.06	0	49	52.1277	0
hCoV-19/France/PAC-IHU-076856_Nova1/2022	MT|BA.2|EPI_ISL_13084121|2022-04|France	MT	EPI_ISL_13084121	France	2022-04	BA.2	BA.2	BA.2	0	0.06	1	55	58.5106	1.06383
hCoV-19/England/PHEC-YYFPJD1/2022	MT|BA.2|EPI_ISL_13131463|2022-05-26|England	MT	EPI_ISL_13131463	England	2022-05-26	BA.2	BA.2	BA.2	0.25	0.06	0	65	69.1489	0
hCoV-19/France/OCC-GENBIO-C02GN1530254/2022	MT|BA.2|EPI_ISL_13264330|2022-06-02|France	MT	EPI_ISL_13264330	France	2022-06-02	BA.2	BA.2	BA.2	0	0.06	1	61	64.8936	1.06383
hCoV-19/England/QEUH-3E51CC9/2022	MT|BA.2|EPI_ISL_13338600|2022-06-10|England	MT	EPI_ISL_13338600	England	2022-06-10	BA.2	BA.2	BA.2	0	0.06	1	68	72.3404	1.06383
hCoV-19/England/QEUH-3E5025F/2022	MT|BA.2|EPI_ISL_13359356|2022-06-10|England	MT	EPI_ISL_13359356	England	2022-06-10	BA.2	BA.2	BA.2	0	0.06	0	62	65.9574	0
hCoV-19/USA/NJ-PHEL-V22025996/2022	MT|BA.2|EPI_ISL_13391951|2022-05-17|USA	MT	EPI_ISL_13391951	USA	2022-05-17	BA.2	BA.2	BA.2	0	0.06	0	57	60.6383	0
hCoV-19/India/MH-GMCA-ICMR-INSACOG-C626060/2022	MT|BA.2|EPI_ISL_13502528|2022-06-18|India	MT	EPI_ISL_13502528	India	2022-06-18	BA.2	BA.2	BA.2	0	0.06	2	53	56.383	2.12766
hCoV-19/Australia/NSW-ICPMR-27989/2022	MT|BA.2|EPI_ISL_13539746|2022-06-19|Australia	MT	EPI_ISL_13539746	Australia	2022-06-19	BA.2	BA.2	BA.2	0	0.06	1	61	64.8936	1.06383
hCoV-19/Russia/SPE-RII-MH70530S/2022	MT|BA.2|EPI_ISL_13638508|2022-06-28|Russia	MT	EPI_ISL_13638508	Russia	2022-06-28	BA.2	BA.2	BA.2	0	0.06	1	54	57.4468	1.06383
hCoV-19/Jamaica/JAM-UWIMicro-1427/2022	MT|BA.2|EPI_ISL_13821686|2022-04-27|Jamaica	MT	EPI_ISL_13821686	Jamaica	2022-04-27	BA.2	BA.2	BA.2	0	0.06	0	58	61.7021	0
hCoV-19/Canada/SK-RRPL-465236/2022	MT|BA.2|EPI_ISL_13855534|2022-06-24|Canada	MT	EPI_ISL_13855534	Canada	2022-06-24	BA.2	BA.2	BA.2	0	0.06	0	55	58.5106	0
hCoV-19/Germany/BY-RKI-I-884295/2022	MT|BA.2|EPI_ISL_13914321|2022-05-20|Germany	MT	EPI_ISL_13914321	Germany	2022-05-20	BA.2	BA.2	BA.2	0	0.06	0	41	43.617	0
hCoV-19/India/MH_BJCOG_INSACOG_3674/2022	MT|BA.2|EPI_ISL_13981314|2022-07-09|India	MT	EPI_ISL_13981314	India	2022-07-09	BA.2	BA.2	BA.2	0	0.06	0	54	57.4468	0
hCoV-19/India/PB-VRDLGMCPTA-ICMR-INSACOG-GS0000196/2022	MT|BA.2|EPI_ISL_14410212|2022-06-04|India	MT	EPI_ISL_14410212	India	2022-06-04	BA.2	BA.2	BA.2	0.5	0.06	0	45	47.8723	0
hCoV-19/Russia/LIP-CRIE-7757101377/2022	MT|BA.2|EPI_ISL_14424696|2022-06-15|Russia	MT	EPI_ISL_14424696	Russia	2022-06-15	BA.2	BA.2	BA.2	0.333333	0.06	1	57	60.6383	1.06383
hCoV-19/Brazil/SP-BT-343/2022	MT|BA.2|EPI_ISL_14435565|2022-06-14|Brazil	MT	EPI_ISL_14435565	Brazil	2022-06-14	BA.2	BA.2	BA.2	0.5	0.06	1	65	69.1489	1.06383
hCoV-19/India/KA-RFNB-16456/2022	MT|BA.2|EPI_ISL_14586909|2022-08|India	MT	EPI_ISL_14586909	India	2022-08	BA.2	BA.2	BA.2	0	0.06	4	52	55.3191	4.25532
hCoV-19/India/MH-INSACOG-CSIR-NEERI2613/2022	MT|BA.2|EPI_ISL_14910740|2022-08-01|India	MT	EPI_ISL_14910740	India	2022-08-01	BA.2.75	BA.2	BA.2.75	0.5	0.06	4	44	46.8085	4.25532
hCoV-19/India/GJ-INSACOG-GBRC8414/2022	MT|BA.2|EPI_ISL_15057987|2022-08-04|India	MT	EPI_ISL_15057987	India	2022-08-04	BA.2	BA.2	BA.2	0	0.06	2	45	47.8723	2.12766
hCoV-19/India/GJ-INSACOG-GBRC8425/2022	MT|BA.2|EPI_ISL_15057998|2022-08-05|India	MT	EPI_ISL_15057998	India	2022-08-05	BA.2	BA.2	BA.2	0	0.06	3	49	52.1277	3.19149
hCoV-19/India/GJ-INSACOG-GBRC8428/2022	MT|BA.2|EPI_ISL_15058001|2022-08-03|India	MT	EPI_ISL_15058001	India	2022-08-03	BA.2	BA.2	BA.2	0	0.06	1	48	51.0638	1.06383
hCoV-19/India/KA-18303/2022	MT|BA.2|EPI_ISL_15294708|2022-07-12|India	MT	EPI_ISL_15294708	India	2022-07-12	BA.2.75	BA.2	BA.2.75	0.5	0.06	3	48	51.0638	3.19149
hCoV-19/India/AS-NEIST-INSACOG-R38-CID2095/2022	MT|BA.2|EPI_ISL_15332216|2022-08-04|India	MT	EPI_ISL_15332216	India	2022-08-04	BA.2	BA.2	BA.2	0	0.06	4	60	63.8298	4.25532
hCoV-19/USA/CA-SEARCH-99343/2022	MT|BA.2|EPI_ISL_15378834|2022-07-17|USA	MT	EPI_ISL_15378834	USA	2022-07-17	BA.2	BA.2	BA.2	0	0.06	2	67	71.2766	2.12766
hCoV-19/India/OR-ILSGS19576/2022	MT|BA.2|EPI_ISL_15422875|2022-07-22|India	MT	EPI_ISL_15422875	India	2022-07-22	BA.2	BA.2	BA.2	0	0.06	2	57	60.6383	2.12766
hCoV-19/Indonesia/SU-MFMUSU-WGS-22-0112-VA/2022	MT|BA.2|EPI_ISL_15694620|2022-09-23|Indonesia	MT	EPI_ISL_15694620	Indonesia	2022-09-23	BA.2	BA.2	BA.2	0	0.06	2	53	56.383	2.12766
hCoV-19/India/GJ-INSACOG-GBRC9456/2022	MT|BA.2|EPI_ISL_15743116|2022-10-07|India	MT	EPI_ISL_15743116	India	2022-10-07	BA.2	BA.2	BA.2	0	0.06	3	45	47.8723	3.19149
hCoV-19/India/DL-NII-1437/2022	MT|BA.2|EPI_ISL_15757306|2022-08-08|India	MT	EPI_ISL_15757306	India	2022-08-08	BA.2	BA.2	BA.2	0.75	0.06	4	38	40.4255	4.25532
hCoV-19/Thailand/TUC-L22-61492/2022	MT|BA.2|EPI_ISL_16030247|2022-11-04|Thailand	MT	EPI_ISL_16030247	Thailand	2022-11-04	BA.2	BA.2	BA.2	0	0.06	4	61	64.8936	4.25532
hCoV-19/Malaysia/HPUPM_NGS0634/2022	MT|BA.2|EPI_ISL_16046986|2022-10-27|Malaysia	MT	EPI_ISL_16046986	Malaysia	2022-10-27	BA.2	BA.2	BA.2	0	0.06	3	60	63.8298	3.19149
hCoV-19/India/TN-CDFD-N-260/2022	MT|BA.2|EPI_ISL_16159409|2022-11-20|India	MT	EPI_ISL_16159409	India	2022-11-20	BA.2	BA.2	BA.2	0	0.06	3	58	61.7021	3.19149
hCoV-19/Egypt/CPHL-EGY22627/2022	MT|BA.2|EPI_ISL_16299739|2022-08-22|Egypt	MT	EPI_ISL_16299739	Egypt	2022-08-22	BA.2	BA.2.65 (consensus call)	BA.2	0	0.06	0	60	63.8298	0
hCoV-19/Australia/ACT9488/2022	MT|BA.2|EPI_ISL_16394922|2022-11-16|Australia	MT	EPI_ISL_16394922	Australia	2022-11-16	BA.2	BA.2	BA.2	0	0.06	1	68	72.3404	1.06383
hCoV-19/Germany/BY-RKI-I-1074344/2022	MT|BA.2|EPI_ISL_16396200|2022-12-17|Germany	MT	EPI_ISL_16396200	Germany	2022-12-17	BA.2	BA.2	BA.2	0	0.06	2	37	39.3617	2.12766
hCoV-19/USA/IL-S22WGS6791/2022	MT|BA.2|EPI_ISL_16431012|2022-12-18|USA	MT	EPI_ISL_16431012	USA	2022-12-18	BA.2	BA.2	BA.2	0	0.06	6	56	59.5745	6.38298
hCoV-19/Georgia/Tb-s6204/2022	MT|BA.2|EPI_ISL_16601381|2022-06-02|Georgia	MT	EPI_ISL_16601381	Georgia	2022-06-02	BA.2	BA.2	BA.2	0	0.06	0	52	55.3191	0
hCoV-19/Italy/SIC-CQRC-3423000972/2023	MT|BA.2|EPI_ISL_16611960|2023-01-10|Italy	MT	EPI_ISL_16611960	Italy	2023-01-10	BA.2	BA.2	BA.2	0.666667	0.06	2	59	62.766	2.12766
hCoV-19/Germany/BY-RKI-I-1107438/2023	MT|BA.2|EPI_ISL_17003534|2023-02-13|Germany	MT	EPI_ISL_17003534	Germany	2023-02-13	BA.2	BA.2	BA.2	0	0.06	2	42	44.6809	2.12766
hCoV-19/Malaysia/HPUPM_NGS0941/2023	MT|BA.2|EPI_ISL_17037261|2023-01-07|Malaysia	MT	EPI_ISL_17037261	Malaysia	2023-01-07	BA.2	BA.2	BA.2	0	0.06	3	59	62.766	3.19149
hCoV-19/USA/IL-SHIELD-3032023186/2023	MT|BA.2|EPI_ISL_17183440|2023-02-22|USA	MT	EPI_ISL_17183440	USA	2023-02-22	BA.2	BA.2	BA.2	0	0.06	3	55	58.5106	3.19149
hCoV-19/Germany/BY-RKI-I-1122147/2023	BG|BA.2.75|EPI_ISL_17256256|2023-03-06|Germany	BG	EPI_ISL_17256256	Germany	2023-03-06	BA.2.75	BA.2.75	BA.2.75	0	0.06	1	43	45.7447	1.06383
hCoV-19/Belgium/Jessa_11-2312-001058ZOL/2023	BG|BA.2.75|EPI_ISL_17276506|2023-03-20|Belgium	BG	EPI_ISL_17276506	Belgium	2023-03-20	BA.2.75	BA.2.75	BA.2.75	0	0.06	1	51	54.2553	1.06383
hCoV-19/Spain/CL-41359/2023	MT|BA.2|EPI_ISL_17521622|2023-03-31|Spain	MT	EPI_ISL_17521622	Spain	2023-03-31	BA.2	BA.2	BA.2	0	0.06	3	56	59.5745	3.19149
hCoV-19/India/JK-44900/2023	BG|BA.2.75|EPI_ISL_17554880|2023-03-25|India	BG	EPI_ISL_17554880	India	2023-03-25	BA.2.75	BA.2.75	BA.2.75	0	0.06	2	61	64.8936	2.12766
hCoV-19/India/DL-AIIMS-COVGE35889/2023	BG|BA.2.75|EPI_ISL_17591366|2023-04-03|India	BG	EPI_ISL_17591366	India	2023-04-03	BA.2.75	BA.2.75	BA.2.75	0.5	0.06	1	54	57.4468	1.06383
hCoV-19/France/PDL-CHUN-231042625/2023	BG|BA.2|EPI_ISL_17626289|2023-04-14|France	BG	EPI_ISL_17626289	France	2023-04-14	BA.2	BA.2	BA.2	0.2	0.06	0	72	76.5957	0
hCoV-19/Spain/MD-HRYC-12731573/2023	BG|BA.2.1|EPI_ISL_17630096|2023-04-25|Spain	BG	EPI_ISL_17630096	Spain	2023-04-25	BA.2	BA.2.1	BA.2	0.333333	0.06	0	84	89.3617	0
hCoV-19/South Korea/KDCA236284/2023	BG|BA.2.75|EPI_ISL_17691534|2023-04-30|South_Korea	BG	EPI_ISL_17691534	South_Korea	2023-04-30	BA.2	BA.2.75	BA.2	0	0.06	5	55	58.5106	5.31915
hCoV-19/Malaysia/MGVI_GU0978/2023	MT|BA.2|EPI_ISL_17722379|2023-04-10|Malaysia	MT	EPI_ISL_17722379	Malaysia	2023-04-10	BA.2	BA.2	BA.2	0	0.06	3	56	59.5745	3.19149
hCoV-19/Indonesia/JK-NIHRD-W02649/2023	MT|BA.2|EPI_ISL_17797250|2023-05-10|Indonesia	MT	EPI_ISL_17797250	Indonesia	2023-05-10	BA.2	BA.2	BA.2	0	0.06	3	58	61.7021	3.19149
hCoV-19/Thailand/NIC_CBI_5655/2023	BG|BA.2|EPI_ISL_17816174|2023-06-01|Thailand	BG	EPI_ISL_17816174	Thailand	2023-06-01	BA.2	BA.2	BA.2	0	0.06	0	61	64.8936	0
hCoV-19/Thailand/NIC_BKK_6149/2023	BG|BA.2|EPI_ISL_17851276|2023-06-11|Thailand	BG	EPI_ISL_17851276	Thailand	2023-06-11	BA.2	BA.2	BA.2	0	0.06	0	59	62.766	0
hCoV-19/USA/CA-GBW-H10-015-6233/2023	BG|XBB.1.5|EPI_ISL_17985432|2023-07-05|USA	BG	EPI_ISL_17985432	USA	2023-07-05	XBB.1.5	XBB.1.5	XBB.1.5	0.666667	0.06	5	74	78.7234	5.31915
hCoV-19/USA/VA-GBW-H10-014-2078/2023	BG|XBB.1.5|EPI_ISL_17985454|2023-07-04|USA	BG	EPI_ISL_17985454	USA	2023-07-04	Others	XBB.1.5	XBB.1.5	0.75	0.06	5	76	80.8511	5.31915
hCoV-19/Australia/SA543852/2023	BG|BA.2|EPI_ISL_18000155|2023-06-22|Australia	BG	EPI_ISL_18000155	Australia	2023-06-22	XBB.1.5	BA.2	BA.2	0.5	0.06	0	77	81.9149	0
hCoV-19/France/ARA-HCL023110284801/2023	BG|XBB.1.5|EPI_ISL_18010089|2023-07-03|France	BG	EPI_ISL_18010089	France	2023-07-03	XBB.1.5	XBB.1.5	XBB.1.5	0	0.06	5	76	80.8511	5.31915
hCoV-19/Scotland/CLIMB-CM7YETSR/2023	BG|XBB.1.5.89|EPI_ISL_18010708|2023-07-05|United_Kingdom	BG	EPI_ISL_18010708	United_Kingdom	2023-07-05	Others	XBB.1.5.89	XBB.1.5.89	0	0.06	4	69	73.4043	4.25532
hCoV-19/Italy/EMR_BO_2842/2023	BG|XBB.1.5|EPI_ISL_18015523|2023-07-19|Italy	BG	EPI_ISL_18015523	Italy	2023-07-19	XBB.1.5	XBB.1.5	XBB.1.5	0.5	0.06	3	71	75.5319	3.19149
hCoV-19/Netherlands/NH-RIVM-130555/2023	BG|XBB.1.33|EPI_ISL_18032333|2023-07-01|Netherlands	BG	EPI_ISL_18032333	Netherlands	2023-07-01	XBB.1.5	XBB.1.33	XBB.1.33	0	0.06	4	72	76.5957	4.25532
hCoV-19/Germany/BY-RKI-I-1136933/2023	BG|XBB.1.5|EPI_ISL_18050007|2023-07-10|Germany	BG	EPI_ISL_18050007	Germany	2023-07-10	XBB.1.5	XBB.1.5	XBB.1.5	0	0.06	5	74	78.7234	5.31915
hCoV-19/USA/IA-SHL-2310642/2023	BG|XBB.1.5.72|EPI_ISL_18060993|2023-07-14|USA	BG	EPI_ISL_18060993	USA	2023-07-14	XBB.1.5	XBB.1.5.72	XBB.1.5.72	0	0.06	5	76	80.8511	5.31915
hCoV-19/Israel/SMC-7114413/2023	BG|XBB.1.5|EPI_ISL_18062641|2023-07-25|Israel	BG	EPI_ISL_18062641	Israel	2023-07-25	XBB.1.5	XBB.1.5	XBB.1.5	0.5	0.06	5	77	81.9149	5.31915
hCoV-19/Israel/SMC-7114414/2023	BG|XBB.1.5|EPI_ISL_18062642|2023-07-26|Israel	BG	EPI_ISL_18062642	Israel	2023-07-26	XBB.1.5	XBB.1.5	XBB.1.5	0.5	0.06	5	76	80.8511	5.31915
hCoV-19/Italy/EMR-BO_2857/2023	BG|XBB.1.33|EPI_ISL_18063192|2023-07-25|Italy	BG	EPI_ISL_18063192	Italy	2023-07-25	XBB.1.5	XBB.1.33	XBB.1.33	0	0.06	3	68	72.3404	3.19149
hCoV-19/Australia/QLD0x013623/2023	BG|XBB.1.5.97|EPI_ISL_18067974|2023-07-12|Australia	BG	EPI_ISL_18067974	Australia	2023-07-12	XBB.1.5	XBB.1.5.97	XBB.1.5.97	0	0.06	3	68	72.3404	3.19149
hCoV-19/Colombia/TOL-INS-VG-30189/2023	BG|XBB.1.5.72|EPI_ISL_18076904|2023-07-06|Colombia	BG	EPI_ISL_18076904	Colombia	2023-07-06	XBB.1.5	XBB.1.5.72	XBB.1.5.72	0	0.06	5	73	77.6596	5.31915
hCoV-19/Brazil/MT-LACENMT-510512972/2023	BG|JD.1.2|EPI_ISL_18079143|2023-07-03|Brazil	BG	EPI_ISL_18079143	Brazil	2023-07-03	Others	JD.1.2	JD.1.2	0	0.06	2	63	67.0213	2.12766
hCoV-19/USA/CA-CDPH-500119158/2023	BG|XBB.1.5.72|EPI_ISL_18080646|2023-07-12|USA	BG	EPI_ISL_18080646	USA	2023-07-12	XBB.1.5	XBB.1.5.72	XBB.1.5.72	0	0.06	5	66	70.2128	5.31915
hCoV-19/USA/CA-CDPH-500118782/2023	BG|XBB.1.5|EPI_ISL_18080960|2023-07-03|USA	BG	EPI_ISL_18080960	USA	2023-07-03	XBB.1.5	XBB.1.5	XBB.1.5	0.333333	0.06	5	65	69.1489	5.31915
hCoV-19/USA/CA-CDPH-500118831/2023	BG|XBB.1.5|EPI_ISL_18080973|2023-07-02|USA	BG	EPI_ISL_18080973	USA	2023-07-02	XBB.1.5	XBB.1.5	XBB.1.5	0	0.06	5	65	69.1489	5.31915
hCoV-19/USA/CA-CDPH-500118949/2023	BG|XBB.1.5.92|EPI_ISL_18081014|2023-07-06|USA	BG	EPI_ISL_18081014	USA	2023-07-06	XBB.1.5	XBB.1.5.92	XBB.1.5	0.5	0.06	5	72	76.5957	5.31915
hCoV-19/USA/CO-CDPHE-41123789/2023	BG|XBB.1.5|EPI_ISL_18093317|2023-07-11|USA	BG	EPI_ISL_18093317	USA	2023-07-11	Others	XBB.1.5	XBB.1.5	0	0.06	5	77	81.9149	5.31915
hCoV-19/Guatemala/2060-DLNS/2023	BG|XBB.1.5.106|EPI_ISL_18099432|2023-07-23|Guatemala	BG	EPI_ISL_18099432	Guatemala	2023-07-23	XBB.1.5	XBB.1.5.106	XBB.1.5.106	0	0.06	1	57	60.6383	1.06383
hCoV-19/Guatemala/2050-DLNS/2023	BG|XBB.1.5.106|EPI_ISL_18099434|2023-07-20|Guatemala	BG	EPI_ISL_18099434	Guatemala	2023-07-20	XBB.1.5	XBB.1.5.106	XBB.1.5.106	0	0.06	1	58	61.7021	1.06383
hCoV-19/USA/AZ-ASPHL-2120/2023	BG|XBB.1.5|EPI_ISL_18103801|2023-08-03|USA	BG	EPI_ISL_18103801	USA	2023-08-03	XBB.1.5	XBB.1.5	XBB.1.5	0	0.06	5	68	72.3404	5.31915
hCoV-19/Puerto Rico/PR-CVL-019173/2023	BG|XBB.1.5|EPI_ISL_18107224|2023-07-17|Puerto_Rico	BG	EPI_ISL_18107224	Puerto_Rico	2023-07-17	Others	XBB.1.5 (consensus call)	XBB.1	0.333333	0.06	5	70	74.4681	5.31915
hCoV-19/Puerto Rico/PR-CVL-019180/2023	BG|XBB.1.5.72|EPI_ISL_18107231|2023-07-19|Puerto_Rico	BG	EPI_ISL_18107231	Puerto_Rico	2023-07-19	XBB	XBB.1.5.72	XBB.1.5.72	0	0.06	5	76	80.8511	5.31915
hCoV-19/USA/TX-TAMGHRC-SHS_97581/2023	BG|XBB.1.5|EPI_ISL_18111434|2023-07-17|USA	BG	EPI_ISL_18111434	USA	2023-07-17	XBB.1.5	XBB.1.5	XBB.1.5	0	0.06	3	51	54.2553	3.19149
hCoV-19/Spain/AS-HUCA-232345101/2023	MT|BA.2|EPI_ISL_18112393|2023-07-19|Spain	MT	EPI_ISL_18112393	Spain	2023-07-19	XBB.1.5	BA.2	BA.2	0.0833333	0.06	2	60	63.8298	2.12766
hCoV-19/USA/CA-CCPHL-5234/2023	BG|XBB.1.5|EPI_ISL_18114374|2023-07-24|USA	BG	EPI_ISL_18114374	USA	2023-07-24	XBB.1.5	XBB.1.5	XBB.1.5	0	0.06	5	70	74.4681	5.31915
hCoV-19/England/CLIMB-CM7YJ4AQ/2023	FG|BA.2.86.1|EPI_ISL_18227079|2023-08-26|United_Kingdom	FG	EPI_ISL_18227079	United_Kingdom	2023-08-26	BA.2.86*	BA.2.86.1	BA.2.86.1	0	0.06	25	81	86.1702	26.5957
hCoV-19/South Africa/NICD-R09629/2023	FG|BA.2.86|EPI_ISL_18234517|2023-08-22|South_Africa	FG	EPI_ISL_18234517	South_Africa	2023-08-22	BA.2.86*	BA.2.86	BA.2.86	0.5	0.06	24	82	87.234	25.5319
hCoV-19/South Africa/NHLS_NCV1886/2023	FG|BA.2.86|EPI_ISL_18241800|2023-08-15|South_Africa	FG	EPI_ISL_18241800	South_Africa	2023-08-15	BA.2	BA.2.86	BA.2	0	0.06	16	67	71.2766	17.0213
hCoV-19/USA/CA-SEARCH-226175/2023	MT|BA.2|EPI_ISL_18289393|2023-03-14|USA	MT	EPI_ISL_18289393	USA	2023-03-14	BA.2	BA.2	BA.2	0	0.06	4	48	51.0638	4.25532
hCoV-19/Spain/GA-SCQ_23-255309/2023	FG|BA.2.86|EPI_ISL_18400450|2023-09-15|Spain	FG	EPI_ISL_18400450	Spain	2023-09-15	BA.2.86*	BA.2.86	BA.2	0	0.06	21	90	95.7447	22.3404
hCoV-19/USA/NY-WMC-5778/2023	MT|BA.2|EPI_ISL_18503348|2023-01-09|USA	MT	EPI_ISL_18503348	USA	2023-01-09	BA.2.86*	BA.2	BA.2	0.5	0.06	2	61	64.8936	2.12766
hCoV-19/Germany/BY-MVP-000022272/2023	MT|BA.2|EPI_ISL_18525786|2023-10-26|Germany	MT	EPI_ISL_18525786	Germany	2023-10-26	JN.1*	BA.2	BA.2	0	0.06	9	64	68.0851	9.57447
hCoV-19/Luxembourg/LNS7319859/2023	FG|BA.2.86.1|EPI_ISL_18531225|2023-10-21|Luxembourg	FG	EPI_ISL_18531225	Luxembourg	2023-10-21	JN.1*	BA.2.86.1	BA.2.86.1	0	0.06	17	67	71.2766	18.0851
hCoV-19/USA/NJ-GBW-H10-018-0300/2023	MT|BA.2|EPI_ISL_18553779|2023-11-17|USA	MT	EPI_ISL_18553779	USA	2023-11-17	Others	BA.2	BA.2	0	0.06	12	85	90.4255	12.766
hCoV-19/Netherlands/NB-MVD-2300705/2023	FG|JN.1.1|EPI_ISL_18591878|2023-11-24|Netherlands	FG	EPI_ISL_18591878	Netherlands	2023-11-24	BA.2.86*	JN.1.1	JN.1.1	0	0.06	21	87	92.5532	22.3404
hCoV-19/Austria/AGES-1143061/2023	FG|JN.1|EPI_ISL_18596825|2023-11-24|Austria	FG	EPI_ISL_18596825	Austria	2023-11-24	JN.1*	JN.1.37	JN.1	0	0.06	21	81	86.1702	22.3404
hCoV-19/Austria/AGES-AZ-1669484/2023	FG|BA.2.86.1|EPI_ISL_18596930|2023-11-27|Austria	FG	EPI_ISL_18596930	Austria	2023-11-27	BA.2.86*	BA.2.86.1	BA.2.86.1	0	0.06	21	81	86.1702	22.3404
hCoV-19/USA/IL-C23WGS3622/2023	MT|BA.2|EPI_ISL_18709696|2023-12-11|USA	MT	EPI_ISL_18709696	USA	2023-12-11	BA.2	BA.2	BA.2	0	0.06	15	71	75.5319	15.9574
hCoV-19/India/MH_BJCOG_INSACOG_6103/2023	MT|BA.2|EPI_ISL_18718956|2023-12-23|India	MT	EPI_ISL_18718956	India	2023-12-23	JN.1*	BA.2	BA.2	0	0.06	17	78	82.9787	18.0851
hCoV-19/Italy/LOM_Niguarda_45106486AMEN/2023	MT|BA.2|EPI_ISL_18722009|2023-12-20|Italy	MT	EPI_ISL_18722009	Italy	2023-12-20	BA.2	BA.2	BA.2	0	0.06	11	73	77.6596	11.7021
hCoV-19/Indonesia/JB-GS-FKUNPAD-0550/2022	MT|BA.2|EPI_ISL_18734528|2022-08-26|Indonesia	MT	EPI_ISL_18734528	Indonesia	2022-08-26	BA.2	BA.2	BA.2	0	0.06	2	61	64.8936	2.12766
hCoV-19/USA/TX-HMH-M-136804/2023	MT|BA.2|EPI_ISL_18743159|2023-12-28|USA	MT	EPI_ISL_18743159	USA	2023-12-28	BA.2	BA.2	BA.2	0.666667	0.06	13	73	77.6596	13.8298
hCoV-19/USA/TX-HMH-M-136572/2023	MT|BA.2|EPI_ISL_18743458|2023-12-18|USA	MT	EPI_ISL_18743458	USA	2023-12-18	BA.2	BA.2	BA.2.86.1	0	0.06	19	80	85.1064	20.2128
hCoV-19/USA/TX-HMH-M-136492/2023	MT|BA.2|EPI_ISL_18743501|2023-12-18|USA	MT	EPI_ISL_18743501	USA	2023-12-18	BA.2	BA.2	BA.2	0	0.06	20	78	82.9787	21.2766
hCoV-19/USA/TX-HMH-M-136667/2023	MT|BA.2|EPI_ISL_18743744|2023-12-21|USA	MT	EPI_ISL_18743744	USA	2023-12-21	BA.2	BA.2	BA.2	0	0.06	12	89	94.6809	12.766
hCoV-19/Lithuania/MB231211_0086/2023	MT|BA.2|EPI_ISL_18793553|2023-12-06|Lithuania	MT	EPI_ISL_18793553	Lithuania	2023-12-06	BA.2	BA.2	BA.2	0	0.06	9	52	55.3191	9.57447
hCoV-19/USA/CA-HLX-STM-XGRMSXJDV/2023	MT|BA.2|EPI_ISL_18818328|2023-12-21|USA	MT	EPI_ISL_18818328	USA	2023-12-21	BA.2	BA.2	BA.2	0	0.06	4	49	52.1277	4.25532
hCoV-19/India/MH-Pune-INSACOG_RF_WT-NCL-4977/2022	MT|BA.2|EPI_ISL_18819949|2022-08-12|India	MT	EPI_ISL_18819949	India	2022-08-12	BA.2.75	BA.2	BA.2	0	0.06	1	58	61.7021	1.06383
hCoV-19/Italy/LOM_Niguarda_53046638BER/2024	MT|BA.2|EPI_ISL_18820154|2024-01-15|Italy	MT	EPI_ISL_18820154	Italy	2024-01-15	BA.2	BA.2	BA.2	0	0.06	9	66	70.2128	9.57447
hCoV-19/France/CVL-ChuTo-9800123162/2023	FG|JN.1|EPI_ISL_18831617|2023-01-03|France	FG	EPI_ISL_18831617	France	2023-01-03	Others	JN.1.30	JN.1	0.5	0.06	17	75	79.7872	18.0851
hCoV-19/USA/IL-C24WGS250/2024	MT|BA.2|EPI_ISL_18872632|2024-01-23|USA	MT	EPI_ISL_18872632	USA	2024-01-23	BA.2	BA.2	BA.2	0	0.06	19	76	80.8511	20.2128
hCoV-19/Spain/CL-COV46283/2024	MT|BA.2|EPI_ISL_18878699|2024-01-04|Spain	MT	EPI_ISL_18878699	Spain	2024-01-04	JN.1*	BA.2	XDD	0	0.06	18	41	43.617	19.1489
hCoV-19/USA/CA-SFDPH-M7984/2024	FG|JN.1|EPI_ISL_18955125|2021-01-01|USA	FG	EPI_ISL_18955125	USA	2024-01-01	JN.1*	JN.1	JN.1.15	0	0.06	29	91	96.8085	30.8511
hCoV-19/USA/CA-SFDPH-M7984/2024	FG|JN.1|EPI_ISL_18955125|2021-01-01|USA	FG	EPI_ISL_18955125	USA	2024-01-01	JN.1	JN.1	JN.1.15	0	0.06	29	91	96.8085	30.8511
hCoV-19/India/MH-KasturbaMCGM-ICMR-INSACOG-WG2534/2022	MT|BA.2|EPI_ISL_9512374|2022-01-09|India	MT	EPI_ISL_9512374	India	2022-01-09	BA.2	BA.2	BA.2	0	0.06	0	50	53.1915	0
hCoV-19/India/MH-KasturbaMCGM-ICMR-INSACOG-WG2534/2022	MT|BA.2|EPI_ISL_9512374|2022-01-09|India	MT	EPI_ISL_9512374	India	2022-01-09	BA.2	BA.2	BA.2	0	0.06	0	50	53.1915	0
hCoV-19/India/WB-INSACOG-1932000391108/2022	MT|BA.2|EPI_ISL_9720915|2022-01-06|India	MT	EPI_ISL_9720915	India	2022-01-06	BA.2	BA.2	BA.2	0.5	0.06	0	58	61.7021	0
hCoV-19/India/WB-INSACOG-1932000391108/2022	MT|BA.2|EPI_ISL_9720915|2022-01-06|India	MT	EPI_ISL_9720915	India	2022-01-06	BA.2	BA.2	BA.2	0.5	0.06	0	58	61.7021	0
hCoV-19/Denmark/DCGC-372267/2022	MT|BA.2|EPI_ISL_10063918|2022-02-11|Denmark	MT	EPI_ISL_10063918	Denmark	2022-02-11	BA.2	BA.2	BA.2	0	0.05	0	55	57.8947	0
hCoV-19/Canada/BC-BCCDC-347261/2022	MT|BA.2|EPI_ISL_10235999|2022-01-16|Canada	MT	EPI_ISL_10235999	Canada	2022-01-16	BA.2	BA.2	BA.2	0	0.05	0	58	61.0526	0
hCoV-19/Germany/NW-RKI-I-548337/2022	MT|BA.2|EPI_ISL_10290030|2022-02-08|Germany	MT	EPI_ISL_10290030	Germany	2022-02-08	BA.2	BA.2	BA.2	0	0.05	0	60	63.1579	0
hCoV-19/Germany/NW-RKI-I-548375/2022	MT|BA.2|EPI_ISL_10290068|2022-02-08|Germany	MT	EPI_ISL_10290068	Germany	2022-02-08	BA.2	BA.2	BA.2	0	0.05	0	59	62.1053	0
hCoV-19/Canada/AB-ABPHL-53644/2022	MT|BA.2|EPI_ISL_10321737|2022-01-31|Canada	MT	EPI_ISL_10321737	Canada	2022-01-31	BA.2	BA.2	BA.2	0	0.05	0	57	60	0
hCoV-19/Canada/AB-ABPHL-53654/2022	MT|BA.2|EPI_ISL_10321747|2022-01-31|Canada	MT	EPI_ISL_10321747	Canada	2022-01-31	BA.2	BA.2	BA.2	0	0.05	0	57	60	0
hCoV-19/England/MILK-370F827/2022	MT|BA.2|EPI_ISL_10473885|2022-02-15|England	MT	EPI_ISL_10473885	England	2022-02-15	BA.2	BA.2	BA.2	0	0.05	1	56	58.9474	1.05263
hCoV-19/England/DHSC-CYN3PJY/2022	MT|BA.2|EPI_ISL_10628274|2022-02-17|England	MT	EPI_ISL_10628274	England	2022-02-17	BA.2	BA.2	BA.2	0	0.05	1	54	56.8421	1.05263
hCoV-19/Switzerland/ZH-ETHZ-36437374/2022	MT|BA.2|EPI_ISL_10706750|2022-02-20|Switzerland	MT	EPI_ISL_10706750	Switzerland	2022-02-20	BA.2	BA.2	BA.2	0.333333	0.05	0	54	56.8421	0
hCoV-19/Netherlands/NH-AUMC-004164/2022	MT|BA.2|EPI_ISL_10925480|2022-02-22|Netherlands	MT	EPI_ISL_10925480	Netherlands	2022-02-22	BA.2	BA.2	BA.2	0	0.05	1	58	61.0526	1.05263
hCoV-19/England/PHEP-YYRM9R9/2022	MT|BA.2|EPI_ISL_11059886|2022-02-28|England	MT	EPI_ISL_11059886	England	2022-02-28	BA.2	BA.2	BA.2	0.333333	0.05	0	81	85.2632	0
hCoV-19/England/MILK-3A0780E/2022	MT|BA.2|EPI_ISL_11076076|2022-03-09|England	MT	EPI_ISL_11076076	England	2022-03-09	BA.2	BA.2	BA.2	0.333333	0.05	0	76	80	0
hCoV-19/South Africa/NHLS-UCT-GS-BD12/2022	MT|BA.2|EPI_ISL_11111435|2022-02-15|South_Africa	MT	EPI_ISL_11111435	South_Africa	2022-02-15	BA.2	BA.2	BA.2	0	0.05	0	53	55.7895	0
hCoV-19/England/LSPA-3A38AB3/2022	MT|BA.2|EPI_ISL_11120942|2022-03-10|England	MT	EPI_ISL_11120942	England	2022-03-10	BA.2	BA.2	BA.2	0	0.05	0	60	63.1579	0
hCoV-19/England/BRBR-3AB6A62/2022	MT|BA.2|EPI_ISL_11212767|2022-03-14|England	MT	EPI_ISL_11212767	England	2022-03-14	BA.2	BA.2	BA.2	0	0.05	0	58	61.0526	0
hCoV-19/Canada/BC-BCCDC-366882/2022	MT|BA.2|EPI_ISL_11366206|2022-02-14|Canada	MT	EPI_ISL_11366206	Canada	2022-02-14	BA.2	BA.2	BA.2	0	0.05	0	58	61.0526	0
hCoV-19/England/LSPA-3B50B48/2022	MT|BA.2|EPI_ISL_11394512|2022-03-17|England	MT	EPI_ISL_11394512	England	2022-03-17	BA.2	BA.2	BA.2	0.333333	0.05	0	80	84.2105	0
hCoV-19/England/PHEC-YYDQHJU/2022	MT|BA.2|EPI_ISL_11478635|2022-03-07|England	MT	EPI_ISL_11478635	England	2022-03-07	BA.2	BA.2	BA.2	0	0.05	1	56	58.9474	1.05263
hCoV-19/England/LSPA-3C0AAB8/2022	MT|BA.2|EPI_ISL_11551299|2022-03-22|England	MT	EPI_ISL_11551299	England	2022-03-22	BA.2	BA.2	BA.2	0	0.05	0	58	61.0526	0
hCoV-19/Scotland/QEUH-3BA9F62/2022	MT|BA.2|EPI_ISL_11555364|2022-03-19|Scotland	MT	EPI_ISL_11555364	Scotland	2022-03-19	BA.2	BA.2	BA.2	0	0.05	0	57	60	0
hCoV-19/Germany/BY-RKI-I-662349/2022	MT|BA.2|EPI_ISL_11618864|2022-03-15|Germany	MT	EPI_ISL_11618864	Germany	2022-03-15	BA.2	BA.2	BA.2	0	0.05	0	56	58.9474	0
hCoV-19/England/LSPA-3CAFA88/2022	MT|BA.2|EPI_ISL_11698512|2022-03-26|England	MT	EPI_ISL_11698512	England	2022-03-26	BA.2	BA.2	BA.2	0	0.05	0	60	63.1579	0
hCoV-19/Israel/ICH-741205983/2022	MT|BA.2|EPI_ISL_11844992|2022-03-15|Israel	MT	EPI_ISL_11844992	Israel	2022-03-15	BA.2	BA.2	BA.2	0	0.05	0	57	60	0
hCoV-19/Israel/ICH-741206006/2022	MT|BA.2|EPI_ISL_11845067|2022-03-15|Israel	MT	EPI_ISL_11845067	Israel	2022-03-15	BA.2	BA.2	BA.2	0	0.05	0	57	60	0
hCoV-19/Israel/ICH-741207429/2022	MT|BA.2|EPI_ISL_11848201|2022-03-16|Israel	MT	EPI_ISL_11848201	Israel	2022-03-16	BA.2	BA.2	BA.2	0	0.05	0	55	57.8947	0
hCoV-19/Wales/PHWC-PJW9P5/2022	MT|BA.2|EPI_ISL_12031968|2022-03-27|Wales	MT	EPI_ISL_12031968	Wales	2022-03-27	BA.2	BA.2	BA.2	0	0.05	0	57	60	0
hCoV-19/England/LSPA-3D3C0AB/2022	MT|BA.2|EPI_ISL_12066206|2022-04-07|England	MT	EPI_ISL_12066206	England	2022-04-07	BA.2	BA.2	BA.2	0	0.05	0	53	55.7895	0
hCoV-19/Israel/CVL-9002586/2022	MT|BA.2|EPI_ISL_12091962|2022-03-26|Israel	MT	EPI_ISL_12091962	Israel	2022-03-26	BA.2	BA.2	BA.2	0	0.05	1	61	64.2105	1.05263
hCoV-19/England/PHEC-YYRKJ6N/2022	MT|BA.2|EPI_ISL_12104794|2022-03-28|England	MT	EPI_ISL_12104794	England	2022-03-28	BA.2	BA.2	BA.2	0	0.05	0	57	60	0
hCoV-19/France/GES-HMN-22032240412/2022	MT|BA.2|EPI_ISL_12131070|2022-03-21|France	MT	EPI_ISL_12131070	France	2022-03-21	BA.2	BA.2	BA.2	0	0.05	1	53	55.7895	1.05263
hCoV-19/Czech Republic/UMTM475111/2022	MT|BA.2|EPI_ISL_12132684|2022-04-04|Czech_Republic	MT	EPI_ISL_12132684	Czech_Republic	2022-04-04	BA.2	BA.2	BA.2	0	0.05	0	55	57.8947	0
hCoV-19/France/ARA-HCL022062264302/2022	MT|BA.2|EPI_ISL_12208908|2022-04-04|France	MT	EPI_ISL_12208908	France	2022-04-04	BA.2	BA.2	BA.2	0	0.05	1	56	58.9474	1.05263
hCoV-19/Slovakia/BA_22_00023774/2022	MT|BA.2|EPI_ISL_12231951|2022-04-01|Slovakia	MT	EPI_ISL_12231951	Slovakia	2022-04-01	BA.2	BA.2	BA.2	0.333333	0.05	0	51	53.6842	0
hCoV-19/France/ARA-HCL022065543501/2022	MT|BA.2|EPI_ISL_12261973|2022-04-12|France	MT	EPI_ISL_12261973	France	2022-04-12	BA.2	BA.2	BA.2	0	0.05	1	63	66.3158	1.05263
hCoV-19/France/ARA-HMN-22042070969/2022	MT|BA.2|EPI_ISL_12270901|2022-03-28|France	MT	EPI_ISL_12270901	France	2022-03-28	BA.2	BA.2	BA.2	0	0.05	0	52	54.7368	0
hCoV-19/Scotland/QEUH-3D95073/2022	MT|BA.2|EPI_ISL_12282673|2022-04-19|Scotland	MT	EPI_ISL_12282673	Scotland	2022-04-19	BA.2	BA.2	BA.2	0	0.05	0	57	60	0
hCoV-19/Austria/LB-R00071-S340/2022	MT|BA.2|EPI_ISL_12293319|2022-04-20|Austria	MT	EPI_ISL_12293319	Austria	2022-04-20	BA.2	BA.2	BA.2	0	0.05	0	51	53.6842	0
hCoV-19/Australia/NSW-SAVID-11408/2022	MT|BA.2|EPI_ISL_12308996|2022-03-29|Australia	MT	EPI_ISL_12308996	Australia	2022-03-29	BA.2	BA.2	BA.2	0	0.05	1	60	63.1579	1.05263
hCoV-19/Austria/AGES-131649/2022	MT|BA.2|EPI_ISL_12317275|2022-02-28|Austria	MT	EPI_ISL_12317275	Austria	2022-02-28	BA.2	BA.2	BA.2	0	0.05	0	58	61.0526	0
hCoV-19/Malaysia/IMR_CV04353/2022	MT|BA.2|EPI_ISL_12321900|2022-04-11|Malaysia	MT	EPI_ISL_12321900	Malaysia	2022-04-11	BA.2	BA.2	BA.2	0	0.05	1	62	65.2632	1.05263
hCoV-19/England/PHEC-YYR4BDY/2022	MT|BA.2|EPI_ISL_12403610|2022-03-23|England	MT	EPI_ISL_12403610	England	2022-03-23	BA.2	BA.2	BA.2	0.333333	0.05	1	57	60	1.05263
hCoV-19/France/GES-HMN-22042130771/2022	MT|BA.2|EPI_ISL_12421468|2022-04-11|France	MT	EPI_ISL_12421468	France	2022-04-11	BA.2	BA.2	BA.2	0	0.05	1	50	52.6316	1.05263
hCoV-19/France/PDL-HMN-22042111173/2022	MT|BA.2|EPI_ISL_12421888|2022-03-14|France	MT	EPI_ISL_12421888	France	2022-03-14	BA.2	BA.2	BA.2	0.5	0.05	1	54	56.8421	1.05263
hCoV-19/Australia/ACT4981/2022	MT|BA.2|EPI_ISL_12434322|2022-04-07|Australia	MT	EPI_ISL_12434322	Australia	2022-04-07	BA.2	BA.2	BA.2	0	0.05	0	58	61.0526	0
hCoV-19/Luxembourg/LNS1951168/2022	MT|BA.2|EPI_ISL_12440945|2022-02-28|Luxembourg	MT	EPI_ISL_12440945	Luxembourg	2022-02-28	BA.2	BA.2	BA.2	0	0.05	1	49	51.5789	1.05263
hCoV-19/Lithuania/MR-LUHS-42-74/2022	MT|BA.2|EPI_ISL_12475521|2022-04-20|Lithuania	MT	EPI_ISL_12475521	Lithuania	2022-04-20	BA.2	BA.2	BA.2	0	0.05	0	58	61.0526	0
hCoV-19/France/CVL-IPP29216/2022	MT|BA.2|EPI_ISL_12499715|2022-04-11|France	MT	EPI_ISL_12499715	France	2022-04-11	BA.2	BA.2	BA.2	0	0.05	0	60	63.1579	0
hCoV-19/Ireland/G-NVRL-S22IRL00277723/2022	MT|BA.2|EPI_ISL_12534426|2022-03-28|Ireland	MT	EPI_ISL_12534426	Ireland	2022-03-28	BA.2	BA.2	BA.2	0	0.05	0	60	63.1579	0
hCoV-19/England/PHEC-YYR9WYJ/2022	MT|BA.2|EPI_ISL_12560914|2022-04-14|England	MT	EPI_ISL_12560914	England	2022-04-14	BA.2	BA.2	BA.2	0	0.05	0	56	58.9474	0
hCoV-19/France/OCC-GENBIO-U21CV1220104/2022	MT|BA.2|EPI_ISL_12580373|2022-05-02|France	MT	EPI_ISL_12580373	France	2022-05-02	BA.2	BA.2	BA.2	0	0.05	0	66	69.4737	0
hCoV-19/France/OCC-GENBIO-L47GN1221023/2022	MT|BA.2|EPI_ISL_12580408|2022-05-02|France	MT	EPI_ISL_12580408	France	2022-05-02	BA.2	BA.2	BA.2	0	0.05	0	59	62.1053	0
hCoV-19/Ireland/KE-NVRL-S22IRL00287537/2022	MT|BA.2|EPI_ISL_12585284|2022-04-04|Ireland	MT	EPI_ISL_12585284	Ireland	2022-04-04	BA.2	BA.2	BA.2	0.333333	0.05	0	61	64.2105	0
hCoV-19/USA/NJ-PHEL-V22019549/2022	MT|BA.2|EPI_ISL_12611831|2022-04-25|USA	MT	EPI_ISL_12611831	USA	2022-04-25	BA.2	BA.2	BA.2	0	0.05	0	59	62.1053	0
hCoV-19/USA/NJ-PHEL-V22019707/2022	MT|BA.2|EPI_ISL_12611848|2022-04-24|USA	MT	EPI_ISL_12611848	USA	2022-04-24	BA.2	BA.2	BA.2	0	0.05	0	62	65.2632	0
hCoV-19/Germany/BY-RKI-I-788399/2022	MT|BA.2|EPI_ISL_12677516|2022-05-04|Germany	MT	EPI_ISL_12677516	Germany	2022-05-04	BA.2	BA.2	BA.2	0	0.05	0	59	62.1053	0
hCoV-19/Scotland/EDB59611/2022	MT|BA.2|EPI_ISL_12678817|2022-04-18|Scotland	MT	EPI_ISL_12678817	Scotland	2022-04-18	BA.2	BA.2	BA.2	0	0.05	0	53	55.7895	0
hCoV-19/Sweden/Orebro-48046675/2022	MT|BA.2|EPI_ISL_12751761|2022-04-13|Sweden	MT	EPI_ISL_12751761	Sweden	2022-04-13	BA.2	BA.2	BA.2	0	0.05	0	60	63.1579	0
hCoV-19/Australia/NSW-SAVID-11823/2022	MT|BA.2|EPI_ISL_12769901|2022-05-07|Australia	MT	EPI_ISL_12769901	Australia	2022-05-07	BA.2	BA.2	BA.2	0	0.05	1	64	67.3684	1.05263
hCoV-19/England/LSPA-3E124CC/2022	MT|BA.2|EPI_ISL_12772370|2022-05-10|England	MT	EPI_ISL_12772370	England	2022-05-10	BA.2	BA.2	BA.2	0	0.05	1	59	62.1053	1.05263
hCoV-19/France/ARA-GENBIO-14291321338/2022	MT|BA.2|EPI_ISL_12855971|2022-05-12|France	MT	EPI_ISL_12855971	France	2022-05-12	BA.2	BA.2	BA.2	0	0.05	0	58	61.0526	0
hCoV-19/USA/NJ-CDC-LC0626015/2022	MT|BA.2|EPI_ISL_12887014|2022-05-09|USA	MT	EPI_ISL_12887014	USA	2022-05-09	BA.2	BA.2	BA.2	0.333333	0.05	0	55	57.8947	0
hCoV-19/Israel/ICH-741225167/2022	MT|BA.2|EPI_ISL_12934933|2022-05-15|Israel	MT	EPI_ISL_12934933	Israel	2022-05-15	BA.2	BA.2	BA.2	0	0.05	1	66	69.4737	1.05263
hCoV-19/Norway/21779/2022	MT|BA.2|EPI_ISL_12983138|2022-05-05|Norway	MT	EPI_ISL_12983138	Norway	2022-05-05	BA.2	BA.2	BA.2	0	0.05	1	62	65.2632	1.05263
hCoV-19/England/PHEP-YYR9COO/2022	MT|BA.2|EPI_ISL_13001457|2022-05-12|England	MT	EPI_ISL_13001457	England	2022-05-12	BA.2	BA.2	BA.2	0.333333	0.05	1	59	62.1053	1.05263
hCoV-19/Germany/NW-RKI-I-828316/2022	MT|BA.2|EPI_ISL_13009538|2022-05-18|Germany	MT	EPI_ISL_13009538	Germany	2022-05-18	BA.2	BA.2	BA.2	0	0.05	1	45	47.3684	1.05263
hCoV-19/Canada/AB-ABPHL-66127/2022	MT|BA.2|EPI_ISL_13016319|2022-04-25|Canada	MT	EPI_ISL_13016319	Canada	2022-04-25	BA.2	BA.2	BA.2	0.333333	0.05	0	59	62.1053	0
hCoV-19/France/OCC-GENBIO-U04CV1370203/2022	MT|BA.2|EPI_ISL_13027809|2022-05-17|France	MT	EPI_ISL_13027809	France	2022-05-17	BA.2	BA.2	BA.2	0	0.05	0	59	62.1053	0
hCoV-19/USA/NY-PRL-220520_00H06/2022	MT|BA.2|EPI_ISL_13042578|2022-05-18|USA	MT	EPI_ISL_13042578	USA	2022-05-18	BA.2	BA.2	BA.2	0	0.05	1	59	62.1053	1.05263
hCoV-19/Spain/CL-COV29295/2022	MT|BA.2|EPI_ISL_13092646|2022-04-22|Spain	MT	EPI_ISL_13092646	Spain	2022-04-22	BA.2	BA.2	BA.2	0.333333	0.05	0	45	47.3684	0
hCoV-19/England/PHEC-YYFPJ8K/2022	MT|BA.2|EPI_ISL_13131459|2022-05-26|England	MT	EPI_ISL_13131459	England	2022-05-26	BA.2	BA.2	BA.2	0	0.05	0	51	53.6842	0
hCoV-19/England/PHEC-YYFPJCY/2022	MT|BA.2|EPI_ISL_13131462|2022-05-26|England	MT	EPI_ISL_13131462	England	2022-05-26	BA.2	BA.2	BA.2	0.25	0.05	0	51	53.6842	0
hCoV-19/England/PHEC-YYFPJKR/2022	MT|BA.2|EPI_ISL_13131465|2022-05-26|England	MT	EPI_ISL_13131465	England	2022-05-26	BA.2	BA.2	BA.2	0.25	0.05	0	55	57.8947	0
hCoV-19/South Korea/KDCA63257/2022	MT|BA.2|EPI_ISL_13137315|2022-05-09|South_Korea	MT	EPI_ISL_13137315	South_Korea	2022-05-09	BA.2	BA.2	BA.2	0	0.05	0	60	63.1579	0
hCoV-19/Wales/QEUH-3E2653B/2022	MT|BA.2|EPI_ISL_13157163|2022-05-19|Wales	MT	EPI_ISL_13157163	Wales	2022-05-19	BA.2	BA.2	BA.2	0	0.05	0	60	63.1579	0
hCoV-19/India/KA-RFNB-8589/2022	MT|BA.2|EPI_ISL_13204029|2022-05|India	MT	EPI_ISL_13204029	India	2022-05	BA.2	BA.2	BA.2	0.5	0.05	0	48	50.5263	0
hCoV-19/Austria/LB-R00077-S131/2022	MT|BA.2|EPI_ISL_13234915|2022-05-23|Austria	MT	EPI_ISL_13234915	Austria	2022-05-23	BA.2	BA.2	BA.2	0	0.05	0	53	55.7895	0
hCoV-19/USA/NY-NYCPHL-012786/2022	MT|BA.2|EPI_ISL_13263752|2022-05-20|USA	MT	EPI_ISL_13263752	USA	2022-05-20	BA.2	BA.2	BA.2	0.5	0.05	0	59	62.1053	0
hCoV-19/Australia/VIC60990/2022	MT|BA.2|EPI_ISL_13275905|2022-05-23|Australia	MT	EPI_ISL_13275905	Australia	2022-05-23	BA.2	BA.2	BA.2	0	0.05	0	61	64.2105	0
hCoV-19/Australia/VIC61544/2022	MT|BA.2|EPI_ISL_13276280|2022-05-28|Australia	MT	EPI_ISL_13276280	Australia	2022-05-28	BA.2	BA.2	BA.2	0.5	0.05	0	62	65.2632	0
hCoV-19/India/TG-GMCH-ICMR-INSACOG-2166/2022	MT|BA.2|EPI_ISL_13307914|2022-05-28|India	MT	EPI_ISL_13307914	India	2022-05-28	BA.2	BA.2	BA.2	0.4	0.05	2	56	58.9474	2.10526
hCoV-19/Mauritius/CERI-KRISP-K043585/2022	MT|BA.2|EPI_ISL_13360215|2022-05-12|Mauritius	MT	EPI_ISL_13360215	Mauritius	2022-05-12	BA.2	BA.2	BA.2	0	0.05	0	53	55.7895	0
hCoV-19/England/PHEC-YYFQOGD/2022	MT|BA.2|EPI_ISL_13361594|2022-06-01|England	MT	EPI_ISL_13361594	England	2022-06-01	BA.2	BA.2	BA.2	0	0.05	1	58	61.0526	1.05263
hCoV-19/France/PDL-CHUN-221582142/2022	MT|BA.2|EPI_ISL_13361993|2022-06-07|France	MT	EPI_ISL_13361993	France	2022-06-07	BA.2	BA.2	BA.2	0	0.05	1	59	62.1053	1.05263
hCoV-19/USA/NV-NSPHL-22-00058262/2022	MT|BA.2|EPI_ISL_13396350|2022-06-11|USA	MT	EPI_ISL_13396350	USA	2022-06-11	BA.2	BA.2	BA.2	0	0.05	0	56	58.9474	0
hCoV-19/Puerto Rico/PR-PRPHL-MB0166/2022	MT|BA.2|EPI_ISL_13405742|2022-05-24|Puerto_Rico	MT	EPI_ISL_13405742	Puerto_Rico	2022-05-24	BA.2	BA.2	BA.2	0	0.05	0	53	55.7895	0
hCoV-19/Puerto Rico/PR-PRPHL-MB0170/2022	MT|BA.2|EPI_ISL_13405746|2022-05-24|Puerto_Rico	MT	EPI_ISL_13405746	Puerto_Rico	2022-05-24	BA.2	BA.2	BA.2	0	0.05	0	53	55.7895	0
hCoV-19/Switzerland/ZH-UZH-IMV-3ba646c7/2022	MT|BA.2|EPI_ISL_13436420|2022-06-07|Switzerland	MT	EPI_ISL_13436420	Switzerland	2022-06-07	BA.2	BA.2	BA.2	0	0.05	0	57	60	0
hCoV-19/New Zealand/22MV2569/2022	MT|BA.2|EPI_ISL_13437047|2022-05-16|New_Zealand	MT	EPI_ISL_13437047	New_Zealand	2022-05-16	BA.2	BA.2	BA.2	0	0.05	0	61	64.2105	0
hCoV-19/France/PDL-HMN-22062020746/2022	MT|BA.2|EPI_ISL_13450073|2022-03-07|France	MT	EPI_ISL_13450073	France	2022-03-07	BA.2	BA.2	BA.2	0	0.05	1	51	53.6842	1.05263
hCoV-19/USA/CA-CDPH-500059968/2022	MT|BA.2|EPI_ISL_13456910|2022-05-23|USA	MT	EPI_ISL_13456910	USA	2022-05-23	BA.2	BA.2	BA.2	0	0.05	1	56	58.9474	1.05263
hCoV-19/Croatia/37462/2022	MT|BA.2|EPI_ISL_13477679|2022-05-18|Croatia	MT	EPI_ISL_13477679	Croatia	2022-05-18	BA.2	BA.2	BA.2	0.5	0.05	1	59	62.1053	1.05263
hCoV-19/USA/NY-PRL-220615_02I08/2022	MT|BA.2|EPI_ISL_13479134|2022-06-14|USA	MT	EPI_ISL_13479134	USA	2022-06-14	BA.2	BA.2	BA.2	0.5	0.05	0	57	60	0
hCoV-19/Austria/CeMM30575/2022	MT|BA.2|EPI_ISL_13490685|2022-05-27|Austria	MT	EPI_ISL_13490685	Austria	2022-05-27	BA.2	BA.2	BA.2	0	0.05	0	63	66.3158	0
hCoV-19/India/KA-RFNB-11212/2022	MT|BA.2|EPI_ISL_13520032|2022-06|India	MT	EPI_ISL_13520032	India	2022-06	BA.2	BA.2	BA.2	0.5	0.05	0	52	54.7368	0
hCoV-19/Turkey/HSGM-IST-02667/2022	MT|BA.2|EPI_ISL_13620883|2022-06-22|Turkey	MT	EPI_ISL_13620883	Turkey	2022-06-22	BA.2	BA.2	BA.2	0	0.05	1	55	57.8947	1.05263
hCoV-19/USA/TX-HMH-MCoV-102514/2022	MT|BA.2|EPI_ISL_13624768|2022-06-22|USA	MT	EPI_ISL_13624768	USA	2022-06-22	BA.2	BA.2	BA.2	0	0.05	3	63	66.3158	3.15789
hCoV-19/Latvia/739220/2022	MT|BA.2|EPI_ISL_13627829|2022-04-06|Latvia	MT	EPI_ISL_13627829	Latvia	2022-04-06	BA.2	BA.2	BA.2	0	0.05	1	55	57.8947	1.05263
hCoV-19/France/NOR-CHURouen-22545248/2022	MT|BA.2|EPI_ISL_13655171|2022-06-23|France	MT	EPI_ISL_13655171	France	2022-06-23	BA.2	BA.2	BA.2	0	0.05	0	52	54.7368	0
hCoV-19/India/TN-CDFD-J-1407/2022	MT|BA.2|EPI_ISL_13667117|2022-06-17|India	MT	EPI_ISL_13667117	India	2022-06-17	BA.2	BA.2	BA.2	0	0.05	0	60	63.1579	0
hCoV-19/India/GJ-INSACOG-GBRC7266/2022	MT|BA.2|EPI_ISL_13697082|2022-05-09|India	MT	EPI_ISL_13697082	India	2022-05-09	BA.2	BA.2	BA.2	0	0.05	0	41	43.1579	0
hCoV-19/England/QEUH-3D1F220/2022	MT|BA.2|EPI_ISL_13712697|2022-04-03|England	MT	EPI_ISL_13712697	England	2022-04-03	BA.2	BA.2	BA.2	0	0.05	0	64	67.3684	0
hCoV-19/France/PDL-CHUN-221800626/2022	MT|BA.2|EPI_ISL_13740105|2022-06-29|France	MT	EPI_ISL_13740105	France	2022-06-29	BA.2	BA.2	BA.2	0.2	0.05	0	54	56.8421	0
hCoV-19/Australia/SA357819/2022	MT|BA.2|EPI_ISL_13743803|2022-06-27|Australia	MT	EPI_ISL_13743803	Australia	2022-06-27	BA.2	BA.2	BA.2	0	0.05	0	63	66.3158	0
hCoV-19/France/NOR-CHUR-76611662/2022	MT|BA.2|EPI_ISL_13840740|2022-06-23|France	MT	EPI_ISL_13840740	France	2022-06-23	BA.2	BA.2	BA.2	0	0.05	0	52	54.7368	0
hCoV-19/Belgium/rega-31866/2022	MT|BA.2|EPI_ISL_13879009|2022-02-21|Belgium	MT	EPI_ISL_13879009	Belgium	2022-02-21	BA.2	BA.2	BA.2	0	0.05	0	58	61.0526	0
hCoV-19/USA/NC-CLT-008431/2022	MT|BA.2|EPI_ISL_14104247|2022-05-24|USA	MT	EPI_ISL_14104247	USA	2022-05-24	BA.2	BA.2	BA.2	0	0.05	1	60	63.1579	1.05263
hCoV-19/USA/IA-SHL-2141106/2022	MT|BA.2|EPI_ISL_14161024|2022-07-22|USA	MT	EPI_ISL_14161024	USA	2022-07-22	BA.2	BA.2	BA.2	0	0.05	0	68	71.5789	0
hCoV-19/Colombia/COR-INS-VG-24013/2022	MT|BA.2|EPI_ISL_14161276|2022-07-12|Colombia	MT	EPI_ISL_14161276	Colombia	2022-07-12	BA.2	BA.2	BA.2	0	0.05	0	55	57.8947	0
hCoV-19/India/KA-RFNB-15141/2022	MT|BA.2|EPI_ISL_14161877|2022-07|India	MT	EPI_ISL_14161877	India	2022-07	BA.2	BA.2	BA.2	0	0.05	4	53	55.7895	4.21053
hCoV-19/England/PHEC-YYGPOJ6/2022	MT|BA.2|EPI_ISL_14301374|2022-07-22|England	MT	EPI_ISL_14301374	England	2022-07-22	BA.2	BA.2	BA.2	0	0.05	0	57	60	0
hCoV-19/India/PB-VRDLGMCPTA-ICMR-INSACOG-GS000038/2022	MT|BA.2|EPI_ISL_14421660|2022-06-16|India	MT	EPI_ISL_14421660	India	2022-06-16	BA.2	BA.2	BA.2	0.5	0.05	0	49	51.5789	0
hCoV-19/Russia/SMO-CRIE-7765639870/2022	MT|BA.2|EPI_ISL_14423349|2022-07-19|Russia	MT	EPI_ISL_14423349	Russia	2022-07-19	BA.2	BA.2	BA.2	0	0.05	1	57	60	1.05263
hCoV-19/Scotland/SCOT-18078/2022	MT|BA.2|EPI_ISL_14573015|2022-07-26|Scotland	MT	EPI_ISL_14573015	Scotland	2022-07-26	BA.2	BA.2	BA.2	0	0.05	1	64	67.3684	1.05263
hCoV-19/Belgium/rega-35512/2022	MT|BA.2|EPI_ISL_14630409|2022-03-09|Belgium	MT	EPI_ISL_14630409	Belgium	2022-03-09	BA.2	BA.2	BA.2	0	0.05	0	58	61.0526	0
hCoV-19/Belgium/rega-36730/2022	MT|BA.2|EPI_ISL_14631629|2022-03-18|Belgium	MT	EPI_ISL_14631629	Belgium	2022-03-18	BA.2	BA.2	BA.2	0	0.05	0	63	66.3158	0
hCoV-19/Malaysia/UiTM1955/2022	MT|BA.2|EPI_ISL_14663765|2022-05-23|Malaysia	MT	EPI_ISL_14663765	Malaysia	2022-05-23	BA.2	BA.2	BA.2	0	0.05	0	49	51.5789	0
hCoV-19/Malaysia/UiTM1912/2022	MT|BA.2|EPI_ISL_14663818|2022-04-16|Malaysia	MT	EPI_ISL_14663818	Malaysia	2022-04-16	BA.2	BA.2	BA.2	0	0.05	1	52	54.7368	1.05263
hCoV-19/Belgium/rega-40740/2022	MT|BA.2|EPI_ISL_14671250|2022-03-24|Belgium	MT	EPI_ISL_14671250	Belgium	2022-03-24	BA.2	BA.2	BA.2	0	0.05	0	59	62.1053	0
hCoV-19/Germany/ST-MD10074/2022	MT|BA.2|EPI_ISL_14721608|2022-06-11|Germany	MT	EPI_ISL_14721608	Germany	2022-06-11	BA.2	BA.2	BA.2	0.5	0.05	1	59	62.1053	1.05263
hCoV-19/Russia/SPE-RII-MH71991S/2022	MT|BA.2|EPI_ISL_14909157|2022-07-21|Russia	MT	EPI_ISL_14909157	Russia	2022-07-21	BA.2	BA.2	BA.2	0	0.05	0	47	49.4737	0
hCoV-19/India/KA-SLS-41008/2022	MT|BA.2|EPI_ISL_14976004|2022-07-20|India	MT	EPI_ISL_14976004	India	2022-07-20	BA.2	BA.2	BA.2	0	0.05	2	59	62.1053	2.10526
hCoV-19/India/KA-SLS-40251/2022	MT|BA.2|EPI_ISL_14986520|2022-07-07|India	MT	EPI_ISL_14986520	India	2022-07-07	BA.2	BA.2	BA.2	0	0.05	2	58	61.0526	2.10526
hCoV-19/India/KA-SLS-SEQ-42226/2022	MT|BA.2|EPI_ISL_14993134|2022-07-22|India	MT	EPI_ISL_14993134	India	2022-07-22	BA.2	BA.2	BA.2	0	0.05	2	59	62.1053	2.10526
hCoV-19/India/KA-SLS-SEQ-42241/2022	MT|BA.2|EPI_ISL_14993149|2022-07-30|India	MT	EPI_ISL_14993149	India	2022-07-30	BA.2	BA.2	BA.2	0	0.05	2	53	55.7895	2.10526
hCoV-19/USA/OR_UO_MAP005389/2022	MT|BA.2|EPI_ISL_15049027|2022-08-02|USA	MT	EPI_ISL_15049027	USA	2022-08-02	BA.2	BA.2	BA.2	0	0.05	0	45	47.3684	0
hCoV-19/India/GJ-INSACOG-GBRC8397/2022	MT|BA.2|EPI_ISL_15057970|2022-08-08|India	MT	EPI_ISL_15057970	India	2022-08-08	BA.2	BA.2	BA.2	0	0.05	1	47	49.4737	1.05263
hCoV-19/India/GJ-INSACOG-GBRC8412/2022	MT|BA.2|EPI_ISL_15057985|2022-08-08|India	MT	EPI_ISL_15057985	India	2022-08-08	BA.2	BA.2	BA.2	0	0.05	1	48	50.5263	1.05263
hCoV-19/India/GJ-INSACOG-GBRC8668/2022	MT|BA.2|EPI_ISL_15058241|2022-07-21|India	MT	EPI_ISL_15058241	India	2022-07-21	BA.2	BA.2	BA.2	0	0.05	3	49	51.5789	3.15789
hCoV-19/India/GJ-INSACOG-GBRC8774/2022	MT|BA.2|EPI_ISL_15073964|2022-08-19|India	MT	EPI_ISL_15073964	India	2022-08-19	BA.2	BA.2	BA.2	0.666667	0.05	1	48	50.5263	1.05263
hCoV-19/India/KA-19056_S207_AL_R1_001/2022	MT|BA.2|EPI_ISL_15310150|2022-08-17|India	MT	EPI_ISL_15310150	India	2022-08-17	BA.2	BA.2	BA.2	0	0.05	3	59	62.1053	3.15789
hCoV-19/USA/CA-LACPHL-AF15199/2022	MT|BA.2|EPI_ISL_15515775|2022-10-09|USA	MT	EPI_ISL_15515775	USA	2022-10-09	BA.2	BA.2	BA.2	0	0.05	2	56	58.9474	2.10526
hCoV-19/India/OR-ILSGS19898/2022	MT|BA.2|EPI_ISL_15614947|2022-09-27|India	MT	EPI_ISL_15614947	India	2022-09-27	BA.2.75	BA.2	BA.2.75	0.5	0.05	1	59	62.1053	1.05263
hCoV-19/USA/DE-DHSS-B1198365/2022	MT|BA.2|EPI_ISL_15639990|2022-04-25|USA	MT	EPI_ISL_15639990	USA	2022-04-25	BA.2	BA.2	BA.2	0	0.05	1	62	65.2632	1.05263
hCoV-19/USA/CA-SEARCH-91558/2022	MT|BA.2|EPI_ISL_15709541|2022-05-02|USA	MT	EPI_ISL_15709541	USA	2022-05-02	BA.2	BA.2	BA.2	0	0.05	0	68	71.5789	0
hCoV-19/India/DL-NII-1429/2022	MT|BA.2|EPI_ISL_15757298|2022-08-04|India	MT	EPI_ISL_15757298	India	2022-08-04	BA.2	BA.2	BA.2	0	0.05	4	39	41.0526	4.21053
hCoV-19/England/PHEC-YY8MI9X/2022	MT|BA.2|EPI_ISL_15760812|2022-10-28|England	MT	EPI_ISL_15760812	England	2022-10-28	BA.2	BA.2	BA.2	0	0.05	2	64	67.3684	2.10526
hCoV-19/Malaysia/HPUPM_NGS0490/2022	MT|BA.2|EPI_ISL_15819759|2022-08-08|Malaysia	MT	EPI_ISL_15819759	Malaysia	2022-08-08	BA.2.75	BA.2	BA.2.75	0.5	0.05	1	59	62.1053	1.05263
hCoV-19/India/MH-ICMR-NIV-INSACOG-NIVSARI-22-2806/2022	MT|BA.2|EPI_ISL_15854994|2022-10-03|India	MT	EPI_ISL_15854994	India	2022-10-03	BA.2	BA.2	BA.2	0	0.05	4	50	52.6316	4.21053
hCoV-19/Germany/SN-RKI-I-1031956/2022	MT|BA.2|EPI_ISL_15903600|2022-09-01|Germany	MT	EPI_ISL_15903600	Germany	2022-09-01	BA.2	BA.2	BA.2	0	0.05	2	49	51.5789	2.10526
hCoV-19/England/PHEC-YY8PSCT/2022	MT|BA.2|EPI_ISL_15910198|2022-11-10|England	MT	EPI_ISL_15910198	England	2022-11-10	BA.2	BA.2	BA.2	0.5	0.05	2	64	67.3684	2.10526
hCoV-19/USA/NY-PRL-221209_00P07/2022	MT|BA.2|EPI_ISL_16172802|2022-12-07|USA	MT	EPI_ISL_16172802	USA	2022-12-07	BA.2	BA.2	BA.2	0	0.05	4	61	64.2105	4.21053
hCoV-19/Spain/AN-CBA-26214/2022	MT|BA.2|EPI_ISL_16240532|2022-05-31|Spain	MT	EPI_ISL_16240532	Spain	2022-05-31	BA.2	BA.2	BA.2	0	0.05	0	52	54.7368	0
hCoV-19/USA/MN-MDH-32745/2022	MT|BA.2|EPI_ISL_16423228|2022-12-15|USA	MT	EPI_ISL_16423228	USA	2022-12-15	BA.2	BA.2	BA.2	0	0.05	5	60	63.1579	5.26316
hCoV-19/Germany/BY-RKI-I-1076766/2022	MT|BA.2|EPI_ISL_16487401|2022-12-26|Germany	MT	EPI_ISL_16487401	Germany	2022-12-26	BA.2	BA.2	BA.2	0	0.05	0	35	36.8421	0
hCoV-19/Indonesia/BT-BRIN-225/2022	MT|BA.2|EPI_ISL_16532069|2022-12-01|Indonesia	MT	EPI_ISL_16532069	Indonesia	2022-12-01	BA.2	BA.2	BA.2	0	0.05	2	53	55.7895	2.10526
hCoV-19/Israel/ICH-741195204/2022	MT|BA.2|EPI_ISL_16548869|2022-12-28|Israel	MT	EPI_ISL_16548869	Israel	2022-12-28	BA.2	BA.2	BA.2	0.444444	0.05	2	62	65.2632	2.10526
hCoV-19/Austria/AGES-1165078/2022	MT|BA.2|EPI_ISL_16556766|2022-12-13|Austria	MT	EPI_ISL_16556766	Austria	2022-12-13	BA.2	BA.2	BA.2	0	0.05	1	60	63.1579	1.05263
hCoV-19/England/PHEC-YY84T8F/2023	MT|BA.2|EPI_ISL_16586683|2023-01-07|England	MT	EPI_ISL_16586683	England	2023-01-07	BA.2	BA.2	BA.2	0	0.05	5	74	77.8947	5.26316
hCoV-19/Indonesia/KI-FK_UNMUL-32248/2022	MT|BA.2|EPI_ISL_16608595|2022-11-18|Indonesia	MT	EPI_ISL_16608595	Indonesia	2022-11-18	BA.2	BA.2	BA.2	0	0.05	2	52	54.7368	2.10526
hCoV-19/Italy/SIC-CQRC-3422072832/2022	MT|BA.2|EPI_ISL_16612080|2022-12-22|Italy	MT	EPI_ISL_16612080	Italy	2022-12-22	BA.2	BA.2	BA.2	0	0.05	4	66	69.4737	4.21053
hCoV-19/USA/VA-VTVAS2-GSC41034/2022	MT|BA.2|EPI_ISL_16682325|2022-12-10|USA	MT	EPI_ISL_16682325	USA	2022-12-10	BA.2	BA.2	BA.2	0	0.05	3	70	73.6842	3.15789
hCoV-19/USA/TX-HMH-M-123603/2023	MT|BA.2|EPI_ISL_16762084|2023-01-14|USA	MT	EPI_ISL_16762084	USA	2023-01-14	BA.2	BA.2	BA.2	0	0.05	2	67	70.5263	2.10526
hCoV-19/Poland/0091WSN2023_wsseol/2023	MT|BA.2|EPI_ISL_16834636|2023-02-01|Poland	MT	EPI_ISL_16834636	Poland	2023-02-01	Others	BA.2	BQ.1.1	0	0.05	2	62	65.2632	2.10526
hCoV-19/Germany/BW-RKI-I-1100344/2023	MT|BA.2|EPI_ISL_16883095|2023-01-31|Germany	MT	EPI_ISL_16883095	Germany	2023-01-31	BA.2	BA.2	BA.2	0	0.05	3	58	61.0526	3.15789
hCoV-19/USA/TX-HMH-M-125050/2023	MT|BA.2|EPI_ISL_16919575|2023-02-06|USA	MT	EPI_ISL_16919575	USA	2023-02-06	BA.2	BA.2	BA.2	0	0.05	2	61	64.2105	2.10526
hCoV-19/Germany/BW-RKI-I-1109027/2023	MT|BA.2|EPI_ISL_17004997|2023-02-15|Germany	MT	EPI_ISL_17004997	Germany	2023-02-15	BA.2	BA.2	BA.2	0	0.05	3	58	61.0526	3.15789
hCoV-19/Malaysia/HPUPM_NGS0930/2022	MT|BA.2|EPI_ISL_17037250|2022-12-22|Malaysia	MT	EPI_ISL_17037250	Malaysia	2022-12-22	BA.2	BA.2	BA.2	0	0.05	4	61	64.2105	4.21053
hCoV-19/Bahrain/CDL-870605879/2022	MT|BA.2|EPI_ISL_17081746|2022-12-22|Bahrain	MT	EPI_ISL_17081746	Bahrain	2022-12-22	Others	BA.2	BN.1	0	0.05	1	64	67.3684	1.05263
hCoV-19/Spain/AN-PMC-32776/2022	MT|BA.2|EPI_ISL_17215460|2022-11-23|Spain	MT	EPI_ISL_17215460	Spain	2022-11-23	BA.2	BA.2	BA.2	0	0.05	6	59	62.1053	6.31579
hCoV-19/Germany/BY-RKI-I-1122130/2023	BG|BA.2.75|EPI_ISL_17256239|2023-03-03|Germany	BG	EPI_ISL_17256239	Germany	2023-03-03	BA.2.75	BA.2.75	BA.2.75	0	0.05	4	41	43.1579	4.21053
hCoV-19/Spain/AN-PMC-33680/2023	BG|BA.4|EPI_ISL_17275884|2023-03-10|Spain	BG	EPI_ISL_17275884	Spain	2023-03-10	Others	BA.4	BA.4	0	0.05	1	49	51.5789	1.05263
hCoV-19/South Korea/KDCA221239/2023	BG|BA.2|EPI_ISL_17294034|2023-03-01|South_Korea	BG	EPI_ISL_17294034	South_Korea	2023-03-01	BA.2	BA.2	BA.2	0	0.05	1	48	50.5263	1.05263
hCoV-19/Germany/NW-RKI-I-543018/2022	MT|BA.2|EPI_ISL_17319755|2022-02-02|Germany	MT	EPI_ISL_17319755	Germany	2022-02-02	BA.2	BA.2	BA.2	0	0.05	0	61	64.2105	0
hCoV-19/Mauritius/11108/2023	BG|BA.2|EPI_ISL_17395630|2023-03-08|Mauritius	BG	EPI_ISL_17395630	Mauritius	2023-03-08	BA.2	BA.2	BA.2	0	0.05	2	47	49.4737	2.10526
hCoV-19/Germany/ST-MD13024/2023	BG|BA.2.75|EPI_ISL_17433832|2023-03-24|Germany	BG	EPI_ISL_17433832	Germany	2023-03-24	BA.2.75	BA.2.75	BA.2.75	0	0.05	4	69	72.6316	4.21053
hCoV-19/Brazil/MG-LBI_10/2022	MT|BA.2|EPI_ISL_17444781|2022-06-01|Brazil	MT	EPI_ISL_17444781	Brazil	2022-06-01	BA.2	BA.2	BA.2	0.5	0.05	0	42	44.2105	0
hCoV-19/Sweden/C-03_SE600_000200348446N2/2022	MT|BA.2|EPI_ISL_17624922|2022-02-03|Sweden	MT	EPI_ISL_17624922	Sweden	2022-02-03	BA.2	BA.2	BA.2	0	0.05	0	85	89.4737	0
hCoV-19/Australia/SA539268/2023	BG|BA.2|EPI_ISL_17703815|2023-05-13|Australia	BG	EPI_ISL_17703815	Australia	2023-05-13	BA.2	BA.2	BA.2	0	0.05	0	76	80	0
hCoV-19/Italy/LAZ-DIBS-10778/2023	MT|BA.2|EPI_ISL_17833706|2023-05-10|Italy	MT	EPI_ISL_17833706	Italy	2023-05-10	BA.2	BA.2	BA.2	0	0.05	1	53	55.7895	1.05263
hCoV-19/Iceland/L-4231/2023	BG|XBB.1.5.72|EPI_ISL_17980590|2023-07-03|Iceland	BG	EPI_ISL_17980590	Iceland	2023-07-03	XBB.1.5	XBB.1.5.72	XBB.1.5.72	0	0.05	5	67	70.5263	5.26316
hCoV-19/USA/NJ-GBW-H20-330-9811/2023	BG|XBB.1.5|EPI_ISL_17985480|2023-07-01|USA	BG	EPI_ISL_17985480	USA	2023-07-01	XBB.1.5	XBB.1.5	XBB.1.5	0.666667	0.05	6	73	76.8421	6.31579
hCoV-19/USA/VA-GBW-H20-336-3005/2023	BG|XBB.1.5|EPI_ISL_17985553|2023-07-04|USA	BG	EPI_ISL_17985553	USA	2023-07-04	XBB.1.5	XBB.1.5	XBB.1.5	0.75	0.05	5	77	81.0526	5.26316
hCoV-19/USA/NY-NYULH-15403/2023	BG|XBB.1.5|EPI_ISL_17986667|2023-07-03|USA	BG	EPI_ISL_17986667	USA	2023-07-03	XBB.1.5	XBB.1.5	XBB.1.5	0	0.05	2	60	63.1579	2.10526
hCoV-19/USA/AZ-CDC-LC1046039/2023	BG|XBB.1.5|EPI_ISL_18005379|2023-07-05|USA	BG	EPI_ISL_18005379	USA	2023-07-05	XBB.1.5	XBB.1.5	XBB.1.5.107	0	0.05	5	70	73.6842	5.26316
hCoV-19/Spain/PV-HUD-96388818/2023	BG|XBB.1.5.72|EPI_ISL_18008619|2023-07-12|Spain	BG	EPI_ISL_18008619	Spain	2023-07-12	XBB.1.5	XBB.1.5.72	XBB.1.5.72	0	0.05	5	68	71.5789	5.26316
hCoV-19/Australia/NSW-ICPMR-48543/2023	BG|XBB.1.5.97|EPI_ISL_18012238|2023-07-01|Australia	BG	EPI_ISL_18012238	Australia	2023-07-01	XBB.1.5	XBB.1.5.97	XBB.1.5.97	0	0.05	5	71	74.7368	5.26316
hCoV-19/Italy/VEN-IZSVe-23RS8172-1_VI/2023	BG|XBB.1.5.72|EPI_ISL_18032356|2023-07-10|Italy	BG	EPI_ISL_18032356	Italy	2023-07-10	XBB.1.5	XBB.1.5.72	XBB.1.5.72	0	0.05	3	71	74.7368	3.15789
hCoV-19/USA/LA-GSU203/2023	BG|XBB.1.5|EPI_ISL_18037725|2023-07-21|USA	BG	EPI_ISL_18037725	USA	2023-07-21	XBB.1.5	XBB.1.5	XBB.1.5	0	0.05	5	76	80	5.26316
hCoV-19/Canada/NB-CHUDGLD-05G-MM00026R/2023	BG|XBB.1.5|EPI_ISL_18043764|2023-07-05|Canada	BG	EPI_ISL_18043764	Canada	2023-07-05	XBB.1.5	XBB.1.5	XBB.1.5	0	0.05	5	77	81.0526	5.26316
hCoV-19/Iceland/L-4242/2023	BG|BA.2.5|EPI_ISL_18044164|2023-06-14|Iceland	BG	EPI_ISL_18044164	Iceland	2023-06-14	XBB.1.5	BA.2.5	BA.2	0.5	0.05	0	77	81.0526	0
hCoV-19/USA/MS-MSPHL-0225/2023	BG|XBB.1.5|EPI_ISL_18044653|2023-07-05|USA	BG	EPI_ISL_18044653	USA	2023-07-05	XBB.1.5	XBB.1.5	XBB.1.5	0	0.05	5	70	73.6842	5.26316
hCoV-19/France/ARA-CHUGA-3072606900/2023	BG|XBB.1.5.94|EPI_ISL_18044764|2023-07-21|France	BG	EPI_ISL_18044764	France	2023-07-21	XBB.1.5	XBB.1.5.94	XBB.1.5.94	0	0.05	5	63	66.3158	5.26316
hCoV-19/USA/CA-HLX-STM-G8DW87YSV/2023	BG|HA.2|EPI_ISL_18046168|2023-07-04|USA	BG	EPI_ISL_18046168	USA	2023-07-04	XBB.1.5	HA.2	HA.2	0	0.05	2	52	54.7368	2.10526
hCoV-19/USA/CA-LACPHL-AY00475/2023	BG|XBB.1.5|EPI_ISL_18046494|2023-07-10|USA	BG	EPI_ISL_18046494	USA	2023-07-10	XBB.1.5	XBB.1.5	XBB.1.5	0	0.05	5	73	76.8421	5.26316
hCoV-19/New Zealand/ESR-ZA3597/2023	BG|XBB.1.5|EPI_ISL_18047814|2023-07-06|New_Zealand	BG	EPI_ISL_18047814	New_Zealand	2023-07-06	XBB.1.5	XBB.1.5	XBB.1.5	0.571429	0.05	5	70	73.6842	5.26316
hCoV-19/Israel/ICH-741198351/2023	BG|XBB.1.5|EPI_ISL_18050870|2023-07-19|Israel	BG	EPI_ISL_18050870	Israel	2023-07-19	XBB.1.5	XBB.1.5	XBB.1.5	0.333333	0.05	5	76	80	5.26316
hCoV-19/USA/WA-PHL-034573/2023	BG|XBB.1.5|EPI_ISL_18055086|2023-07-06|USA	BG	EPI_ISL_18055086	USA	2023-07-06	XBB.1.5	XBB.1.5	XBB.1.5	0	0.05	5	71	74.7368	5.26316
hCoV-19/USA/UT-UPHL-230728946512/2023	BG|XBB.1.5|EPI_ISL_18058215|2023-07-09|USA	BG	EPI_ISL_18058215	USA	2023-07-09	XBB.1.5	XBB.1.5	XBB.1.5.107	0	0.05	5	76	80	5.26316
hCoV-19/Cabo Verde/ST-AG0086/2023	BG|XBB.1.5|EPI_ISL_18059197|2023-07-14|Cabo_Verde	BG	EPI_ISL_18059197	Cabo_Verde	2023-07-14	XBB.1.5	XBB.1.5	XBB.1.5	0	0.05	5	72	75.7895	5.26316
hCoV-19/Canada/NB-CHUDGLD-21G-MM00012R/2023	BG|XBB.1.5|EPI_ISL_18059711|2023-07-21|Canada	BG	EPI_ISL_18059711	Canada	2023-07-21	XBB.1.5	XBB.1.5	XBB.1.5	0	0.05	5	71	74.7368	5.26316
hCoV-19/Puerto Rico/PR-CVL-018744/2023	BG|XBB.1.5|EPI_ISL_18059981|2023-07-05|Puerto_Rico	BG	EPI_ISL_18059981	Puerto_Rico	2023-07-05	BA.2	XBB.1.5	XBB.1.5	0	0.05	5	78	82.1053	5.26316
hCoV-19/Puerto Rico/PR-CVL-018745/2023	BG|XBB.1.5|EPI_ISL_18059982|2023-07-05|Puerto_Rico	BG	EPI_ISL_18059982	Puerto_Rico	2023-07-05	XBB.1.5	XBB.1.5	XBB.1.5	0	0.05	5	77	81.0526	5.26316
hCoV-19/Puerto Rico/PR-CVL-018746/2023	BG|XBB.1.5|EPI_ISL_18059983|2023-07-03|Puerto_Rico	BG	EPI_ISL_18059983	Puerto_Rico	2023-07-03	XBB.1.5	XBB.1.5	XBB.1.5	0	0.05	5	70	73.6842	5.26316
hCoV-19/Puerto Rico/PR-CVL-018758/2023	BG|XBB.1.5|EPI_ISL_18059994|2023-07-03|Puerto_Rico	BG	EPI_ISL_18059994	Puerto_Rico	2023-07-03	XBB.1.5	XBB.1.5	XBB.1.5	0	0.05	5	70	73.6842	5.26316
hCoV-19/England/CLIMB-CM7YJM7H/2022	MT|BA.2|EPI_ISL_18063522|2022-03-31|England	MT	EPI_ISL_18063522	England	2022-03-31	XBB.1.5	BA.2	BA.2	0.333333	0.05	1	71	74.7368	1.05263
hCoV-19/England/CLIMB-CM7Y8J9X/2022	MT|BA.2|EPI_ISL_18064336|2022-04-05|England	MT	EPI_ISL_18064336	England	2022-04-05	BA.2	BA.2	BA.2	0	0.05	0	55	57.8947	0
hCoV-19/USA/IL-RIPHL_13581_G/2023	BG|XBB.1.5|EPI_ISL_18065595|2023-07-12|USA	BG	EPI_ISL_18065595	USA	2023-07-12	XBB.1.5	XBB.1.5	XBB.1.5	0.4	0.05	4	73	76.8421	4.21053
hCoV-19/USA/CA-HLX-STM-TMCBTM6FR/2023	BG|XBB.1.5.72|EPI_ISL_18069669|2023-07-19|USA	BG	EPI_ISL_18069669	USA	2023-07-19	XBB.1.5	XBB.1.5.72	XBB.1.5.72	0	0.05	2	47	49.4737	2.10526
hCoV-19/England/CLIMB-CM7YFDIG/2023	BG|XBB.1.5|EPI_ISL_18072042|2023-07-24|United_Kingdom	BG	EPI_ISL_18072042	United_Kingdom	2023-07-24	XBB.1.5	XBB.1.5	XBB.1.5	0.333333	0.05	5	64	67.3684	5.26316
hCoV-19/Ecuador/GENSBIO-INSPI-SG-494/2023	BG|XBB.1.5.72|EPI_ISL_18075763|2023-07-17|Ecuador	BG	EPI_ISL_18075763	Ecuador	2023-07-17	XBB.1.5	XBB.1.5.72	XBB.1.5.72	0	0.05	0	58	61.0526	0
hCoV-19/Colombia/DC-INS-VG-30261/2023	BG|XBB.1.5.77|EPI_ISL_18076930|2023-07-07|Colombia	BG	EPI_ISL_18076930	Colombia	2023-07-07	XBB.1.5	XBB.1.5.77	XBB.1.5.77	0	0.05	5	72	75.7895	5.26316
hCoV-19/Brazil/MG-FUNED-311582012/2023	BG|GK.1|EPI_ISL_18078895|2023-07-08|Brazil	BG	EPI_ISL_18078895	Brazil	2023-07-08	XBB.1.5	GK.1	GK.1	0	0.05	3	54	56.8421	3.15789
hCoV-19/USA/CA-CDPH-500118636/2023	BG|XBB.1.5.34|EPI_ISL_18080593|2023-07-03|USA	BG	EPI_ISL_18080593	USA	2023-07-03	XBB.1.5	XBB.1.5.34	XBB.1.5.34	0	0.05	5	66	69.4737	5.26316
hCoV-19/USA/CA-CDPH-500118733/2023	BG|XBB.1.5.104|EPI_ISL_18080624|2023-07-04|USA	BG	EPI_ISL_18080624	USA	2023-07-04	XBB.1.5	XBB.1.5.104	XBB.1.5.104	0	0.05	5	67	70.5263	5.26316
hCoV-19/USA/CA-CDPH-500119149/2023	BG|XBB.1.5.100|EPI_ISL_18080689|2023-07-07|USA	BG	EPI_ISL_18080689	USA	2023-07-07	XBB.1.5	XBB.1.5.100	XBB.1.5.100	0.5	0.05	5	71	74.7368	5.26316
hCoV-19/USA/CA-CDPH-500119166/2023	BG|XBB.1.5|EPI_ISL_18080695|2023-07-05|USA	BG	EPI_ISL_18080695	USA	2023-07-05	XBB.1.5	XBB.1.5	XBB.1.5	0.666667	0.05	5	71	74.7368	5.26316
hCoV-19/USA/CA-CDPH-500119160/2023	BG|XBB.1.5.95|EPI_ISL_18080704|2023-07-06|USA	BG	EPI_ISL_18080704	USA	2023-07-06	XBB.1.5	XBB.1.5.95	XBB.1.5.95	0	0.05	5	71	74.7368	5.26316
hCoV-19/USA/CA-CDPH-500118863/2023	BG|GK.2|EPI_ISL_18080711|2023-07-10|USA	BG	EPI_ISL_18080711	USA	2023-07-10	XBB.1.5	GK.2	GK.2	0	0.05	2	67	70.5263	2.10526
hCoV-19/USA/CA-CDPH-500118493/2023	BG|HT.1|EPI_ISL_18080778|2023-07-03|USA	BG	EPI_ISL_18080778	USA	2023-07-03	XBB.1.5	HT.1	HT.1	0	0.05	5	65	68.4211	5.26316
hCoV-19/USA/CA-CDPH-500118867/2023	BG|XBB.1.5|EPI_ISL_18080792|2023-07-07|USA	BG	EPI_ISL_18080792	USA	2023-07-07	XBB.1.5	XBB.1.5	XBB.1.5	0.333333	0.05	5	66	69.4737	5.26316
hCoV-19/USA/CA-CDPH-500118844/2023	BG|XBB.1.5|EPI_ISL_18081032|2023-07-06|USA	BG	EPI_ISL_18081032	USA	2023-07-06	XBB.1.5	XBB.1.5	XBB.1.5	0	0.05	4	68	71.5789	4.21053
hCoV-19/USA/CA-CDPH-500118682/2023	BG|XBB.1.5|EPI_ISL_18081055|2023-07-03|USA	BG	EPI_ISL_18081055	USA	2023-07-03	XBB.1.5	XBB.1.5	XBB.1.5	0.333333	0.05	4	75	78.9474	4.21053
hCoV-19/Puerto Rico/PR-CVL-019089/2023	BG|XBB.1.5.77|EPI_ISL_18090739|2023-07-10|Puerto_Rico	BG	EPI_ISL_18090739	Puerto_Rico	2023-07-10	XBB.1.5	XBB.1.5.77	XBB.1.5.77	0	0.05	5	64	67.3684	5.26316
hCoV-19/England/CLIMB-CM7YFBOX/2023	BG|XBB.1.5.72|EPI_ISL_18094232|2023-07-29|United_Kingdom	BG	EPI_ISL_18094232	United_Kingdom	2023-07-29	XBB.1.5	XBB.1.5.72	XBB.1.5.72	0	0.05	5	72	75.7895	5.26316
hCoV-19/France/OCC-HCL-723000924101/2023	BG|XBB.1.5|EPI_ISL_18094720|2023-07-31|France	BG	EPI_ISL_18094720	France	2023-07-31	XBB.1.5	XBB.1.5	XBB.1.5	0	0.05	5	72	75.7895	5.26316
hCoV-19/USA/UT-UPHL-230805787247/2023	BG|XBB.1.5|EPI_ISL_18095478|2023-07-17|USA	BG	EPI_ISL_18095478	USA	2023-07-17	XBB.1.5	XBB.1.5	XBB.1.5	0	0.05	5	82	86.3158	5.26316
hCoV-19/USA/TX-HMH-M-130389/2023	BG|XBB.1.5|EPI_ISL_18099023|2023-07-25|USA	BG	EPI_ISL_18099023	USA	2023-07-25	XBB.1.5	XBB.1.5 (consensus call)	XBB.1	0.5	0.05	5	69	72.6316	5.26316
hCoV-19/Guatemala/2072-DLNS/2023	BG|XBB.1.5.77|EPI_ISL_18099427|2023-07-25|Guatemala	BG	EPI_ISL_18099427	Guatemala	2023-07-25	XBB.1.5	XBB.1.5.77	XBB.1.5.77	0	0.05	1	61	64.2105	1.05263
hCoV-19/Guatemala/2058-DLNS/2023	BG|XBB.1.5.78|EPI_ISL_18099428|2023-07-27|Guatemala	BG	EPI_ISL_18099428	Guatemala	2023-07-27	XBB.1.5	XBB.1.5.78	XBB.1.5.78	0	0.05	1	57	60	1.05263
hCoV-19/Brazil/MG-FIOCRUZ-IRR189/2023	BG|HA.1|EPI_ISL_18099810|2023-07-03|Brazil	BG	EPI_ISL_18099810	Brazil	2023-07-03	XBB.1.5	HA.1	HA.1	0	0.05	5	66	69.4737	5.26316
hCoV-19/Canada/NS-NSH-639626/2023	BG|XBB.1.5|EPI_ISL_18099855|2023-07-25|Canada	BG	EPI_ISL_18099855	Canada	2023-07-25	XBB.1.5	XBB.1.5	XBB.1.5	0	0.05	6	69	72.6316	6.31579
hCoV-19/Canada/ON-PHL-23-27615/2023	BG|XBB.1.5.72|EPI_ISL_18105124|2023-08-04|Canada	BG	EPI_ISL_18105124	Canada	2023-08-04	Others	XBB.1.5.72	XBB.1.5.72	0	0.05	5	76	80	5.26316
hCoV-19/Hubei/HCDC-SY2457/2023	BG|XBB.1.5|EPI_ISL_18105528|2023-07-31|China	BG	EPI_ISL_18105528	China	2023-07-31	XBB.1.5	XBB.1.5 (consensus call)	XBB.1	0.75	0.05	5	74	77.8947	5.26316
hCoV-19/Spain/IB-HUSE-08545/2023	BG|XBB.1.5.72|EPI_ISL_18106867|2023-08-04|Spain	BG	EPI_ISL_18106867	Spain	2023-08-04	XBB.1.5	XBB.1.5.72	XBB.1.5.72	0	0.05	5	76	80	5.26316
hCoV-19/Luxembourg/LNS3668477/2023	BG|XBB.1.5|EPI_ISL_18107152|2023-07-11|Luxembourg	BG	EPI_ISL_18107152	Luxembourg	2023-07-11	Others	XBB.1.5	XBB.1.5	0.833333	0.05	0	51	53.6842	0
hCoV-19/USA/MI-UM-10052670540/2023	BG|BA.2.86|EPI_ISL_18110065|2023-08-03|USA	BG	EPI_ISL_18110065	USA	2023-08-03	XBB.1.5	BA.2.86	BA.2.86	0	0.05	28	98	103.158	29.4737
hCoV-19/USA/CA-HLX-STM-R5HK4U3HG/2023	BG|XBB.1.5|EPI_ISL_18113826|2023-07-25|USA	BG	EPI_ISL_18113826	USA	2023-07-25	XBB.1.5	XBB.1.5	XBB.1.5	0	0.05	3	59	62.1053	3.15789
hCoV-19/USA/CA-HLX-STM-VTV8MBKWG/2023	BG|XBB.1.5|EPI_ISL_18113946|2023-07-25|USA	BG	EPI_ISL_18113946	USA	2023-07-25	XBB.1.5	XBB.1.5	XBB.1.5	0.333333	0.05	3	56	58.9474	3.15789
hCoV-19/USA/OH-ODH-SC3031843/2023	BG|XBB.1.5.104|EPI_ISL_18114489|2023-07-16|USA	BG	EPI_ISL_18114489	USA	2023-07-16	XBB.1.5	XBB.1.5.104	XBB.1.5.104	0	0.05	5	75	78.9474	5.26316
hCoV-19/USA/OH-ODH-SC3031847/2023	BG|XBB.1.5|EPI_ISL_18114492|2023-07-17|USA	BG	EPI_ISL_18114492	USA	2023-07-17	XBB.1.5	XBB.1.5	XBB.1.5	0	0.05	5	75	78.9474	5.26316
hCoV-19/Denmark/DCGC-647694/2023	BG|BA.2.86.1|EPI_ISL_18114953|2023-08-07|Denmark	BG	EPI_ISL_18114953	Denmark	2023-08-07	XBB.1.5	BA.2.86.1	BA.2.86.1	0	0.05	31	96	101.053	32.6316
hCoV-19/South Korea/KDCA255909/2023	BG|XBB.1.5|EPI_ISL_18116758|2023-07-18|South_Korea	BG	EPI_ISL_18116758	South_Korea	2023-07-18	XBB.1.5	XBB.1.5	XBB.1.5	0.5	0.05	4	76	80	4.21053
hCoV-19/France/un-IHUMI-081162/2022	MT|BA.2|EPI_ISL_18172252|2022-04|France	MT	EPI_ISL_18172252	France	2022-04	BA.2	BA.2	BA.2	0	0.05	0	57	60	0
hCoV-19/Iceland/L-4423/2023	FG|JN.1|EPI_ISL_18286817|2023-08-29|Iceland	FG	EPI_ISL_18286817	Iceland	2023-08-29	JN.1*	JN.1	JN.1	0.5	0.05	25	78	82.1053	26.3158
hCoV-19/USA/CA-SEARCH-226127/2023	MT|BA.2|EPI_ISL_18289102|2023-02-14|USA	MT	EPI_ISL_18289102	USA	2023-02-14	BA.2.86*	BA.2	BA.2	0	0.05	2	45	47.3684	2.10526
hCoV-19/Denmark/DCGC-661118/2023	MT|BA.2|EPI_ISL_18377651|2023-09-25|Denmark	MT	EPI_ISL_18377651	Denmark	2023-09-25	BA.2.86*	BA.2	BA.2	0	0.05	5	58	61.0526	5.26316
hCoV-19/Wales/CLIMB-CM7YMUS6/2023	FG|JN.3|EPI_ISL_18392818|2023-08-31|United_Kingdom	FG	EPI_ISL_18392818	United_Kingdom	2023-08-31	JN.1*	JN.3	JN.3	0	0.05	29	94	98.9474	30.5263
hCoV-19/Saudi Arabia/KAUST656/2023	MT|BA.2|EPI_ISL_18405783|2023-03-28|Saudi_Arabia	MT	EPI_ISL_18405783	Saudi_Arabia	2023-03-28	BA.2	BA.2	BA.2	0	0.05	3	46	48.4211	3.15789
hCoV-19/Italy/CAM-TIGEM-48482/2023	MT|BA.2|EPI_ISL_18443699|2023-10-10|Italy	MT	EPI_ISL_18443699	Italy	2023-10-10	JN.1*	BA.2	BA.2	0	0.05	2	48	50.5263	2.10526
hCoV-19/USA/CA-HLX-STM-TSJKAK439/2023	FG|JN.1|EPI_ISL_18469308|2023-10-19|USA	FG	EPI_ISL_18469308	USA	2023-10-19	BA.2.86*	JN.1.44	JN.1	0	0.05	14	58	61.0526	14.7368
hCoV-19/Austria/AGES-AZ-1664776/2023	FG|JN.1|EPI_ISL_18536326|2023-01-13|Austria	FG	EPI_ISL_18536326	Austria	2023-11-13	BA.2.86*	JN.1	JN.1	0	0.05	30	101	106.316	31.5789
hCoV-19/Iceland/L-4871/2023	FG|BA.2.86.1|EPI_ISL_18537083|2023-11-13|Iceland	FG	EPI_ISL_18537083	Iceland	2023-11-13	JN.1*	JN.1.4	JN.1.4	0	0.05	29	94	98.9474	30.5263
hCoV-19/Poland/0827WSN2023_wsseol/2023	FG|BA.2.86.1|EPI_ISL_18544892|2023-11-10|Poland	FG	EPI_ISL_18544892	Poland	2023-11-10	BA.2.86*	BA.2.86.1	BA.2.86.1	0	0.05	19	78	82.1053	20
hCoV-19/Australia/QLD0x013C2A/2023	MT|BA.2|EPI_ISL_18567985|2023-11-08|Australia	MT	EPI_ISL_18567985	Australia	2023-11-08	BA.2.86*	BA.2	BA.2	0	0.05	2	77	81.0526	2.10526
hCoV-19/USA/OH-ODH-SC3033535/2023	FG|JN.1.1|EPI_ISL_18604177|2023-11-22|USA	FG	EPI_ISL_18604177	USA	2023-11-22	Others	JN.1.1	JN.1.1	0	0.05	28	96	101.053	29.4737
hCoV-19/Italy/VEN-IZSVe-23RS8243-9_PD/2023	MT|BA.2|EPI_ISL_18613066|2023-11-29|Italy	MT	EPI_ISL_18613066	Italy	2023-11-29	JN.1*	BA.2	XBB.1.9	0	0.05	12	85	89.4737	12.6316
hCoV-19/Australia/NSW-ICPMR-51945/2023	FG|JN.1.1|EPI_ISL_18633491|2023-12-03|Australia	FG	EPI_ISL_18633491	Australia	2023-12-03	JN.1*	JN.1.1	JN.1.1	0	0.05	28	87	91.5789	29.4737
hCoV-19/England/CLIMB-CM7YKHGU/2023	MT|BA.2|EPI_ISL_18641604|2023-12-06|England	MT	EPI_ISL_18641604	England	2023-12-06	JN.1*	BA.2	BA.2	0	0.05	12	68	71.5789	12.6316
hCoV-19/Poland/PZH-NIZP-OBSERCO_097/2023	MT|BA.2|EPI_ISL_18659873|2023-11-27|Poland	MT	EPI_ISL_18659873	Poland	2023-11-27	JN.1*	BA.2	BA.2	0	0.05	14	80	84.2105	14.7368
hCoV-19/France/CVL-ChuTo-9800122005/2023	FG|JN.2|EPI_ISL_18662129|2023-11-28|France	FG	EPI_ISL_18662129	France	2023-11-28	JN.1*	JN.2	JN.2	0	0.05	15	67	70.5263	15.7895
hCoV-19/South Africa/NICD-N57054/2023	FG|BA.2.86|EPI_ISL_18669172|2023-11-05|South Africa	FG	EPI_ISL_18669172	South Africa	2023-11-05	BA.2.86*	BA.2.86	BA.2.86	0	0.05	24	82	86.3158	25.2632
hCoV-19/Netherlands/NB-MVD-2300829/2023	FG|JN.1|EPI_ISL_18673739|2023-12-10|Netherlands	FG	EPI_ISL_18673739	Netherlands	2023-12-10	JN.1*	JN.1	JN.1	0	0.05	21	86	90.5263	22.1053
hCoV-19/Russia/SPE-RII-MH157776S/2023	FG|JN.3|EPI_ISL_18686183|2023-12-11|Russia	FG	EPI_ISL_18686183	Russia	2023-12-11	JN.1*	JN.3	JN.3	0	0.05	30	97	102.105	31.5789
hCoV-19/Puerto Rico/PR-PRPHL-MB0831/2023	FG|JN.1|EPI_ISL_18689139|2023-11-28|Puerto_Rico	FG	EPI_ISL_18689139	Puerto_Rico	2023-11-28	JN.1*	JN.1.8	JN.1.8	0	0.05	23	84	88.4211	24.2105
hCoV-19/Australia/SA1134085/2023	FG|JN.1.1|EPI_ISL_18693797|2023-12-15|Australia	FG	EPI_ISL_18693797	Australia	2023-12-15	JN.1*	JN.1.1	JN.1.1	0	0.05	30	100	105.263	31.5789
hCoV-19/India/GJ-INSACOG-GBRC13663/2023	FG|JN.1.1|EPI_ISL_18694678|2023-12-19|India	FG	EPI_ISL_18694678	India	2023-12-19	JN.1*	JN.1.1	JN.1.1	0	0.05	17	59	62.1053	17.8947
hCoV-19/Morocco/IPM20436131/2023	MT|BA.2|EPI_ISL_18702172|2023-08-30|Morocco	MT	EPI_ISL_18702172	Morocco	2023-08-30	JN.1*	BA.2	BA.2	0.5	0.05	4	51	53.6842	4.21053
hCoV-19/Ireland/D-BH-270101231/2023	FG|JN.1.2|EPI_ISL_18717975|2023-12-20|Ireland	FG	EPI_ISL_18717975	Ireland	2023-12-20	JN.1*	JN.1.2	JN.1.2	0	0.05	29	98	103.158	30.5263
hCoV-19/India/MH_BJCOG_INSACOG_6079/2023	MT|BA.2|EPI_ISL_18718934|2023-12-22|India	MT	EPI_ISL_18718934	India	2023-12-22	JN.1*	BA.2	BA.2	0	0.05	16	76	80	16.8421
hCoV-19/USA/IL-C23WGS3728/2023	MT|BA.2|EPI_ISL_18742667|2023-12-19|USA	MT	EPI_ISL_18742667	USA	2023-12-19	BA.2	BA.2	BA.2	0	0.05	21	84	88.4211	22.1053
hCoV-19/USA/TX-HMH-M-136956/2023	MT|BA.2|EPI_ISL_18743073|2023-12-27|USA	MT	EPI_ISL_18743073	USA	2023-12-27	BA.2	BA.2	BA.2	0	0.05	13	79	83.1579	13.6842
hCoV-19/USA/TX-HMH-M-136931/2023	MT|BA.2|EPI_ISL_18743097|2023-12-28|USA	MT	EPI_ISL_18743097	USA	2023-12-28	BA.2	BA.2	BA.2	0	0.05	15	71	74.7368	15.7895
hCoV-19/USA/TX-HMH-M-136584/2023	MT|BA.2|EPI_ISL_18743470|2023-12-20|USA	MT	EPI_ISL_18743470	USA	2023-12-20	BA.2	BA.2	BA.2	0	0.05	9	73	76.8421	9.47368
hCoV-19/USA/TX-HMH-M-136559/2023	MT|BA.2|EPI_ISL_18743493|2023-12-19|USA	MT	EPI_ISL_18743493	USA	2023-12-19	BA.2	BA.2	BA.2	0	0.05	10	77	81.0526	10.5263
hCoV-19/USA/TX-HMH-M-136484/2023	MT|BA.2|EPI_ISL_18743562|2023-12-16|USA	MT	EPI_ISL_18743562	USA	2023-12-16	BA.2	BA.2	BA.2	0	0.05	7	68	71.5789	7.36842
hCoV-19/USA/TX-HMH-M-136733/2023	MT|BA.2|EPI_ISL_18743617|2023-12-22|USA	MT	EPI_ISL_18743617	USA	2023-12-22	BA.2	BA.2	BA.2	0	0.05	13	73	76.8421	13.6842
hCoV-19/Italy/LOM_Niguarda_80354177LAF/2024	MT|BA.2|EPI_ISL_18792827|2024-01-04|Italy	MT	EPI_ISL_18792827	Italy	2024-01-04	BA.2	BA.2	BA.2	0	0.05	10	70	73.6842	10.5263
hCoV-19/England/CLIMB-CM7YGAI8/2024	MT|BA.2|EPI_ISL_18809900|2024-01-11|England	MT	EPI_ISL_18809900	England	2024-01-11	BA.2	BA.2	BA.2	0	0.05	11	77	81.0526	11.5789
hCoV-19/Italy/LOM_Niguarda_5800164598TAS/2024	MT|BA.2|EPI_ISL_18820147|2024-01-17|Italy	MT	EPI_ISL_18820147	Italy	2024-01-17	BA.2	BA.2	BA.2	0	0.05	15	73	76.8421	15.7895
hCoV-19/Italy/LOM_Niguarda_37366834PAR/2024	MT|BA.2|EPI_ISL_18820149|2024-01-17|Italy	MT	EPI_ISL_18820149	Italy	2024-01-17	BA.2	BA.2	BA.2	0	0.05	7	61	64.2105	7.36842
hCoV-19/Italy/LOM_Niguarda_37366564GJE/2024	MT|BA.2|EPI_ISL_18820150|2024-01-17|Italy	MT	EPI_ISL_18820150	Italy	2024-01-17	BA.2	BA.2	BA.2	0	0.05	18	77	81.0526	18.9474
hCoV-19/Italy/LOM_Niguarda_56089865PIT/2024	MT|BA.2|EPI_ISL_18820157|2024-01-12|Italy	MT	EPI_ISL_18820157	Italy	2024-01-12	BA.2	BA.2	BA.2	0	0.05	8	65	68.4211	8.42105
hCoV-19/Mauritius/95113/2023	MT|BA.2|EPI_ISL_18863034|2023-12-01|Mauritius	MT	EPI_ISL_18863034	Mauritius	2023-12-01	Others	BA.2	BA.2	0	0.05	18	72	75.7895	18.9474
hCoV-19/USA/IL-C24WGS192/2024	MT|BA.2|EPI_ISL_18872574|2024-01-08|USA	MT	EPI_ISL_18872574	USA	2024-01-08	BA.2	BA.2	BA.2	0	0.05	21	88	92.6316	22.1053
hCoV-19/USA/IL-C24WGS203/2024	MT|BA.2|EPI_ISL_18872585|2024-01-11|USA	MT	EPI_ISL_18872585	USA	2024-01-11	BA.2	BA.2	BA.2	0	0.05	20	76	80	21.0526
hCoV-19/USA/IL-C24WGS219/2024	MT|BA.2|EPI_ISL_18872601|2024-01-22|USA	MT	EPI_ISL_18872601	USA	2024-01-22	BA.2	BA.2	BA.2	0	0.05	19	83	87.3684	20
hCoV-19/USA/CA-LACPHL-AY05199/2024	FG|JN.1|EPI_ISL_18887458|2022-03-26|USA	FG	EPI_ISL_18887458	USA	2024-01-03	BA.2	JN.1.39	JN.1	0	0.05	29	97	102.105	30.5263
hCoV-19/USA/CA-LACPHL-AY05199/2024	FG|JN.1|EPI_ISL_18887458|2022-03-26|USA	FG	EPI_ISL_18887458	USA	2024-01-03	JN.1	JN.1.39	JN.1	0	0.05	29	97	102.105	30.5263
hCoV-19/USA/CA-HLX-STM-SVWAYV77M/2024	MT|BA.2|EPI_ISL_18903606|2024-01-13|USA	MT	EPI_ISL_18903606	USA	2024-01-13	BA.2	BA.2	BA.2	0.5	0.05	11	55	57.8947	11.5789
hCoV-19/USA/CA-HLX-STM-SVWAYV77M/2024	MT|BA.2|EPI_ISL_18903606|2024-01-13|USA	MT	EPI_ISL_18903606	USA	2024-01-13	BA.2	BA.2	BA.2	0.5	0.05	11	55	57.8947	11.5789
hCoV-19/USA/TX-PHH-CS-03336/2023	FG|JN.1|EPI_ISL_18908911|2023-05-01|USA	FG	EPI_ISL_18908911	USA	2023-05-01	BA.2	JN.1	JN.1	0	0.05	24	78	82.1053	25.2632
hCoV-19/USA/TX-PHH-CS-03336/2023	FG|JN.1|EPI_ISL_18908911|2023-05-01|USA	FG	EPI_ISL_18908911	USA	2023-05-01	JN.1	JN.1	JN.1	0	0.05	24	78	82.1053	25.2632
hCoV-19/USA/CA-SEARCH-139467/2023	MT|BA.2|EPI_ISL_18912788|2023-12-13|USA	MT	EPI_ISL_18912788	USA	2023-12-13	BA.2	BA.2	BA.2	0	0.05	18	93	97.8947	18.9474
hCoV-19/USA/CA-SEARCH-139467/2023	MT|BA.2|EPI_ISL_18912788|2023-12-13|USA	MT	EPI_ISL_18912788	USA	2023-12-13	BA.2	BA.2	BA.2	0	0.05	18	93	97.8947	18.9474
hCoV-19/USA/TX-DSHS-26409/2023	FG|JN.1|EPI_ISL_18914466|2023-02-05|USA	FG	EPI_ISL_18914466	USA	2023-02-05	JN.1*	JN.1.34	JN.1	0	0.05	30	103	108.421	31.5789
hCoV-19/USA/TX-DSHS-26409/2023	FG|JN.1|EPI_ISL_18914466|2023-02-05|USA	FG	EPI_ISL_18914466	USA	2023-02-05	JN.1	JN.1.34	JN.1	0	0.05	30	103	108.421	31.5789
hCoV-19/Spain/IB-HUSE-03943/2022	MT|BA.2|EPI_ISL_9648257|2022-01-28|Spain	MT	EPI_ISL_9648257	Spain	2022-01-28	BA.2	BA.2	BA.2	0	0.05	1	54	56.8421	1.05263
hCoV-19/Spain/IB-HUSE-03943/2022	MT|BA.2|EPI_ISL_9648257|2022-01-28|Spain	MT	EPI_ISL_9648257	Spain	2022-01-28	BA.2	BA.2	BA.2	0	0.05	1	54	56.8421	1.05263
hCoV-19/India/TG-CDFD-33143/2022	MT|BA.2|EPI_ISL_9779435|2022-01-11|India	MT	EPI_ISL_9779435	India	2022-01-11	BA.2	BA.2	BA.2	0.5	0.05	0	56	58.9474	0
hCoV-19/India/TG-CDFD-33143/2022	MT|BA.2|EPI_ISL_9779435|2022-01-11|India	MT	EPI_ISL_9779435	India	2022-01-11	BA.2	BA.2	BA.2	0.5	0.05	0	56	58.9474	0
hCoV-19/India/TG-CDFD-NMCVD71507/2022	MT|BA.2|EPI_ISL_9779446|2022-01-16|India	MT	EPI_ISL_9779446	India	2022-01-16	BA.2	BA.2	BA.2	0.666667	0.05	0	56	58.9474	0
hCoV-19/India/TG-CDFD-NMCVD71507/2022	MT|BA.2|EPI_ISL_9779446|2022-01-16|India	MT	EPI_ISL_9779446	India	2022-01-16	BA.2	BA.2	BA.2	0.666667	0.05	0	56	58.9474	0
hCoV-19/Denmark/DCGC-379778/2022	MT|BA.2|EPI_ISL_10207204|2022-02-16|Denmark	MT	EPI_ISL_10207204	Denmark	2022-02-16	BA.2	BA.2	BA.2	0	0.04	0	53	55.2083	0
hCoV-19/India/MH-INSACOGIP10237/2022	MT|BA.2|EPI_ISL_10369398|2022-02-03|India	MT	EPI_ISL_10369398	India	2022-02-03	BA.2	BA.2	BA.2	0.5	0.04	1	51	53.125	1.04167
hCoV-19/Denmark/DCGC-380657/2022	MT|BA.2|EPI_ISL_10401727|2022-02-10|Denmark	MT	EPI_ISL_10401727	Denmark	2022-02-10	BA.2	BA.2	BA.2	0	0.04	1	57	59.375	1.04167
hCoV-19/India/RJ-SMS-ICMR-INSACOG-TS-10089/2022	MT|BA.2|EPI_ISL_10524189|2022-02-14|India	MT	EPI_ISL_10524189	India	2022-02-14	BA.2	BA.2	BA.2	0	0.04	0	42	43.75	0
hCoV-19/England/DHSC-CYYCRYA/2022	MT|BA.2|EPI_ISL_10670505|2022-02-17|England	MT	EPI_ISL_10670505	England	2022-02-17	BA.2	BA.2	BA.2	0.666667	0.04	0	59	61.4583	0
hCoV-19/India/RJ-SMS-ICMR-INSACOG-TS-9471/2022	MT|BA.2|EPI_ISL_10675584|2022-02-11|India	MT	EPI_ISL_10675584	India	2022-02-11	BA.2	BA.2	BA.2	0	0.04	0	59	61.4583	0
hCoV-19/England/MILK-38A2597/2022	MT|BA.2|EPI_ISL_10735941|2022-02-28|England	MT	EPI_ISL_10735941	England	2022-02-28	BA.2	BA.2	BA.2	0	0.04	0	63	65.625	0
hCoV-19/England/MILK-38A2500/2022	MT|BA.2|EPI_ISL_10736068|2022-02-28|England	MT	EPI_ISL_10736068	England	2022-02-28	BA.2	BA.2	BA.2	0	0.04	0	63	65.625	0
hCoV-19/Lithuania/S22B446/2022	MT|BA.2|EPI_ISL_10763297|2022-02-14|Lithuania	MT	EPI_ISL_10763297	Lithuania	2022-02-14	BA.2	BA.2	BA.2	0	0.04	0	59	61.4583	0
hCoV-19/Israel/ICH-741124458/2022	MT|BA.2|EPI_ISL_10816605|2022-02-28|Israel	MT	EPI_ISL_10816605	Israel	2022-02-28	BA.2	BA.2	BA.2	0	0.04	0	58	60.4167	0
hCoV-19/Germany/BW-RKI-I-587648/2022	MT|BA.2|EPI_ISL_10904602|2022-02-22|Germany	MT	EPI_ISL_10904602	Germany	2022-02-22	BA.2	BA.2	BA.2	0	0.04	0	51	53.125	0
hCoV-19/England/MILK-396930A/2022	MT|BA.2|EPI_ISL_10972841|2022-03-07|England	MT	EPI_ISL_10972841	England	2022-03-07	BA.2	BA.2	BA.2	0.333333	0.04	0	80	83.3333	0
hCoV-19/England/MILK-39B5DE3/2022	MT|BA.2|EPI_ISL_10990139|2022-03-08|England	MT	EPI_ISL_10990139	England	2022-03-08	BA.2	BA.2	BA.2	0	0.04	0	63	65.625	0
hCoV-19/England/LSPA-39D2542/2022	MT|BA.2|EPI_ISL_11032680|2022-03-09|England	MT	EPI_ISL_11032680	England	2022-03-09	BA.2	BA.2	BA.2	0	0.04	1	60	62.5	1.04167
hCoV-19/England/NEWC-3A50DBC/2022	MT|BA.2|EPI_ISL_11184238|2022-03-11|England	MT	EPI_ISL_11184238	England	2022-03-11	BA.2	BA.2	BA.2	0	0.04	0	56	58.3333	0
hCoV-19/England/BRBR-3A6F330/2022	MT|BA.2|EPI_ISL_11186321|2022-03-12|England	MT	EPI_ISL_11186321	England	2022-03-12	BA.2	BA.2	BA.2	0	0.04	0	58	60.4167	0
hCoV-19/England/BRBR-3A9D551/2022	MT|BA.2|EPI_ISL_11195035|2022-03-14|England	MT	EPI_ISL_11195035	England	2022-03-14	BA.2	BA.2	BA.2	0	0.04	0	57	59.375	0
hCoV-19/England/LSPA-3A96CBD/2022	MT|BA.2|EPI_ISL_11195584|2022-03-13|England	MT	EPI_ISL_11195584	England	2022-03-13	BA.2	BA.2	BA.2	0	0.04	1	61	63.5417	1.04167
hCoV-19/France/IDF-SLS-762202059490/2022	MT|BA.2|EPI_ISL_11223456|2022-02-17|France	MT	EPI_ISL_11223456	France	2022-02-17	BA.2	BA.2	BA.2	0	0.04	1	49	51.0417	1.04167
hCoV-19/Croatia/32006/2022	MT|BA.2|EPI_ISL_11268627|2022-02-20|Croatia	MT	EPI_ISL_11268627	Croatia	2022-02-20	BA.2	BA.2	BA.2	0.5	0.04	0	57	59.375	0
hCoV-19/South Africa/NICD-N35869/2022	MT|BA.2|EPI_ISL_11270295|2022-02-21|South_Africa	MT	EPI_ISL_11270295	South_Africa	2022-02-21	BA.2	BA.2	BA.2	0	0.04	0	56	58.3333	0
hCoV-19/England/PLYM-3B1268D/2022	MT|BA.2|EPI_ISL_11303789|2022-03-16|England	MT	EPI_ISL_11303789	England	2022-03-16	BA.2	BA.2	BA.2	0	0.04	0	58	60.4167	0
hCoV-19/England/PLYM-3B1267E/2022	MT|BA.2|EPI_ISL_11303807|2022-03-15|England	MT	EPI_ISL_11303807	England	2022-03-15	BA.2	BA.2	BA.2	0	0.04	0	58	60.4167	0
hCoV-19/England/LSPA-3B341FD/2022	MT|BA.2|EPI_ISL_11335537|2022-03-17|England	MT	EPI_ISL_11335537	England	2022-03-17	BA.2	BA.2	BA.2	0	0.04	0	60	62.5	0
hCoV-19/England/MILK-3B38A67/2022	MT|BA.2|EPI_ISL_11336620|2022-03-18|England	MT	EPI_ISL_11336620	England	2022-03-18	BA.2	BA.2	BA.2	0	0.04	0	57	59.375	0
hCoV-19/Denmark/DCGC-444928/2022	MT|BA.2|EPI_ISL_11381677|2022-03-08|Denmark	MT	EPI_ISL_11381677	Denmark	2022-03-08	BA.2	BA.2	BA.2	0	0.04	0	54	56.25	0
hCoV-19/USA/VT-Broad-CRSP_QULMPGO7TYKX6PUS/2022	MT|BA.2|EPI_ISL_11388905|2022-03-04|USA	MT	EPI_ISL_11388905	USA	2022-03-04	BA.2	BA.2	BA.2	0	0.04	1	50	52.0833	1.04167
hCoV-19/South Korea/KDCA33054/2022	MT|BA.2|EPI_ISL_11405688|2022-02-28|South_Korea	MT	EPI_ISL_11405688	South_Korea	2022-02-28	BA.2	BA.2	BA.2	0.5	0.04	1	60	62.5	1.04167
hCoV-19/England/MILK-3BEFEAF/2022	MT|BA.2|EPI_ISL_11508651|2022-03-22|England	MT	EPI_ISL_11508651	England	2022-03-22	BA.2	BA.2	BA.2	0	0.04	0	63	65.625	0
hCoV-19/Canada/QC-L00447269001/2022	MT|BA.2|EPI_ISL_11565401|2022-02-24|Canada	MT	EPI_ISL_11565401	Canada	2022-02-24	BA.2	BA.2	BA.2	0	0.04	0	61	63.5417	0
hCoV-19/England/LSPA-3C4628B/2022	MT|BA.2|EPI_ISL_11590471|2022-03-25|England	MT	EPI_ISL_11590471	England	2022-03-25	BA.2	BA.2	BA.2	0	0.04	0	57	59.375	0
hCoV-19/England/PLYM-3C2564A/2022	MT|BA.2|EPI_ISL_11654083|2022-03-23|England	MT	EPI_ISL_11654083	England	2022-03-23	BA.2	BA.2	BA.2	0	0.04	0	58	60.4167	0
hCoV-19/Germany/NW-RKI-I-679890/2022	MT|BA.2|EPI_ISL_11666310|2022-03-18|Germany	MT	EPI_ISL_11666310	Germany	2022-03-18	BA.2	BA.2	BA.2	0	0.04	1	51	53.125	1.04167
hCoV-19/England/LSPA-3CD1EEB/2022	MT|BA.2|EPI_ISL_11726241|2022-03-28|England	MT	EPI_ISL_11726241	England	2022-03-28	BA.2	BA.2	BA.2	0	0.04	0	60	62.5	0
hCoV-19/Wales/PHWC-PJOBHN/2022	MT|BA.2|EPI_ISL_11836208|2022-03-20|Wales	MT	EPI_ISL_11836208	Wales	2022-03-20	BA.2	BA.2	BA.2	0	0.04	0	57	59.375	0
hCoV-19/Belgium/ZNA_25281095/2022	MT|BA.2|EPI_ISL_11839588|2022-03-21|Belgium	MT	EPI_ISL_11839588	Belgium	2022-03-21	BA.2	BA.2	BA.2	0	0.04	0	53	55.2083	0
hCoV-19/Belgium/ZNA_25281096/2022	MT|BA.2|EPI_ISL_11839589|2022-03-21|Belgium	MT	EPI_ISL_11839589	Belgium	2022-03-21	BA.2	BA.2	BA.2	0	0.04	0	53	55.2083	0
hCoV-19/Slovakia/BA_22_00022794/2022	MT|BA.2|EPI_ISL_11906318|2022-03-29|Slovakia	MT	EPI_ISL_11906318	Slovakia	2022-03-29	BA.2	BA.2	BA.2	0.4	0.04	0	52	54.1667	0
hCoV-19/England/PHEP-YYRIU7D/2022	MT|BA.2|EPI_ISL_11960167|2022-03-18|England	MT	EPI_ISL_11960167	England	2022-03-18	BA.2	BA.2	BA.2	0	0.04	0	63	65.625	0
hCoV-19/Israel/ICH-741211614/2022	MT|BA.2|EPI_ISL_11969864|2022-03-26|Israel	MT	EPI_ISL_11969864	Israel	2022-03-26	BA.2	BA.2	BA.2	0	0.04	0	60	62.5	0
hCoV-19/England/PHEC-YYR8IKF/2022	MT|BA.2|EPI_ISL_12076034|2022-03-28|England	MT	EPI_ISL_12076034	England	2022-03-28	BA.2	BA.2	BA.2	0	0.04	0	65	67.7083	0
hCoV-19/France/GES-HMN-22032240697/2022	MT|BA.2|EPI_ISL_12083163|2022-03-21|France	MT	EPI_ISL_12083163	France	2022-03-21	BA.2	BA.2	BA.2	0	0.04	0	53	55.2083	0
hCoV-19/Israel/CVL-8011478/2022	MT|BA.2|EPI_ISL_12094982|2022-03-10|Israel	MT	EPI_ISL_12094982	Israel	2022-03-10	BA.2	BA.2	BA.2	0	0.04	1	57	59.375	1.04167
hCoV-19/Wales/PHWC-PJIX9R/2022	MT|BA.2|EPI_ISL_12108361|2022-03-29|Wales	MT	EPI_ISL_12108361	Wales	2022-03-29	BA.2	BA.2	BA.2	0	0.04	1	62	64.5833	1.04167
hCoV-19/Italy/VEN-IZSVe-22RS8132-9_VR/2022	MT|BA.2|EPI_ISL_12131987|2022-04-06|Italy	MT	EPI_ISL_12131987	Italy	2022-04-06	BA.2	BA.2	BA.2	0	0.04	1	61	63.5417	1.04167
hCoV-19/Germany/ST-MD7301/2022	MT|BA.2|EPI_ISL_12153320|2022-02-25|Germany	MT	EPI_ISL_12153320	Germany	2022-02-25	BA.2	BA.2	BA.2	0	0.04	1	52	54.1667	1.04167
hCoV-19/Germany/NW-RKI-I-718836/2022	MT|BA.2|EPI_ISL_12187951|2022-04-01|Germany	MT	EPI_ISL_12187951	Germany	2022-04-01	BA.2	BA.2	BA.2	0	0.04	0	49	51.0417	0
hCoV-19/Germany/SH-RKI-I-727560/2022	MT|BA.2|EPI_ISL_12197153|2022-04-12|Germany	MT	EPI_ISL_12197153	Germany	2022-04-12	BA.2	BA.2	BA.2	0	0.04	0	49	51.0417	0
hCoV-19/India/KA-RFNB-7558/2022	MT|BA.2|EPI_ISL_12227284|2022-04|India	MT	EPI_ISL_12227284	India	2022-04	BA.2	BA.2	BA.2	0.666667	0.04	1	53	55.2083	1.04167
hCoV-19/Sweden/3696883963/2022	MT|BA.2|EPI_ISL_12265648|2022-04-07|Sweden	MT	EPI_ISL_12265648	Sweden	2022-04-07	BA.2	BA.2	BA.2	0	0.04	0	56	58.3333	0
hCoV-19/USA/DE-Curative-215550/2022	MT|BA.2|EPI_ISL_12277642|2022-04-11|USA	MT	EPI_ISL_12277642	USA	2022-04-11	BA.2	BA.2	BA.2	0.5	0.04	1	47	48.9583	1.04167
hCoV-19/Scotland/QEUH-3D91411/2022	MT|BA.2|EPI_ISL_12281852|2022-04-19|Scotland	MT	EPI_ISL_12281852	Scotland	2022-04-19	BA.2	BA.2	BA.2	0	0.04	0	58	60.4167	0
hCoV-19/Germany/NW-RKI-I-752327/2022	MT|BA.2|EPI_ISL_12363815|2022-03-16|Germany	MT	EPI_ISL_12363815	Germany	2022-03-16	BA.2	BA.2	BA.2	0	0.04	1	58	60.4167	1.04167
hCoV-19/Germany/HH-RKI-I-753534/2022	MT|BA.2|EPI_ISL_12365034|2022-03-31|Germany	MT	EPI_ISL_12365034	Germany	2022-03-31	BA.2	BA.2	BA.2	0.4	0.04	0	48	50	0
hCoV-19/Germany/SH-RKI-I-756984/2022	MT|BA.2|EPI_ISL_12368247|2022-04-20|Germany	MT	EPI_ISL_12368247	Germany	2022-04-20	BA.2	BA.2	BA.2	0	0.04	1	53	55.2083	1.04167
hCoV-19/Australia/VIC53207/2022	MT|BA.2|EPI_ISL_12391627|2022-04-12|Australia	MT	EPI_ISL_12391627	Australia	2022-04-12	BA.2	BA.2	BA.2	0	0.04	0	59	61.4583	0
hCoV-19/England/PHEC-YYR3MPR/2022	MT|BA.2|EPI_ISL_12403275|2022-04-15|England	MT	EPI_ISL_12403275	England	2022-04-15	BA.2	BA.2	BA.2	0	0.04	1	63	65.625	1.04167
hCoV-19/Wales/PHWC-PJAEAU/2022	MT|BA.2|EPI_ISL_12407825|2022-04-02|Wales	MT	EPI_ISL_12407825	Wales	2022-04-02	BA.2	BA.2	BA.2	0	0.04	0	61	63.5417	0
hCoV-19/France/PAC-HMN-22042040541/2022	MT|BA.2|EPI_ISL_12422279|2022-03-21|France	MT	EPI_ISL_12422279	France	2022-03-21	BA.2	BA.2	BA.2	0	0.04	1	52	54.1667	1.04167
hCoV-19/Australia/ACT5055/2022	MT|BA.2|EPI_ISL_12434379|2022-04-10|Australia	MT	EPI_ISL_12434379	Australia	2022-04-10	BA.2	BA.2	BA.2	0.25	0.04	0	59	61.4583	0
hCoV-19/Luxembourg/LNS9624940/2022	MT|BA.2|EPI_ISL_12441173|2022-04-19|Luxembourg	MT	EPI_ISL_12441173	Luxembourg	2022-04-19	BA.2	BA.2	BA.2	0	0.04	0	50	52.0833	0
hCoV-19/USA/NY-PRL-0425_01K17/2022	MT|BA.2|EPI_ISL_12462340|2022-04-22|USA	MT	EPI_ISL_12462340	USA	2022-04-22	BA.2	BA.2	BA.2	0	0.04	0	59	61.4583	0
hCoV-19/Austria/LB-R00072-S155/2022	MT|BA.2|EPI_ISL_12471955|2022-04-25|Austria	MT	EPI_ISL_12471955	Austria	2022-04-25	BA.2	BA.2	BA.2	0	0.04	0	52	54.1667	0
hCoV-19/Denmark/DCGC-504951/2022	MT|BA.2|EPI_ISL_12473268|2022-04-15|Denmark	MT	EPI_ISL_12473268	Denmark	2022-04-15	BA.2	BA.2	BA.2	0	0.04	0	59	61.4583	0
hCoV-19/Germany/SH-RKI-I-776050/2022	MT|BA.2|EPI_ISL_12529190|2022-04-29|Germany	MT	EPI_ISL_12529190	Germany	2022-04-29	BA.2	BA.2	BA.2	0	0.04	0	51	53.125	0
hCoV-19/England/PHEC-YYFYPZ9/2022	MT|BA.2|EPI_ISL_12583624|2022-04-14|England	MT	EPI_ISL_12583624	England	2022-04-14	BA.2	BA.2	BA.2	0	0.04	1	62	64.5833	1.04167
hCoV-19/Slovakia/BA_22_00027777/2022	MT|BA.2|EPI_ISL_12620253|2022-04-18|Slovakia	MT	EPI_ISL_12620253	Slovakia	2022-04-18	BA.2	BA.2	BA.2	0	0.04	0	56	58.3333	0
hCoV-19/Israel/ICH-741222674/2022	MT|BA.2|EPI_ISL_12633074|2022-04-30|Israel	MT	EPI_ISL_12633074	Israel	2022-04-30	BA.2	BA.2	BA.2	0	0.04	0	66	68.75	0
hCoV-19/Israel/ICH-741222796/2022	MT|BA.2|EPI_ISL_12637242|2022-04-29|Israel	MT	EPI_ISL_12637242	Israel	2022-04-29	BA.2	BA.2	BA.2	0	0.04	0	57	59.375	0
hCoV-19/Germany/BY-RKI-I-788570/2022	MT|BA.2|EPI_ISL_12677677|2022-05-03|Germany	MT	EPI_ISL_12677677	Germany	2022-05-03	BA.2	BA.2	BA.2	0	0.04	1	55	57.2917	1.04167
hCoV-19/France/NOR-HMN-22042251213/2022	MT|BA.2|EPI_ISL_12685902|2022-03-21|France	MT	EPI_ISL_12685902	France	2022-03-21	BA.2	BA.2	BA.2	0	0.04	0	51	53.125	0
hCoV-19/USA/NY-PRL-2022_0509_02J09/2022	MT|BA.2|EPI_ISL_12708467|2022-05-05|USA	MT	EPI_ISL_12708467	USA	2022-05-05	BA.2	BA.2	BA.2	0	0.04	0	58	60.4167	0
hCoV-19/England/QEUH-3E01369/2022	MT|BA.2|EPI_ISL_12724473|2022-05-05|England	MT	EPI_ISL_12724473	England	2022-05-05	BA.2	BA.2	BA.2	0.333333	0.04	0	58	60.4167	0
hCoV-19/Germany/NW-RKI-I-791497/2022	MT|BA.2|EPI_ISL_12730011|2022-05-05|Germany	MT	EPI_ISL_12730011	Germany	2022-05-05	BA.2	BA.2	BA.2	0	0.04	1	52	54.1667	1.04167
hCoV-19/Chile/RM-39366/2022	MT|BA.2|EPI_ISL_12740155|2022-03-17|Chile	MT	EPI_ISL_12740155	Chile	2022-03-17	BA.2	BA.2	BA.2	0	0.04	0	53	55.2083	0
hCoV-19/Ireland/D-NVRL-ecS22IRL00287121/2022	MT|BA.2|EPI_ISL_12743138|2022-04-04|Ireland	MT	EPI_ISL_12743138	Ireland	2022-04-04	BA.2	BA.2	BA.2	0	0.04	0	54	56.25	0
hCoV-19/USA/NY-CDC-LC0620249/2022	MT|BA.2|EPI_ISL_12764097|2022-05-05|USA	MT	EPI_ISL_12764097	USA	2022-05-05	BA.2	BA.2	BA.2	0	0.04	1	58	60.4167	1.04167
hCoV-19/England/QEUH-3CEB3C1/2022	MT|BA.2|EPI_ISL_12775517|2022-03-24|England	MT	EPI_ISL_12775517	England	2022-03-24	BA.2	BA.2	BA.2	0	0.04	1	59	61.4583	1.04167
hCoV-19/France/BFC-HMN-22052030083/2022	MT|BA.2|EPI_ISL_12787619|2022-04-25|France	MT	EPI_ISL_12787619	France	2022-04-25	BA.2	BA.2	BA.2	0	0.04	0	50	52.0833	0
hCoV-19/Australia/VIC55096/2022	MT|BA.2|EPI_ISL_12849358|2022-04-27|Australia	MT	EPI_ISL_12849358	Australia	2022-04-27	BA.2	BA.2	BA.2	0	0.04	1	58	60.4167	1.04167
hCoV-19/Australia/VIC57623/2022	MT|BA.2|EPI_ISL_12850054|2022-05-03|Australia	MT	EPI_ISL_12850054	Australia	2022-05-03	BA.2	BA.2	BA.2	0	0.04	0	58	60.4167	0
hCoV-19/Czech Republic/KNL_050120159/2022	MT|BA.2|EPI_ISL_12871842|2022-05-16|Czech_Republic	MT	EPI_ISL_12871842	Czech_Republic	2022-05-16	BA.2	BA.2	BA.2	0	0.04	0	72	75	0
hCoV-19/India/KA-RFNB-7903/2022	MT|BA.2|EPI_ISL_12872192|2022-05|India	MT	EPI_ISL_12872192	India	2022-05	BA.2	BA.2	BA.2	0.5	0.04	0	58	60.4167	0
hCoV-19/Slovakia/TN_22_00001510/2022	MT|BA.2|EPI_ISL_12872762|2022-05-06|Slovakia	MT	EPI_ISL_12872762	Slovakia	2022-05-06	BA.2	BA.2	BA.2	0	0.04	1	50	52.0833	1.04167
hCoV-19/France/CVL-HCL722002732902/2022	MT|BA.2|EPI_ISL_12893021|2022-05-09|France	MT	EPI_ISL_12893021	France	2022-05-09	BA.2	BA.2	BA.2	0.5	0.04	0	58	60.4167	0
hCoV-19/Mauritius/CERI-KRISP-K042715/2022	MT|BA.2|EPI_ISL_12952766|2022-04-23|Mauritius	MT	EPI_ISL_12952766	Mauritius	2022-04-23	BA.2	BA.2	BA.2	0	0.04	1	61	63.5417	1.04167
hCoV-19/England/PHEC-YYFK3NK/2022	MT|BA.2|EPI_ISL_12999546|2022-05-12|England	MT	EPI_ISL_12999546	England	2022-05-12	BA.2	BA.2	BA.2	0.5	0.04	0	64	66.6667	0
hCoV-19/Belgium/UGent-3274/2022	MT|BA.2|EPI_ISL_13051557|2022-04-20|Belgium	MT	EPI_ISL_13051557	Belgium	2022-04-20	BA.2	BA.2	BA.2	0.333333	0.04	1	67	69.7917	1.04167
hCoV-19/Israel/SMC-7069896/2022	MT|BA.2|EPI_ISL_13109976|2022-05-11|Israel	MT	EPI_ISL_13109976	Israel	2022-05-11	BA.2	BA.2	BA.2	0	0.04	1	50	52.0833	1.04167
hCoV-19/England/PHEC-YYFPJP6/2022	MT|BA.2|EPI_ISL_13131467|2022-05-26|England	MT	EPI_ISL_13131467	England	2022-05-26	BA.2	BA.2	BA.2	0	0.04	0	52	54.1667	0
hCoV-19/Germany/SN-RKI-I-839152/2022	MT|BA.2|EPI_ISL_13141515|2022-03-01|Germany	MT	EPI_ISL_13141515	Germany	2022-03-01	BA.2	BA.2	BA.2	0	0.04	0	50	52.0833	0
hCoV-19/Poland/WSSEGDA-1468/2022	MT|BA.2|EPI_ISL_13180930|2022-06-06|Poland	MT	EPI_ISL_13180930	Poland	2022-06-06	BA.2	BA.2	BA.2	0	0.04	1	50	52.0833	1.04167
hCoV-19/Sweden/2A67457630099/2022	MT|BA.2|EPI_ISL_13185339|2022-05-04|Sweden	MT	EPI_ISL_13185339	Sweden	2022-05-04	BA.2	BA.2	BA.2	0	0.04	1	47	48.9583	1.04167
hCoV-19/South Korea/KDCA67083/2022	MT|BA.2|EPI_ISL_13200977|2022-05-24|South_Korea	MT	EPI_ISL_13200977	South_Korea	2022-05-24	BA.2	BA.2	BA.2	0	0.04	1	58	60.4167	1.04167
hCoV-19/Germany/SN-RKI-I-842214/2022	MT|BA.2|EPI_ISL_13235920|2022-05-30|Germany	MT	EPI_ISL_13235920	Germany	2022-05-30	BA.2	BA.2	BA.2	0	0.04	1	57	59.375	1.04167
hCoV-19/Germany/NW-RKI-I-849262/2022	MT|BA.2|EPI_ISL_13244671|2022-06-01|Germany	MT	EPI_ISL_13244671	Germany	2022-06-01	BA.2	BA.2	BA.2	0.5	0.04	1	44	45.8333	1.04167
hCoV-19/Spain/PV-HUD-74324841/2022	MT|BA.2|EPI_ISL_13252166|2022-05-16|Spain	MT	EPI_ISL_13252166	Spain	2022-05-16	BA.2	BA.2	BA.2	0.333333	0.04	0	51	53.125	0
hCoV-19/Germany/NW-RKI-I-860523/2022	MT|BA.2|EPI_ISL_13268542|2022-03-22|Germany	MT	EPI_ISL_13268542	Germany	2022-03-22	BA.2	BA.2	BA.2	0	0.04	0	51	53.125	0
hCoV-19/USA/TX-HMH-MCoV-99564/2022	MT|BA.2|EPI_ISL_13270130|2022-06-05|USA	MT	EPI_ISL_13270130	USA	2022-06-05	BA.2	BA.2	BA.2	0.5	0.04	1	61	63.5417	1.04167
hCoV-19/Australia/VIC61267/2022	MT|BA.2|EPI_ISL_13276139|2022-05-27|Australia	MT	EPI_ISL_13276139	Australia	2022-05-27	BA.2	BA.2	BA.2	0	0.04	1	58	60.4167	1.04167
hCoV-19/Austria/LB-R00081-S104/2022	MT|BA.2|EPI_ISL_13281273|2022-06-06|Austria	MT	EPI_ISL_13281273	Austria	2022-06-06	BA.2	BA.2	BA.2	0	0.04	0	53	55.2083	0
hCoV-19/Spain/MD-HULP-061077804/2022	MT|BA.2|EPI_ISL_13283228|2022-04-20|Spain	MT	EPI_ISL_13283228	Spain	2022-04-20	BA.2	BA.2	BA.2	0	0.04	1	62	64.5833	1.04167
hCoV-19/India/MH-KasturbaMCGM-ICMR-INSACOG-WG3853/2022	MT|BA.2|EPI_ISL_13306932|2022-05-13|India	MT	EPI_ISL_13306932	India	2022-05-13	BA.2	BA.2	BA.2	0	0.04	0	50	52.0833	0
hCoV-19/Australia/QLD0x00F237/2022	MT|BA.2|EPI_ISL_13322223|2022-06-07|Australia	MT	EPI_ISL_13322223	Australia	2022-06-07	BA.2	BA.2	BA.2	0	0.04	1	64	66.6667	1.04167
hCoV-19/France/ARA-HMN-22052230412/2022	MT|BA.2|EPI_ISL_13330554|2022-04-25|France	MT	EPI_ISL_13330554	France	2022-04-25	BA.2	BA.2	BA.2	0	0.04	1	52	54.1667	1.04167
hCoV-19/France/PDL-HMN-22052111056/2022	MT|BA.2|EPI_ISL_13349920|2022-03-21|France	MT	EPI_ISL_13349920	France	2022-03-21	BA.2	BA.2	BA.2	0	0.04	1	52	54.1667	1.04167
hCoV-19/France/HDF-IPP38152/2022	MT|BA.2|EPI_ISL_13362913|2022-05-30|France	MT	EPI_ISL_13362913	France	2022-05-30	BA.2	BA.2	BA.2	0.333333	0.04	0	59	61.4583	0
hCoV-19/Germany/NW-RKI-I-870409/2022	MT|BA.2|EPI_ISL_13383502|2022-06-09|Germany	MT	EPI_ISL_13383502	Germany	2022-06-09	BA.2	BA.2	BA.2	0	0.04	0	51	53.125	0
hCoV-19/New Zealand/22CV5746/2022	MT|BA.2|EPI_ISL_13438857|2022-06-11|New_Zealand	MT	EPI_ISL_13438857	New_Zealand	2022-06-11	BA.2	BA.2	BA.2	0	0.04	0	54	56.25	0
hCoV-19/Australia/VIC62745/2022	MT|BA.2|EPI_ISL_13458085|2022-06-03|Australia	MT	EPI_ISL_13458085	Australia	2022-06-03	BA.2	BA.2	BA.2	0.666667	0.04	1	62	64.5833	1.04167
hCoV-19/Australia/VIC63294/2022	MT|BA.2|EPI_ISL_13458368|2022-06-02|Australia	MT	EPI_ISL_13458368	Australia	2022-06-02	BA.2	BA.2	BA.2	0	0.04	0	61	63.5417	0
hCoV-19/Latvia/2202022819/2022	MT|BA.2|EPI_ISL_13630532|2022-02-07|Latvia	MT	EPI_ISL_13630532	Latvia	2022-02-07	BA.2	BA.2	BA.2	0	0.04	0	58	60.4167	0
hCoV-19/India/GJ-INSACOG-GBRC7238/2022	MT|BA.2|EPI_ISL_13697055|2022-05-10|India	MT	EPI_ISL_13697055	India	2022-05-10	BA.2	BA.2	BA.2	0	0.04	0	40	41.6667	0
hCoV-19/England/QEUH-3D1C34E/2022	MT|BA.2|EPI_ISL_13712610|2022-04-04|England	MT	EPI_ISL_13712610	England	2022-04-04	BA.2	BA.2	BA.2	0	0.04	1	57	59.375	1.04167
hCoV-19/New Zealand/22CH5517/2022	MT|BA.2|EPI_ISL_13765233|2022-06-26|New_Zealand	MT	EPI_ISL_13765233	New_Zealand	2022-06-26	BA.2	BA.2	BA.2	0	0.04	0	61	63.5417	0
hCoV-19/New Zealand/22CH5881/2022	MT|BA.2|EPI_ISL_13765234|2022-07-02|New_Zealand	MT	EPI_ISL_13765234	New_Zealand	2022-07-02	BA.2	BA.2	BA.2	0	0.04	0	67	69.7917	0
hCoV-19/Italy/LAZ-AMC-220510308-DS/2022	MT|BA.2|EPI_ISL_13826611|2022-05-10|Italy	MT	EPI_ISL_13826611	Italy	2022-05-10	BA.2	BA.2	BA.2	0	0.04	0	57	59.375	0
hCoV-19/France/PDL-HMN-22062210382/2022	MT|BA.2|EPI_ISL_13854249|2022-05-09|France	MT	EPI_ISL_13854249	France	2022-05-09	BA.2	BA.2	BA.2	0.333333	0.04	1	59	61.4583	1.04167
hCoV-19/Australia/VIC65611/2022	MT|BA.2|EPI_ISL_13870343|2022-07-02|Australia	MT	EPI_ISL_13870343	Australia	2022-07-02	BA.2	BA.2	BA.2	0	0.04	0	63	65.625	0
hCoV-19/Georgia/Tb-s5257/2022	MT|BA.2|EPI_ISL_13884652|2022-06-18|Georgia	MT	EPI_ISL_13884652	Georgia	2022-06-18	BA.2	BA.2	BA.2	0	0.04	0	58	60.4167	0
hCoV-19/Ireland/OY-NVRL-ecS22IRL00325475/2022	MT|BA.2|EPI_ISL_13950918|2022-05-11|Ireland	MT	EPI_ISL_13950918	Ireland	2022-05-11	BA.2	BA.2	BA.2	0	0.04	1	49	51.0417	1.04167
hCoV-19/India/MH_BJCOG_INSACOG_3643/2022	MT|BA.2|EPI_ISL_13981292|2022-06-19|India	MT	EPI_ISL_13981292	India	2022-06-19	BA.2	BA.2	BA.2	0	0.04	0	58	60.4167	0
hCoV-19/Northern Ireland/NIRE-01d509/2022	MT|BA.2|EPI_ISL_14022892|2022-05-26|Northern_Ireland	MT	EPI_ISL_14022892	Northern_Ireland	2022-05-26	BA.2	BA.2	BA.2	0	0.04	2	74	77.0833	2.08333
hCoV-19/Brazil/PE-FIOCRUZ-IAM10454/2022	MT|BA.2|EPI_ISL_14034168|2022-06-15|Brazil	MT	EPI_ISL_14034168	Brazil	2022-06-15	BA.2	BA.2	BA.2	0.5	0.04	0	52	54.1667	0
hCoV-19/India/PB-VRDLGMCPTA-ICMR-INSACOG-671309779/2022	MT|BA.2|EPI_ISL_14147903|2022-02-02|India	MT	EPI_ISL_14147903	India	2022-02-02	BA.2	BA.2	BA.2	0.5	0.04	0	46	47.9167	0
hCoV-19/Russia/SPE-RII-28532S/2022	MT|BA.2|EPI_ISL_14160820|2022-07-14|Russia	MT	EPI_ISL_14160820	Russia	2022-07-14	BA.2	BA.2	BA.2	0	0.04	3	51	53.125	3.125
hCoV-19/India/WB-INSACOG-1931300694999/2022	MT|BA.2|EPI_ISL_14167179|2022-07-07|India	MT	EPI_ISL_14167179	India	2022-07-07	BA.2	BA.2	BA.2	0	0.04	3	64	66.6667	3.125
hCoV-19/Sweden/14429651X5/2022	MT|BA.2|EPI_ISL_14232256|2022-06-14|Sweden	MT	EPI_ISL_14232256	Sweden	2022-06-14	BA.2	BA.2	BA.2	0	0.04	0	43	44.7917	0
hCoV-19/Austria/LB-R00093-S306/2022	MT|BA.2|EPI_ISL_14355586|2022-08-02|Austria	MT	EPI_ISL_14355586	Austria	2022-08-02	BA.2	BA.2	BA.2	0.25	0.04	1	61	63.5417	1.04167
hCoV-19/Vietnam/BMH-050822-sample84/2022	MT|BA.2|EPI_ISL_14356027|2022-07-20|Vietnam	MT	EPI_ISL_14356027	Vietnam	2022-07-20	BA.2	BA.2	BA.2	0	0.04	0	55	57.2917	0
hCoV-19/Germany/NW-RKI-I-951056/2022	MT|BA.2|EPI_ISL_14520381|2022-06-17|Germany	MT	EPI_ISL_14520381	Germany	2022-06-17	BA.2	BA.2	BA.2	0	0.04	0	52	54.1667	0
hCoV-19/Sweden/38240599XX/2022	MT|BA.2|EPI_ISL_14544667|2022-07-27|Sweden	MT	EPI_ISL_14544667	Sweden	2022-07-27	BA.2	BA.2	BA.2	0	0.04	0	61	63.5417	0
hCoV-19/India/KA-RFNB-16631/2022	MT|BA.2|EPI_ISL_14587016|2022-08|India	MT	EPI_ISL_14587016	India	2022-08	BA.2	BA.2	BA.2	0	0.04	4	59	61.4583	4.16667
hCoV-19/Spain/GA-CHOP-51929242/2022	MT|BA.2|EPI_ISL_14683500|2022-08-04|Spain	MT	EPI_ISL_14683500	Spain	2022-08-04	BA.2	BA.2	BA.2	0	0.04	3	65	67.7083	3.125
hCoV-19/Jamaica/JAM-UWIMicro-1605/2022	MT|BA.2|EPI_ISL_14780311|2022-05-17|Jamaica	MT	EPI_ISL_14780311	Jamaica	2022-05-17	BA.2	BA.2	BA.2	0	0.04	0	56	58.3333	0
hCoV-19/India/MH-INSACOG-CSIR-NEERI2666/2022	MT|BA.2|EPI_ISL_14910747|2022-08-18|India	MT	EPI_ISL_14910747	India	2022-08-18	BA.2.75	BA.2	BA.2.75	0.5	0.04	4	58	60.4167	4.16667
hCoV-19/Russia/TA-RII-MH74466S/2022	MT|BA.2|EPI_ISL_14937654|2022-08-02|Russia	MT	EPI_ISL_14937654	Russia	2022-08-02	BA.2	BA.2	BA.2	0	0.04	2	64	66.6667	2.08333
hCoV-19/France/NOR-CHURouen-23515545/2022	MT|BA.2|EPI_ISL_14949065|2022-08-29|France	MT	EPI_ISL_14949065	France	2022-08-29	BA.2	BA.2	BA.2	0	0.04	1	69	71.875	1.04167
hCoV-19/India/KA-SLS-SEQ-42216/2022	MT|BA.2|EPI_ISL_14993124|2022-07-22|India	MT	EPI_ISL_14993124	India	2022-07-22	BA.2	BA.2	BA.2	0	0.04	1	63	65.625	1.04167
hCoV-19/USA/NY-CDC-LC0877578/2022	MT|BA.2|EPI_ISL_15042972|2022-09-03|USA	MT	EPI_ISL_15042972	USA	2022-09-03	BA.2.75	BA.2	BA.2.75	0.333333	0.04	2	56	58.3333	2.08333
hCoV-19/India/GJ-INSACOG-GBRC8667/2022	MT|BA.2|EPI_ISL_15058240|2022-07-20|India	MT	EPI_ISL_15058240	India	2022-07-20	BA.2	BA.2	BA.2	0	0.04	3	51	53.125	3.125
hCoV-19/India/OR-ILSGS19366/2022	MT|BA.2|EPI_ISL_15153260|2022-08-24|India	MT	EPI_ISL_15153260	India	2022-08-24	BA.2	BA.2	BA.2	0	0.04	2	52	54.1667	2.08333
hCoV-19/India/OR-ILSGS19367/2022	MT|BA.2|EPI_ISL_15153261|2022-08-23|India	MT	EPI_ISL_15153261	India	2022-08-23	BA.2	BA.2	BA.2	0	0.04	1	54	56.25	1.04167
hCoV-19/India/OR-ILSGS19376/2022	MT|BA.2|EPI_ISL_15153269|2022-08-27|India	MT	EPI_ISL_15153269	India	2022-08-27	BA.2	BA.2	BA.2	0.333333	0.04	2	54	56.25	2.08333
hCoV-19/USA/CO-CDPHE-2103603674/2022	MT|BA.2|EPI_ISL_15182041|2022-08-11|USA	MT	EPI_ISL_15182041	USA	2022-08-11	BA.2	BA.2	BA.2	0	0.04	3	59	61.4583	3.125
hCoV-19/England/PHEC-YYG7O44/2022	MT|BA.2|EPI_ISL_15283310|2022-09-22|England	MT	EPI_ISL_15283310	England	2022-09-22	BA.2	BA.2	BA.2	0	0.04	1	64	66.6667	1.04167
hCoV-19/India/KA-18272/2022	MT|BA.2|EPI_ISL_15294680|2022-07-22|India	MT	EPI_ISL_15294680	India	2022-07-22	BA.2	BA.2	BA.2	0	0.04	3	57	59.375	3.125
hCoV-19/India/KA-18353/2022	MT|BA.2|EPI_ISL_15294752|2022-08-04|India	MT	EPI_ISL_15294752	India	2022-08-04	BA.2	BA.2	BA.2	0	0.04	4	55	57.2917	4.16667
hCoV-19/India/MH-RFIP14332/2022	MT|BA.2|EPI_ISL_15421927|2022-06-29|India	MT	EPI_ISL_15421927	India	2022-06-29	BA.2.75	BA.2	BA.2.75	0.5	0.04	2	60	62.5	2.08333
hCoV-19/England/PHEC-YY8FUGO/2022	MT|BA.2|EPI_ISL_15505985|2022-10-07|England	MT	EPI_ISL_15505985	England	2022-10-07	BA.2	BA.2	BA.2	0	0.04	2	68	70.8333	2.08333
hCoV-19/Indonesia/JK-SU-MFMUSU-WGS-22-0119-HJ/2022	MT|BA.2|EPI_ISL_15542409|2022-10-17|Indonesia	MT	EPI_ISL_15542409	Indonesia	2022-10-17	BA.2	BA.2	BA.2	0.75	0.04	2	55	57.2917	2.08333
hCoV-19/Malaysia/HPUPM_NGS0442/2022	MT|BA.2|EPI_ISL_15577092|2022-09-10|Malaysia	MT	EPI_ISL_15577092	Malaysia	2022-09-10	BA.2.75	BA.2	BA.2.75	0.5	0.04	2	59	61.4583	2.08333
hCoV-19/England/QEUH-325D74BD/2022	MT|BA.2|EPI_ISL_15649157|2022-10-26|England	MT	EPI_ISL_15649157	England	2022-10-26	BA.2	BA.2	BA.2	0	0.04	2	93	96.875	2.08333
hCoV-19/England/PHEC-YY8CY6R/2022	MT|BA.2|EPI_ISL_15760609|2022-10-29|England	MT	EPI_ISL_15760609	England	2022-10-29	BA.2	BA.2	BA.2	0.5	0.04	1	65	67.7083	1.04167
hCoV-19/Ireland/MH-NVRL-ecS22IRL00454644/2022	MT|BA.2|EPI_ISL_15839601|2022-10-11|Ireland	MT	EPI_ISL_15839601	Ireland	2022-10-11	BA.2	BA.2	BA.2	0	0.04	2	48	50	2.08333
hCoV-19/Russia/MOW-PMVL-DZ-55142420960/2022	MT|BA.2|EPI_ISL_15873221|2022-03-21|Russia	MT	EPI_ISL_15873221	Russia	2022-03-21	BA.2	BA.2	BA.2	0	0.04	1	59	61.4583	1.04167
hCoV-19/Russia/MOW-PMVL-DZ-18814224660/2022	MT|BA.2|EPI_ISL_15886268|2022-01-26|Russia	MT	EPI_ISL_15886268	Russia	2022-01-26	BA.2	BA.2	BA.2	0	0.04	1	58	60.4167	1.04167
hCoV-19/Thailand/NIC_BKK_SJ0769/2022	MT|BA.2|EPI_ISL_16061685|2022-05-06|Thailand	MT	EPI_ISL_16061685	Thailand	2022-05-06	BA.2	BA.2	BA.2	0	0.04	3	63	65.625	3.125
hCoV-19/Qatar/QA.QU_18.61.E4/2022	MT|BA.2|EPI_ISL_16077066|2022-08-22|Qatar	MT	EPI_ISL_16077066	Qatar	2022-08-22	BA.2	BA.2	BA.2	0	0.04	4	60	62.5	4.16667
hCoV-19/Kuwait/batch2-Sample4/2022	MT|BA.2|EPI_ISL_16201275|2022-08-30|Kuwait	MT	EPI_ISL_16201275	Kuwait	2022-08-30	BA.2	BA.2	BA.2	0	0.04	0	31	32.2917	0
hCoV-19/Spain/CL-COV38573/2022	MT|BA.2|EPI_ISL_16245329|2022-11-17|Spain	MT	EPI_ISL_16245329	Spain	2022-11-17	BA.2	BA.2	BA.2	0	0.04	2	56	58.3333	2.08333
hCoV-19/India/MH-ICMR-NIV-G-12820/2022	MT|BA.2|EPI_ISL_16259778|2022-12-15|India	MT	EPI_ISL_16259778	India	2022-12-15	BA.2	BA.2	BA.2	0	0.04	4	51	53.125	4.16667
hCoV-19/India/MH-ICMR-NIV-G-12806/2022	MT|BA.2|EPI_ISL_16259781|2022-11-18|India	MT	EPI_ISL_16259781	India	2022-11-18	BA.2	BA.2	BA.2	0	0.04	4	53	55.2083	4.16667
hCoV-19/France/BRE-ChuBr-2211563081/2022	MT|BA.2|EPI_ISL_16283854|2022-11-29|France	MT	EPI_ISL_16283854	France	2022-11-29	BA.2	BA.2	BA.2	0	0.04	0	65	67.7083	0
hCoV-19/India/GJ-INSACOG-GBRC10135/2022	MT|BA.2|EPI_ISL_16372276|2022-10-24|India	MT	EPI_ISL_16372276	India	2022-10-24	BA.2	BA.2	BA.2	0	0.04	3	51	53.125	3.125
hCoV-19/Spain/MD-HUFA-221201/2022	MT|BA.2|EPI_ISL_16384522|2022-12-05|Spain	MT	EPI_ISL_16384522	Spain	2022-12-05	BA.2	BA.2	BA.2	0	0.04	1	72	75	1.04167
hCoV-19/USA/TX-HMH-120743/2022	MT|BA.2|EPI_ISL_16398035|2022-12-21|USA	MT	EPI_ISL_16398035	USA	2022-12-21	BA.2	BA.2	BA.2	0	0.04	1	73	76.0417	1.04167
hCoV-19/USA/TX-HMH-120720/2022	MT|BA.2|EPI_ISL_16398060|2022-12-20|USA	MT	EPI_ISL_16398060	USA	2022-12-20	BA.2	BA.2	BA.2	0	0.04	4	72	75	4.16667
hCoV-19/USA/IL-S22WGS6789/2022	MT|BA.2|EPI_ISL_16431011|2022-12-18|USA	MT	EPI_ISL_16431011	USA	2022-12-18	BA.2	BA.2	BA.2	0	0.04	6	63	65.625	6.25
hCoV-19/USA/IL-S22WGS6911/2022	MT|BA.2|EPI_ISL_16431084|2022-12-23|USA	MT	EPI_ISL_16431084	USA	2022-12-23	BA.2	BA.2	BA.2	0	0.04	6	63	65.625	6.25
hCoV-19/Malaysia/HPUPM_NGS0750/2022	MT|BA.2|EPI_ISL_16449536|2022-11-07|Malaysia	MT	EPI_ISL_16449536	Malaysia	2022-11-07	BA.2.75	BA.2	BA.2.75	0.333333	0.04	5	66	68.75	5.20833
hCoV-19/India/GJ-GBRC10163/2022	MT|BA.2|EPI_ISL_16459348|2022-12-30|India	MT	EPI_ISL_16459348	India	2022-12-30	BA.2	BA.2	BA.2	0	0.04	3	52	54.1667	3.125
hCoV-19/Austria/AGES-1165139/2022	MT|BA.2|EPI_ISL_16561181|2022-12-13|Austria	MT	EPI_ISL_16561181	Austria	2022-12-13	BA.2	BA.2	BA.2	0	0.04	3	59	61.4583	3.125
hCoV-19/Ireland/D-NVRL-ecS22IRL00468315/2022	MT|BA.2|EPI_ISL_16579578|2022-11-19|Ireland	MT	EPI_ISL_16579578	Ireland	2022-11-19	BA.2	BA.2	BA.2	0	0.04	1	47	48.9583	1.04167
hCoV-19/Ireland/CO-CUH-S23C0068/2023	MT|BA.2|EPI_ISL_16641597|2023-01-05|Ireland	MT	EPI_ISL_16641597	Ireland	2023-01-05	BA.2	BA.2	BA.2	0	0.04	3	57	59.375	3.125
hCoV-19/Zambia/ZNPHI-ZLU0031155-01/2023	MT|BA.2|EPI_ISL_16701889|2023-01|Zambia	MT	EPI_ISL_16701889	Zambia	2023-01	BA.2	BA.2	BA.2	0	0.04	1	49	51.0417	1.04167
hCoV-19/South Africa/NICD-N52027/2023	MT|BA.2|EPI_ISL_16750878|2023-01-10|South_Africa	MT	EPI_ISL_16750878	South_Africa	2023-01-10	BA.2	BA.2	BA.2	0	0.04	1	76	79.1667	1.04167
hCoV-19/USA/TX-HMH-M-124096/2023	MT|BA.2|EPI_ISL_16762028|2023-01-20|USA	MT	EPI_ISL_16762028	USA	2023-01-20	BA.2	BA.2	BA.2	0	0.04	3	113	117.708	3.125
hCoV-19/USA/TX-HMH-M-124250/2023	MT|BA.2|EPI_ISL_16762258|2023-01-25|USA	MT	EPI_ISL_16762258	USA	2023-01-25	BA.2	BA.2	BA.2	0	0.04	3	61	63.5417	3.125
hCoV-19/USA/TX-HMH-M-123708/2023	MT|BA.2|EPI_ISL_16762458|2023-01-17|USA	MT	EPI_ISL_16762458	USA	2023-01-17	BA.2	BA.2	BA.2	0	0.04	3	73	76.0417	3.125
hCoV-19/USA/TX-HMH-M-123701/2023	MT|BA.2|EPI_ISL_16762462|2023-01-17|USA	MT	EPI_ISL_16762462	USA	2023-01-17	BA.2	BA.2	BA.2	0	0.04	4	71	73.9583	4.16667
hCoV-19/Germany/BW-RKI-I-1100310/2023	MT|BA.2|EPI_ISL_16883062|2023-02-01|Germany	MT	EPI_ISL_16883062	Germany	2023-02-01	BA.2	BA.2	BA.2	0	0.04	3	57	59.375	3.125
hCoV-19/Brazil/GO-FIOCRUZ-668/2023	MT|BA.2|EPI_ISL_16966997|2023-01-05|Brazil	MT	EPI_ISL_16966997	Brazil	2023-01-05	BA.2	BA.2	BA.2	0	0.04	2	69	71.875	2.08333
hCoV-19/Italy/CAM-TIGEM-IZSM-COLLI-44951/2023	MT|BA.2|EPI_ISL_16997077|2023-01-23|Italy	MT	EPI_ISL_16997077	Italy	2023-01-23	BA.2	BA.2	BA.2	0	0.04	3	63	65.625	3.125
hCoV-19/USA/TX-HMH-M-125302/2023	MT|BA.2|EPI_ISL_17035579|2023-02-08|USA	MT	EPI_ISL_17035579	USA	2023-02-08	BA.2	BA.2	BA.2	0	0.04	2	88	91.6667	2.08333
hCoV-19/Malaysia/HPUPM_NGS0932/2022	MT|BA.2|EPI_ISL_17037252|2022-12-22|Malaysia	MT	EPI_ISL_17037252	Malaysia	2022-12-22	BA.2	BA.2	BA.2	0	0.04	4	62	64.5833	4.16667
hCoV-19/Germany/BY-RKI-I-1113152/2023	MT|BA.2|EPI_ISL_17070850|2023-02-15|Germany	MT	EPI_ISL_17070850	Germany	2023-02-15	BA.2	BA.2	BA.2	0	0.04	1	54	56.25	1.04167
hCoV-19/Italy/LOM_45045598LOR/2023	BG|XBB.1.5|EPI_ISL_17187033|2023-03-03|Italy	BG	EPI_ISL_17187033	Italy	2023-03-03	BA.2	XBB.1.5 (consensus call)	BA.2	0	0.04	3	58	60.4167	3.125
hCoV-19/USA/IL-SHIELD-3032023122/2023	MT|BA.2|EPI_ISL_17211526|2023-02-21|USA	MT	EPI_ISL_17211526	USA	2023-02-21	BA.2	BA.2	BA.2	0	0.04	3	61	63.5417	3.125
hCoV-19/Germany/NW-RKI-I-1119309/2023	MT|BA.2|EPI_ISL_17253906|2023-02-20|Germany	MT	EPI_ISL_17253906	Germany	2023-02-20	BA.2	BA.2	BA.2	0	0.04	1	51	53.125	1.04167
hCoV-19/Germany/NW-RKI-I-1121971/2023	BG|BA.2|EPI_ISL_17256091|2023-03-03|Germany	BG	EPI_ISL_17256091	Germany	2023-03-03	BA.2	BA.2	BA.2	0	0.04	1	37	38.5417	1.04167
hCoV-19/Germany/BY-RKI-I-1122138/2023	BG|BA.2.75|EPI_ISL_17256247|2023-03-06|Germany	BG	EPI_ISL_17256247	Germany	2023-03-06	BA.2.75	BA.2.75	BA.2.75	0	0.04	4	45	46.875	4.16667
hCoV-19/Poland/Kce-364/2023	BG|BA.2.75|EPI_ISL_17266708|2023-03-06|Poland	BG	EPI_ISL_17266708	Poland	2023-03-06	BA.2.75	BA.2.75	BA.2.75	0	0.04	3	72	75	3.125
hCoV-19/Sweden/03_SE600_500000250307SP/2023	MT|BA.2|EPI_ISL_17281101|2023-02-03|Sweden	MT	EPI_ISL_17281101	Sweden	2023-02-03	BA.2	BA.2	BA.2	0	0.04	4	63	65.625	4.16667
hCoV-19/South Korea/KDCA221808/2023	BG|BA.2|EPI_ISL_17294517|2023-03-04|South_Korea	BG	EPI_ISL_17294517	South_Korea	2023-03-04	BA.2	BA.2	BA.2	0.25	0.04	1	46	47.9167	1.04167
hCoV-19/USA/TX-HMH-M-126789/2023	MT|BA.2|EPI_ISL_17305030|2023-03-07|USA	MT	EPI_ISL_17305030	USA	2023-03-07	BA.2	BA.2	BA.2	0.5	0.04	2	97	101.042	2.08333
hCoV-19/India/TN-SPHL-2841/2023	BG|BA.2|EPI_ISL_17372412|2023-03-01|India	BG	EPI_ISL_17372412	India	2023-03-01	BA.2	BA.2	BA.2	0.666667	0.04	0	49	51.0417	0
hCoV-19/India/TN-SPHL-2843/2023	BG|BA.2|EPI_ISL_17372414|2023-03-09|India	BG	EPI_ISL_17372414	India	2023-03-09	BA.2	BA.2	BA.2	0	0.04	1	53	55.2083	1.04167
hCoV-19/Germany/BY-RKI-I-1127572/2023	BG|BA.2|EPI_ISL_17406348|2023-03-15|Germany	BG	EPI_ISL_17406348	Germany	2023-03-15	BA.2	BA.2	BA.2	0	0.04	0	56	58.3333	0
hCoV-19/USA/NJ-GBW-H10-012-6423/2023	BG|BA.2.75|EPI_ISL_17428340|2023-03-31|USA	BG	EPI_ISL_17428340	USA	2023-03-31	BA.2	BA.2.75	BA.2	0	0.04	4	73	76.0417	4.16667
hCoV-19/India/MH-ICMR-NIV-232128/2023	BG|BA.2.1|EPI_ISL_17446132|2023-03-29|India	BG	EPI_ISL_17446132	India	2023-03-29	BA.2	BA.2.1	BA.2.1	0	0.04	1	52	54.1667	1.04167
hCoV-19/Malaysia/HPUPM_NGS0969/2023	BG|BA.2|EPI_ISL_17509034|2023-04-14|Malaysia	BG	EPI_ISL_17509034	Malaysia	2023-04-14	BA.2	BA.2	BA.2	0	0.04	4	67	69.7917	4.16667
hCoV-19/Germany/BY-RKI-I-1131813/2023	BG|BA.2.75|EPI_ISL_17518818|2023-03-21|Germany	BG	EPI_ISL_17518818	Germany	2023-03-21	BA.2.75	BA.2.75	BA.2.75	0.5	0.04	4	50	52.0833	4.16667
hCoV-19/USA/TX-HMH-M-127749/2023	MT|BA.2|EPI_ISL_17523266|2023-03-28|USA	MT	EPI_ISL_17523266	USA	2023-03-28	BA.2	BA.2	BA.2	0	0.04	3	96	100	3.125
hCoV-19/Sweden/03_SE600_000200514002N2/2022	MT|BA.2|EPI_ISL_17527160|2022-12-29|Sweden	MT	EPI_ISL_17527160	Sweden	2022-12-29	BA.2	BA.2	BA.2	0	0.04	4	72	75	4.16667
hCoV-19/South Korea/KDCA228590/2023	MT|BA.2|EPI_ISL_17538685|2023-03-29|South_Korea	MT	EPI_ISL_17538685	South_Korea	2023-03-29	BA.2	BA.2	BA.2	0.142857	0.04	4	65	67.7083	4.16667
hCoV-19/Nepal/NPHL-S-2420/2023	BG|BA.2|EPI_ISL_17591967|2023-03-12|Nepal	BG	EPI_ISL_17591967	Nepal	2023-03-12	BA.2	BA.2	BA.2	0	0.04	1	139	144.792	1.04167
hCoV-19/Nepal/NPHL-S-2437/2023	BG|BA.2|EPI_ISL_17591984|2023-03-22|Nepal	BG	EPI_ISL_17591984	Nepal	2023-03-22	BA.2	BA.2	BA.2	0	0.04	0	75	78.125	0
hCoV-19/Portugal/PT47327/2023	BG|BA.2.75|EPI_ISL_17592538|2023-04-05|Portugal	BG	EPI_ISL_17592538	Portugal	2023-04-05	BA.2.75	BA.2.75	BA.2.75	0	0.04	4	82	85.4167	4.16667
hCoV-19/Spain/GA-SCQ_23-147632/2023	BG|BA.2|EPI_ISL_17614136|2023-03-16|Spain	BG	EPI_ISL_17614136	Spain	2023-03-16	BA.2	BA.2	BA.2	0	0.04	2	45	46.875	2.08333
hCoV-19/Spain/GA-SCQ_23-153168/2023	BG|BA.2.75.3|EPI_ISL_17614169|2023-03-25|Spain	BG	EPI_ISL_17614169	Spain	2023-03-25	BA.2.75	BA.2.75.3	BA.2.75.3	0.8	0.04	2	61	63.5417	2.08333
hCoV-19/Peru/APU-INS-43349/2023	BG|CH.1.1|EPI_ISL_17639894|2023-03-02|Peru	BG	EPI_ISL_17639894	Peru	2023-03-02	BA.2	CH.1.1	BA.2	0	0.04	2	70	72.9167	2.08333
hCoV-19/Sweden/C-360559N2/2022	MT|BA.2|EPI_ISL_17642221|2022-02-17|Sweden	MT	EPI_ISL_17642221	Sweden	2022-02-17	BA.2	BA.2	BA.2	0	0.04	0	84	87.5	0
hCoV-19/India/CH-NII-1758/2023	MT|BA.2|EPI_ISL_17717659|2023-04-20|India	MT	EPI_ISL_17717659	India	2023-04-20	BA.2	BA.2	BA.2	0	0.04	5	39	40.625	5.20833
hCoV-19/Spain/MD-HRYC-12767738/2023	BG|BA.2.1|EPI_ISL_17797704|2023-05-26|Spain	BG	EPI_ISL_17797704	Spain	2023-05-26	BA.2	BA.2.1	BA.2	0.333333	0.04	0	89	92.7083	0
hCoV-19/Colombia/ANT-LDSP4745/2023	BG|XBB.1.5.77|EPI_ISL_17960532|2023-07-05|Colombia	BG	EPI_ISL_17960532	Colombia	2023-07-05	XBB.1.5	XBB.1.5.77	XBB.1.5.77	0	0.04	5	73	76.0417	5.20833
hCoV-19/USA/VA-GBW-H20-336-3326/2023	BG|XBB.1.5|EPI_ISL_17985540|2023-07-04|USA	BG	EPI_ISL_17985540	USA	2023-07-04	Others	XBB.1.5	XBB.1.5	0.5	0.04	5	79	82.2917	5.20833
hCoV-19/Canada/ON-PHL-23-26714/2023	BG|XBB.1.5|EPI_ISL_17994059|2023-07-10|Canada	BG	EPI_ISL_17994059	Canada	2023-07-10	XBB.1.5	XBB.1.5	XBB.1.5	0.5	0.04	5	74	77.0833	5.20833
hCoV-19/Mexico/CMX-INMEGEN-109-1/2023	BG|XBB.1.5|EPI_ISL_17994140|2023-07-03|Mexico	BG	EPI_ISL_17994140	Mexico	2023-07-03	XBB	XBB.1.5	XBB.1.5.81	0	0.04	5	73	76.0417	5.20833
hCoV-19/Sweden/C-03_SE600_000200595576N2/2023	BG|XBB.1.5|EPI_ISL_18009604|2023-07-09|Sweden	BG	EPI_ISL_18009604	Sweden	2023-07-09	XBB.1.5	XBB.1.5	XBB.1.5	0	0.04	5	102	106.25	5.20833
hCoV-19/France/ARA-HCL023110283001/2023	BG|XBB.1.5|EPI_ISL_18010087|2023-07-03|France	BG	EPI_ISL_18010087	France	2023-07-03	XBB.1.5	XBB.1.5	XBB.1.5	0	0.04	5	76	79.1667	5.20833
hCoV-19/Israel/ICH_741198209/2023	BG|XBB.1.5|EPI_ISL_18012532|2023-07-09|Israel	BG	EPI_ISL_18012532	Israel	2023-07-09	XBB.1.5	XBB.1.5	XBB.1.5	0	0.04	5	77	80.2083	5.20833
hCoV-19/Israel/ICH_741198278/2023	BG|XBB.1.5|EPI_ISL_18012543|2023-07-12|Israel	BG	EPI_ISL_18012543	Israel	2023-07-12	XBB.1.5	XBB.1.5	XBB.1.5	0.5	0.04	5	77	80.2083	5.20833
hCoV-19/Italy/APU-IZSPB-PT8097/2023	BG|XBB.1.9.1|EPI_ISL_18013181|2023-07-10|Italy	BG	EPI_ISL_18013181	Italy	2023-07-10	XBB.1.5	XBB.1.9.1	XBB.1.9.1	0.75	0.04	5	79	82.2917	5.20833
hCoV-19/England/CLIMB-CM7YJA9G/2023	BG|GN.4|EPI_ISL_18015565|2023-07-04|United_Kingdom	BG	EPI_ISL_18015565	United_Kingdom	2023-07-04	XBB.1.5	GN.4	GN.4	0	0.04	5	71	73.9583	5.20833
hCoV-19/England/CLIMB-CM7YGAJZ/2023	BG|XBB.1.5|EPI_ISL_18015570|2023-07-05|United_Kingdom	BG	EPI_ISL_18015570	United_Kingdom	2023-07-05	Others	XBB.1.5	XBB.1.5	0.666667	0.04	5	71	73.9583	5.20833
hCoV-19/England/CLIMB-CM7YE7H5/2023	BG|XBB.1.5|EPI_ISL_18015637|2023-07-04|United_Kingdom	BG	EPI_ISL_18015637	United_Kingdom	2023-07-04	XBB.1.5	XBB.1.5	XBB.1.5	0	0.04	5	72	75	5.20833
hCoV-19/Australia/QLD0x0135B5/2023	BG|XBB.1.5|EPI_ISL_18032410|2023-07-05|Australia	BG	EPI_ISL_18032410	Australia	2023-07-05	XBB.1.5	XBB.1.5	XBB.1.5	0.5	0.04	5	76	79.1667	5.20833
hCoV-19/Australia/QLD0x0135A5/2023	BG|XBB.1.5|EPI_ISL_18032437|2023-07-01|Australia	BG	EPI_ISL_18032437	Australia	2023-07-01	XBB.1.5	XBB.1.5	XBB.1.5	0.5	0.04	5	77	80.2083	5.20833
hCoV-19/Thailand/NIC_SNK_7358/2023	BG|XBB.1.5|EPI_ISL_18042071|2023-07-18|Thailand	BG	EPI_ISL_18042071	Thailand	2023-07-18	XBB.1.5	XBB.1.5	XBB.1.5	0.75	0.04	5	76	79.1667	5.20833
hCoV-19/Panama/M271537-GMI/2023	BG|XBB.1.5.72|EPI_ISL_18043478|2023-07-10|Panama	BG	EPI_ISL_18043478	Panama	2023-07-10	XBB.1.5	XBB.1.5.72	XBB.1.5.72	0	0.04	5	69	71.875	5.20833
hCoV-19/England/CLIMB-CM7YGTGB/2023	BG|XBB.1.5|EPI_ISL_18044405|2023-07-12|United_Kingdom	BG	EPI_ISL_18044405	United_Kingdom	2023-07-12	XBB.1.5	XBB.1.5	XBB.1.5	0.5	0.04	5	73	76.0417	5.20833
hCoV-19/USA/MS-MSPHL-0239/2023	BG|XBB.1.5|EPI_ISL_18044667|2023-07-12|USA	BG	EPI_ISL_18044667	USA	2023-07-12	XBB.1.5	XBB.1.5	XBB.1.5	0.5	0.04	5	71	73.9583	5.20833
hCoV-19/South Korea/KDCA252725/2023	BG|XBB.1.5|EPI_ISL_18047062|2023-07-05|South_Korea	BG	EPI_ISL_18047062	South_Korea	2023-07-05	XBB.1.5	XBB.1.5	XBB.1.5	0.5	0.04	5	75	78.125	5.20833
hCoV-19/South Korea/KDCA253115/2023	BG|XBB.1.5.86|EPI_ISL_18047368|2023-07-07|South_Korea	BG	EPI_ISL_18047368	South_Korea	2023-07-07	XBB.1.5	XBB.1.5.86	XBB.1.5.86	0	0.04	5	78	81.25	5.20833
hCoV-19/USA/NY-GBW-H10-015-5247/2023	BG|XBB.1.5.105|EPI_ISL_18049200|2023-07-20|USA	BG	EPI_ISL_18049200	USA	2023-07-20	XBB.1.5	XBB.1.5.105	XBB.1.5.105	0	0.04	5	76	79.1667	5.20833
hCoV-19/USA/CA-GBW-H20-330-6095/2023	BG|XBB.1.5.75|EPI_ISL_18049227|2023-07-18|USA	BG	EPI_ISL_18049227	USA	2023-07-18	XBB.1.5	XBB.1.5.75	XBB.1.5.75	0	0.04	5	76	79.1667	5.20833
hCoV-19/USA/CA-CDPH-6000015953/2023	BG|XBB.1.5|EPI_ISL_18050256|2023-07-05|USA	BG	EPI_ISL_18050256	USA	2023-07-05	XBB.1.5	XBB.1.5	XBB.1.5	0.5	0.04	5	71	73.9583	5.20833
hCoV-19/USA/TX-DSHS-25904/2023	BG|XBB.1.5.103|EPI_ISL_18050275|2023-07-19|USA	BG	EPI_ISL_18050275	USA	2023-07-19	XBB.1.5	XBB.1.5.103	XBB.1.5.103	0	0.04	5	81	84.375	5.20833
hCoV-19/Israel/ICH-741198350/2023	BG|XBB.1.5.95|EPI_ISL_18050865|2023-07-20|Israel	BG	EPI_ISL_18050865	Israel	2023-07-20	XBB.1.5	XBB.1.5.95	XBB.1.5.95	0	0.04	3	65	67.7083	3.125
hCoV-19/USA/MN-MDH-35770/2023	BG|XBB.1.5.104|EPI_ISL_18054073|2023-07-13|USA	BG	EPI_ISL_18054073	USA	2023-07-13	XBB.1.5	XBB.1.5.104	XBB.1.5.104	0	0.04	5	75	78.125	5.20833
hCoV-19/USA/NV-SNPHL-771478/2023	BG|GK.1|EPI_ISL_18055116|2023-07-12|USA	BG	EPI_ISL_18055116	USA	2023-07-12	XBB.1.5	GK.1	GK.1	0	0.04	3	69	71.875	3.125
hCoV-19/USA/NV-SNPHL-772021/2023	BG|GK.1|EPI_ISL_18055127|2023-07-17|USA	BG	EPI_ISL_18055127	USA	2023-07-17	Others	GK.1	GK.1.10	0	0.04	3	74	77.0833	3.125
hCoV-19/Canada/ON-PHL-23-27210/2023	BG|XBB.1.5|EPI_ISL_18055345|2023-07-23|Canada	BG	EPI_ISL_18055345	Canada	2023-07-23	XBB.1.5	XBB.1.5	XBB.1.5	0.5	0.04	4	70	72.9167	4.16667
hCoV-19/USA/TX-HMH-M-130047/2023	BG|XBB.1.9.1|EPI_ISL_18057109|2023-07-13|USA	BG	EPI_ISL_18057109	USA	2023-07-13	XBB.1.5	XBB.1.9.1	XBB.1.9.1	0.5	0.04	5	73	76.0417	5.20833
hCoV-19/USA/TX-HMH-M-130189/2023	BG|XBB.1.5|EPI_ISL_18057294|2023-07-20|USA	BG	EPI_ISL_18057294	USA	2023-07-20	XBB.1.5	XBB.1.5 (consensus call)	XBB.1	0.454545	0.04	5	72	75	5.20833
hCoV-19/USA/TX-HMH-M-130265/2023	BG|XBB.1.5|EPI_ISL_18057327|2023-07-21|USA	BG	EPI_ISL_18057327	USA	2023-07-21	XBB.1.5	XBB.1.5 (consensus call)	XBB.1.16	0	0.04	5	70	72.9167	5.20833
hCoV-19/Spain/VC-FISABIO-118636/2023	BG|XBB.1.5|EPI_ISL_18059163|2023-07-01|Spain	BG	EPI_ISL_18059163	Spain	2023-07-01	XBB.1.5	XBB.1.5	XBB.1.5	0	0.04	5	75	78.125	5.20833
hCoV-19/Israel/SMC-7114471/2023	BG|XBB.1.5.71|EPI_ISL_18062679|2023-07-27|Israel	BG	EPI_ISL_18062679	Israel	2023-07-27	XBB.1.5	XBB.1.5.71	XBB.1.5.71	0	0.04	5	80	83.3333	5.20833
hCoV-19/South Korea/KDCA253544/2023	BG|XBB.1.5.38|EPI_ISL_18062972|2023-07-11|South_Korea	BG	EPI_ISL_18062972	South_Korea	2023-07-11	XBB.1.5	XBB.1.5.38	XBB.1.5.38	0	0.04	5	74	77.0833	5.20833
hCoV-19/Spain/PV-HUD-70037164/2023	BG|GN.4|EPI_ISL_18063201|2023-07-24|Spain	BG	EPI_ISL_18063201	Spain	2023-07-24	XBB.1.5	GN.4	GN.4	0	0.04	4	69	71.875	4.16667
hCoV-19/USA/UT-UPHL-230714773732/2023	BG|XBB.1.5.72|EPI_ISL_18064803|2023-07-04|USA	BG	EPI_ISL_18064803	USA	2023-07-04	XBB.1.5	XBB.1.5.72	XBB.1.5.72	0	0.04	5	74	77.0833	5.20833
hCoV-19/England/CLIMB-CM7YERMM/2023	BG|XBB.1.5|EPI_ISL_18066818|2023-07-16|United_Kingdom	BG	EPI_ISL_18066818	United_Kingdom	2023-07-16	XBB.1.5	XBB.1.5	XBB.1.5	0.5	0.04	5	72	75	5.20833
hCoV-19/France/ARA-HCL723000896701/2023	BG|XBB.1.5|EPI_ISL_18070044|2023-07-10|France	BG	EPI_ISL_18070044	France	2023-07-10	XBB.1.5	XBB.1.5	XBB.1.5	0	0.04	5	78	81.25	5.20833
hCoV-19/Colombia/SAN-INS-VG-30356/2023	BG|XBB.1.5.77|EPI_ISL_18071802|2023-07-02|Colombia	BG	EPI_ISL_18071802	Colombia	2023-07-02	XBB.1.5	XBB.1.5.77	XBB.1.5.77	0	0.04	5	76	79.1667	5.20833
hCoV-19/Denmark/DCGC-647609/2023	BG|XBB.1.5.105|EPI_ISL_18071875|2023-07-24|Denmark	BG	EPI_ISL_18071875	Denmark	2023-07-24	XBB.1.5	XBB.1.5.105	XBB.1.5.105	0	0.04	5	76	79.1667	5.20833
hCoV-19/Italy/VEN-IZSVe-23RS8178-6_PD/2023	BG|GN.4|EPI_ISL_18071903|2023-07-15|Italy	BG	EPI_ISL_18071903	Italy	2023-07-15	XBB.1.5	GN.4	GN.4	0	0.04	5	73	76.0417	5.20833
hCoV-19/Italy/VEN-IZSVe-23RS8178-9_PD/2023	BG|XBB.1.5.72|EPI_ISL_18071917|2023-07-26|Italy	BG	EPI_ISL_18071917	Italy	2023-07-26	XBB.1.5	XBB.1.5.72	XBB.1.5.72	0	0.04	3	68	70.8333	3.125
hCoV-19/England/CLIMB-CM7YE4KQ/2023	BG|XBB.1.5|EPI_ISL_18072020|2023-07-17|United_Kingdom	BG	EPI_ISL_18072020	United_Kingdom	2023-07-17	XBB.1.5	XBB.1.5	XBB.1.5	0.75	0.04	5	74	77.0833	5.20833
hCoV-19/England/CLIMB-CM7YKXCJ/2023	BG|XBB.1.5.91|EPI_ISL_18072116|2023-07-16|United_Kingdom	BG	EPI_ISL_18072116	United_Kingdom	2023-07-16	XBB.1.5	XBB.1.5.91	XBB.1.5	0.333333	0.04	6	75	78.125	6.25
hCoV-19/Spain/MD-HGUGM-7519900/2023	BG|XBB.1.5.72|EPI_ISL_18072758|2023-07-18|Spain	BG	EPI_ISL_18072758	Spain	2023-07-18	XBB.1.5	XBB.1.5.72	XBB.1.5.72	0	0.04	5	72	75	5.20833
hCoV-19/Spain/EX-BA_18582691/2023	BG|JD.1.1|EPI_ISL_18072815|2023-07-25|Spain	BG	EPI_ISL_18072815	Spain	2023-07-25	XBB.1.5	JD.1.1	JD.1.1	0.75	0.04	1	53	55.2083	1.04167
hCoV-19/Spain/EX-BA_18593027/2023	BG|JD.1.1|EPI_ISL_18072824|2023-07-25|Spain	BG	EPI_ISL_18072824	Spain	2023-07-25	Others	JD.1.1	JD.1.1	0.75	0.04	1	53	55.2083	1.04167
hCoV-19/Australia/NSW-ICPMR-48638/2023	BG|XBB.1.5|EPI_ISL_18073796|2023-07-14|Australia	BG	EPI_ISL_18073796	Australia	2023-07-14	XBB.1.5	XBB.1.5	XBB.1.5	0.5	0.04	3	63	65.625	3.125
hCoV-19/USA/AZ-ASU-104100/2023	BG|XBB.1.5|EPI_ISL_18073896|2023-07-17|USA	BG	EPI_ISL_18073896	USA	2023-07-17	XBB.1.5	XBB.1.5	XBB.1.5	0.75	0.04	5	76	79.1667	5.20833
hCoV-19/Sweden/S-1260837352R4/2023	BG|XBB.1.5|EPI_ISL_18075028|2023-07-15|Sweden	BG	EPI_ISL_18075028	Sweden	2023-07-15	XBB.1.5	XBB.1.5	XBB.1.5	0	0.04	5	74	77.0833	5.20833
hCoV-19/Spain/PV-HUD-70038364/2023	BG|XBB.1.5.72|EPI_ISL_18075741|2023-07-28|Spain	BG	EPI_ISL_18075741	Spain	2023-07-28	XBB.1.5	XBB.1.5.72	XBB.1.5.72	0	0.04	4	70	72.9167	4.16667
hCoV-19/Ecuador/GENSBIO-INSPI-SG-495/2023	BG|XBB.1.5.72|EPI_ISL_18075764|2023-07-17|Ecuador	BG	EPI_ISL_18075764	Ecuador	2023-07-17	XBB.1.5	XBB.1.5.72	XBB.1.5.72	0	0.04	3	72	75	3.125
hCoV-19/France/IDF-IPP16402/2023	BG|XBB.1.5.77|EPI_ISL_18075989|2023-07-17|France	BG	EPI_ISL_18075989	France	2023-07-17	XBB.1.5	XBB.1.5.77	XBB.1.5.77	0	0.04	5	74	77.0833	5.20833
hCoV-19/Colombia/DC-INS-VG-30230/2023	BG|XBB.1.5.77|EPI_ISL_18076892|2023-07-15|Colombia	BG	EPI_ISL_18076892	Colombia	2023-07-15	XBB.1.5	XBB.1.5.77	XBB.1.5.77	0	0.04	5	73	76.0417	5.20833
hCoV-19/Colombia/DC-INS-VG-30184/2023	BG|XBB.1.5.72|EPI_ISL_18076905|2023-07-05|Colombia	BG	EPI_ISL_18076905	Colombia	2023-07-05	XBB.1.5	XBB.1.5.72	XBB.1.5.72	0	0.04	5	74	77.0833	5.20833
hCoV-19/Colombia/CUN-INS-VG-30185/2023	BG|XBB.1.5.77|EPI_ISL_18076931|2023-07-05|Colombia	BG	EPI_ISL_18076931	Colombia	2023-07-05	XBB.1.5	XBB.1.5.77	XBB.1.5.77	0.666667	0.04	5	71	73.9583	5.20833
hCoV-19/USA/HI-H2323341/2023	BG|GK.1.1|EPI_ISL_18077334|2023-07-15|USA	BG	EPI_ISL_18077334	USA	2023-07-15	XBB.1.5	GK.1.1	GK.1.1	0	0.04	5	76	79.1667	5.20833
hCoV-19/USA/CA-CDPH-500119051/2023	BG|XBB.1.5.72|EPI_ISL_18080509|2023-07-09|USA	BG	EPI_ISL_18080509	USA	2023-07-09	XBB.1.5	XBB.1.5.72	XBB.1.5.72	0	0.04	5	67	69.7917	5.20833
hCoV-19/USA/CA-CDPH-500119064/2023	BG|XBB.1.5.72|EPI_ISL_18080738|2023-07-05|USA	BG	EPI_ISL_18080738	USA	2023-07-05	XBB.1.5	XBB.1.5.72	XBB.1.5.72	0	0.04	5	75	78.125	5.20833
hCoV-19/USA/CA-CDPH-500118818/2023	BG|XBB.1.5|EPI_ISL_18080789|2023-07-06|USA	BG	EPI_ISL_18080789	USA	2023-07-06	Others	XBB.1.5	XBB.1.5	0.333333	0.04	5	70	72.9167	5.20833
hCoV-19/USA/CA-CDPH-500118835/2023	BG|XBB.1.5.73|EPI_ISL_18080790|2023-07-07|USA	BG	EPI_ISL_18080790	USA	2023-07-07	XBB.1.5	XBB.1.5.73	XBB.1.5.73	0.5	0.04	5	74	77.0833	5.20833
hCoV-19/USA/CA-CDPH-500118716/2023	BG|XBB.1.5|EPI_ISL_18080928|2023-07-10|USA	BG	EPI_ISL_18080928	USA	2023-07-10	XBB.1.5	XBB.1.5	XBB.1.5	0	0.04	5	72	75	5.20833
hCoV-19/USA/CA-CDPH-500118748/2023	BG|XBB.1.5|EPI_ISL_18080943|2023-07-05|USA	BG	EPI_ISL_18080943	USA	2023-07-05	XBB.1.5	XBB.1.5	XBB.1.5	0	0.04	5	74	77.0833	5.20833
hCoV-19/USA/CA-CDPH-500118766/2023	BG|XBB.1.5.81|EPI_ISL_18080953|2023-07-10|USA	BG	EPI_ISL_18080953	USA	2023-07-10	XBB.1.5	XBB.1.5.81	XBB.1.5.81	0	0.04	5	71	73.9583	5.20833
hCoV-19/USA/CA-CDPH-500118775/2023	BG|XBB.1.5|EPI_ISL_18080957|2023-07-05|USA	BG	EPI_ISL_18080957	USA	2023-07-05	XBB.1.5	XBB.1.5	XBB.1.5	0	0.04	5	74	77.0833	5.20833
hCoV-19/USA/CA-CDPH-500118905/2023	BG|XBB.1.5|EPI_ISL_18080993|2023-07-01|USA	BG	EPI_ISL_18080993	USA	2023-07-01	XBB.1.5	XBB.1.5	XBB.1.5	0.333333	0.04	5	72	75	5.20833
hCoV-19/USA/CA-CDPH-500118925/2023	BG|XBB.1.5|EPI_ISL_18081004|2023-07-05|USA	BG	EPI_ISL_18081004	USA	2023-07-05	XBB.1.5	XBB.1.5	XBB.1.5	0.6	0.04	5	71	73.9583	5.20833
hCoV-19/USA/CA-CDPH-500118857/2023	BG|XBB.1.5|EPI_ISL_18081040|2023-07-10|USA	BG	EPI_ISL_18081040	USA	2023-07-10	XBB.1.5	XBB.1.5	XBB.1.5	0.333333	0.04	5	76	79.1667	5.20833
hCoV-19/USA/CA-Stanford-151_S15/2023	BG|XBB.1.5|EPI_ISL_18082014|2023-07-07|USA	BG	EPI_ISL_18082014	USA	2023-07-07	XBB.1.5	XBB.1.5	XBB.1.5	0	0.04	5	74	77.0833	5.20833
hCoV-19/USA/TX-KVI301587/2023	BG|XBB.1.5|EPI_ISL_18082201|2023-07-04|USA	BG	EPI_ISL_18082201	USA	2023-07-04	Others	XBB.1.5 (consensus call)	XBB.1.5	0	0.04	5	80	83.3333	5.20833
hCoV-19/USA/TX-KVI301612/2023	BG|XBB.1.5|EPI_ISL_18082208|2023-07-12|USA	BG	EPI_ISL_18082208	USA	2023-07-12	XBB.1.5	XBB.1.5	XBB.1.5	0	0.04	5	82	85.4167	5.20833
hCoV-19/USA/TX-KVI301613/2023	BG|XBB.1.5|EPI_ISL_18082209|2023-07-12|USA	BG	EPI_ISL_18082209	USA	2023-07-12	XBB.1.5	XBB.1.5	XBB.1.5	0	0.04	5	81	84.375	5.20833
hCoV-19/Scotland/QEUH-2EAA0BFC/2022	MT|BA.2|EPI_ISL_18083834|2022-04-04|Scotland	MT	EPI_ISL_18083834	Scotland	2022-04-04	XBB	BA.2	BA.2	0	0.04	0	56	58.3333	0
hCoV-19/Italy/VEN-AOUIVR-7312661301_VR/2023	BG|XBB.1.33|EPI_ISL_18086984|2023-07-05|Italy	BG	EPI_ISL_18086984	Italy	2023-07-05	BA.2	XBB.1.33	XBB.1.33	0	0.04	4	73	76.0417	4.16667
hCoV-19/Israel/SMC-7114550/2023	BG|GK.2|EPI_ISL_18096850|2023-08-03|Israel	BG	EPI_ISL_18096850	Israel	2023-08-03	XBB	GK.2	GK.2	0	0.04	1	63	65.625	1.04167
hCoV-19/Australia/NSW-ICPMR-48732/2023	BG|XBB.1.5.96|EPI_ISL_18097709|2023-07-31|Australia	BG	EPI_ISL_18097709	Australia	2023-07-31	XBB.1.5	XBB.1.5.96	XBB.1.5.96	0	0.04	1	57	59.375	1.04167
hCoV-19/USA/TX-HMH-M-130681/2023	BG|XBB.1.5|EPI_ISL_18099152|2023-07-29|USA	BG	EPI_ISL_18099152	USA	2023-07-29	XBB.1.5	XBB.1.5 (consensus call)	XBB.1.16	0.5	0.04	5	72	75	5.20833
hCoV-19/Guatemala/2055-DLNS/2023	BG|XBB.1.5|EPI_ISL_18099419|2023-07-21|Guatemala	BG	EPI_ISL_18099419	Guatemala	2023-07-21	XBB.1.5	XBB.1.5	XBB.1.5	0	0.04	5	70	72.9167	5.20833
hCoV-19/Guatemala/2065-DLNS/2023	BG|XBB.1.5.106|EPI_ISL_18099423|2023-07-25|Guatemala	BG	EPI_ISL_18099423	Guatemala	2023-07-25	XBB.1.5	XBB.1.5.106	XBB.1.5.106	0	0.04	1	57	59.375	1.04167
hCoV-19/Guatemala/1986-DLNS/2023	BG|XBB.1.5|EPI_ISL_18099425|2023-07-12|Guatemala	BG	EPI_ISL_18099425	Guatemala	2023-07-12	XBB.1.5	XBB.1.5	XBB.1.5	0	0.04	5	64	66.6667	5.20833
hCoV-19/Argentina/SC2-36419213-RFGB-ARX/2023	BG|XBB.1.5|EPI_ISL_18101662|2023-07-19|Argentina	BG	EPI_ISL_18101662	Argentina	2023-07-19	XBB.1.5	XBB.1.5	XBB.1.5	0.5	0.04	5	77	80.2083	5.20833
hCoV-19/USA/WA-GBW-H10-015-7747/2023	BG|XBB.1.5.72|EPI_ISL_18102673|2023-08-05|USA	BG	EPI_ISL_18102673	USA	2023-08-05	XBB.1.5	XBB.1.5.72	XBB.1.5.72	0	0.04	5	78	81.25	5.20833
hCoV-19/Canada/ON-PHL-23-27451-v2/2023	BG|XBB.1.5.72|EPI_ISL_18104987|2023-07-30|Canada	BG	EPI_ISL_18104987	Canada	2023-07-30	XBB.1.5	XBB.1.5.72	XBB.1.5.72	0	0.04	5	76	79.1667	5.20833
hCoV-19/Canada/ON-PHL-23-27578-v2/2023	BG|HR.1|EPI_ISL_18105091|2023-08-01|Canada	BG	EPI_ISL_18105091	Canada	2023-08-01	XBB.1.5	HR.1	HR.1.1	0	0.04	5	82	85.4167	5.20833
hCoV-19/Canada/ON-PHL-23-27608/2023	BG|FD.2|EPI_ISL_18105117|2023-08-04|Canada	BG	EPI_ISL_18105117	Canada	2023-08-04	Others	FD.2	XBB.1.5	0.5	0.04	4	70	72.9167	4.16667
hCoV-19/Canada/ON-PHL-23-27630/2023	BG|HR.1|EPI_ISL_18105138|2023-08-04|Canada	BG	EPI_ISL_18105138	Canada	2023-08-04	XBB.1.5	HR.1	HR.1.1	0	0.04	5	82	85.4167	5.20833
hCoV-19/Canada/ON-PHL-23-27633/2023	BG|HR.1|EPI_ISL_18105141|2023-08-03|Canada	BG	EPI_ISL_18105141	Canada	2023-08-03	Others	HR.1	HR.1.1	0	0.04	5	81	84.375	5.20833
hCoV-19/Canada/ON-PHL-23-27736/2023	BG|HR.1|EPI_ISL_18105198|2023-08-08|Canada	BG	EPI_ISL_18105198	Canada	2023-08-08	Others	HR.1	HR.1.1	0	0.04	5	82	85.4167	5.20833
hCoV-19/Luxembourg/LNS5529088/2023	BG|GK.1|EPI_ISL_18107108|2023-07-21|Luxembourg	BG	EPI_ISL_18107108	Luxembourg	2023-07-21	XBB.1.5	GK.1	GK.1.8	0	0.04	1	57	59.375	1.04167
hCoV-19/Luxembourg/LNS4244255/2023	BG|GK.2|EPI_ISL_18107128|2023-07-08|Luxembourg	BG	EPI_ISL_18107128	Luxembourg	2023-07-08	Others	GK.2	GK.2	0	0.04	0	51	53.125	0
hCoV-19/Puerto Rico/PR-CVL-019224/2023	BG|XBB.1.5.72|EPI_ISL_18107257|2023-07-24|Puerto_Rico	BG	EPI_ISL_18107257	Puerto_Rico	2023-07-24	XBB.1.5	XBB.1.5.72	XBB.1.5.72	0	0.04	5	68	70.8333	5.20833
hCoV-19/Puerto Rico/PR-CVL-019276/2023	BG|XBB.1.5|EPI_ISL_18107300|2023-07-19|Puerto_Rico	BG	EPI_ISL_18107300	Puerto_Rico	2023-07-19	XBB.1.5	XBB.1.5	XBB.1.5	0	0.04	5	64	66.6667	5.20833
hCoV-19/USA/SD-CDC-2-7216148/2023	BG|XBB.1.5|EPI_ISL_18108140|2023-07-10|USA	BG	EPI_ISL_18108140	USA	2023-07-10	XBB.1.5	XBB.1.5	XBB.1.5	0	0.04	5	73	76.0417	5.20833
hCoV-19/South Africa/NICD-CRDM07947/2023	BG|XBB.1.5.88|EPI_ISL_18108961|2023-07-07|South_Africa	BG	EPI_ISL_18108961	South_Africa	2023-07-07	XBB	XBB.1.5.88	XBB.1.5.88	0	0.04	3	74	77.0833	3.125
hCoV-19/USA/TX-KVI301672/2023	BG|XBB.1.5|EPI_ISL_18111053|2023-07-30|USA	BG	EPI_ISL_18111053	USA	2023-07-30	XBB.1.5	XBB.1.5	XBB.1.5	0	0.04	5	74	77.0833	5.20833
hCoV-19/USA/TX-TAMGHRC-SHS_97708/2023	BG|XCK|EPI_ISL_18111443|2023-07-24|USA	BG	EPI_ISL_18111443	USA	2023-07-24	XBB.1.5	XCK	XCK	0	0.04	3	53	55.2083	3.125
hCoV-19/Australia/QLD0x0136FB/2023	BG|XBB.1.5|EPI_ISL_18111967|2023-08-03|Australia	BG	EPI_ISL_18111967	Australia	2023-08-03	XBB.1.5	XBB.1.5	XBB.1.5	0.5	0.04	5	76	79.1667	5.20833
hCoV-19/USA/OH-ODH-SC3031822/2023	BG|XBB.1.5.72|EPI_ISL_18114471|2023-07-14|USA	BG	EPI_ISL_18114471	USA	2023-07-14	XBB.1.5	XBB.1.5.72	XBB.1.5.72	0	0.04	5	74	77.0833	5.20833
hCoV-19/Egypt/CPHL-23395/2023	MT|BA.2|EPI_ISL_18115583|2023-05-07|Egypt	MT	EPI_ISL_18115583	Egypt	2023-05-07	XBB.1.5	BA.2	BA.2	0.5	0.04	3	64	66.6667	3.125
hCoV-19/Israel/SMC-7114618/2023	BG|XBB.1.5.72|EPI_ISL_18115840|2023-08-13|Israel	BG	EPI_ISL_18115840	Israel	2023-08-13	BA.2	XBB.1.5.72	XBB.1.5.72	0	0.04	1	60	62.5	1.04167
hCoV-19/Israel/SMC-7114669/2023	BG|XBB.1.5.72|EPI_ISL_18115878|2023-08-13|Israel	BG	EPI_ISL_18115878	Israel	2023-08-13	XBB.1.5	XBB.1.5.72	XBB.1.5.72	0	0.04	4	67	69.7917	4.16667
hCoV-19/Qatar/NIC-10-VI-0085782/2023	BG|BA.2|EPI_ISL_18116015|2023-08-10|Qatar	BG	EPI_ISL_18116015	Qatar	2023-08-10	XBB.1.5	BA.2	BA.2	0.333333	0.04	0	82	85.4167	0
hCoV-19/Mexico/NLE-LESPNL-008059/2022	MT|BA.2|EPI_ISL_18131985|2022-12-07|Mexico	MT	EPI_ISL_18131985	Mexico	2022-12-07	BA.2	BA.2	BA.2	0	0.04	3	60	62.5	3.125
hCoV-19/South Africa/NICD-N56070/2023	FG|BA.2.86|EPI_ISL_18228503|2023-08-23|South_Africa	FG	EPI_ISL_18228503	South_Africa	2023-08-23	BA.2.86*	BA.2.86	BA.2.86	0	0.04	24	82	85.4167	25
hCoV-19/USA/OH-ODH-SC3032449/2023	FG|BA.2.86.1|EPI_ISL_18288196|2023-08-26|USA	FG	EPI_ISL_18288196	USA	2023-08-26	BA.2.86*	BA.2.86.1	BA.2.86.1	0	0.04	30	95	98.9583	31.25
hCoV-19/Israel/SMC-7115081/2023	FG|BA.2.86.1|EPI_ISL_18313666|2023-09-10|Israel	FG	EPI_ISL_18313666	Israel	2023-09-10	JN.1*	BA.2.86.1	BA.2.86.1	0	0.04	25	85	88.5417	26.0417
hCoV-19/USA/OH-ODH-SC3032538/2023	FG|BA.2.86.1|EPI_ISL_18316146|2023-09-01|USA	FG	EPI_ISL_18316146	USA	2023-09-01	BA.2	BA.2.86.1	BA.2.86.1	0	0.04	30	96	100	31.25
hCoV-19/Switzerland/BS-UHB-USB_2023_09_10_161c9a51/2023	FG|BA.2.86|EPI_ISL_18329369|2023-09-05|Switzerland	FG	EPI_ISL_18329369	Switzerland	2023-09-05	BA.2.86*	BA.2.86	BA.2.86	0	0.04	30	93	96.875	31.25
hCoV-19/New Zealand/ZA4665/2023	MT|BA.2|EPI_ISL_18347615|2023-09-11|New_Zealand	MT	EPI_ISL_18347615	New_Zealand	2023-09-11	BA.2.86*	BA.2	BA.2	0	0.04	4	53	55.2083	4.16667
hCoV-19/Spain/CL-43893/2023	MT|BA.2|EPI_ISL_18368016|2023-09-08|Spain	MT	EPI_ISL_18368016	Spain	2023-09-08	BA.2.86*	BA.2	BA.2	0	0.04	12	63	65.625	12.5
hCoV-19/England/CLIMB-CM7Y8HEK/2023	MT|BA.2|EPI_ISL_18385525|2023-09-29|England	MT	EPI_ISL_18385525	England	2023-09-29	BA.2.86*	BA.2	BA.2	0	0.04	14	62	64.5833	14.5833
hCoV-19/Saudi Arabia/KAUST630/2023	MT|BA.2|EPI_ISL_18405758|2023-03-20|Saudi_Arabia	MT	EPI_ISL_18405758	Saudi_Arabia	2023-03-20	JN.1*	BA.2	BA.2	0.666667	0.04	2	43	44.7917	2.08333
hCoV-19/France/NAQ-HCL723001349501/2023	FG|JN.2|EPI_ISL_18423143|2023-10-02|France	FG	EPI_ISL_18423143	France	2023-10-02	JN.1*	JN.2	JN.2	0	0.04	30	99	103.125	31.25
hCoV-19/Australia/VIC-VIDRL-00012242/2023	FG|JN.1.1|EPI_ISL_18488428|2023-10-11|Australia	FG	EPI_ISL_18488428	Australia	2023-10-11	BA.2.86*	JN.1.1	JN.1.1	0	0.04	30	100	104.167	31.25
hCoV-19/Denmark/DCGC-662374/2023	FG|JN.1.1|EPI_ISL_18494345|2023-10-23|Denmark	FG	EPI_ISL_18494345	Denmark	2023-10-23	JN.1*	JN.1.1	JN.1.1	0	0.04	30	102	106.25	31.25
hCoV-19/South Africa/NICD-N56831/2023	FG|BA.2.86|EPI_ISL_18507145|2023-10-06|South Africa	FG	EPI_ISL_18507145	South Africa	2023-10-06	BA.2.86*	BA.2.86	BA.2.86	0	0.04	24	108	112.5	25
hCoV-19/South Africa/NICD-N56835/2023	FG|BA.2.86|EPI_ISL_18507147|2023-10-06|South Africa	FG	EPI_ISL_18507147	South Africa	2023-10-06	BA.2.86*	BA.2.86	BA.2.86	0	0.04	25	89	92.7083	26.0417
hCoV-19/Scotland/CLIMB-CM7Y8Y8W/2023	FG|JN.2|EPI_ISL_18521854|2023-11-02|United_Kingdom	FG	EPI_ISL_18521854	United_Kingdom	2023-11-02	BA.2.86*	JN.2	JN.2	0	0.04	30	97	101.042	31.25
hCoV-19/Netherlands/NB-PAMM-K01-0634/2023	FG|JN.1.1|EPI_ISL_18522357|2023-11-01|Netherlands	FG	EPI_ISL_18522357	Netherlands	2023-11-01	JN.1*	JN.1.1	JN.1.1	0.5	0.04	25	91	94.7917	26.0417
hCoV-19/Netherlands/NB-PAMM-K12-0226/2023	FG|JN.1|EPI_ISL_18522389|2023-11-12|Netherlands	FG	EPI_ISL_18522389	Netherlands	2023-11-12	JN.1*	JN.1.44	JN.1	0	0.04	24	100	104.167	25
hCoV-19/Germany/BY-MVP-000021575/2023	FG|JN.1|EPI_ISL_18525909|2023-10-05|Germany	FG	EPI_ISL_18525909	Germany	2023-10-05	BA.2	JN.1	JN.1	0	0.04	25	90	93.75	26.0417
hCoV-19/France/PAC-HCL723001533801/2023	FG|BA.2.86.1|EPI_ISL_18545334|2023-11-13|France	FG	EPI_ISL_18545334	France	2023-11-13	JN.1*	BA.2.86.1	BA.2.86.1	0	0.04	30	95	98.9583	31.25
hCoV-19/Scotland/CLIMB-CM7YMQKC/2023	FG|JN.2|EPI_ISL_18552889|2023-11-04|United Kingdom	FG	EPI_ISL_18552889	United Kingdom	2023-11-04	BA.2.86*	JN.2	JN.2	0	0.04	29	89	92.7083	30.2083
hCoV-19/South Africa/NICD-N56872/2023	FG|BA.2.86|EPI_ISL_18557865|2023-10-03|South Africa	FG	EPI_ISL_18557865	South Africa	2023-10-03	BA.2.86*	BA.2.86	BA.2.86	0	0.04	24	82	85.4167	25
hCoV-19/Poland/0828WSN_wsseol/2023	FG|BA.2.86.1|EPI_ISL_18567663|2023-11-10|Poland	FG	EPI_ISL_18567663	Poland	2023-11-10	JN.1*	BA.2.86.1	BA.2	0	0.04	16	78	81.25	16.6667
hCoV-19/Poland/0833WSN_wsseol/2023	FG|BA.2.86|EPI_ISL_18567668|2023-11-10|Poland	FG	EPI_ISL_18567668	Poland	2023-11-10	BA.2	BA.2.86.1	BA.2	0	0.04	14	72	75	14.5833
hCoV-19/Poland/0843WSN_wsseol/2023	FG|BA.2.86|EPI_ISL_18567678|2023-10-30|Poland	FG	EPI_ISL_18567678	Poland	2023-10-30	BA.2	BA.2.86.1	BA.2	0	0.04	13	73	76.0417	13.5417
hCoV-19/Poland/0894WSN_wsseol/2023	FG|JN.1|EPI_ISL_18567725|2023-11-17|Poland	FG	EPI_ISL_18567725	Poland	2023-11-17	BA.2	JN.1	JN.1	0	0.04	19	80	83.3333	19.7917
hCoV-19/Netherlands/NB-PAMM-K22-0709/2023	FG|JN.1|EPI_ISL_18577945|2023-11-22|Netherlands	FG	EPI_ISL_18577945	Netherlands	2023-11-22	JN.1*	JN.1	JN.1	0	0.04	25	89	92.7083	26.0417
hCoV-19/Norway/11531/2023	FG|JN.1|EPI_ISL_18578497|2023-11-06|Norway	FG	EPI_ISL_18578497	Norway	2023-11-06	JN.1*	JN.1.8	JN.1.8	0	0.04	20	74	77.0833	20.8333
hCoV-19/England/CLIMB-CM7YJ8YS/2023	FG|JN.1.1|EPI_ISL_18585323|2023-11-26|United_Kingdom	FG	EPI_ISL_18585323	United_Kingdom	2023-11-26	BA.2.86*	JN.1.1	JN.1.1	0	0.04	28	86	89.5833	29.1667
hCoV-19/Spain/GA-CHUAC-11767/2023	FG|JN.1|EPI_ISL_18593903|2023-12-03|Spain	FG	EPI_ISL_18593903	Spain	2023-12-03	Others	JN.1	JN.1	0	0.04	30	100	104.167	31.25
hCoV-19/Austria/AGES-1143057/2023	FG|JN.1|EPI_ISL_18596821|2023-11-20|Austria	FG	EPI_ISL_18596821	Austria	2023-11-20	BA.2.86*	JN.1	JN.1	0	0.04	25	89	92.7083	26.0417
hCoV-19/Austria/AGES-1143077/2023	FG|BA.2.86.1|EPI_ISL_18596840|2023-11-09|Austria	FG	EPI_ISL_18596840	Austria	2023-11-09	JN.1*	BA.2.86.1	BA.2.86.1	0	0.04	25	89	92.7083	26.0417
hCoV-19/Austria/AGES-1143161/2023	FG|BA.2.86.1|EPI_ISL_18596904|2023-11-24|Austria	FG	EPI_ISL_18596904	Austria	2023-11-24	BA.2.86*	BA.2.86.1	BA.2.86.1	0	0.04	25	88	91.6667	26.0417
hCoV-19/South Africa/UCT-NHLS-K059819/2023	FG|BA.2.86|EPI_ISL_18607079|2023-10-30|South Africa	FG	EPI_ISL_18607079	South Africa	2023-10-30	BA.2.86*	BA.2.86	BA.2.86	0	0.04	29	94	97.9167	30.2083
hCoV-19/Poland/0930WSN_wsseol/2023	FG|BA.2.86.1|EPI_ISL_18612941|2023-11-15|Poland	FG	EPI_ISL_18612941	Poland	2023-11-15	JN.1*	BA.2.86.1	JN.10	0	0.04	19	76	79.1667	19.7917
hCoV-19/Poland/0949WSN_wsseol/2023	FG|JN.1|EPI_ISL_18612958|2023-11-17|Poland	FG	EPI_ISL_18612958	Poland	2023-11-17	JN.1*	JN.1.39	JN.1	0	0.04	19	79	82.2917	19.7917
hCoV-19/Poland/0952WSN_wsseol/2023	FG|BA.2.86.1|EPI_ISL_18612961|2023-11-16|Poland	FG	EPI_ISL_18612961	Poland	2023-11-16	JN.1*	BA.2.86.1	BA.2.86.1	0	0.04	19	76	79.1667	19.7917
hCoV-19/Poland/0960WSN_wsseol/2023	FG|BA.2.86|EPI_ISL_18612968|2023-11-20|Poland	FG	EPI_ISL_18612968	Poland	2023-11-20	BA.2.86*	BA.2.86	BA.2.86	0	0.04	19	74	77.0833	19.7917
hCoV-19/Poland/0962WSN_wsseol/2023	FG|JN.1|EPI_ISL_18612970|2023-11-22|Poland	FG	EPI_ISL_18612970	Poland	2023-11-22	BA.2.86*	JN.1.44	JN.1	0	0.04	19	81	84.375	19.7917
hCoV-19/Poland/0986WSN_wsseol/2023	FG|JN.1|EPI_ISL_18612993|2023-12-05|Poland	FG	EPI_ISL_18612993	Poland	2023-12-05	BA.2	JN.1	JN.1	0	0.04	19	78	81.25	19.7917
hCoV-19/England/CLIMB-CM7YJYTT/2023	FG|JN.2|EPI_ISL_18613120|2023-11-26|United Kingdom	FG	EPI_ISL_18613120	United Kingdom	2023-11-26	XBB	JN.2	JN.2	0.5	0.04	28	82	85.4167	29.1667
hCoV-19/Luxembourg/LNS2645396/2023	FG|JN.1.1|EPI_ISL_18625336|2023-11-05|Luxembourg	FG	EPI_ISL_18625336	Luxembourg	2023-11-05	JN.1*	JN.1.1	JN.1.1	0	0.04	17	73	76.0417	17.7083
hCoV-19/USA/MN-MDH-38336/2023	FG|JN.1|EPI_ISL_18637975|2023-11-21|USA	FG	EPI_ISL_18637975	USA	2023-11-21	BA.2.86*	JN.1.4	JN.1.4	0	0.04	29	92	95.8333	30.2083
hCoV-19/USA/CO-CDPHE-41556989/2023	FG|JN.1|EPI_ISL_18656656|2023-11-23|USA	FG	EPI_ISL_18656656	USA	2023-11-23	JN.1*	JN.1.4.5	JN.1.4	0	0.04	30	99	103.125	31.25
hCoV-19/USA/CO-CDPHE-41557334/2023	FG|JN.1|EPI_ISL_18656882|2023-11-21|USA	FG	EPI_ISL_18656882	USA	2023-11-21	JN.1*	JN.1.22	JN.1.22	0	0.04	30	98	102.083	31.25
hCoV-19/USA/CA-SFDPH-WB230001277/2023	MT|BA.2|EPI_ISL_18657086|2023-11-30|USA	MT	EPI_ISL_18657086	USA	2023-11-30	JN.1*	BA.2	BA.2	0	0.04	7	59	61.4583	7.29167
hCoV-19/Brazil/CE-LACENCE-232309988/2023	FG|JN.1.1|EPI_ISL_18659709|2023-11-27|Brazil	FG	EPI_ISL_18659709	Brazil	2023-11-27	BA.2	JN.1.1	JN.1.1	0	0.04	29	93	96.875	30.2083
hCoV-19/Sweden/O-14_SE300_DC23-007008/2023	FG|BA.2.86.1|EPI_ISL_18659939|2023-12-15|Sweden	FG	EPI_ISL_18659939	Sweden	2023-12-15	BA.2	BA.2.86.1	BA.2.86.1	0	0.04	25	91	94.7917	26.0417
hCoV-19/Ireland/D-CS0645/2023	MT|BA.2|EPI_ISL_18668995|2023-11-28|Ireland	MT	EPI_ISL_18668995	Ireland	2023-11-28	BA.2.86*	BA.2	BA.2	0	0.04	18	86	89.5833	18.75
hCoV-19/South Africa/NICD-N57015/2023	FG|BA.2.86|EPI_ISL_18669142|2023-11-15|South Africa	FG	EPI_ISL_18669142	South Africa	2023-11-15	BA.2.86*	BA.2.86	BA.2.86	0.666667	0.04	23	84	87.5	23.9583
hCoV-19/South Africa/NICD-N57044/2023	FG|BA.2.86.3|EPI_ISL_18669166|2023-10-23|South Africa	FG	EPI_ISL_18669166	South Africa	2023-10-23	BA.2.86*	BA.2.86.3	BA.2.86.3	0	0.04	24	87	90.625	25
hCoV-19/South Africa/NICD-N57065/2023	FG|BA.2.86|EPI_ISL_18669181|2023-11-03|South Africa	FG	EPI_ISL_18669181	South Africa	2023-11-03	BA.2	BA.2.86	BA.2.86	0	0.04	24	89	92.7083	25
hCoV-19/South Africa/NICD-N57071/2023	FG|BA.2.86|EPI_ISL_18669185|2023-11-03|South Africa	FG	EPI_ISL_18669185	South Africa	2023-11-03	BA.2.86*	BA.2.86	BA.2.86	0	0.04	24	84	87.5	25
hCoV-19/South Africa/NICD-N57074/2023	FG|BA.2.86|EPI_ISL_18669188|2023-11-02|South Africa	FG	EPI_ISL_18669188	South Africa	2023-11-02	BA.2.86*	BA.2.86	BA.2.86	0	0.04	24	85	88.5417	25
hCoV-19/South Africa/NICD-N57096/2023	FG|BA.2.86|EPI_ISL_18669205|2023-10-30|South Africa	FG	EPI_ISL_18669205	South Africa	2023-10-30	BA.2.86*	BA.2.86	BA.2.86	0	0.04	24	81	84.375	25
hCoV-19/South Africa/NICD-N57099/2023	FG|BA.2.86|EPI_ISL_18669208|2023-10-30|South Africa	FG	EPI_ISL_18669208	South Africa	2023-10-30	BA.2.86*	BA.2.86	BA.2	0	0.04	24	86	89.5833	25
hCoV-19/South Africa/NICD-N57123/2023	FG|BA.2.86|EPI_ISL_18669222|2023-11-16|South Africa	FG	EPI_ISL_18669222	South Africa	2023-11-16	BA.2.86*	BA.2.86	BA.2.86	0	0.04	24	84	87.5	25
hCoV-19/South Africa/NICD-N57125/2023	FG|BA.2.86|EPI_ISL_18669224|2023-11-20|South Africa	FG	EPI_ISL_18669224	South Africa	2023-11-20	BA.2.86*	BA.2.86	BA.2.86	0	0.04	24	80	83.3333	25
hCoV-19/South Africa/NICD-N57156/2023	FG|BA.2.86|EPI_ISL_18669245|2023-10-03|South Africa	FG	EPI_ISL_18669245	South Africa	2023-10-03	BA.2.86*	BA.2.86	BA.2.86	0	0.04	24	84	87.5	25
hCoV-19/South Africa/NICD-N57197/2023	FG|BA.2.86|EPI_ISL_18669269|2023-11-14|South Africa	FG	EPI_ISL_18669269	South Africa	2023-11-14	BA.2.86*	BA.2.86	BA.2.86	0	0.04	24	83	86.4583	25
hCoV-19/South Africa/NICD-N57200/2023	FG|BA.2.86|EPI_ISL_18669272|2023-10-30|South Africa	FG	EPI_ISL_18669272	South Africa	2023-10-30	BA.2.86*	BA.2.86	BA.2.86	0	0.04	24	84	87.5	25
hCoV-19/South Africa/NICD-N57214/2023	FG|BA.2.86|EPI_ISL_18669281|2023-11-06|South Africa	FG	EPI_ISL_18669281	South Africa	2023-11-06	BA.2.86*	BA.2.86	BA.2.86	0	0.04	24	83	86.4583	25
hCoV-19/South Africa/NICD-N57223/2023	FG|BA.2.86|EPI_ISL_18669287|2023-11-13|South Africa	FG	EPI_ISL_18669287	South Africa	2023-11-13	BA.2.86*	BA.2.86	BA.2.86	0	0.04	24	85	88.5417	25
hCoV-19/Poland/0993WSN2023_wsseol/2023	FG|JN.2|EPI_ISL_18673629|2023-11-23|Poland	FG	EPI_ISL_18673629	Poland	2023-11-23	BA.2.86*	JN.2.2	JN.2.2	0	0.04	19	80	83.3333	19.7917
hCoV-19/Poland/0995WSN2023_wsseol/2023	FG|JN.3|EPI_ISL_18673631|2023-11-23|Poland	FG	EPI_ISL_18673631	Poland	2023-11-23	JN.1*	JN.3	JN.3	0	0.04	19	77	80.2083	19.7917
hCoV-19/Poland/0997WSN2023_wsseol/2023	FG|JN.5|EPI_ISL_18673633|2023-11-23|Poland	FG	EPI_ISL_18673633	Poland	2023-11-23	JN.1*	JN.5	JN.5	0	0.04	19	77	80.2083	19.7917
hCoV-19/Poland/1001WSN2023_wsseol/2023	FG|BA.2.86.1|EPI_ISL_18673637|2023-11-23|Poland	FG	EPI_ISL_18673637	Poland	2023-11-23	JN.1*	BA.2.86.1	BA.2.86.1	0.5	0.04	19	81	84.375	19.7917
hCoV-19/Poland/1007WSN2023_wsseol/2023	FG|JN.1|EPI_ISL_18673643|2023-11-29|Poland	FG	EPI_ISL_18673643	Poland	2023-11-29	BA.2.86*	JN.1	JN.1	0	0.04	19	77	80.2083	19.7917
hCoV-19/Poland/1009WSN2023_wsseol/2023	FG|JN.1|EPI_ISL_18673645|2023-11-29|Poland	FG	EPI_ISL_18673645	Poland	2023-11-29	JN.1*	JN.1	JN.1	0	0.04	19	77	80.2083	19.7917
hCoV-19/Poland/1018WSN2023_wsseol/2023	FG|JN.1|EPI_ISL_18673654|2023-11-30|Poland	FG	EPI_ISL_18673654	Poland	2023-11-30	JN.1*	JN.1.44	JN.1	0	0.04	19	79	82.2917	19.7917
hCoV-19/Poland/1026WSN2023_wsseol/2023	FG|JN.9|EPI_ISL_18673662|2023-12-01|Poland	FG	EPI_ISL_18673662	Poland	2023-12-01	JN.1*	JN.9	JN.9	0	0.04	19	77	80.2083	19.7917
hCoV-19/Poland/1027WSN2023_wsseol/2023	FG|JQ.1|EPI_ISL_18673663|2023-12-01|Poland	FG	EPI_ISL_18673663	Poland	2023-12-01	JN.1*	JQ.1	JQ.1	0	0.04	19	76	79.1667	19.7917
hCoV-19/Poland/1065WSN2023_wsseol/2023	FG|JN.1|EPI_ISL_18673701|2023-12-03|Poland	FG	EPI_ISL_18673701	Poland	2023-12-03	Others	JN.1	JN.1	0	0.04	19	79	82.2917	19.7917
hCoV-19/Poland/1079WSN2023_wsseol/2023	FG|JN.1|EPI_ISL_18673715|2023-12-12|Poland	FG	EPI_ISL_18673715	Poland	2023-12-12	JN.1*	JN.1	JN.1	0	0.04	19	79	82.2917	19.7917
hCoV-19/Netherlands/NB-MVD-2300822/2023	FG|JN.1|EPI_ISL_18673732|2023-12-12|Netherlands	FG	EPI_ISL_18673732	Netherlands	2023-12-12	JN.1*	JN.1.19	JN.1.19	0	0.04	23	87	90.625	23.9583
hCoV-19/Netherlands/ZH-RIVM-135043/2023	FG|JN.1|EPI_ISL_18674245|2023-10-30|Netherlands	FG	EPI_ISL_18674245	Netherlands	2023-10-30	JN.1*	JN.1.19	JN.1.19	0	0.04	29	101	105.208	30.2083
hCoV-19/Scotland/CLIMB-CM7YRORW/2023	FG|JN.5|EPI_ISL_18684971|2023-12-06|United Kingdom	FG	EPI_ISL_18684971	United Kingdom	2023-12-06	JN.1*	JN.5	JN.5	0	0.04	28	94	97.9167	29.1667
hCoV-19/Scotland/CLIMB-CM7YF5RX/2023	FG|JN.1|EPI_ISL_18685007|2023-12-05|United Kingdom	FG	EPI_ISL_18685007	United Kingdom	2023-12-05	JN.1*	JN.1.36.1	JN.1	0	0.04	28	97	101.042	29.1667
hCoV-19/Scotland/CLIMB-CM7YJ9XN/2023	FG|JN.1|EPI_ISL_18685013|2023-12-06|United Kingdom	FG	EPI_ISL_18685013	United Kingdom	2023-12-06	JN.1*	JN.1	JN.1	0	0.04	28	95	98.9583	29.1667
hCoV-19/Russia/KLU-RII-MH151939S/2023	FG|BA.2.86.1|EPI_ISL_18685538|2023-11-16|Russia	FG	EPI_ISL_18685538	Russia	2023-11-16	JN.1*	BA.2.86.1	BA.2.86.1	0	0.04	30	86	89.5833	31.25
hCoV-19/USA/TX-HMH-M-136311/2023	MT|BA.2|EPI_ISL_18690080|2023-12-16|USA	MT	EPI_ISL_18690080	USA	2023-12-16	BA.2	BA.2	BA.2	0	0.04	17	91	94.7917	17.7083
hCoV-19/USA/MN-MDH-38605/2023	FG|JN.1|EPI_ISL_18693136|2023-12-07|USA	FG	EPI_ISL_18693136	USA	2023-12-07	JN.1*	JN.1	JN.1	0	0.04	29	91	94.7917	30.2083
hCoV-19/USA/MN-MDH-38727/2023	FG|JN.1|EPI_ISL_18699816|2023-11-29|USA	FG	EPI_ISL_18699816	USA	2023-11-29	JN.1*	JN.1	JN.1	0	0.04	29	92	95.8333	30.2083
hCoV-19/Malaysia/MGVI_GV0202/2023	FG|JN.1|EPI_ISL_18701251|2023-11-05|Malaysia	FG	EPI_ISL_18701251	Malaysia	2023-11-05	JN.1*	JN.1	JN.1	0	0.04	30	98	102.083	31.25
hCoV-19/Norway/Ahus-5512/2023	FG|JN.1|EPI_ISL_18701317|2023-12-19|Norway	FG	EPI_ISL_18701317	Norway	2023-12-19	JN.1*	JN.1	JN.1	0.666667	0.04	30	100	104.167	31.25
hCoV-19/Netherlands/ZH-RIVM-135495/2023	FG|BA.2.86.1|EPI_ISL_18701995|2023-12-06|Netherlands	FG	EPI_ISL_18701995	Netherlands	2023-12-06	JN.1*	BA.2.86.1	BA.2.86.1	0	0.04	29	95	98.9583	30.2083
hCoV-19/Israel/SMC-7116391/2023	FG|JN.1|EPI_ISL_18706507|2023-12-20|Israel	FG	EPI_ISL_18706507	Israel	2023-12-20	JN.1*	JN.1.4.5	JN.1.4	0	0.04	25	94	97.9167	26.0417
hCoV-19/USA/IL-C23WGS3668/2023	MT|BA.2|EPI_ISL_18709742|2023-12-11|USA	MT	EPI_ISL_18709742	USA	2023-12-11	JN.1*	BA.2	BA.2	0	0.04	19	77	80.2083	19.7917
hCoV-19/England/CLIMB-CM7YK5JA/2023	FG|JN.1|EPI_ISL_18712624|2023-12-25|United_Kingdom	FG	EPI_ISL_18712624	United_Kingdom	2023-12-25	JN.1*	JN.1	JN.1	0	0.04	28	88	91.6667	29.1667
hCoV-19/USA/OH-ODH-SC3033806/2023	FG|JN.1|EPI_ISL_18714208|2023-12-11|USA	FG	EPI_ISL_18714208	USA	2023-12-11	JN.1*	JN.1.39	JN.1	0	0.04	30	96	100	31.25
hCoV-19/USA/MN-MDH-39082/2023	FG|JN.1|EPI_ISL_18720144|2023-12-14|USA	FG	EPI_ISL_18720144	USA	2023-12-14	JN.1*	JN.1	JN.1	0	0.04	29	92	95.8333	30.2083
hCoV-19/Indonesia/BA-BIOKES-W04137/2023	MT|BA.2|EPI_ISL_18721816|2023-12-12|Indonesia	MT	EPI_ISL_18721816	Indonesia	2023-12-12	Others	BA.2	BA.2	0	0.04	10	65	67.7083	10.4167
hCoV-19/USA/IL-C23WGS3733/2023	MT|BA.2|EPI_ISL_18742670|2023-12-27|USA	MT	EPI_ISL_18742670	USA	2023-12-27	BA.2	BA.2	JN.1.8.1	0	0.04	20	86	89.5833	20.8333
hCoV-19/USA/TX-HMH-M-136916/2023	MT|BA.2|EPI_ISL_18743044|2023-12-28|USA	MT	EPI_ISL_18743044	USA	2023-12-28	BA.2	BA.2	BA.2	0	0.04	13	71	73.9583	13.5417
hCoV-19/USA/TX-HMH-M-136933/2023	MT|BA.2|EPI_ISL_18743099|2023-12-27|USA	MT	EPI_ISL_18743099	USA	2023-12-27	BA.2	BA.2	BA.2	0	0.04	10	72	75	10.4167
hCoV-19/USA/TX-HMH-M-137125/2023	MT|BA.2|EPI_ISL_18743290|2023-12-29|USA	MT	EPI_ISL_18743290	USA	2023-12-29	BA.2	BA.2	BA.2	0.5	0.04	17	76	79.1667	17.7083
hCoV-19/USA/TX-HMH-M-136497/2023	MT|BA.2|EPI_ISL_18743431|2023-12-19|USA	MT	EPI_ISL_18743431	USA	2023-12-19	BA.2	BA.2	BA.2	0	0.04	11	74	77.0833	11.4583
hCoV-19/USA/TX-HMH-M-136456/2023	MT|BA.2|EPI_ISL_18743582|2023-12-19|USA	MT	EPI_ISL_18743582	USA	2023-12-19	BA.2	BA.2	BA.2	0	0.04	16	56	58.3333	16.6667
hCoV-19/USA/TX-HMH-M-136722/2023	MT|BA.2|EPI_ISL_18743606|2023-12-23|USA	MT	EPI_ISL_18743606	USA	2023-12-23	BA.2	BA.2	BA.2	0	0.04	13	77	80.2083	13.5417
hCoV-19/USA/TX-HMH-M-136762/2023	MT|BA.2|EPI_ISL_18743646|2023-12-25|USA	MT	EPI_ISL_18743646	USA	2023-12-25	BA.2	BA.2	BA.2	0	0.04	16	45	46.875	16.6667
hCoV-19/Italy/LOM_Niguarda_80356239VIC/2024	MT|BA.2|EPI_ISL_18792828|2024-01-08|Italy	MT	EPI_ISL_18792828	Italy	2024-01-08	BA.2	BA.2	BA.2	0	0.04	17	74	77.0833	17.7083
hCoV-19/Italy/LOM_Niguarda_45110424VIL/2024	MT|BA.2|EPI_ISL_18792829|2024-01-04|Italy	MT	EPI_ISL_18792829	Italy	2024-01-04	BA.2	BA.2	BA.2	0	0.04	16	74	77.0833	16.6667
hCoV-19/India/MH-Pune-INSACOG_RF_WT-NCL-4890/2022	MT|BA.2|EPI_ISL_18819872|2022-08-12|India	MT	EPI_ISL_18819872	India	2022-08-12	BA.2	BA.2	BA.2	0	0.04	2	57	59.375	2.08333
hCoV-19/India/MH-Pune-INSACOG_RF_WT-NCL-4970/2022	MT|BA.2|EPI_ISL_18819946|2022-08-12|India	MT	EPI_ISL_18819946	India	2022-08-12	BA.2	BA.2	BA.2.75	0.666667	0.04	2	55	57.2917	2.08333
hCoV-19/France/CVL-ChuTo-9800123145/2023	FG|JN.1|EPI_ISL_18831607|2023-01-03|France	FG	EPI_ISL_18831607	France	2023-01-03	JN.1*	JN.1.32	XDK	0	0.04	22	85	88.5417	22.9167
hCoV-19/France/CVL-ChuTo-287446/2023	FG|JN.1|EPI_ISL_18831611|2023-01-03|France	FG	EPI_ISL_18831611	France	2023-01-03	Others	JN.1	JN.1	0.5	0.04	26	96	100	27.0833
hCoV-19/USA/IL-C24WGS78/2024	MT|BA.2|EPI_ISL_18836045|2024-01-02|USA	MT	EPI_ISL_18836045	USA	2024-01-02	BA.2	BA.2	JN.1	0	0.04	20	80	83.3333	20.8333
hCoV-19/Italy/CAM-TIGEM-IZSM-COLLI-49101/2024	MT|BA.2|EPI_ISL_18837902|2024-01|Italy	MT	EPI_ISL_18837902	Italy	2024-01	BA.2	BA.2	BA.2	0.5	0.04	14	77	80.2083	14.5833
hCoV-19/USA/IL-C24WGS249/2024	MT|BA.2|EPI_ISL_18872631|2024-01-23|USA	MT	EPI_ISL_18872631	USA	2024-01-23	BA.2	BA.2	BA.2	0.5	0.04	20	80	83.3333	20.8333
hCoV-19/South Korea/KDCA283769/2024	MT|BA.2|EPI_ISL_18887780|2024-01-15|South_Korea	MT	EPI_ISL_18887780	South_Korea	2024-01-15	JN.1*	BA.2	XDD	0	0.04	13	76	79.1667	13.5417
hCoV-19/South Korea/KDCA283769/2024	MT|BA.2|EPI_ISL_18887780|2024-01-15|South_Korea	MT	EPI_ISL_18887780	South_Korea	2024-01-15	BA.2	BA.2	XDD	0	0.04	13	76	79.1667	13.5417
hCoV-19/USA/TX-PHH-CS-03207/2023	MT|BA.2|EPI_ISL_18908998|2023-12-31|USA	MT	EPI_ISL_18908998	USA	2023-12-31	JN.1*	BA.2	BA.2	0	0.04	9	58	60.4167	9.375
hCoV-19/USA/TX-PHH-CS-03207/2023	MT|BA.2|EPI_ISL_18908998|2023-12-31|USA	MT	EPI_ISL_18908998	USA	2023-12-31	BA.2	BA.2	BA.2	0	0.04	9	58	60.4167	9.375
hCoV-19/USA/CA-SEARCH-139529/2023	MT|BA.2|EPI_ISL_18912845|2023-12-12|USA	MT	EPI_ISL_18912845	USA	2023-12-12	BA.2	BA.2	BA.2	0	0.04	17	94	97.9167	17.7083
hCoV-19/USA/CA-SEARCH-139529/2023	MT|BA.2|EPI_ISL_18912845|2023-12-12|USA	MT	EPI_ISL_18912845	USA	2023-12-12	BA.2	BA.2	BA.2	0	0.04	17	94	97.9167	17.7083
hCoV-19/Canada/ON-PHL-202405297-v2/2024	MT|BA.2|EPI_ISL_18914183|2024-02-08|Canada	MT	EPI_ISL_18914183	Canada	2024-02-08	BA.2	BA.2	JN.1.1	0	0.04	15	83	86.4583	15.625
hCoV-19/Canada/ON-PHL-202405297-v2/2024	MT|BA.2|EPI_ISL_18914183|2024-02-08|Canada	MT	EPI_ISL_18914183	Canada	2024-02-08	BA.2	BA.2	JN.1.1	0	0.04	15	83	86.4583	15.625
hCoV-19/Belgium/UZA-UA-CV8521718263/2022	MT|BA.2|EPI_ISL_9906124|2022-02-05|Belgium	MT	EPI_ISL_9906124	Belgium	2022-02-05	BA.2	BA.2	BA.2	0.5	0.04	1	58	60.4167	1.04167
hCoV-19/Belgium/UZA-UA-CV8521718263/2022	MT|BA.2|EPI_ISL_9906124|2022-02-05|Belgium	MT	EPI_ISL_9906124	Belgium	2022-02-05	BA.2	BA.2	BA.2	0.5	0.04	1	58	60.4167	1.04167
hCoV-19/France/HDF-HMN-22022010054/2022	MT|BA.2|EPI_ISL_9971151|2022-01-23|France	MT	EPI_ISL_9971151	France	2022-01-23	BA.2	BA.2	BA.2	0	0.04	0	58	60.4167	0
hCoV-19/France/HDF-HMN-22022010054/2022	MT|BA.2|EPI_ISL_9971151|2022-01-23|France	MT	EPI_ISL_9971151	France	2022-01-23	BA.2	BA.2	BA.2	0	0.04	0	58	60.4167	0
hCoV-19/England/LSPA-3763CAD/2022	MT|BA.2|EPI_ISL_10288734|2022-02-14|England	MT	EPI_ISL_10288734	England	2022-02-14	BA.2	BA.2	BA.2	0	0.03	1	56	57.732	1.03093
hCoV-19/England/ALDP-3787B5B/2022	MT|BA.2|EPI_ISL_10338121|2022-02-17|England	MT	EPI_ISL_10338121	England	2022-02-17	BA.2	BA.2	BA.2	0	0.03	0	58	59.7938	0
hCoV-19/England/DHSC-CYNHUMO/2022	MT|BA.2|EPI_ISL_10381743|2022-01-18|England	MT	EPI_ISL_10381743	England	2022-01-18	BA.2	BA.2	BA.2	0	0.03	1	54	55.6701	1.03093
hCoV-19/England/LSPA-37E9E30/2022	MT|BA.2|EPI_ISL_10413646|2022-02-20|England	MT	EPI_ISL_10413646	England	2022-02-20	BA.2	BA.2	BA.2	0.333333	0.03	0	81	83.5052	0
hCoV-19/England/MILK-37D307F/2022	MT|BA.2|EPI_ISL_10415895|2022-02-21|England	MT	EPI_ISL_10415895	England	2022-02-21	BA.2	BA.2	BA.2	0	0.03	0	63	64.9485	0
hCoV-19/India/RJ-SMS-ICMR-INSACOG-TS-10379/2022	MT|BA.2|EPI_ISL_10523851|2022-02-16|India	MT	EPI_ISL_10523851	India	2022-02-16	BA.2	BA.2	BA.2	0	0.03	0	42	43.299	0
hCoV-19/Sweden/DA10429671/2022	MT|BA.2|EPI_ISL_10595905|2022-02-08|Sweden	MT	EPI_ISL_10595905	Sweden	2022-02-08	BA.2	BA.2	BA.2	0.25	0.03	1	45	46.3918	1.03093
hCoV-19/England/BRBR-38BA909/2022	MT|BA.2|EPI_ISL_10735862|2022-03-01|England	MT	EPI_ISL_10735862	England	2022-03-01	BA.2	BA.2	BA.2	0	0.03	0	57	58.7629	0
hCoV-19/England/MILK-38A2A6B/2022	MT|BA.2|EPI_ISL_10736193|2022-02-28|England	MT	EPI_ISL_10736193	England	2022-02-28	BA.2	BA.2	BA.2	0	0.03	0	63	64.9485	0
hCoV-19/France/OCC-CERBAHC-02202290/2022	MT|BA.2|EPI_ISL_10754308|2022-02-11|France	MT	EPI_ISL_10754308	France	2022-02-11	BA.2	BA.2	BA.2	0	0.03	0	51	52.5773	0
hCoV-19/India/RJ-SMS-ICMR-INSACOG-TS-7746/2022	MT|BA.2|EPI_ISL_10762179|2022-01-31|India	MT	EPI_ISL_10762179	India	2022-01-31	BA.2	BA.2	BA.2	0	0.03	0	50	51.5464	0
hCoV-19/India/RJ-SMS-ICMR-INSACOG-TS-8476/2022	MT|BA.2|EPI_ISL_10766136|2022-02-07|India	MT	EPI_ISL_10766136	India	2022-02-07	BA.2	BA.2	BA.2	0.25	0.03	0	51	52.5773	0
hCoV-19/USA/VT-CDCBI-CRSP_YCK7HGLJKAP4J56T/2022	MT|BA.2|EPI_ISL_10872835|2022-02-22|USA	MT	EPI_ISL_10872835	USA	2022-02-22	BA.2	BA.2	BA.2	0	0.03	1	62	63.9175	1.03093
hCoV-19/Germany/BB-RKI-I-601605/2022	MT|BA.2|EPI_ISL_10916795|2022-02-24|Germany	MT	EPI_ISL_10916795	Germany	2022-02-24	BA.2	BA.2	BA.2	0	0.03	0	56	57.732	0
hCoV-19/England/MILK-3933FC9/2022	MT|BA.2|EPI_ISL_10964609|2022-03-05|England	MT	EPI_ISL_10964609	England	2022-03-05	BA.2	BA.2	BA.2	0	0.03	0	62	63.9175	0
hCoV-19/England/PHEC-YYDBSCP/2022	MT|BA.2|EPI_ISL_11003489|2022-02-22|England	MT	EPI_ISL_11003489	England	2022-02-22	BA.2	BA.2	BA.2	0	0.03	0	56	57.732	0
hCoV-19/India/RJ-SMS-ICMR-INSACOG-TS-6736/2022	MT|BA.2|EPI_ISL_11023366|2022-01-22|India	MT	EPI_ISL_11023366	India	2022-01-22	BA.2	BA.2	BA.2	0	0.03	0	41	42.268	0
hCoV-19/England/BRBR-39FCA43/2022	MT|BA.2|EPI_ISL_11077928|2022-03-10|England	MT	EPI_ISL_11077928	England	2022-03-10	BA.2	BA.2	BA.2	0	0.03	0	54	55.6701	0
hCoV-19/England/NEWC-39F1747/2022	MT|BA.2|EPI_ISL_11079722|2022-03-09|England	MT	EPI_ISL_11079722	England	2022-03-09	BA.2	BA.2	BA.2	0	0.03	0	59	60.8247	0
hCoV-19/Wales/LSPA-39EA987/2022	MT|BA.2|EPI_ISL_11085402|2022-03-09|Wales	MT	EPI_ISL_11085402	Wales	2022-03-09	BA.2	BA.2	BA.2	0	0.03	0	55	56.701	0
hCoV-19/England/BRBR-3A50341/2022	MT|BA.2|EPI_ISL_11150282|2022-03-11|England	MT	EPI_ISL_11150282	England	2022-03-11	BA.2	BA.2	BA.2	0	0.03	0	59	60.8247	0
hCoV-19/England/LSPA-3A70E77/2022	MT|BA.2|EPI_ISL_11182104|2022-03-12|England	MT	EPI_ISL_11182104	England	2022-03-12	BA.2	BA.2	BA.2	0	0.03	0	59	60.8247	0
hCoV-19/Poland/PZH-UMB-17801/2022	MT|BA.2|EPI_ISL_11234461|2022-03-10|Poland	MT	EPI_ISL_11234461	Poland	2022-03-10	BA.2	BA.2.65 (consensus call)	BA.2	0	0.03	0	55	56.701	0
hCoV-19/Austria/KILM2470/2022	MT|BA.2|EPI_ISL_11272994|2022-03|Austria	MT	EPI_ISL_11272994	Austria	2022-03	BA.2	BA.2	BA.2	0	0.03	0	62	63.9175	0
hCoV-19/England/LSPA-3A738D0/2022	MT|BA.2|EPI_ISL_11274795|2022-03-12|England	MT	EPI_ISL_11274795	England	2022-03-12	BA.2	BA.2	BA.2	0	0.03	0	60	61.8557	0
hCoV-19/England/BRBR-3A73F08/2022	MT|BA.2|EPI_ISL_11274951|2022-03-12|England	MT	EPI_ISL_11274951	England	2022-03-12	BA.2	BA.2	BA.2	0.333333	0.03	0	80	82.4742	0
hCoV-19/Estonia/RC0593695/2022	MT|BA.2|EPI_ISL_11287516|2022-02-26|Estonia	MT	EPI_ISL_11287516	Estonia	2022-02-26	BA.2	BA.2	BA.2	0	0.03	1	58	59.7938	1.03093
hCoV-19/England/LSPA-3B34166/2022	MT|BA.2|EPI_ISL_11335357|2022-03-17|England	MT	EPI_ISL_11335357	England	2022-03-17	BA.2	BA.2	BA.2	0	0.03	0	64	65.9794	0
hCoV-19/Belgium/AZDelta-2211-05651/2022	MT|BA.2|EPI_ISL_11351558|2022-03-18|Belgium	MT	EPI_ISL_11351558	Belgium	2022-03-18	BA.2	BA.2	BA.2	0	0.03	1	51	52.5773	1.03093
hCoV-19/England/PLYM-3B571E5/2022	MT|BA.2|EPI_ISL_11391151|2022-03-17|England	MT	EPI_ISL_11391151	England	2022-03-17	BA.2	BA.2	BA.2	0	0.03	0	59	60.8247	0
hCoV-19/England/PLYM-3B83924/2022	MT|BA.2|EPI_ISL_11416653|2022-03-20|England	MT	EPI_ISL_11416653	England	2022-03-20	BA.2	BA.2	BA.2	0	0.03	0	59	60.8247	0
hCoV-19/England/PLYM-3BCB146/2022	MT|BA.2|EPI_ISL_11447562|2022-03-21|England	MT	EPI_ISL_11447562	England	2022-03-21	BA.2	BA.2	BA.2	0	0.03	0	59	60.8247	0
hCoV-19/Germany/NW-RKI-I-614384/2022	MT|BA.2|EPI_ISL_11455127|2022-03-03|Germany	MT	EPI_ISL_11455127	Germany	2022-03-03	BA.2	BA.2	BA.2	0	0.03	0	62	63.9175	0
hCoV-19/Germany/NW-RKI-I-614615/2022	MT|BA.2|EPI_ISL_11455395|2022-03-02|Germany	MT	EPI_ISL_11455395	Germany	2022-03-02	BA.2	BA.2	BA.2	0	0.03	0	63	64.9485	0
hCoV-19/Germany/NW-RKI-I-614627/2022	MT|BA.2|EPI_ISL_11455410|2022-03-04|Germany	MT	EPI_ISL_11455410	Germany	2022-03-04	BA.2	BA.2	BA.2	0	0.03	0	62	63.9175	0
hCoV-19/Germany/BW-RKI-I-624761/2022	MT|BA.2|EPI_ISL_11467804|2022-02-20|Germany	MT	EPI_ISL_11467804	Germany	2022-02-20	BA.2	BA.2	BA.2	0	0.03	1	60	61.8557	1.03093
hCoV-19/Denmark/DCGC-452617/2022	MT|BA.2|EPI_ISL_11550078|2022-03-23|Denmark	MT	EPI_ISL_11550078	Denmark	2022-03-23	BA.2	BA.2	BA.2	0	0.03	0	54	55.6701	0
hCoV-19/England/PLYM-3BC99B9/2022	MT|BA.2|EPI_ISL_11552943|2022-03-21|England	MT	EPI_ISL_11552943	England	2022-03-21	BA.2	BA.2	BA.2	0	0.03	0	60	61.8557	0
hCoV-19/England/PLYM-3BC9694/2022	MT|BA.2|EPI_ISL_11553004|2022-03-21|England	MT	EPI_ISL_11553004	England	2022-03-21	BA.2	BA.2	BA.2	0	0.03	0	60	61.8557	0
hCoV-19/Germany/NW-RKI-I-644079/2022	MT|BA.2|EPI_ISL_11591494|2022-02-25|Germany	MT	EPI_ISL_11591494	Germany	2022-02-25	BA.2	BA.2	BA.2	0	0.03	0	62	63.9175	0
hCoV-19/England/LSPA-3C332BE/2022	MT|BA.2|EPI_ISL_11594593|2022-03-24|England	MT	EPI_ISL_11594593	England	2022-03-24	BA.2	BA.2	BA.2	0	0.03	0	61	62.8866	0
hCoV-19/England/PLYM-3C3593F/2022	MT|BA.2|EPI_ISL_11594807|2022-03-23|England	MT	EPI_ISL_11594807	England	2022-03-23	BA.2	BA.2	BA.2	0	0.03	1	59	60.8247	1.03093
hCoV-19/Germany/BY-RKI-I-649620/2022	MT|BA.2|EPI_ISL_11601417|2022-01-28|Germany	MT	EPI_ISL_11601417	Germany	2022-01-28	BA.2	BA.2	BA.2	0	0.03	0	40	41.2371	0
hCoV-19/England/LSPA-3C60CC9/2022	MT|BA.2|EPI_ISL_11640678|2022-03-24|England	MT	EPI_ISL_11640678	England	2022-03-24	BA.2	BA.2	BA.2	0	0.03	0	59	60.8247	0
hCoV-19/Germany/BW-RKI-I-667497/2022	MT|BA.2|EPI_ISL_11643316|2022-03-03|Germany	MT	EPI_ISL_11643316	Germany	2022-03-03	BA.2	BA.2	BA.2	0	0.03	1	58	59.7938	1.03093
hCoV-19/Germany/RP-RKI-I-670569/2022	MT|BA.2|EPI_ISL_11653232|2022-03-15|Germany	MT	EPI_ISL_11653232	Germany	2022-03-15	BA.2	BA.2	BA.2	0	0.03	1	55	56.701	1.03093
hCoV-19/England/PLYM-3C2539E/2022	MT|BA.2|EPI_ISL_11654312|2022-03-23|England	MT	EPI_ISL_11654312	England	2022-03-23	BA.2	BA.2	BA.2	0	0.03	1	58	59.7938	1.03093
hCoV-19/Germany/RP-RKI-I-681692/2022	MT|BA.2|EPI_ISL_11667638|2022-03-09|Germany	MT	EPI_ISL_11667638	Germany	2022-03-09	BA.2	BA.2	BA.2	0	0.03	0	56	57.732	0
hCoV-19/England/LSPA-3CA1E3F/2022	MT|BA.2|EPI_ISL_11698798|2022-03-25|England	MT	EPI_ISL_11698798	England	2022-03-25	BA.2	BA.2	BA.2	0	0.03	0	60	61.8557	0
hCoV-19/England/LSPA-3CA1E02/2022	MT|BA.2|EPI_ISL_11698818|2022-03-25|England	MT	EPI_ISL_11698818	England	2022-03-25	BA.2	BA.2	BA.2	0	0.03	0	59	60.8247	0
hCoV-19/England/LSPA-3CC22A5/2022	MT|BA.2|EPI_ISL_11728630|2022-03-26|England	MT	EPI_ISL_11728630	England	2022-03-26	BA.2	BA.2	BA.2	0	0.03	0	59	60.8247	0
hCoV-19/England/LSPA-3CBFB19/2022	MT|BA.2|EPI_ISL_11728911|2022-03-27|England	MT	EPI_ISL_11728911	England	2022-03-27	BA.2	BA.2	BA.2	0.333333	0.03	0	81	83.5052	0
hCoV-19/England/PHEC-YYDI1WZ/2022	MT|BA.2|EPI_ISL_11744121|2022-03-14|England	MT	EPI_ISL_11744121	England	2022-03-14	BA.2	BA.2	BA.2	0	0.03	1	60	61.8557	1.03093
hCoV-19/Canada/ON-PHL-22-16541/2022	MT|BA.2|EPI_ISL_11763225|2022-03-23|Canada	MT	EPI_ISL_11763225	Canada	2022-03-23	BA.2	BA.2	BA.2	0	0.03	1	59	60.8247	1.03093
hCoV-19/Scotland/QEUH-3C8B5AF/2022	MT|BA.2|EPI_ISL_11774809|2022-03-27|Scotland	MT	EPI_ISL_11774809	Scotland	2022-03-27	BA.2	BA.2	BA.2	0	0.03	0	57	58.7629	0
hCoV-19/Germany/RP-RKI-I-695355/2022	MT|BA.2|EPI_ISL_11821790|2022-03-22|Germany	MT	EPI_ISL_11821790	Germany	2022-03-22	BA.2	BA.2	BA.2	0	0.03	1	52	53.6082	1.03093
hCoV-19/Sweden/22-128593/2022	MT|BA.2|EPI_ISL_11845292|2022-03-12|Sweden	MT	EPI_ISL_11845292	Sweden	2022-03-12	BA.2	BA.2	BA.2	0	0.03	0	50	51.5464	0
hCoV-19/Slovakia/BA_22_00022344/2022	MT|BA.2|EPI_ISL_11881036|2022-03-12|Slovakia	MT	EPI_ISL_11881036	Slovakia	2022-03-12	BA.2	BA.2	BA.2	0	0.03	0	56	57.732	0
hCoV-19/Slovakia/BA_22_00022346/2022	MT|BA.2|EPI_ISL_11881038|2022-03-12|Slovakia	MT	EPI_ISL_11881038	Slovakia	2022-03-12	BA.2	BA.2	BA.2	0	0.03	0	57	58.7629	0
hCoV-19/India/RJ-SMS-ICMR-INSACOG-TS-12861/2022	MT|BA.2|EPI_ISL_11881810|2022-03-11|India	MT	EPI_ISL_11881810	India	2022-03-11	BA.2	BA.2	BA.2	0	0.03	0	44	45.3608	0
hCoV-19/England/LSPA-3D1B549/2022	MT|BA.2|EPI_ISL_11916704|2022-04-04|England	MT	EPI_ISL_11916704	England	2022-04-04	BA.2	BA.2	BA.2	0	0.03	0	58	59.7938	0
hCoV-19/England/LSPA-3D1CE98/2022	MT|BA.2|EPI_ISL_11916883|2022-04-03|England	MT	EPI_ISL_11916883	England	2022-04-03	BA.2	BA.2	BA.2	0	0.03	0	60	61.8557	0
hCoV-19/Scotland/QEUH-3D0B807/2022	MT|BA.2|EPI_ISL_11918696|2022-03-31|Scotland	MT	EPI_ISL_11918696	Scotland	2022-03-31	BA.2	BA.2	BA.2	0	0.03	0	58	59.7938	0
hCoV-19/Portugal/PT31550/2022	MT|BA.2|EPI_ISL_11941746|2022-03-29|Portugal	MT	EPI_ISL_11941746	Portugal	2022-03-29	BA.2	BA.2	BA.2	0	0.03	0	61	62.8866	0
hCoV-19/Portugal/PT31891/2022	MT|BA.2|EPI_ISL_11942072|2022-03-29|Portugal	MT	EPI_ISL_11942072	Portugal	2022-03-29	BA.2	BA.2	BA.2	0	0.03	0	62	63.9175	0
hCoV-19/Portugal/PT31895/2022	MT|BA.2|EPI_ISL_11942076|2022-03-29|Portugal	MT	EPI_ISL_11942076	Portugal	2022-03-29	BA.2	BA.2	BA.2	0	0.03	0	58	59.7938	0
hCoV-19/Israel/ICH-741211654/2022	MT|BA.2|EPI_ISL_11969899|2022-03-26|Israel	MT	EPI_ISL_11969899	Israel	2022-03-26	BA.2	BA.2	BA.2	0	0.03	0	63	64.9485	0
hCoV-19/England/PHEC-YYRYHAX/2022	MT|BA.2|EPI_ISL_11996787|2022-03-25|England	MT	EPI_ISL_11996787	England	2022-03-25	BA.2	BA.2	BA.2	0	0.03	1	63	64.9485	1.03093
hCoV-19/Germany/BY-RKI-I-714437/2022	MT|BA.2|EPI_ISL_12027067|2022-03-19|Germany	MT	EPI_ISL_12027067	Germany	2022-03-19	BA.2	BA.2	BA.2	0	0.03	1	48	49.4845	1.03093
hCoV-19/Wales/PHWC-PJWSG1/2022	MT|BA.2|EPI_ISL_12032363|2022-03-23|Wales	MT	EPI_ISL_12032363	Wales	2022-03-23	BA.2	BA.2	BA.2	0	0.03	1	61	62.8866	1.03093
hCoV-19/USA/CO-CDPHE-2103102035/2022	MT|BA.2|EPI_ISL_12034906|2022-03-29|USA	MT	EPI_ISL_12034906	USA	2022-03-29	BA.2	BA.2	BA.2	0	0.03	1	61	62.8866	1.03093
hCoV-19/Scotland/EDB53918/2022	MT|BA.2|EPI_ISL_12042977|2022-03-22|Scotland	MT	EPI_ISL_12042977	Scotland	2022-03-22	BA.2	BA.2	BA.2	0	0.03	0	60	61.8557	0
hCoV-19/USA/TX-CDC-ASC210721742/2022	MT|BA.2|EPI_ISL_12053469|2022-03-31|USA	MT	EPI_ISL_12053469	USA	2022-03-31	BA.2	BA.2	BA.2	0	0.03	0	58	59.7938	0
hCoV-19/England/PHEC-YYR89R8/2022	MT|BA.2|EPI_ISL_12075757|2022-03-28|England	MT	EPI_ISL_12075757	England	2022-03-28	BA.2	BA.2	BA.2	0	0.03	0	58	59.7938	0
hCoV-19/England/PHEC-YYRD9SK/2022	MT|BA.2|EPI_ISL_12076922|2022-03-24|England	MT	EPI_ISL_12076922	England	2022-03-24	BA.2	BA.2	BA.2	0	0.03	0	58	59.7938	0
hCoV-19/England/PHEC-YYRC1AB/2022	MT|BA.2|EPI_ISL_12102391|2022-03-30|England	MT	EPI_ISL_12102391	England	2022-03-30	BA.2	BA.2	BA.2	0	0.03	0	61	62.8866	0
hCoV-19/England/PHEC-YYRJAJY/2022	MT|BA.2|EPI_ISL_12103831|2022-03-04|England	MT	EPI_ISL_12103831	England	2022-03-04	BA.2	BA.2	BA.2	0	0.03	0	58	59.7938	0
hCoV-19/France/PAC-CERBAHC-03916849/2022	MT|BA.2|EPI_ISL_12140285|2022-03-28|France	MT	EPI_ISL_12140285	France	2022-03-28	BA.2	BA.2	BA.2	0	0.03	0	51	52.5773	0
hCoV-19/Germany/BW-RKI-I-716438/2022	MT|BA.2|EPI_ISL_12185828|2022-03-20|Germany	MT	EPI_ISL_12185828	Germany	2022-03-20	BA.2	BA.2	BA.2	0	0.03	0	58	59.7938	0
hCoV-19/Germany/BW-RKI-I-717057/2022	MT|BA.2|EPI_ISL_12186459|2022-03-20|Germany	MT	EPI_ISL_12186459	Germany	2022-03-20	BA.2	BA.2	BA.2	0	0.03	0	63	64.9485	0
hCoV-19/Germany/NI-RKI-I-720600/2022	MT|BA.2|EPI_ISL_12189148|2022-03-31|Germany	MT	EPI_ISL_12189148	Germany	2022-03-31	BA.2	BA.2	BA.2	0.5	0.03	0	53	54.6392	0
hCoV-19/Germany/HH-RKI-I-725149/2022	MT|BA.2|EPI_ISL_12194316|2022-03-25|Germany	MT	EPI_ISL_12194316	Germany	2022-03-25	BA.2	BA.2	BA.2.65	0.5	0.03	1	56	57.732	1.03093
hCoV-19/Germany/NW-RKI-I-725419/2022	MT|BA.2|EPI_ISL_12194624|2022-04-06|Germany	MT	EPI_ISL_12194624	Germany	2022-04-06	BA.2	BA.2	BA.2	0	0.03	0	56	57.732	0
hCoV-19/Germany/SH-RKI-I-729150/2022	MT|BA.2|EPI_ISL_12198511|2022-04-04|Germany	MT	EPI_ISL_12198511	Germany	2022-04-04	BA.2	BA.2	BA.2	0	0.03	0	64	65.9794	0
hCoV-19/Germany/NW-RKI-I-730547/2022	MT|BA.2|EPI_ISL_12199711|2022-04-09|Germany	MT	EPI_ISL_12199711	Germany	2022-04-09	BA.2	BA.2	BA.2	0.333333	0.03	0	54	55.6701	0
hCoV-19/England/PHEC-YYRO3R4/2022	MT|BA.2|EPI_ISL_12204096|2022-03-30|England	MT	EPI_ISL_12204096	England	2022-03-30	BA.2	BA.2	BA.2	0.333333	0.03	0	61	62.8866	0
hCoV-19/Scotland/EDB55571/2022	MT|BA.2|EPI_ISL_12221202|2022-03-28|Scotland	MT	EPI_ISL_12221202	Scotland	2022-03-28	BA.2	BA.2	BA.2	0	0.03	0	59	60.8247	0
hCoV-19/England/PHEC-YYR1FH3/2022	MT|BA.2|EPI_ISL_12221897|2022-04-03|England	MT	EPI_ISL_12221897	England	2022-04-03	BA.2	BA.2	BA.2	0	0.03	0	56	57.732	0
hCoV-19/Netherlands/NH-NMDL-01572/2022	MT|BA.2|EPI_ISL_12222368|2022-04-03|Netherlands	MT	EPI_ISL_12222368	Netherlands	2022-04-03	BA.2	BA.2	BA.2	0.333333	0.03	0	59	60.8247	0
hCoV-19/England/PHEC-YYR1ZSU/2022	MT|BA.2|EPI_ISL_12222642|2022-04-07|England	MT	EPI_ISL_12222642	England	2022-04-07	BA.2	BA.2	BA.2	0	0.03	0	61	62.8866	0
hCoV-19/India/TG-GMCH-ICMR-INSACOG-KHB228740/2022	MT|BA.2|EPI_ISL_12223742|2022-04-11|India	MT	EPI_ISL_12223742	India	2022-04-11	BA.2	BA.2	BA.2	0	0.03	0	49	50.5155	0
hCoV-19/England/LSPA-3D84305/2022	MT|BA.2|EPI_ISL_12241242|2022-04-18|England	MT	EPI_ISL_12241242	England	2022-04-18	BA.2	BA.2	BA.2	0	0.03	0	64	65.9794	0
hCoV-19/France/OCC-ChuNim-2203281007/2022	MT|BA.2|EPI_ISL_12248913|2022-03-28|France	MT	EPI_ISL_12248913	France	2022-03-28	BA.2	BA.2	BA.2	0	0.03	0	50	51.5464	0
hCoV-19/France/OCC-ChuNim-2204041001/2022	MT|BA.2|EPI_ISL_12248914|2022-04-04|France	MT	EPI_ISL_12248914	France	2022-04-04	BA.2	BA.2	BA.2	0	0.03	0	44	45.3608	0
hCoV-19/Denmark/DCGC-483929/2022	MT|BA.2|EPI_ISL_12249280|2022-04-13|Denmark	MT	EPI_ISL_12249280	Denmark	2022-04-13	BA.2	BA.2	BA.2	0	0.03	0	61	62.8866	0
hCoV-19/South Korea/KDCA35672/2022	MT|BA.2|EPI_ISL_12249995|2022-03-24|South_Korea	MT	EPI_ISL_12249995	South_Korea	2022-03-24	BA.2	BA.2	BA.2	0	0.03	1	60	61.8557	1.03093
hCoV-19/Spain/CT-BST9926620671/2022	MT|BA.2|EPI_ISL_12253961|2022-04-14|Spain	MT	EPI_ISL_12253961	Spain	2022-04-14	BA.2	BA.2	BA.2	0.25	0.03	0	59	60.8247	0
hCoV-19/Scotland/EDB56109/2022	MT|BA.2|EPI_ISL_12254922|2022-03-28|Scotland	MT	EPI_ISL_12254922	Scotland	2022-03-28	BA.2	BA.2	BA.2	0	0.03	0	58	59.7938	0
hCoV-19/Canada/ON-PHL-22-19570/2022	MT|BA.2|EPI_ISL_12266427|2022-04-13|Canada	MT	EPI_ISL_12266427	Canada	2022-04-13	BA.2	BA.2	BA.2	0	0.03	0	58	59.7938	0
hCoV-19/Wales/PHWC-PJZPKP/2022	MT|BA.2|EPI_ISL_12269673|2022-04-05|Wales	MT	EPI_ISL_12269673	Wales	2022-04-05	BA.2	BA.2	BA.2	0	0.03	0	61	62.8866	0
hCoV-19/Slovakia/BA_22_00025847/2022	MT|BA.2|EPI_ISL_12286479|2022-04-08|Slovakia	MT	EPI_ISL_12286479	Slovakia	2022-04-08	BA.2	BA.2	BA.2	0	0.03	0	62	63.9175	0
hCoV-19/India/TG-RFCH04962_CIC9124/2022	MT|BA.2|EPI_ISL_12305706|2022-01-20|India	MT	EPI_ISL_12305706	India	2022-01-20	BA.2	BA.2	BA.2	0	0.03	0	39	40.2062	0
hCoV-19/USA/CO-CDPHE-2103115806/2022	MT|BA.2|EPI_ISL_12328724|2022-03-29|USA	MT	EPI_ISL_12328724	USA	2022-03-29	BA.2	BA.2	BA.2	0	0.03	0	54	55.6701	0
hCoV-19/USA/CO-CDPHE-2103115714/2022	MT|BA.2|EPI_ISL_12328785|2022-04-04|USA	MT	EPI_ISL_12328785	USA	2022-04-04	BA.2	BA.2	BA.2	0	0.03	0	54	55.6701	0
hCoV-19/Germany/NI-RKI-I-732376/2022	MT|BA.2|EPI_ISL_12333403|2022-04-07|Germany	MT	EPI_ISL_12333403	Germany	2022-04-07	BA.2	BA.2	BA.2	0	0.03	1	50	51.5464	1.03093
hCoV-19/India/TN-CDFD-W6-62/2022	MT|BA.2|EPI_ISL_12354625|2022-04-08|India	MT	EPI_ISL_12354625	India	2022-04-08	BA.2	BA.2	BA.2	0	0.03	1	59	60.8247	1.03093
hCoV-19/India/RJ-SMS-ICMR-INSACOG-TS-13415/2022	MT|BA.2|EPI_ISL_12362100|2022-03-22|India	MT	EPI_ISL_12362100	India	2022-03-22	BA.2	BA.2	BA.2	0	0.03	1	45	46.3918	1.03093
hCoV-19/Germany/HB-RKI-I-752571/2022	MT|BA.2|EPI_ISL_12364032|2022-03-29|Germany	MT	EPI_ISL_12364032	Germany	2022-03-29	BA.2	BA.2	BA.2	0	0.03	0	55	56.701	0
hCoV-19/Sweden/DA10554939/2022	MT|BA.2|EPI_ISL_12409058|2022-02-28|Sweden	MT	EPI_ISL_12409058	Sweden	2022-02-28	BA.2	BA.2	BA.2	0	0.03	0	45	46.3918	0
hCoV-19/Sweden/21806339P/2022	MT|BA.2|EPI_ISL_12409672|2022-02-28|Sweden	MT	EPI_ISL_12409672	Sweden	2022-02-28	BA.2	BA.2	BA.2	0	0.03	0	48	49.4845	0
hCoV-19/Australia/ACT5015/2022	MT|BA.2|EPI_ISL_12434352|2022-04-10|Australia	MT	EPI_ISL_12434352	Australia	2022-04-10	BA.2	BA.2	BA.2	0	0.03	0	59	60.8247	0
hCoV-19/England/PHEP-YYR5C5N/2022	MT|BA.2|EPI_ISL_12448069|2022-04-15|England	MT	EPI_ISL_12448069	England	2022-04-15	BA.2	BA.2	BA.2	0	0.03	1	63	64.9485	1.03093
hCoV-19/Luxembourg/LNS0985686/2022	MT|BA.2|EPI_ISL_12448670|2022-04-14|Luxembourg	MT	EPI_ISL_12448670	Luxembourg	2022-04-14	BA.2	BA.2	BA.2	0	0.03	1	51	52.5773	1.03093
hCoV-19/Israel/ICH-741221362/2022	MT|BA.2|EPI_ISL_12456672|2022-04-18|Israel	MT	EPI_ISL_12456672	Israel	2022-04-18	BA.2	BA.2	BA.2	0	0.03	0	64	65.9794	0
hCoV-19/Canada/ON-PHL-22-20259/2022	MT|BA.2|EPI_ISL_12466326|2022-04-20|Canada	MT	EPI_ISL_12466326	Canada	2022-04-20	BA.2	BA.2	BA.2	0	0.03	0	58	59.7938	0
hCoV-19/France/PDL-LBZCentre-SG2204190013/2022	MT|BA.2|EPI_ISL_12472617|2022-04-19|France	MT	EPI_ISL_12472617	France	2022-04-19	BA.2	BA.2	BA.2	0	0.03	0	52	53.6082	0
hCoV-19/England/LSPA-3DD4FD5/2022	MT|BA.2|EPI_ISL_12477658|2022-04-26|England	MT	EPI_ISL_12477658	England	2022-04-26	BA.2	BA.2	BA.2	0	0.03	0	64	65.9794	0
hCoV-19/Germany/BE-RKI-I-771247/2022	MT|BA.2|EPI_ISL_12524699|2022-03-30|Germany	MT	EPI_ISL_12524699	Germany	2022-03-30	BA.2	BA.2	BA.2	0	0.03	1	60	61.8557	1.03093
hCoV-19/England/QEUH-3DA0330/2022	MT|BA.2|EPI_ISL_12549618|2022-04-20|England	MT	EPI_ISL_12549618	England	2022-04-20	BA.2	BA.2	BA.2	0.5	0.03	1	61	62.8866	1.03093
hCoV-19/England/QEUH-3D220D5/2022	MT|BA.2|EPI_ISL_12555970|2022-04-05|England	MT	EPI_ISL_12555970	England	2022-04-05	BA.2	BA.2	BA.2	0	0.03	1	60	61.8557	1.03093
hCoV-19/Indonesia/SB-NIHRD-WGS_22_04553/2022	MT|BA.2|EPI_ISL_12559839|2022-03-08|Indonesia	MT	EPI_ISL_12559839	Indonesia	2022-03-08	BA.2	BA.2	BA.2	0.166667	0.03	0	62	63.9175	0
hCoV-19/England/PHEP-YYRH9RH/2022	MT|BA.2|EPI_ISL_12561723|2022-03-30|England	MT	EPI_ISL_12561723	England	2022-03-30	BA.2	BA.2	BA.2	0	0.03	0	60	61.8557	0
hCoV-19/Northern Ireland/NIRE-01c220/2022	MT|BA.2|EPI_ISL_12581045|2022-03-12|Northern_Ireland	MT	EPI_ISL_12581045	Northern_Ireland	2022-03-12	BA.2	BA.2	BA.2	0	0.03	0	58	59.7938	0
hCoV-19/Turkey/HSGM-G8584/2022	MT|BA.2|EPI_ISL_12584007|2022-04-07|Turkey	MT	EPI_ISL_12584007	Turkey	2022-04-07	BA.2	BA.2	BA.2	0	0.03	0	67	69.0722	0
hCoV-19/France/IDF-LBZCentre-AE2204250071/2022	MT|BA.2|EPI_ISL_12587273|2022-04-25|France	MT	EPI_ISL_12587273	France	2022-04-25	BA.2	BA.2	BA.2	0	0.03	0	52	53.6082	0
hCoV-19/Belgium/AZDelta-2218-01595/2022	MT|BA.2|EPI_ISL_12588383|2022-05-04|Belgium	MT	EPI_ISL_12588383	Belgium	2022-05-04	BA.2	BA.2	BA.2	0	0.03	0	54	55.6701	0
hCoV-19/USA/NJ-CDC-LC0595892/2022	MT|BA.2|EPI_ISL_12595655|2022-04-26|USA	MT	EPI_ISL_12595655	USA	2022-04-26	BA.2	BA.2	BA.2	0.333333	0.03	0	53	54.6392	0
hCoV-19/Romania/BR-19090/2022	MT|BA.2|EPI_ISL_12603771|2022-04-13|Romania	MT	EPI_ISL_12603771	Romania	2022-04-13	BA.2	BA.2	BA.2	0	0.03	0	55	56.701	0
hCoV-19/USA/PA-BOL-M22073803/2022	MT|BA.2|EPI_ISL_12614241|2022-04-26|USA	MT	EPI_ISL_12614241	USA	2022-04-26	BA.2	BA.2	BA.2	0	0.03	0	55	56.701	0
hCoV-19/USA/NC-CDC-LC0597757/2022	MT|BA.2|EPI_ISL_12619316|2022-04-23|USA	MT	EPI_ISL_12619316	USA	2022-04-23	BA.2	BA.2	BA.2	0	0.03	0	60	61.8557	0
hCoV-19/USA/OR-CDC-LC0602735/2022	MT|BA.2|EPI_ISL_12621133|2022-04-26|USA	MT	EPI_ISL_12621133	USA	2022-04-26	BA.2	BA.2	BA.2	0	0.03	0	56	57.732	0
hCoV-19/France/NAQ-HCL722002492601/2022	MT|BA.2|EPI_ISL_12628795|2022-04-25|France	MT	EPI_ISL_12628795	France	2022-04-25	BA.2	BA.2	BA.2	0	0.03	0	61	62.8866	0
hCoV-19/France/NAQ-HCL722002513801/2022	MT|BA.2|EPI_ISL_12628926|2022-04-25|France	MT	EPI_ISL_12628926	France	2022-04-25	BA.2	BA.2	BA.2	0	0.03	0	63	64.9485	0
hCoV-19/Belgium/AZDelta-2218-06020c/2022	MT|BA.2|EPI_ISL_12642595|2022-05-10|Belgium	MT	EPI_ISL_12642595	Belgium	2022-05-10	BA.2	BA.2	BA.2	0	0.03	1	48	49.4845	1.03093
hCoV-19/England/PHEC-YYFNAHG/2022	MT|BA.2|EPI_ISL_12649324|2022-04-19|England	MT	EPI_ISL_12649324	England	2022-04-19	BA.2	BA.2	BA.2	0	0.03	0	59	60.8247	0
hCoV-19/USA/NY-UB-KSL-04791/2022	MT|BA.2|EPI_ISL_12652458|2022-03-18|USA	MT	EPI_ISL_12652458	USA	2022-03-18	BA.2	BA.2	BA.2	0	0.03	0	53	54.6392	0
hCoV-19/USA/NY-CDC-LC0605122/2022	MT|BA.2|EPI_ISL_12654570|2022-04-28|USA	MT	EPI_ISL_12654570	USA	2022-04-28	BA.2	BA.2	BA.2	0.5	0.03	1	56	57.732	1.03093
hCoV-19/Scotland/EDB59430/2022	MT|BA.2|EPI_ISL_12678784|2022-04-19|Scotland	MT	EPI_ISL_12678784	Scotland	2022-04-19	BA.2	BA.2	BA.2	0	0.03	0	58	59.7938	0
hCoV-19/France/OCC-HCL722002563301/2022	MT|BA.2|EPI_ISL_12699201|2022-05-02|France	MT	EPI_ISL_12699201	France	2022-05-02	BA.2	BA.2	BA.2	0	0.03	0	61	62.8866	0
hCoV-19/Czech Republic/CSQ7845/2022	MT|BA.2|EPI_ISL_12705053|2022-05-02|Czech_Republic	MT	EPI_ISL_12705053	Czech_Republic	2022-05-02	BA.2	BA.2	BA.2	0	0.03	0	60	61.8557	0
hCoV-19/Belgium/AZDelta-2218-09233/2022	MT|BA.2|EPI_ISL_12712879|2022-05-12|Belgium	MT	EPI_ISL_12712879	Belgium	2022-05-12	BA.2	BA.2	BA.2	0	0.03	1	49	50.5155	1.03093
hCoV-19/USA/MD-HP31295-PIDPKGFSNU/2022	MT|BA.2|EPI_ISL_12717217|2022-05-12|USA	MT	EPI_ISL_12717217	USA	2022-05-12	BA.2	BA.2	BA.2	0	0.03	1	59	60.8247	1.03093
hCoV-19/Germany/BE-RKI-I-793853/2022	MT|BA.2|EPI_ISL_12732263|2022-04-26|Germany	MT	EPI_ISL_12732263	Germany	2022-04-26	BA.2	BA.2	BA.2	0	0.03	1	55	56.701	1.03093
hCoV-19/Germany/NW-RKI-I-795986/2022	MT|BA.2|EPI_ISL_12735028|2022-05-08|Germany	MT	EPI_ISL_12735028	Germany	2022-05-08	BA.2	BA.2	BA.2	0	0.03	1	57	58.7629	1.03093
hCoV-19/Germany/BY-RKI-I-797847/2022	MT|BA.2|EPI_ISL_12736994|2022-05-08|Germany	MT	EPI_ISL_12736994	Germany	2022-05-08	BA.2	BA.2	BA.2	0	0.03	1	56	57.732	1.03093
hCoV-19/Scotland/EDB60121/2022	MT|BA.2|EPI_ISL_12749093|2022-04-20|Scotland	MT	EPI_ISL_12749093	Scotland	2022-04-20	BA.2	BA.2	BA.2	0	0.03	0	58	59.7938	0
hCoV-19/Greece/23180/2022	MT|BA.2|EPI_ISL_12785150|2022-04-18|Greece	MT	EPI_ISL_12785150	Greece	2022-04-18	BA.2	BA.2	BA.2	0	0.03	0	60	61.8557	0
hCoV-19/France/OCC-ChuNim-04161499/2022	MT|BA.2|EPI_ISL_12785776|2022-04-13|France	MT	EPI_ISL_12785776	France	2022-04-13	BA.2	BA.2	BA.2	0	0.03	0	56	57.732	0
hCoV-19/France/BFC-HMN-22042110446/2022	MT|BA.2|EPI_ISL_12789063|2022-03-28|France	MT	EPI_ISL_12789063	France	2022-03-28	BA.2	BA.2	BA.2	0	0.03	0	51	52.5773	0
hCoV-19/USA/CO-CDPHE-2103164980/2022	MT|BA.2|EPI_ISL_12801809|2022-04-20|USA	MT	EPI_ISL_12801809	USA	2022-04-20	BA.2	BA.2	BA.2	0	0.03	0	55	56.701	0
hCoV-19/Scotland/EDB59898/2022	MT|BA.2|EPI_ISL_12810333|2022-04-15|Scotland	MT	EPI_ISL_12810333	Scotland	2022-04-15	BA.2	BA.2	BA.2	0	0.03	0	58	59.7938	0
hCoV-19/Germany/BY-RKI-I-815201/2022	MT|BA.2|EPI_ISL_12825748|2022-02-22|Germany	MT	EPI_ISL_12825748	Germany	2022-02-22	BA.2	BA.2	BA.2	0.5	0.03	0	53	54.6392	0
hCoV-19/USA/CT-YPL22-32245/2022	MT|BA.2|EPI_ISL_12839691|2022-05-11|USA	MT	EPI_ISL_12839691	USA	2022-05-11	BA.2	BA.2	BA.2	0	0.03	0	59	60.8247	0
hCoV-19/England/LSPA-3E1C40E/2022	MT|BA.2|EPI_ISL_12851394|2022-05-16|England	MT	EPI_ISL_12851394	England	2022-05-16	BA.2	BA.2	BA.2	0.333333	0.03	0	58	59.7938	0
hCoV-19/Scotland/EDB61087/2022	MT|BA.2|EPI_ISL_12853045|2022-04-28|Scotland	MT	EPI_ISL_12853045	Scotland	2022-04-28	BA.2	BA.2	BA.2	0	0.03	0	54	55.6701	0
hCoV-19/France/ARA-CFD223002095001/2022	MT|BA.2|EPI_ISL_12862344|2022-05-10|France	MT	EPI_ISL_12862344	France	2022-05-10	BA.2	BA.2	BA.2	0	0.03	0	59	60.8247	0
hCoV-19/Switzerland/BE-SRO-500010_3709/2022	MT|BA.2|EPI_ISL_12866538|2022-04-25|Switzerland	MT	EPI_ISL_12866538	Switzerland	2022-04-25	BA.2	BA.2	BA.2	0	0.03	0	62	63.9175	0
hCoV-19/Italy/LOM_PM_87909253/2022	MT|BA.2|EPI_ISL_12866633|2022-05-13|Italy	MT	EPI_ISL_12866633	Italy	2022-05-13	BA.2	BA.2	BA.2	0	0.03	0	50	51.5464	0
hCoV-19/USA/MA-MGB-06289/2022	MT|BA.2|EPI_ISL_12881891|2022-05-12|USA	MT	EPI_ISL_12881891	USA	2022-05-12	BA.2	BA.2	BA.2	0	0.03	0	57	58.7629	0
hCoV-19/Wales/QEUH-3E0142A/2022	MT|BA.2|EPI_ISL_12893882|2022-05-03|Wales	MT	EPI_ISL_12893882	Wales	2022-05-03	BA.2	BA.2	BA.2	0	0.03	1	60	61.8557	1.03093
hCoV-19/Denmark/DCGC-518198/2022	MT|BA.2|EPI_ISL_12895490|2022-05-10|Denmark	MT	EPI_ISL_12895490	Denmark	2022-05-10	BA.2	BA.2	BA.2	0	0.03	2	61	62.8866	2.06186
hCoV-19/USA/WA-PHL-020364/2022	MT|BA.2|EPI_ISL_12912331|2022-05-12|USA	MT	EPI_ISL_12912331	USA	2022-05-12	BA.2	BA.2	BA.2	0	0.03	0	58	59.7938	0
hCoV-19/Japan/PG-229208/2022	MT|BA.2|EPI_ISL_12944682|2022-04-07|Japan	MT	EPI_ISL_12944682	Japan	2022-04-07	BA.2	BA.2	BA.2	0	0.03	0	57	58.7629	0
hCoV-19/France/GES-HMN-22052100942/2022	MT|BA.2|EPI_ISL_12960876|2022-05-02|France	MT	EPI_ISL_12960876	France	2022-05-02	BA.2	BA.2	BA.2	0	0.03	0	57	58.7629	0
hCoV-19/France/IDF-LBZCentre-EB2204250047/2022	MT|BA.2|EPI_ISL_12996825|2022-04-25|France	MT	EPI_ISL_12996825	France	2022-04-25	BA.2	BA.2	BA.2	0	0.03	0	54	55.6701	0
hCoV-19/Germany/HB-RKI-I-829116/2022	MT|BA.2|EPI_ISL_13011072|2022-05-04|Germany	MT	EPI_ISL_13011072	Germany	2022-05-04	BA.2	BA.2	BA.2	0	0.03	0	54	55.6701	0
hCoV-19/Estonia/RC0693238/2022	MT|BA.2|EPI_ISL_13029343|2022-04-21|Estonia	MT	EPI_ISL_13029343	Estonia	2022-04-21	BA.2	BA.2	BA.2	0	0.03	0	64	65.9794	0
hCoV-19/USA/WI-MHDL-2022050558/2022	MT|BA.2|EPI_ISL_13048020|2022-05-18|USA	MT	EPI_ISL_13048020	USA	2022-05-18	BA.2	BA.2	BA.2	0	0.03	1	64	65.9794	1.03093
hCoV-19/Scotland/EDB61849/2022	MT|BA.2|EPI_ISL_13048707|2022-05-12|Scotland	MT	EPI_ISL_13048707	Scotland	2022-05-12	BA.2	BA.2	BA.2	0	0.03	1	61	62.8866	1.03093
hCoV-19/England/PHEC-YYFMAOC/2022	MT|BA.2|EPI_ISL_13048829|2022-05-14|England	MT	EPI_ISL_13048829	England	2022-05-14	BA.2	BA.2	BA.2	0.333333	0.03	0	57	58.7629	0
hCoV-19/France/OCC-ChuMtp-99226438764/2022	MT|BA.2|EPI_ISL_13069781|2022-05-16|France	MT	EPI_ISL_13069781	France	2022-05-16	BA.2	BA.2	BA.2	0	0.03	1	54	55.6701	1.03093
hCoV-19/Spain/CL-COV29760/2022	MT|BA.2|EPI_ISL_13093024|2022-04-28|Spain	MT	EPI_ISL_13093024	Spain	2022-04-28	BA.2	BA.2	BA.2	0.333333	0.03	0	48	49.4845	0
hCoV-19/India/TN-CDFD-W8-390/2022	MT|BA.2|EPI_ISL_13102645|2022-05-26|India	MT	EPI_ISL_13102645	India	2022-05-26	BA.2	BA.2	BA.2	0	0.03	1	61	62.8866	1.03093
hCoV-19/Australia/QLD0x00EF7F/2022	MT|BA.2|EPI_ISL_13107144|2022-05-26|Australia	MT	EPI_ISL_13107144	Australia	2022-05-26	BA.2	BA.2	BA.2	0	0.03	0	61	62.8866	0
hCoV-19/Netherlands/GR-UMCG-MMB_5417/2022	MT|BA.2|EPI_ISL_13109254|2022-05-24|Netherlands	MT	EPI_ISL_13109254	Netherlands	2022-05-24	BA.2	BA.2	BA.2	0	0.03	1	62	63.9175	1.03093
hCoV-19/USA/MI-MDHHS-SC40963/2022	MT|BA.2|EPI_ISL_13109697|2022-05-06|USA	MT	EPI_ISL_13109697	USA	2022-05-06	BA.2	BA.2	BA.2	0.5	0.03	0	57	58.7629	0
hCoV-19/USA/TX-HMH-M-98522/2022	MT|BA.2|EPI_ISL_13114387|2022-05-26|USA	MT	EPI_ISL_13114387	USA	2022-05-26	BA.2	BA.2	BA.2	0	0.03	0	55	56.701	0
hCoV-19/Turkey/HSGM-G8994/2022	MT|BA.2|EPI_ISL_13185049|2022-04-26|Turkey	MT	EPI_ISL_13185049	Turkey	2022-04-26	BA.2	BA.2	BA.2	0	0.03	0	59	60.8247	0
hCoV-19/USA/MA-CDCBI-CRSP_2FUDXQ6MLDAADXBJ/2022	MT|BA.2|EPI_ISL_13194691|2022-05-16|USA	MT	EPI_ISL_13194691	USA	2022-05-16	BA.2	BA.2	BA.2	0	0.03	0	50	51.5464	0
hCoV-19/Australia/ACT5381/2022	MT|BA.2|EPI_ISL_13227650|2022-04-24|Australia	MT	EPI_ISL_13227650	Australia	2022-04-24	BA.2	BA.2	BA.2	0	0.03	1	59	60.8247	1.03093
hCoV-19/Australia/ACT5965/2022	MT|BA.2|EPI_ISL_13228085|2022-05-19|Australia	MT	EPI_ISL_13228085	Australia	2022-05-19	BA.2	BA.2	BA.2	0	0.03	0	60	61.8557	0
hCoV-19/Australia/WA3944/2022	MT|BA.2|EPI_ISL_13243387|2022-05-24|Australia	MT	EPI_ISL_13243387	Australia	2022-05-24	BA.2	BA.2	BA.2	0	0.03	0	58	59.7938	0
hCoV-19/Austria/LB-R00079-S017/2022	MT|BA.2|EPI_ISL_13243715|2022-05-30|Austria	MT	EPI_ISL_13243715	Austria	2022-05-30	BA.2	BA.2	BA.2	0	0.03	0	53	54.6392	0
hCoV-19/Germany/NW-RKI-I-860553/2022	MT|BA.2|EPI_ISL_13268559|2022-03-25|Germany	MT	EPI_ISL_13268559	Germany	2022-03-25	BA.2	BA.2	BA.2	0	0.03	0	51	52.5773	0
hCoV-19/Germany/NW-RKI-I-860761/2022	MT|BA.2|EPI_ISL_13268710|2022-03-21|Germany	MT	EPI_ISL_13268710	Germany	2022-03-21	BA.2	BA.2	BA.2	0	0.03	0	51	52.5773	0
hCoV-19/Ireland/D-NVRL-ecS22IRL00310042/2022	MT|BA.2|EPI_ISL_13279931|2022-04-25|Ireland	MT	EPI_ISL_13279931	Ireland	2022-04-25	BA.2	BA.2	BA.2	0	0.03	0	52	53.6082	0
hCoV-19/Ireland/TA-NVRL-ecS22IRL00310927/2022	MT|BA.2|EPI_ISL_13280458|2022-04-27|Ireland	MT	EPI_ISL_13280458	Ireland	2022-04-27	BA.2	BA.2	BA.2	0.333333	0.03	0	51	52.5773	0
hCoV-19/Germany/BY-LGL-ed77fd82-cf79-499c-bbdf-ae706395673a/2022	MT|BA.2|EPI_ISL_13280547|2022-06-03|Germany	MT	EPI_ISL_13280547	Germany	2022-06-03	BA.2	BA.2	BA.2	0	0.03	0	58	59.7938	0
hCoV-19/Belgium/CHUNamur14156702/2022	MT|BA.2|EPI_ISL_13284504|2022-05-09|Belgium	MT	EPI_ISL_13284504	Belgium	2022-05-09	BA.2	BA.2	BA.2	0.333333	0.03	0	57	58.7629	0
hCoV-19/Italy/LAZ-INMI-3321/2022	MT|BA.2|EPI_ISL_13300242|2022-05-26|Italy	MT	EPI_ISL_13300242	Italy	2022-05-26	BA.2	BA.2	BA.2	0	0.03	0	54	55.6701	0
hCoV-19/USA/NC-CDC-LC0680958/2022	MT|BA.2|EPI_ISL_13310491|2022-06-01|USA	MT	EPI_ISL_13310491	USA	2022-06-01	BA.2	BA.2	BA.2	0	0.03	1	58	59.7938	1.03093
hCoV-19/Norway/23453/2022	MT|BA.2|EPI_ISL_13328019|2022-05-24|Norway	MT	EPI_ISL_13328019	Norway	2022-05-24	BA.2	BA.2	BA.2	0	0.03	0	57	58.7629	0
hCoV-19/USA/NC-UNC-6672/2022	MT|BA.2|EPI_ISL_13343052|2022-06-06|USA	MT	EPI_ISL_13343052	USA	2022-06-06	BA.2	BA.2	BA.2	0	0.03	0	52	53.6082	0
hCoV-19/France/IDF-HMN-22062090724/2022	MT|BA.2|EPI_ISL_13349780|2022-06-06|France	MT	EPI_ISL_13349780	France	2022-06-06	BA.2	BA.2.65 (consensus call)	BA.2	0	0.03	0	60	61.8557	0
hCoV-19/Vietnam/NHTD-OUCRU3009/2022	MT|BA.2|EPI_ISL_13358765|2022-05-09|Vietnam	MT	EPI_ISL_13358765	Vietnam	2022-05-09	BA.2	BA.2	BA.2	0.5	0.03	0	63	64.9485	0
hCoV-19/Vietnam/NHTD-OUCRU3053/2022	MT|BA.2|EPI_ISL_13358809|2022-05-19|Vietnam	MT	EPI_ISL_13358809	Vietnam	2022-05-19	BA.2	BA.2	BA.2	0.5	0.03	0	62	63.9175	0
hCoV-19/Australia/QLD0x00F2B9/2022	MT|BA.2|EPI_ISL_13360044|2022-06-01|Australia	MT	EPI_ISL_13360044	Australia	2022-06-01	BA.2	BA.2	BA.2	0.5	0.03	0	61	62.8866	0
hCoV-19/Australia/QLD0x00F2BA/2022	MT|BA.2|EPI_ISL_13360049|2022-06-01|Australia	MT	EPI_ISL_13360049	Australia	2022-06-01	BA.2	BA.2	BA.2	0.5	0.03	0	61	62.8866	0
hCoV-19/France/BFC-HMN-22052250494/2022	MT|BA.2|EPI_ISL_13371113|2022-05-23|France	MT	EPI_ISL_13371113	France	2022-05-23	BA.2	BA.2	BA.2	0.5	0.03	1	51	52.5773	1.03093
hCoV-19/France/GES-HMN-22052300455/2022	MT|BA.2|EPI_ISL_13385026|2022-05-23|France	MT	EPI_ISL_13385026	France	2022-05-23	BA.2	BA.2	BA.2	0	0.03	1	58	59.7938	1.03093
hCoV-19/Belgium/AZDelta-2223-11326/2022	MT|BA.2|EPI_ISL_13393106|2022-06-17|Belgium	MT	EPI_ISL_13393106	Belgium	2022-06-17	BA.2	BA.2	BA.2	0	0.03	1	55	56.701	1.03093
hCoV-19/Estonia/RC0706355/2022	MT|BA.2|EPI_ISL_13406114|2022-05-27|Estonia	MT	EPI_ISL_13406114	Estonia	2022-05-27	BA.2	BA.2	BA.2	0.4	0.03	0	61	62.8866	0
hCoV-19/Brazil/SP-IB_158767/2022	MT|BA.2|EPI_ISL_13411059|2022-05-31|Brazil	MT	EPI_ISL_13411059	Brazil	2022-05-31	BA.2	BA.2	BA.2	0	0.03	0	58	59.7938	0
hCoV-19/France/GES-HMN-22062020321/2022	MT|BA.2|EPI_ISL_13427905|2022-05-30|France	MT	EPI_ISL_13427905	France	2022-05-30	BA.2	BA.2	BA.2	0	0.03	1	56	57.732	1.03093
hCoV-19/Israel/ICH-741230283/2022	MT|BA.2|EPI_ISL_13428186|2022-06-09|Israel	MT	EPI_ISL_13428186	Israel	2022-06-09	BA.2	BA.2	BA.2	0	0.03	1	57	58.7629	1.03093
hCoV-19/Slovakia/BA_22_00030997/2022	MT|BA.2|EPI_ISL_13445378|2022-05-20|Slovakia	MT	EPI_ISL_13445378	Slovakia	2022-05-20	BA.2	BA.2	BA.2	0	0.03	1	58	59.7938	1.03093
hCoV-19/France/PDL-HMN-22052270293/2022	MT|BA.2|EPI_ISL_13462477|2022-04-19|France	MT	EPI_ISL_13462477	France	2022-04-19	BA.2	BA.2	BA.2	0	0.03	0	59	60.8247	0
hCoV-19/Jamaica/JAM-UWIMicro-0999/2022	MT|BA.2|EPI_ISL_13462654|2022-04-22|Jamaica	MT	EPI_ISL_13462654	Jamaica	2022-04-22	BA.2	BA.2	BA.2	0	0.03	0	56	57.732	0
hCoV-19/Switzerland/VD-CHUV-GEN12127/2022	MT|BA.2|EPI_ISL_13469964|2022-06-12|Switzerland	MT	EPI_ISL_13469964	Switzerland	2022-06-12	BA.2	BA.2	BA.2	0	0.03	1	58	59.7938	1.03093
hCoV-19/England/PHEP-YYFNIXR/2022	MT|BA.2|EPI_ISL_13476237|2022-06-13|England	MT	EPI_ISL_13476237	England	2022-06-13	BA.2	BA.2	BA.2	0	0.03	0	56	57.732	0
hCoV-19/USA/NY-PRL-220615_00M02/2022	MT|BA.2|EPI_ISL_13478780|2022-06-13|USA	MT	EPI_ISL_13478780	USA	2022-06-13	BA.2	BA.2	BA.2	0	0.03	1	57	58.7629	1.03093
hCoV-19/Georgia/Tb-s5233/2022	MT|BA.2|EPI_ISL_13480545|2022-05-25|Georgia	MT	EPI_ISL_13480545	Georgia	2022-05-25	BA.2	BA.2	BA.2	0	0.03	0	60	61.8557	0
hCoV-19/USA/TX-HMH-MCoV-100514/2022	MT|BA.2|EPI_ISL_13481569|2022-06-12|USA	MT	EPI_ISL_13481569	USA	2022-06-12	BA.2	BA.2	BA.2	0	0.03	1	61	62.8866	1.03093
hCoV-19/USA/TX-HMH-MCoV-101488/2022	MT|BA.2|EPI_ISL_13483522|2022-06-16|USA	MT	EPI_ISL_13483522	USA	2022-06-16	BA.2	BA.2	BA.2	0	0.03	1	66	68.0412	1.03093
hCoV-19/Germany/NW-RKI-I-876297/2022	MT|BA.2|EPI_ISL_13568240|2022-05-16|Germany	MT	EPI_ISL_13568240	Germany	2022-05-16	BA.2	BA.2	BA.2	0	0.03	0	57	58.7629	0
hCoV-19/South Korea/KDCA81575/2022	MT|BA.2|EPI_ISL_13572143|2022-06-11|South_Korea	MT	EPI_ISL_13572143	South_Korea	2022-06-11	BA.2	BA.2	BA.2	0.333333	0.03	0	60	61.8557	0
hCoV-19/France/NAQ-ChuBo-221056739501/2022	MT|BA.2|EPI_ISL_13578717|2022-05-31|France	MT	EPI_ISL_13578717	France	2022-05-31	BA.2	BA.2	BA.2	0	0.03	3	66	68.0412	3.09278
hCoV-19/USA/NY-NYULH7389/2022	MT|BA.2|EPI_ISL_13608326|2022-06-11|USA	MT	EPI_ISL_13608326	USA	2022-06-11	BA.2	BA.2	BA.2	0	0.03	0	69	71.134	0
hCoV-19/Malaysia/C19UMB2131/2022	MT|BA.2|EPI_ISL_13622773|2022-06-05|Malaysia	MT	EPI_ISL_13622773	Malaysia	2022-06-05	BA.2	BA.2	BA.2	0	0.03	2	60	61.8557	2.06186
hCoV-19/USA/TX-HMH-MCoV-102296/2022	MT|BA.2|EPI_ISL_13625728|2022-06-21|USA	MT	EPI_ISL_13625728	USA	2022-06-21	Others	BA.2	BA.4	0.6	0.03	0	62	63.9175	0
hCoV-19/Latvia/2203077507/2022	MT|BA.2|EPI_ISL_13627897|2022-03-23|Latvia	MT	EPI_ISL_13627897	Latvia	2022-03-23	BA.2	BA.2	BA.2	0	0.03	0	60	61.8557	0
hCoV-19/Latvia/217781/2022	MT|BA.2|EPI_ISL_13630998|2022-02-07|Latvia	MT	EPI_ISL_13630998	Latvia	2022-02-07	BA.2	BA.2	BA.2	0	0.03	1	60	61.8557	1.03093
hCoV-19/Slovakia/BA_22_00032029/2022	MT|BA.2|EPI_ISL_13695381|2022-06-07|Slovakia	MT	EPI_ISL_13695381	Slovakia	2022-06-07	BA.2	BA.2	BA.2	0	0.03	1	61	62.8866	1.03093
hCoV-19/India/TG-RFCH07094_CID2432/2022	MT|BA.2|EPI_ISL_13699646|2022-02-01|India	MT	EPI_ISL_13699646	India	2022-02-01	BA.2	BA.2	BA.2	0	0.03	0	41	42.268	0
hCoV-19/Ireland/TA-NVRL-ecS22IRL00320125/2022	MT|BA.2|EPI_ISL_13775737|2022-05-06|Ireland	MT	EPI_ISL_13775737	Ireland	2022-05-06	BA.2	BA.2	BA.2	0.333333	0.03	0	52	53.6082	0
hCoV-19/Australia/QLD0x00FB3D/2022	MT|BA.2|EPI_ISL_13787385|2022-06-23|Australia	MT	EPI_ISL_13787385	Australia	2022-06-23	BA.2	BA.2	BA.2	0	0.03	1	63	64.9485	1.03093
hCoV-19/India/RJ-SMS-ICMR-INSACOG-TS-14690/2022	MT|BA.2|EPI_ISL_13848061|2022-06-20|India	MT	EPI_ISL_13848061	India	2022-06-20	BA.2	BA.2	BA.2	0	0.03	3	48	49.4845	3.09278
hCoV-19/Italy/LOM_SYNLAB_9167224818/2022	MT|BA.2|EPI_ISL_13862308|2022-04-05|Italy	MT	EPI_ISL_13862308	Italy	2022-04-05	BA.2	BA.2	BA.2	0.333333	0.03	0	56	57.732	0
hCoV-19/Slovakia/TN_22_00001723/2022	MT|BA.2|EPI_ISL_13869201|2022-06-27|Slovakia	MT	EPI_ISL_13869201	Slovakia	2022-06-27	BA.2	BA.2	BA.2	0	0.03	2	54	55.6701	2.06186
hCoV-19/Slovakia/TN_22_00001731/2022	MT|BA.2|EPI_ISL_13869207|2022-06-28|Slovakia	MT	EPI_ISL_13869207	Slovakia	2022-06-28	BA.2	BA.2	BA.2	0	0.03	1	55	56.701	1.03093
hCoV-19/Slovakia/TN_22_00001698/2022	MT|BA.2|EPI_ISL_13869213|2022-06-23|Slovakia	MT	EPI_ISL_13869213	Slovakia	2022-06-23	BA.2	BA.2	BA.2	0	0.03	1	51	52.5773	1.03093
hCoV-19/Germany/BY-RKI-I-882447/2022	MT|BA.2|EPI_ISL_13912098|2022-05-31|Germany	MT	EPI_ISL_13912098	Germany	2022-05-31	BA.2	BA.2	BA.2	0	0.03	0	47	48.4536	0
hCoV-19/Germany/SN-RKI-I-889849/2022	MT|BA.2|EPI_ISL_13921933|2022-06-15|Germany	MT	EPI_ISL_13921933	Germany	2022-06-15	Others	BA.2	BA.4	0.75	0.03	1	53	54.6392	1.03093
hCoV-19/Germany/BY-RKI-I-895124/2022	MT|BA.2|EPI_ISL_13927199|2022-06-12|Germany	MT	EPI_ISL_13927199	Germany	2022-06-12	BA.2	BA.2	BA.2	0	0.03	0	47	48.4536	0
hCoV-19/Germany/NW-RKI-I-912556/2022	MT|BA.2|EPI_ISL_13945258|2022-04-05|Germany	MT	EPI_ISL_13945258	Germany	2022-04-05	BA.2	BA.2	BA.2	0	0.03	0	52	53.6082	0
hCoV-19/Ireland/D-NVRL-ecS22IRL00324060/2022	MT|BA.2|EPI_ISL_13951642|2022-05-10|Ireland	MT	EPI_ISL_13951642	Ireland	2022-05-10	BA.2	BA.2	BA.2	0	0.03	1	49	50.5155	1.03093
hCoV-19/Ireland/D-NVRL-ecS22IRL00324074/2022	MT|BA.2|EPI_ISL_13951645|2022-05-10|Ireland	MT	EPI_ISL_13951645	Ireland	2022-05-10	BA.2	BA.2	BA.2	0	0.03	1	49	50.5155	1.03093
hCoV-19/Norway/25391/2022	MT|BA.2|EPI_ISL_13966350|2022-06-20|Norway	MT	EPI_ISL_13966350	Norway	2022-06-20	BA.2	BA.2	BA.2	0.333333	0.03	0	59	60.8247	0
hCoV-19/Brazil/SP-IB_CEVC_2200430/2022	MT|BA.2|EPI_ISL_13971989|2022-06-24|Brazil	MT	EPI_ISL_13971989	Brazil	2022-06-24	BA.2	BA.2	BA.2	0	0.03	1	58	59.7938	1.03093
hCoV-19/Brazil/SP-IB_CEVC_2200431/2022	MT|BA.2|EPI_ISL_13972035|2022-06-24|Brazil	MT	EPI_ISL_13972035	Brazil	2022-06-24	BA.2	BA.2	BA.2	0	0.03	1	59	60.8247	1.03093
hCoV-19/France/NOR-CHURouen-22745858/2022	MT|BA.2|EPI_ISL_13985790|2022-07-07|France	MT	EPI_ISL_13985790	France	2022-07-07	BA.2	BA.2	BA.2	0	0.03	2	63	64.9485	2.06186
hCoV-19/USA/TX-HMH-M-106270/2022	MT|BA.2|EPI_ISL_13993440|2022-07-11|USA	MT	EPI_ISL_13993440	USA	2022-07-11	BA.2	BA.2	BA.2	0.25	0.03	0	75	77.3196	0
hCoV-19/Belgium/UGent-4213/2022	MT|BA.2|EPI_ISL_14062638|2022-05-31|Belgium	MT	EPI_ISL_14062638	Belgium	2022-05-31	BA.2	BA.2	BA.2	0	0.03	0	60	61.8557	0
hCoV-19/India/RJ-SMS-ICMR-INSACOG-TS-14960/2022	MT|BA.2|EPI_ISL_14148662|2022-07-04|India	MT	EPI_ISL_14148662	India	2022-07-04	BA.2	BA.2	BA.2	0	0.03	3	49	50.5155	3.09278
hCoV-19/Czech Republic/CSQ8353/2022	MT|BA.2|EPI_ISL_14175028|2022-07-08|Czech_Republic	MT	EPI_ISL_14175028	Czech_Republic	2022-07-08	BA.2	BA.2	BA.2	0	0.03	1	53	54.6392	1.03093
hCoV-19/Slovakia/BA_22_00033440/2022	MT|BA.2|EPI_ISL_14199274|2022-07-08|Slovakia	MT	EPI_ISL_14199274	Slovakia	2022-07-08	BA.2	BA.2	BA.2	0	0.03	1	58	59.7938	1.03093
hCoV-19/India/AS-NEIST-INSACOG-IGIB-R35-CID1732/2022	MT|BA.2|EPI_ISL_14203520|2022-07-08|India	MT	EPI_ISL_14203520	India	2022-07-08	BA.2	BA.2	BA.2	0	0.03	2	56	57.732	2.06186
hCoV-19/Brazil/RS-LACENRS-431769390/2022	MT|BA.2|EPI_ISL_14208782|2022-07-01|Brazil	MT	EPI_ISL_14208782	Brazil	2022-07-01	BA.2	BA.2	BA.2	0	0.03	1	56	57.732	1.03093
hCoV-19/England/PHEC-YYGJCO5/2022	MT|BA.2|EPI_ISL_14212189|2022-05-27|England	MT	EPI_ISL_14212189	England	2022-05-27	BA.2	BA.2	BA.2	0	0.03	0	59	60.8247	0
hCoV-19/Sweden/2A592281523/2022	MT|BA.2|EPI_ISL_14227614|2022-07-19|Sweden	MT	EPI_ISL_14227614	Sweden	2022-07-19	BA.2	BA.2	BA.2	0	0.03	0	46	47.4227	0
hCoV-19/India/OR-ILSGS18421/2022	MT|BA.2|EPI_ISL_14228529|2022-07-21|India	MT	EPI_ISL_14228529	India	2022-07-21	Others	BA.2	BA.2.76	0.5	0.03	2	55	56.701	2.06186
hCoV-19/USA/UT-UPHL-220730177780/2022	MT|BA.2|EPI_ISL_14251807|2022-07-13|USA	MT	EPI_ISL_14251807	USA	2022-07-13	BA.2	BA.2	BA.2	0.333333	0.03	0	62	63.9175	0
hCoV-19/Finland/P-7042/2022	MT|BA.2|EPI_ISL_14304679|2022-06-22|Finland	MT	EPI_ISL_14304679	Finland	2022-06-22	BA.2	BA.2	BA.2	0	0.03	0	61	62.8866	0
hCoV-19/Germany/BY-RKI-I-918037/2022	MT|BA.2|EPI_ISL_14379435|2022-06-21|Germany	MT	EPI_ISL_14379435	Germany	2022-06-21	BA.2	BA.2	BA.2	0.166667	0.03	0	44	45.3608	0
hCoV-19/Germany/NW-RKI-I-937201/2022	MT|BA.2|EPI_ISL_14413389|2022-06-27|Germany	MT	EPI_ISL_14413389	Germany	2022-06-27	BA.2	BA.2	BA.2	0.4	0.03	0	42	43.299	0
hCoV-19/India/PB-VRDLGMCPTA-ICMR-INSACOG-GS000093/2022	MT|BA.2|EPI_ISL_14421720|2022-06-24|India	MT	EPI_ISL_14421720	India	2022-06-24	BA.2	BA.2	BA.2	0.5	0.03	0	53	54.6392	0
hCoV-19/Austria/AGES-159725/2022	MT|BA.2|EPI_ISL_14511910|2022-06-01|Austria	MT	EPI_ISL_14511910	Austria	2022-06-01	BA.2	BA.2	BA.2	0	0.03	0	58	59.7938	0
hCoV-19/Austria/AGES-167251/2022	MT|BA.2|EPI_ISL_14514744|2022-05-20|Austria	MT	EPI_ISL_14514744	Austria	2022-05-20	BA.2	BA.2	BA.2	0	0.03	1	62	63.9175	1.03093
hCoV-19/Germany/BB-RKI-I-952914/2022	MT|BA.2|EPI_ISL_14522331|2022-05-01|Germany	MT	EPI_ISL_14522331	Germany	2022-05-01	BA.2	BA.2	BA.2	0	0.03	0	58	59.7938	0
hCoV-19/Argentina/PAIS-F0705/2022	MT|BA.2|EPI_ISL_14525301|2022-07-26|Argentina	MT	EPI_ISL_14525301	Argentina	2022-07-26	BA.2	BA.2	BA.2	0.333333	0.03	1	63	64.9485	1.03093
hCoV-19/Belgium/rega-39676/2022	MT|BA.2|EPI_ISL_14668024|2022-03-13|Belgium	MT	EPI_ISL_14668024	Belgium	2022-03-13	BA.2	BA.2	BA.2	0	0.03	0	58	59.7938	0
hCoV-19/Germany/BY-RKI-I-957605/2022	MT|BA.2|EPI_ISL_14694040|2022-08-02|Germany	MT	EPI_ISL_14694040	Germany	2022-08-02	BA.2	BA.2	BA.2	0	0.03	0	48	49.4845	0
hCoV-19/Spain/IB-HUSE-06633/2022	MT|BA.2|EPI_ISL_14700285|2022-08-22|Spain	MT	EPI_ISL_14700285	Spain	2022-08-22	BA.2	BA.2	BA.2	0.333333	0.03	0	64	65.9794	0
hCoV-19/Spain/CL-33426/2022	MT|BA.2|EPI_ISL_14727457|2022-07-05|Spain	MT	EPI_ISL_14727457	Spain	2022-07-05	BA.2	BA.2	BA.2	0	0.03	3	57	58.7629	3.09278
hCoV-19/USA/FL-DHSS-B1207524/2022	MT|BA.2|EPI_ISL_14794346|2022-06-12|USA	MT	EPI_ISL_14794346	USA	2022-06-12	BA.2	BA.2	BA.2	0.2	0.03	1	65	67.0103	1.03093
hCoV-19/USA/FL-CDC-LC0872533/2022	MT|BA.2|EPI_ISL_14982716|2022-08-31|USA	MT	EPI_ISL_14982716	USA	2022-08-31	BA.2.75	BA.2	BA.2.75	0.4375	0.03	2	54	55.6701	2.06186
hCoV-19/India/KA-SLS-SEQ-42281/2022	MT|BA.2|EPI_ISL_14993188|2022-07-26|India	MT	EPI_ISL_14993188	India	2022-07-26	BA.2.75	BA.2	BA.2.75	0.5	0.03	2	61	62.8866	2.06186
hCoV-19/Colombia/DC-UNIANDES-G040518/2022	MT|BA.2|EPI_ISL_15009658|2022-06-08|Colombia	MT	EPI_ISL_15009658	Colombia	2022-06-08	BA.2	BA.2	BA.2	0	0.03	1	61	62.8866	1.03093
hCoV-19/India/GJ-INSACOG-GBRC8610/2022	MT|BA.2|EPI_ISL_15058183|2022-07-22|India	MT	EPI_ISL_15058183	India	2022-07-22	BA.2	BA.2	BA.2	0	0.03	3	52	53.6082	3.09278
hCoV-19/Spain/IB-HUSE-06826/2022	MT|BA.2|EPI_ISL_15109913|2022-09-09|Spain	MT	EPI_ISL_15109913	Spain	2022-09-09	BA.2	BA.2	BA.2	0	0.03	1	64	65.9794	1.03093
hCoV-19/India/KA-16012_S345_R1_001/2022	MT|BA.2|EPI_ISL_15203562|2022-07-05|India	MT	EPI_ISL_15203562	India	2022-07-05	BA.2	BA.2	BA.2	0.5	0.03	0	51	52.5773	0
hCoV-19/India/KA-15896_S260_R1_001/2022	MT|BA.2|EPI_ISL_15203571|2022-06-24|India	MT	EPI_ISL_15203571	India	2022-06-24	BA.2	BA.2	BA.2	0	0.03	1	51	52.5773	1.03093
hCoV-19/New Zealand/22ZA2921/2022	MT|BA.2|EPI_ISL_15277675|2022-09-12|New_Zealand	MT	EPI_ISL_15277675	New_Zealand	2022-09-12	BA.2	BA.2	BA.2	0	0.03	0	71	73.1959	0
hCoV-19/India/PY-SLS-41206_S206_R1_001/2022	MT|BA.2|EPI_ISL_15293930|2022-07-12|India	MT	EPI_ISL_15293930	India	2022-07-12	BA.2	BA.2	BA.2	0	0.03	4	63	64.9485	4.12371
hCoV-19/India/KA-18466/2022	MT|BA.2|EPI_ISL_15294853|2022-08-04|India	MT	EPI_ISL_15294853	India	2022-08-04	BA.2	BA.2	BA.2	0	0.03	3	55	56.701	3.09278
hCoV-19/India/KA-18525/2022	MT|BA.2|EPI_ISL_15294910|2022-08-18|India	MT	EPI_ISL_15294910	India	2022-08-18	BA.2	BA.2	BA.2	0	0.03	2	58	59.7938	2.06186
hCoV-19/India/RJ-SMS-ICMR-INSACOG-TS-16750/2022	MT|BA.2|EPI_ISL_15308503|2022-08-23|India	MT	EPI_ISL_15308503	India	2022-08-23	BA.2	BA.2	BA.2	0	0.03	2	56	57.732	2.06186
hCoV-19/Nepal/NPHL-S-1861/2022	MT|BA.2|EPI_ISL_15313057|2022-09-08|Nepal	MT	EPI_ISL_15313057	Nepal	2022-09-08	BA.2	BA.2	BA.2	0	0.03	2	47	48.4536	2.06186
hCoV-19/Spain/CL-COV36307/2022	MT|BA.2|EPI_ISL_15420138|2022-08-25|Spain	MT	EPI_ISL_15420138	Spain	2022-08-25	BA.2	BA.2	BA.2	0	0.03	3	58	59.7938	3.09278
hCoV-19/Spain/IB-HUSE-07004/2022	MT|BA.2|EPI_ISL_15494897|2022-10-17|Spain	MT	EPI_ISL_15494897	Spain	2022-10-17	BA.2	BA.2	BA.2	0	0.03	1	67	69.0722	1.03093
hCoV-19/France/OCC-GENBIO-J04GN2830028/2022	MT|BA.2|EPI_ISL_15528015|2022-10-10|France	MT	EPI_ISL_15528015	France	2022-10-10	BA.2	BA.2	BA.2	0	0.03	2	55	56.701	2.06186
hCoV-19/France/NAQ-GENBIO-A09GN2690017/2022	MT|BA.2|EPI_ISL_15536976|2022-09-26|France	MT	EPI_ISL_15536976	France	2022-09-26	BA.2	BA.2	BA.2	0	0.03	1	63	64.9485	1.03093
hCoV-19/India/DL-NII-1401/2022	MT|BA.2|EPI_ISL_15757272|2022-08-02|India	MT	EPI_ISL_15757272	India	2022-08-02	BA.2	BA.2	BA.2	0.5	0.03	4	40	41.2371	4.12371
hCoV-19/India/DL-NII-1449/2022	MT|BA.2|EPI_ISL_15757318|2022-09-14|India	MT	EPI_ISL_15757318	India	2022-09-14	BA.2	BA.2	BA.2	0	0.03	4	41	42.268	4.12371
hCoV-19/Qatar/QU.18.66.G7/2022	MT|BA.2|EPI_ISL_15922876|2022-10-03|Qatar	MT	EPI_ISL_15922876	Qatar	2022-10-03	BA.2	BA.2	BA.2	0	0.03	2	57	58.7629	2.06186
hCoV-19/USA/TX-HMH-MCoV-118642/2022	MT|BA.2|EPI_ISL_16012841|2022-11-27|USA	MT	EPI_ISL_16012841	USA	2022-11-27	BA.2	BA.2	BA.2	0	0.03	4	72	74.2268	4.12371
hCoV-19/Finland/VI-5326/2022	MT|BA.2|EPI_ISL_16033450|2022-04-28|Finland	MT	EPI_ISL_16033450	Finland	2022-04-28	BA.2	BA.2	BA.2	0	0.03	3	51	52.5773	3.09278
hCoV-19/Ireland/G-NVRL-ecS22IRL00464452/2022	MT|BA.2|EPI_ISL_16097629|2022-11-08|Ireland	MT	EPI_ISL_16097629	Ireland	2022-11-08	BA.2	BA.2	BA.2	0	0.03	3	48	49.4845	3.09278
hCoV-19/Ireland/KK-NVRL-ecS22IRL00464180/2022	MT|BA.2|EPI_ISL_16097727|2022-11-07|Ireland	MT	EPI_ISL_16097727	Ireland	2022-11-07	BA.2	BA.2	BA.2	0	0.03	3	51	52.5773	3.09278
hCoV-19/USA/TX-CDC-LC0950153/2022	MT|BA.2|EPI_ISL_16130518|2022-11-28|USA	MT	EPI_ISL_16130518	USA	2022-11-28	BA.2.75	BA.2	BA.2.75	0.9	0.03	2	57	58.7629	2.06186
hCoV-19/Spain/AN-CBA-24615/2022	MT|BA.2|EPI_ISL_16233033|2022-05-03|Spain	MT	EPI_ISL_16233033	Spain	2022-05-03	BA.2	BA.2	BA.2	0.5	0.03	0	59	60.8247	0
hCoV-19/Spain/CL-COV38463/2022	MT|BA.2|EPI_ISL_16245232|2022-11-12|Spain	MT	EPI_ISL_16245232	Spain	2022-11-12	BA.2	BA.2	BA.2	0	0.03	2	60	61.8557	2.06186
hCoV-19/Spain/CL-COV38940/2022	MT|BA.2|EPI_ISL_16245627|2022-11-14|Spain	MT	EPI_ISL_16245627	Spain	2022-11-14	BA.2	BA.2	BA.2	0	0.03	3	65	67.0103	3.09278
hCoV-19/Spain/CL-COV37191/2022	MT|BA.2|EPI_ISL_16247208|2022-10-07|Spain	MT	EPI_ISL_16247208	Spain	2022-10-07	BA.2	BA.2	BA.2	0	0.03	3	63	64.9485	3.09278
hCoV-19/Malaysia/HPUPM_NGS0702/2022	MT|BA.2|EPI_ISL_16368875|2022-11-03|Malaysia	MT	EPI_ISL_16368875	Malaysia	2022-11-03	BA.2.75	BA.2	BA.2.75	0.666667	0.03	4	64	65.9794	4.12371
hCoV-19/USA/DE-CDC-LC0966996/2022	MT|BA.2|EPI_ISL_16381425|2022-12-19|USA	MT	EPI_ISL_16381425	USA	2022-12-19	BA.2	BA.2	BA.2	0	0.03	3	59	60.8247	3.09278
hCoV-19/Mauritius/61183/2022	MT|BA.2|EPI_ISL_16412805|2022-12-08|Mauritius	MT	EPI_ISL_16412805	Mauritius	2022-12-08	BA.2	BA.2	BA.2	0	0.03	1	45	46.3918	1.03093
hCoV-19/South Korea/KDCA185587/2022	MT|BA.2|EPI_ISL_16413891|2022-12-21|South_Korea	MT	EPI_ISL_16413891	South_Korea	2022-12-21	BA.2	BA.2	BA.2	0	0.03	3	54	55.6701	3.09278
hCoV-19/Malaysia/HPUPM_NGS0748/2022	MT|BA.2|EPI_ISL_16449534|2022-11-07|Malaysia	MT	EPI_ISL_16449534	Malaysia	2022-11-07	BA.2	BA.2	BA.2	0.666667	0.03	3	65	67.0103	3.09278
hCoV-19/Denmark/DCGC-635193/2022	MT|BA.2|EPI_ISL_16457740|2022-12-24|Denmark	MT	EPI_ISL_16457740	Denmark	2022-12-24	BA.2	BA.2	BA.2	0	0.03	3	64	65.9794	3.09278
hCoV-19/Indonesia/JK-NIHRD-WGS-22-37519/2022	MT|BA.2|EPI_ISL_16473689|2022-12-02|Indonesia	MT	EPI_ISL_16473689	Indonesia	2022-12-02	BA.2	BA.2	BA.2	0	0.03	4	60	61.8557	4.12371
hCoV-19/USA/TX-HMH-M-122510/2023	MT|BA.2|EPI_ISL_16542938|2023-01-05|USA	MT	EPI_ISL_16542938	USA	2023-01-05	BA.2	BA.2	BA.2	0	0.03	3	66	68.0412	3.09278
hCoV-19/Austria/AGES-1165975/2022	MT|BA.2|EPI_ISL_16550725|2022-12-19|Austria	MT	EPI_ISL_16550725	Austria	2022-12-19	BA.2	BA.2	BA.2	0	0.03	1	57	58.7629	1.03093
hCoV-19/Austria/AGES-1165976/2022	MT|BA.2|EPI_ISL_16550726|2022-12-19|Austria	MT	EPI_ISL_16550726	Austria	2022-12-19	BA.2	BA.2	BA.2	0	0.03	2	57	58.7629	2.06186
hCoV-19/USA/TX-HMH-123196/2023	MT|BA.2|EPI_ISL_16599325|2023-01-11|USA	MT	EPI_ISL_16599325	USA	2023-01-11	BA.2	BA.2	BA.2	0	0.03	3	62	63.9175	3.09278
hCoV-19/USA/TX-HMH-122865/2023	MT|BA.2|EPI_ISL_16599747|2023-01-06|USA	MT	EPI_ISL_16599747	USA	2023-01-06	BA.2	BA.2	BA.2	0.25	0.03	3	67	69.0722	3.09278
hCoV-19/Georgia/Tb-s6202/2022	MT|BA.2|EPI_ISL_16601380|2022-06-02|Georgia	MT	EPI_ISL_16601380	Georgia	2022-06-02	BA.2	BA.2	BA.2	0	0.03	0	58	59.7938	0
hCoV-19/Thailand/NIC_BKN_27613/2022	MT|BA.2|EPI_ISL_16638912|2022-12-20|Thailand	MT	EPI_ISL_16638912	Thailand	2022-12-20	BA.2	BA.2	BA.2	0	0.03	2	55	56.701	2.06186
hCoV-19/Thailand/NIC_BKN_27620/2022	MT|BA.2|EPI_ISL_16638914|2022-12-20|Thailand	MT	EPI_ISL_16638914	Thailand	2022-12-20	BA.2	BA.2	BA.2	0	0.03	2	58	59.7938	2.06186
hCoV-19/Italy/CAM-TIGEM-IZSM-COLLI-44211/2023	MT|BA.2|EPI_ISL_16740232|2023-01-16|Italy	MT	EPI_ISL_16740232	Italy	2023-01-16	BA.2	BA.2	BA.2	0	0.03	1	66	68.0412	1.03093
hCoV-19/USA/TX-HMH-M-124262/2023	MT|BA.2|EPI_ISL_16762249|2023-01-25|USA	MT	EPI_ISL_16762249	USA	2023-01-25	BA.2	BA.2	BA.2	0.666667	0.03	1	74	76.2887	1.03093
hCoV-19/Germany/BY-RKI-I-1100165/2023	MT|BA.2|EPI_ISL_16882928|2023-01-28|Germany	MT	EPI_ISL_16882928	Germany	2023-01-28	BA.2	BA.2	BA.2	0	0.03	3	58	59.7938	3.09278
hCoV-19/Germany/BW-RKI-I-1103592/2023	MT|BA.2|EPI_ISL_16886072|2023-01-28|Germany	MT	EPI_ISL_16886072	Germany	2023-01-28	BA.2	BA.2	BA.2	0	0.03	3	60	61.8557	3.09278
hCoV-19/Germany/NW-RKI-I-1104042/2023	MT|BA.2|EPI_ISL_16886318|2023-01-23|Germany	MT	EPI_ISL_16886318	Germany	2023-01-23	BA.2	BA.2	BA.2	0	0.03	1	55	56.701	1.03093
hCoV-19/USA/TX-HMH-M-124764/2023	MT|BA.2|EPI_ISL_16919422|2023-02-02|USA	MT	EPI_ISL_16919422	USA	2023-02-02	BA.2	BA.2	BA.2	0.333333	0.03	2	62	63.9175	2.06186
hCoV-19/USA/TX-HMH-M-124812/2023	MT|BA.2|EPI_ISL_16919448|2023-01-27|USA	MT	EPI_ISL_16919448	USA	2023-01-27	Others	BA.2	BA.4	0.2	0.03	2	58	59.7938	2.06186
hCoV-19/USA/TX-HMH-M-125053/2023	MT|BA.2|EPI_ISL_16919578|2023-01-18|USA	MT	EPI_ISL_16919578	USA	2023-01-18	BA.2	BA.2	BA.2	0	0.03	3	61	62.8866	3.09278
hCoV-19/Germany/BW-RKI-I-1104732/2023	MT|BA.2|EPI_ISL_16940158|2023-02-03|Germany	MT	EPI_ISL_16940158	Germany	2023-02-03	BA.2	BA.2	BA.2	0	0.03	4	63	64.9485	4.12371
hCoV-19/Germany/BW-RKI-I-1107704/2023	MT|BA.2|EPI_ISL_17003777|2023-02-09|Germany	MT	EPI_ISL_17003777	Germany	2023-02-09	BA.2	BA.2	BA.2	0	0.03	3	60	61.8557	3.09278
hCoV-19/Germany/BW-RKI-I-1108953/2023	MT|BA.2|EPI_ISL_17004926|2023-02-15|Germany	MT	EPI_ISL_17004926	Germany	2023-02-15	BA.2	BA.2	BA.2	0	0.03	3	59	60.8247	3.09278
hCoV-19/Germany/BW-RKI-I-1109125/2023	MT|BA.2|EPI_ISL_17005077|2023-02-10|Germany	MT	EPI_ISL_17005077	Germany	2023-02-10	BA.2	BA.2	BA.2	0	0.03	3	58	59.7938	3.09278
hCoV-19/USA/TX-HMH-M-125549/2023	MT|BA.2|EPI_ISL_17035056|2023-02-09|USA	MT	EPI_ISL_17035056	USA	2023-02-09	BA.2	BA.2	BA.2	0	0.03	2	63	64.9485	2.06186
hCoV-19/France/IDF-APHPSU_PSL-662302058757/2023	MT|BA.2|EPI_ISL_17036225|2023-02-20|France	MT	EPI_ISL_17036225	France	2023-02-20	BA.2	BA.2	BA.2	0.5	0.03	0	61	62.8866	0
hCoV-19/Poland/WSSEL-215/2023	MT|BA.2|EPI_ISL_17080896|2023-02-16|Poland	MT	EPI_ISL_17080896	Poland	2023-02-16	BA.2	BA.2	BA.2	0	0.03	6	72	74.2268	6.18557
hCoV-19/South Korea/KDCA214260/2023	MT|BA.2|EPI_ISL_17090268|2023-02-02|South_Korea	MT	EPI_ISL_17090268	South_Korea	2023-02-02	BA.2	BA.2	BA.2	0	0.03	3	83	85.567	3.09278
hCoV-19/South Korea/KDCA218259/2023	MT|BA.2|EPI_ISL_17164579|2023-02-17|South_Korea	MT	EPI_ISL_17164579	South_Korea	2023-02-17	BA.2	BA.2	BA.2	0	0.03	2	49	50.5155	2.06186
hCoV-19/South Korea/KDCA218821/2023	MT|BA.2|EPI_ISL_17172440|2023-02-22|South_Korea	MT	EPI_ISL_17172440	South_Korea	2023-02-22	BA.2	BA.2	BA.2	0	0.03	2	57	58.7629	2.06186
hCoV-19/Spain/AN-PMC-32122/2022	MT|BA.2|EPI_ISL_17214826|2022-12-21|Spain	MT	EPI_ISL_17214826	Spain	2022-12-21	BA.2	BA.2	BA.2	0.5	0.03	1	66	68.0412	1.03093
hCoV-19/Portugal/PT46680/2023	BG|BA.2.75|EPI_ISL_17242733|2023-03-07|Portugal	BG	EPI_ISL_17242733	Portugal	2023-03-07	BA.2.75	BA.2.75	BA.2.75	0.5	0.03	4	88	90.7216	4.12371
hCoV-19/Germany/BW-RKI-I-1121707/2023	MT|BA.2|EPI_ISL_17255840|2023-02-28|Germany	MT	EPI_ISL_17255840	Germany	2023-02-28	BA.2	BA.2	BA.2	0	0.03	4	64	65.9794	4.12371
hCoV-19/Germany/BY-RKI-I-1122135/2023	BG|CH.1.1|EPI_ISL_17256244|2023-03-06|Germany	BG	EPI_ISL_17256244	Germany	2023-03-06	Others	CH.1.1	CH.1.1	0.666667	0.03	3	55	56.701	3.09278
hCoV-19/Poland/Kce-367/2023	BG|BA.2.75|EPI_ISL_17266711|2023-03-06|Poland	BG	EPI_ISL_17266711	Poland	2023-03-06	BA.2.75	BA.2.75	BA.2.75	0	0.03	3	68	70.1031	3.09278
hCoV-19/USA/NY-UB-ECMC-00639/2022	MT|BA.2|EPI_ISL_17271618|2022-11-16|USA	MT	EPI_ISL_17271618	USA	2022-11-16	BA.2	BA.2	BA.2	0	0.03	1	50	51.5464	1.03093
hCoV-19/Italy/UMB-LAOP-112-2-02/2023	BG|BA.2.75|EPI_ISL_17285430|2023-03-18|Italy	BG	EPI_ISL_17285430	Italy	2023-03-18	BA.2.75	BA.2.75	BA.2.75	0	0.03	3	76	78.3505	3.09278
hCoV-19/Belgium/UMONS-N838068501/2023	MT|BA.2|EPI_ISL_17286156|2023-03-03|Belgium	MT	EPI_ISL_17286156	Belgium	2023-03-03	BA.2	BA.2	BA.2	0	0.03	2	60	61.8557	2.06186
hCoV-19/India/WB-1931503384377/2022	MT|BA.2|EPI_ISL_17349770|2022-11-28|India	MT	EPI_ISL_17349770	India	2022-11-28	BA.2	BA.2	BA.2	0	0.03	4	79	81.4433	4.12371
hCoV-19/India/TN-SPHL-2847/2023	BG|BA.2|EPI_ISL_17372416|2023-03-06|India	BG	EPI_ISL_17372416	India	2023-03-06	BA.2	BA.2	BA.2	0	0.03	1	44	45.3608	1.03093
hCoV-19/South Korea/KDCA225654/2023	BG|BA.2.75|EPI_ISL_17415098|2023-03-17|South_Korea	BG	EPI_ISL_17415098	South_Korea	2023-03-17	BA.2.75	BA.2.75	BA.2.75	0	0.03	4	68	70.1031	4.12371
hCoV-19/Spain/AN-PMC-34464/2023	MT|BA.2|EPI_ISL_17503828|2023-04-11|Spain	MT	EPI_ISL_17503828	Spain	2023-04-11	BA.2	BA.2	BA.2	0	0.03	5	61	62.8866	5.15464
hCoV-19/France/PAC-HCL723000421301/2023	MT|BA.2|EPI_ISL_17524503|2023-03-20|France	MT	EPI_ISL_17524503	France	2023-03-20	BA.2	BA.2	BA.2	0	0.03	1	80	82.4742	1.03093
hCoV-19/USA/TN-VUMC-SD-MVU001_3552/2022	MT|BA.2|EPI_ISL_17536729|2022-05-14|USA	MT	EPI_ISL_17536729	USA	2022-05-14	BA.2	BA.2	BA.2	0	0.03	0	57	58.7629	0
hCoV-19/Belgium/ZNA_26223998/2023	MT|BA.2|EPI_ISL_17582830|2023-03-19|Belgium	MT	EPI_ISL_17582830	Belgium	2023-03-19	BA.2	BA.2	BA.2	0	0.03	3	56	57.732	3.09278
hCoV-19/Ukraine/78216/2023	BG|BA.2|EPI_ISL_17583263|2023-04-11|Ukraine	BG	EPI_ISL_17583263	Ukraine	2023-04-11	BA.2	BA.2	BA.2	0	0.03	5	65	67.0103	5.15464
hCoV-19/Germany/BY-RKI-I-1134593/2023	BG|BA.5.2|EPI_ISL_17613011|2023-04-06|Germany	BG	EPI_ISL_17613011	Germany	2023-04-06	Others	BA.5.2	BA.5.2	0	0.03	1	47	48.4536	1.03093
hCoV-19/Malaysia/C19UMB3969/2023	BG|BA.2|EPI_ISL_17655018|2023-03-31|Malaysia	BG	EPI_ISL_17655018	Malaysia	2023-03-31	BA.2	BA.2	BA.2	0	0.03	1	78	80.4124	1.03093
hCoV-19/India/RJ-SMS-ICMR-INSACOG-US-41/2023	MT|BA.2|EPI_ISL_17661876|2023-02-04|India	MT	EPI_ISL_17661876	India	2023-02-04	BA.2	BA.2	BA.2	0	0.03	3	59	60.8247	3.09278
hCoV-19/Jamaica/JAM-UWIMicro-2645/2022	MT|BA.2|EPI_ISL_17681074|2022-06-10|Jamaica	MT	EPI_ISL_17681074	Jamaica	2022-06-10	BA.2	BA.2	BA.2	0	0.03	0	58	59.7938	0
hCoV-19/France/un-IHU-074701/2022	MT|BA.2|EPI_ISL_17752336|2022-03|France	MT	EPI_ISL_17752336	France	2022-03	BA.2	BA.2	BA.2	0	0.03	0	55	56.701	0
hCoV-19/Italy/SIC-CQRC-4729572/2023	BG|BA.2|EPI_ISL_17792172|2023-03-28|Italy	BG	EPI_ISL_17792172	Italy	2023-03-28	BA.2	BA.2	BA.2	0	0.03	0	77	79.3814	0
hCoV-19/Brazil/RS-LGBM-HMV-01-0279-P/2023	MT|BA.2|EPI_ISL_17848810|2023-02-02|Brazil	MT	EPI_ISL_17848810	Brazil	2023-02-02	BA.2	BA.2	BA.2	0	0.03	2	59	60.8247	2.06186
hCoV-19/Colombia/ANT-LDSP4747/2023	BG|XBB.1.5.77|EPI_ISL_17960517|2023-07-05|Colombia	BG	EPI_ISL_17960517	Colombia	2023-07-05	BA.2	XBB.1.5.77	XBB.1.5.77	0	0.03	5	74	76.2887	5.15464
hCoV-19/Colombia/ANT-LDSP4746/2023	BG|XBB.1.5.77|EPI_ISL_17960524|2023-07-05|Colombia	BG	EPI_ISL_17960524	Colombia	2023-07-05	XBB.1.5	XBB.1.5.77	XBB.1.5.77	0	0.03	5	74	76.2887	5.15464
hCoV-19/USA/NY-NYULH-15329/2023	BG|XBB.1.5.73|EPI_ISL_17971959|2023-07-01|USA	BG	EPI_ISL_17971959	USA	2023-07-01	BA.2	XBB.1.5.73	XBB.1.5.73	0.5	0.03	3	67	69.0722	3.09278
hCoV-19/Israel/ICH-741198175/2023	BG|XBB.1.5.77|EPI_ISL_17973385|2023-07-01|Israel	BG	EPI_ISL_17973385	Israel	2023-07-01	XBB.1.5	XBB.1.5.77	XBB.1.5.77	0	0.03	3	68	70.1031	3.09278
hCoV-19/Canada/ON-PHL-23-26576/2023	BG|XBB.1.5|EPI_ISL_17977839|2023-07-04|Canada	BG	EPI_ISL_17977839	Canada	2023-07-04	XBB.1.5	XBB.1.5	XBB.1.5	0.5	0.03	5	73	75.2577	5.15464
hCoV-19/Canada/ON-PHL-23-26596/2023	BG|XBB.1.5.73|EPI_ISL_17977846|2023-07-04|Canada	BG	EPI_ISL_17977846	Canada	2023-07-04	XBB.1.5	XBB.1.5.73	XBB.1.5.73	0	0.03	5	73	75.2577	5.15464
hCoV-19/Canada/ON-PHL-23-26599/2023	BG|XBB.1.5.73|EPI_ISL_17977849|2023-07-04|Canada	BG	EPI_ISL_17977849	Canada	2023-07-04	XBB.1.5	XBB.1.5.73	XBB.1.5.73	0	0.03	5	73	75.2577	5.15464
hCoV-19/Canada/ON-PHL-23-26577/2023	BG|XBB.1.5|EPI_ISL_17977867|2023-07-04|Canada	BG	EPI_ISL_17977867	Canada	2023-07-04	XBB.1.5	XBB.1.5	XBB.1.5	0.875	0.03	5	75	77.3196	5.15464
hCoV-19/Canada/ON-KHS-04780-v1/2023	BG|XBB.1.5|EPI_ISL_17977995|2023-07-01|Canada	BG	EPI_ISL_17977995	Canada	2023-07-01	XBB.1.5	XBB.1.5	XBB.1.5	0.75	0.03	5	80	82.4742	5.15464
hCoV-19/Spain/PV-HUD-70022816/2023	BG|XBB.1.5|EPI_ISL_17985221|2023-07-06|Spain	BG	EPI_ISL_17985221	Spain	2023-07-06	XBB.1.5	XBB.1.5	XBB.1.5	0.666667	0.03	5	73	75.2577	5.15464
hCoV-19/USA/NJ-GBW-H10-015-4772/2023	BG|XBB.1.5.77|EPI_ISL_17985463|2023-07-03|USA	BG	EPI_ISL_17985463	USA	2023-07-03	XBB.1.5	XBB.1.5.77	XBB.1.5.77	0	0.03	5	74	76.2887	5.15464
hCoV-19/Ireland/G-LUH-N1389/2023	BG|XBB.1.5.105|EPI_ISL_17986420|2023-07-04|Ireland	BG	EPI_ISL_17986420	Ireland	2023-07-04	XBB.1.5	XBB.1.5.105	XBB.1.5.105	0	0.03	5	75	77.3196	5.15464
hCoV-19/Italy/EMR_AUSLRomagna_C034-21/2023	BG|GK.2.1|EPI_ISL_17990202|2023-07-10|Italy	BG	EPI_ISL_17990202	Italy	2023-07-10	Others	GK.2.1	GK.2.1	0	0.03	3	69	71.134	3.09278
hCoV-19/Canada/ON-PHL-23-26635/2023	BG|XBB.1.5|EPI_ISL_17993983|2023-07-06|Canada	BG	EPI_ISL_17993983	Canada	2023-07-06	XBB.1.5	XBB.1.5	XBB.1.5	0.5	0.03	5	73	75.2577	5.15464
hCoV-19/Canada/ON-PHL-23-26690/2023	BG|XBB.1.5.73|EPI_ISL_17994035|2023-07-05|Canada	BG	EPI_ISL_17994035	Canada	2023-07-05	XBB.1.5	XBB.1.5.73	XBB.1.5.73	0	0.03	5	73	75.2577	5.15464
hCoV-19/Canada/ON-PHL-23-26700/2023	BG|XBB.1.5.73|EPI_ISL_17994045|2023-07-06|Canada	BG	EPI_ISL_17994045	Canada	2023-07-06	XBB.1.5	XBB.1.5.73	XBB.1.5.73	0	0.03	5	73	75.2577	5.15464
hCoV-19/Canada/ON-PHL-23-26711/2023	BG|XBB.1.5.72|EPI_ISL_17994056|2023-07-06|Canada	BG	EPI_ISL_17994056	Canada	2023-07-06	XBB.1.5	XBB.1.5.72	XBB.1.5.72	0	0.03	5	75	77.3196	5.15464
hCoV-19/Canada/ON-PHL-23-26739/2023	BG|XBB.1.5.73|EPI_ISL_17994081|2023-07-10|Canada	BG	EPI_ISL_17994081	Canada	2023-07-10	XBB.1.5	XBB.1.5.73	XBB.1.5.73	0	0.03	5	73	75.2577	5.15464
hCoV-19/USA/WA-CDC-UW23070326940/2023	BG|XBB.1|EPI_ISL_17994130|2023-07-03|USA	BG	EPI_ISL_17994130	USA	2023-07-03	XBB.1.5	XBB.1	XBB.1	0.5	0.03	4	77	79.3814	4.12371
hCoV-19/Denmark/DCGC-647505/2023	BG|XBB.1.5|EPI_ISL_17995491|2023-07-03|Denmark	BG	EPI_ISL_17995491	Denmark	2023-07-03	XBB.1.5	XBB.1.5	XBB.1.5	0	0.03	5	72	74.2268	5.15464
hCoV-19/USA/NY-GBW-H10-015-6103/2023	BG|XBB.1.5|EPI_ISL_17996087|2023-07-07|USA	BG	EPI_ISL_17996087	USA	2023-07-07	XBB.1.5	XBB.1.5	XBB.1.5	0.666667	0.03	5	72	74.2268	5.15464
hCoV-19/USA/VA-GBW-H10-015-8049/2023	BG|XBB.1.5.102|EPI_ISL_17996090|2023-07-08|USA	BG	EPI_ISL_17996090	USA	2023-07-08	XBB.1.5	XBB.1.5.102	XBB.1.5.102	0	0.03	6	74	76.2887	6.18557
hCoV-19/Spain/PV-HUD-96091409/2023	BG|XBB.1.5.104|EPI_ISL_18008616|2023-07-13|Spain	BG	EPI_ISL_18008616	Spain	2023-07-13	XBB.1.5	XBB.1.5.104	XBB.1.5.104	0	0.03	5	72	74.2268	5.15464
hCoV-19/USA/OR-OSPHL-08694/2023	BG|XBB.1.5.77|EPI_ISL_18008694|2023-07-06|USA	BG	EPI_ISL_18008694	USA	2023-07-06	XBB.1.5	XBB.1.5.77	XBB.1.5.77	0	0.03	5	77	79.3814	5.15464
hCoV-19/France/PAC-HCL023110276101/2023	BG|XBB.1.5|EPI_ISL_18010083|2023-07-03|France	BG	EPI_ISL_18010083	France	2023-07-03	XBB.1.5	XBB.1.5	XBB.1.5	0	0.03	5	72	74.2268	5.15464
hCoV-19/France/OCC-HCL723000883701/2023	BG|XBB.1.5|EPI_ISL_18010132|2023-07-03|France	BG	EPI_ISL_18010132	France	2023-07-03	XBB.1.5	XBB.1.5	XBB.1.5	0	0.03	5	74	76.2887	5.15464
hCoV-19/Spain/MD-HGUGM-7597303/2023	BG|XBB.1.5|EPI_ISL_18010387|2023-07-03|Spain	BG	EPI_ISL_18010387	Spain	2023-07-03	XBB.1.5	XBB.1.5	XBB.1.5.108	0	0.03	5	79	81.4433	5.15464
hCoV-19/Spain/MD-HGUGM-7519692/2023	BG|XBB.1.5.72|EPI_ISL_18010389|2023-07-10|Spain	BG	EPI_ISL_18010389	Spain	2023-07-10	XBB.1.5	XBB.1.5.72	XBB.1.5.72	0	0.03	5	75	77.3196	5.15464
hCoV-19/Spain/MD-HGUGM-7519745/2023	BG|GN.3|EPI_ISL_18010397|2023-07-12|Spain	BG	EPI_ISL_18010397	Spain	2023-07-12	XBB.1.5	GN.3	GN.3	0	0.03	5	74	76.2887	5.15464
hCoV-19/Italy/SIC_ASPRG_01252720/2023	BG|XBB.1.5|EPI_ISL_18012392|2023-07-12|Italy	BG	EPI_ISL_18012392	Italy	2023-07-12	XBB.1.5	XBB.1.5	XBB.1.5	0	0.03	4	69	71.134	4.12371
hCoV-19/Israel/ICH_741198259/2023	BG|XBB.1.5.77|EPI_ISL_18012527|2023-07-11|Israel	BG	EPI_ISL_18012527	Israel	2023-07-11	XBB.1.5	XBB.1.5.77	XBB.1.5.77	0	0.03	3	68	70.1031	3.09278
hCoV-19/Italy/EMR_BO_2811/2023	BG|XBB.1.33|EPI_ISL_18015535|2023-07-17|Italy	BG	EPI_ISL_18015535	Italy	2023-07-17	XBB.1.5	XBB.1.33	XBB.1.33	0	0.03	3	72	74.2268	3.09278
hCoV-19/England/CLIMB-CM7YRJGB/2023	BG|XBB.1.5|EPI_ISL_18015573|2023-07-03|United_Kingdom	BG	EPI_ISL_18015573	United_Kingdom	2023-07-03	XBB.1.5	XBB.1.5	XBB.1.5	0.333333	0.03	5	72	74.2268	5.15464
hCoV-19/England/NEWC-325621FC/2022	MT|BA.2|EPI_ISL_18018401|2022-03-21|England	MT	EPI_ISL_18018401	England	2022-03-21	Others	BA.2	BA.2	0	0.03	1	59	60.8247	1.03093
hCoV-19/Scotland/QEUH-2E9FBD93/2022	MT|BA.2|EPI_ISL_18021272|2022-03-28|Scotland	MT	EPI_ISL_18021272	Scotland	2022-03-28	XBB.1.5	BA.2	BA.2	0	0.03	0	57	58.7629	0
hCoV-19/England/QEUH-32576492/2022	MT|BA.2|EPI_ISL_18028785|2022-09-15|England	MT	EPI_ISL_18028785	England	2022-09-15	XBB.1.5	BA.2	BA.2	0	0.03	2	101	104.124	2.06186
hCoV-19/Canada/ON-PHL-23-26748-v2/2023	BG|XBB.1.5.72|EPI_ISL_18030436|2023-07-10|Canada	BG	EPI_ISL_18030436	Canada	2023-07-10	XBB.1.5	XBB.1.5.72	XBB.1.5.72	0	0.03	5	76	78.3505	5.15464
hCoV-19/Canada/ON-PHL-23-26763-v2/2023	BG|XBB.1.5.92|EPI_ISL_18030445|2023-07-10|Canada	BG	EPI_ISL_18030445	Canada	2023-07-10	XBB.1.5	XBB.1.5.92	XBB.1.5.92	0	0.03	5	74	76.2887	5.15464
hCoV-19/Canada/ON-PHL-23-26854/2023	BG|XBB.1.5.73|EPI_ISL_18030482|2023-07-15|Canada	BG	EPI_ISL_18030482	Canada	2023-07-15	XBB.1.5	XBB.1.5.73	XBB.1.5.73	0	0.03	5	73	75.2577	5.15464
hCoV-19/Canada/ON-PHL-23-26994/2023	BG|XBB.1.5.73|EPI_ISL_18030581|2023-07-18|Canada	BG	EPI_ISL_18030581	Canada	2023-07-18	XBB.1.5	XBB.1.5.73	XBB.1.5.73	0	0.03	5	73	75.2577	5.15464
hCoV-19/Canada/ON-PHL-23-27002/2023	BG|XBB.1.5.77|EPI_ISL_18030589|2023-07-18|Canada	BG	EPI_ISL_18030589	Canada	2023-07-18	XBB.1.5	XBB.1.5.77	XBB.1.5.77	0	0.03	5	75	77.3196	5.15464
hCoV-19/Canada/ON-PHL-23-27003/2023	BG|XBB.1.5.72|EPI_ISL_18030590|2023-07-17|Canada	BG	EPI_ISL_18030590	Canada	2023-07-17	XBB.1.5	XBB.1.5.72	XBB.1.5.72	0	0.03	5	77	79.3814	5.15464
hCoV-19/USA/NV-SNPHL-770389/2023	BG|XBB.1.5|EPI_ISL_18030616|2023-07-05|USA	BG	EPI_ISL_18030616	USA	2023-07-05	XBB.1.5	XBB.1.5	XBB.1.5	0	0.03	5	74	76.2887	5.15464
hCoV-19/USA/NV-SNPHL-770922/2023	BG|XBB.1.5|EPI_ISL_18030637|2023-07-11|USA	BG	EPI_ISL_18030637	USA	2023-07-11	XBB.1.5	XBB.1.5	XBB.1.5	0.5	0.03	4	68	70.1031	4.12371
hCoV-19/Italy/VEN-IZSVe-23RS8175-2_TV/2023	BG|XBB.1.5|EPI_ISL_18032342|2023-07-13|Italy	BG	EPI_ISL_18032342	Italy	2023-07-13	XBB	XBB.1.5	XBB.1.5	0	0.03	6	78	80.4124	6.18557
hCoV-19/Japan/PG-547802/2023	BG|XBB.1.5.90|EPI_ISL_18033115|2023-07-03|Japan	BG	EPI_ISL_18033115	Japan	2023-07-03	XBB.1.5	XBB.1.5.90	XBB.1.5.90	0	0.03	6	75	77.3196	6.18557
hCoV-19/Switzerland/ZH-UZH-IMV-4782191c/2023	BG|XBB.1.5|EPI_ISL_18034103|2023-07-11|Switzerland	BG	EPI_ISL_18034103	Switzerland	2023-07-11	XBB.1.5	XBB.1.5	XBB.1.5	0	0.03	4	74	76.2887	4.12371
hCoV-19/Guangdong/GDCDC_SZHG_2256/2023	BG|XBB.1.5|EPI_ISL_18036760|2023-07-01|China	BG	EPI_ISL_18036760	China	2023-07-01	BA.2	XBB.1.5	XBB.1.5	0	0.03	5	77	79.3814	5.15464
hCoV-19/USA/VA-GBW-H20-331-1947/2023	BG|XBB.1.5.106|EPI_ISL_18036916|2023-07-15|USA	BG	EPI_ISL_18036916	USA	2023-07-15	XBB.1.5	XBB.1.5.106	XBB.1.5.106	0	0.03	5	77	79.3814	5.15464
hCoV-19/Dominican Republic/2155489-LNSPDD/2023	BG|XBB.1.5|EPI_ISL_18038425|2023-07-14|Dominican_Republic	BG	EPI_ISL_18038425	Dominican_Republic	2023-07-14	XBB.1.5	XBB.1.5	XBB.1.5	0.666667	0.03	5	75	77.3196	5.15464
hCoV-19/USA/HI-H2323131/2023	BG|XBB.1.5.75|EPI_ISL_18038672|2023-07-06|USA	BG	EPI_ISL_18038672	USA	2023-07-06	XBB.1.5	XBB.1.5.75	XBB.1.5.75	0	0.03	5	70	72.1649	5.15464
hCoV-19/South Korea/KDCA-251968/2023	BG|XBB.1.5|EPI_ISL_18039102|2023-07-03|South_Korea	BG	EPI_ISL_18039102	South_Korea	2023-07-03	XBB	XBB.1.5	XBB.1.5	0.5	0.03	5	64	65.9794	5.15464
hCoV-19/South Korea/KDCA-251991/2023	BG|XBB.1.5|EPI_ISL_18039122|2023-07-04|South_Korea	BG	EPI_ISL_18039122	South_Korea	2023-07-04	XBB.1.5	XBB.1.5	XBB.1.5	0	0.03	5	73	75.2577	5.15464
hCoV-19/Thailand/NIC_KSN_7340/2023	BG|XBB.1.5|EPI_ISL_18042058|2023-07-11|Thailand	BG	EPI_ISL_18042058	Thailand	2023-07-11	XBB.1.5	XBB.1.5	XBB.1.5	0.5	0.03	5	75	77.3196	5.15464
hCoV-19/Spain/CL-42768/2023	BG|GK.1|EPI_ISL_18042285|2023-07-08|Spain	BG	EPI_ISL_18042285	Spain	2023-07-08	XBB.1.5	GK.1	GK.1	0	0.03	3	65	67.0103	3.09278
hCoV-19/Puerto Rico/PR-CVL-018664/2023	BG|XBB.1.5.77|EPI_ISL_18043029|2023-07-05|Puerto_Rico	BG	EPI_ISL_18043029	Puerto_Rico	2023-07-05	XBB.1.5	XBB.1.5.77	XBB.1.5.77	0	0.03	5	73	75.2577	5.15464
hCoV-19/Panama/M271486-GMI/2023	BG|XBB.1.5|EPI_ISL_18043475|2023-07-07|Panama	BG	EPI_ISL_18043475	Panama	2023-07-07	XBB.1.5	XBB.1.5	XBB.1.5	0	0.03	5	70	72.1649	5.15464
hCoV-19/Panama/M271491-GMI/2023	BG|XBB.1.5|EPI_ISL_18043477|2023-07-07|Panama	BG	EPI_ISL_18043477	Panama	2023-07-07	XBB.1.5	XBB.1.5	XBB.1.5	0	0.03	5	72	74.2268	5.15464
hCoV-19/USA/OR-OSPHL-08717/2023	BG|XBB.1.5|EPI_ISL_18043555|2023-07-14|USA	BG	EPI_ISL_18043555	USA	2023-07-14	XBB.1.5	XBB.1.5	XBB.1.5	0	0.03	5	76	78.3505	5.15464
hCoV-19/England/CLIMB-CM7YEWAU/2023	BG|XBB.1.5|EPI_ISL_18044409|2023-07-11|United_Kingdom	BG	EPI_ISL_18044409	United_Kingdom	2023-07-11	XBB.1.5	XBB.1.5	XBB.1.5	0	0.03	5	77	79.3814	5.15464
hCoV-19/USA/MS-MSPHL-0242/2023	BG|XBB.1.5|EPI_ISL_18044670|2023-07-13|USA	BG	EPI_ISL_18044670	USA	2023-07-13	XBB.1.5	XBB.1.5	XBB.1.5	0	0.03	5	68	70.1031	5.15464
hCoV-19/USA/AZ-ASPHL-1926/2023	BG|XBB.1.5|EPI_ISL_18046467|2023-07-13|USA	BG	EPI_ISL_18046467	USA	2023-07-13	XBB.1.5	XBB.1.5	XBB.1.5.110	0	0.03	5	75	77.3196	5.15464
hCoV-19/South Korea/KDCA252589/2023	BG|XBB.1.5|EPI_ISL_18046946|2023-07-04|South_Korea	BG	EPI_ISL_18046946	South_Korea	2023-07-04	XBB.1.5	XBB.1.5	XBB.1.5	0	0.03	5	76	78.3505	5.15464
hCoV-19/South Korea/KDCA252964/2023	BG|XBB.1.5|EPI_ISL_18047251|2023-07-06|South_Korea	BG	EPI_ISL_18047251	South_Korea	2023-07-06	XBB.1.5	XBB.1.5	XBB.1.5	0	0.03	3	65	67.0103	3.09278
hCoV-19/South Korea/KDCA252975/2023	BG|XBB.1.5.38|EPI_ISL_18047256|2023-07-06|South_Korea	BG	EPI_ISL_18047256	South_Korea	2023-07-06	XBB.1.5	XBB.1.5.38	XBB.1.5.38	0	0.03	3	70	72.1649	3.09278
hCoV-19/Sweden/M-SUS0021473/2023	BG|XBB.1.5|EPI_ISL_18048710|2023-07-05|Sweden	BG	EPI_ISL_18048710	Sweden	2023-07-05	Others	XBB.1.5	XBB.1.5	0.5	0.03	6	78	80.4124	6.18557
hCoV-19/France/ARA-HCL023110396201/2023	BG|XBB.1.5.89|EPI_ISL_18048974|2023-07-07|France	BG	EPI_ISL_18048974	France	2023-07-07	XBB.1.5	XBB.1.5.89	XBB.1.5.89	0	0.03	5	80	82.4742	5.15464
hCoV-19/France/OCC-HCL723000900201/2023	BG|XBB.1.5.72|EPI_ISL_18049112|2023-07-17|France	BG	EPI_ISL_18049112	France	2023-07-17	XBB.1.5	XBB.1.5.72	XBB.1.5.72	0	0.03	5	78	80.4124	5.15464
hCoV-19/USA/NC-1085-9706/2023	BG|HA.1|EPI_ISL_18049302|2023-07-21|USA	BG	EPI_ISL_18049302	USA	2023-07-21	Others	HA.1	HA.1	0	0.03	5	77	79.3814	5.15464
hCoV-19/USA/NY-GBW-H20-329-7704/2023	BG|XBB.1.5.103|EPI_ISL_18049313|2023-07-20|USA	BG	EPI_ISL_18049313	USA	2023-07-20	Others	XBB.1.5.103	XBB.1.5.103	0	0.03	5	79	81.4433	5.15464
hCoV-19/Germany/BE-RKI-I-1137009/2023	BG|XBB.1.5.72|EPI_ISL_18050073|2023-07-04|Germany	BG	EPI_ISL_18050073	Germany	2023-07-04	XBB.1.5	XBB.1.5.72	XBB.1.5.72	0	0.03	5	78	80.4124	5.15464
hCoV-19/Israel/ICH-741198309/2023	BG|XBB.1.5.72|EPI_ISL_18050837|2023-07-19|Israel	BG	EPI_ISL_18050837	Israel	2023-07-19	XBB.1.5	XBB.1.5.72	XBB.1.5.72	0	0.03	5	74	76.2887	5.15464
hCoV-19/Israel/ICH-741198346/2023	BG|GK.1|EPI_ISL_18050853|2023-07-23|Israel	BG	EPI_ISL_18050853	Israel	2023-07-23	XBB.1.5	GK.1	GK.1	0	0.03	3	70	72.1649	3.09278
hCoV-19/Israel/ICH-741198341/2023	BG|XBB.1.5.77|EPI_ISL_18050854|2023-07-19|Israel	BG	EPI_ISL_18050854	Israel	2023-07-19	Others	XBB.1.5.77	XBB.1.5.77	0	0.03	4	75	77.3196	4.12371
hCoV-19/Denmark/DCGC-647592/2023	BG|XBB.1.5|EPI_ISL_18052056|2023-07-10|Denmark	BG	EPI_ISL_18052056	Denmark	2023-07-10	XBB.1.5	XBB.1.5	XBB.1.5	0	0.03	5	65	67.0103	5.15464
hCoV-19/England/BRBR-32B2D19D/2023	BG|XBB.1.5|EPI_ISL_18052263|2023-07-13|United_Kingdom	BG	EPI_ISL_18052263	United_Kingdom	2023-07-13	XBB.1.5	XBB.1.5	XBB.1.5	0	0.03	5	72	74.2268	5.15464
hCoV-19/England/CLIMB-CM7YMMIG/2023	BG|XBB.1.5|EPI_ISL_18052489|2023-07-15|United_Kingdom	BG	EPI_ISL_18052489	United_Kingdom	2023-07-15	XBB.1.5	XBB.1.5	XBB.1.5.107	0	0.03	5	75	77.3196	5.15464
hCoV-19/Canada/ON-KHS-05307-v1/2023	BG|XBB.1.5|EPI_ISL_18053112|2023-07-24|Canada	BG	EPI_ISL_18053112	Canada	2023-07-24	XBB.1.5	XBB.1.5	XBB.1.5	0	0.03	5	74	76.2887	5.15464
hCoV-19/USA/MN-MDH-35762/2023	BG|XBB.1.5.72|EPI_ISL_18054065|2023-07-04|USA	BG	EPI_ISL_18054065	USA	2023-07-04	XBB.1.5	XBB.1.5.72	XBB.1.5.72	0	0.03	5	74	76.2887	5.15464
hCoV-19/Canada/ON-PHL-23-26922-v2/2023	BG|XBB.1.5|EPI_ISL_18055143|2023-07-13|Canada	BG	EPI_ISL_18055143	Canada	2023-07-13	Others	XBB.1.5	XBB.1.5.110	0	0.03	5	73	75.2577	5.15464
hCoV-19/Canada/ON-PHL-23-26923-v2/2023	BG|XBB.1.5|EPI_ISL_18055144|2023-07-13|Canada	BG	EPI_ISL_18055144	Canada	2023-07-13	XBB.1.5	XBB.1.5	XBB.1.5.110	0	0.03	5	73	75.2577	5.15464
hCoV-19/Canada/ON-PHL-23-27018/2023	BG|XBB.1.5.92|EPI_ISL_18055165|2023-07-17|Canada	BG	EPI_ISL_18055165	Canada	2023-07-17	XBB.1.5	XBB.1.5.92	XBB.1.5.92	0	0.03	5	74	76.2887	5.15464
hCoV-19/Canada/ON-PHL-23-27041/2023	BG|XBB.1.5|EPI_ISL_18055186|2023-07-16|Canada	BG	EPI_ISL_18055186	Canada	2023-07-16	XBB.1.5	XBB.1.5	XBB.1.5	0	0.03	5	73	75.2577	5.15464
hCoV-19/Canada/ON-PHL-23-27044/2023	BG|XBB.1.5|EPI_ISL_18055189|2023-07-19|Canada	BG	EPI_ISL_18055189	Canada	2023-07-19	XBB.1.5	XBB.1.5	XBB.1.5	0.875	0.03	5	75	77.3196	5.15464
hCoV-19/Canada/ON-PHL-23-27047/2023	BG|XBB.1.5|EPI_ISL_18055192|2023-07-18|Canada	BG	EPI_ISL_18055192	Canada	2023-07-18	XBB.1.5	XBB.1.5	XBB.1.5.110	0	0.03	5	74	76.2887	5.15464
hCoV-19/Canada/ON-PHL-23-27049/2023	BG|XBB.1.5.72|EPI_ISL_18055194|2023-07-17|Canada	BG	EPI_ISL_18055194	Canada	2023-07-17	XBB.1.5	XBB.1.5.72	XBB.1.5.72	0	0.03	5	77	79.3814	5.15464
hCoV-19/Canada/ON-PHL-23-27070/2023	BG|XBB.1.5.92|EPI_ISL_18055214|2023-07-19|Canada	BG	EPI_ISL_18055214	Canada	2023-07-19	XBB.1.5	XBB.1.5.92	XBB.1.5.92	0	0.03	5	74	76.2887	5.15464
hCoV-19/Canada/ON-PHL-23-27081/2023	BG|XBB.1.5.72|EPI_ISL_18055225|2023-07-20|Canada	BG	EPI_ISL_18055225	Canada	2023-07-20	XBB.1.5	XBB.1.5.72	XBB.1.5.72	0	0.03	5	76	78.3505	5.15464
hCoV-19/Canada/ON-PHL-23-27083/2023	BG|XBB.1.5.72|EPI_ISL_18055227|2023-07-20|Canada	BG	EPI_ISL_18055227	Canada	2023-07-20	XBB.1.5	XBB.1.5.72	XBB.1.5.72	0	0.03	5	77	79.3814	5.15464
hCoV-19/Canada/ON-PHL-23-27100/2023	BG|XBB.1.5.72|EPI_ISL_18055244|2023-07-17|Canada	BG	EPI_ISL_18055244	Canada	2023-07-17	XBB.1.5	XBB.1.5.72	XBB.1.5.72	0	0.03	5	75	77.3196	5.15464
hCoV-19/Canada/ON-PHL-23-27148/2023	BG|XBB.1.5.72|EPI_ISL_18055288|2023-07-20|Canada	BG	EPI_ISL_18055288	Canada	2023-07-20	XBB.1.5	XBB.1.5.72	XBB.1.5.72	0	0.03	5	76	78.3505	5.15464
hCoV-19/Canada/ON-PHL-23-27152/2023	BG|XBB.1.5.72|EPI_ISL_18055292|2023-07-23|Canada	BG	EPI_ISL_18055292	Canada	2023-07-23	XBB.1.5	XBB.1.5.72	XBB.1.5.72	0	0.03	5	76	78.3505	5.15464
hCoV-19/Canada/ON-PHL-23-27153/2023	BG|XBB.1.5.72|EPI_ISL_18055293|2023-07-20|Canada	BG	EPI_ISL_18055293	Canada	2023-07-20	XBB.1.5	XBB.1.5.72	XBB.1.5.72	0	0.03	5	76	78.3505	5.15464
hCoV-19/Canada/ON-PHL-23-27160/2023	BG|XBB.1.5|EPI_ISL_18055297|2023-07-21|Canada	BG	EPI_ISL_18055297	Canada	2023-07-21	XBB.1.5	XBB.1.5	XBB.1.5.110	0	0.03	5	74	76.2887	5.15464
hCoV-19/Canada/ON-PHL-23-27168/2023	BG|XBB.1.5.72|EPI_ISL_18055305|2023-07-19|Canada	BG	EPI_ISL_18055305	Canada	2023-07-19	XBB.1.5	XBB.1.5.72	XBB.1.5.72	0	0.03	5	77	79.3814	5.15464
hCoV-19/Canada/ON-PHL-23-27283/2023	BG|XBB.1.5|EPI_ISL_18055392|2023-07-24|Canada	BG	EPI_ISL_18055392	Canada	2023-07-24	XBB.1.5	XBB.1.5	XBB.1.5.110	0	0.03	5	75	77.3196	5.15464
hCoV-19/England/CLIMB-CM7YMMW7/2023	BG|XBB.1.5|EPI_ISL_18056731|2023-07-13|United_Kingdom	BG	EPI_ISL_18056731	United_Kingdom	2023-07-13	XBB.1.5	XBB.1.5	XBB.1.5	0	0.03	5	76	78.3505	5.15464
hCoV-19/USA/VA-GBW-H10-015-7127/2023	BG|XBB.1.5.72|EPI_ISL_18056968|2023-07-23|USA	BG	EPI_ISL_18056968	USA	2023-07-23	XBB.1.5	XBB.1.5.72	XBB.1.5.72	0	0.03	5	74	76.2887	5.15464
hCoV-19/USA/TX-HMH-M-130105/2023	BG|XBB.1.5|EPI_ISL_18057041|2023-07-14|USA	BG	EPI_ISL_18057041	USA	2023-07-14	XBB.1.5	XBB.1.5	XBB.1.5	0.666667	0.03	5	74	76.2887	5.15464
hCoV-19/USA/TX-HMH-M-130109/2023	BG|XBB.1.5|EPI_ISL_18057045|2023-07-18|USA	BG	EPI_ISL_18057045	USA	2023-07-18	XBB.1.5	XBB.1.5	XBB.1.5	0.5	0.03	5	71	73.1959	5.15464
hCoV-19/USA/TX-HMH-M-130139/2023	BG|XBB.1.5|EPI_ISL_18057055|2023-07-12|USA	BG	EPI_ISL_18057055	USA	2023-07-12	Others	XBB.1.5	XBB.1.5	0	0.03	5	71	73.1959	5.15464
hCoV-19/USA/TX-HMH-M-130176/2023	BG|XBB.1.5|EPI_ISL_18057069|2023-07-19|USA	BG	EPI_ISL_18057069	USA	2023-07-19	XBB.1.5	XBB.1.5 (consensus call)	XBB.1	0.333333	0.03	5	72	74.2268	5.15464
hCoV-19/USA/TX-HMH-M-130177/2023	BG|XBB.1.5|EPI_ISL_18057070|2023-07-18|USA	BG	EPI_ISL_18057070	USA	2023-07-18	XBB	XBB.1.5	XBB.1.5	0	0.03	5	70	72.1649	5.15464
hCoV-19/USA/TX-HMH-M-130055/2023	BG|XBB.1.5|EPI_ISL_18057117|2023-07-12|USA	BG	EPI_ISL_18057117	USA	2023-07-12	XBB.1.5	XBB.1.5	XBB.1.5	0.5	0.03	5	72	74.2268	5.15464
hCoV-19/USA/TX-HMH-M-130058/2023	BG|XBB.1.5|EPI_ISL_18057161|2023-07-14|USA	BG	EPI_ISL_18057161	USA	2023-07-14	Others	XBB.1.5 (consensus call)	XBB.1	0	0.03	5	75	77.3196	5.15464
hCoV-19/USA/TX-HMH-M-130286/2023	BG|XBB.1.5|EPI_ISL_18057222|2023-07-21|USA	BG	EPI_ISL_18057222	USA	2023-07-21	XBB.1.5	XBB.1.5 (consensus call)	XBB.1	0	0.03	5	72	74.2268	5.15464
hCoV-19/USA/TX-HMH-M-130349/2023	BG|XBB.1.5|EPI_ISL_18057243|2023-07-23|USA	BG	EPI_ISL_18057243	USA	2023-07-23	XBB	XBB.1.5 (consensus call)	XBB.1	0.75	0.03	5	74	76.2887	5.15464
hCoV-19/USA/TX-HMH-M-129957/2023	BG|XBB.1.5|EPI_ISL_18057525|2023-07-07|USA	BG	EPI_ISL_18057525	USA	2023-07-07	XBB.1.5	XBB.1.5	XBB.1.5	0.666667	0.03	5	75	77.3196	5.15464
hCoV-19/USA/TX-HMH-M-130005/2023	BG|XBB.1.5|EPI_ISL_18057572|2023-07-15|USA	BG	EPI_ISL_18057572	USA	2023-07-15	XBB.1.5	XBB.1.5 (consensus call)	XBB.1	0.4	0.03	5	75	77.3196	5.15464
hCoV-19/USA/TX-HMH-M-130013/2023	BG|XBB.1.5|EPI_ISL_18057580|2023-07-12|USA	BG	EPI_ISL_18057580	USA	2023-07-12	XBB.1.5	XBB.1.5 (consensus call)	XBB.1	0.5	0.03	5	71	73.1959	5.15464
hCoV-19/USA/TX-HMH-M-129846/2023	BG|XBB.1.5|EPI_ISL_18057603|2023-07-10|USA	BG	EPI_ISL_18057603	USA	2023-07-10	XBB.1.5	XBB.1.5 (consensus call)	XBB.1	0.625	0.03	5	72	74.2268	5.15464
hCoV-19/USA/TX-HMH-M-129868/2023	BG|XBB.1.22|EPI_ISL_18057623|2023-07-05|USA	BG	EPI_ISL_18057623	USA	2023-07-05	XBB.1.5	XBB.1.22	XBB.1.22	0.333333	0.03	5	72	74.2268	5.15464
hCoV-19/USA/TX-HMH-M-129856/2023	BG|XBB.1.5|EPI_ISL_18057635|2023-07-06|USA	BG	EPI_ISL_18057635	USA	2023-07-06	XBB.1.5	XBB.1.5	XBB.1.5	0.333333	0.03	5	69	71.134	5.15464
hCoV-19/USA/TX-HMH-M-129857/2023	BG|XBB.1.22|EPI_ISL_18057636|2023-07-05|USA	BG	EPI_ISL_18057636	USA	2023-07-05	XBB.1.5	XBB.1.22	XBB.1.22	0.5	0.03	5	72	74.2268	5.15464
hCoV-19/USA/IL-RIPHL_121895_G/2023	BG|XBB.1.5.72|EPI_ISL_18058049|2023-07-05|USA	BG	EPI_ISL_18058049	USA	2023-07-05	XBB.1.5	XBB.1.5.72	XBB.1.5.72	0	0.03	5	76	78.3505	5.15464
hCoV-19/USA/UT-UPHL-230728916815/2023	BG|XBB.1.5|EPI_ISL_18058208|2023-07-13|USA	BG	EPI_ISL_18058208	USA	2023-07-13	Others	XBB.1.5	XBB.1.5	0	0.03	5	74	76.2887	5.15464
hCoV-19/Dominican Republic/2155936-LNSPDD/2023	BG|XBB.1.5|EPI_ISL_18058242|2023-07-12|Dominican_Republic	BG	EPI_ISL_18058242	Dominican_Republic	2023-07-12	XBB.1.5	XBB.1.5	XBB.1.5	0.75	0.03	5	76	78.3505	5.15464
hCoV-19/Dominican Republic/2155941-LNSPDD/2023	BG|XBB.1.5|EPI_ISL_18058243|2023-07-12|Dominican_Republic	BG	EPI_ISL_18058243	Dominican_Republic	2023-07-12	XBB.1.5	XBB.1.5	XBB.1.5	0	0.03	5	75	77.3196	5.15464
hCoV-19/Dominican Republic/2155952-LNSPDD/2023	BG|XBB.1.5|EPI_ISL_18058245|2023-07-18|Dominican_Republic	BG	EPI_ISL_18058245	Dominican_Republic	2023-07-18	XBB.1.5	XBB.1.5	XBB.1.5	0.333333	0.03	5	74	76.2887	5.15464
hCoV-19/Spain/VC-FISABIO-118650/2023	BG|XBB.1.5|EPI_ISL_18059169|2023-07-10|Spain	BG	EPI_ISL_18059169	Spain	2023-07-10	XBB.1.5	XBB.1.5	XBB.1.5.107	0	0.03	5	73	75.2577	5.15464
hCoV-19/Spain/VC-FISABIO-118653/2023	BG|XBB.1.5|EPI_ISL_18059172|2023-07-11|Spain	BG	EPI_ISL_18059172	Spain	2023-07-11	XBB.1.5	XBB.1.5	XBB.1.5.107	0	0.03	5	73	75.2577	5.15464
hCoV-19/Spain/VC-FISABIO-118658/2023	BG|XBB.1.5|EPI_ISL_18059174|2023-07-13|Spain	BG	EPI_ISL_18059174	Spain	2023-07-13	XBB.1.5	XBB.1.5	XBB.1.5.107	0	0.03	5	73	75.2577	5.15464
hCoV-19/Canada/NB-CHUDGLD-13G-MM00018R/2023	BG|XBB.1.5|EPI_ISL_18059715|2023-07-13|Canada	BG	EPI_ISL_18059715	Canada	2023-07-13	XBB.1.5	XBB.1.5	XBB.1.5	0	0.03	5	72	74.2268	5.15464
hCoV-19/Australia/WA14814/2023	BG|XBB.1.5|EPI_ISL_18060319|2023-07-12|Australia	BG	EPI_ISL_18060319	Australia	2023-07-12	XBB.1.5	XBB.1.5	XBB.1.5	0	0.03	5	79	81.4433	5.15464
hCoV-19/Australia/WA14921/2023	BG|HR.1|EPI_ISL_18060426|2023-07-21|Australia	BG	EPI_ISL_18060426	Australia	2023-07-21	XBB.1.5	HR.1	HR.1.1	0	0.03	5	82	84.5361	5.15464
hCoV-19/USA/IA-SHL-2310643/2023	BG|XBB.1.5.72|EPI_ISL_18061008|2023-07-14|USA	BG	EPI_ISL_18061008	USA	2023-07-14	Others	XBB.1.5.72	XBB.1.5.72	0	0.03	5	76	78.3505	5.15464
hCoV-19/Israel/SMC-7114398/2023	BG|XBB.1.5.89|EPI_ISL_18062754|2023-07-06|Israel	BG	EPI_ISL_18062754	Israel	2023-07-06	XBB.1.5	XBB.1.5.89	XBB.1.5.89	0	0.03	5	73	75.2577	5.15464
hCoV-19/South Korea/KDCA253490/2023	BG|XBB.1.5.77|EPI_ISL_18062941|2023-07-09|South_Korea	BG	EPI_ISL_18062941	South_Korea	2023-07-09	XBB.1.5	XBB.1.5.77	XBB.1.5.77	0	0.03	5	70	72.1649	5.15464
hCoV-19/South Korea/KDCA255223/2023	BG|XBB.1.5|EPI_ISL_18063025|2023-07-21|South_Korea	BG	EPI_ISL_18063025	South_Korea	2023-07-21	XBB.1.5	XBB.1.5	XBB.1.5	0	0.03	5	72	74.2268	5.15464
hCoV-19/South Korea/KDCA254240/2023	BG|XBB.1.5|EPI_ISL_18063102|2023-07-11|South_Korea	BG	EPI_ISL_18063102	South_Korea	2023-07-11	XBB.1.5	XBB.1.5	XBB.1.5	0	0.03	5	62	63.9175	5.15464
hCoV-19/Spain/PV-HUD-96094100/2023	BG|XBB.1.5.72|EPI_ISL_18063215|2023-07-23|Spain	BG	EPI_ISL_18063215	Spain	2023-07-23	XBB.1.5	XBB.1.5.72	XBB.1.5.72	0	0.03	4	68	70.1031	4.12371
hCoV-19/USA/IL-RIPHL_13587_G/2023	BG|XBB.1.5.72|EPI_ISL_18065599|2023-07-08|USA	BG	EPI_ISL_18065599	USA	2023-07-08	XBB.1.5	XBB.1.5.72	XBB.1.5.72	0	0.03	5	76	78.3505	5.15464
hCoV-19/USA/IL-RIPHL_13590_G/2023	BG|XBB.1.5|EPI_ISL_18065602|2023-07-09|USA	BG	EPI_ISL_18065602	USA	2023-07-09	XBB.1.5	XBB.1.5	XBB.1.5	0.5	0.03	5	69	71.134	5.15464
hCoV-19/Japan/PG-545249/2023	BG|XBB.1.5|EPI_ISL_18066263|2023-07-05|Japan	BG	EPI_ISL_18066263	Japan	2023-07-05	XBB.1.5	XBB.1.5	XBB.1.5	0	0.03	5	70	72.1649	5.15464
hCoV-19/Japan/PG-548183/2023	BG|XBB.1.5|EPI_ISL_18066389|2023-07-12|Japan	BG	EPI_ISL_18066389	Japan	2023-07-12	XBB.1.5	XBB.1.5	XBB.1.5	0	0.03	5	67	69.0722	5.15464
hCoV-19/Taiwan/CDC-W30393/2023	BG|XBB.1.5|EPI_ISL_18067341|2023-07-18|Taiwan	BG	EPI_ISL_18067341	Taiwan	2023-07-18	XBB.1.5	XBB.1.5	XBB.1.5	0.666667	0.03	5	73	75.2577	5.15464
hCoV-19/South Korea/KDCA254058/2023	BG|XBB.1.5|EPI_ISL_18067510|2023-07-10|South_Korea	BG	EPI_ISL_18067510	South_Korea	2023-07-10	XBB.1.5	XBB.1.5	XBB.1.5	0	0.03	3	72	74.2268	3.09278
hCoV-19/South Korea/KDCA254105/2023	BG|XBB.1.5|EPI_ISL_18067553|2023-07-10|South_Korea	BG	EPI_ISL_18067553	South_Korea	2023-07-10	XBB.1.5	XBB.1.5	XBB.1.5	0	0.03	3	73	75.2577	3.09278
hCoV-19/South Korea/KDCA254388/2023	BG|XBB.1.5.73|EPI_ISL_18067797|2023-07-11|South_Korea	BG	EPI_ISL_18067797	South_Korea	2023-07-11	XBB.1.5	XBB.1.5.73	XBB.1.5.73	0	0.03	3	69	71.134	3.09278
hCoV-19/South Korea/KDCA254497/2023	BG|XBB.1.5|EPI_ISL_18068008|2023-07-12|South_Korea	BG	EPI_ISL_18068008	South_Korea	2023-07-12	XBB.1.5	XBB.1.5	XBB.1.5	0	0.03	3	67	69.0722	3.09278
hCoV-19/South Korea/KDCA254622/2023	BG|XBB.1.5|EPI_ISL_18068092|2023-07-14|South_Korea	BG	EPI_ISL_18068092	South_Korea	2023-07-14	XBB.1.5	XBB.1.5	XBB.1.5	0	0.03	5	75	77.3196	5.15464
hCoV-19/South Korea/KDCA254940/2023	BG|XBB.1.5.72|EPI_ISL_18068360|2023-07-16|South_Korea	BG	EPI_ISL_18068360	South_Korea	2023-07-16	XBB.1.5	XBB.1.5.72	XBB.1.5.72	0	0.03	5	73	75.2577	5.15464
hCoV-19/USA/CA-HLX-STM-JAWHDYUAP/2023	BG|HR.1|EPI_ISL_18069941|2023-07-15|USA	BG	EPI_ISL_18069941	USA	2023-07-15	XBB.1.5	HR.1	HR.1.1	0	0.03	4	63	64.9485	4.12371
hCoV-19/France/NAQ-HCL723000903601/2023	BG|JD.1.1|EPI_ISL_18070073|2023-07-17|France	BG	EPI_ISL_18070073	France	2023-07-17	XBB.1.5	JD.1.1	JD.1.1	0	0.03	5	76	78.3505	5.15464
hCoV-19/France/NAQ-HCL723000903701/2023	BG|XBB.1.5|EPI_ISL_18070074|2023-07-17|France	BG	EPI_ISL_18070074	France	2023-07-17	Others	XBB.1.5	XBB.1.5	0.5	0.03	5	76	78.3505	5.15464
hCoV-19/Costa Rica/INC-11724-801274/2023	BG|XBB.1.5|EPI_ISL_18071444|2023-07-12|Costa_Rica	BG	EPI_ISL_18071444	Costa_Rica	2023-07-12	XBB.1.5	XBB.1.5	XBB.1.5	0	0.03	5	74	76.2887	5.15464
hCoV-19/Costa Rica/INC-11725-801275/2023	BG|XBB.1.5|EPI_ISL_18071445|2023-07-13|Costa_Rica	BG	EPI_ISL_18071445	Costa_Rica	2023-07-13	XBB.1.5	XBB.1.5	XBB.1.5	0	0.03	5	78	80.4124	5.15464
hCoV-19/Costa Rica/INC-11728-801426/2023	BG|XBB.1.5|EPI_ISL_18071448|2023-07-16|Costa_Rica	BG	EPI_ISL_18071448	Costa_Rica	2023-07-16	XBB.1.5	XBB.1.5	XBB.1.5	0	0.03	5	79	81.4433	5.15464
hCoV-19/Costa Rica/INC-11744-801855/2023	BG|XBB.1.5|EPI_ISL_18071464|2023-07-13|Costa_Rica	BG	EPI_ISL_18071464	Costa_Rica	2023-07-13	Others	XBB.1.5	XBB.1.5	0.833333	0.03	4	74	76.2887	4.12371
hCoV-19/Costa Rica/INC-11755-801866/2023	BG|XBB.1.5|EPI_ISL_18071474|2023-07-18|Costa_Rica	BG	EPI_ISL_18071474	Costa_Rica	2023-07-18	Others	XBB.1.5	XBB.1.5	0	0.03	5	77	79.3814	5.15464
hCoV-19/Costa Rica/INC-11717-801093/2023	BG|XBB.1.5|EPI_ISL_18071492|2023-07-03|Costa_Rica	BG	EPI_ISL_18071492	Costa_Rica	2023-07-03	XBB.1.5	XBB.1.5	XBB.1.5	0	0.03	3	69	71.134	3.09278
hCoV-19/Costa Rica/INC-11670-800153/2023	BG|XBB.1.5|EPI_ISL_18071534|2023-07-03|Costa_Rica	BG	EPI_ISL_18071534	Costa_Rica	2023-07-03	XBB.1.5	XBB.1.5	XBB.1.5	0.5	0.03	5	77	79.3814	5.15464
hCoV-19/Costa Rica/INC-11685-800449/2023	BG|XBB.1.5|EPI_ISL_18071547|2023-07-03|Costa_Rica	BG	EPI_ISL_18071547	Costa_Rica	2023-07-03	XBB.1.5	XBB.1.5	XBB.1.5	0	0.03	5	76	78.3505	5.15464
hCoV-19/Colombia/DC-INS-VG-30289/2023	BG|XBB.1.5|EPI_ISL_18071787|2023-07-09|Colombia	BG	EPI_ISL_18071787	Colombia	2023-07-09	XBB.1.5	XBB.1.5	XBB.1.5	0.666667	0.03	5	74	76.2887	5.15464
hCoV-19/Colombia/DC-INS-VG-30410/2023	BG|XBB.1.5|EPI_ISL_18071798|2023-07-04|Colombia	BG	EPI_ISL_18071798	Colombia	2023-07-04	XBB.1.5	XBB.1.5	XBB.1.5	0	0.03	5	71	73.1959	5.15464
hCoV-19/Colombia/SAN-INS-VG-30347/2023	BG|XBB.1.5.77|EPI_ISL_18071800|2023-07-04|Colombia	BG	EPI_ISL_18071800	Colombia	2023-07-04	XBB.1.5	XBB.1.5.77	XBB.1.5.77	0	0.03	5	77	79.3814	5.15464
hCoV-19/Colombia/DC-INS-VG-30333/2023	BG|XBB.1.5.77|EPI_ISL_18071823|2023-07-13|Colombia	BG	EPI_ISL_18071823	Colombia	2023-07-13	XBB.1.5	XBB.1.5.77	XBB.1.5.77	0	0.03	5	74	76.2887	5.15464
hCoV-19/Colombia/HUI-INS-VG-30344/2023	BG|XBB.1.5.72|EPI_ISL_18071831|2023-07-15|Colombia	BG	EPI_ISL_18071831	Colombia	2023-07-15	XBB.1.5	XBB.1.5.72	XBB.1.5.72	0	0.03	5	74	76.2887	5.15464
hCoV-19/Colombia/ANT-INS-VG-30322/2023	BG|XBB.1.5.77|EPI_ISL_18071833|2023-07-06|Colombia	BG	EPI_ISL_18071833	Colombia	2023-07-06	XBB.1.5	XBB.1.5.77	XBB.1.5.77	0	0.03	5	74	76.2887	5.15464
hCoV-19/Italy/VEN-IZSVe-23RS8177-3_TV/2023	BG|XBB.1.5.89|EPI_ISL_18071906|2023-07-15|Italy	BG	EPI_ISL_18071906	Italy	2023-07-15	Others	XBB.1.5.89	XBB.1.5.89	0	0.03	5	79	81.4433	5.15464
hCoV-19/Georgia/Tb-s7754/2023	BG|XBB.1.5|EPI_ISL_18072194|2023-07-19|Georgia	BG	EPI_ISL_18072194	Georgia	2023-07-19	XBB.1.5	XBB.1.5	XBB.1.5	0	0.03	5	75	77.3196	5.15464
hCoV-19/env/Italy/PIE-ARPA-BL00341NO/2023	BG|XBB.1.5|EPI_ISL_18072212|2023-07-03|Italy	BG	EPI_ISL_18072212	Italy	2023-07-03	XBB	XBB.1.5	XBB.1.5	0	0.03	5	73	75.2577	5.15464
hCoV-19/env/Italy/PIE-ARPA-BL00343CN/2023	BG|XBB.1.5|EPI_ISL_18072213|2023-07-05|Italy	BG	EPI_ISL_18072213	Italy	2023-07-05	XBB.1.5	XBB.1.5 (consensus call)	XBB.1	0.8	0.03	5	70	72.1649	5.15464
hCoV-19/env/Italy/PIE-ARPA-BL00345TO/2023	BG|XBB.1.22|EPI_ISL_18072215|2023-07-10|Italy	BG	EPI_ISL_18072215	Italy	2023-07-10	XBB	XBB.1.22	XBB.1.22	0.5	0.03	5	69	71.134	5.15464
hCoV-19/env/Italy/PIE-ARPA-BL00355NO/2023	BG|XBB.1.5|EPI_ISL_18072216|2023-07-10|Italy	BG	EPI_ISL_18072216	Italy	2023-07-10	XBB	XBB.1.5 (consensus call)	XBB.1	0	0.03	5	72	74.2268	5.15464
hCoV-19/USA/NE-NPHL-1624/2023	BG|XBB.1.5|EPI_ISL_18072345|2023-07-03|USA	BG	EPI_ISL_18072345	USA	2023-07-03	XBB	XBB.1.5	XBB.1.5	0.5	0.03	5	71	73.1959	5.15464
hCoV-19/USA/CA-SFDPH-M18825/2023	BG|XBB.1.5.77|EPI_ISL_18072853|2023-07-24|USA	BG	EPI_ISL_18072853	USA	2023-07-24	XBB.1.5	XBB.1.5.77	XBB.1.5.77	0	0.03	5	69	71.134	5.15464
hCoV-19/USA/NM-NMDOH-2023031039/2023	BG|XBB.1.5|EPI_ISL_18073864|2023-07-05|USA	BG	EPI_ISL_18073864	USA	2023-07-05	XBB.1.5	XBB.1.5	XBB.1.5	0.5	0.03	5	76	78.3505	5.15464
hCoV-19/USA/NY-Wadsworth-23037381-01/2023	BG|XBB.1.5.106|EPI_ISL_18075270|2023-07-01|USA	BG	EPI_ISL_18075270	USA	2023-07-01	XBB.1.5	XBB.1.5.106	XBB.1.5.106	0	0.03	5	72	74.2268	5.15464
hCoV-19/Spain/PV-HUD-70038353/2023	BG|XBB.1.5|EPI_ISL_18075740|2023-07-28|Spain	BG	EPI_ISL_18075740	Spain	2023-07-28	XBB.1.5	XBB.1.5	XBB.1.5	0.666667	0.03	5	72	74.2268	5.15464
hCoV-19/Spain/PV-HUD-70038722/2023	BG|XBB.1.5.72|EPI_ISL_18075744|2023-07-29|Spain	BG	EPI_ISL_18075744	Spain	2023-07-29	XBB.1.5	XBB.1.5.72	XBB.1.5.72	0	0.03	6	77	79.3814	6.18557
hCoV-19/France/IDF-IPP16404/2023	BG|XBB.1.5.77|EPI_ISL_18075987|2023-07-17|France	BG	EPI_ISL_18075987	France	2023-07-17	XBB.1.5	XBB.1.5.77	XBB.1.5.77	0	0.03	5	78	80.4124	5.15464
hCoV-19/France/NOR-CHURouen-32845110/2023	BG|XBB.1.5|EPI_ISL_18076014|2023-07-12|France	BG	EPI_ISL_18076014	France	2023-07-12	XBB.1.5	XBB.1.5	XBB.1.5	0.666667	0.03	4	75	77.3196	4.12371
hCoV-19/France/IDF-IPP16260/2023	BG|XBB.1.5.77|EPI_ISL_18076093|2023-07-10|France	BG	EPI_ISL_18076093	France	2023-07-10	XBB.1.5	XBB.1.5.77	XBB.1.5.77	0	0.03	5	78	80.4124	5.15464
hCoV-19/Ireland/G-GUH-N1440/2023	BG|XBB.1.5.72|EPI_ISL_18076176|2023-07-26|Ireland	BG	EPI_ISL_18076176	Ireland	2023-07-26	XBB.1.5	XBB.1.5.72	XBB.1.5.72	0	0.03	5	75	77.3196	5.15464
hCoV-19/Canada/ON-KHS-05363-v1/2023	BG|XBB.1.5|EPI_ISL_18076233|2023-07-28|Canada	BG	EPI_ISL_18076233	Canada	2023-07-28	XBB.1.5	XBB.1.5	XBB.1.5	0	0.03	5	75	77.3196	5.15464
hCoV-19/Canada/ON-PHL-23-27356/2023	BG|XBB.1.5|EPI_ISL_18076446|2023-07-26|Canada	BG	EPI_ISL_18076446	Canada	2023-07-26	XBB.1.5	XBB.1.5	XBB.1.5	0	0.03	5	69	71.134	5.15464
hCoV-19/Canada/ON-PHL-23-27399/2023	BG|XBB.1.5|EPI_ISL_18076482|2023-07-30|Canada	BG	EPI_ISL_18076482	Canada	2023-07-30	XBB.1.5	XBB.1.5	XBB.1.5.110	0	0.03	5	74	76.2887	5.15464
hCoV-19/Ecuador/GENSBIO-INSPI-104203/2023	BG|XBB.1.5.77|EPI_ISL_18076697|2023-07-25|Ecuador	BG	EPI_ISL_18076697	Ecuador	2023-07-25	XBB.1.5	XBB.1.5.77	XBB.1.5.77	0	0.03	5	75	77.3196	5.15464
hCoV-19/Colombia/DC-INS-VG-30269/2023	BG|XBB.1.5|EPI_ISL_18076894|2023-07-05|Colombia	BG	EPI_ISL_18076894	Colombia	2023-07-05	XBB.1.5	XBB.1.5	XBB.1.5	0.666667	0.03	5	73	75.2577	5.15464
hCoV-19/Colombia/DC-INS-VG-30208/2023	BG|XBB.1.5.72|EPI_ISL_18076906|2023-07-13|Colombia	BG	EPI_ISL_18076906	Colombia	2023-07-13	XBB.1.5	XBB.1.5.72	XBB.1.5.72	0	0.03	5	74	76.2887	5.15464
hCoV-19/Colombia/MET-INS-VG-30249/2023	BG|XBB.1.5.72|EPI_ISL_18076908|2023-07-06|Colombia	BG	EPI_ISL_18076908	Colombia	2023-07-06	XBB.1.5	XBB.1.5.72	XBB.1.5.72	0	0.03	5	76	78.3505	5.15464
hCoV-19/Colombia/MET-INS-VG-30252/2023	BG|XBB.1.5.72|EPI_ISL_18076909|2023-07-05|Colombia	BG	EPI_ISL_18076909	Colombia	2023-07-05	XBB.1.5	XBB.1.5.72	XBB.1.5.72	0	0.03	5	76	78.3505	5.15464
hCoV-19/Colombia/MET-INS-VG-30253/2023	BG|XBB.1.5.72|EPI_ISL_18076910|2023-07-05|Colombia	BG	EPI_ISL_18076910	Colombia	2023-07-05	XBB.1.5	XBB.1.5.72	XBB.1.5.72	0	0.03	5	77	79.3814	5.15464
hCoV-19/Colombia/DC-INS-VG-30274/2023	BG|XBB.1.5.72|EPI_ISL_18076912|2023-07-05|Colombia	BG	EPI_ISL_18076912	Colombia	2023-07-05	XBB.1.5	XBB.1.5.72	XBB.1.5.72	0	0.03	5	77	79.3814	5.15464
hCoV-19/Colombia/MET-INS-VG-30245/2023	BG|XBB.1.5.72|EPI_ISL_18076913|2023-07-10|Colombia	BG	EPI_ISL_18076913	Colombia	2023-07-10	XBB.1.5	XBB.1.5.72	XBB.1.5.72	0	0.03	5	77	79.3814	5.15464
hCoV-19/Colombia/DC-INS-VG-30282/2023	BG|XBB.1.5.77|EPI_ISL_18076933|2023-07-06|Colombia	BG	EPI_ISL_18076933	Colombia	2023-07-06	XBB.1.5	XBB.1.5.77	XBB.1.5.77	0	0.03	5	74	76.2887	5.15464
hCoV-19/Colombia/DC-INS-VG-30221/2023	BG|XBB.1.5.77|EPI_ISL_18076934|2023-07-15|Colombia	BG	EPI_ISL_18076934	Colombia	2023-07-15	XBB.1.5	XBB.1.5.77	XBB.1.5.77	0	0.03	5	78	80.4124	5.15464
hCoV-19/Colombia/DC-INS-VG-30216/2023	BG|XBB.1.5.77|EPI_ISL_18076935|2023-07-13|Colombia	BG	EPI_ISL_18076935	Colombia	2023-07-13	XBB.1.5	XBB.1.5.77	XBB.1.5.77	0.666667	0.03	6	76	78.3505	6.18557
hCoV-19/Colombia/MET-INS-VG-30250/2023	BG|XBB.1.5.77|EPI_ISL_18076937|2023-07-06|Colombia	BG	EPI_ISL_18076937	Colombia	2023-07-06	XBB.1.5	XBB.1.5.77	XBB.1.5.77	0	0.03	5	72	74.2268	5.15464
hCoV-19/Colombia/DC-INS-VG-30273/2023	BG|XBB.1.5.77|EPI_ISL_18076940|2023-07-11|Colombia	BG	EPI_ISL_18076940	Colombia	2023-07-11	XBB.1.5	XBB.1.5.77	XBB.1.5.77	0	0.03	5	77	79.3814	5.15464
hCoV-19/Colombia/DC-INS-VG-30285/2023	BG|XBB.1.5.77|EPI_ISL_18076942|2023-07-11|Colombia	BG	EPI_ISL_18076942	Colombia	2023-07-11	XBB.1.5	XBB.1.5.77	XBB.1.5.77	0	0.03	5	82	84.5361	5.15464
hCoV-19/Colombia/DC-INS-VG-30287/2023	BG|XBB.1.5.77|EPI_ISL_18076943|2023-07-13|Colombia	BG	EPI_ISL_18076943	Colombia	2023-07-13	XBB.1.5	XBB.1.5.77	XBB.1.5.77	0	0.03	5	77	79.3814	5.15464
hCoV-19/Colombia/HUI-INS-VG-30240/2023	BG|XBB.1.5.77|EPI_ISL_18076944|2023-07-07|Colombia	BG	EPI_ISL_18076944	Colombia	2023-07-07	XBB.1.5	XBB.1.5.77	XBB.1.5.77	0	0.03	5	78	80.4124	5.15464
hCoV-19/Colombia/HUI-INS-VG-30243/2023	BG|XBB.1.5.77|EPI_ISL_18076945|2023-07-13|Colombia	BG	EPI_ISL_18076945	Colombia	2023-07-13	XBB.1.5	XBB.1.5.77	XBB.1.5.77	0	0.03	5	79	81.4433	5.15464
hCoV-19/Colombia/MET-INS-VG-30244/2023	BG|XBB.1.5.77|EPI_ISL_18076946|2023-07-12|Colombia	BG	EPI_ISL_18076946	Colombia	2023-07-12	XBB.1.5	XBB.1.5.77	XBB.1.5.77	0	0.03	5	73	75.2577	5.15464
hCoV-19/USA/TX-UHS-UTHSA8043-P0/2023	BG|XBB.1.5|EPI_ISL_18076968|2023-07-14|USA	BG	EPI_ISL_18076968	USA	2023-07-14	XBB.1.5	XBB.1.5	XBB.1.5	0.5	0.03	5	74	76.2887	5.15464
hCoV-19/Spain/PV-HUD-61706570/2023	BG|XBB.1.5|EPI_ISL_18078430|2023-08-03|Spain	BG	EPI_ISL_18078430	Spain	2023-08-03	XBB.1.5	XBB.1.5	XBB.1.5	0	0.03	4	65	67.0103	4.12371
hCoV-19/USA/NV-SNPHL-773424/2023	BG|XBB.1.5|EPI_ISL_18078847|2023-07-25|USA	BG	EPI_ISL_18078847	USA	2023-07-25	XBB.1.5	XBB.1.5	XBB.1.5	0.666667	0.03	3	70	72.1649	3.09278
hCoV-19/Spain/CT-HCB-3662/2023	BG|XBB.1.5|EPI_ISL_18079029|2023-07-18|Spain	BG	EPI_ISL_18079029	Spain	2023-07-18	XBB.1.5	XBB.1.5	XBB.1.5	0	0.03	5	73	75.2577	5.15464
hCoV-19/USA/AK-PHL25026/2023	BG|XBB.1.5|EPI_ISL_18080472|2023-07-05|USA	BG	EPI_ISL_18080472	USA	2023-07-05	XBB.1.5	XBB.1.5	XBB.1.5	0	0.03	5	76	78.3505	5.15464
hCoV-19/USA/CA-CDPH-500118887/2023	BG|XBB.1.5|EPI_ISL_18080713|2023-07-06|USA	BG	EPI_ISL_18080713	USA	2023-07-06	Others	XBB.1.5	XBB.1.5	0.666667	0.03	5	74	76.2887	5.15464
hCoV-19/USA/CA-CDPH-500118443/2023	BG|XBB.1.5|EPI_ISL_18080757|2023-07-02|USA	BG	EPI_ISL_18080757	USA	2023-07-02	XBB.1.5	XBB.1.5	XBB.1.5	0.5	0.03	5	72	74.2268	5.15464
hCoV-19/USA/CA-CDPH-500118463/2023	BG|XBB.1.5|EPI_ISL_18080759|2023-07-03|USA	BG	EPI_ISL_18080759	USA	2023-07-03	XBB.1.5	XBB.1.5	XBB.1.5	0.333333	0.03	5	69	71.134	5.15464
hCoV-19/USA/CA-CDPH-500118704/2023	BG|XBB.1.5|EPI_ISL_18080921|2023-07-10|USA	BG	EPI_ISL_18080921	USA	2023-07-10	XBB.1.5	XBB.1.5	XBB.1.5	0	0.03	5	73	75.2577	5.15464
hCoV-19/USA/CA-CDPH-500118780/2023	BG|XBB.1.5|EPI_ISL_18080959|2023-07-06|USA	BG	EPI_ISL_18080959	USA	2023-07-06	XBB.1.5	XBB.1.5	XBB.1.5	0.666667	0.03	5	76	78.3505	5.15464
hCoV-19/USA/CA-CDPH-500118414/2023	BG|XBB.1.5.100|EPI_ISL_18081051|2023-07-03|USA	BG	EPI_ISL_18081051	USA	2023-07-03	XBB.1.5	XBB.1.5.100	XBB.1.5.100	0.666667	0.03	5	75	77.3196	5.15464
hCoV-19/USA/CA-CDPH-500118415/2023	BG|XBB.1.5|EPI_ISL_18081052|2023-07-01|USA	BG	EPI_ISL_18081052	USA	2023-07-01	XBB.1.5	XBB.1.5	XBB.1.5	0	0.03	5	74	76.2887	5.15464
hCoV-19/USA/MI-UM-10052222810/2023	BG|XBB.1.5|EPI_ISL_18081321|2023-07-07|USA	BG	EPI_ISL_18081321	USA	2023-07-07	XBB.1.5	XBB.1.5	XBB.1.5	0	0.03	5	73	75.2577	5.15464
hCoV-19/USA/CA-HLX-STM-Y3FPZ5BTB/2023	BG|XBB.1.5.104|EPI_ISL_18081432|2023-07-16|USA	BG	EPI_ISL_18081432	USA	2023-07-16	XBB.1.5	XBB.1.5.104	XBB.1.5.104	0	0.03	3	61	62.8866	3.09278
hCoV-19/USA/CA-Stanford-151_S21/2023	BG|XBB.1.5|EPI_ISL_18082020|2023-07-09|USA	BG	EPI_ISL_18082020	USA	2023-07-09	XBB.1.5	XBB.1.5	XBB.1.5	0	0.03	5	79	81.4433	5.15464
hCoV-19/USA/TX-KVI301594/2023	BG|XBB.1.5|EPI_ISL_18082203|2023-07-09|USA	BG	EPI_ISL_18082203	USA	2023-07-09	XBB.1.5	XBB.1.5	XBB.1.5	0	0.03	5	81	83.5052	5.15464
hCoV-19/USA/TX-KVI301609/2023	BG|XBB.1.5|EPI_ISL_18082205|2023-07-10|USA	BG	EPI_ISL_18082205	USA	2023-07-10	XBB.1.5	XBB.1.5	XBB.1.5	0.666667	0.03	5	70	72.1649	5.15464
hCoV-19/USA/TX-KVI301643/2023	BG|XBB.1.5|EPI_ISL_18082219|2023-07-05|USA	BG	EPI_ISL_18082219	USA	2023-07-05	XBB.1.5	XBB.1.5	XBB.1.5.107	0.5	0.03	5	72	74.2268	5.15464
hCoV-19/USA/TX-KVI301648/2023	BG|XBB.1.5|EPI_ISL_18082223|2023-07-20|USA	BG	EPI_ISL_18082223	USA	2023-07-20	XBB.1.5	XBB.1.5	XBB.1.5	0.5	0.03	5	72	74.2268	5.15464
hCoV-19/Japan/PG-554212/2023	BG|XBB.1.5|EPI_ISL_18082987|2023-07-20|Japan	BG	EPI_ISL_18082987	Japan	2023-07-20	XBB.1.5	XBB.1.5	XBB.1.5	0	0.03	5	68	70.1031	5.15464
hCoV-19/USA/CO-CDPHE-41123805/2023	BG|XBB.1.5|EPI_ISL_18093322|2023-07-12|USA	BG	EPI_ISL_18093322	USA	2023-07-12	XBB.1.5	XBB.1.5	XBB.1.5	0	0.03	5	78	80.4124	5.15464
hCoV-19/USA/CO-CDPHE-41136114/2023	BG|XBB.1.5.40|EPI_ISL_18093550|2023-07-10|USA	BG	EPI_ISL_18093550	USA	2023-07-10	XBB.1.5	XBB.1.5.40	XBB.1.5.40	0	0.03	6	79	81.4433	6.18557
hCoV-19/England/CLIMB-CM7Y81JM/2023	BG|XBB.1.5|EPI_ISL_18094222|2023-07-23|United_Kingdom	BG	EPI_ISL_18094222	United_Kingdom	2023-07-23	XBB.1.5	XBB.1.5	XBB.1.5	0.5	0.03	5	73	75.2577	5.15464
hCoV-19/USA/WA-GBW-H10-015-9793/2023	BG|JD.1|EPI_ISL_18094924|2023-08-02|USA	BG	EPI_ISL_18094924	USA	2023-08-02	XBB.1.5	JD.1	JD.1	0	0.03	5	76	78.3505	5.15464
hCoV-19/Greece/NPHO-6793/2023	BG|XBB.1.5|EPI_ISL_18096581|2023-07-06|Greece	BG	EPI_ISL_18096581	Greece	2023-07-06	XBB.1.5	XBB.1.5	XBB.1.5	0.666667	0.03	5	74	76.2887	5.15464
hCoV-19/Israel/ICH-741198393/2023	BG|XCL|EPI_ISL_18096752|2023-08-01|Israel	BG	EPI_ISL_18096752	Israel	2023-08-01	XBB.1.5	XCL	XCL	0	0.03	6	68	70.1031	6.18557
hCoV-19/Israel/ICH-741198465/2023	BG|XBB.1.5.72|EPI_ISL_18096763|2023-08-02|Israel	BG	EPI_ISL_18096763	Israel	2023-08-02	BA.2.86*	XBB.1.5.72	XBB.1.5.72	0	0.03	3	69	71.134	3.09278
hCoV-19/Israel/SMC-7114551/2023	BG|JD.1.1|EPI_ISL_18096851|2023-08-03|Israel	BG	EPI_ISL_18096851	Israel	2023-08-03	Others	JD.1.1	JD.1.1	0	0.03	4	72	74.2268	4.12371
hCoV-19/Israel/SMC-7114582/2023	BG|GK.2.1|EPI_ISL_18096877|2023-08-06|Israel	BG	EPI_ISL_18096877	Israel	2023-08-06	Others	GK.2.1	GK.2.1	0	0.03	3	71	73.1959	3.09278
hCoV-19/Japan/PG-553433/2023	BG|XBB.1.5.90|EPI_ISL_18097862|2023-07-05|Japan	BG	EPI_ISL_18097862	Japan	2023-07-05	XBB.1.5	XBB.1.5.90	XBB.1.5.90	0	0.03	6	67	69.0722	6.18557
hCoV-19/Scotland/CLIMB-CM7YM1F6/2023	BG|XBB.1.5|EPI_ISL_18098233|2023-07-18|United_Kingdom	BG	EPI_ISL_18098233	United_Kingdom	2023-07-18	XBB.1.5	XBB.1.5	XBB.1.5	0	0.03	5	73	75.2577	5.15464
hCoV-19/Netherlands/NB-RIVM-130656/2023	BG|BA.2|EPI_ISL_18098299|2023-07-26|Netherlands	BG	EPI_ISL_18098299	Netherlands	2023-07-26	XBB.1.5	BA.2	BA.2	0.8	0.03	0	86	88.6598	0
hCoV-19/Canada/ON-KHS-05499-v1/2023	BG|XBB.1.5|EPI_ISL_18098476|2023-08-09|Canada	BG	EPI_ISL_18098476	Canada	2023-08-09	Others	XBB.1.5	XBB.1.5	0.8	0.03	5	76	78.3505	5.15464
hCoV-19/Spain/MD-HRYC-12820006/2023	BG|XBB.1.5.72|EPI_ISL_18098536|2023-07-09|Spain	BG	EPI_ISL_18098536	Spain	2023-07-09	XBB.1.5	XBB.1.5.72	XBB.1.5.72	0	0.03	5	71	73.1959	5.15464
hCoV-19/USA/TX-HMH-M-130811/2023	BG|XBB.1.5|EPI_ISL_18098628|2023-07-30|USA	BG	EPI_ISL_18098628	USA	2023-07-30	XBB.1.5	XBB.1.5 (consensus call)	XBB.1	0.8	0.03	5	73	75.2577	5.15464
hCoV-19/USA/TX-HMH-M-131033/2023	BG|XBB.1.5|EPI_ISL_18098734|2023-08-04|USA	BG	EPI_ISL_18098734	USA	2023-08-04	XBB.1.5	XBB.1.5 (consensus call)	XBB.1.16	0	0.03	5	74	76.2887	5.15464
hCoV-19/USA/TX-HMH-M-131086/2023	BG|XBB.1.5|EPI_ISL_18098787|2023-08-05|USA	BG	EPI_ISL_18098787	USA	2023-08-05	XBB	XBB.1.5 (consensus call)	XBB.1	0	0.03	5	72	74.2268	5.15464
hCoV-19/USA/TX-HMH-M-131087/2023	BG|XBB.1.5|EPI_ISL_18098788|2023-08-04|USA	BG	EPI_ISL_18098788	USA	2023-08-04	XBB	XBB.1.5 (consensus call)	XBB.1	0.777778	0.03	5	75	77.3196	5.15464
hCoV-19/USA/TX-HMH-M-130932/2023	BG|XBB.1.22|EPI_ISL_18098796|2023-08-03|USA	BG	EPI_ISL_18098796	USA	2023-08-03	XBB	XBB.1.22	XBB.1.16	0	0.03	5	73	75.2577	5.15464
hCoV-19/USA/TX-HMH-M-130991/2023	BG|XBB.1.9.1|EPI_ISL_18098854|2023-08-03|USA	BG	EPI_ISL_18098854	USA	2023-08-03	XBB.1.5	XBB.1.9.1	XBB.1.9.1	0	0.03	5	74	76.2887	5.15464
hCoV-19/USA/TX-HMH-M-130483/2023	BG|XBB.1.16.11|EPI_ISL_18098931|2023-07-27|USA	BG	EPI_ISL_18098931	USA	2023-07-27	XBB.1.5	XBB.1.16.11	XBB.1.16.11	0	0.03	5	85	87.6289	5.15464
hCoV-19/USA/TX-HMH-M-130529/2023	BG|XBB.1.5|EPI_ISL_18099001|2023-07-27|USA	BG	EPI_ISL_18099001	USA	2023-07-27	XBB	XBB.1.5 (consensus call)	XBB.1	0	0.03	5	78	80.4124	5.15464
hCoV-19/USA/TX-HMH-M-130417/2023	BG|XBB.1.5.37|EPI_ISL_18099105|2023-07-25|USA	BG	EPI_ISL_18099105	USA	2023-07-25	XBB.1.5	XBB.1.5.37	XBB.1.5	0.333333	0.03	5	76	78.3505	5.15464
hCoV-19/USA/TX-HMH-M-130758/2023	BG|XBB.1.5|EPI_ISL_18099198|2023-08-03|USA	BG	EPI_ISL_18099198	USA	2023-08-03	XBB.1.5	XBB.1.5 (consensus call)	XBB.1	0.5	0.03	5	74	76.2887	5.15464
hCoV-19/USA/TX-HMH-M-130659/2023	BG|XBB.1.5|EPI_ISL_18099292|2023-07-29|USA	BG	EPI_ISL_18099292	USA	2023-07-29	XBB	XBB.1.5	XBB.1.5	0.5	0.03	5	71	73.1959	5.15464
hCoV-19/USA/TX-HMH-M-130668/2023	BG|XBB.1.5.103|EPI_ISL_18099301|2023-07-28|USA	BG	EPI_ISL_18099301	USA	2023-07-28	XBB.1.5	XBB.1.5.103	KA.1	0	0.03	6	84	86.5979	6.18557
hCoV-19/USA/TX-HMH-M-130639/2023	BG|XBB.1.22|EPI_ISL_18099327|2023-07-28|USA	BG	EPI_ISL_18099327	USA	2023-07-28	XBB.1.5	XBB.1.22	XBB.1.22	0.333333	0.03	5	72	74.2268	5.15464
hCoV-19/USA/TX-HMH-M-130641/2023	BG|XBB.1.22|EPI_ISL_18099328|2023-07-30|USA	BG	EPI_ISL_18099328	USA	2023-07-30	XBB	XBB.1.22	XBB.1.22	0.666667	0.03	5	75	77.3196	5.15464
hCoV-19/Spain/EX-CHUC-50543963/2023	BG|XBB.1.5.104|EPI_ISL_18099347|2023-07-28|Spain	BG	EPI_ISL_18099347	Spain	2023-07-28	XBB	XBB.1.5.104	XBB.1.5.104	0	0.03	5	74	76.2887	5.15464
hCoV-19/Guatemala/1999-DLNS/2023	BG|XBB.1.5|EPI_ISL_18099386|2023-07-19|Guatemala	BG	EPI_ISL_18099386	Guatemala	2023-07-19	XBB.1.5	XBB.1.5	XBB.1.5	0	0.03	5	73	75.2577	5.15464
hCoV-19/Guatemala/2041-DLNS/2023	BG|XBB.1.5.77|EPI_ISL_18099411|2023-07-25|Guatemala	BG	EPI_ISL_18099411	Guatemala	2023-07-25	XBB.1.5	XBB.1.5.77	XBB.1.5.77	0	0.03	2	57	58.7629	2.06186
hCoV-19/Guatemala/1987-DLNS/2023	BG|XBB.1.5|EPI_ISL_18099412|2023-07-14|Guatemala	BG	EPI_ISL_18099412	Guatemala	2023-07-14	XBB.1.5	XBB.1.5	XBB.1.5	0.5	0.03	1	52	53.6082	1.03093
hCoV-19/Guatemala/2057-DLNS/2023	BG|XBB.1.5|EPI_ISL_18099414|2023-07-22|Guatemala	BG	EPI_ISL_18099414	Guatemala	2023-07-22	XBB.1.5	XBB.1.5	XBB.1.5	0.5	0.03	1	52	53.6082	1.03093
hCoV-19/Guatemala/2067-DLNS/2023	BG|XBB.1.5.106|EPI_ISL_18099417|2023-07-24|Guatemala	BG	EPI_ISL_18099417	Guatemala	2023-07-24	XBB.1.5	XBB.1.5.106	XBB.1.5.106	0	0.03	1	59	60.8247	1.03093
hCoV-19/Brazil/MG-FIOCRUZ-IRR201/2023	BG|JD.1.2|EPI_ISL_18099817|2023-07-12|Brazil	BG	EPI_ISL_18099817	Brazil	2023-07-12	Others	JD.1.2	JD.1.2	0	0.03	5	70	72.1649	5.15464
hCoV-19/Panama/M271724-GMI/2023	BG|XBB.1.5.72|EPI_ISL_18100053|2023-07-17|Panama	BG	EPI_ISL_18100053	Panama	2023-07-17	XBB.1.5	XBB.1.5.72	XBB.1.5.72	0	0.03	5	74	76.2887	5.15464
hCoV-19/Argentina/SC2-36419219-RFGB-ARX/2023	BG|XBB.1.5|EPI_ISL_18101652|2023-07-04|Argentina	BG	EPI_ISL_18101652	Argentina	2023-07-04	Others	XBB.1.5	XBB.1.5	0.5	0.03	5	76	78.3505	5.15464
hCoV-19/Mexico/CMX-INMEGEN-111-4/2023	BG|XBB.1.5|EPI_ISL_18103773|2023-07-18|Mexico	BG	EPI_ISL_18103773	Mexico	2023-07-18	XBB.1.5	XBB.1.5	XBB.1.5	0.5	0.03	5	77	79.3814	5.15464
hCoV-19/Canada/ON-PHL-23-27484-v2/2023	BG|XBB.1.5|EPI_ISL_18105008|2023-08-01|Canada	BG	EPI_ISL_18105008	Canada	2023-08-01	XBB.1.5	XBB.1.5	XBB.1.5	0.777778	0.03	5	74	76.2887	5.15464
hCoV-19/Canada/ON-PHL-23-27499/2023	BG|XBB.1.5.72|EPI_ISL_18105016|2023-08-02|Canada	BG	EPI_ISL_18105016	Canada	2023-08-02	XBB.1.5	XBB.1.5.72	XBB.1.5.72	0	0.03	5	77	79.3814	5.15464
hCoV-19/Canada/ON-PHL-23-27506/2023	BG|JD.1.1|EPI_ISL_18105023|2023-08-02|Canada	BG	EPI_ISL_18105023	Canada	2023-08-02	XBB.1.5	JD.1.1	JD.1.1.7	0	0.03	5	76	78.3505	5.15464
hCoV-19/Canada/ON-PHL-23-27552/2023	BG|XBB.1.5.72|EPI_ISL_18105066|2023-08-02|Canada	BG	EPI_ISL_18105066	Canada	2023-08-02	Others	XBB.1.5.72	XBB.1.5.72	0	0.03	5	76	78.3505	5.15464
hCoV-19/Canada/ON-PHL-23-27560-v2/2023	BG|XBB.1.5|EPI_ISL_18105074|2023-08-02|Canada	BG	EPI_ISL_18105074	Canada	2023-08-02	XBB.1.5	XBB.1.5	XBB.1.5	0.75	0.03	5	76	78.3505	5.15464
hCoV-19/Canada/ON-PHL-23-27596/2023	BG|HR.1|EPI_ISL_18105106|2023-08-07|Canada	BG	EPI_ISL_18105106	Canada	2023-08-07	Others	HR.1	HR.1	0	0.03	5	78	80.4124	5.15464
hCoV-19/Canada/ON-PHL-23-27611/2023	BG|JD.1.1|EPI_ISL_18105120|2023-08-04|Canada	BG	EPI_ISL_18105120	Canada	2023-08-04	XBB.1.5	JD.1.1	JD.1.1	0	0.03	5	75	77.3196	5.15464
hCoV-19/Japan/SUPCRC-5390/2023	BG|XBB.1.5|EPI_ISL_18106318|2023-07-21|Japan	BG	EPI_ISL_18106318	Japan	2023-07-21	XBB.1.5	XBB.1.5	XBB.1.5.110	0	0.03	5	76	78.3505	5.15464
hCoV-19/Japan/SUPCRC-5458/2023	BG|XBB.1.5|EPI_ISL_18106350|2023-07-30|Japan	BG	EPI_ISL_18106350	Japan	2023-07-30	XBB.1.5	XBB.1.5	XBB.1.5.73	0	0.03	5	74	76.2887	5.15464
hCoV-19/USA/AK-ANMC-0194/2023	BG|XBB.1.5.72|EPI_ISL_18106364|2023-07-22|USA	BG	EPI_ISL_18106364	USA	2023-07-22	XBB.1.5	XBB.1.5.72	XBB.1.5.72	0	0.03	5	84	86.5979	5.15464
hCoV-19/Scotland/CLIMB-CM7YKBDU/2023	BG|XBB.1.5|EPI_ISL_18106646|2023-07-15|United_Kingdom	BG	EPI_ISL_18106646	United_Kingdom	2023-07-15	Others	XBB.1.5	XBB.1.5	0.5	0.03	5	78	80.4124	5.15464
hCoV-19/Spain/IB-HUSE-08485/2023	BG|XBB.1.5|EPI_ISL_18106862|2023-07-11|Spain	BG	EPI_ISL_18106862	Spain	2023-07-11	XBB	XBB.1.5	XBB.1.5	0.5	0.03	5	73	75.2577	5.15464
hCoV-19/Brazil/RS-LGBM-HMV-02-0050-F/2023	BG|JD.1.2|EPI_ISL_18107192|2023-07-24|Brazil	BG	EPI_ISL_18107192	Brazil	2023-07-24	XBB.1.5	JD.1.2	JD.1.2	0	0.03	4	72	74.2268	4.12371
hCoV-19/USA/CA-LACPHL-AY01221/2023	BG|XBB.1.5.72|EPI_ISL_18107473|2023-07-14|USA	BG	EPI_ISL_18107473	USA	2023-07-14	XBB.1.5	XBB.1.5.72	XBB.1.5.72	0	0.03	5	75	77.3196	5.15464
hCoV-19/Brazil/PA-LACENPA-150395000/2023	BG|JD.1.2|EPI_ISL_18109268|2023-07-13|Brazil	BG	EPI_ISL_18109268	Brazil	2023-07-13	Others	JD.1.2	JD.1.2	0	0.03	5	77	79.3814	5.15464
hCoV-19/Brazil/PA-LACENPA-150395005/2023	BG|JD.1.2|EPI_ISL_18109272|2023-07-20|Brazil	BG	EPI_ISL_18109272	Brazil	2023-07-20	Others	JD.1.2	JD.1.2.2	0	0.03	5	78	80.4124	5.15464
hCoV-19/France/GES-IPP16760/2023	BG|XBB.1.5|EPI_ISL_18109736|2023-07-31|France	BG	EPI_ISL_18109736	France	2023-07-31	XBB.1.5	XBB.1.5	XBB.1.5	0	0.03	5	83	85.567	5.15464
hCoV-19/South Korea/KDCA257446/2023	BG|XBB.1.5|EPI_ISL_18111462|2023-07-29|South_Korea	BG	EPI_ISL_18111462	South_Korea	2023-07-29	Others	XBB.1.5	XBB.1.5	0	0.03	5	72	74.2268	5.15464
hCoV-19/South Korea/KDCA257549/2023	BG|XBB.1.5|EPI_ISL_18111584|2023-07-30|South_Korea	BG	EPI_ISL_18111584	South_Korea	2023-07-30	XBB.1.5	XBB.1.5	XBB.1.5	0	0.03	5	73	75.2577	5.15464
hCoV-19/South Korea/KDCA256219/2023	BG|XBB.1.5|EPI_ISL_18111674|2023-07-21|South_Korea	BG	EPI_ISL_18111674	South_Korea	2023-07-21	XBB.1.5	XBB.1.5 (consensus call)	XBB.1	0	0.03	6	74	76.2887	6.18557
hCoV-19/South Korea/KDCA257690/2023	BG|XBB.1.5|EPI_ISL_18111741|2023-08-06|South_Korea	BG	EPI_ISL_18111741	South_Korea	2023-08-06	XBB	XBB.1.5	XBB.1.5	0	0.03	5	73	75.2577	5.15464
hCoV-19/South Korea/KDCA257685/2023	BG|XBB.1.5|EPI_ISL_18111742|2023-08-06|South_Korea	BG	EPI_ISL_18111742	South_Korea	2023-08-06	XBB.1.5	XBB.1.5	XBB.1.5	0	0.03	5	74	76.2887	5.15464
hCoV-19/South Korea/KDCA257691/2023	BG|XBB.1.5|EPI_ISL_18111746|2023-08-06|South_Korea	BG	EPI_ISL_18111746	South_Korea	2023-08-06	XBB.1.5	XBB.1.5	XBB.1.5	0	0.03	5	77	79.3814	5.15464
hCoV-19/Germany/BY-RKI-I-1137131/2023	BG|XBB.1.5|EPI_ISL_18112095|2023-07-24|Germany	BG	EPI_ISL_18112095	Germany	2023-07-24	XBB.1.5	XBB.1.5	XBB.1.5	0	0.03	5	79	81.4433	5.15464
hCoV-19/Spain/AS-HUCA-232346782/2023	BG|XBB.1.5.71|EPI_ISL_18112376|2023-07-30|Spain	BG	EPI_ISL_18112376	Spain	2023-07-30	XBB.1.5	XBB.1.5.71	XBB.1.5.71	0	0.03	5	66	68.0412	5.15464
hCoV-19/Canada/NB-CHUDGLD-25G-MM00017R/2023	BG|XBB.1.5|EPI_ISL_18113704|2023-07-25|Canada	BG	EPI_ISL_18113704	Canada	2023-07-25	XBB.1.5	XBB.1.5	XBB.1.5	0	0.03	5	71	73.1959	5.15464
hCoV-19/USA/CA-HLX-STM-ANKQPP32Y/2023	BG|XBB.1.5.76|EPI_ISL_18113980|2023-07-25|USA	BG	EPI_ISL_18113980	USA	2023-07-25	XBB.1.5	XBB.1.5.76	XBB.1.5.76	0	0.03	3	66	68.0412	3.09278
hCoV-19/USA/CA-HLX-STM-TVG46X2QZ/2023	BG|XBB.1.5.77|EPI_ISL_18114164|2023-07-18|USA	BG	EPI_ISL_18114164	USA	2023-07-18	XBB.1.5	XBB.1.5.77	XBB.1.5.77	0	0.03	2	56	57.732	2.06186
hCoV-19/USA/OH-ODH-SC3031801/2023	BG|XBB.1.5.72|EPI_ISL_18114451|2023-07-15|USA	BG	EPI_ISL_18114451	USA	2023-07-15	XBB.1.5	XBB.1.5.72	XBB.1.5.72	0	0.03	5	77	79.3814	5.15464
hCoV-19/Canada/QC-L00640936001/2023	BG|XBB.1.5|EPI_ISL_18114554|2023-08-01|Canada	BG	EPI_ISL_18114554	Canada	2023-08-01	Others	XBB.1.5	XBB.1.5	0	0.03	5	78	80.4124	5.15464
hCoV-19/Israel/SMC-7114639/2023	BG|XBB.1.5|EPI_ISL_18115859|2023-08-09|Israel	BG	EPI_ISL_18115859	Israel	2023-08-09	XBB.1.5	XBB.1.5	XBB.1.5	0.5	0.03	3	64	65.9794	3.09278
hCoV-19/USA/IA-SHL-2321090/2023	BG|XBB.1.5.72|EPI_ISL_18115939|2023-08-09|USA	BG	EPI_ISL_18115939	USA	2023-08-09	XBB.1.5	XBB.1.5.72	XBB.1.5.72	0	0.03	5	76	78.3505	5.15464
hCoV-19/South Korea/KDCA255487/2023	BG|XBB.1.5.73|EPI_ISL_18116392|2023-07-14|South_Korea	BG	EPI_ISL_18116392	South_Korea	2023-07-14	XBB.1.5	XBB.1.5.73	XBB.1.5.73	0	0.03	5	73	75.2577	5.15464
hCoV-19/South Korea/KDCA255835/2023	BG|XBB.1.5|EPI_ISL_18116696|2023-07-17|South_Korea	BG	EPI_ISL_18116696	South_Korea	2023-07-17	XBB.1.5	XBB.1.5	XBB.1.5	0.666667	0.03	3	74	76.2887	3.09278
hCoV-19/South Korea/KDCA255941/2023	BG|XBB.1.5|EPI_ISL_18116789|2023-07-18|South_Korea	BG	EPI_ISL_18116789	South_Korea	2023-07-18	XBB.1.5	XBB.1.5	XBB.1.5	0	0.03	3	71	73.1959	3.09278
hCoV-19/South Korea/KDCA255980/2023	BG|XBB.1.5|EPI_ISL_18116821|2023-07-18|South_Korea	BG	EPI_ISL_18116821	South_Korea	2023-07-18	XBB.1.5	XBB.1.5	XBB.1.5	0	0.03	5	78	80.4124	5.15464
hCoV-19/South Korea/KDCA256135/2023	BG|XBB.1.5|EPI_ISL_18116949|2023-07-19|South_Korea	BG	EPI_ISL_18116949	South_Korea	2023-07-19	XBB.1.5	XBB.1.5	XBB.1.5	0	0.03	5	77	79.3814	5.15464
hCoV-19/South Korea/KDCA256583/2023	BG|XBB.1.5|EPI_ISL_18117281|2023-07-23|South_Korea	BG	EPI_ISL_18117281	South_Korea	2023-07-23	XBB.1.5	XBB.1.5	XBB.1.5	0	0.03	3	71	73.1959	3.09278
hCoV-19/South Korea/KDCA256634/2023	BG|XBB.1.5|EPI_ISL_18117323|2023-07-24|South_Korea	BG	EPI_ISL_18117323	South_Korea	2023-07-24	XBB.1.5	XBB.1.5 (consensus call)	XBB.1	0.5	0.03	3	64	65.9794	3.09278
hCoV-19/Spain/CL-42970/2023	BG|GN.3|EPI_ISL_18118333|2023-07-12|Spain	BG	EPI_ISL_18118333	Spain	2023-07-12	Others	GN.3	GN.3	0	0.03	4	62	63.9175	4.12371
hCoV-19/Belgium/ZNA_26364181/2023	MT|BA.2|EPI_ISL_18168238|2023-05-07|Belgium	MT	EPI_ISL_18168238	Belgium	2023-05-07	BA.2.86*	BA.2	BA.2	0	0.03	3	54	55.6701	3.09278
hCoV-19/France/un-IHUMI-076248/2022	MT|BA.2|EPI_ISL_18173168|2022-04|France	MT	EPI_ISL_18173168	France	2022-04	BA.2	BA.2	BA.2	0	0.03	0	63	64.9485	0
hCoV-19/South Africa/AHRI-N55999-1/2023	FG|BA.2.86|EPI_ISL_18226980|2023-07-28|South_Africa	FG	EPI_ISL_18226980	South_Africa	2023-07-28	BA.2	BA.2.86	BA.2.86	0	0.03	30	96	98.9691	30.9278
hCoV-19/South Africa/NICD-N56078/2023	FG|BA.2.86|EPI_ISL_18228511|2023-08-21|South_Africa	FG	EPI_ISL_18228511	South_Africa	2023-08-21	BA.2.86*	BA.2.86	BA.2.86	0	0.03	24	83	85.567	24.7423
hCoV-19/South Africa/NICD-N56079/2023	FG|BA.2.86|EPI_ISL_18228512|2023-08-18|South_Africa	FG	EPI_ISL_18228512	South_Africa	2023-08-18	BA.2.86*	BA.2.86	BA.2.86	0	0.03	24	83	85.567	24.7423
hCoV-19/South Africa/NICD-N56080/2023	FG|BA.2.86|EPI_ISL_18228513|2023-08-22|South_Africa	FG	EPI_ISL_18228513	South_Africa	2023-08-22	BA.2.86*	BA.2.86	BA.2.86	0.5	0.03	23	82	84.5361	23.7113
hCoV-19/South Africa/NICD-N56089/2023	FG|BA.2.86|EPI_ISL_18228521|2023-08-08|South_Africa	FG	EPI_ISL_18228521	South_Africa	2023-08-08	BA.2.86*	BA.2.86	BA.2.86	0	0.03	24	82	84.5361	24.7423
hCoV-19/South Africa/NICD-N56098/2023	FG|BA.2.86|EPI_ISL_18228530|2023-08-12|South_Africa	FG	EPI_ISL_18228530	South_Africa	2023-08-12	BA.2.86*	BA.2.86	BA.2.86	0	0.03	22	82	84.5361	22.6804
hCoV-19/Turkey/HSGM-AA00093/2023	MT|BA.2|EPI_ISL_18228596|2023-03-01|Turkey	MT	EPI_ISL_18228596	Turkey	2023-03-01	BA.2.86*	BA.2.10.1	BA.2.10.1	0.4	0.03	0	59	60.8247	0
hCoV-19/South Africa/NICD-R09472/2023	FG|BA.2.86.2|EPI_ISL_18234521|2023-08-21|South Africa	FG	EPI_ISL_18234521	South Africa	2023-08-21	BA.2.86*	BA.2.86.2	BA.2.86.2	0	0.03	24	84	86.5979	24.7423
hCoV-19/USA/OH-ODH-SC3032322/2023	FG|BA.2.86.1|EPI_ISL_18288070|2023-08-22|USA	FG	EPI_ISL_18288070	USA	2023-08-22	JN.1*	BA.2.86.1	BA.2.86.1	0	0.03	30	99	102.062	30.9278
hCoV-19/South Africa/NICD-N56137/2023	FG|BA.2.86.2|EPI_ISL_18326177|2023-08-23|South Africa	FG	EPI_ISL_18326177	South Africa	2023-08-23	BA.2.86*	BA.2.86.2	BA.2.86.2	0	0.03	24	86	88.6598	24.7423
hCoV-19/South Africa/NICD-N56194/2023	FG|BA.2.86.3|EPI_ISL_18326180|2023-09-04|South Africa	FG	EPI_ISL_18326180	South Africa	2023-09-04	BA.2.86*	BA.2.86.3	BA.2.86.3	0	0.03	23	86	88.6598	23.7113
hCoV-19/South Africa/NICD-N56129/2023	FG|BA.2.86|EPI_ISL_18326181|2023-08-22|South_Africa	FG	EPI_ISL_18326181	South_Africa	2023-08-22	BA.2.86*	BA.2.86	BA.2.86	0	0.03	24	85	87.6289	24.7423
hCoV-19/South Africa/NICD-N56134/2023	FG|BA.2.86|EPI_ISL_18326184|2023-08-21|South_Africa	FG	EPI_ISL_18326184	South_Africa	2023-08-21	BA.2.86*	BA.2.86	BA.2.86	0	0.03	24	85	87.6289	24.7423
hCoV-19/South Africa/NICD-N56181/2023	FG|BA.2.86.2|EPI_ISL_18326186|2023-09-01|South Africa	FG	EPI_ISL_18326186	South Africa	2023-09-01	BA.2.86*	BA.2.86.2	BA.2.86.2	0	0.03	24	84	86.5979	24.7423
hCoV-19/South Africa/NICD-R10093/2023	FG|BA.2.86.3|EPI_ISL_18341850|2023-08-30|South Africa	FG	EPI_ISL_18341850	South Africa	2023-08-30	BA.2.86*	BA.2.86.3	BA.2.86.3	0	0.03	24	87	89.6907	24.7423
hCoV-19/South Africa/NICD-N56309/2023	FG|BA.2.86|EPI_ISL_18397983|2023-09-16|South Africa	FG	EPI_ISL_18397983	South Africa	2023-09-16	BA.2.86*	BA.2.86	BA.2.86	0	0.03	24	84	86.5979	24.7423
hCoV-19/Spain/GA-SCQ_23-255315/2023	MT|BA.2|EPI_ISL_18400451|2023-09-15|Spain	MT	EPI_ISL_18400451	Spain	2023-09-15	BA.2	BA.2	BA.2	0	0.03	15	82	84.5361	15.4639
hCoV-19/South Africa/NICD-R10575/2023	FG|BA.2.86|EPI_ISL_18407199|2023-09-06|South_Africa	FG	EPI_ISL_18407199	South_Africa	2023-09-06	JN.1*	BA.2.86	BA.2.86	0	0.03	24	82	84.5361	24.7423
hCoV-19/South Africa/NICD-CRDM10926/2023	FG|BA.2.86|EPI_ISL_18407200|2023-09-21|South Africa	FG	EPI_ISL_18407200	South Africa	2023-09-21	BA.2.86*	BA.2.86	BA.2.86	0.5	0.03	24	85	87.6289	24.7423
hCoV-19/South Africa/NICD-CRDM10919/2023	FG|BA.2.86|EPI_ISL_18407201|2023-09-22|South Africa	FG	EPI_ISL_18407201	South Africa	2023-09-22	BA.2.86*	BA.2.86	BA.2.86	0	0.03	24	87	89.6907	24.7423
hCoV-19/South Africa/NICD-R10717/2023	FG|BA.2.86|EPI_ISL_18407202|2023-09-20|South Africa	FG	EPI_ISL_18407202	South Africa	2023-09-20	BA.2.86*	BA.2.86	BA.2.86	0	0.03	24	88	90.7216	24.7423
hCoV-19/Germany/SL-RKI-I-1138631/2023	FG|BA.2.86|EPI_ISL_18433009|2023-10-04|Germany	FG	EPI_ISL_18433009	Germany	2023-10-04	BA.2.86*	BA.2.86	BA.2.86	0	0.03	21	81	83.5052	21.6495
hCoV-19/South Korea/KDCA268414/2023	FG|BA.2.86.1|EPI_ISL_18438879|2023-09-25|South Korea	FG	EPI_ISL_18438879	South Korea	2023-09-25	BA.2.86*	BA.2.86.1	BA.2.86.1	0	0.03	25	88	90.7216	25.7732
hCoV-19/Italy/CAM-TIGEM-48545/2023	MT|BA.2|EPI_ISL_18443753|2023-10|Italy	MT	EPI_ISL_18443753	Italy	2023-10	BA.2	BA.2	BA.2	0	0.03	1	55	56.701	1.03093
hCoV-19/Belgium/AZDelta-2341-02774/2023	FG|JN.1.1|EPI_ISL_18445384|2023-10-09|Belgium	FG	EPI_ISL_18445384	Belgium	2023-10-09	BA.2.86*	JN.1.1	JN.1.1	0	0.03	27	94	96.9072	27.8351
hCoV-19/Belgium/AZDelta-2342-07448/2023	FG|BA.2.86.1|EPI_ISL_18445437|2023-10-09|Belgium	FG	EPI_ISL_18445437	Belgium	2023-10-09	JN.1*	BA.2.86.1	BA.2.86.1	0.5	0.03	27	91	93.8144	27.8351
hCoV-19/Italy/EMR-IZSLER-333844-003-01/2023	FG|BA.2.86.1|EPI_ISL_18449687|2023-10-18|Italy	FG	EPI_ISL_18449687	Italy	2023-10-18	BA.2.86*	BA.2.86.1	BA.2.86.1	0	0.03	24	80	82.4742	24.7423
hCoV-19/South Korea/KDCA269860/2023	FG|BA.2.86.1|EPI_ISL_18461066|2023-10-10|South Korea	FG	EPI_ISL_18461066	South Korea	2023-10-10	BA.2.86*	BA.2.86.1	BA.2.86.1	0	0.03	25	89	91.7526	25.7732
hCoV-19/Cyprus/BMV6895/2022	MT|BA.2|EPI_ISL_18479091|2022-04-09|Cyprus	MT	EPI_ISL_18479091	Cyprus	2022-04-09	BA.2	BA.2	BA.2	0	0.03	1	57	58.7629	1.03093
hCoV-19/Greece/11670/2023	FG|BA.2.86.1|EPI_ISL_18490934|2023-10-04|Greece	FG	EPI_ISL_18490934	Greece	2023-10-04	JN.1*	BA.2.86.1	BA.2.86.1	0.5	0.03	26	87	89.6907	26.8041
hCoV-19/Italy/LOM_Niguarda_80320524VUR/2023	MT|BA.2|EPI_ISL_18496352|2023-11-07|Italy	MT	EPI_ISL_18496352	Italy	2023-11-07	BA.2.86*	BA.2	BA.2	0	0.03	15	74	76.2887	15.4639
hCoV-19/South Korea/KDCA_270760/2023	FG|BA.2.86.1|EPI_ISL_18503709|2023-10-18|South Korea	FG	EPI_ISL_18503709	South Korea	2023-10-18	JN.1*	BA.2.86.1	BA.2.86.1	0	0.03	25	86	88.6598	25.7732
hCoV-19/South Africa/NICD-N56637/2023	FG|BA.2.86|EPI_ISL_18507121|2023-09-25|South_Africa	FG	EPI_ISL_18507121	South_Africa	2023-09-25	BA.2.86*	BA.2.86	BA.2.86	0	0.03	22	81	83.5052	22.6804
hCoV-19/South Africa/NICD-N56776/2023	FG|BA.2.86|EPI_ISL_18507141|2023-09-19|South Africa	FG	EPI_ISL_18507141	South Africa	2023-09-19	Others	BA.2.86	BA.2.86	0	0.03	25	86	88.6598	25.7732
hCoV-19/South Africa/NICD-N56853/2023	FG|BA.2.86.2|EPI_ISL_18507158|2023-10-04|South Africa	FG	EPI_ISL_18507158	South Africa	2023-10-04	JN.1*	BA.2.86.2	BA.2.86.2	0	0.03	27	91	93.8144	27.8351
hCoV-19/USA/CO-CDPHE-41442010/2023	MT|BA.2|EPI_ISL_18507721|2023-10-20|USA	MT	EPI_ISL_18507721	USA	2023-10-20	JN.1*	BA.2	BA.2	0	0.03	7	63	64.9485	7.21649
hCoV-19/USA/VA-VTVAS3-GSC44156/2023	FG|JN.1.1|EPI_ISL_18511775|2023-10-23|USA	FG	EPI_ISL_18511775	USA	2023-10-23	BA.2.86*	JN.1.1	JN.1.1	0	0.03	30	100	103.093	30.9278
hCoV-19/Belgium/CHUNamur14786049/2023	FG|JN.1.1|EPI_ISL_18512104|2023-11-07|Belgium	FG	EPI_ISL_18512104	Belgium	2023-11-07	JN.1*	JN.1.1	JN.1.1	0	0.03	30	102	105.155	30.9278
hCoV-19/USA/IL-C23WGS3210/2023	MT|BA.2|EPI_ISL_18517574|2023-10-26|USA	MT	EPI_ISL_18517574	USA	2023-10-26	BA.2.86*	BA.2	BA.2	0	0.03	19	78	80.4124	19.5876
hCoV-19/Ireland/CO-CUH-SC0497/2023	FG|BA.2.86.4|EPI_ISL_18521215|2023-11-13|Ireland	FG	EPI_ISL_18521215	Ireland	2023-11-13	JN.1*	XDT (consensus call)	XDT	0	0.03	25	94	96.9072	25.7732
hCoV-19/Germany/BY-MVP-000021539/2023	FG|BA.2.86.1|EPI_ISL_18526003|2023-10-07|Germany	FG	EPI_ISL_18526003	Germany	2023-10-07	JN.1*	BA.2.86.1	BA.2.86	0.5	0.03	7	64	65.9794	7.21649
hCoV-19/USA/LA-EVTL20495/2023	FG|JN.1|EPI_ISL_18530062|2023-11-12|USA	FG	EPI_ISL_18530062	USA	2023-11-12	JN.1*	JN.1	JN.1	0	0.03	19	76	78.3505	19.5876
hCoV-19/USA/LA-EVTL20557/2023	FG|JN.2|EPI_ISL_18530120|2023-11-08|USA	FG	EPI_ISL_18530120	USA	2023-11-08	JN.1*	JN.2	JN.2	0.75	0.03	21	82	84.5361	21.6495
hCoV-19/England/CLIMB-CM7YMPZA/2023	FG|JN.1.1|EPI_ISL_18530472|2023-11-12|United Kingdom	FG	EPI_ISL_18530472	United Kingdom	2023-11-12	JN.1*	JN.1.1	JN.1.1	0	0.03	30	101	104.124	30.9278
hCoV-19/Germany/TH-RKI-I-1139423/2023	FG|JN.1|EPI_ISL_18530957|2023-11-03|Germany	FG	EPI_ISL_18530957	Germany	2023-11-03	BA.2.86*	JN.1	JN.1	0	0.03	21	83	85.567	21.6495
hCoV-19/Netherlands/NB-RIVM-132769/2023	FG|JN.9|EPI_ISL_18535794|2023-10-16|Netherlands	FG	EPI_ISL_18535794	Netherlands	2023-10-16	JN.1*	JN.9	JN.9	0	0.03	29	95	97.9381	29.8969
hCoV-19/Netherlands/ZH-RIVM-132908/2023	FG|BA.2.86.1|EPI_ISL_18535922|2023-10-31|Netherlands	FG	EPI_ISL_18535922	Netherlands	2023-10-31	JN.1*	BA.2.86.1	BA.2.86.1	0	0.03	30	100	103.093	30.9278
hCoV-19/France/IDF-APHPSU_PSL-662310001518/2023	FG|JN.1.1|EPI_ISL_18537679|2023-10-01|France	FG	EPI_ISL_18537679	France	2023-10-01	BA.2.86*	JN.1.1	JN.1.1	0	0.03	21	81	83.5052	21.6495
hCoV-19/Switzerland/UN-HUG-43088305/2023	FG|BA.2.86.1|EPI_ISL_18538051|2023-11-12|Switzerland	FG	EPI_ISL_18538051	Switzerland	2023-11-12	JN.1*	BA.2.86.1	BA.2.86.1	0	0.03	30	97	100	30.9278
hCoV-19/Spain/CT-HUVH-E54688/2023	FG|JN.1.1|EPI_ISL_18544257|2023-11-14|Spain	FG	EPI_ISL_18544257	Spain	2023-11-14	JN.1*	JN.1.1	JN.1.1	0	0.03	30	101	104.124	30.9278
hCoV-19/France/PAC-HCL723001533701/2023	FG|JN.1.1|EPI_ISL_18545333|2023-11-13|France	FG	EPI_ISL_18545333	France	2023-11-13	JN.1*	JN.1.1	JN.1.1	0	0.03	30	103	106.186	30.9278
hCoV-19/Scotland/CLIMB-CM7YFBC9/2023	FG|JN.2|EPI_ISL_18552985|2023-11-09|United Kingdom	FG	EPI_ISL_18552985	United Kingdom	2023-11-09	JN.1*	JN.2	JN.2	0	0.03	29	90	92.7835	29.8969
hCoV-19/Scotland/CLIMB-CM7YRPJ1/2023	FG|JN.2|EPI_ISL_18553029|2023-11-15|United Kingdom	FG	EPI_ISL_18553029	United Kingdom	2023-11-15	JN.1*	JN.2	JN.2	0.5	0.03	29	102	105.155	29.8969
hCoV-19/Scotland/CLIMB-CM7YMQBK/2023	FG|JN.2|EPI_ISL_18553119|2023-11-14|United Kingdom	FG	EPI_ISL_18553119	United Kingdom	2023-11-14	JN.1*	JN.2	JN.2	0	0.03	29	96	98.9691	29.8969
hCoV-19/USA/CA-CDPH-500126588/2023	FG|BA.2.86.1|EPI_ISL_18555831|2023-09-19|USA	FG	EPI_ISL_18555831	USA	2023-09-19	BA.2	BA.2.86.1	BA.2.86.1	0	0.03	29	96	98.9691	29.8969
hCoV-19/USA/CA-CDPH-500126656/2023	FG|BA.2.86.1|EPI_ISL_18555886|2023-09-19|USA	FG	EPI_ISL_18555886	USA	2023-09-19	BA.2.86*	BA.2.86.1	BA.2.86.1	0	0.03	30	95	97.9381	30.9278
hCoV-19/Italy/LIG-HSMGE1393/2023	FG|JN.1.1|EPI_ISL_18557821|2023-11-14|Italy	FG	EPI_ISL_18557821	Italy	2023-11-14	BA.2.86*	JN.1.1	JN.1.1	0	0.03	29	99	102.062	29.8969
hCoV-19/South Africa/NICD-N56868/2023	FG|BA.2.86|EPI_ISL_18557863|2023-10-08|South Africa	FG	EPI_ISL_18557863	South Africa	2023-10-08	JN.1*	BA.2.86	BA.2.86	0	0.03	24	83	85.567	24.7423
hCoV-19/South Africa/NICD-N56889/2023	FG|BA.2.86|EPI_ISL_18557877|2023-09-19|South Africa	FG	EPI_ISL_18557877	South Africa	2023-09-19	BA.2.86*	BA.2.86	BA.2.86	0	0.03	24	84	86.5979	24.7423
hCoV-19/South Africa/NICD-N56895/2023	FG|BA.2.86.2|EPI_ISL_18557882|2023-10-13|South Africa	FG	EPI_ISL_18557882	South Africa	2023-10-13	BA.2.86*	BA.2.86.2	BA.2.86.2	0	0.03	24	88	90.7216	24.7423
hCoV-19/South Africa/NICD-N56915/2023	FG|BA.2.86|EPI_ISL_18557892|2023-09-29|South Africa	FG	EPI_ISL_18557892	South Africa	2023-09-29	BA.2.86*	BA.2.86	BA.2.86	0	0.03	24	85	87.6289	24.7423
hCoV-19/South Africa/NICD-N56918/2023	FG|BA.2.86|EPI_ISL_18557894|2023-10-09|South Africa	FG	EPI_ISL_18557894	South Africa	2023-10-09	BA.2.86*	BA.2.86	BA.2.86	0	0.03	24	85	87.6289	24.7423
hCoV-19/Norway/Ahus-5315/2023	FG|BA.2.86.1|EPI_ISL_18560593|2023-11-07|Norway	FG	EPI_ISL_18560593	Norway	2023-11-07	BA.2.86*	BA.2.86.1	BA.2.86.1	0	0.03	30	98	101.031	30.9278
hCoV-19/Japan/PG-580862/2023	FG|JN.1|EPI_ISL_18563623|2023-10-24|Japan	FG	EPI_ISL_18563623	Japan	2023-10-24	JN.1*	JN.1	JN.1	0	0.03	27	93	95.8763	27.8351
hCoV-19/Belgium/Jessa_21-2347-000784/2023	FG|JN.1|EPI_ISL_18566095|2023-11-23|Belgium	FG	EPI_ISL_18566095	Belgium	2023-11-23	JN.1*	JN.1.19	JN.1.19	0	0.03	21	82	84.5361	21.6495
hCoV-19/South Africa/NICD-R11551/2023	FG|BA.2.86.2|EPI_ISL_18566818|2023-11-01|South Africa	FG	EPI_ISL_18566818	South Africa	2023-11-01	BA.2.86*	BA.2.86.2	BA.2.86.2	0	0.03	25	86	88.6598	25.7732
hCoV-19/Germany/NW-RKI-I-1139516/2023	FG|JN.1|EPI_ISL_18570251|2023-11-13|Germany	FG	EPI_ISL_18570251	Germany	2023-11-13	Others	JN.1	JN.1	0	0.03	21	80	82.4742	21.6495
hCoV-19/Netherlands/GR-RIVM-133584/2023	FG|JN.10|EPI_ISL_18576777|2023-11-08|Netherlands	FG	EPI_ISL_18576777	Netherlands	2023-11-08	JN.1*	JN.10	JN.10	0	0.03	29	98	101.031	29.8969
hCoV-19/Netherlands/UT-RIVM-133541/2023	FG|JN.1|EPI_ISL_18576955|2023-11-13|Netherlands	FG	EPI_ISL_18576955	Netherlands	2023-11-13	JN.1*	JN.1	JN.1	0	0.03	29	98	101.031	29.8969
hCoV-19/Netherlands/ZH-RIVM-133561/2023	FG|JN.1|EPI_ISL_18577002|2023-11-13|Netherlands	FG	EPI_ISL_18577002	Netherlands	2023-11-13	JN.1*	JN.1.19	JN.1.19	0	0.03	29	102	105.155	29.8969
hCoV-19/Canada/ON-PHL-23-42433/2023	FG|JN.1.1|EPI_ISL_18582366|2023-11-14|Canada	FG	EPI_ISL_18582366	Canada	2023-11-14	JN.1*	JN.1.1	JN.1.1	0	0.03	22	84	86.5979	22.6804
hCoV-19/USA/IL-C23WGS3296/2023	MT|BA.2|EPI_ISL_18584014|2023-11-08|USA	MT	EPI_ISL_18584014	USA	2023-11-08	JN.1*	BA.2	JN.1	0	0.03	19	79	81.4433	19.5876
hCoV-19/USA/VA-VCUVAS3-WABA462714/2023	FG|BA.2.86.1|EPI_ISL_18584158|2023-10-21|USA	FG	EPI_ISL_18584158	USA	2023-10-21	BA.2	BA.2.86.1	BA.2	0	0.03	18	83	85.567	18.5567
hCoV-19/Spain/AS-HUCA-72221/2023	FG|JN.5|EPI_ISL_18584240|2023-11-28|Spain	FG	EPI_ISL_18584240	Spain	2023-11-28	BA.2.86*	JN.5	JN.5	0	0.03	30	87	89.6907	30.9278
hCoV-19/USA/VA-VCUVAS3-QZPT587304/2023	FG|BA.2.86.1|EPI_ISL_18584594|2023-10-05|USA	FG	EPI_ISL_18584594	USA	2023-10-05	BA.2	BA.2.86.1	BA.2.86.1	0	0.03	30	96	98.9691	30.9278
hCoV-19/France/IDF-APHPSU_PSL-662311003833/2023	FG|JN.1.1|EPI_ISL_18586198|2023-11-02|France	FG	EPI_ISL_18586198	France	2023-11-02	JN.1*	JN.1.1	JN.1.1	0	0.03	21	81	83.5052	21.6495
hCoV-19/Italy/LOM_Unimi-4436/2023	FG|JN.1|EPI_ISL_18588331|2023-11-27|Italy	FG	EPI_ISL_18588331	Italy	2023-11-27	JN.1*	JN.1	JN.1	0	0.03	25	91	93.8144	25.7732
hCoV-19/Spain/GA-CHUAC-11770/2023	FG|BA.2.86.1|EPI_ISL_18593906|2023-11-24|Spain	FG	EPI_ISL_18593906	Spain	2023-11-24	JN.1*	BA.2.86.1	BA.2.86.1	0	0.03	25	92	94.8454	25.7732
hCoV-19/Israel/SMC-7116033/2023	FG|JN.1.1|EPI_ISL_18594326|2023-11-27|Israel	FG	EPI_ISL_18594326	Israel	2023-11-27	JN.1*	JN.1.1	JN.1.1	0	0.03	25	90	92.7835	25.7732
hCoV-19/USA/MN-MDH-37779/2023	FG|BA.2.86.1|EPI_ISL_18594989|2023-11-18|USA	FG	EPI_ISL_18594989	USA	2023-11-18	JN.1*	BA.2.86.1	BA.2.86.1	0	0.03	29	95	97.9381	29.8969
hCoV-19/South Korea/KDCA274905/2023	FG|JN.1|EPI_ISL_18597396|2023-11-07|South Korea	FG	EPI_ISL_18597396	South Korea	2023-11-07	BA.2.86*	JN.1	JN.1	0	0.03	25	89	91.7526	25.7732
hCoV-19/South Korea/KDCA274954/2023	FG|BA.2.86.1|EPI_ISL_18597440|2023-11-08|South Korea	FG	EPI_ISL_18597440	South Korea	2023-11-08	JN.1*	BA.2.86.1	BA.2.86.1	0.5	0.03	29	93	95.8763	29.8969
hCoV-19/South Korea/KDCA274979/2023	FG|BA.2.86.1|EPI_ISL_18597462|2023-11-08|South Korea	FG	EPI_ISL_18597462	South Korea	2023-11-08	BA.2.86*	BA.2.86.1	BA.2.86.1	0.5	0.03	30	96	98.9691	30.9278
hCoV-19/Germany/BE-RKI-I-1140473/2023	FG|JN.3.1|EPI_ISL_18599827|2023-11-16|Germany	FG	EPI_ISL_18599827	Germany	2023-11-16	JN.1*	JN.3.1	JN.3.1	0	0.03	20	85	87.6289	20.6186
hCoV-19/Germany/BE-RKI-I-1140478/2023	FG|BA.2.86.1|EPI_ISL_18599832|2023-11-13|Germany	FG	EPI_ISL_18599832	Germany	2023-11-13	JN.1*	JN.11	JN.11	0.5	0.03	20	75	77.3196	20.6186
[truncated: 5,759 more rows]
